# Supplementary material for: A KMT2A-AFF1 gene regulatory network highlights the role of core transcription factors and reveals the regulatory logic of key downstream target genes
Source: Genome Res. 2021 Jul;31(7):1159–73. doi: 10.1101/gr.268490.120 (PMC8256865; doi:10.1101/gr.268490.120)
Supplement: Supplemental Material [file supp_gr.268490.120_Supplemental_Data_S1.xlsx]

## Sheet: Legend
Supplemental Data S1. KMT2A-AFF1 and RUNX1 network annotated edge and node tables.
GRN tables for KMT2A-AFF1 and RUNX1 GRNs. Node tables show GRN genes annotated with centrality measures, RNA-seq analysis results, and CRISPR screen classifications. Edge tables show predicted regulatory interactions.

## Sheet: KMT2A-AFF1 GRN nodes
			KMT2A-AFF1 siRNA nas.RNA-seq stats		RUNX1 siRNA nas.RNA-seq stats		EPZ-5676 nas.RNA-seq stats		iBET nas.RNA-seq stats
Geneid	degree	stress	KMT2A-AFF1.logFC	KMT2A-AFF1.FDR	RUNX1.logFC	RUNX1.FDR	EPZ.logFC	EPZ.FDR	IBET.logFC	IBET.FDR	Tzelepis_CRISPR_screen_dropout_class
EGR1	464	29049	0.934544	6.73529e-16	-1.05465	4.56384e-09	-0.755978	1.37232e-05	1.73655	1.3912e-46	non-dropout
FOSL2	217	7404	-0.520527	4.73141e-25	-0.422475	6.22177e-07	-0.267609	0.120307	-0.206857	0.000824963	non-dropout
ARNT	559	7646	0.237496	0.000414515	0.104631	0.277123	0.265296	0.160537	-0.397389	3.36067e-06	non-leukemia-specific dropout
MYC	1154	89851	-0.248787	4.12572e-05	-0.10124	0.412391	-0.812423	6.62392e-08	-1.51086	2.26548e-127	non-leukemia-specific dropout
RREB1	319	15594	0.25788	6.0736e-06	0.152684	0.039488	-0.187635	0.278941	-0.267183	1.3564e-05	non-dropout
STAT1	404	21662	0.23965	0.000630593	-0.117538	0.125643	-0.218531	0.213583	0.618613	2.33228e-25	non-dropout
CREB1	20	523	-0.0216208	0.793037	-0.220705	0.00448337	0.383212	0.0422337	0.0898596	0.164566	non-dropout
NR3C1	163	23231	-0.685778	5.91022e-35	-0.331098	6.42126e-08	-0.0829398	0.670189	-0.538367	4.78538e-21	non-dropout
GTF2I	472	78560	0.147518	0.0199241	0.124437	0.0990959	-0.00970932	0.967331	-0.988454	9.30649e-40	non-dropout
HOXA9	161	4889	-1.06638	3.28411e-48	0.0336723	0.813097	-0.742344	2.39548e-05	0.067141	0.486335	non-dropout
LMO2	573	68980	-0.488802	2.54533e-14	-0.00867094	0.943942	0.436043	0.0140735	-1.66809	6.92228e-99	non-dropout
MAZ	1349	42350	-0.167455	0.0322311	-0.0117738	0.921989	-0.431027	0.0174232	-0.85902	3.67086e-47	non-dropout
MEIS1	91	1135	-0.458249	7.32478e-17	0.24367	3.48732e-05	0.207176	0.222545	0.365561	2.41604e-12	non-dropout
NFYA	1083	37107	0.182021	0.00263295	-0.337716	6.07241e-08	-0.116503	0.524222	-0.0469703	0.469004	non-dropout
E2F5	263	7731	0.227133	0.0116165	0.0167262	0.907257	0.0135278	0.964594	-0.189537	0.0341834	non-dropout
FOXO3	214	9695	-0.183317	0.00513603	-0.274864	4.42954e-05	-0.35969	0.0315995	0.378345	1.26449e-09	non-dropout
MEF2A	288	17669	-0.343634	5.4229e-07	-0.0971151	0.185529	-0.0350229	0.875475	-0.145194	0.0131892	non-dropout
MEF2C	293	18223	-0.55483	3.67835e-19	0.139916	0.022966	-0.421019	0.00569852	-0.0111466	0.851284	non-dropout
KMT2A	1403	91124	-0.165467	0.00468636	0.103073	0.115671	-0.287071	0.0711959	0.118295	0.039334	non-dropout
NCOR1	106	5925	-0.156596	0.00386718	-0.0433673	0.613254	-0.0677877	0.731519	-0.217467	0.000215141	non-dropout
EBF1	6	133	0.059328	0.393546	0.0992939	0.165788	-0.142029	0.433074	0.158025	0.00387777	non-dropout
PATZ1	25	990	-0.00888998	0.924737	0.283226	0.000599682	-0.210587	0.282243	-0.170974	0.0167648	non-dropout
RUNX2	214	6409	-0.306261	1.25238e-06	0.284988	6.02673e-06	-0.147702	0.413574	0.123231	0.0276544	non-dropout
RUNX1	636	80864	-0.719582	3.25934e-47	0.106548	0.0917954	-0.331148	0.0284662	0.100256	0.0556349	AF4 & AF9
ELF1	1326	74412	-0.442528	3.14422e-14	-0.0257573	0.756426	-0.14977	0.384996	-0.00561941	0.929108	non-dropout
IKZF2	233	7776	0.589809	1.42196e-22	-0.410411	4.23116e-06	1.00515	2.02832e-11	-0.112619	0.0886884	non-dropout
GTF2A1	120	6894	-0.244141	0.0199093	-0.776305	2.78636e-19	0.366473	0.0564319	0.0281707	0.74535	non-dropout
NFIL3	135	2174	-0.407918	5.05854e-12	0.147442	0.172924	-0.38079	0.0179249	-0.129107	0.0569684	non-dropout
PAX5	177	2350	-0.365249	2.72933e-13	0.0696977	0.472308	-0.34772	0.0290786	0.123358	0.0259541	non-dropout
TEF	146	2640	-0.656009	6.32985e-11	-0.0637425	0.645804	-0.394686	0.121408	-0.285066	0.081396	non-dropout
IKZF1	251	13299	-1.28082	2.45285e-92	0.926292	2.80025e-43	-0.550993	0.000233498	-0.357948	1.48157e-09	non-dropout
RBPJ	212	15199	0.167366	0.0102072	-0.260935	0.000412363	0.0458116	0.839765	-0.251964	5.76691e-05	non-dropout
REL	259	16184	0.270151	0.00136136	-0.322101	0.000114001	0.430096	0.0298987	0.693928	4.64765e-23	non-dropout
ZNF143	350	6490	-0.171848	0.0264875	-0.173791	0.110725	0.00548073	0.98416	-0.935388	3.51763e-28	non-dropout
CLOCK	425	813	0.147623	0.037983	-0.109111	0.183338	0.241857	0.204161	-0.469483	1.22118e-13	non-dropout
UHRF1	301	8560	-0.161378	0.00458007	-0.260284	7.50411e-05	-0.193619	0.275391	-0.480045	4.45658e-18	NA
PAX6	8	30	-0.646248	3.31208e-19	-0.203976	0.00511299	0.0525418	0.84398	1.25114	5.09332e-60	non-dropout
IRF1	199	17558	-0.265191	0.00029558	0.00677682	0.957126	-0.308124	0.0776965	-0.263398	3.05184e-05	non-dropout
IRF2	214	50538	-0.499553	9.62959e-14	-0.0421768	0.700488	-0.289857	0.127564	-0.619966	8.27995e-12	non-dropout
ARID5B	159	53564	-0.292896	4.43348e-05	1.23692	4.60122e-83	0.258314	0.114946	0.088998	0.281358	non-dropout
FOXP1	222	19924	-0.139587	0.0441605	0.203611	0.00298649	-0.247276	0.163629	0.0155256	0.846212	non-dropout
HBP1	197	10307	0.468436	6.80529e-10	0.173808	0.022868	0.613892	0.000799522	0.0736387	0.496111	non-dropout
HMGB2	197	1411	-0.317996	7.95104e-07	-0.242079	0.000471321	-0.150114	0.440125	0.321408	7.76335e-09	non-dropout
MIR101-1	36	2596	NA	NA	-0.00795011	0.990113	NA	NA	NA	NA	NA
MIR16-2	57	4618	NA	NA	-0.576837	0.195022	NA	NA	0.797418	0.0206622	NA
LEF1	267	15594	-0.410059	1.74523e-11	0.559666	8.95377e-23	-0.563108	0.000329728	-0.414727	1.57093e-14	non-dropout
PTTG1	255	3065	-0.37962	1.49335e-07	0.0103289	0.933045	-0.341755	0.0706255	1.02149	7.48587e-36	non-dropout
ATF4	225	7729	-0.171767	0.0112113	-0.0823509	0.346061	-0.507685	0.00171066	0.499241	1.07977e-16	non-dropout
IRX5	105	109	-0.227499	0.0427836	-0.487658	0.000159691	0.0246606	0.939953	0.883577	2.07674e-15	non-dropout
ZHX3	106	1407	-0.149711	0.0351842	0.400527	4.52956e-06	-0.0579928	0.802497	0.0963496	0.242265	non-dropout
FLI1	121	10960	-0.142843	0.0288892	0.325298	2.65872e-06	0.380228	0.0161413	0.0973219	0.263952	non-dropout
MIR21	110	13405	0.866785	0.00241398	NA	NA	NA	NA	1.0519	0.005294	NA
BACH2	160	25818	0.610141	2.62684e-17	2.10409	4.88483e-170	1.376	1.97777e-17	0.416596	0.000311648	non-dropout
MYB	56	3797	0.0436848	0.703726	0.417309	7.47586e-09	0.191442	0.310827	-0.8127	8.438e-30	AF4 & AF9
MIR548Z	99	9470	NA	NA	NA	NA	NA	NA	NA	NA	NA
MIR200C	32	3320	NA	NA	NA	NA	NA	NA	NA	NA	NA
JUN	26	406	-0.140728	0.0864563	-0.481028	1.2924e-05	-0.216574	0.325501	1.26456	2.8163e-26	non-dropout
JUND	19	276	0.0970776	0.423412	-0.259313	0.00983832	-0.208236	0.275914	0.686958	1.11286e-24	non-dropout
NFE2L1	27	1932	-0.0263609	0.755375	-0.112293	0.18365	-0.199453	0.248735	0.14332	0.0284398	non-dropout
PIAS2	7	1	0.148222	0.0377	-0.0127344	0.923979	0.179	0.373531	0.0172159	0.821224	non-dropout
CTCF	17	920	-0.0753141	0.302812	0.07867	0.360102	-0.13408	0.448826	-0.431857	1.45828e-12	non-leukemia-specific dropout
BCL6	21	1304	-0.133992	0.0832364	1.72795	1.26234e-85	0.498946	0.00313611	0.996712	3.46068e-29	non-dropout
YY1	44	3567	-0.0230043	0.769297	-0.119935	0.148685	-0.20887	0.221284	0.351534	9.0023e-09	non-dropout
BPTF	6	254	-0.0451426	0.521486	0.342556	1.56193e-06	0.241671	0.146851	-0.260222	8.24716e-06	non-leukemia-specific dropout
MIR636	26	1645	0.0445728	0.910469	0.0828879	0.870743	-0.590527	0.26944	0.272774	0.515533	NA
ETS2	19	1886	-0.0243111	0.74065	-0.0926957	0.290736	-0.0168543	0.942877	-0.228126	6.54596e-05	non-dropout
CEBPA	17	1450	0.0362733	0.691928	-0.961488	2.33588e-22	0.328157	0.124913	-0.236078	0.000805252	AF4 & AF9
NFKB1	17	579	0.0881789	0.253855	0.114159	0.160301	-0.149611	0.429233	-0.622958	1.94251e-19	non-dropout
MIR589	6	323	NA	NA	0.441906	0.312353	NA	NA	0.633926	0.166689	NA
TGIF1	11	521	0.0021341	0.980641	0.0460995	0.683681	-0.0668554	0.754752	-0.74859	4.72976e-23	non-dropout
ABL1	9	29	0.143133	0.0276824	-0.0734964	0.469135	-0.333437	0.0439202	-0.208554	0.00119629	non-dropout
POU2F1	13	152	-0.0828547	0.242125	-0.00632333	0.95103	0.351662	0.0485895	0.06861	0.325819	non-dropout
NFATC2	8	107	0.0187723	0.835133	0.523441	3.15752e-10	-0.0233348	0.919227	0.0379461	0.676347	non-dropout
NFATC3	10	213	0.0214934	0.832949	-0.294769	1.64862e-07	-0.100763	0.587589	-0.289765	2.56613e-06	non-dropout
ZNF148	10	241	-0.0857836	0.394379	-0.0127713	0.904257	0.129021	0.523826	-0.108036	0.0751398	non-dropout
SREBF2	16	127	-0.123576	0.0925557	0.00575162	0.953175	0.0913847	0.628063	-0.989438	2.94108e-68	non-dropout
SMAD1	3	33	-0.0234478	0.807108	0.102369	0.248551	-0.0245852	0.922821	-0.699058	1.17244e-17	non-dropout
SMAD2	3	23	0.0944165	0.230386	-0.171599	0.0529637	0.374548	0.0240667	-0.265303	8.78021e-05	non-dropout
SMAD4	6	87	-0.099149	0.129101	-0.184136	0.0217772	0.0631882	0.769142	0.17521	0.00278532	non-dropout
IRF4	2	0	-0.269668	0.000238887	0.0639333	0.504445	0.00355757	0.988703	1.92501	8.5655e-239	non-dropout
HIVEP2	16	6765	-0.965023	1.42987e-25	0.230681	0.000703136	-0.783371	9.36792e-09	0.121465	0.0360878	non-dropout
CNBP	8	2840	-0.199213	0.000260131	-0.231587	0.00109679	-0.390848	0.00962509	-0.486846	3.29494e-19	non-dropout
TCF12	12	60	-0.11988	0.051472	0.202964	0.00162308	-0.114467	0.531156	0.207085	0.000287969	AF9 specific
IRF8	6	143	-0.0913552	0.251571	0.173143	0.0546726	0.115551	0.555396	0.934156	4.9895e-52	AF9 specific
CBFB	16	855	-0.100794	0.289133	-0.133623	0.115561	-0.273466	0.119932	-0.487238	4.06234e-12	AF9 specific
KLF9	8	127	-0.654084	7.41465e-31	-0.680893	2.54073e-14	-0.0574524	0.789636	-0.669856	2.45637e-31	non-dropout
BHLHE41	9	0	-0.906837	1.24056e-15	-0.456481	1.21338e-05	-0.0329592	0.894401	-0.95636	5.69438e-36	non-dropout
FOXJ3	5	143	-0.0731396	0.286591	-0.101241	0.201147	0.0981801	0.615776	-0.0123808	0.85389	non-dropout
ADA	1	0	-0.421082	3.36967e-05	-0.487805	1.98153e-06	0.0326079	0.906619	-1.10883	3.75224e-13	non-dropout
GNPDA1	5	0	1.28483	0.000313044	0.38294	0.352531	-1.63998	0.000728227	NA	NA	non-dropout
SNHG8	1	0	-0.214189	0.000791824	-0.0562715	0.620345	-0.549018	0.00131372	0.500643	2.74883e-13	NA
TMEM170B	10	0	-0.339425	0.00899901	0.266741	0.128871	0.645825	0.0150215	0.495175	0.002888	non-dropout
TMPO-AS1	6	0	-0.64826	1.98723e-14	-0.172742	0.0408241	-0.194716	0.411262	-0.224448	0.0093065	NA
ZNF730	1	0	-0.210783	0.0393727	-0.489173	2.53622e-07	0.320498	0.139131	0.466599	1.54336e-09	non-dropout
HDAC6	2	0	0.238647	0.00334472	0.126461	0.267888	0.189426	0.38886	0.0461197	0.715158	non-dropout
HDAC5	8	0	-0.152154	0.0416871	0.165246	0.0580944	-0.151259	0.442555	-0.0424349	0.597305	non-dropout
PDCD6	2	0	0.172823	0.0187386	0.0439276	0.676375	-0.0147175	0.954396	0.310666	3.44162e-05	non-dropout
BCL2L11	3	0	0.294437	7.36074e-05	-0.111625	0.106625	0.0978744	0.594305	1.55087	1.22916e-170	non-dropout
SH2B3	11	0	-0.172104	0.00387542	-0.372288	1.91645e-08	0.140925	0.416805	-0.832733	7.39539e-40	non-dropout
FRAT1	4	0	-0.674556	4.8821e-21	0.0321572	0.830638	-0.415822	0.0813988	1.26472	6.1966e-32	non-dropout
TROAP	2	0	-0.191804	0.0255599	-0.112554	0.299925	-0.214027	0.273811	0.267622	0.000829469	non-dropout
MIR1296	1	0	-0.463305	0.0172361	0.0312948	0.943985	0.112256	0.769374	0.248009	0.132013	NA
MIR1204	1	0	-0.493447	0.0488885	0.202679	0.547574	-0.239413	0.587051	-1.00546	4.91989e-05	NA
FTX	1	0	0.356731	0.000321353	0.00594289	0.970383	0.0975981	0.753135	-0.204889	0.135779	NA
TOM1	10	0	0.5593	8.7819e-11	0.70683	4.18813e-12	0.0733402	0.794158	-0.134873	0.509551	non-dropout
SH2D3A	1	0	0.99337	0.000404089	0.451469	0.225074	-0.42877	0.446409	NA	NA	non-dropout
RANBP9	3	0	-0.27962	4.91182e-05	-0.253075	0.000525411	0.0806824	0.693405	0.220072	0.000154731	non-dropout
MIR3679	1	0	-0.278131	0.0281481	-0.19892	0.316246	-0.687643	0.0312592	-0.698659	0.000242945	NA
RUNX1	1	0	-0.719582	3.25934e-47	0.106548	0.0917954	-0.331148	0.0284662	0.100256	0.0556349	AF4 & AF9
TRG-AS1	1	0	0.381321	0.0286296	-0.693101	0.000145829	-0.150323	0.629776	-0.730083	6.95424e-05	NA
SENCR	1	0	-0.894631	0.00701522	0.176902	0.645956	-0.108326	0.877389	-1.88333	7.86079e-05	NA
SMC4	17	0	-0.54451	8.03863e-13	-0.310867	2.98995e-06	-0.116518	0.585807	0.248546	9.05315e-07	non-leukemia-specific dropout
GJC1	1	0	-0.476866	4.10044e-14	-0.421223	8.88785e-10	-0.0719449	0.738153	-0.265633	1.27726e-05	non-dropout
KLRK1	1	0	-0.613576	5.01276e-05	0.368734	0.00348	-0.217249	0.505652	-0.12729	0.533418	non-dropout
SAE1	7	0	-0.184783	0.00343421	-0.120088	0.204605	-0.0518718	0.809819	-0.118005	0.106975	non-leukemia-specific dropout
ABCC5	2	0	0.328501	2.1243e-06	0.0195346	0.877045	-0.16894	0.382868	0.615028	7.70783e-13	non-dropout
ABCB6	3	0	0.326133	0.000957867	-0.0875361	0.551904	-0.26881	0.267735	0.423397	0.000125224	non-dropout
SCAMP3	4	0	-0.285474	0.000503277	0.149896	0.179279	-0.517376	0.00762719	0.933975	1.26683e-20	non-dropout
IL18BP	1	0	0.267231	0.000714833	0.427646	8.70285e-06	0.181667	0.396659	0.226199	0.0596948	non-dropout
TSPAN32	3	0	1.12083	0.000327939	0.299004	0.557408	0.956578	0.0891419	NA	NA	non-dropout
ATP9A	3	0	-1.28078	8.37622e-06	0.785219	0.00137205	1.49158	0.0116177	NA	NA	non-dropout
PDCD7	3	0	-0.176753	0.0171919	-0.147845	0.0528874	-0.0167559	0.949654	0.326685	9.04087e-06	non-dropout
GPC6	2	0	-1.02749	2.44891e-11	-0.42663	0.00578427	0.38864	0.0918248	0.46776	6.33925e-06	non-dropout
EDIL3	5	0	-0.927426	0.00211441	1.12932	0.000210679	1.46588	5.77291e-05	NA	NA	non-dropout
UST	5	0	0.452317	2.68348e-06	1.38225	2.45244e-30	2.04904	3.97509e-20	0.222562	0.127535	non-dropout
ACTR3	3	0	0.138495	0.0234172	-0.171822	0.0246957	0.0166399	0.944243	-1.03465	1.56823e-86	non-leukemia-specific dropout
TSPAN5	2	0	-0.949929	9.16966e-10	0.00569376	0.987749	0.899552	0.00189934	0.512562	0.0131144	non-dropout
PPIF	2	0	-0.192095	0.0040753	-0.179771	0.0518478	-0.693005	1.80304e-05	0.0429397	0.495307	non-dropout
KIF20A	6	0	-0.650765	1.7386e-18	-0.313849	1.79481e-05	-0.184932	0.366067	0.41611	4.84696e-09	non-dropout
HIPK3	14	0	-0.678178	1.21282e-26	-0.31157	9.57731e-07	-0.420772	0.00936641	-0.227331	4.3134e-05	non-dropout
FEM1B	5	0	-0.191529	0.00138332	-0.19428	0.0040081	-0.0694224	0.733171	0.0657746	0.276453	non-dropout
ACTR1A	5	0	0.159543	0.0476041	-0.0578889	0.623216	-0.0710403	0.739888	-0.30225	3.70252e-05	non-dropout
ARL4C	1	0	1.00503	1.21757e-13	-0.333522	0.0570108	1.18589	0.000682269	-0.766334	0.000817494	non-dropout
ZNF263	3	0	-0.16447	0.00965206	-0.041787	0.669944	-0.347184	0.0381312	0.167383	0.0108324	non-dropout
TRAP1	3	0	0.292753	3.9052e-05	0.380766	3.99651e-05	-0.099	0.664382	0.166981	0.0849364	non-dropout
OPTN	2	0	0.406583	0.000558928	-0.0394873	0.874499	-0.151299	0.700117	-0.455487	0.0119261	non-dropout
NAMPT	8	0	0.201178	0.0184869	-0.333304	0.000465008	0.116329	0.610542	1.1181	3.33278e-70	AF4 & AF9
TOB1	1	0	-0.159048	0.0311991	0.568166	1.33858e-06	0.045583	0.841592	2.12278	4.22822e-236	non-dropout
PLXNC1	14	0	-1.21276	2.22113e-45	1.32549	3.03447e-74	-1.00572	1.08885e-10	-0.0508414	0.561812	non-dropout
FARP1	1	0	0.309424	0.000188435	0.802593	2.42196e-21	0.753839	3.55879e-05	0.200579	0.0318308	non-dropout
LPAR6	6	0	-0.969768	2.71118e-37	-0.0639458	0.584941	-0.84231	1.80262e-06	-0.671268	2.86745e-25	non-dropout
ZNF256	3	0	-0.231298	0.00213308	-0.0736761	0.468412	-0.448301	0.00943636	0.00888453	0.912847	non-dropout
CNIH1	4	0	-0.217773	0.0103834	-0.31334	0.00191388	-0.162198	0.444868	0.112135	0.122266	non-dropout
STAG3L5P-PVRIG2P-PILRB	1	0	0.239668	0.00406552	0.469127	1.65452e-11	0.153524	0.443388	0.680332	4.07656e-18	NA
ANKRD44-IT1	1	0	1.00137	2.09806e-16	0.361357	0.147279	1.90821	1.08084e-14	-0.597193	0.00422484	NA
LAMP5-AS1	1	0	-1.54051	6.56457e-41	-0.365297	0.0159135	-0.584297	0.0179249	-1.26789	1.70029e-14	NA
LINC01585	1	0	0.362626	0.0496013	-0.365266	0.0871835	0.158244	0.708702	-3.16588	1.44667e-20	NA
TSHZ1	31	0	-0.679147	1.20484e-19	-0.0334543	0.776783	-0.560812	0.00574493	-0.183168	0.0510657	non-dropout
MPHOSPH9	2	0	-0.13223	0.0495854	-0.0461017	0.644511	0.12255	0.520954	0.0701062	0.276865	non-dropout
ADAM10	17	0	-0.258865	0.000971235	-0.237863	0.00123334	0.147078	0.425348	-0.0925326	0.101523	non-dropout
EIF1	3	0	-0.253137	9.8275e-06	-0.131464	0.112836	-0.438023	0.00425732	0.709005	1.93945e-32	non-dropout
CDK6	11	0	-0.864495	1.02817e-34	0.00990493	0.909092	-1.25136	2.7101e-22	0.126498	0.0152519	non-leukemia-specific dropout
PSMD14	5	0	0.503859	5.49892e-13	-0.0985269	0.285287	0.0549275	0.807049	0.141096	0.0915117	non-dropout
CTDSPL	2	0	-0.599414	0.000573337	-0.010353	0.964618	-0.017807	0.961753	-0.282777	0.0655867	non-dropout
GDF11	4	0	0.347701	1.5492e-05	0.740217	7.62996e-18	0.074492	0.733171	1.30502	3.31743e-55	non-dropout
TRIB1	8	0	-0.603548	2.65401e-13	0.811346	1.23786e-18	-0.0792926	0.70534	0.138032	0.0447236	non-dropout
CD96	2	0	0.477869	4.68484e-17	-0.00541029	0.969558	0.493613	0.00404827	-0.384805	1.22026e-07	non-dropout
PLIN3	2	0	0.226703	0.00342797	0.154416	0.201816	-0.0840516	0.731228	-0.417511	8.61368e-05	non-dropout
MFSD10	3	0	0.235303	0.0460532	-0.177567	0.148068	-0.31214	0.162442	-0.992103	2.06796e-28	non-dropout
STX6	4	0	0.347881	1.15542e-09	0.229193	0.00110552	0.287522	0.0989207	-0.299538	2.5835e-05	non-dropout
RASGRP2	5	0	0.242124	0.00762518	0.761824	1.10501e-09	0.934161	8.35417e-08	-1.80847	9.07705e-42	non-dropout
CALCOCO2	7	0	-0.255639	0.000625349	0.181032	0.0533263	0.0470947	0.856165	-0.0379054	0.672331	non-dropout
KCNMB2	1	0	0.565085	0.000571493	-0.0107529	0.977851	3.59468	1.35811e-25	0.0394936	0.919586	non-dropout
GPHN	9	0	0.166804	0.0378137	0.12458	0.225061	-0.103927	0.621409	0.293852	2.69076e-05	non-dropout
MIR6774	1	0	-0.533103	0.0406977	-0.205337	0.605487	0.0849521	0.882009	0.521045	0.0611521	NA
POP7	1	0	-0.209061	0.0429987	-0.254364	0.0398704	-0.646274	0.000317883	0.196751	0.0506823	non-dropout
SPRY2	28	0	-0.696077	1.5186e-31	-0.582293	5.99383e-12	-0.834395	7.81262e-09	-0.292691	8.04434e-07	non-dropout
STAM2	4	0	0.178291	0.0336966	-0.238826	0.0508685	0.344397	0.0701475	0.122089	0.162059	non-dropout
CDKN1A	6	0	-0.459339	1.96553e-12	-0.589202	4.51601e-13	-0.313717	0.0572697	0.516313	3.79928e-18	non-dropout
CDKN1B	1	0	-0.622269	2.48825e-30	0.0641747	0.529602	-0.529343	0.000772536	0.0206979	0.760308	non-dropout
FSTL3	2	0	-0.300195	0.00973778	0.376985	0.0207174	-0.516664	0.0723278	-0.786438	0.000137934	non-dropout
NET1	8	0	-0.159114	0.0265239	-0.330999	2.05052e-05	-0.0973718	0.643218	0.00873953	0.910579	non-dropout
UBE4B	6	0	0.37341	5.90412e-09	0.303	2.40732e-05	0.143224	0.462253	0.178628	0.040566	non-dropout
SIGMAR1	3	0	-0.255842	8.04873e-05	-0.0621047	0.577958	-0.503523	0.00858166	0.676442	2.22498e-20	non-dropout
CWC27	9	0	0.332493	8.45564e-06	-0.0678122	0.58931	0.0469219	0.86943	-0.563004	4.955e-12	non-dropout
CDKN2A	2	0	-0.370838	4.34257e-07	0.0162168	0.895323	-0.584749	0.000462742	0.0915317	0.322387	non-dropout
BCKDK	3	0	-0.236628	0.00606032	0.34806	0.00218089	-0.281635	0.250371	-0.307977	0.0108692	non-dropout
2006-03-01	3	0	0.158939	0.00773887	-0.0389369	0.660054	0.137491	0.452405	-0.326318	4.36213e-08	non-dropout
CDKN2C	19	0	-0.921224	7.08516e-44	0.0915674	0.30742	-0.322744	0.0656244	0.306794	8.12203e-05	non-dropout
CDKN2D	12	0	-0.307469	0.00477174	-0.0825107	0.562933	-0.508774	0.0428534	-0.336953	0.0001006	non-dropout
RRAGB	5	0	0.250495	0.00641473	0.149285	0.291408	0.386636	0.0663838	-0.372484	0.00819194	non-dropout
AKR1A1	2	0	-0.316388	2.44903e-05	0.41844	8.07795e-10	-0.513156	0.000971218	-0.770367	9.92967e-25	non-dropout
CDKN3	3	0	-0.479804	1.0388e-06	-0.338613	0.000714477	-0.0777008	0.805393	0.890893	1.16994e-17	non-dropout
TLR6	1	0	0.63781	1.71865e-19	-0.179751	0.124418	1.7731	9.42845e-24	-1.4552	4.71134e-29	non-dropout
MRVI1	1	0	-1.80968	1.4658e-08	-0.569771	0.159403	2.33937	5.88604e-06	NA	NA	non-dropout
TRIM22	1	0	0.285786	0.000406355	-0.109214	0.315326	0.301155	0.147292	-1.22723	7.69771e-29	non-dropout
ABCA7	3	0	0.935299	6.88549e-13	0.254791	0.16716	0.560462	0.0267141	1.16503	5.02385e-16	non-dropout
WARS2	3	0	0.267561	0.000880454	-0.141487	0.254726	0.322896	0.112322	-0.267582	0.00396608	non-dropout
HMG20A	9	0	0.255387	9.28457e-05	0.0423624	0.703586	0.233527	0.21941	-0.328977	0.00163068	non-dropout
CITED2	2	0	-0.396282	1.21741e-08	0.861001	2.061e-19	-0.189627	0.379741	1.35135	1.70135e-64	AF9 specific
SEMA3A	7	0	-0.269524	8.47236e-05	0.146254	0.0457394	0.0904611	0.66165	0.270759	2.15492e-06	non-dropout
TUBA1B	4	0	-0.247601	6.54181e-06	-0.16451	0.0544648	-0.395605	0.0209599	0.275911	9.96162e-07	non-dropout
TUBB4B	8	0	-0.22635	0.00241962	0.004126	0.974732	-0.638289	0.000129139	1.43308	1.23228e-115	non-dropout
CDR2	4	0	-0.465289	4.50569e-10	0.507558	1.75865e-11	-0.410018	0.0245434	1.05644	9.09518e-43	non-dropout
DLC1	3	0	-0.696174	5.11136e-06	0.00851055	0.966882	0.513057	0.0370437	2.82773	3.97886e-258	non-dropout
ATP8A1	2	0	-0.252452	2.90828e-05	0.556503	4.59997e-14	-0.176785	0.329781	0.370843	4.95526e-10	non-dropout
NDRG1	1	0	0.228092	0.000532324	0.370843	2.32749e-07	0.357705	0.0541927	1.12774	3.02272e-74	non-dropout
ADARB1	3	0	-0.375176	3.74838e-05	1.0405	6.65872e-30	0.178991	0.376521	-0.136101	0.219748	non-dropout
NDC80	4	0	-0.382649	4.76315e-06	-0.157922	0.0864041	0.220633	0.362611	-0.642078	8.64907e-15	non-dropout
CPQ	2	0	-0.525122	0.000304389	0.158341	0.45267	0.920699	0.00044765	0.091956	0.526298	non-dropout
YAP1	1	0	-0.844069	0.000456784	0.184239	0.530988	0.38242	0.361744	-0.378022	0.135198	non-dropout
PRMT5	2	0	-0.178369	0.00672256	-0.0617395	0.529967	-0.323576	0.0878171	-0.359729	2.15379e-05	non-leukemia-specific dropout
CD2BP2	2	0	0.291887	0.000534089	0.0188341	0.881196	-0.342195	0.0603649	-0.15653	0.067003	non-dropout
IFI30	2	0	0.799349	1.82635e-21	-0.964577	2.11496e-13	0.751179	0.0001486	0.816789	1.09597e-15	non-dropout
ACAA2	3	0	0.224148	0.00585736	-0.213091	0.0276952	0.0171633	0.949862	0.10979	0.231387	non-dropout
CDX2	1	0	-0.65546	0.00115491	0.106274	0.748994	0.0624428	0.900396	-0.344775	0.319264	non-dropout
VAV3	2	0	-1.15092	8.31452e-50	0.393847	6.05798e-08	-0.194299	0.369318	0.206677	0.00472664	non-dropout
ECI2	1	0	0.601813	3.34103e-09	0.347419	0.00256146	0.255621	0.267945	0.384861	0.00193096	non-dropout
HAX1	4	0	-0.235351	0.00139329	-0.108416	0.465527	-0.134108	0.570738	-0.287475	0.0255614	non-dropout
MAD2L2	3	0	0.239434	0.0214205	0.35092	0.00145811	-0.148481	0.54474	-0.323833	0.000692829	non-leukemia-specific dropout
TACC3	2	0	-0.433949	1.75295e-10	-0.0443957	0.63023	-0.158181	0.442963	0.162419	0.019605	non-dropout
MERTK	1	0	0.896549	0.00166603	0.250068	0.446627	1.14239	0.00707131	0.399411	0.145633	non-dropout
SLC30A9	3	0	0.168516	0.0236544	-0.041412	0.742564	0.247871	0.214205	0.191765	0.0114046	non-dropout
PIBF1	5	0	-0.203521	0.0430711	-0.045153	0.729466	0.138908	0.532104	0.214442	0.0234105	non-dropout
TIMM44	2	0	-0.298971	0.000111657	-0.379002	0.000133897	-0.270437	0.150022	-0.0465587	0.599511	non-dropout
SEC23B	6	0	0.18976	0.00587056	-0.0934473	0.311591	0.00754868	0.976855	-0.245535	0.00158112	non-dropout
CAP1	12	0	-0.18562	0.00196983	-0.167008	0.024537	-0.239377	0.155307	-0.360721	1.13918e-10	non-dropout
CRTAP	6	0	0.228829	0.000822322	-0.208595	0.0196092	-0.15902	0.438725	-0.289116	8.49116e-05	non-dropout
VAT1	3	0	0.829367	4.80483e-16	-0.617426	9.22089e-10	0.255118	0.293248	0.482516	8.24992e-05	non-dropout
UNC13B	3	0	-0.19896	0.00601798	-0.452973	2.15341e-09	-0.687556	4.81753e-05	0.398217	7.8565e-07	non-dropout
SEMA4F	1	0	0.250168	0.0191922	0.289136	0.0159998	0.0197458	0.949099	1.06778	1.79228e-16	non-dropout
SEMA4D	1	0	0.696836	2.63619e-22	0.290546	0.000519015	0.0760691	0.717397	-0.576469	4.09628e-16	non-dropout
SEMA4B	4	0	0.283534	0.00149921	0.0987643	0.53477	0.0466605	0.872661	0.197928	0.156554	non-dropout
CEBPB	7	0	-0.931766	4.16179e-29	-0.600073	7.00727e-05	-0.858176	1.55112e-06	0.00617305	0.953311	non-dropout
CIB1	5	0	0.385779	0.000533977	0.276269	0.0267826	-0.439963	0.0261472	0.336689	0.000109094	non-dropout
HYOU1	8	0	0.165985	0.0273271	-0.119064	0.237869	-0.44254	0.012593	1.1576	4.24294e-81	non-dropout
NOP56	2	0	-0.306925	4.64139e-08	-0.184145	0.00831388	-0.611528	0.000106053	0.574706	3.32932e-26	non-leukemia-specific dropout
PITRM1	2	0	0.163392	0.0240402	0.105971	0.269995	-0.0153692	0.950399	2.2217	2.27441e-254	non-dropout
ATG7	1	0	0.264619	0.000713925	0.171279	0.1257	0.347388	0.0681926	-0.00248311	0.982028	non-dropout
RNASEH2A	6	0	-0.22612	0.015355	-0.324652	0.0175081	-0.160222	0.495154	0.581255	2.61683e-05	non-leukemia-specific dropout
GLRX3	3	0	0.294039	0.000789371	-0.0994944	0.403457	0.102395	0.653668	-0.00012055	0.998754	non-dropout
CEBPG	4	0	-0.169644	0.00331883	-0.224146	0.00112711	0.0541184	0.7881	-0.596346	2.02161e-24	AF4 specific
ANP32B	11	0	-0.20329	0.000411923	-0.268612	0.000416071	-0.206772	0.219255	-1.12552	1.24493e-82	non-dropout
ARL6IP5	7	0	0.253371	0.0365784	0.305543	0.00301588	0.106174	0.67607	-1.14879	2.13703e-19	non-dropout
ARPC1A	4	0	-0.168905	0.0283128	-0.166142	0.0720003	-0.228697	0.257819	0.526603	6.49879e-11	non-dropout
AGPAT1	7	0	-0.252125	0.0140813	-0.250213	0.0779711	-0.340301	0.126158	0.0553361	0.694337	non-dropout
AGPAT2	10	0	-0.317647	0.000213823	0.0748241	0.624191	-0.0338648	0.904985	0.60293	2.25563e-06	non-dropout
RPP30	1	0	0.224829	0.00777979	-0.241328	0.0100647	0.131946	0.532599	-0.0177057	0.849777	non-dropout
SLC19A2	1	0	-0.285653	0.00092039	-0.341472	0.000384586	-0.0560455	0.826635	1.0903	4.32344e-55	non-dropout
ARFGEF2	5	0	0.169942	0.00523198	0.0872153	0.244044	0.125387	0.495603	-0.274274	2.73587e-06	non-dropout
CCT7	7	0	-0.140366	0.0379042	-0.279972	0.000308432	-0.408412	0.0148408	0.412294	1.20545e-12	non-leukemia-specific dropout
NPC2	3	0	0.658095	3.13059e-05	-0.0525216	0.832662	0.414506	0.22306	1.16537	1.48797e-09	non-dropout
TACC2	2	0	1.70338	2.2238e-08	1.38706	2.63942e-08	2.06012	3.21285e-06	NA	NA	non-dropout
CENPA	1	0	-0.684872	2.42743e-18	-0.399557	4.4345e-05	-0.107053	0.641896	0.0902996	0.379745	non-leukemia-specific dropout
SORBS1	1	0	0.55403	1.80551e-10	0.934823	1.92923e-36	0.820915	5.1794e-06	0.447816	1.79842e-07	non-dropout
SMC2	7	0	-0.178923	0.0448039	-0.482369	6.89156e-09	0.170164	0.411289	-0.0710315	0.220664	non-dropout
CDC42EP3	8	0	-0.362272	5.28598e-11	-0.46973	1.88398e-09	-0.0569274	0.782816	-1.36322	4.70027e-128	non-dropout
SH2B2	1	0	0.923995	3.20313e-23	0.212596	0.14733	0.259998	0.219772	0.0367644	0.759034	NA
PAICS	6	0	-0.162661	0.0129748	-0.24303	0.000720013	-0.137883	0.460794	-0.295178	2.12867e-07	non-leukemia-specific dropout
MXD4	22	0	0.220302	0.0157201	1.05029	1.14164e-26	-0.476558	0.0269194	0.717542	4.90691e-13	non-dropout
HEXIM1	9	0	0.339911	5.4604e-06	-0.445965	1.14768e-05	-0.257632	0.215591	2.56858	0	non-dropout
SPAG5	1	0	-0.238348	0.000510312	0.0449036	0.684571	-0.255123	0.161154	0.0960903	0.216658	non-dropout
ARID3B	2	0	0.36656	3.30459e-05	-0.612421	3.10445e-14	-0.5206	0.00149799	0.0162909	0.82567	non-dropout
CENPF	6	0	-0.282244	0.000392218	-0.305744	0.000677407	0.327756	0.0750644	-0.136514	0.0127957	non-dropout
NPRL2	2	0	-0.271454	0.00714501	0.142819	0.29406	-0.481589	0.0245506	0.945898	8.80904e-18	non-dropout
IGF2BP3	2	0	-0.412683	1.05499e-11	-0.0948452	0.268853	-0.377031	0.0217619	0.319378	3.08059e-06	non-dropout
CELF1	15	0	-0.191441	0.000410904	0.0910403	0.184306	-0.0781474	0.686044	-0.391822	1.44989e-12	non-dropout
CELF2	13	0	-0.18643	0.00130889	0.151613	0.0207164	-0.213021	0.199314	0.0331963	0.579801	non-dropout
CD226	2	0	1.05728	6.4379e-09	0.388157	0.0657699	0.857751	0.00289499	0.659793	0.000909055	non-dropout
DCTN6	1	0	0.212294	0.0219498	-0.0857928	0.468747	-0.0135011	0.961906	-0.565182	3.38316e-12	non-dropout
B3GNT2	7	0	-0.342029	3.87691e-08	0.0488264	0.601339	-0.157431	0.388953	0.359256	3.48656e-09	non-dropout
GNB5	1	0	0.225231	0.0458094	-0.18227	0.119309	0.0953493	0.705661	-0.255012	0.00830755	non-dropout
EBP	2	0	-0.25494	0.0055945	-0.336252	0.00420846	-0.517941	0.0038145	0.701421	5.61404e-14	non-dropout
CCT8	2	0	-0.136702	0.0252728	-0.229491	0.000944561	-0.239417	0.156488	0.0321332	0.620493	non-dropout
CETN3	2	0	-0.444503	2.48226e-05	-0.397627	0.00590033	0.238932	0.393807	-0.15576	0.327364	non-dropout
FAM189B	2	0	-0.250292	0.0314436	-0.110231	0.528263	-0.307009	0.238809	-0.555118	0.000650302	non-dropout
POLD3	2	0	-0.168902	0.0250136	-0.415846	3.99917e-07	0.130856	0.486618	-0.526534	7.67114e-12	non-leukemia-specific dropout
AP4B1	1	0	0.361471	8.16624e-08	-0.282746	0.00270708	0.0382855	0.874809	0.00525439	0.958117	non-dropout
SLC12A7	1	0	0.263168	0.00303666	0.54946	2.27553e-11	-0.0437444	0.863405	-0.161661	0.0391923	non-dropout
MGEA5	4	0	0.208187	0.000201285	0.0805215	0.343292	0.373211	0.0310526	0.67295	8.16447e-34	non-dropout
NFAT5	9	0	0.186947	0.0255266	1.13444	7.86191e-42	0.419089	0.0216985	0.415664	2.63387e-10	non-dropout
PLK4	5	0	-0.287176	8.7732e-05	-0.463776	1.29512e-12	-0.0174295	0.947905	-0.565609	4.51117e-22	non-leukemia-specific dropout
PHTF1	4	0	0.772757	1.89357e-24	-0.0127597	0.928635	0.137024	0.57256	0.816947	1.46894e-25	non-dropout
CTSC	5	0	-0.188394	0.00369998	-0.0983083	0.258954	-0.363884	0.0226945	0.124722	0.0719137	non-dropout
NUP50	5	0	-0.204276	0.000636323	-0.258345	3.42748e-05	-0.00560635	0.981694	-0.455578	1.46539e-16	non-dropout
KDM5B	8	0	0.70469	0.000256153	3.20315	1.69189e-09	NA	NA	NA	NA	non-dropout
TOB2	10	0	-0.179715	0.0155849	-0.0365172	0.833356	-0.442646	0.00974368	1.35133	2.1142e-113	non-dropout
HBS1L	8	0	0.20584	0.0189743	-0.189241	0.0411879	0.252329	0.210055	-0.0306661	0.665126	non-dropout
PLK2	2	0	0.938213	8.22215e-14	-0.0225407	0.914816	0.655726	0.00763688	2.5516	5.0481e-159	non-dropout
ZBTB6	1	0	-0.197879	0.0280529	-0.278539	0.00154601	-0.0556793	0.796669	-0.47655	2.53311e-14	non-dropout
ARPP21	2	0	-0.522131	6.73043e-27	0.00710281	0.937894	-1.0957	3.05388e-15	-0.939929	6.45833e-63	non-dropout
ZNF274	9	0	-0.311538	0.00107328	-0.063877	0.612445	0.0726301	0.796154	-0.985215	1.16693e-19	NA
NEK6	5	0	-0.359374	1.36484e-06	-0.169925	0.0519519	0.149204	0.434596	-0.591004	1.02559e-15	non-dropout
MTHFD2	3	0	-0.362908	2.02589e-10	-0.667115	1.3278e-25	-0.167327	0.336345	0.557134	5.02082e-23	non-dropout
CYSLTR1	2	0	-0.799845	2.06563e-12	-0.763503	2.59826e-05	0.227634	0.50478	-1.0796	2.54243e-09	non-dropout
SDCCAG8	3	0	0.279811	0.0102571	0.178328	0.121323	0.509563	0.0110945	0.468112	1.2612e-05	non-dropout
SDCCAG3	5	0	-0.178176	0.0250027	0.0521674	0.599354	-0.452848	0.0157832	-0.0536139	0.517608	non-dropout
PPP1R13L	2	0	-0.463973	0.000102847	-0.217589	0.23612	0.0477964	0.894428	0.131828	0.421115	non-dropout
CD3EAP	1	0	-0.274794	0.00226612	-0.473942	0.000124726	-0.504892	0.00428182	0.422193	9.00873e-08	non-dropout
ADAM28	1	0	0.831033	7.85749e-25	-0.750544	1.26396e-12	1.2605	5.01814e-12	-0.859015	1.61606e-16	non-dropout
ARID5A	6	0	-0.491692	8.78686e-16	0.405658	1.58004e-06	-0.765922	1.90606e-06	0.699288	1.92806e-27	non-dropout
USP20	2	0	0.419179	3.67054e-08	0.155777	0.123526	-0.0937036	0.683604	0.62092	8.2474e-13	non-dropout
WDR3	4	0	-0.150929	0.038367	-0.262033	0.000190035	-0.0208459	0.929363	0.14258	0.0201927	non-leukemia-specific dropout
GPR83	1	0	0.323662	0.0430711	0.100675	0.659946	0.162648	0.621544	0.202261	0.340938	non-dropout
RAB10	5	0	-0.213019	0.00332041	-0.213878	0.012243	-0.0798138	0.707699	0.388071	1.98087e-07	non-leukemia-specific dropout
PPARGC1A	1	0	1.28978	2.34206e-05	1.44519	0.001152	NA	NA	NA	NA	non-dropout
MALT1	6	0	-0.164784	0.0309597	-0.338381	5.2603e-05	-0.073285	0.749288	-0.239563	0.00261637	non-dropout
ADCY3	4	0	-0.207216	0.00140103	0.177925	0.0391243	-0.246979	0.173504	-0.319328	1.29966e-05	non-dropout
BLCAP	9	0	0.367133	2.3415e-05	0.138493	0.18742	-0.066272	0.778597	0.569132	1.11228e-12	non-dropout
TRAFD1	5	0	0.470183	7.89454e-13	-0.0436911	0.717597	-0.247416	0.190895	1.60762	6.87657e-107	non-dropout
RNPS1	11	0	-0.181496	0.00998484	-0.192407	0.015153	-0.409322	0.00965364	0.192596	0.00434277	non-dropout
DBF4	1	0	-0.309371	0.00176146	-0.204925	0.0342932	-0.217909	0.27502	0.407464	3.2201e-12	non-dropout
SPIN1	6	0	0.216309	0.000244945	-0.135921	0.0630051	0.205336	0.241546	-1.06217	1.85626e-64	non-dropout
EHD1	2	0	0.568456	2.19326e-17	0.434812	0.00106124	0.250706	0.228503	1.8512	4.69317e-127	non-dropout
BTG3	3	0	-0.34278	2.33065e-07	-0.371168	9.60925e-07	-0.347902	0.0454213	-0.0635459	0.333515	non-dropout
SERINC3	2	0	0.22381	0.0010563	0.0800005	0.348545	0.331413	0.0835844	-0.215287	0.00247769	non-dropout
ERP29	2	0	0.239711	0.000429139	-0.0658612	0.466996	0.176997	0.347337	0.0726807	0.513501	non-dropout
MLLT11	1	0	1.72798	1.72075e-28	-0.749593	6.71044e-07	-0.485454	0.0844616	-0.422805	0.000560191	non-dropout
RAB40B	2	0	0.520527	1.16214e-06	0.460013	0.0128948	0.0380676	0.929363	0.208327	0.456992	non-dropout
TMED10	12	0	0.150134	0.0175414	-0.0728192	0.442773	0.100965	0.642679	-0.295734	5.84411e-05	non-leukemia-specific dropout
CLP1	6	0	-0.364502	1.33279e-06	-0.0511869	0.663399	-0.398574	0.0443636	0.301353	0.000770729	non-leukemia-specific dropout
FERMT2	12	0	-0.423318	2.13304e-06	-0.643594	1.31154e-05	0.405848	0.128757	-0.704189	2.70331e-10	non-dropout
MAPRE2	7	0	0.150438	0.0414612	-0.0950738	0.243504	0.127194	0.514247	0.568904	2.16002e-21	non-dropout
SLC27A3	3	0	-0.806412	1.84358e-14	-0.1715	0.13446	-0.874252	6.58703e-05	-2.40837	2.57215e-97	non-dropout
SLC27A2	2	0	-0.972063	5.78832e-17	1.17444	4.80216e-34	-0.394183	0.0692185	-1.55922	3.62366e-16	non-dropout
KIF2C	5	0	-0.143484	0.0399593	-0.289537	9.15004e-05	-0.159659	0.394556	0.537131	1.90947e-18	non-dropout
LILRB4	3	0	1.29652	4.39919e-09	2.16894	1.92262e-16	3.96629	2.30057e-28	NA	NA	non-dropout
CCDC85B	3	0	-0.382408	0.000625444	-0.214952	0.0966322	-1.02214	5.74857e-08	0.743307	4.73793e-12	non-dropout
GLIPR1	4	0	0.568701	7.43055e-07	-0.902309	3.5686e-13	1.13132	3.34366e-11	-1.25096	1.74837e-59	non-dropout
RCBTB2	3	0	-0.510589	2.52943e-12	0.24236	0.00378545	0.0740851	0.750827	-0.529913	3.75627e-13	non-dropout
LILRA2	1	0	-0.370491	0.00392904	0.570986	1.16501e-08	0.601385	0.0147196	-3.9556	7.05255e-121	non-dropout
RAB31	1	0	0.331607	0.00346871	-0.230892	0.328863	1.22101	4.62232e-06	0.324953	0.0901492	non-dropout
STON1	3	0	0.404433	0.000415199	0.527006	9.86718e-06	0.482271	0.0784413	-0.272699	0.0486414	non-dropout
RCC1	4	0	-0.257842	2.94566e-05	-0.180811	0.0310831	-0.268058	0.114904	-0.195808	0.00232693	non-leukemia-specific dropout
PIM2	10	0	0.232896	0.0129874	0.495269	1.72798e-06	0.141878	0.572979	2.57596	1.13003e-180	non-dropout
B4GAT1	4	0	-0.479376	0.000148305	-0.163512	0.450829	-0.774788	0.00396807	-0.661431	0.00405365	NA
MID2	3	0	-0.477803	0.00916418	2.07159	2.4468e-10	2.36219	1.11112e-13	-0.222678	0.400241	non-dropout
PAPD7	2	0	-0.158386	0.00996076	-0.135627	0.0595162	-0.0767391	0.710522	0.34709	1.24125e-07	non-dropout
ADRM1	11	0	0.292726	0.000622548	-0.0614576	0.631652	-0.595577	0.00188987	0.133515	0.0922096	non-leukemia-specific dropout
DDX52	1	0	0.234108	0.000355209	-0.0654263	0.459396	0.193907	0.297741	0.180691	0.00381525	non-leukemia-specific dropout
UBE2C	3	0	-0.51997	1.77136e-11	-0.0676264	0.559145	-0.319909	0.112971	-0.103237	0.262116	non-leukemia-specific dropout
C10orf10	2	0	-0.314836	0.00676171	-0.162887	0.309212	0.0757778	0.852549	0.711092	7.10371e-08	non-dropout
RAPGEF4	1	0	-0.755541	7.89169e-12	0.193015	0.423731	0.145569	0.719362	0.154815	0.51066	non-dropout
CHD3	4	0	0.238179	0.00154723	0.358022	1.82407e-07	-0.169435	0.361251	-1.13072	8.55681e-40	non-dropout
DUSP14	3	0	-0.180085	0.0227983	0.0916529	0.368872	-0.670339	0.000155357	1.44977	2.42574e-75	non-dropout
DIDO1	5	0	-0.136761	0.0138939	0.170191	0.0117851	-0.0793853	0.676219	-0.638939	3.3951e-25	non-dropout
WDR5	5	0	-0.192379	0.0019124	-0.161807	0.0522721	-0.283554	0.117448	0.0471161	0.501946	non-dropout
PRDM5	1	0	0.840445	4.92411e-06	-0.305113	0.218621	1.21644	0.000177923	0.0855212	0.720401	non-dropout
CIT	1	0	-0.22959	0.00072601	-0.0964612	0.171603	0.0297516	0.900486	0.17467	0.00959678	non-dropout
EMILIN1	2	0	-0.532258	4.80834e-12	-0.243152	0.0546867	-0.731911	0.000318342	-1.91451	2.89098e-52	non-dropout
FOXN3	10	0	-0.189283	0.00309927	0.270524	0.000380927	0.157116	0.4314	-0.0400606	0.598867	non-dropout
RCAN3	1	0	0.289243	0.00196466	0.467776	0.000648429	0.93293	4.20497e-05	-0.234197	0.158041	non-dropout
KPTN	1	0	0.356063	0.0457105	0.392712	0.0186461	-0.202483	0.525647	-0.607177	0.00546498	non-dropout
TBC1D8	3	0	-0.174455	0.00287359	0.18766	0.00912292	-0.291361	0.0941534	0.230336	0.000411942	non-dropout
KAT7	4	0	-0.38657	1.1641e-11	-0.122521	0.0943783	-0.344825	0.0271918	-0.566042	1.02403e-25	AF9 specific
GLMN	1	0	-0.282021	0.0171647	-0.172233	0.137714	0.281952	0.241262	0.864938	1.54837e-21	non-leukemia-specific dropout
BVES	5	0	-0.245548	0.0216788	-0.438761	0.000315893	0.424372	0.033247	0.676553	6.93387e-16	non-dropout
AP4S1	1	0	0.331211	0.000249669	0.393599	0.001792	0.137374	0.57256	-1.00259	1.14753e-18	non-dropout
LDB3	1	0	0.819006	0.00126922	0.13051	0.654555	1.69516	5.28261e-06	-1.61457	8.3601e-07	non-dropout
ERLIN2	7	0	0.175065	0.0225594	0.199929	0.0253021	0.198357	0.328327	-0.267013	0.000287026	non-dropout
NUDT4	1	0	-0.32561	1.84075e-05	-0.128639	0.172238	-0.148084	0.463637	1.07047	3.89519e-62	non-dropout
FSTL1	1	0	-1.12824	1.56051e-14	-0.0861668	0.796287	0.695597	0.0626227	1.0857	5.49061e-08	non-dropout
PSIP1	8	0	-0.316698	7.3514e-06	-0.355099	5.47597e-06	0.111314	0.622077	0.447747	7.67081e-15	non-dropout
ADAMTS6	2	0	0.411428	4.73585e-09	0.152539	0.170755	0.32025	0.119707	0.316866	6.87919e-05	non-dropout
BAZ2A	6	0	0.236448	0.000288205	0.258042	0.000464373	0.0461571	0.822617	-0.411556	2.73495e-10	non-dropout
WDR6	3	0	0.197015	0.00356055	0.0532003	0.562799	-0.339723	0.0434145	0.254451	1.55858e-05	non-dropout
RASSF1	11	0	-0.219445	0.00282242	-0.177676	0.0542498	-0.294084	0.113668	-0.0239686	0.752506	non-dropout
ADCY6	2	0	-0.216843	0.000215483	-0.191336	0.0494351	-0.119117	0.563845	-1.47692	6.40599e-90	non-dropout
CHEK2	7	0	-0.459458	1.14422e-05	-0.433345	0.000317802	0.352569	0.112834	0.691286	1.03832e-12	non-dropout
POLI	1	0	0.296939	0.00921496	-0.370996	0.00199008	0.732877	0.000123743	-0.951717	1.44496e-17	non-dropout
CHM	3	0	0.196493	0.0221684	-0.00376524	0.97661	0.343082	0.0991849	0.0015949	0.987248	non-dropout
IRAK3	2	0	-0.50144	3.1248e-15	-0.0447286	0.721814	-0.0770231	0.748379	-0.362054	1.95543e-07	non-dropout
GALNT6	3	0	-0.446555	9.48061e-09	-0.381102	1.67471e-05	0.168776	0.399332	-1.13763	3.78189e-41	non-dropout
RASSF8	7	0	-0.496384	5.61175e-06	0.255764	0.0476082	1.48746	9.69489e-12	-0.0647707	0.697302	non-dropout
RNF139	3	0	-0.289892	1.01806e-05	-0.013238	0.900093	-0.194513	0.284107	0.156085	0.00762743	non-dropout
RNF24	3	0	0.391207	5.61877e-11	0.378085	2.93188e-06	0.476456	0.00618061	0.367178	2.57135e-05	non-dropout
PMF1	7	0	0.360767	0.00730532	-0.017935	0.933109	0.30402	0.226769	-0.20321	0.170581	non-leukemia-specific dropout
PACSIN2	1	0	-0.129848	0.0447874	-0.12643	0.0988951	-0.138764	0.455646	0.481776	1.22202e-11	non-dropout
MAN1B1	3	0	0.215098	0.0115957	0.0970864	0.436424	0.131437	0.604564	0.423069	0.0117435	non-dropout
SNX18	2	0	-0.404869	3.20377e-09	-0.183931	0.0305831	-0.353415	0.0456779	0.742133	8.11391e-29	non-dropout
FILIP1L	9	0	0.20772	0.0285307	0.236209	0.183257	-0.109866	0.795644	0.198182	0.187284	non-dropout
MIR4435-2HG	1	0	0.612798	0.000673938	-0.260924	0.416532	0.379938	0.222684	-2.21561	1.28308e-26	NA
XPOT	1	0	-0.349335	3.05558e-07	-0.340345	1.34964e-05	0.127173	0.51387	-0.619586	1.49042e-23	non-dropout
CHP1	8	0	0.163765	0.0467516	0.112208	0.306513	-0.0386314	0.884707	0.231985	0.00191504	non-dropout
CMTM7	5	0	0.34665	0.0100789	1.66966	1.54584e-29	0.215278	0.41815	-0.966473	1.2738e-05	non-dropout
DDX19B	6	0	0.195149	0.0319687	-0.266919	0.00931999	0.0866102	0.714474	-0.388662	3.61364e-05	non-dropout
NRM	3	0	-0.25518	0.00415693	-0.295779	0.0027105	-0.304851	0.157784	-0.351605	2.33397e-06	non-dropout
IFT43	1	0	0.711531	0.00112028	0.378434	0.144668	0.0288724	0.960516	-0.124233	0.733618	non-dropout
SYNRG	10	0	0.172725	0.00370447	0.229186	0.000976208	0.164313	0.35903	-0.0625894	0.414179	non-dropout
WDR89	4	0	-0.173102	0.0374568	-0.249747	0.0129485	0.123859	0.546006	-0.484545	2.88028e-09	non-dropout
VPS26B	1	0	0.422684	8.22025e-05	0.895537	1.57544e-20	0.163112	0.552589	-0.197361	0.233739	non-dropout
CFAP36	1	0	0.410358	0.01982	-0.115801	0.6417	0.243795	0.438928	-0.153148	0.476844	NA
ADCY7	1	0	0.151253	0.0385376	0.202696	0.0164716	0.820071	2.57153e-08	-1.20298	9.57197e-59	non-dropout
LYST	6	0	0.427858	2.34139e-05	-0.520001	1.1263e-08	1.02881	6.70622e-10	-0.33321	1.65629e-05	non-dropout
CDCA5	1	0	-0.271308	0.000251919	-0.21097	0.0125075	-0.430255	0.0113671	0.128308	0.0578879	non-dropout
CD300A	6	0	0.568959	7.46251e-08	0.779432	0.000158857	0.417196	0.21987	-2.68268	2.85746e-37	non-dropout
SCAMP4	2	0	0.18788	0.0472762	-0.0950967	0.39689	-0.187233	0.41815	-0.332908	0.000764489	non-dropout
MGAT4A	3	0	-0.401582	0.00092039	-0.439157	8.89561e-06	0.156369	0.494254	0.0670978	0.655975	non-dropout
CASC4	5	0	0.165102	0.0366815	-0.0208797	0.877758	0.123576	0.609175	-0.0963507	0.273586	non-dropout
C12orf57	6	0	-0.326364	0.000116098	-0.217802	0.0664595	-0.707347	0.000367012	0.482456	1.55673e-06	non-dropout
GLCCI1	7	0	0.358825	0.00803623	1.3163	3.53491e-37	0.791996	0.000595126	0.199105	0.304479	non-dropout
TMEM106A	1	0	0.265742	0.000575564	0.0431798	0.728312	0.587597	0.0010424	0.856884	4.50382e-17	non-dropout
STK38	7	0	0.375194	5.30809e-11	0.650135	3.31741e-15	0.369831	0.0437401	-0.580409	2.06981e-16	non-dropout
CBX3	2	0	-0.341194	2.39271e-08	-0.045813	0.650227	-0.199331	0.264375	-0.237503	0.000128814	non-dropout
GABARAP	5	0	0.293678	0.000375904	0.00300372	0.982268	-0.35017	0.0759935	-0.481962	5.01506e-07	non-dropout
MGLL	2	0	1.31771	0.000603219	NA	NA	3.15114	2.17936e-06	NA	NA	non-dropout
HELQ	4	0	-0.160503	0.0371916	-0.0140635	0.893806	0.0231725	0.925367	0.432019	2.85441e-09	non-dropout
CYP2U1	1	0	-0.220313	0.040344	0.164732	0.172517	0.0693719	0.777723	1.36422	2.73716e-51	non-dropout
SLC2A13	1	0	-0.239947	0.0439115	-0.0996791	0.523954	0.48384	0.0371497	0.720315	2.82667e-14	non-dropout
LACTB	2	0	0.412176	0.0250144	0.348958	0.121954	0.349457	0.313385	2.03932	1.6373e-52	non-dropout
EFHC1	1	0	0.353517	0.00231983	-0.0211068	0.911541	0.330991	0.211901	-0.814044	3.33536e-06	non-dropout
NLRP3	10	0	-0.272021	0.0014438	-0.222278	0.0139799	-0.210557	0.255025	-0.605804	4.95999e-23	non-dropout
MIR155HG	6	0	-0.247303	0.0389387	-0.457299	1.15839e-05	-0.0891546	0.717678	0.0831139	0.283413	NA
ERMAP	3	0	0.627285	1.09064e-08	0.249128	0.0704929	0.399917	0.089327	0.09377	0.589617	non-dropout
BTBD9	5	0	0.165011	0.0410272	0.631986	1.50311e-13	-0.117623	0.597855	0.0691955	0.462593	non-dropout
MBD6	11	0	0.21682	0.0194286	0.193092	0.0235964	0.116724	0.591075	-0.421282	1.01415e-06	non-dropout
GPRIN1	3	0	0.520444	1.20036e-12	-0.0651905	0.544435	-0.429227	0.0132798	-0.81106	6.85885e-22	non-dropout
SLC25A25	4	0	-0.198866	0.0232844	0.285299	0.00398462	-0.456781	0.00703181	1.0442	2.79373e-50	non-dropout
STK11IP	4	0	0.356078	3.29516e-05	0.186276	0.128554	-0.0632811	0.794299	-0.562508	1.35179e-09	non-dropout
TUBGCP5	2	0	0.229924	0.000660176	-0.399023	1.42032e-07	0.118392	0.540056	0.324816	1.43186e-06	non-dropout
FMNL2	9	0	-1.05366	8.27376e-71	-0.372441	5.42023e-08	-0.524769	0.000490381	0.112484	0.0745209	non-dropout
OSBPL9	6	0	0.159775	0.0301177	0.0539874	0.627967	0.198704	0.324509	-0.12626	0.10324	non-dropout
FBXO32	10	0	0.93864	2.68535e-12	0.233632	0.0623628	0.324445	0.245402	-2.03899	2.02711e-22	non-dropout
ZNF618	2	0	-0.167565	0.0140536	0.0553525	0.590144	0.175224	0.344322	0.17569	0.0137215	non-dropout
MB21D1	1	0	-0.747057	1.70915e-27	-0.360702	1.18888e-05	-0.757198	1.54454e-07	-0.23109	0.000288982	non-dropout
SLC26A9	1	0	1.63534	1.7553e-31	-1.0703	1.04008e-08	1.30003	1.26453e-05	-5.05875	6.25638e-21	non-dropout
NT5C3B	1	0	-0.323909	0.0284199	-0.00795768	0.971629	-0.174087	0.564193	0.307311	0.072521	non-dropout
KCTD12	2	0	-0.577747	1.56172e-18	-0.540396	2.8775e-09	-0.09657	0.665859	0.886524	4.71047e-52	non-dropout
DDIT4L	5	0	-0.955	0.000411923	0.0725511	0.871649	2.54156	2.13632e-07	0.765316	0.031183	non-dropout
SLC25A26	1	0	0.309515	0.000249669	-0.0506241	0.750019	0.0953705	0.700882	-0.406016	9.3302e-05	non-dropout
CIRBP	7	0	-0.198678	0.00199068	0.0498091	0.612127	-0.437652	0.0140634	1.11105	7.47245e-79	non-dropout
UHRF2	8	0	0.14132	0.0191762	-0.219115	0.00148369	0.291531	0.0691384	-0.0447652	0.478874	non-dropout
ZNF689	4	0	-0.253754	8.1816e-05	-0.136394	0.302131	-0.401013	0.0363386	-1.18818	8.52602e-63	non-dropout
DIS3L	1	0	-0.573374	2.85528e-14	0.0150622	0.904798	-0.0773734	0.736302	-0.224002	0.003714	non-dropout
IQCD	1	0	0.651238	0.00928936	NA	NA	2.0227	0.000100246	NA	NA	non-dropout
ZNF653	4	0	0.26421	0.040763	0.100626	0.559651	-0.423365	0.0835987	-0.0551463	0.736838	non-dropout
ZNF526	6	0	-0.293262	1.02956e-05	-0.0594834	0.594338	-0.409568	0.0231466	0.531826	1.74144e-11	non-dropout
ABHD15	3	0	-0.940378	8.62385e-36	-0.0294457	0.832649	0.174374	0.372923	0.794491	1.03114e-22	non-dropout
CKS1B	6	0	-0.384724	0.000269864	-0.314937	0.00985259	-0.183373	0.419497	0.747271	1.11959e-11	NA
CKS2	2	0	-0.295284	4.37562e-05	-0.0751799	0.463844	-0.480885	0.00605967	0.737334	1.60939e-30	non-dropout
FAM129A	4	0	-1.27184	6.14622e-15	0.46083	0.0254829	2.72981	4.2445e-23	0.315704	0.113841	non-dropout
MED12L	1	0	-0.680811	4.91942e-39	-0.349183	2.12406e-08	-1.20343	1.08609e-18	0.201074	0.000481234	non-dropout
ARAP2	6	0	-0.767355	2.03332e-23	-0.188567	0.0106088	-0.0827517	0.705697	-0.339119	4.1412e-08	non-dropout
ARAP1	1	0	0.215082	0.00451737	0.53298	9.9031e-10	0.0672335	0.771789	-0.58478	9.1405e-11	non-dropout
AGAP1	7	0	-0.322905	6.21596e-05	0.396944	3.78699e-05	-0.062131	0.798955	0.368977	5.61059e-05	non-dropout
SSX2IP	3	0	0.473332	3.58955e-09	0.277137	0.00253768	0.528013	0.00517941	-0.229276	0.0246238	non-dropout
FTSJ3	3	0	-0.162802	0.0222841	0.124149	0.187497	-0.409822	0.0166274	0.363555	8.38347e-07	non-leukemia-specific dropout
TAGAP	8	0	-0.41484	1.71964e-06	-0.981094	4.4561e-26	0.429096	0.0342242	0.19332	0.0326735	non-dropout
AP1S1	7	0	0.296102	0.0239741	0.0283998	0.929389	-0.226251	0.448826	-1.13141	4.37576e-08	non-dropout
CLCN4	2	0	-0.418498	8.9995e-06	1.41995	4.84652e-35	1.36871	3.11698e-14	-0.48121	0.00177489	non-dropout
CLCN5	1	0	0.293885	0.00091752	-0.136908	0.311154	0.602414	0.000958314	0.0531422	0.639598	non-dropout
ANTXR2	3	0	-0.215447	0.00684896	-0.315886	0.00521853	0.174993	0.482862	-0.0978478	0.438612	non-dropout
ZNF511	1	0	-0.196637	0.0289503	-0.169389	0.147535	-0.654185	0.000644968	0.0909502	0.306001	non-dropout
CHCHD1	3	0	-0.410814	0.00356055	-0.00738837	0.964669	-0.529162	0.0150215	-0.172587	0.220664	non-dropout
CFAP70	2	0	1.26081	1.21725e-15	0.893306	1.27696e-07	0.618667	0.0389514	0.536386	0.0203089	NA
CLCN6	8	0	0.211201	0.00223239	0.18885	0.0122497	0.205753	0.265236	0.0376299	0.637383	non-dropout
CLCN7	3	0	0.482229	3.33571e-07	0.469427	5.79736e-07	-0.00537523	0.986291	0.0861834	0.485804	non-dropout
PDZD8	6	0	-0.186059	0.0100973	-0.104769	0.213867	-0.107275	0.583663	0.398802	1.64266e-08	non-dropout
ADD2	4	0	0.338141	4.87561e-08	0.355949	2.45783e-06	0.133823	0.472979	-0.37483	3.71507e-08	non-dropout
CLK1	2	0	-0.197247	0.000794791	0.00616669	0.950552	0.0440437	0.839755	0.490708	2.25706e-19	non-dropout
ADD3	5	0	0.29976	1.38316e-05	0.242928	0.00341433	0.280523	0.185145	0.512507	1.32026e-10	non-dropout
TPP1	7	0	0.208456	0.037654	0.232009	0.0129649	0.180076	0.415786	-0.315957	0.00236203	non-dropout
CLN3	2	0	0.526652	1.36484e-06	0.221028	0.0927993	0.0121722	0.970575	-1.20506	1.17014e-14	non-dropout
CYP2R1	1	0	-0.410896	1.3537e-07	-0.900558	4.55898e-15	0.630005	0.002232	-0.121051	0.233072	non-dropout
ARL14EP	1	0	0.318163	1.47484e-05	-0.0464179	0.650642	0.296467	0.102137	0.124275	0.0820727	non-dropout
LRRK2	1	0	0.167486	0.0393241	0.188409	0.107366	0.7907	1.36228e-05	-0.266014	0.0168111	non-dropout
ZNF641	6	0	0.258798	0.000409036	-0.0671404	0.510745	0.249362	0.190921	-0.134859	0.0614358	non-dropout
TPH2	1	0	-2.68169	3.94353e-35	0.258255	0.0217306	-1.95594	2.43816e-08	-1.82614	1.69542e-37	non-dropout
CLTC	8	0	0.225849	2.98255e-05	0.653479	1.17846e-33	0.0749425	0.69567	-0.223556	0.000147934	non-leukemia-specific dropout
IKBIP	2	0	-0.364139	2.06758e-05	-0.175222	0.128292	-0.0204783	0.945719	-0.153681	0.0779774	non-dropout
HIST4H4	4	0	-0.453427	1.93513e-07	0.0147835	0.945261	-0.535079	0.0424114	0.994945	2.69539e-22	non-dropout
BTBD11	1	0	0.874453	1.07495e-27	0.376287	0.000104781	0.694154	0.00046607	0.353123	0.00743427	non-dropout
ALKBH2	1	0	-0.271876	0.00727791	0.155203	0.358693	-0.0748678	0.794158	-0.663589	6.01907e-05	non-dropout
SLAIN1	9	0	-0.826678	8.15939e-23	0.487163	2.53622e-09	-1.03977	6.14279e-12	0.0983773	0.30544	non-dropout
PLD4	1	0	0.76319	4.73445e-09	0.304211	0.204668	1.48162	9.86258e-09	-1.02545	1.06708e-05	non-dropout
LRR1	1	0	-0.381244	3.33538e-07	-0.276748	0.000260782	-0.194512	0.325441	0.192857	0.00276351	non-leukemia-specific dropout
JDP2	1	0	-0.813744	2.39158e-25	-1.04276	5.00421e-09	1.12958	2.50979e-07	0.320621	0.0671256	non-dropout
PLIN2	2	0	0.266449	0.00145843	-0.258044	0.00227308	-0.615363	0.000117605	0.223965	0.000370479	non-dropout
CCR1	6	0	-0.467607	0.000130901	-2.67	2.80848e-36	-0.36491	0.189031	-3.75225	3.03725e-143	non-dropout
SLC25A29	2	0	0.524592	1.45868e-13	0.101032	0.299195	-0.125096	0.556748	0.214853	0.00976624	non-dropout
SENP8	1	0	0.420283	0.0285863	0.0649679	0.877313	0.440316	0.288555	0.406811	0.227941	non-dropout
TARSL2	2	0	0.514783	1.80611e-14	0.571503	6.55321e-12	0.171762	0.418539	1.21611	2.36136e-61	non-dropout
NIPA1	1	0	-0.260251	0.000162342	0.0512477	0.54671	-0.149413	0.470866	-0.468596	5.563e-08	non-dropout
SPATA2L	2	0	0.39444	0.00231983	0.233512	0.0632038	-0.208081	0.459568	0.195136	0.0582922	non-dropout
UBALD1	5	0	0.288266	0.000671684	0.152162	0.223855	-0.116237	0.66651	0.00563868	0.961667	non-dropout
ZNF720	1	0	0.282826	0.0241464	0.157502	0.316946	0.27809	0.318595	0.90335	4.99732e-14	non-dropout
METTL23	5	0	-0.16336	0.040763	0.131067	0.16033	-0.379907	0.0529292	-0.190257	0.0307691	non-dropout
MSI2	2	0	0.413434	1.54123e-10	0.416643	5.07144e-07	0.390306	0.028753	0.0806459	0.306781	non-dropout
CANT1	1	0	-0.148358	0.0478065	-0.00497889	0.970774	-0.40766	0.0319919	0.101846	0.285257	non-dropout
USP43	1	0	-0.204453	0.0365461	0.284256	0.00228975	-0.232791	0.248413	-1.15814	2.26098e-21	non-dropout
HEXIM2	1	0	-0.397817	0.00148612	-0.133623	0.388233	-0.439211	0.0957111	-1.7618	2.86435e-13	non-dropout
ANKRD13B	2	0	0.377046	0.00149921	-0.0268692	0.91571	-0.325005	0.149255	-0.44611	0.00179604	non-dropout
SLC43A2	4	0	0.649981	2.15649e-14	0.38394	6.47039e-07	0.793885	5.89941e-08	-1.64871	1.59744e-85	non-dropout
WDR81	9	0	0.226282	0.00166603	0.00826021	0.953402	-0.402415	0.0267504	-1.28324	1.10174e-58	non-dropout
RN7SK	2	0	-0.273043	3.45071e-06	-0.0380682	0.764898	-0.14761	0.701012	-0.0628676	0.381164	NA
INO80C	2	0	-0.266766	0.00477029	-0.592382	8.72782e-09	-0.132722	0.573802	-0.260352	0.015126	non-dropout
TTC39C	6	0	0.170163	0.00937589	-0.219521	0.0312878	0.484337	0.00256195	-0.604401	1.10676e-22	non-dropout
ZNF816	1	0	-0.216164	0.00205651	-0.127027	0.166325	-0.255987	0.163629	0.347468	1.58659e-06	non-dropout
ZNF543	3	0	-0.213652	0.00912747	0.346475	0.00015529	0.185432	0.385508	0.0240612	0.823406	non-dropout
C19orf70	3	0	-0.452165	0.000935549	0.0160734	0.95103	-0.689021	0.0105386	-0.601286	0.00653743	non-dropout
ZNF813	1	0	-0.163819	0.0474657	-0.0627144	0.526503	0.0721794	0.739614	-0.16673	0.0136956	non-dropout
ZNF441	1	0	-0.268701	0.00168008	0.0189711	0.875489	0.0607804	0.8154	0.179281	0.00370308	non-dropout
ALDH16A1	2	0	0.501054	7.77104e-06	0.159951	0.139253	0.141909	0.526877	0.163169	0.174058	non-dropout
IRGQ	5	0	0.259972	0.00860996	-0.229751	0.0164542	-0.407683	0.00792641	-0.5945	8.39019e-26	non-dropout
PLK3	4	0	-0.298976	0.00341838	0.0634649	0.61797	-0.65032	0.000323639	0.595729	2.75794e-16	non-dropout
MOB3A	3	0	-0.265741	0.00171565	-0.364622	8.58632e-05	0.113067	0.550011	-2.34305	0	non-dropout
ZNF792	1	0	-0.486513	1.02254e-11	0.854098	3.31348e-28	-0.403298	0.032949	-0.975517	5.19747e-25	non-dropout
NR2C2AP	1	0	-0.218175	0.0320702	-0.345305	0.00181338	-0.651606	0.00178458	-0.119434	0.316433	non-dropout
ANKLE1	2	0	-0.43377	2.89108e-10	-0.0216278	0.859026	-0.553815	0.000363097	-0.329086	2.83102e-06	non-dropout
B3GALT6	2	0	-0.229332	0.00200489	-0.173904	0.134351	-0.475913	0.0137406	-0.724888	9.7351e-15	non-dropout
LYPLAL1	3	0	0.270767	0.0144616	-0.138624	0.313072	0.564652	0.00974368	-0.0189275	0.905813	non-dropout
ZNF684	2	0	-0.36066	0.00328907	-0.615248	9.78337e-06	0.175531	0.545383	0.737748	2.5589e-17	non-dropout
COL1A1	1	0	0.736905	0.00132515	-1.33717	0.00115653	1.19386	0.0201188	NA	NA	non-dropout
C1orf216	4	0	0.356082	0.000835993	0.0378572	0.831387	-0.124102	0.622888	-0.137888	0.270664	non-dropout
UBXN10	1	0	0.258446	0.040344	0.124781	0.437386	0.369832	0.158309	-3.45855	4.08916e-78	non-dropout
FCRLB	3	0	1.82385	2.83651e-24	0.784409	0.000456011	1.28729	0.000141583	-1.46882	4.60775e-05	non-dropout
LIX1L	8	0	0.332193	0.000110658	0.197434	0.156447	0.109529	0.671353	0.123047	0.103923	non-dropout
IQGAP3	3	0	-0.287166	0.000512341	-0.607894	1.97889e-18	0.225378	0.244207	-0.804403	6.69882e-26	non-dropout
C1orf162	1	0	0.708503	0.0289383	0.279443	0.572682	NA	NA	NA	NA	non-dropout
TBC1D20	4	0	-0.147699	0.0250121	0.00648703	0.952018	-0.223293	0.213864	0.873305	1.70146e-40	non-dropout
SLX4IP	2	0	0.309212	0.00981129	0.0758117	0.644964	0.194314	0.407635	0.00962318	0.947498	non-dropout
TANGO2	2	0	0.188211	0.0269964	0.206406	0.0453238	-0.213313	0.279299	-0.235547	0.00725609	non-dropout
COL5A2	1	0	0.663328	0.000841402	0.25079	0.348717	0.46056	0.246404	0.394383	0.25898	non-dropout
EMID1	3	0	1.43187	4.25192e-10	-0.813589	0.0949067	2.76833	1.17295e-08	-1.88778	4.15957e-07	non-dropout
PPP1R21	5	0	0.191048	0.0389904	0.0525883	0.668454	-0.0182557	0.950582	-0.227098	0.015074	non-dropout
NUP35	3	0	-0.247348	0.00202844	-0.430446	2.92559e-06	-0.14009	0.495697	-0.446154	2.14009e-09	non-dropout
CMPK2	1	0	-0.540752	7.95104e-07	0.671624	2.9954e-11	0.119511	0.646342	-1.15277	3.24184e-19	non-dropout
TMEM18	2	0	-0.168333	0.0445487	0.0263798	0.797404	-0.0850044	0.697268	0.186226	0.0106617	non-dropout
LINC01006	1	0	0.894064	0.00739631	0.720407	0.130111	0.823786	0.162558	NA	NA	NA
FBLN7	1	0	0.867007	1.96098e-05	-0.0593259	0.906025	2.59828	1.54487e-08	-2.76207	8.09515e-08	non-dropout
CLHC1	7	0	0.251057	0.0371056	0.136687	0.258074	0.279132	0.241848	-0.0583253	0.636944	non-dropout
AP1S3	4	0	0.673331	3.34771e-08	0.0318767	0.881252	0.23358	0.417262	-0.0341621	0.817326	non-dropout
UBR3	1	0	0.441331	1.54422e-14	0.108218	0.182517	0.190096	0.293515	0.689526	1.10007e-30	non-dropout
GALM	6	0	-0.456035	0.0360559	0.295935	0.236234	-0.234125	0.557603	-0.414744	0.0139862	non-dropout
ZFAND2B	3	0	-0.222964	0.0306836	-0.0561528	0.695946	-0.630541	0.00204806	0.194887	0.0844191	non-dropout
CRYBG3	1	0	-0.179942	0.00588427	0.0534492	0.632936	0.123735	0.528573	0.746917	6.15887e-30	NA
LRRC15	1	0	-1.14151	0.000145591	1.90401	6.44706e-34	-0.550484	0.165184	-3.61327	4.21055e-25	non-dropout
FAM43A	6	0	-0.394112	7.37486e-07	0.102466	0.408095	-0.317157	0.0984307	0.473451	2.25441e-13	non-dropout
KLF6	15	0	-0.366294	5.61148e-08	-0.239187	0.0314861	-0.225382	0.262226	0.24928	0.00531761	non-dropout
SLC31A2	8	0	0.520827	0.0426792	0.124003	0.755126	0.330787	0.594383	0.312603	0.308052	non-dropout
NUDT16	1	0	0.307568	0.000100819	0.3108	0.000726942	0.275089	0.16386	-0.0372724	0.735242	non-dropout
PPM1M	5	0	-0.396402	0.0057969	0.0830809	0.628824	0.26742	0.290293	-1.90742	4.15652e-29	non-dropout
OCIAD2	1	0	0.471741	0.0238645	0.304165	0.414629	-0.0536115	0.914062	-1.02499	0.00160594	non-dropout
MAP3K8	6	0	0.328933	2.59417e-05	0.196875	0.0541948	0.470409	0.0133083	1.11499	1.60098e-26	non-dropout
CPEB2	13	0	-1.95802	1.67768e-151	-0.163017	0.0589154	-1.56571	2.18832e-26	0.466153	1.00171e-18	non-dropout
EMB	2	0	-0.243284	0.0105999	-0.328793	0.00129393	0.31976	0.113338	-1.08854	2.39534e-53	non-dropout
FAM173B	1	0	0.23605	0.0319595	-0.11161	0.519834	0.527867	0.0158694	0.0960652	0.465733	non-dropout
GRPEL2	2	0	-0.444471	3.81065e-14	-0.437802	9.02358e-10	-0.236618	0.171818	-0.715774	3.03357e-39	non-dropout
NUDCD2	3	0	-0.45066	0.00403439	-0.390727	0.000701884	-0.237028	0.335748	-0.276664	0.0333689	non-dropout
ADAT2	1	0	0.372957	8.35011e-07	-9.70727e-05	0.999377	-0.00343545	0.989772	-0.919591	1.77381e-30	non-leukemia-specific dropout
STXBP5	3	0	-0.451769	1.03221e-07	0.218578	0.0273072	0.30277	0.125261	0.240022	0.00645743	non-dropout
NCOA7	14	0	-0.248973	0.000154779	-0.262465	0.00388766	0.233269	0.199938	-0.650262	3.02714e-26	non-dropout
HINT3	2	0	0.204982	0.0441687	-0.159896	0.188098	0.0860343	0.743944	-0.274427	0.00668808	non-dropout
CD109	4	0	-0.260102	0.000808668	1.22253	1.05752e-69	-0.756839	4.00339e-06	-0.529393	8.91783e-13	non-dropout
PM20D2	5	0	-0.396943	1.11626e-07	-0.390083	5.63126e-08	0.0211902	0.936078	-0.298075	1.60073e-05	non-dropout
LRGUK	1	0	1.07157	3.04695e-05	0.859925	0.000261039	0.518615	0.224738	0.681905	0.0139762	non-dropout
CLDN7	1	0	-1.277	1.43108e-05	NA	NA	NA	NA	NA	NA	non-dropout
CCDC26	1	0	0.211127	0.00856717	0.124277	0.382103	0.235685	0.261703	-0.0142593	0.897838	NA
CPT1A	4	0	0.760532	4.21461e-08	1.79499	5.79948e-38	0.808372	0.0116582	-0.217209	0.415237	non-dropout
TMEM68	1	0	-0.275805	0.00184351	-0.474074	1.06128e-05	0.146737	0.527063	0.108055	0.223412	non-dropout
HGSNAT	3	0	0.422346	6.7291e-07	0.532332	1.78668e-05	0.854864	1.02469e-05	0.0651637	0.614563	non-dropout
FAM69B	1	0	-0.733255	5.18337e-08	0.671772	5.29843e-11	-0.376124	0.224373	-1.48324	8.77214e-15	non-dropout
SLITRK4	1	0	-0.602423	3.82016e-15	0.267173	0.0013832	0.533071	0.00456377	-1.90883	3.16583e-75	non-dropout
APOOL	3	0	0.240853	0.00271195	-0.261143	0.0288593	0.361784	0.11006	-0.372117	2.98132e-06	non-dropout
CRIP1	2	0	0.299834	0.020893	0.515753	0.00386674	0.566906	0.0741361	0.948995	2.03119e-06	non-dropout
CRK	4	0	-0.152671	0.0212551	-0.172791	0.0296057	0.0848324	0.694222	0.61842	1.04605e-15	non-dropout
DOCK11	6	0	-0.25372	4.80643e-05	0.631671	2.26047e-17	-0.0513839	0.805724	0.0472307	0.475141	non-dropout
SPIN4	4	0	-0.327739	0.011954	-0.159321	0.156447	0.257358	0.25211	0.35425	1.63719e-05	non-dropout
CRKL	11	0	-0.211339	0.000147688	-0.135389	0.145361	-0.376295	0.016516	0.220045	0.000268477	non-dropout
CRMP1	1	0	-0.373087	1.11984e-08	1.21043	3.04585e-47	0.327172	0.0889825	-1.79592	9.54025e-64	non-dropout
C20orf96	3	0	0.256513	0.0393581	-0.111659	0.565599	0.0987194	0.749542	0.124254	0.410724	non-dropout
NOL4L	1	0	0.368087	2.85216e-10	0.814441	2.10637e-29	0.378346	0.0231471	-0.840972	5.95232e-38	NA
SAMD10	4	0	0.912518	0.00591122	NA	NA	NA	NA	NA	NA	non-dropout
SOGA1	1	0	-0.23719	0.000287118	0.333362	1.65538e-05	-0.146818	0.437285	-0.10084	0.259719	non-dropout
UBE2F	8	0	0.393034	5.4604e-06	0.303265	0.0286033	0.324038	0.174304	-0.0272132	0.8583	non-dropout
NEURL2	4	0	0.331489	0.00641808	0.0228425	0.90562	-0.211622	0.4947	-0.884831	9.79426e-06	non-dropout
ZSWIM3	1	0	-0.319452	0.00130202	0.134991	0.35957	-0.49006	0.0239808	0.25037	0.157393	non-dropout
NANP	4	0	-0.383398	2.24708e-07	-0.756621	1.69785e-21	-0.241981	0.205358	0.135914	0.0469455	non-dropout
ISM1	1	0	-0.911882	2.70944e-05	0.306043	0.0796117	0.543085	0.05004	-1.29183	1.92642e-07	non-dropout
SIRPA	5	0	-0.448636	4.69989e-09	-1.17084	1.65307e-16	0.468234	0.047023	-1.68093	4.3524e-38	non-dropout
STK35	1	0	-0.130544	0.0328887	-0.140218	0.106092	-0.157061	0.374787	0.753266	3.49018e-40	non-dropout
PARP4	3	0	0.240829	9.58493e-05	0.0436839	0.65915	0.418853	0.0113671	0.0859875	0.218312	non-dropout
VTI1A	1	0	0.344365	1.75995e-06	0.149357	0.0859509	0.0630151	0.781776	0.235827	0.00660263	non-dropout
MAPK14	8	0	-0.365481	4.71218e-09	0.143984	0.0419965	0.0118899	0.960741	0.46745	6.97679e-13	non-dropout
CSF1	17	0	-0.98496	7.58658e-10	-0.828247	0.0010882	-0.0573175	0.901955	-3.89021	4.77616e-26	non-dropout
XRRA1	5	0	0.31613	0.0108973	0.136999	0.388754	0.450727	0.0611297	0.436419	0.0012207	non-dropout
CSF1R	9	0	-0.29734	0.000111637	-0.91921	1.24925e-16	0.181811	0.42889	-3.56725	9.35975e-164	non-dropout
SESN3	5	0	0.666654	9.49176e-22	1.15422	1.48068e-34	1.12925	4.58542e-09	2.60466	1.96575e-110	non-dropout
TMEM86A	3	0	0.65743	1.23922e-06	0.290073	0.0689601	-0.0267135	0.950556	0.91407	7.94463e-07	non-dropout
PRICKLE1	6	0	0.617162	3.82164e-12	1.13599	1.35572e-34	0.797666	1.50846e-05	-1.48063	5.57837e-27	non-dropout
SLC2A14	2	0	-1.29882	4.41572e-15	-1.2625	0.000280174	-0.0236035	0.976855	0.412384	0.234667	non-dropout
CPNE8	2	0	-0.565198	2.05718e-12	-0.454353	1.62509e-07	-0.425745	0.0137424	-0.00814513	0.925225	non-dropout
MIPOL1	1	0	0.298134	0.00690449	-0.153483	0.301741	0.244711	0.298301	0.113616	0.279131	non-dropout
CSNK1D	7	0	0.19262	0.0114795	0.0674272	0.456487	-0.105574	0.589785	-0.269038	2.91605e-05	non-dropout
SLC38A6	2	0	0.396115	0.00599557	0.280111	0.131914	0.135599	0.692163	-0.57578	0.00147196	non-dropout
CSNK1E	2	0	-0.429866	0.0155724	-0.338958	0.115228	-0.333331	0.351335	-0.47062	0.0712434	non-dropout
C14orf37	2	0	0.951772	1.09652e-17	-0.0474067	0.859286	0.713798	0.00576506	1.89116	4.72204e-34	non-dropout
CSNK1G3	8	0	-0.148242	0.0484222	-0.00336574	0.976545	-0.0496171	0.825102	-0.0134759	0.869667	non-dropout
FAM81A	3	0	-0.547445	0.00116104	-0.454801	0.00975775	0.0386217	0.908	0.495696	0.00324001	non-dropout
C15orf61	5	0	-0.302901	0.0192389	-0.168581	0.299097	-0.498807	0.0434074	-0.402698	0.00852565	non-dropout
VCAN	3	0	-0.945785	7.72308e-33	-1.88329	1.74757e-83	1.23308	2.34182e-13	-0.69348	7.94677e-20	non-dropout
CSPG4	3	0	-0.730772	2.09844e-44	-0.619354	4.98227e-13	-0.785672	2.65407e-06	-2.14584	5.11094e-270	non-dropout
ZNF785	2	0	-0.31673	5.98562e-06	-0.200494	0.032493	-0.131488	0.529766	-0.899452	3.91625e-18	non-dropout
B3GNTL1	3	0	0.246424	0.0241851	0.0447493	0.800692	0.11467	0.670189	-0.731941	8.14637e-06	non-dropout
CD300LF	1	0	-0.571175	0.00151292	-0.964633	0.0293248	0.373974	0.391877	-2.10116	1.8646e-11	non-dropout
KIF18B	8	0	-0.383587	1.49344e-10	-0.259621	0.00361878	-0.0319861	0.893139	-0.249064	0.000184078	non-dropout
TMC8	3	0	-0.230532	0.00451147	0.425063	1.17178e-06	-0.621599	0.000140828	-1.46809	1.20323e-65	non-dropout
VSIG10L	1	0	0.636978	0.0179305	0.520377	0.133375	0.351616	0.496738	-0.467981	0.225064	non-dropout
CSTF1	8	0	-0.207381	0.00216728	-0.129161	0.0900228	-0.223871	0.198306	-0.53055	4.23189e-15	non-leukemia-specific dropout
ILF3-AS1	5	0	-0.330311	0.000286176	-0.06988	0.613152	-0.390429	0.0623762	-0.360678	0.000667978	NA
SPC24	2	0	-0.392994	0.000924708	-0.181955	0.0838049	0.0111075	0.974334	0.0674843	0.546351	non-leukemia-specific dropout
DACT3	1	0	0.614426	0.0167849	0.820791	0.00119858	-0.0155276	0.984998	1.45682	2.4119e-10	non-dropout
TICAM1	1	0	0.317351	0.00401309	0.333282	0.0288628	-0.726364	0.00105949	-0.423868	0.0133168	non-dropout
SAMD11	3	0	-0.244049	0.00836283	0.72085	0.000655424	0.35141	0.267284	-1.4728	1.98226e-21	non-dropout
CTBS	2	0	0.322081	0.00417161	0.198663	0.129407	0.614616	0.0124935	0.806967	4.77625e-16	non-dropout
CTBP1	7	0	-0.194077	0.00286839	0.0663553	0.511966	-0.560578	0.000820388	-0.414899	3.65211e-07	non-dropout
B3GALNT2	5	0	0.186078	0.00522094	-0.360014	1.15809e-06	0.327031	0.090117	0.324887	1.74115e-07	non-dropout
CTGF	2	0	-0.47931	2.30777e-05	1.14792	3.62101e-20	0.240744	0.301549	-0.222469	0.0847406	non-dropout
CTH	1	0	-0.402012	0.00241962	-0.815803	1.59409e-08	0.325731	0.225844	1.2551	6.10478e-23	non-dropout
BTBD19	1	0	-0.564767	0.00438343	0.399472	0.161961	-0.340228	0.364982	0.747956	3.95804e-05	NA
CTNS	1	0	0.213392	0.0483835	0.25848	0.11382	-0.271454	0.335748	1.04688	3.09962e-11	non-dropout
SIK1	4	0	1.06927	3.83259e-08	-0.121923	0.559621	-0.127192	0.710522	0.427853	5.44577e-06	non-dropout
YDJC	6	0	-0.258063	0.000638132	0.0921467	0.37353	-0.631042	0.000763857	-0.970909	2.50742e-26	non-dropout
CCDC117	3	0	-0.330482	3.17543e-06	-0.113685	0.270692	-0.124641	0.513646	0.530005	4.99171e-14	non-dropout
ITPRIPL1	1	0	-0.589621	7.68066e-20	-0.482358	7.57755e-06	-0.804303	4.39378e-07	-0.843174	2.05458e-25	non-dropout
CTSB	4	0	0.245245	0.001903	-0.0814329	0.505095	0.480471	0.0139818	0.549619	1.77995e-12	non-dropout
CTSD	3	0	0.715044	2.24257e-19	0.320135	0.0128294	-0.312971	0.175063	-0.662058	1.6167e-06	non-dropout
KANSL1L	7	0	0.280208	0.00544754	0.171893	0.0905233	0.282482	0.175995	0.277744	0.00384041	non-dropout
ARL6IP6	5	0	-0.211759	0.0431541	-0.32902	0.00036047	0.189189	0.407861	0.861122	1.17491e-28	non-dropout
RMDN2	1	0	0.397207	0.0458163	0.547976	0.00853087	0.557067	0.0763837	-0.752408	0.000525903	non-dropout
PPM1L	3	0	-0.44894	7.84586e-08	0.0714361	0.557778	0.0717912	0.766804	0.268866	0.00560724	non-dropout
CTSO	2	0	0.563867	2.82281e-07	0.0869006	0.456487	0.402651	0.0504195	-0.380103	0.000222015	non-dropout
RNF38	2	0	-0.152053	0.0153898	-0.055871	0.468055	-0.00707113	0.976855	0.130015	0.0502132	non-dropout
CCDC50	9	0	0.257978	0.00011487	-0.156437	0.0817285	0.418542	0.025995	-1.09929	2.47051e-76	non-dropout
SPICE1	2	0	0.179533	0.0257401	0.0316787	0.80723	0.155069	0.452764	0.35143	5.22179e-05	non-dropout
CTSZ	3	0	-0.20326	0.0132684	-0.209298	0.123611	0.577208	0.00185638	-0.929006	1.35169e-15	non-dropout
ZNF827	1	0	0.611716	4.72656e-11	0.419713	0.00843811	1.2755	3.03779e-11	0.0189406	0.84608	non-dropout
RASGEF1B	1	0	0.896533	2.09844e-44	-0.159857	0.077645	1.67188	3.41289e-26	0.687524	1.11052e-18	non-dropout
DAB2IP	2	0	-0.291651	0.00022033	0.554201	3.67936e-14	-0.306384	0.0817221	-1.74701	3.62861e-78	non-dropout
CREBRF	15	0	0.289631	0.00192617	0.265709	0.000971228	0.61289	0.000983402	-0.513513	1.13591e-08	non-dropout
CEP120	8	0	-0.202604	0.00750559	-0.487721	3.4353e-10	0.136866	0.493921	-0.513865	7.95359e-12	non-dropout
MBLAC2	1	0	-0.232725	0.0119543	0.104259	0.360483	-0.223942	0.288685	0.554901	1.2685e-12	non-dropout
BTNL9	2	0	0.527332	2.44073e-08	0.505356	3.75547e-08	0.405269	0.0385088	-1.22027	3.40679e-38	non-dropout
ADRB2	2	0	-0.30548	0.00371471	-0.579341	0.000101197	1.36718	4.82878e-09	2.01192	7.16738e-48	non-dropout
CYLD	10	0	0.306475	5.75014e-06	0.165364	0.0491776	0.321461	0.0817221	-0.69663	1.82297e-19	non-dropout
CNKSR3	7	0	-0.821614	1.6884e-13	0.729219	2.91077e-06	1.07839	4.83495e-06	-0.334382	0.0956194	non-dropout
MBOAT1	2	0	-0.630857	5.05439e-19	0.283157	0.008932	-0.0572882	0.818468	-0.383948	1.88159e-05	non-dropout
RNF217	1	0	-0.585047	1.84925e-09	0.917703	6.95304e-21	0.645398	0.00211795	0.0043536	0.974771	non-dropout
AMOT	2	0	-0.347897	2.75185e-07	0.325138	0.000306954	-0.295094	0.130104	-0.269399	0.0109173	non-dropout
VKORC1L1	7	0	-0.343662	0.000137584	-0.102368	0.353616	0.272999	0.231171	-0.0344172	0.695113	non-dropout
LINC00689	1	0	0.833343	6.25621e-06	0.358918	0.122413	1.10779	0.00025085	-4.55016	1.03256e-29	NA
KCTD7	1	0	0.294391	0.00346932	0.0518088	0.649985	0.37964	0.0878737	0.498157	2.82094e-08	non-dropout
GIMAP8	2	0	-0.84623	1.93966e-09	-0.263732	0.289732	-0.0312915	0.949679	-1.87164	1.00831e-13	non-dropout
ZNF746	4	0	0.17788	0.0141497	-0.0900447	0.468747	-0.367902	0.0365553	-0.347987	2.91852e-05	non-dropout
CDCA2	1	0	-0.563661	5.23347e-15	-0.154541	0.0537249	-0.0710472	0.744929	0.95449	2.17813e-54	AF4 specific
TMEM65	2	0	-0.472664	1.06867e-05	-0.0779866	0.493787	0.238845	0.257275	-0.195121	0.0142018	non-dropout
ESCO2	6	0	-0.267954	0.00259394	-0.323104	2.37189e-05	0.140148	0.551086	0.81691	6.98715e-38	non-dropout
FAM84B	9	0	-0.634732	2.11848e-14	-0.566645	9.51621e-08	-0.0562605	0.823693	0.483648	1.46831e-08	non-dropout
FAM91A1	5	0	0.194306	0.00235218	-0.108514	0.225232	0.158546	0.391877	0.399758	3.00139e-12	non-dropout
MAMDC4	2	0	-0.537625	7.35504e-07	-0.382899	0.0621634	-0.417301	0.0987405	0.875652	1.69282e-06	non-dropout
TTC39B	2	0	-0.524899	0.0196179	-0.0355951	0.903388	0.435216	0.273811	-0.0858488	0.796158	non-dropout
FAM120AOS	2	0	-0.251118	0.00231983	-0.130332	0.242633	-0.268308	0.169304	0.739524	1.75924e-24	non-dropout
SLC35G1	2	0	-0.429137	0.000580654	-0.00742272	0.964347	-0.312997	0.173308	0.263752	0.0147698	non-dropout
AARS	6	0	-0.411338	1.02409e-12	-0.3661	6.2099e-07	0.0981044	0.617618	-0.284444	1.45312e-05	non-leukemia-specific dropout
DAB2	21	0	-0.939189	4.83968e-15	-1.51599	1.73606e-16	0.0897321	0.80659	0.39741	0.00090323	non-dropout
DAD1	3	0	-0.41727	7.43731e-09	-0.134134	0.164389	-0.328756	0.090516	-0.617013	2.50874e-12	non-leukemia-specific dropout
TMTC2	6	0	-0.335569	0.00411271	0.0473803	0.835498	0.241444	0.343905	0.239297	0.0599079	non-dropout
CLECL1	1	0	-0.255342	0.00405174	-0.0775475	0.461492	0.22972	0.248456	-0.533294	1.38352e-15	non-dropout
CD55	6	0	0.593075	3.08078e-11	0.0668331	0.523979	0.599184	0.00022145	0.200784	0.00473287	non-dropout
DENND5B	2	0	1.02758	5.93307e-37	0.602291	7.49628e-08	1.1399	2.11215e-11	0.19912	0.100679	non-dropout
PPTC7	3	0	-0.128864	0.0463811	-0.250593	0.000301551	-0.193823	0.28726	0.0575088	0.372374	non-dropout
DGKG	4	0	1.57144	8.33253e-47	-0.182544	0.45267	0.381056	0.147059	-0.293941	0.184966	non-dropout
DGKH	1	0	-0.267891	0.00943297	0.20592	0.0464493	0.0560093	0.822533	0.0483282	0.456094	non-dropout
GPR180	1	0	-0.453026	1.39788e-06	-0.611947	5.84172e-08	0.150846	0.536267	0.271441	0.00199386	non-dropout
CLEC14A	1	0	-1.20003	1.76758e-33	-0.0877599	0.418441	-0.91053	4.31041e-08	-0.867078	6.01228e-27	non-dropout
MDGA2	2	0	-0.647683	0.000916868	0.589715	0.00163821	0.709773	0.00396598	0.193197	0.224371	non-dropout
DAXX	2	0	-0.224613	0.00318205	-0.0355974	0.755793	-0.567731	0.00199309	-0.332368	5.55339e-06	non-dropout
SPRED1	10	0	-0.310864	2.16918e-05	-0.487381	1.9669e-12	0.218513	0.26815	-0.127922	0.170095	non-dropout
AP1B1	4	0	0.278432	0.000369466	0.429478	1.81289e-08	0.231007	0.212774	0.000920863	0.992164	non-dropout
ITPRIPL2	8	0	-0.402754	2.62197e-10	-0.0572688	0.59795	-0.353972	0.047433	-0.530785	3.50067e-15	non-dropout
C18orf54	3	0	-0.350614	0.00441472	-0.679229	2.15231e-11	0.428294	0.0427496	0.197079	0.0475994	non-dropout
DEDD2	4	0	0.226672	0.0485942	0.198258	0.244283	-0.219327	0.433869	0.160571	0.370547	non-dropout
ZNF791	1	0	-0.180818	0.0161302	-0.318862	2.28606e-05	-0.291685	0.0899909	-0.235017	0.00126434	non-dropout
ZNF433	5	0	-0.424429	0.045492	-0.294836	0.248638	-0.876806	0.0291449	2.04855	1.99279e-22	non-dropout
ZNF567	4	0	-0.304025	0.00199046	-0.450261	1.668e-06	0.0171843	0.949191	0.00805556	0.921429	non-dropout
EID2	1	0	-0.230477	0.0376976	-0.132281	0.345271	-0.354627	0.13565	0.505323	6.24849e-06	non-dropout
DCK	4	0	-0.344943	1.17278e-05	-0.150898	0.0908333	-0.188762	0.314462	-0.339195	7.94258e-06	non-dropout
CNST	5	0	-0.359673	7.90945e-08	0.532835	7.96456e-18	-0.228217	0.208244	0.261426	0.000257582	non-dropout
DDB2	1	0	0.219799	0.00967165	-0.0247548	0.848005	0.155102	0.467927	0.242108	0.0345749	non-dropout
FAM171B	1	0	-0.79688	0.000153451	-0.277553	0.254154	0.798883	0.0139992	0.755759	1.44837e-06	non-dropout
PARP15	1	0	0.500318	1.33315e-12	0.294629	0.000338872	0.696105	5.64033e-05	-0.712434	2.76152e-18	non-dropout
XIRP1	5	0	-0.96007	0.00888143	NA	NA	NA	NA	1.8764	7.85738e-20	non-dropout
PRICKLE2	1	0	0.356535	1.48111e-06	0.386299	5.46131e-06	0.470068	0.00820502	0.184328	0.0417834	non-dropout
DECR1	1	0	0.489129	2.20707e-05	0.104112	0.578944	0.187001	0.485533	-0.116542	0.426744	non-dropout
MMAA	1	0	0.337035	0.00118185	-0.000106895	0.999479	0.230237	0.353607	-0.686111	2.33235e-07	non-dropout
UGT3A2	2	0	-0.827769	3.8975e-28	-0.733566	1.26184e-15	0.185339	0.372632	-0.815828	3.50122e-14	non-dropout
ZNF366	1	0	1.65697	1.83653e-08	1.8803	4.69213e-05	NA	NA	NA	NA	non-dropout
DFFB	1	0	-0.265985	0.0445925	0.213662	0.136936	0.10105	0.730223	-0.806835	2.67743e-06	non-dropout
TIMM8A	7	0	-0.265522	0.00545053	-0.219268	0.0402304	-0.239357	0.267249	0.201511	0.0254746	non-dropout
ZNF92	3	0	-0.283734	0.0172694	-0.275675	0.0277834	0.169216	0.470866	0.783186	8.75141e-47	non-dropout
DFNA5	1	0	-0.439039	0.00293648	0.910982	1.13803e-09	-0.414853	0.112485	-2.63979	4.70849e-23	non-dropout
ZNF800	14	0	-0.233248	0.000115586	-0.179438	0.00655144	-0.182332	0.311651	0.302907	5.78743e-08	non-dropout
COCH	1	0	-0.51729	2.79559e-09	-0.2059	0.0300826	-0.257898	0.183971	-0.539559	2.23056e-12	non-dropout
TMEM64	10	0	-0.317343	0.00123052	0.00399333	0.974235	0.0375862	0.884807	0.834379	2.07922e-37	non-dropout
PWWP2B	2	0	0.441891	9.856e-05	0.308575	0.00481526	0.169848	0.452027	-2.15929	4.36303e-98	non-dropout
COMMD6	3	0	-0.337987	0.022495	-0.0789872	0.727163	-0.0839475	0.827102	0.50144	0.000733709	non-dropout
ADAMTS18	1	0	0.539828	1.04411e-14	0.400797	7.54902e-06	0.353666	0.0635831	0.343756	0.0018476	non-dropout
PPP1R18	5	0	-0.305703	0.000863022	-0.0532851	0.608097	-0.277642	0.155818	-0.752317	5.38844e-36	non-dropout
DHCR24	2	0	-0.180944	0.00921677	-0.490006	2.67613e-09	-0.3331	0.0473029	0.470478	1.83914e-11	non-dropout
DHFR	5	0	-0.271492	0.000354991	-0.435255	4.68063e-06	0.0418995	0.880566	0.170255	0.0119261	non-dropout
AFG3L1P	1	0	0.156826	0.031304	0.0753336	0.437507	0.127179	0.524645	0.246502	0.000728433	NA
NQO1	4	0	0.702385	7.86718e-07	-0.301753	0.165581	0.0116592	0.976855	-0.174536	0.202275	non-dropout
DIAPH1	6	0	-0.341943	2.9602e-10	-0.00759269	0.928364	-0.578519	4.14954e-05	-0.044055	0.462487	non-dropout
DLG1	11	0	-0.379061	1.71964e-06	0.822966	9.54262e-31	0.127444	0.513993	0.0816742	0.218839	non-dropout
DLG3	3	0	0.166622	0.0336046	-0.0942672	0.360974	0.072269	0.760816	-1.17807	3.03842e-23	non-dropout
DLX1	5	0	-0.39754	0.0285417	-1.11417	0.00135393	-0.910304	0.0157775	-1.52129	4.13284e-12	non-dropout
DLX3	7	0	-1.75938	1.37043e-09	NA	NA	NA	NA	-1.18161	0.00297956	non-dropout
DNASE2	1	0	-0.258251	0.0445487	-0.511726	0.00224592	0.278209	0.331499	-0.357052	0.0104885	non-dropout
DYNC1I1	1	0	2.29825	1.10273e-22	2.58721	3.74775e-41	0.0139844	0.981401	0.573499	0.0637954	non-dropout
DYNC1I2	4	0	0.160993	0.0367008	-0.383195	0.000503087	0.377516	0.0639225	-0.163508	0.0744659	non-leukemia-specific dropout
DYNC1LI2	8	0	0.212808	0.000531118	-0.231817	0.00146841	0.276336	0.0990445	-0.029852	0.670116	non-dropout
DNM2	14	0	-0.294736	2.6853e-07	-0.182466	0.0221687	-0.427451	0.00712103	-0.0384658	0.596081	non-leukemia-specific dropout
DNMT3B	7	0	-1.0108	2.98017e-32	-0.836096	3.31741e-15	0.0117912	0.968756	1.1846	2.58183e-34	non-dropout
DOCK1	1	0	0.314891	7.15044e-06	0.709505	2.37525e-14	-0.25826	0.225537	0.0946765	0.313595	NA
DPAGT1	12	0	-0.395155	1.57514e-06	-0.048325	0.671443	-0.436552	0.0340328	-1.36332	7.03999e-27	non-leukemia-specific dropout
ABAT	2	0	0.345636	2.75749e-06	0.61806	5.01048e-10	0.141418	0.545383	0.454109	1.25226e-05	non-dropout
DPH1	4	0	0.307173	9.03687e-05	0.119457	0.345993	-0.152908	0.504527	-0.203411	0.124922	non-leukemia-specific dropout
DPYSL2	16	0	-0.372933	2.28255e-10	-0.200781	0.0117235	-0.205437	0.281694	-0.411025	2.97793e-06	non-dropout
DPYSL3	2	0	-0.446735	2.75086e-08	-0.686538	2.44214e-14	0.185361	0.351127	-0.425654	8.65161e-06	non-dropout
DR1	6	0	-0.25678	0.000247792	-0.176074	0.0421321	-0.247406	0.158309	-0.0165974	0.833047	non-leukemia-specific dropout
JAG1	12	0	1.30169	1.89684e-05	1.71776	1.59811e-06	3.65387	7.5229e-08	NA	NA	non-dropout
ARID3A	5	0	0.840493	6.19362e-24	0.0788631	0.650823	0.850243	7.8324e-06	-0.342946	0.0107889	non-dropout
RCAN1	4	0	0.237414	0.0422081	0.373749	0.0150904	0.424254	0.118239	-0.0571647	0.801202	non-dropout
TSC22D3	15	0	-0.242468	0.0399956	-0.334043	7.57727e-05	-0.278495	0.100932	0.00479102	0.957539	non-dropout
DTNA	31	0	-0.495235	1.00031e-10	-0.13564	0.301598	0.970362	9.21473e-09	0.52913	2.64484e-11	non-dropout
HBEGF	5	0	-0.689287	1.36124e-10	-0.347232	0.00130649	-1.32292	3.36363e-17	0.0452346	0.510155	non-dropout
DUSP6	10	0	-1.41515	2.63248e-35	-0.0136892	0.926176	-0.502676	0.0237847	-0.247606	0.000492016	non-dropout
DUSP7	7	0	-0.387404	2.93128e-07	0.0794588	0.524774	-0.660519	1.02053e-05	-0.484126	9.49215e-12	non-dropout
DUT	4	0	-0.220581	0.00774924	-0.466869	2.82277e-10	-0.268431	0.133877	-0.0538315	0.464463	non-leukemia-specific dropout
DVL1	1	0	0.296089	0.00943344	-0.217222	0.0942284	-0.282832	0.226486	-0.457384	9.04918e-05	non-dropout
DYRK1A	33	0	-0.272364	6.69343e-07	-0.112158	0.0856085	-0.0795741	0.677137	-0.14264	0.0143914	non-dropout
E2F2	5	0	-0.206016	0.000880454	-0.0882267	0.331614	-0.311939	0.0897047	-1.16778	4.94322e-90	non-dropout
E2F6	1	0	0.228682	0.000913903	-0.262822	0.000111025	-0.339008	0.0594277	0.0704284	0.277532	non-dropout
GPR183	5	0	1.88047	9.3304e-68	0.476144	0.0309431	3.10643	6.52012e-31	-3.14585	6.72593e-34	non-dropout
ECHS1	1	0	0.234894	0.00277134	0.258309	0.00676491	0.0110987	0.970147	0.293049	0.000500866	non-dropout
ECM1	5	0	0.362993	0.00318542	0.206791	0.22881	-0.0738626	0.813133	-0.0153578	0.897838	non-dropout
ECT2	10	0	-0.272306	6.27735e-05	-0.282552	0.000770123	0.359062	0.0656985	-0.668238	6.97074e-26	non-dropout
EDA	1	0	-0.684274	2.05429e-13	-0.834564	1.47011e-05	0.0345796	0.918761	0.355312	0.00569112	non-dropout
ABCA1	4	0	1.28935	1.49317e-06	0.389364	0.0151978	2.3162	6.25844e-16	-0.418013	0.0771507	non-dropout
LPAR1	3	0	-0.957544	1.70128e-20	-3.02973	3.46411e-37	0.317855	0.3298	-0.584151	0.00484321	non-dropout
PHC2	5	0	-0.195814	0.00210295	0.246475	0.010448	-0.457438	0.0117194	0.880515	2.44064e-49	non-dropout
EEF1A1	12	0	-0.124556	0.035945	0.0258764	0.772138	-0.387985	0.0236857	0.31717	1.0835e-08	non-dropout
PGAM5	2	0	-0.135575	0.0446006	-0.256297	0.0036024	-0.546766	0.00059756	-0.0819258	0.244167	non-dropout
AGO4	5	0	-0.215331	0.00370324	-0.0169777	0.907405	0.282884	0.162945	-0.720811	2.42637e-15	non-dropout
EEF1B2	12	0	-0.148415	0.0393441	-0.124799	0.149317	-0.527061	0.00294906	0.291234	2.44355e-05	non-dropout
EEF2	1	0	-0.136398	0.0391993	-0.0470022	0.70846	-0.633245	0.000323639	0.502316	1.98034e-19	non-leukemia-specific dropout
EFNB1	10	0	-0.993968	1.31891e-28	-0.444316	0.00386674	-0.902929	3.96826e-05	1.08879	4.56166e-28	non-dropout
EFNB2	2	0	0.593086	1.58318e-18	0.186553	0.0713005	0.371245	0.0425629	1.68207	8.07011e-86	non-dropout
EGF	1	0	2.28462	4.45908e-28	-0.3982	0.292962	0.498161	0.329781	NA	NA	non-dropout
CELSR3	1	0	0.363488	0.0135411	0.0908158	0.473918	-0.191832	0.400111	0.302536	0.0130671	non-dropout
AAED1	1	0	0.26919	0.0333038	0.315585	0.0145397	-0.00184955	0.996318	-0.543475	1.07055e-05	non-dropout
ZNF367	19	0	-0.347931	5.43698e-06	-0.185824	0.023998	-0.153248	0.41886	-0.560397	7.04355e-25	non-dropout
EGR2	4	0	0.47049	0.00344695	-0.205429	0.367087	-0.0497939	0.891101	1.02461	2.64674e-13	non-dropout
EGR3	19	0	0.37007	0.0190043	-0.468928	0.000164012	-0.235962	0.228704	-0.848383	2.34458e-27	non-dropout
MPZL3	1	0	0.60585	1.87561e-08	0.585162	3.0063e-05	0.58361	0.0210943	-2.64772	3.34736e-38	non-dropout
AMN1	4	0	0.277843	0.044281	-0.226133	0.227918	0.785336	0.00287697	-0.139379	0.365431	non-dropout
PLBD2	4	0	0.703649	5.13652e-10	0.796714	1.3233e-06	0.473199	0.076831	-0.330432	0.0354423	non-dropout
ANO6	2	0	-0.541336	5.2536e-16	0.179372	0.0110684	0.0511311	0.808553	0.230791	0.000193368	non-dropout
ARID2	12	0	-0.797508	2.76076e-57	-0.0369362	0.655292	-0.479164	0.00129952	-0.194071	0.000310957	non-leukemia-specific dropout
PAOX	1	0	0.399287	0.015794	0.733785	4.86838e-06	0.526559	0.10845	-1.4413	1.9391e-05	non-dropout
LINC00638	1	0	-0.625394	2.30523e-06	0.0502461	0.837098	-0.152044	0.680041	0.267748	0.247097	NA
PATL2	1	0	0.586573	0.000191364	-0.21144	0.177653	0.455182	0.0907504	-0.388338	0.0319091	non-dropout
MLKL	3	0	-0.539985	2.92385e-07	-0.159782	0.264518	-0.742439	0.000319628	-1.27439	6.30351e-22	non-dropout
NLRC3	1	0	-0.432938	1.21579e-08	0.251555	0.00368349	-0.30761	0.0833042	-1.16296	2.70071e-57	NA
EIF4A2	10	0	-0.13466	0.0383073	-0.0760957	0.297265	-0.258163	0.106229	0.418151	9.9518e-16	non-dropout
EIF4EBP1	3	0	-0.582876	3.96335e-14	-0.975083	3.72037e-24	-0.22797	0.30817	-0.157028	0.145216	non-dropout
U2AF1L4	2	0	0.552068	9.37576e-08	0.288137	0.0495122	0.160006	0.564788	-1.20301	3.00305e-12	non-dropout
ALG14	1	0	-0.349177	0.025351	0.223715	0.312654	0.120369	0.719917	-1.22475	1.11652e-08	non-leukemia-specific dropout
ABCA2	4	0	0.437747	3.0595e-06	-0.225155	0.0242936	0.0895915	0.735736	-0.892195	1.8303e-26	non-dropout
ELF4	4	0	0.320249	2.98229e-05	-0.0193784	0.875842	0.511805	0.000821681	-0.641326	5.94733e-18	non-dropout
ELK1	6	0	0.168961	0.0489496	-0.0218819	0.882162	-0.298592	0.167122	0.199068	0.00961159	non-dropout
ELK3	18	0	-0.313882	4.012e-05	0.857743	3.6175e-30	0.496596	0.00426794	-1.99541	3.61568e-150	non-dropout
ELK4	5	0	0.157821	0.00569677	-0.137906	0.0770057	0.203831	0.278941	-0.145094	0.0110958	non-dropout
SPRED2	7	0	-0.169032	0.0212387	-0.341531	6.22177e-07	-0.00766832	0.976441	-0.669812	3.00098e-25	non-dropout
FBXO45	6	0	-0.173476	0.00750913	-0.455942	7.93737e-11	-0.245402	0.171876	0.433312	1.03167e-12	non-dropout
PLD6	2	0	-0.283392	0.000351932	0.090375	0.380314	-0.495749	0.00257836	-1.05473	1.60072e-50	non-dropout
ARHGAP27	1	0	0.364405	8.99117e-07	0.112719	0.240862	0.364384	0.0783725	-1.42713	1.94832e-44	non-dropout
EMP1	3	0	-0.442607	1.38051e-12	-0.913315	3.40939e-30	-0.414235	0.0129891	-1.51511	1.00463e-117	non-dropout
SLC16A13	3	0	-0.280641	0.00576133	0.10848	0.487947	-0.316087	0.262837	-0.320809	0.0950685	non-dropout
SLC39A11	9	0	0.368309	1.05412e-05	0.00630707	0.969717	-0.0180188	0.950547	0.132591	0.23935	non-dropout
RDM1	5	0	-0.618312	0.001463	-0.268492	0.230199	0.72541	0.0356015	-0.539072	0.0983003	non-dropout
SPNS3	3	0	-0.811693	3.16501e-13	-0.965404	0.000133683	1.19406	7.06432e-10	-1.80856	3.58224e-16	non-dropout
ZNF584	1	0	0.281479	0.000369906	-0.230592	0.120839	-0.306853	0.174038	0.0111929	0.931421	non-dropout
HACD2	6	0	-0.288675	0.00473017	-0.305113	0.00603261	0.148896	0.575861	0.0485749	0.683125	NA
STT3B	8	0	-0.36429	9.94344e-09	-0.146464	0.0715996	-0.244079	0.157769	0.0856783	0.154883	non-dropout
CTTN	4	0	1.81801	7.16697e-65	2.2184	1.00941e-109	2.37049	1.40327e-43	-3.32029	1.25971e-37	non-dropout
SMIM14	5	0	0.977553	1.58603e-06	2.35967	9.6789e-61	2.53452	9.82695e-17	-0.241588	0.258965	non-dropout
TAPT1	8	0	-0.941688	6.5137e-41	-0.0734018	0.347394	-0.690551	1.39165e-06	-1.32357	2.54114e-130	non-dropout
CMYA5	8	0	0.698044	0.0262028	0.225462	0.573334	0.880738	0.0558176	NA	NA	non-dropout
ENO2	1	0	0.437981	0.000631195	0.603139	0.0123169	0.190013	0.56896	0.979517	1.1319e-13	non-dropout
SLC29A1	3	0	-0.213334	0.00324606	-0.446879	6.71974e-07	-0.41009	0.0271415	0.680011	8.98303e-20	non-dropout
TUBB	9	0	-0.138008	0.0348666	-0.0676509	0.419371	-0.369228	0.0300844	-0.353434	1.47928e-09	non-leukemia-specific dropout
CCDC171	1	0	0.341687	0.000750742	0.191645	0.141578	0.50222	0.0162415	-0.24408	0.0393301	non-dropout
FAM219A	9	0	1.24149	4.79484e-29	0.518476	0.000270282	-0.0754924	0.76831	0.360871	0.0113608	non-dropout
SUSD3	3	0	0.685732	3.55297e-14	-0.0878795	0.662708	0.83426	0.000119631	-0.344262	0.0624636	non-dropout
EPAS1	13	0	0.495436	0.0441624	-0.214228	0.600945	-0.740448	0.20379	1.52808	1.57456e-09	non-dropout
EPB41L1	4	0	0.685546	6.20497e-05	-0.141697	0.733228	1.59039	0.000173232	-0.408258	0.196454	non-dropout
EPB41L2	1	0	-0.166002	0.015539	-0.410803	4.99275e-08	-0.131997	0.510828	0.198337	0.00307713	non-dropout
EPHA3	1	0	1.16058	6.37903e-10	1.84652	8.39562e-07	2.14021	1.48713e-11	NA	NA	non-dropout
EPHA4	1	0	0.615331	0.0119492	1.03929	0.00160271	1.61825	2.64668e-06	NA	NA	non-dropout
EPHA7	2	0	1.5514	5.67903e-18	-0.528769	0.138834	3.29998	1.90089e-29	1.95223	9.70363e-10	non-dropout
EPHB3	4	0	-0.226331	0.0100739	-2.18542	3.477e-24	1.30187	7.1754e-08	1.80477	4.93614e-49	non-dropout
AK4	5	0	0.554427	1.09311e-16	0.157343	0.0497652	-0.28696	0.13035	-0.668955	1.72524e-18	non-dropout
C2orf69	10	0	-0.280844	0.000674881	-0.540019	4.58231e-12	-0.198123	0.322152	0.200908	0.00105357	non-dropout
C3orf58	1	0	-0.67868	1.64426e-12	-0.00132273	0.99226	-0.00747114	0.976855	1.23258	4.0971e-98	non-dropout
CLN8	2	0	0.42151	1.13501e-10	-0.0739131	0.411139	0.0878943	0.680994	0.314726	3.73029e-06	non-dropout
EPRS	4	0	-0.298915	0.000576627	-0.50071	1.00022e-13	0.210509	0.242632	-0.00462816	0.950092	non-dropout
EPS8	4	0	-0.281869	0.00742246	-0.430745	7.21386e-05	1.00354	1.06472e-07	0.547834	2.17057e-07	non-dropout
NR2F6	8	0	0.364352	7.46845e-06	0.249371	0.0216795	-0.253207	0.261703	-0.173031	0.130456	non-dropout
SLC36A1	4	0	0.313915	8.15798e-05	-0.257933	0.00501343	0.326011	0.0780726	0.167891	0.0996018	non-dropout
ERBB2	2	0	0.333948	4.15251e-08	0.234611	0.00747748	-0.0692085	0.744865	-1.98106	1.75021e-155	non-dropout
C6orf163	1	0	0.436949	0.00389885	0.44468	0.00349135	0.574503	0.0360224	0.0727977	0.612331	non-dropout
ERCC6	3	0	0.519718	4.65608e-09	0.780626	9.61003e-17	0.50222	0.0287959	-0.133109	0.252493	non-dropout
ERF	3	0	0.210202	0.0302968	-0.239127	0.0293411	-0.474149	0.00802642	0.61419	7.76663e-16	non-dropout
ERG	3	0	-1.28053	3.67561e-117	0.299623	2.99301e-07	-1.31928	3.28278e-20	-0.338184	9.00468e-07	non-dropout
AKT2	6	0	0.212855	0.00239986	0.283548	0.000837108	-0.179864	0.324662	-0.713237	5.63712e-24	non-dropout
ERN1	7	0	0.257793	0.010046	0.0503499	0.726948	0.358909	0.0819466	1.75139	5.89557e-73	non-dropout
ETFA	3	0	0.181927	0.0153517	-0.203646	0.0372489	0.156038	0.436516	0.15643	0.049989	non-dropout
ETFB	2	0	0.315252	0.0188775	0.271224	0.0514605	0.185622	0.496811	0.0969722	0.53023	non-dropout
ALAS1	3	0	-0.184885	0.00390311	0.26766	0.00445008	0.0528365	0.818468	1.03249	1.33111e-47	non-dropout
ETV3	8	0	-0.156407	0.0239582	-0.0513309	0.632357	-0.00712835	0.977676	0.472285	6.81946e-12	non-dropout
ETV6	22	0	-0.202685	0.00153298	-0.0369123	0.736052	0.291273	0.0903277	0.262803	0.000138906	non-dropout
EVI2A	4	0	-0.440181	6.03389e-08	0.0439803	0.746217	-0.369754	0.0716204	-0.202538	0.00646478	non-dropout
EVI2B	9	0	-0.265368	0.000407759	0.36648	2.49436e-05	-0.130115	0.495603	-1.38925	7.73983e-100	non-dropout
EWSR1	5	0	0.143445	0.0312681	0.100109	0.128871	-0.0301328	0.888484	-0.214282	0.000102625	non-dropout
EXTL3	8	0	-0.162208	0.0219715	-0.175217	0.0549457	-0.110149	0.613788	-0.156913	0.154917	non-dropout
EYA1	1	0	1.26529	1.2547e-19	1.23272	5.10655e-22	2.35883	4.04266e-21	0.0842258	0.597013	non-dropout
EZH2	14	0	-0.210654	0.000364613	-0.263621	0.000744247	-0.120442	0.536615	0.24361	4.60893e-05	non-dropout
FANCA	1	0	-0.160755	0.0112619	-0.212465	0.024537	0.224285	0.190005	0.0956804	0.205311	AF4 specific
ACSL3	11	0	-0.335925	9.97719e-07	-0.231295	0.00338286	0.0897995	0.67856	0.933572	2.75885e-55	non-dropout
ACSL4	4	0	-0.209868	0.0371056	-0.029303	0.794568	0.0700131	0.771947	0.0311202	0.715675	non-leukemia-specific dropout
FAH	3	0	0.552163	9.4816e-07	0.366167	0.00673675	-0.0817004	0.787376	-0.71783	8.84525e-07	non-dropout
FANCF	1	0	-0.171739	0.00916466	-0.0759033	0.498455	-0.385379	0.0259701	-0.879668	4.14655e-32	non-dropout
FANCG	4	0	-0.244555	0.00114421	-0.203205	0.0242456	-0.338716	0.077758	0.090708	0.280725	non-dropout
ALDH1B1	2	0	-0.264461	0.000289938	-0.0170495	0.915178	-0.34914	0.0839445	-0.246883	0.00332053	non-dropout
FBLN1	2	0	-0.645433	0.01018	-0.484648	0.137802	0.478516	0.237256	-1.77356	1.7875e-10	non-dropout
SAMD9L	1	0	0.73024	1.59858e-18	-0.0246621	0.871985	0.299429	0.213864	-1.48574	5.92709e-42	non-dropout
FARSA	1	0	-0.160883	0.0471193	0.0320848	0.807443	-0.303726	0.0930227	0.474757	8.58958e-09	non-leukemia-specific dropout
USP12	4	0	0.169263	0.0152895	-0.239326	0.00225275	0.28249	0.114189	-0.171042	0.0327874	non-dropout
FASN	11	0	-0.202015	0.0338257	-0.247854	0.0101442	-0.615423	0.000397265	0.512416	1.16548e-22	non-dropout
TYSND1	2	0	-0.208363	0.00827412	0.342392	0.000277035	-0.337132	0.117021	-0.23607	0.0386439	non-dropout
CCNY	2	0	-0.250881	7.18875e-05	0.114037	0.155798	-0.211276	0.249749	0.129804	0.0935271	non-dropout
HYLS1	3	0	-0.261604	0.0001606	0.162744	0.0988445	-0.245455	0.167858	-0.0409956	0.607907	non-dropout
SLC37A2	5	0	0.76922	6.9114e-06	0.719956	0.00661139	2.17263	4.22463e-11	NA	NA	non-dropout
TMEM136	2	0	0.686678	2.44613e-24	0.713972	2.02912e-19	0.275082	0.191433	0.0102781	0.936789	non-dropout
ABCB7	1	0	0.206631	0.0141421	-0.161189	0.190512	0.185306	0.407101	-0.543359	4.75687e-13	non-leukemia-specific dropout
CYB561A3	5	0	0.428979	2.27378e-10	-0.0626809	0.5732	0.285332	0.166139	0.683056	1.73991e-11	non-dropout
SKA1	1	0	-0.30434	0.000111206	-0.445374	5.0372e-08	0.108328	0.676113	0.0319864	0.681438	non-dropout
OTUD1	16	0	-0.604885	3.33402e-27	0.290442	0.00147561	0.316237	0.0598654	0.848377	1.56774e-31	non-dropout
SLC16A9	3	0	-0.527688	0.00910859	0.175533	0.40593	0.840849	0.00167951	-0.807795	6.04561e-05	non-dropout
2008-03-01	4	0	0.288414	0.000208107	0.270648	0.000232759	-0.136468	0.498729	-0.814835	2.71557e-22	non-dropout
ZNF485	2	0	-0.322553	2.04694e-05	-0.236916	0.00929946	-0.068009	0.773207	-0.89609	7.66671e-28	non-dropout
REEP3	4	0	1.4495	2.31235e-40	-0.289978	0.00297925	1.12079	8.36137e-11	0.0139528	0.887286	non-dropout
JMJD1C	21	0	-0.488443	4.34835e-15	-0.107487	0.141504	-0.338734	0.0373746	0.0719692	0.217378	AF9 specific
NSUN6	2	0	0.192409	0.0198767	-0.0765347	0.509722	0.217534	0.26815	-0.229475	0.00359643	non-dropout
SKA3	2	0	-0.231515	0.0260794	-0.425746	6.4865e-05	0.234253	0.320165	0.488532	1.33901e-10	non-dropout
MICU2	2	0	0.28993	0.0078699	-0.062479	0.674728	0.509921	0.0130099	0.265012	0.00132479	non-dropout
CPNE2	10	0	-0.352348	3.35221e-05	0.427983	0.0005643	0.0425315	0.890268	-0.465873	0.0011703	non-dropout
CCDC162P	1	0	-1.03034	2.87357e-20	0.575332	4.59623e-07	-0.402327	0.201093	-1.58943	2.16524e-17	NA
AK9	1	0	0.403679	0.000109494	0.196299	0.182137	0.587487	0.00701952	0.0383734	0.767013	non-dropout
TBC1D32	2	0	0.23178	0.0164998	0.0656586	0.613778	0.11915	0.58497	0.0595256	0.608721	non-dropout
C6orf223	6	0	-2.05064	1.81871e-07	-0.683765	0.0453715	0.725688	0.126421	-2.15751	1.92155e-07	non-dropout
ADCY10P1	3	0	0.450539	4.04538e-05	0.162239	0.40027	0.541966	0.0592892	0.872972	3.4658e-08	NA
FGD2	1	0	0.414723	1.69537e-05	0.10463	0.53477	1.03767	2.84596e-09	-1.20877	1.37317e-12	non-dropout
PI16	1	0	-1.96941	2.83034e-79	0.17105	0.236989	-1.15278	1.99191e-09	-3.24793	7.14307e-55	non-dropout
KDM1B	4	0	0.227016	0.00909639	0.854113	1.73145e-24	0.562277	0.00221659	0.320276	0.00190979	non-dropout
PHACTR1	1	0	0.464974	3.86982e-13	0.464274	1.11166e-07	0.880756	1.45821e-07	-0.794643	9.64566e-17	NA
PPP1R35	2	0	-0.411247	0.000140731	0.27407	0.0238647	-0.634966	0.00881335	0.0703125	0.667065	non-dropout
GPC2	2	0	0.399272	0.000515493	0.145394	0.285969	-0.471683	0.0782003	0.610053	9.61506e-06	non-dropout
SDK1	7	0	-0.84171	0.00198134	2.03256	1.41621e-06	1.39386	0.0127377	NA	NA	non-dropout
FOXK1	1	0	-0.174764	0.00534894	0.166994	0.0900834	-0.164527	0.355796	-0.489706	9.306e-15	non-dropout
DAGLB	1	0	-0.428011	7.75068e-10	0.851804	1.52793e-24	-0.304859	0.115158	0.417854	3.6201e-06	non-dropout
THSD7A	14	0	0.622038	0.000122886	0.424972	0.121192	4.2813	1.1297e-70	0.428882	0.31003	non-dropout
RSBN1L	7	0	-0.326692	0.000358881	-0.0776077	0.451085	0.0862462	0.696781	0.248616	0.00679803	non-dropout
KIAA1324L	2	0	0.201414	0.0222617	-0.18394	0.0423189	0.39432	0.0488944	-0.181197	0.0539938	non-dropout
FDPS	3	0	-0.181806	0.0165955	-0.377908	0.000108788	-0.0318125	0.896555	-0.381122	2.82378e-05	non-leukemia-specific dropout
ZNRF2	1	0	-0.232592	0.0420903	0.244683	0.0169443	-0.121077	0.618958	-0.568738	9.24838e-08	non-dropout
FECH	1	0	0.325907	0.000645565	-0.104777	0.477847	0.276957	0.213147	-0.252599	0.0676679	non-leukemia-specific dropout
FEN1	7	0	-0.166084	0.00974583	-0.385172	4.04548e-06	-0.382607	0.0260011	-0.00483861	0.949898	non-leukemia-specific dropout
ALDH3A2	3	0	0.449175	7.32263e-09	0.307427	0.000213136	0.527375	0.00362593	0.243144	0.00343933	non-dropout
FER	3	0	0.151991	0.0469156	0.102426	0.280945	0.245535	0.197632	0.2488	0.000255691	non-dropout
FGF9	1	0	-0.182778	0.0138249	-0.339899	0.000111659	-0.159223	0.416805	-0.231437	0.000365578	non-dropout
FGF11	1	0	-0.354938	0.0376462	0.37562	0.0338381	-0.238153	0.567136	-0.907367	0.00738493	non-dropout
ALDOA	9	0	0.222009	0.00307157	-0.101177	0.411031	-0.646329	0.000332	0.611423	5.57223e-20	non-leukemia-specific dropout
FGFR1	4	0	-0.288503	0.00199777	0.858385	7.97875e-35	-0.00614002	0.981219	-0.0633191	0.329583	non-dropout
FGR	12	0	0.701266	3.06401e-06	NA	NA	2.54249	5.03125e-16	-4.70454	5.14528e-28	non-dropout
FHL1	1	0	-0.534029	1.64426e-12	-0.692675	1.02681e-21	-0.993706	1.1505e-11	-0.496802	3.13907e-12	non-dropout
RRAS2	5	0	-0.28412	0.00257181	-0.371752	0.00145811	0.00819919	0.979795	1.00787	2.158e-20	non-dropout
ITGA11	4	0	-0.368409	0.00778898	0.791155	1.92633e-05	0.788569	0.00970646	-0.797092	0.000633596	non-dropout
MRAS	6	0	0.543278	0.0391993	0.404138	0.281959	1.31067	0.0024252	NA	NA	non-dropout
ATF5	1	0	-0.461795	1.12902e-07	0.337382	0.0135234	-0.703627	1.76881e-05	1.07755	6.65298e-46	non-dropout
RASA3	3	0	-0.184815	0.00794999	0.25835	0.00148064	0.207428	0.297393	-0.147148	0.0420117	non-dropout
MTF2	14	0	0.147935	0.0376655	-0.0491556	0.614066	0.0532723	0.808457	-0.199024	0.00199172	non-dropout
ZNF652	6	0	0.38453	1.07461e-11	0.372469	3.79954e-09	0.197749	0.267182	-0.251218	8.35104e-05	non-dropout
RHOBTB3	12	0	0.296647	0.00130266	0.107546	0.377814	0.584596	0.00390257	-0.3466	5.26833e-05	non-dropout
DLGAP4	7	0	0.300299	0.00420699	0.537308	5.70316e-13	0.0403608	0.857732	-0.45741	1.67274e-10	non-dropout
PPM1E	5	0	-0.484654	0.0494802	1.65008	2.44667e-22	1.35812	2.69866e-05	0.467107	0.0256319	non-dropout
FRMPD1	1	0	-0.4356	0.0399391	2.09542	1.14229e-40	-0.592105	0.130373	NA	NA	non-dropout
ZNF507	4	0	-0.272679	5.14834e-06	-0.0295567	0.734098	-0.077872	0.69373	-1.40784	1.00491e-92	non-dropout
AAK1	11	0	-0.269167	1.50558e-06	-0.143255	0.106839	0.434932	0.0140634	-0.0933309	0.180969	non-dropout
CPEB3	9	0	-0.292992	0.000367819	-0.163271	0.0900394	-0.181624	0.418539	0.246935	0.00623261	non-dropout
ADNP2	5	0	-0.196608	0.00207864	-0.10735	0.192335	-0.310018	0.0590897	0.0699421	0.287725	non-dropout
CHSY1	16	0	-0.160683	0.0163869	0.0579493	0.563931	-0.363326	0.0256112	-0.524736	4.06139e-09	non-dropout
ICK	1	0	0.240922	0.00549601	-0.0703271	0.505871	0.424434	0.021286	-0.381845	8.40737e-05	non-dropout
ADGRL1	15	0	0.205059	0.0144283	0.210448	0.0769829	-0.235437	0.240361	-0.43482	4.97309e-07	NA
FASTKD2	1	0	0.193498	0.00543883	-0.0536109	0.588372	-0.0221922	0.930539	-0.165679	0.0087488	non-dropout
FKBP3	3	0	-0.234774	0.0149119	-0.31606	0.00116892	0.0613801	0.80293	0.54557	6.07324e-12	non-dropout
SEC31A	6	0	-0.247406	4.28399e-05	0.0669684	0.503547	0.0901725	0.663325	0.603279	4.23121e-26	non-dropout
PLEKHA6	1	0	0.402898	0.0446748	0.893558	0.00739051	-0.303978	0.541633	-0.286392	0.412542	non-dropout
INPP5F	3	0	0.324704	4.57679e-06	0.647531	8.81195e-16	0.53643	0.00240294	0.304122	0.0009434	non-dropout
CLSTN1	5	0	-0.270192	0.00019111	0.318052	4.34281e-05	-0.139642	0.462515	0.0972362	0.19752	non-dropout
UBOX5	2	0	0.298683	0.000342312	0.0161257	0.915889	-0.126571	0.572979	0.511588	1.53064e-06	non-dropout
ZBTB1	16	0	-0.161217	0.0209693	-0.163631	0.033485	-0.159011	0.395683	-0.119844	0.0516304	non-dropout
CEP164	3	0	0.170766	0.0348998	0.049312	0.69677	-0.0712421	0.772449	0.72116	1.94051e-14	non-dropout
DENND3	2	0	-0.431684	1.64337e-07	0.294497	3.3716e-05	-0.0277704	0.89603	-2.24456	0	non-dropout
ARSG	1	0	0.4055	0.0216812	0.711611	0.000163789	0.760002	0.00361021	-0.464272	0.136439	non-dropout
KLRK1	1	0	-0.613576	5.01276e-05	0.368734	0.00348	-0.217249	0.505652	-0.12729	0.533418	non-dropout
CD93	1	0	-0.475814	2.92448e-10	0.0901345	0.523234	0.518308	0.00583139	-2.95947	2.68702e-134	non-dropout
ATF6	4	0	0.239978	0.000304063	0.0679195	0.454415	0.0959058	0.628063	0.0686312	0.293898	non-dropout
SEPHS2	3	0	0.264931	5.94139e-06	-0.115035	0.28606	0.209895	0.269511	0.125184	0.067121	non-dropout
RAB3GAP1	3	0	0.29178	1.91916e-05	0.34442	2.79874e-06	0.32178	0.0709191	-0.482093	4.44759e-12	non-dropout
CCT5	3	0	-0.13325	0.0269073	-0.172671	0.00927933	-0.298462	0.0631339	-0.206467	0.000209467	non-dropout
FOXF2	1	0	-0.789938	3.5948e-08	0.851663	1.59198e-09	0.0110309	0.976855	-0.560001	0.00651443	non-dropout
TRIM32	2	0	-0.329276	0.000125421	0.00126504	0.99127	-0.393627	0.0299408	-0.917345	2.73284e-21	non-dropout
TPX2	3	0	-0.492058	2.80442e-18	-0.186937	0.0133884	-0.146475	0.43122	-0.251104	0.000185624	AF9 specific
PAXIP1	1	0	-0.258344	3.91619e-05	-0.314742	4.04548e-06	-0.0635337	0.762952	-0.745298	1.4339e-28	non-dropout
NT5C2	2	0	0.178866	0.00714501	0.305894	0.00157076	0.284217	0.157609	0.309241	1.82984e-05	non-dropout
TCF25	2	0	0.283086	0.000325844	0.355281	0.000548646	0.254057	0.154057	0.247717	0.00477385	non-dropout
KDM2A	15	0	0.209225	0.00300707	0.126305	0.189511	-0.213318	0.213864	0.15179	0.00799775	AF9 specific
CEP152	3	0	-0.158822	0.0463811	-0.37776	8.37308e-05	0.103069	0.635147	-0.116914	0.0577945	non-dropout
LIMCH1	1	0	0.776147	1.84645e-20	2.53619	3.00354e-150	1.59812	7.51442e-15	0.289409	0.0590496	non-dropout
ALDOC	2	0	-0.51248	5.27422e-05	0.0983335	0.695971	-0.618211	0.0356288	2.34301	5.44878e-67	non-dropout
WDFY3	9	0	-0.269554	2.81321e-05	0.0585209	0.517702	0.123903	0.503758	0.177582	0.00474751	non-dropout
DAAM1	7	0	0.445647	6.71164e-09	-0.665414	2.43e-13	0.536357	0.00274796	0.722866	1.09259e-17	non-dropout
MAPKBP1	8	0	0.560989	1.01481e-10	-0.100285	0.282035	0.215028	0.242148	0.0894379	0.241424	non-dropout
PLCH1	1	0	-1.36383	5.81337e-26	-2.06372	2.09345e-63	-0.848004	7.84515e-05	-2.28219	8.94387e-38	non-dropout
SPEN	8	0	-0.242979	1.38825e-06	-0.0344855	0.694244	-0.283065	0.0685002	-0.100304	0.0892513	non-dropout
CNOT1	4	0	-0.151001	0.0186228	0.0153323	0.86294	0.117554	0.508466	0.220313	0.00237297	AF4 & AF9
PALLD	15	0	-0.269681	6.14363e-05	-0.571023	7.34753e-08	0.0276272	0.919358	-0.117479	0.168992	non-dropout
TMCC1	1	0	-0.341824	6.77668e-07	0.0531122	0.593318	-0.0228752	0.928542	0.182866	0.0140331	non-dropout
MAST3	3	0	0.751838	3.18222e-40	-0.206682	0.0283649	0.438865	0.0102639	-0.227208	0.00334882	non-dropout
SAMD4A	1	0	-0.311139	2.90828e-05	1.3653	2.89329e-75	0.0377294	0.885393	-0.230201	0.0142777	non-dropout
PHLPP2	1	0	-0.155309	0.03112	-0.00812181	0.942939	0.0790055	0.720867	1.281	5.20841e-68	non-dropout
ZNF292	10	0	0.302756	1.02731e-06	0.0786846	0.37367	0.0632391	0.771345	-0.42492	2.75581e-14	non-dropout
WDTC1	11	0	0.280093	0.000133456	0.528758	4.11259e-08	0.0403733	0.887249	-0.116392	0.327856	non-dropout
MON2	11	0	0.143096	0.0414855	-0.0635218	0.530876	0.390463	0.0206357	0.00789895	0.927895	AF9 specific
PDXDC1	7	0	0.175109	0.00530095	0.394859	4.07709e-08	0.051135	0.804974	0.0174008	0.811775	non-dropout
KIF21B	6	0	-0.731565	2.34244e-30	-0.801969	3.16749e-19	-0.0451882	0.827666	-1.18457	1.5682e-83	non-dropout
FNBP1	3	0	0.509299	1.47297e-13	0.566717	6.67594e-15	0.407043	0.0370409	-0.160703	0.0358191	non-dropout
FOXM1	6	0	-0.313829	5.86869e-07	-0.235702	0.00148032	0.0682894	0.758361	-0.872414	3.59955e-33	non-dropout
ZSWIM8	6	0	0.473117	1.71798e-10	0.272525	0.00467951	-0.0581657	0.809926	0.379013	8.84691e-05	non-leukemia-specific dropout
GGA2	1	0	0.264431	2.45217e-05	0.312535	9.63866e-07	-0.125838	0.491572	0.245267	0.00011994	non-dropout
WAPL	14	0	-0.315803	1.03221e-07	-0.100064	0.155798	-0.0639561	0.745371	-0.537888	3.65566e-22	NA
SWAP70	2	0	0.411137	1.61151e-08	0.351166	0.000280818	0.670318	0.000555464	-0.35696	3.1156e-05	non-dropout
RRP1B	4	0	0.151037	0.0143442	0.027246	0.762102	-0.428877	0.00734789	0.0396219	0.511738	non-dropout
VWA8	4	0	0.166639	0.0250689	0.293036	0.000179052	0.14082	0.478521	0.299053	1.26196e-05	non-dropout
KDM4C	6	0	0.202644	0.00147591	0.475058	6.95317e-12	0.127622	0.514848	0.242065	0.00020089	non-dropout
ZNF423	2	0	-0.408213	1.38113e-09	0.00378839	0.977905	-0.5722	0.0016839	0.201485	0.0206	non-dropout
SIPA1L3	11	0	0.160303	0.0178509	0.310599	0.00185708	-0.164712	0.429481	0.326628	6.19527e-06	non-dropout
KIF1B	1	0	0.141921	0.0432382	0.244879	0.00190808	0.0781852	0.727197	0.232656	0.000151594	non-dropout
ZBTB43	2	0	0.213664	0.00489881	-3.5707e-05	0.999545	0.140805	0.475376	1.10681	1.94013e-70	non-dropout
AKR1B1	3	0	-0.201109	0.0141547	-0.192175	0.0493744	-0.429815	0.0189745	0.182035	0.0253534	non-dropout
FSTL4	1	0	0.929023	0.00431178	NA	NA	2.73282	3.60181e-08	NA	NA	non-dropout
RAP1GAP2	1	0	-0.573145	3.35241e-16	0.222047	0.0352353	0.879753	7.69813e-08	0.253554	0.00176017	non-dropout
TNRC6B	25	0	0.16422	0.00246933	0.122794	0.0828973	0.217073	0.189475	0.312723	1.67284e-09	non-dropout
CUL9	1	0	0.353624	1.60525e-07	0.377219	0.000114103	0.00891205	0.973136	-0.130571	0.196261	non-dropout
CLASP2	2	0	0.266476	0.000150234	0.306969	1.04981e-05	0.612359	2.90766e-05	0.152848	0.0206678	NA
PLXND1	4	0	0.511735	3.27675e-10	0.192641	0.032443	0.576214	0.000668422	-0.464829	1.09438e-06	non-dropout
EPB41L3	1	0	-1.16522	0.000173715	0.652681	0.197146	0.930285	0.135774	NA	NA	non-dropout
N4BP3	9	0	0.211294	0.0456178	-0.112093	0.302175	0.0392212	0.873357	-1.0784	3.81571e-67	non-dropout
MAST2	3	0	-0.278338	1.7264e-05	0.137955	0.114801	-0.00819082	0.974643	0.503042	4.90525e-11	non-dropout
FLII	2	0	0.31079	0.000111336	0.456104	2.08904e-05	-0.20255	0.367883	-0.212145	0.0503313	non-dropout
LRCH1	5	0	-0.318908	2.56145e-06	-0.209545	0.00966398	-0.164014	0.43122	-0.145246	0.0356447	non-dropout
FCHO1	2	0	0.261112	0.00613637	0.411832	1.56683e-07	0.278085	0.136366	-1.30691	5.72545e-43	non-dropout
FRMD4B	1	0	0.133198	0.0386717	0.861928	6.69325e-41	0.23967	0.173101	0.152161	0.0116687	non-dropout
GRAMD4	1	0	0.284907	8.78565e-05	1.57509	1.2221e-87	1.28961	4.20698e-12	-1.78313	1.33604e-47	non-dropout
CIC	6	0	0.494554	2.0933e-08	0.0766184	0.492854	0.0874867	0.698669	-0.27916	1.12589e-05	non-dropout
CLCC1	3	0	0.564093	2.04113e-11	0.402969	0.000916274	0.701945	0.00148484	0.160156	0.0588922	non-dropout
2006-09-01	9	0	0.172475	0.0143784	0.0855906	0.342176	0.113381	0.617404	0.33171	4.83536e-07	non-dropout
TBC1D9	1	0	-0.410687	4.7707e-10	-0.723696	1.04477e-20	0.549799	0.00215408	-0.350483	1.35084e-05	non-dropout
GGA3	2	0	0.195886	0.00804401	0.0693292	0.513208	-0.159677	0.41309	0.00101246	0.991972	non-dropout
MPRIP	9	0	-0.255588	1.20442e-06	-0.0664871	0.446069	0.0966911	0.59843	0.0207009	0.744625	non-dropout
SLC35D1	2	0	0.293769	1.24804e-05	0.216276	0.00263053	0.470584	0.00288044	0.341363	7.86143e-07	non-dropout
METAP1	2	0	-0.179805	0.0328228	-0.196273	0.0194385	0.107298	0.610454	-0.121657	0.0616081	non-dropout
CEP68	1	0	0.368846	9.07034e-09	-0.0650233	0.418748	-0.054625	0.79157	0.295689	9.23191e-06	non-dropout
RGL1	1	0	-0.336889	3.93038e-07	0.0521783	0.471186	0.032595	0.895404	-0.77988	2.57145e-38	non-dropout
RFTN1	5	0	-0.170161	0.00831383	0.463128	2.30727e-12	0.293674	0.102853	-0.394643	2.09498e-09	AF4 specific
LARP4B	1	0	-0.154479	0.0469175	0.0164883	0.878857	0.130951	0.492215	0.09794	0.265643	non-dropout
PHLDB1	9	0	-0.330102	0.00106826	0.272671	0.236275	-0.507483	0.0419809	-1.22034	1.88032e-18	non-dropout
UBXN4	12	0	0.321528	6.54975e-07	-0.190556	0.0135871	0.230231	0.214955	0.348184	3.80087e-09	non-dropout
CYFIP1	8	0	0.497443	1.67074e-21	0.40002	5.62315e-10	0.256639	0.141603	-0.0352516	0.627285	non-dropout
ATG4B	1	0	0.185547	0.0117389	0.334852	0.00044479	0.105395	0.631355	0.569085	1.92111e-11	non-dropout
FAM120A	2	0	-0.205632	0.000706042	-0.0662016	0.398513	0.0622851	0.754744	-0.318986	2.02432e-08	non-dropout
PSME4	6	0	0.175198	0.00470745	-0.183868	0.0245846	0.0474128	0.823693	0.186824	0.00138986	non-dropout
GSE1	13	0	0.426093	1.95985e-15	-0.0179501	0.859129	0.735231	1.92977e-07	-1.33922	1.94255e-105	non-dropout
ARL6IP1	5	0	-0.168035	0.00789284	-0.100457	0.233905	-0.0823606	0.67358	1.3302	9.40723e-126	non-dropout
MLC1	9	0	0.212632	0.00526136	-0.000290306	0.998739	-0.0328187	0.902006	-2.2619	3.12253e-84	non-dropout
ZC3H4	12	0	-0.181618	0.00297091	-0.163959	0.0704154	-0.368604	0.0210407	-0.99934	7.34933e-53	non-dropout
TBC1D1	7	0	-0.164911	0.00897302	0.482988	3.391e-15	0.199446	0.233519	-0.138028	0.0236986	non-dropout
FLT3	10	0	-0.744247	2.33938e-47	-0.137539	0.0779031	0.0287012	0.89495	0.456934	4.7036e-17	non-dropout
DTX4	1	0	1.35012	3.47213e-48	0.349893	3.17895e-05	2.37014	1.59359e-56	-1.56907	5.58491e-65	non-dropout
RHOBTB2	7	0	0.283542	0.000353786	1.23618	3.86484e-33	0.424451	0.0756679	-0.459499	3.91453e-05	non-dropout
NUP210	5	0	0.165122	0.00626976	0.13013	0.098462	0.0715614	0.720576	-0.170572	0.00695607	non-dropout
VPS13A	5	0	-0.231757	0.000133023	-0.0373438	0.703627	-0.11893	0.541615	0.0959105	0.168822	non-dropout
SEL1L3	9	0	0.22887	0.0255738	0.870366	5.01754e-16	1.6885	1.15724e-22	0.136844	0.217467	non-dropout
DNAJC9	3	0	-0.231875	0.000413684	-0.333791	1.57158e-06	-0.173148	0.337139	0.569032	6.17542e-23	non-leukemia-specific dropout
PHLPP1	19	0	-0.450556	1.12562e-18	0.119144	0.132729	-0.269052	0.0982113	0.294169	1.51649e-07	non-dropout
ANKRD28	24	0	-0.158023	0.0280052	0.272476	0.000209378	0.524024	0.00139652	-0.289171	2.58451e-06	non-dropout
PDS5A	6	0	-0.210937	0.00362091	-0.148547	0.0257387	0.14414	0.407062	0.0827175	0.153181	non-dropout
BOP1	2	0	-0.195699	0.0352062	-0.0233898	0.871985	-0.441325	0.0426836	0.090323	0.271124	non-leukemia-specific dropout
KIAA0556	5	0	0.160494	0.046184	0.273238	0.00104431	-0.166457	0.436872	0.381327	7.94765e-06	non-dropout
RPRD2	9	0	-0.186982	0.00200201	-0.0732769	0.404606	-0.0585021	0.765433	-0.661681	4.63337e-27	non-dropout
KIAA1024	1	0	0.448802	0.0309414	0.00931657	0.981243	0.320088	0.354161	0.339966	0.193771	non-dropout
MTCL1	1	0	-0.449839	2.05403e-07	0.762857	1.31586e-18	0.314747	0.117049	0.0862516	0.566519	NA
DENND5A	8	0	0.193687	0.0245265	-0.23014	0.00168651	0.0967558	0.623388	-0.241509	0.00012422	non-dropout
CAMTA1	17	0	0.342669	0.00149223	0.133494	0.381461	0.41324	0.0717801	0.0837502	0.460055	non-dropout
PPIP5K2	2	0	0.190301	0.0187695	0.060376	0.562171	0.0512063	0.807273	-0.359925	1.62222e-06	non-dropout
EXOC7	1	0	0.227755	0.0049772	0.301389	0.00150908	-0.182687	0.419616	-0.199055	0.0275992	non-dropout
ADGRL2	10	0	0.595839	0.00199046	2.09966	3.59994e-27	3.23738	9.46117e-41	-0.0690761	0.81625	NA
DNMBP	2	0	-0.189188	0.0118098	0.611632	2.58008e-15	0.106806	0.629776	0.307425	6.55759e-05	non-dropout
CAMSAP2	8	0	-0.179644	0.0378091	-0.183171	0.0249709	0.0842589	0.698403	-0.709055	8.77425e-27	non-dropout
FAM208A	1	0	-0.195139	0.0242966	-0.0964934	0.205677	0.267042	0.125342	-0.636799	5.30894e-25	non-dropout
ADGRL3	1	0	-0.560979	2.7808e-18	0.163186	0.0589165	-0.789958	1.93023e-06	0.286022	3.25502e-05	NA
IQCE	1	0	0.60578	4.79994e-05	0.804337	1.06765e-06	0.707752	0.00840282	-0.580475	0.0274513	non-dropout
FMO4	1	0	0.812843	5.02994e-06	0.898236	5.52832e-06	0.85865	0.0183305	-1.21052	1.54072e-05	non-dropout
FBXW11	6	0	-0.170815	0.0198266	0.0609222	0.452956	-0.0163463	0.946106	-0.15842	0.0200457	non-dropout
MGRN1	7	0	0.165672	0.0219498	0.320802	0.000399383	0.140643	0.481186	-0.398359	2.77328e-07	non-dropout
BICD2	3	0	-0.181276	0.00529427	-0.228512	0.00489326	-0.278877	0.101116	-0.0855825	0.219887	non-dropout
FMOD	4	0	0.935683	1.10097e-17	1.78599	3.7611e-15	0.935512	0.00855537	-2.41279	3.15114e-10	non-dropout
NCAPD3	3	0	-0.133601	0.0379183	-0.104142	0.220247	0.104609	0.583255	-0.222941	0.000413098	AF4 & AF9
SLC9A8	5	0	0.298065	5.83105e-05	0.138763	0.120068	0.114506	0.580163	-0.544498	1.5743e-11	non-dropout
ZCCHC11	7	0	0.150352	0.0472758	0.1038	0.286721	0.320346	0.0651532	-0.130239	0.0384727	non-dropout
TBC1D30	5	0	0.709659	1.04812e-16	0.868887	1.33969e-28	0.191069	0.486815	-0.837684	1.4029e-17	non-dropout
WDR7	4	0	0.205132	0.00152587	0.182506	0.0181229	0.123027	0.555396	0.395174	1.52689e-09	non-dropout
JADE2	14	0	0.54752	1.96209e-17	0.554134	6.2917e-14	-0.00183816	0.99489	-1.31551	4.07748e-44	non-dropout
DNAJC16	8	0	0.271546	9.57394e-05	0.0656045	0.553261	0.00450574	0.988189	0.446275	4.92154e-09	non-dropout
ESYT1	8	0	0.183741	0.0341271	-0.265661	8.72705e-05	-0.049402	0.815262	0.449616	8.51713e-16	non-dropout
SYNE1	2	0	0.297194	0.000162565	0.798611	2.01778e-22	0.183144	0.381469	0.25216	0.00719066	non-dropout
SMCHD1	7	0	-0.18504	0.00410325	-0.056521	0.49422	0.169898	0.341353	0.451578	1.26125e-17	non-dropout
FN1	12	0	1.59347	3.99324e-49	-0.859524	0.000280446	1.90136	9.53057e-12	0.810047	0.000182461	non-dropout
VPS8	7	0	0.243744	0.000973552	0.215322	0.00915223	0.212502	0.275784	0.29634	0.000425191	non-dropout
ANGEL1	3	0	0.160303	0.0338216	0.0384115	0.755782	-0.0276322	0.912766	0.526559	2.69663e-11	non-dropout
ARHGEF12	9	0	0.236101	0.00123922	0.37085	2.60441e-08	0.0393546	0.856984	0.00649852	0.926552	non-dropout
LARP1	8	0	-0.178409	0.00143369	-0.0809232	0.28017	-0.120077	0.516296	0.00987332	0.894224	non-dropout
PPP1R13B	3	0	0.465857	1.5952e-05	1.30244	5.98468e-14	1.08964	4.86073e-05	1.54754	2.83885e-11	non-dropout
RRP8	2	0	-0.218126	0.00165578	-0.0956814	0.312008	-0.211538	0.269235	0.145847	0.0744239	non-dropout
SRGAP2	2	0	-0.228116	0.000193638	0.0133149	0.899748	0.021517	0.929363	0.383525	7.7928e-09	NA
SPECC1L	1	0	-0.273133	3.16101e-05	-0.0854361	0.316651	-0.0814089	0.697185	0.266542	0.000668066	non-dropout
NCSTN	3	0	0.171854	0.0292212	0.108074	0.192055	-0.0325877	0.888272	-0.270503	0.000240681	non-dropout
MED13L	15	0	-0.447932	1.09951e-17	-0.363952	6.78536e-11	-0.144284	0.397684	0.177819	0.000597049	AF4 specific
KIAA0368	7	0	0.237909	3.44541e-05	0.00619425	0.956937	-0.0105467	0.966458	-0.800763	5.69358e-43	non-dropout
ADNP	21	0	-0.124493	0.0276845	-0.198317	0.00183635	-0.0530515	0.791493	-0.758687	4.67915e-48	non-dropout
NCAPH	1	0	-0.221055	0.000349311	-0.34874	2.5239e-07	0.0145668	0.953384	0.190277	0.00148712	non-dropout
PPWD1	2	0	0.201883	0.0454751	-0.166123	0.151964	0.331417	0.12119	-0.425282	2.06213e-06	non-leukemia-specific dropout
ATP13A2	6	0	-0.376085	3.31896e-06	0.00258816	0.986856	-0.283299	0.155675	-1.17197	1.49992e-46	non-dropout
FRAT2	4	0	-0.251225	0.000689266	0.00133413	0.992738	-0.482042	0.00915856	0.640482	3.82382e-16	non-dropout
FBXO46	8	0	-0.155754	0.0314056	-0.232682	0.0504418	-0.227627	0.271854	-0.166599	0.0410898	non-dropout
DICER1	8	0	0.286096	1.33246e-05	0.0673231	0.369344	0.250484	0.127609	-0.850641	3.1465e-37	non-leukemia-specific dropout
SIRT1	8	0	-0.156076	0.0228538	-0.346001	4.65481e-07	0.149086	0.441842	1.40339	2.20282e-150	non-dropout
ZFPM2	1	0	-0.93225	3.10563e-08	0.966686	3.03973e-15	-0.263818	0.324272	0.370955	0.0150045	non-dropout
TMED3	1	0	-0.185166	0.0341736	-0.0517919	0.705974	-0.0411615	0.880978	-0.256032	0.00592092	non-dropout
SF3B3	4	0	-0.116414	0.0386356	-0.171839	0.00349135	-0.116813	0.513495	-0.424094	1.8574e-15	non-leukemia-specific dropout
ABCB10	2	0	-0.462171	2.23258e-06	-0.283794	0.00201781	0.428759	0.028037	0.223021	0.0256422	non-dropout
ABCB9	2	0	0.292863	0.0371324	0.214271	0.29782	-0.472337	0.0845515	1.60893	1.06691e-25	non-dropout
ICMT	5	0	-0.199805	0.000735205	-0.388133	8.19488e-07	-0.302256	0.0831684	0.0949813	0.136314	non-dropout
CBX6	7	0	0.139778	0.0406977	-0.150912	0.148569	-0.500261	0.00613945	-0.453016	2.60371e-12	non-dropout
ETHE1	3	0	-0.268117	0.0262028	0.0243283	0.905494	-0.487168	0.0440717	1.02342	2.06812e-14	non-dropout
ISCU	2	0	0.520491	1.20098e-09	0.121717	0.237114	0.461939	0.0179144	-0.0662668	0.502272	non-leukemia-specific dropout
CBX7	5	0	0.431997	1.6291e-05	0.619334	6.1913e-07	-0.251434	0.346148	-0.784294	5.94095e-05	non-dropout
ZFYVE26	6	0	0.304384	8.10056e-08	0.0763605	0.392567	0.1766	0.319332	-1.00747	8.83571e-54	non-dropout
LRRC8B	1	0	0.15122	0.0174196	-0.0375823	0.695188	0.112811	0.565328	-0.374906	2.09443e-08	non-dropout
TTC9	1	0	-0.469256	0.00680824	1.95269	2.57137e-18	1.16119	0.00247672	-2.17264	5.03558e-07	non-dropout
SUZ12	14	0	-0.148594	0.0382481	-0.288974	1.43897e-05	0.1904	0.318984	0.0166314	0.808644	non-leukemia-specific dropout
SPIDR	1	0	0.223093	0.00234763	0.140265	0.154776	0.242548	0.174304	0.285898	0.000321937	AF9 specific
R3HDM1	6	0	0.201193	0.00252337	0.0909517	0.300324	0.299454	0.0850931	0.320502	9.67582e-07	non-dropout
ZNF281	18	0	-0.22632	0.000306582	-0.0261958	0.802358	-0.238759	0.161037	-0.250101	0.000119329	non-dropout
FOS	4	0	0.742187	1.14612e-20	-0.190225	0.300399	0.442904	0.0305814	1.93211	1.36618e-46	non-dropout
ADAT1	2	0	0.275776	0.000733039	-0.297727	0.00225298	0.138472	0.51387	0.156962	0.0511355	non-dropout
RASD2	2	0	-0.204608	0.0364457	0.200272	0.312008	0.310684	0.203447	-2.42123	3.79168e-111	non-dropout
PIGN	3	0	0.340942	0.000167596	-0.0901884	0.37902	0.227299	0.273343	0.111188	0.250337	non-dropout
SNAPIN	1	0	-0.24353	0.00547716	-0.0131079	0.935521	-0.260493	0.247431	0.623159	3.22366e-09	non-dropout
WBP2	8	0	0.324478	0.00328448	0.146693	0.218621	0.0120016	0.96881	0.559014	2.43428e-05	non-dropout
FPGS	4	0	0.372079	5.93436e-06	0.202141	0.0217306	0.0231064	0.924615	-0.179739	0.031612	AF4 & AF9
DDAH2	2	0	0.292531	0.016227	0.0134278	0.907879	-0.43311	0.0460142	-0.643726	1.29795e-16	non-dropout
DDX58	3	0	0.182989	0.0494802	-0.131363	0.253406	0.224894	0.289292	-0.668812	1.66e-08	non-dropout
PDSS1	3	0	-0.23568	0.00729203	-0.337939	0.000164012	-0.061562	0.786841	0.196958	0.00993012	non-leukemia-specific dropout
LEMD3	9	0	-0.152303	0.0271241	-0.0315936	0.729607	-0.162796	0.380745	0.144475	0.0508675	non-dropout
ORC3	7	0	0.266828	0.000617887	-0.280589	0.00449365	0.195616	0.351602	0.197699	0.0330491	non-dropout
CORO1C	10	0	0.305049	2.19047e-05	-0.465107	1.05888e-13	0.289428	0.0765166	0.0800337	0.191328	non-dropout
MKRN1	14	0	0.158571	0.0102895	0.120149	0.129696	0.00723788	0.976475	0.449774	7.5531e-13	non-dropout
SH3BP1	6	0	0.328752	0.000908568	-0.0699904	0.611082	-0.0387476	0.89853	-0.742978	2.07093e-14	non-dropout
RUSC1	8	0	-0.218656	0.0364517	-0.786041	3.83774e-08	-0.174117	0.487154	1.28239	2.96907e-28	non-dropout
SSBP2	19	0	0.45272	9.76289e-16	0.169734	0.0936787	0.398002	0.0232579	0.275705	2.24698e-05	non-dropout
NUP62	9	0	-0.159889	0.0290628	-0.201265	0.0211159	-0.361266	0.0261365	-0.407962	2.7633e-10	non-dropout
HSPBP1	10	0	0.257641	0.0196689	-0.0612801	0.735056	-0.455052	0.0370437	-0.658587	7.00873e-06	non-dropout
PPP1R15A	5	0	0.180738	0.0484006	0.184757	0.0562889	-0.475836	0.00688007	1.15198	1.04875e-49	non-dropout
PLD3	9	0	0.325526	0.0254436	0.11822	0.654155	0.273752	0.385366	0.454779	0.010439	non-dropout
SLC7A11	8	0	-0.817064	3.81104e-11	-1.51838	4.30056e-18	0.722124	0.000848601	-1.11342	1.71163e-55	non-dropout
PLA2G15	6	0	0.493625	2.29959e-11	0.348603	0.00117218	0.208987	0.352965	1.14573	2.98635e-45	non-dropout
ZKSCAN5	5	0	-0.201607	0.0043857	0.0920918	0.381461	-0.232988	0.226697	0.503595	7.68387e-13	non-dropout
TMEM2	6	0	-0.208295	0.00664423	0.452472	1.92064e-07	0.160281	0.451848	1.69961	3.0328e-89	non-dropout
SH3BP4	1	0	-0.583496	5.21233e-13	1.23657	1.47254e-47	0.220314	0.311107	-0.990081	1.01997e-19	non-dropout
GABARAPL1	2	0	1.70422	1.36302e-23	0.0664228	0.787071	-0.074134	0.854247	-0.898582	1.25097e-05	non-dropout
TMEM245	4	0	-0.177488	0.00800616	0.158852	0.0172756	0.0789427	0.683919	0.457623	1.50008e-15	non-dropout
PISD	2	0	0.179362	0.021376	-0.245646	0.00483074	-0.360166	0.0434967	-0.436483	2.28769e-10	non-dropout
IL17RA	5	0	0.186413	0.00935654	-0.0434444	0.648731	0.516962	0.00123789	-0.220895	0.00223876	non-dropout
APOL2	4	0	0.866241	8.12212e-19	0.254195	0.0620391	-0.105258	0.68243	-0.578845	9.80608e-05	non-dropout
BCL2L13	4	0	0.404719	5.10219e-10	-0.0317006	0.764722	-0.00332829	0.990218	-0.366237	2.21859e-05	non-dropout
FXN	1	0	-0.39954	9.55679e-09	-0.0742692	0.477847	-0.261064	0.217943	-0.468788	6.55446e-12	non-dropout
ALOX5	7	0	0.869338	3.38467e-11	NA	NA	2.51733	4.94467e-06	NA	NA	non-dropout
KIF4A	1	0	-0.3216	6.4643e-06	-0.106978	0.205347	0.0586934	0.817107	-0.0253939	0.7781	non-dropout
LAMP5	11	0	-1.42292	5.91961e-122	-0.309687	0.000255159	-0.387259	0.0273509	0.0195213	0.808632	non-dropout
FJX1	1	0	-0.554763	1.4325e-17	-0.112846	0.375916	-0.793344	8.20408e-06	-0.698444	1.65432e-20	non-dropout
ZNF318	4	0	0.627512	2.06683e-31	1.6203	1.62289e-136	0.727359	2.96235e-07	-0.487044	2.03406e-13	non-dropout
CNPY4	1	0	0.384999	0.0168466	0.0458725	0.867289	-0.127504	0.735857	0.76789	0.000929385	non-dropout
PELI3	2	0	0.431942	3.49096e-06	0.525476	2.90604e-05	-0.0385845	0.906306	0.482973	0.000293491	non-dropout
FTL	8	0	0.188171	0.0255405	-0.112203	0.32994	-0.366251	0.0488867	1.01964	7.02688e-42	non-dropout
FUCA1	3	0	0.613435	5.76163e-10	0.534379	2.31838e-05	0.63481	0.00382798	1.29798	3.45073e-24	non-dropout
FUT4	5	0	-0.606916	2.7423e-31	0.29112	7.57755e-06	-0.202257	0.245496	-0.140005	0.0154155	non-dropout
FUT8	7	0	-0.263524	4.84918e-05	0.103682	0.191998	-0.324612	0.0539392	0.225008	0.000367859	non-dropout
HCG27	2	0	0.28638	0.00941785	0.146712	0.268663	0.693199	0.00833186	0.3233	0.0598881	NA
PRR14L	1	0	-0.180846	0.00198933	-0.152476	0.0166845	0.108293	0.556748	0.338155	2.78141e-07	non-dropout
FYN	7	0	-0.225684	0.00520586	-0.166765	0.156447	-0.0254932	0.921675	0.361202	1.86392e-05	non-dropout
FZD2	11	0	0.237874	0.0491579	-0.0801876	0.590838	0.113898	0.684198	-0.947873	4.75765e-08	non-dropout
SLC25A30	4	0	0.288427	0.0087547	-0.129862	0.328021	0.390359	0.0753431	2.36847	4.55794e-147	non-dropout
ANKRD18A	1	0	0.534591	0.0381602	0.220232	0.324105	1.22702	6.22511e-07	-0.301327	0.0402405	non-dropout
IFI6	8	0	0.580975	0.038568	-0.691144	0.0656409	NA	NA	1.68141	2.39948e-16	non-dropout
WDR27	1	0	-0.3763	3.47893e-05	0.0455168	0.72648	0.0488532	0.845927	0.401511	0.000633373	non-dropout
KCTD13	3	0	0.431665	4.70447e-07	0.10687	0.48007	0.216509	0.309286	0.443301	3.37242e-05	non-dropout
BRWD3	1	0	0.283928	2.27034e-05	-0.0350312	0.782287	0.352792	0.0893962	-0.4	2.68836e-08	non-dropout
EHBP1L1	1	0	0.321524	0.00124457	0.364744	1.00039e-05	-0.118099	0.572472	-0.841132	1.12516e-34	non-dropout
NIFK-AS1	1	0	-0.205815	0.0403931	-0.225577	0.046134	0.276449	0.225194	-0.421647	0.000968074	NA
MCM9	2	0	0.153289	0.0172353	-0.0460287	0.569843	0.101722	0.594624	-0.243293	5.41307e-05	non-dropout
SLC41A1	1	0	0.208461	0.00429715	0.106649	0.268897	-0.321456	0.0864988	0.754432	6.76011e-31	non-dropout
ZDHHC23	1	0	0.793035	5.65864e-06	1.16993	8.85372e-09	0.66751	0.0423494	-0.837738	0.00204324	non-dropout
TMCO4	1	0	0.317156	0.00030104	0.428877	5.98852e-06	0.0909799	0.693405	-0.206314	0.0811591	non-dropout
MCOLN2	1	0	0.562774	3.10998e-15	0.633168	2.51126e-17	1.19562	4.21898e-15	-0.228126	0.0170739	non-dropout
GABPB1	30	0	-0.198503	0.00339704	-0.139516	0.105415	-0.130812	0.498944	0.123358	0.112364	non-dropout
GABRA3	1	0	-0.75304	0.0378744	1.0147	0.012551	2.29076	6.41819e-06	0.214098	0.531311	non-dropout
COL24A1	1	0	1.32872	4.64207e-09	-1.71158	1.4796e-06	2.18228	1.58635e-10	0.52047	0.0497525	non-dropout
CNEP1R1	3	0	-0.201248	0.031879	-0.148189	0.201171	0.0974477	0.696028	0.139338	0.182001	AF9 specific
PAN3	1	0	-0.225541	0.000360137	-0.175467	0.0263042	-0.0419089	0.834687	-0.529297	1.55262e-19	non-dropout
NAPSB	3	0	0.470379	0.00392904	-1.85007	0.000184103	2.46091	2.05183e-08	NA	NA	NA
NATD1	1	0	0.458501	0.000250489	0.426133	0.000285946	0.0309583	0.939205	2.05955	6.63759e-39	NA
SCML4	1	0	0.817799	1.96119e-17	1.24132	1.17649e-39	0.0441808	0.888047	-0.301156	0.250029	non-dropout
ST6GALNAC3	1	0	-0.338394	0.000319215	-0.0384426	0.877313	0.317824	0.224921	0.492747	1.84422e-05	non-dropout
SERINC5	2	0	-0.432962	1.85529e-13	-0.111304	0.158733	-0.538447	0.000728263	0.0119215	0.857003	non-dropout
FAM133B	1	0	-0.213576	0.0443143	-0.312578	0.00372635	-0.0229997	0.936636	0.43354	1.42252e-08	non-dropout
DSTYK	6	0	0.539862	2.72786e-11	0.689833	9.11805e-15	0.583903	0.00255797	0.0230182	0.833624	non-dropout
RAD54B	4	0	-0.356984	0.0082188	-0.313448	0.00333548	0.339408	0.122827	0.60022	4.10008e-08	non-dropout
CFAP45	1	0	0.559983	0.00367509	0.021982	0.945932	0.230002	0.642795	0.228237	0.288991	NA
PGLS	2	0	-0.240756	0.00461087	-0.0469037	0.739151	-0.0884713	0.730223	-0.550732	2.32326e-07	non-dropout
BAMBI	3	0	-0.77882	8.10954e-05	-0.0564904	0.850562	-0.0298816	0.943585	3.36803	1.13641e-65	non-dropout
GALC	4	0	0.240385	0.00352496	-0.255081	0.0041354	0.232302	0.303276	-1.2398	1.73837e-34	non-dropout
TNFAIP8	4	0	-0.278055	0.000238028	-0.513114	3.22902e-10	0.284361	0.179751	-0.149094	0.0875692	non-dropout
NOCT	3	0	-0.441186	1.80088e-11	-0.127377	0.282286	-0.543765	0.000932745	1.25619	1.85354e-86	NA
TMEM184B	6	0	-0.424966	1.01164e-11	0.33904	0.000127814	-0.430559	0.0173937	0.751087	1.04489e-17	non-dropout
ABTB2	4	0	0.836043	6.10152e-08	0.579763	0.0157962	1.73927	1.20653e-08	1.25618	1.77514e-07	non-dropout
ASF1A	2	0	-0.189557	0.0276431	-0.276861	0.00244345	-0.603247	0.00104273	0.822109	3.02287e-33	non-dropout
PP7080	1	0	-0.436904	6.77381e-11	-0.113566	0.242405	-0.219763	0.329406	-1.00209	1.0329e-34	NA
ANAPC13	4	0	0.281941	0.000673692	0.0544307	0.603508	-0.231962	0.24763	-0.796308	5.15844e-21	non-dropout
MPC2	11	0	0.265094	0.00682915	0.151433	0.1289	-0.00651844	0.983673	0.520696	1.79791e-09	non-dropout
GALNS	4	0	0.282979	0.00885559	0.461934	4.22912e-05	-0.0366625	0.900486	0.019525	0.880152	non-dropout
TMEM186	1	0	-0.283724	0.00224139	-0.00202134	0.990293	-0.362267	0.0853043	-0.283522	0.0388469	non-dropout
ZNF473	3	0	-0.205992	0.00122863	-0.214638	0.0163333	-0.234831	0.205531	-0.0676747	0.351304	non-dropout
GALNT2	5	0	-0.317405	1.01903e-08	0.101942	0.154391	-0.862152	3.37748e-10	0.243946	3.44173e-05	non-dropout
MTHFD1L	1	0	-0.203282	0.00818797	-0.116872	0.255719	-0.052614	0.813133	-0.594392	8.85642e-22	non-dropout
AHCTF1	4	0	-0.149375	0.0279959	-0.280964	1.76036e-05	0.119694	0.549097	0.465708	1.50214e-17	non-dropout
DPCD	3	0	0.519861	0.00467843	0.491582	0.0770333	-0.271282	0.485819	-1.95932	7.47559e-10	non-dropout
NDUFAF3	14	0	0.279566	0.00154656	0.291317	0.00152066	-0.546836	0.00518566	-0.63011	7.21544e-12	non-leukemia-specific dropout
GALT	8	0	-0.17963	0.0344423	0.376744	0.000315864	-0.420217	0.0411501	1.26244	1.77982e-50	non-dropout
SGMS1	6	0	-0.491931	3.05463e-09	0.653043	2.65916e-16	-0.343145	0.0778185	0.439561	2.96217e-09	non-dropout
MYRIP	1	0	0.38879	1.33615e-05	1.0389	1.49666e-35	0.530892	0.00873429	0.454594	7.94765e-06	non-dropout
ZNF521	26	0	1.12634	7.15618e-10	4.81818	0	3.34559	1.44518e-42	-0.161665	0.57457	non-dropout
ASPM	1	0	-0.522868	1.07018e-14	-0.239147	0.00311368	0.206166	0.292238	0.277298	2.18863e-07	non-dropout
BOD1L1	4	0	0.151798	0.031246	0.0741839	0.523846	0.350367	0.0500892	-0.285783	2.93121e-07	non-dropout
GAMT	1	0	-0.354334	0.00469885	0.425865	0.00344011	-0.612127	0.00881717	0.252785	0.0680158	non-dropout
PTPN23	4	0	0.202	0.0157196	0.176714	0.0931368	-0.155436	0.450483	0.262552	0.00199009	non-dropout
CLIC4	2	0	-0.291326	3.91505e-05	-0.383976	1.27505e-08	-0.225281	0.179667	-0.400896	1.07847e-10	non-dropout
WWTR1	1	0	-1.1311	0.000652817	1.77754	0.00156507	NA	NA	NA	NA	non-dropout
SAMHD1	7	0	0.576483	6.25357e-13	0.26275	0.0142213	1.36713	1.54968e-16	-0.573124	1.19935e-11	non-dropout
SIN3A	12	0	0.179622	0.00211441	0.0694096	0.35713	0.0987195	0.585366	-0.314337	1.86386e-07	non-leukemia-specific dropout
C20orf194	2	0	0.218807	0.000728227	0.307595	5.19739e-06	0.175137	0.364645	0.333741	3.24366e-06	non-dropout
KBTBD2	1	0	-0.180428	0.00989052	-0.0325888	0.71443	-0.0614497	0.77209	-0.191658	0.00184184	non-dropout
GANC	4	0	0.17503	0.0190123	-0.101858	0.407174	0.337856	0.0668322	0.0764657	0.422231	non-dropout
KANK2	2	0	0.323586	0.000572428	0.955256	6.45744e-37	0.61357	0.00174769	-0.11718	0.210868	non-dropout
ADGRA2	3	0	-2.54991	4.9701e-09	-0.186847	0.568635	0.287463	0.55794	0.0800009	0.806494	NA
TMEM87A	3	0	0.136615	0.0448419	-0.0803076	0.336697	0.078772	0.721127	0.375943	4.55944e-09	non-dropout
SH2B1	9	0	-0.418654	1.35739e-07	-0.178907	0.0185254	-0.547177	0.00129952	-0.614432	2.40416e-19	non-dropout
TIPARP	3	0	-0.455486	2.93129e-12	-0.264359	0.000768343	0.0527327	0.811991	1.35	6.88677e-128	non-dropout
DNAH1	1	0	0.169409	0.0212642	0.362984	2.91762e-05	0.127584	0.528573	0.059916	0.545687	non-dropout
SPATS2L	8	0	-0.284581	0.00698439	1.18917	1.21687e-49	0.274018	0.165506	0.0746138	0.393263	non-dropout
TENM4	2	0	0.816019	3.03831e-32	2.70927	9.76525e-275	0.950216	1.25903e-09	0.338568	0.000331953	non-dropout
NSMF	1	0	0.414717	7.86493e-05	0.148179	0.187746	-0.345772	0.122042	-0.0464984	0.559353	non-dropout
LRIG1	7	0	-0.233928	0.00184331	1.27557	3.04104e-88	-0.338849	0.0601487	-0.107867	0.428556	non-dropout
LRP10	4	0	0.178064	0.0367109	0.327734	3.61573e-05	0.260851	0.143024	-1.15875	3.71087e-65	non-dropout
PTCD1	1	0	-0.601728	0.0453235	-0.316546	0.176805	-0.601334	0.22341	0.500337	0.098618	NA
ACOT11	1	0	-0.330275	0.0342041	0.486069	0.141406	-0.252923	0.556748	-0.663987	0.00315989	non-dropout
ATRNL1	1	0	0.132347	0.0401367	-0.0275711	0.797195	0.343761	0.0732961	0.169568	0.0291414	non-dropout
IPCEF1	4	0	-0.342913	0.00188574	0.772612	1.67413e-19	1.16859	3.4015e-10	0.320439	4.72147e-05	non-dropout
GLCE	4	0	-0.28607	0.0180461	0.136909	0.308662	-0.173542	0.490157	1.6915	7.68009e-26	non-dropout
SIPA1L1	1	0	0.15923	0.0314303	0.528037	8.31397e-15	0.221508	0.224987	0.192837	0.00579143	non-dropout
SS18L1	4	0	0.170041	0.0192716	-0.105751	0.275827	-0.0913774	0.664745	0.443066	6.3634e-11	non-dropout
MAGI3	8	0	-0.279481	8.23316e-05	0.12327	0.175548	0.129844	0.576518	0.435767	4.52541e-08	non-dropout
PPP1R16B	1	0	-0.166007	0.00841229	0.0888285	0.234391	0.303156	0.0623762	-0.639528	9.91537e-15	non-dropout
SENP6	8	0	-0.350679	5.98725e-07	-0.0110948	0.929064	-0.0458849	0.853942	-0.701398	3.72731e-34	non-dropout
RAI14	9	0	-0.549839	1.44273e-05	-0.215166	0.146925	0.499781	0.028733	-0.00207092	0.986837	non-dropout
ARHGEF26	1	0	-0.476585	0.000735246	-0.568528	0.000380387	0.496526	0.0300877	0.469841	2.44983e-05	non-dropout
GGA1	4	0	0.324196	3.2846e-05	0.328503	0.000144657	0.23146	0.248582	-0.522421	2.03098e-10	non-dropout
ABHD12	5	0	-0.226632	0.00293818	-0.0900764	0.491737	-0.114689	0.600531	0.475575	9.18731e-08	non-dropout
SZRD1	3	0	0.151593	0.0161286	0.0466979	0.68857	-0.260478	0.143722	-0.23471	0.0003863	non-dropout
WIPI2	3	0	0.35234	2.12871e-07	0.066143	0.547597	0.31552	0.142517	0.761255	3.39544e-14	non-dropout
CCDC69	4	0	0.154684	0.0100408	-0.227647	0.0132038	0.462951	0.00807337	-0.614183	1.19888e-15	non-dropout
TANC2	1	0	-0.283693	5.52574e-06	1.0947	6.1187e-69	0.359838	0.0266354	0.446101	8.06921e-13	non-dropout
LDLRAP1	7	0	0.554195	3.59863e-19	0.0727228	0.533153	0.245141	0.170759	-0.795976	3.37086e-18	non-dropout
GAPVD1	1	0	-0.229956	7.36074e-05	0.0818517	0.26798	-0.216756	0.206007	-0.419302	1.50907e-12	non-dropout
SERBP1	7	0	-0.167036	0.00348719	-0.141345	0.042776	-0.0938298	0.613793	-0.0189882	0.75868	non-dropout
ZBTB20	17	0	0.206426	0.00113133	0.315973	0.000821982	0.593773	0.00216315	0.309487	9.12104e-07	non-dropout
PHF19	8	0	0.161868	0.00838153	0.214573	0.00160986	0.319605	0.0694214	-2.36006	2.29307e-249	non-dropout
RIBC2	1	0	-0.236308	0.0293554	-0.165306	0.37312	0.271899	0.355513	-1.36024	1.11017e-12	NA
ABCA12	1	0	-0.56419	0.0451093	-0.229588	0.600965	1.29289	0.00076871	-0.23507	0.550401	non-dropout
RSL1D1	2	0	-0.188058	0.00122756	-0.138966	0.13848	-0.132986	0.499692	-0.0926055	0.169498	non-leukemia-specific dropout
SENP3	3	0	0.350731	0.012972	-0.0735206	0.684327	-0.5577	0.0304226	-0.481076	0.00407355	NA
GARS	1	0	-0.339349	1.91439e-07	-0.64474	2.42196e-21	0.0781744	0.703668	0.117667	0.0775977	non-dropout
TMEM251	2	0	-0.355872	0.000718166	-0.0290384	0.875013	-0.051532	0.870636	0.700782	8.65876e-10	non-dropout
GAS1	2	0	-0.867535	4.54206e-44	0.51874	7.76001e-08	0.652007	2.74208e-05	-0.58166	8.03688e-14	non-dropout
PTPN22	7	0	1.51361	1.05244e-39	-0.429871	0.00286	1.48156	8.67686e-12	-1.93532	5.15015e-65	non-dropout
AMD1	14	0	-0.186547	0.00166603	-0.184158	0.0207058	-0.270316	0.109437	0.625262	2.37432e-31	non-dropout
SPAG8	1	0	0.830701	0.000165109	0.937008	0.000574373	0.6019	0.152584	-0.205525	0.580399	non-dropout
FBXL3	2	0	-0.163452	0.035872	-0.194999	0.0347673	-0.0520687	0.833499	0.128973	0.0847733	non-dropout
PHGDH	6	0	-0.577255	6.39935e-22	-0.886702	4.96296e-25	-0.0316586	0.88359	0.242355	0.000289287	non-dropout
FBXL5	6	0	-0.233028	0.00416097	0.234511	0.000994188	0.226392	0.212998	0.143947	0.0649219	non-dropout
FBXL4	3	0	0.249515	0.00140276	-0.203374	0.131273	0.491504	0.00703963	-0.280738	0.000152371	non-dropout
BLOC1S6	2	0	0.251882	0.000687556	-0.150058	0.142932	0.46382	0.0303607	0.0344076	0.662012	non-dropout
FBXO25	1	0	0.241801	0.00591343	0.434161	1.60363e-05	0.22183	0.324662	-1.45327	9.56264e-48	non-dropout
TSPAN17	1	0	0.435691	0.000482364	0.146926	0.300324	-0.12002	0.662878	-0.327436	0.00611168	non-dropout
FBXO10	1	0	0.289434	0.0147057	0.265394	0.0457194	-0.0384706	0.904194	0.696159	0.000190302	non-dropout
FBXO5	2	0	-0.643962	3.07583e-21	-0.346689	1.36424e-05	-0.221496	0.244899	0.143025	0.017714	non-dropout
AK5	1	0	0.598244	8.90844e-19	1.24227	1.45516e-37	0.345808	0.101145	-1.38031	1.74842e-34	non-dropout
GBA	8	0	0.325467	0.000138645	0.118474	0.456639	-0.00457568	0.988578	0.0784959	0.626238	non-dropout
GBGT1	1	0	-0.291181	0.000171679	0.568093	9.25324e-10	-0.320312	0.118011	0.71156	6.16436e-20	non-dropout
GBP2	1	0	1.17081	1.43123e-33	2.47816	1.64965e-127	1.25046	1.17694e-05	-1.41439	4.14341e-11	non-dropout
GBP3	1	0	0.281379	0.00534729	0.00724704	0.964347	0.0176169	0.955346	-2.84842	4.71881e-103	non-dropout
GCDH	2	0	0.314516	0.00367509	-0.0165483	0.90778	-0.0747728	0.779853	1.47091	1.31444e-31	non-dropout
PTPN18	1	0	-0.362257	5.131e-07	0.0790746	0.45267	-0.0765187	0.724567	-0.186173	0.0145871	non-dropout
KAT2A	1	0	-0.299786	0.000259652	-0.0407424	0.780012	-0.409493	0.0457993	-0.976359	8.77509e-17	AF9 specific
GCNT1	1	0	0.534049	5.24637e-12	0.785689	1.82917e-32	1.13692	7.06999e-15	0.170416	0.0546365	non-dropout
NARF	9	0	0.406486	5.35703e-08	0.35367	3.13798e-06	-0.0397383	0.869621	1.24747	2.64839e-70	non-dropout
SLC17A5	2	0	0.374029	1.40663e-07	0.626273	7.23512e-14	0.00670476	0.982621	-0.369355	7.27566e-05	non-dropout
CNNM3	5	0	0.220861	0.0081717	0.169785	0.0927993	0.108378	0.626024	0.560012	2.482e-10	non-dropout
MYOF	8	0	0.592238	0.0487219	-1.08362	0.0313674	2.67401	2.30127e-06	NA	NA	non-dropout
GCNT2	4	0	0.424668	3.8433e-08	-0.160066	0.185246	1.10833	7.14625e-10	-1.0649	6.5827e-19	non-dropout
INTS6	13	0	-0.222747	0.00353003	-0.262585	0.00159079	0.167697	0.407422	-0.157671	0.0262514	non-leukemia-specific dropout
LATS2	11	0	0.32435	0.0123691	0.0781223	0.578944	0.661074	0.0072693	-1.32206	1.64332e-14	non-dropout
GREM1	1	0	-0.536398	3.1981e-19	-0.43289	1.62511e-06	-0.500853	0.0016374	-1.20258	4.82833e-92	non-dropout
CKAP2	3	0	-0.197617	0.0106528	-0.0710054	0.485217	-0.0720217	0.741379	0.618717	1.2719e-24	non-dropout
GFI1	17	0	0.143952	0.0185534	0.399106	1.89853e-07	-0.178968	0.346889	-1.29335	3.51276e-67	non-dropout
NUFIP1	3	0	0.226242	0.0281481	-0.297852	0.020873	0.0137245	0.964594	-0.136993	0.133041	non-dropout
AMH	5	0	-0.337999	0.00578427	0.0107368	0.960488	-0.521675	0.0196855	0.0840882	0.542942	non-dropout
B4GALT1	6	0	0.421932	1.76657e-08	-0.242992	0.00310223	0.27393	0.115625	-0.241183	0.00039875	non-dropout
COPG2	2	0	0.175593	0.0433238	-0.0389938	0.766395	0.0252248	0.924437	-0.259481	0.00780591	NA
SEC22A	4	0	-0.224036	0.0398777	0.0491876	0.772195	0.609355	0.00211385	0.390271	0.00022718	non-dropout
CYFIP2	1	0	0.32305	4.3324e-08	0.228938	0.000978709	0.0928366	0.616789	-0.257921	8.28233e-06	NA
CNPPD1	3	0	0.247045	0.00159595	0.219978	0.024739	-0.155355	0.469527	-0.106659	0.266965	non-dropout
ATP2C1	4	0	0.203153	0.0126174	-0.0911758	0.321044	0.0697757	0.750173	-0.577207	4.67128e-17	non-dropout
TRMT2A	13	0	-0.176417	0.0172107	-0.0619296	0.636067	-0.526871	0.0182961	-0.134422	0.108863	non-dropout
PPA2	3	0	0.289534	0.00112986	0.107522	0.390078	0.115206	0.614482	-0.0820363	0.426976	non-leukemia-specific dropout
GHITM	7	0	0.14548	0.043165	-0.191139	0.0161468	-0.172848	0.357177	0.13982	0.0462679	non-dropout
VPS41	5	0	0.2478	0.00241165	0.234475	0.00886235	0.395861	0.0437896	0.0428874	0.664719	non-dropout
RPUSD2	2	0	-0.252781	0.000402845	-0.104576	0.369328	-0.647057	0.00016454	-0.000598379	0.995685	non-dropout
ST6GALNAC4	1	0	0.329169	0.00397595	0.180069	0.114521	0.356495	0.0726454	-1.08552	5.81582e-30	non-dropout
TAF5L	7	0	-0.236469	6.47319e-05	-0.189997	0.0107288	-0.220799	0.210159	0.169588	0.00704784	non-dropout
CACYBP	5	0	-0.298469	1.92221e-05	-0.243393	0.00383071	-0.0953168	0.659373	0.39411	1.05913e-08	non-dropout
ARRDC2	6	0	0.235044	0.00421603	0.211079	0.0384054	-0.177076	0.39832	-0.125827	0.101124	non-dropout
ATP5S	3	0	0.23423	0.0234417	-0.11646	0.299316	0.240565	0.236497	0.244119	0.00285306	non-dropout
BBC3	2	0	-0.293715	0.0186673	-0.463095	2.69453e-05	-0.245249	0.272262	0.2891	0.00617693	non-dropout
PDE7B	8	0	3.22763	2.39756e-33	NA	NA	NA	NA	NA	NA	non-dropout
AFF4	7	0	0.143071	0.0125698	-0.100746	0.196493	0.167068	0.355399	0.439419	2.79692e-16	non-dropout
CYTH4	1	0	0.222761	0.00458838	-0.36474	0.00123102	2.30356	1.00694e-47	-2.34831	3.13419e-66	non-dropout
HSPB7	1	0	0.22467	0.000986847	-0.439412	2.18236e-07	0.36066	0.0999011	-2.77145	2.92019e-122	non-dropout
INVS	4	0	0.264949	0.0072233	0.0322862	0.788954	0.190942	0.370829	0.0679513	0.493982	non-dropout
SNX5	9	0	-0.247589	6.29702e-05	-0.0357172	0.707744	-0.228295	0.170885	0.346892	9.30755e-11	non-dropout
NDOR1	3	0	0.358671	4.5225e-05	-0.0952291	0.459066	-0.204458	0.324406	0.342759	0.00010192	non-leukemia-specific dropout
AGO2	4	0	-0.161136	0.0135855	0.417987	2.24455e-10	-0.168558	0.336116	-0.405845	4.61308e-08	non-dropout
GLA	8	0	0.303432	0.00185759	-0.0569556	0.703555	-0.141661	0.546006	0.482554	1.40269e-06	non-dropout
TUBG2	3	0	-1.09128	0.000289938	NA	NA	NA	NA	NA	NA	AF9 specific
AMPD3	1	0	-0.596382	2.09625e-17	0.0924303	0.456203	0.642663	0.000306464	-2.13913	5.69606e-71	non-dropout
GLB1	1	0	0.190246	0.0188085	-0.187764	0.0574279	0.220429	0.292869	0.374817	0.000356695	non-dropout
SERP1	5	0	-0.257525	0.000157705	-0.121895	0.157568	-0.551142	0.000422204	0.495588	5.13825e-20	non-dropout
TNFRSF21	7	0	0.224926	0.0213562	0.00413236	0.978164	-0.158236	0.476682	-0.385081	1.02989e-06	non-dropout
PCDH17	1	0	-0.759916	0.0453397	NA	NA	1.6132	0.00050669	3.46469	4.01875e-33	non-dropout
GCLC	7	0	0.275707	8.47097e-05	-0.128981	0.193863	0.16402	0.41815	0.78086	1.062e-32	AF4 & AF9
R3HCC1L	5	0	0.538387	5.03188e-22	0.359709	2.55642e-08	0.206072	0.236284	-0.423102	1.73642e-10	non-dropout
DIMT1	2	0	-0.291644	0.000221126	-0.2512	0.00794889	-0.333514	0.0734981	0.816387	6.29018e-38	non-dropout
GCLM	7	0	0.45007	2.44514e-07	-0.107946	0.516658	0.293934	0.204855	-0.0562629	0.573954	non-dropout
MOCS3	3	0	-0.172013	0.0373777	0.0358492	0.817023	-0.558155	0.00228102	-0.00423193	0.970636	non-leukemia-specific dropout
GLDC	2	0	1.27347	7.45503e-75	0.118565	0.253363	0.663821	0.000124346	-2.24794	1.20179e-83	non-dropout
RAB30	1	0	0.388818	0.0115465	-0.819685	4.80412e-18	0.337502	0.143728	-0.699453	5.1495e-14	non-dropout
RBMX	6	0	-0.271674	9.91621e-07	-0.0695211	0.392166	-0.187635	0.260425	0.0610989	0.308652	non-leukemia-specific dropout
UBE2S	5	0	-0.396465	4.80643e-05	-0.142155	0.245641	-0.499329	0.0127781	0.945571	4.91432e-34	non-dropout
TMEM97	1	0	-0.262637	0.000803151	-0.696748	4.61458e-17	-0.502572	0.0012247	0.0296917	0.694251	non-dropout
SGSM3	1	0	-0.191767	0.00768356	0.0140699	0.923458	-0.295657	0.17601	0.106342	0.392933	non-dropout
GLI3	1	0	-0.614673	6.02441e-18	-0.180386	0.0894672	0.323207	0.0991849	0.455791	6.98611e-08	non-dropout
GLO1	3	0	-0.219303	0.00473148	-0.543436	6.02423e-11	-0.0166775	0.94615	0.194528	0.00516744	non-dropout
HTRA2	7	0	-0.218082	0.0164847	-0.16182	0.148136	-0.475377	0.028011	-0.562337	1.70025e-06	non-dropout
POLM	1	0	0.231364	0.00203991	0.463794	3.54052e-07	0.235329	0.256926	0.467902	1.44203e-05	non-dropout
PCLO	1	0	0.476599	0.00167771	0.707383	4.24507e-05	0.748405	0.00646139	0.441611	0.0156756	non-dropout
GLRX	1	0	0.245049	0.0168465	0.856775	6.13371e-24	-0.0222767	0.940912	0.452129	0.000275926	non-dropout
GLUD2	3	0	-0.207461	0.0429996	-0.238001	0.0949067	-0.366561	0.109224	-0.239484	0.0825458	non-dropout
GM2A	3	0	0.803548	2.55303e-31	0.112891	0.436912	0.790365	5.96266e-05	0.970349	1.31014e-29	non-dropout
GNA11	5	0	0.501728	8.15993e-05	0.688362	4.27489e-10	0.202088	0.482417	-0.654432	0.000339637	non-dropout
GNAI1	2	0	-0.895174	5.21229e-27	0.506208	3.72623e-10	-0.673465	0.000117313	-0.0501553	0.604376	non-dropout
GNAQ	5	0	0.220581	0.00026244	0.512643	5.81669e-20	-0.0896143	0.63173	0.226146	2.0297e-05	non-dropout
GNAS	17	0	-0.258577	1.54627e-06	-0.0232731	0.791833	-0.309464	0.0622037	0.180598	0.00107554	non-dropout
GNG7	7	0	0.240468	0.00591122	1.00404	4.81872e-31	0.36949	0.095685	-0.074227	0.49916	non-dropout
GNL1	6	0	0.417021	1.33973e-05	0.241305	0.00173601	-0.172736	0.34985	0.254867	0.00545442	non-dropout
GNS	5	0	0.21238	0.00936433	0.0913754	0.385639	0.0374289	0.892377	-0.564793	1.21658e-10	non-dropout
GOLGA1	2	0	0.290138	0.000631084	0.282711	0.00470318	0.300277	0.127788	-0.415712	0.000181308	non-dropout
GOT1	1	0	-0.242657	0.0005086	-0.373387	0.000380122	-0.0694145	0.753246	0.250838	0.00125374	non-dropout
GP9	2	0	-1.39063	2.86619e-05	0.2975	0.473177	-0.59187	0.400551	-4.87199	3.05346e-11	non-dropout
GPC1	7	0	-0.524339	0.000446182	-0.01344	0.966882	-0.362099	0.339666	0.17603	0.523	non-dropout
GPI	2	0	0.227937	0.000681515	0.094436	0.409973	-0.377403	0.0215575	-0.193826	0.003194	non-dropout
SLCO4A1	1	0	0.290213	0.00214782	0.26904	0.00291101	-0.238413	0.268021	0.17254	0.0234522	non-dropout
STK32C	3	0	0.69265	0.00780866	0.0640146	0.910575	0.453937	0.478058	NA	NA	non-dropout
BLOC1S2	4	0	0.433515	4.33818e-07	0.823156	1.44101e-17	0.034721	0.896555	0.362412	0.000100627	non-dropout
NEAT1	6	0	0.38675	7.815e-11	0.0971117	0.323787	0.346327	0.0306527	0.71716	2.34338e-30	NA
PGM2L1	1	0	0.263955	0.0180538	1.20413	4.41764e-43	0.472299	0.0276461	1.00781	2.26566e-34	non-dropout
CXCR3	1	0	1.1229	3.82417e-13	0.553069	0.091922	1.11641	0.000922116	-3.88284	3.20663e-56	non-dropout
RASSF3	7	0	-0.653506	7.37465e-22	-0.205846	0.00559486	-0.715909	1.9758e-06	0.100845	0.177176	non-dropout
ANKRD52	3	0	0.24034	0.000373043	0.0195731	0.852904	-0.000296558	0.998888	0.159376	0.0276097	non-dropout
ADGRD1	6	0	-0.985144	4.98761e-16	0.616657	1.95197e-05	0.0764478	0.832722	-1.36407	3.14397e-10	NA
CLEC9A	1	0	-1.11997	1.87096e-19	-0.0393953	0.789009	-0.769944	0.000172564	-0.893988	1.22253e-16	non-dropout
GAS2L3	2	0	-0.310829	0.000676485	-0.142216	0.145408	0.149615	0.551062	-0.409046	2.49557e-06	non-dropout
GATC	5	0	-0.221342	0.00140959	0.20825	0.00952496	-0.0428439	0.849928	-0.143811	0.0410898	non-dropout
INO80E	3	0	-0.209818	0.0110478	-0.147379	0.164481	-0.306116	0.134258	-0.432656	0.000557657	non-dropout
NUDT7	1	0	0.551879	0.00433419	0.259351	0.23949	1.4611	1.12371e-05	-1.18224	1.3474e-05	non-dropout
TSEN54	2	0	-0.386323	0.000102007	-0.259462	0.092305	-0.868783	5.19844e-06	-0.22032	0.0973901	non-dropout
ANGPT1	2	0	-2.17872	1.96792e-37	0.343348	0.0689492	-1.28454	0.00179101	0.0503507	0.777435	non-dropout
PIGW	6	0	-0.228478	0.00143212	-0.348894	7.77975e-06	-0.356431	0.0405368	-0.359478	4.6245e-06	non-dropout
SLC26A11	5	0	1.43856	6.83865e-06	0.762194	0.196094	NA	NA	NA	NA	non-dropout
METRNL	4	0	0.435339	6.57568e-07	0.104876	0.415921	-0.313798	0.100041	0.352507	2.05839e-05	non-dropout
ZADH2	3	0	-0.222743	0.000277493	-0.21563	0.00173802	-0.105151	0.58036	-0.453854	1.27822e-13	non-dropout
ZNF776	1	0	-0.224966	0.000445479	0.0478542	0.567607	-0.00152007	0.995333	0.386798	1.45855e-09	non-dropout
SMIM24	1	0	-0.386474	0.0343732	-0.388239	0.158794	-0.0460177	0.931847	-1.80348	1.23786e-14	NA
SLC25A42	2	0	0.33048	0.00368814	0.231269	0.0753172	-0.24572	0.344653	0.0647137	0.677502	non-dropout
HKR1	2	0	0.32086	1.58196e-06	0.154926	0.0898615	0.183116	0.341787	-0.150913	0.0818454	non-dropout
LPAR4	1	0	0.457319	0.00992448	-1.79513	4.77783e-11	0.745758	0.0426918	-0.167531	0.388366	non-dropout
NKIRAS2	4	0	-0.202254	0.00657299	-0.0287829	0.806315	-0.276808	0.12705	-0.0109867	0.900615	non-dropout
DLL1	1	0	-0.363516	9.47573e-06	1.65771	1.0709e-40	-0.0125989	0.966377	-0.150293	0.0710776	non-dropout
DUSP28	1	0	-0.271309	0.0187695	0.0851028	0.657448	-0.492663	0.0351689	0.0490193	0.717813	non-dropout
RABL3	3	0	0.182627	0.042202	-0.0425052	0.775255	0.276581	0.222334	-0.43522	3.01506e-09	non-dropout
SUMF1	8	0	0.255376	0.0329442	0.0119024	0.940556	0.372078	0.0759618	-0.433091	0.0057724	non-dropout
RPUSD3	1	0	-0.217339	0.044281	-0.183081	0.177379	-0.0885219	0.743372	-0.0527399	0.763481	non-dropout
SH3PXD2B	1	0	-0.308193	0.000379712	-0.461406	2.08904e-05	0.326106	0.0904276	0.134246	0.119743	non-dropout
KIAA0825	9	0	0.324607	0.0446902	-0.233042	0.199891	0.2617	0.447196	0.348464	0.0375921	non-dropout
RGMB	1	0	-0.846086	2.79208e-27	-0.228446	0.0319089	-0.433152	0.00759805	1.24678	4.30586e-74	non-dropout
FBXO43	1	0	-0.465732	0.00032712	-0.0732913	0.495354	0.15601	0.573933	0.189456	0.0655109	non-dropout
FAM78A	17	0	-0.841214	6.47539e-30	-0.717399	3.62639e-15	-0.457592	0.0137406	-1.38408	5.58283e-91	non-dropout
ATP11C	2	0	-0.385958	3.97329e-07	0.0400714	0.688868	-0.0424564	0.864474	0.136929	0.0769683	non-dropout
YIPF6	3	0	0.193862	0.0143971	0.0589201	0.641893	0.28904	0.184748	-0.38843	8.21649e-06	non-dropout
TRIM59	4	0	-0.602312	3.97797e-15	-0.338775	8.1791e-06	-0.186725	0.310026	0.361318	1.21198e-09	non-dropout
ANK2	4	0	-0.161922	0.0420133	-0.0801039	0.550238	0.136045	0.513495	0.0921861	0.244027	non-dropout
MKNK2	1	0	0.319694	0.00622105	-0.0587596	0.650648	-0.177319	0.371709	1.03912	6.7866e-64	non-dropout
GPX1	6	0	-0.41588	5.57481e-11	-0.0380744	0.786959	-0.479005	0.00893009	-0.122719	0.134499	non-dropout
ANK3	1	0	0.762431	0.00778117	2.05832	3.65145e-07	2.8073	2.38135e-06	NA	NA	non-dropout
GRB10	4	0	-0.681447	1.56141e-27	-0.12744	0.097846	-0.498277	0.00129213	0.106113	0.117637	non-dropout
GRID1	2	0	0.523472	0.000182668	-1.20552	8.28799e-06	1.88021	4.76307e-13	-0.134926	0.722965	non-dropout
TRIB2	1	0	0.336653	2.31768e-10	-0.164463	0.0625397	0.0542505	0.797737	-2.01872	4.09518e-163	non-dropout
DBNL	2	0	0.274927	0.000335679	0.54019	2.49103e-10	-0.0133879	0.960082	-0.124922	0.247786	non-dropout
HIPK2	5	0	0.399192	6.19598e-13	0.33905	1.08312e-05	0.291444	0.0750644	0.15971	0.0115873	NA
ABR	3	0	-0.260417	1.95726e-05	-0.421503	1.27426e-06	0.0555278	0.811896	0.232812	0.000610555	non-dropout
ANPEP	3	0	0.466971	5.35826e-11	0.941099	5.70669e-41	0.374388	0.0392337	-1.86738	1.27515e-139	non-dropout
SLC43A3	6	0	-0.201902	0.00293839	-0.228016	0.000293699	-0.476957	0.0014743	-0.555426	1.69761e-22	non-dropout
ATAD2	8	0	-0.248616	0.00269413	-0.530853	1.86668e-13	0.155107	0.466743	0.123228	0.0234256	non-dropout
C16orf72	11	0	-0.199807	0.000825471	-0.0874548	0.2835	-0.0305594	0.891347	0.573798	3.23222e-22	non-dropout
GRIN2B	1	0	1.55454	1.14727e-08	-0.67538	0.132111	3.03407	5.07244e-16	NA	NA	non-dropout
GRINA	3	0	0.573373	3.00734e-06	1.27734	2.20093e-25	0.491157	0.0379148	-0.596496	9.02495e-08	non-dropout
MRPL18	4	0	-0.303687	0.00112914	-0.166233	0.176753	-0.137357	0.5529	0.240909	0.0178474	non-dropout
PHPT1	5	0	-0.305987	0.0380167	-0.326959	0.0479975	-0.392854	0.166607	0.61233	1.1761e-05	non-dropout
BABAM1	7	0	0.312452	0.00059848	0.239723	0.0206045	-0.210341	0.321857	-0.322616	0.00254997	non-dropout
UBE2T	1	0	-0.374309	1.56277e-08	-0.196437	0.0281304	-0.355094	0.0610582	-0.264682	9.45543e-05	AF9 specific
ORMDL2	4	0	-0.228924	0.0467879	0.00454477	0.977626	-0.171912	0.467927	0.38728	9.96699e-05	non-dropout
RANGRF	1	0	-0.322693	0.0485504	0.0100938	0.960674	-0.705754	0.00445368	-0.1426	0.476099	non-dropout
COMMD9	5	0	0.273313	0.00288068	0.118856	0.296517	-0.117925	0.617404	-0.943246	1.41175e-15	non-dropout
SSU72	1	0	-0.225689	0.00612344	0.173389	0.0709396	-0.276092	0.193606	-0.39847	0.000497583	non-leukemia-specific dropout
PYCARD	2	0	-0.353612	0.00123366	0.470806	0.00104302	-0.138654	0.663923	-0.865118	5.47462e-08	non-dropout
FHOD1	4	0	-0.224013	0.0140936	0.432923	8.41553e-07	-0.386944	0.0361661	-0.191395	0.00324663	non-dropout
GRM1	5	0	1.64158	3.4938e-05	NA	NA	1.1366	0.0365384	NA	NA	non-dropout
TBK1	5	0	0.38503	8.15244e-06	-0.220852	0.035743	0.332456	0.116072	-0.761264	2.95924e-20	non-dropout
MYLIP	4	0	-0.220695	0.000508153	0.132379	0.0856677	0.300568	0.0672308	-0.0210451	0.784386	non-dropout
CLEC2D	6	0	0.287503	0.000349391	0.257627	0.00286259	0.407314	0.0247174	-0.979471	1.23806e-48	non-dropout
ANKRD11	5	0	-0.352273	1.8399e-09	0.00752206	0.940584	-0.128324	0.480705	-0.030741	0.627143	non-dropout
C11orf21	1	0	1.02907	1.97178e-12	0.349601	0.249278	1.59611	0.000224919	-2.01847	2.67658e-06	non-dropout
RACGAP1	4	0	-0.450631	1.59412e-12	-0.00976294	0.922392	0.100452	0.618734	-0.514781	1.19154e-13	non-leukemia-specific dropout
SLC25A5	5	0	0.13735	0.0427533	-0.0727417	0.496516	-0.510453	0.00294718	0.728585	5.04123e-37	non-leukemia-specific dropout
GSK3A	7	0	-0.171399	0.0442563	-0.151824	0.192676	0.0371504	0.886723	0.335855	0.000289318	non-dropout
GSR	4	0	0.286469	3.54884e-06	-0.0741396	0.491495	-0.0241806	0.918461	-0.366461	4.31726e-07	non-dropout
GSTM4	1	0	0.471417	0.00469246	0.294234	0.179019	-0.0763208	0.84895	0.0839205	0.705731	non-dropout
MSH6	3	0	-0.219256	3.29516e-05	-0.0807137	0.238846	-0.204123	0.216651	-0.294918	4.2123e-08	non-dropout
GTF2H3	3	0	0.247894	0.0156504	-0.343454	0.00208114	0.198938	0.370972	-0.157263	0.0533334	non-leukemia-specific dropout
GTF3A	4	0	-0.192405	0.00172077	-0.233718	0.0020787	-0.30925	0.0667555	-0.865204	1.33973e-48	non-leukemia-specific dropout
PARVB	5	0	0.530158	0.00593892	0.283694	0.281992	0.463859	0.260189	-0.185313	0.39117	non-dropout
ZDHHC8	3	0	0.218304	0.0220378	0.373692	0.000550411	-0.127769	0.599009	-0.0146504	0.91352	non-dropout
VPREB3	1	0	0.537816	0.00385518	0.500384	0.000752273	1.17954	6.94532e-07	-0.492228	0.155761	non-dropout
REPIN1	5	0	0.163383	0.0251429	0.226614	0.0194536	-0.160312	0.461897	-0.160697	0.0149339	non-dropout
GUCY1A3	1	0	-1.0019	1.37272e-44	0.54339	1.05868e-10	-0.10037	0.662878	-0.798438	1.42621e-15	non-dropout
GRHL1	1	0	0.96885	0.0134793	0.281982	0.487272	-0.137889	0.785017	1.77299	1.11578e-14	non-dropout
SNX8	3	0	0.211248	0.00434532	0.315594	0.0117356	-0.387938	0.0729526	0.126076	0.34319	non-dropout
SNX10	1	0	-1.00477	1.67278e-24	0.834007	9.26067e-21	-0.162141	0.535204	-0.26353	0.0209917	non-dropout
GPSM2	5	0	-0.379235	0.000231796	0.0102426	0.959136	0.203237	0.451848	0.282509	0.00937657	non-dropout
SAC3D1	1	0	-0.306504	0.00785757	-0.228283	0.203058	-0.44923	0.0521758	0.460709	0.00708488	non-dropout
EEF2K	4	0	0.267783	5.67873e-06	0.116336	0.150826	-0.0313323	0.886699	-0.193267	0.00687099	non-dropout
C18orf8	5	0	0.18736	0.00522826	0.230672	0.00292946	-0.147282	0.451357	1.0319	3.99797e-57	non-dropout
PYCR2	2	0	-0.25597	0.000677287	-0.262211	0.00360064	-0.368517	0.0599208	0.198653	0.0291929	non-dropout
NME7	7	0	0.245049	0.0346837	-0.0168881	0.941395	0.143606	0.644156	-0.0691097	0.662964	non-dropout
EPN1	4	0	-0.220894	0.00443543	0.105487	0.314244	-0.232705	0.230074	-0.0250322	0.788558	non-leukemia-specific dropout
DSE	9	0	-0.321069	6.69039e-06	-1.2285	1.99906e-48	-0.215975	0.296016	0.187282	0.0356327	non-dropout
GYPC	8	0	-0.836762	1.66874e-21	-0.0634747	0.63455	-0.275704	0.182575	-2.16094	2.17997e-56	non-dropout
TRHDE	6	0	-0.761729	7.8142e-35	0.763389	1.15499e-39	-0.744185	5.3518e-07	0.0435283	0.492359	non-dropout
CERS2	4	0	-0.164713	0.0125698	-0.0654155	0.490675	-0.319313	0.065476	-0.428722	3.59377e-11	non-leukemia-specific dropout
SLC25A24	9	0	0.217817	0.00865877	-0.122708	0.315834	0.358923	0.0958753	-0.464755	2.28097e-07	non-dropout
NRBP1	3	0	0.180546	0.0293262	0.341572	3.28345e-06	-0.0748418	0.732952	1.06376	1.7703e-45	non-dropout
CDIP1	2	0	0.234192	0.0241093	0.123709	0.428573	-0.319463	0.166525	1.42805	2.96376e-48	non-dropout
PSAT1	3	0	-0.818288	2.52697e-29	-0.940165	1.93363e-24	0.131891	0.48986	0.13347	0.0370125	non-dropout
UBQLN1	5	0	0.234297	1.93927e-05	-0.121657	0.0941626	-0.309776	0.0511047	-0.234221	1.8869e-05	non-dropout
DONSON	6	0	-0.264614	0.00170807	-0.371014	7.39001e-07	0.0231086	0.931981	0.271785	2.25704e-05	non-dropout
NRBF2	3	0	-0.302284	0.000367472	-0.152154	0.232322	-0.291279	0.132777	0.916433	1.41535e-38	non-dropout
BAZ2B	3	0	0.140129	0.0487044	0.31404	0.00270708	0.726956	4.1356e-05	0.0847602	0.311786	non-dropout
SH3KBP1	12	0	-0.203485	0.00619867	0.108384	0.224711	0.00397653	0.988396	0.217374	0.00199454	non-dropout
HIST1H1C	6	0	-0.363199	2.909e-11	-0.301982	0.00045092	-0.248355	0.197524	0.89992	1.77107e-32	non-dropout
HIST1H1D	5	0	-0.392995	1.02557e-14	-0.371715	5.86961e-05	-0.324078	0.0872557	0.715769	2.85058e-23	non-dropout
HIST1H1E	2	0	-0.159952	0.0118094	-0.366	0.000246494	-0.32338	0.0817221	0.848981	3.06081e-27	non-dropout
HIST1H1B	10	0	-0.41399	4.69452e-14	-0.329842	0.00114371	-0.422992	0.0236666	0.951381	1.05045e-33	non-dropout
ANXA1	6	0	1.78895	1.94518e-26	-1.76554	1.31111e-08	2.86007	6.77476e-10	NA	NA	non-dropout
HIST1H2AE	1	0	-0.437718	1.27291e-11	-0.417661	3.94798e-05	-0.340411	0.0584336	0.793339	1.05724e-25	non-dropout
H2AFX	5	0	-0.620878	3.91751e-24	-0.145679	0.189614	-0.65057	0.000261734	0.835325	1.3175e-39	non-dropout
H2AFZ	10	0	-0.216983	0.000303573	-0.358678	2.88128e-07	-0.3534	0.0381115	0.73449	2.94908e-39	non-leukemia-specific dropout
HIST1H2BD	3	0	-0.392177	1.72762e-11	-0.403749	0.000249851	-0.421424	0.0207893	0.931843	3.32372e-38	non-dropout
HAGH	3	0	0.300288	0.0369916	0.178755	0.330377	-0.0339262	0.924225	0.557412	0.0111118	non-dropout
HADH	3	0	-0.357214	0.00361869	-0.260024	0.00746095	-0.144916	0.52437	0.659028	4.04766e-10	non-dropout
HCK	3	0	0.540298	0.00623083	-1.04468	0.0230776	2.96816	2.53425e-09	NA	NA	non-dropout
NCKAP1L	2	0	0.472847	8.95713e-16	0.60855	8.46861e-15	0.487785	0.00209259	-0.0417616	0.604349	non-dropout
HEXA	5	0	0.23634	0.00310707	0.03918	0.738276	0.0926279	0.679573	-0.845113	1.67577e-19	non-dropout
ANXA5	2	0	0.547263	3.76977e-08	0.033918	0.796287	0.34841	0.0731527	0.857693	4.14824e-34	non-dropout
HGD	1	0	1.18949	1.72813e-05	1.19807	0.000238688	1.00603	0.0184977	0.36014	0.260865	non-dropout
ST6GALNAC6	3	0	0.30027	1.39847e-05	0.0651442	0.492403	0.196189	0.304765	-1.17244	1.05701e-46	non-dropout
CXXC1	4	0	0.267293	0.000625349	0.337586	0.000735509	-0.0775149	0.757465	-0.015999	0.877068	non-dropout
CDR2L	1	0	0.638049	0.00475194	-0.273248	0.481712	0.180919	0.727847	1.27749	2.98677e-09	non-dropout
HHEX	6	0	-0.659904	3.94936e-29	0.189196	0.0696471	-0.258689	0.172455	0.250166	0.000106067	non-dropout
HIP1	6	0	-0.24211	0.00146992	0.488584	1.82586e-07	0.510013	0.00762719	0.279352	0.000231064	non-dropout
HIVEP1	1	0	0.215503	0.00144293	0.180083	0.0186664	0.958317	2.28141e-10	-0.702705	5.86068e-16	non-dropout
HK1	9	0	0.221527	0.00217125	0.425602	2.3392e-05	-0.14525	0.499809	0.0587224	0.497363	non-dropout
HK2	6	0	0.195552	0.00153343	-0.177622	0.0326943	-0.342718	0.0592892	-0.111531	0.0472629	non-dropout
ACACA	5	0	-0.322772	1.25913e-08	-0.131046	0.0567317	-0.290008	0.0726454	0.284854	3.57709e-07	non-dropout
ANXA7	3	0	0.753771	8.39448e-24	-0.00646406	0.962203	0.0493576	0.840878	0.304269	0.000139414	non-dropout
HLA-A	1	0	-0.194723	0.00495728	0.0507274	0.69071	-0.119826	0.594383	1.0251	3.28609e-44	non-dropout
HLA-B	1	0	-0.308627	1.53857e-06	-0.0765918	0.451575	-0.09347	0.679234	0.62271	1.25261e-24	non-dropout
HLA-DMA	1	0	0.454886	8.60834e-07	-0.580393	5.73904e-06	1.03356	1.29355e-08	-0.340472	0.0288984	non-dropout
HLA-E	3	0	-0.20046	0.0134612	0.335837	1.8057e-06	-0.246473	0.143314	0.737638	1.70843e-33	non-dropout
MR1	4	0	0.277141	0.000535553	0.302286	0.00239466	0.397348	0.0515185	-0.947906	4.54795e-24	non-dropout
HLX	15	0	-0.616786	2.42743e-18	-0.335923	0.0035091	0.16924	0.403186	0.218595	0.0450687	non-dropout
HMGN2	19	0	-0.378513	4.23516e-11	-0.120285	0.0938043	-0.16794	0.368311	0.319493	4.11069e-09	non-dropout
HMGCS1	7	0	-0.319008	3.25044e-06	-0.562546	2.12296e-12	0.204018	0.299765	0.610093	1.74158e-24	non-leukemia-specific dropout
HMMR	2	0	-0.196926	0.0482142	-0.451859	3.24531e-05	0.251775	0.217548	0.476158	2.81329e-08	non-dropout
HMOX1	14	0	-1.1922	0.000344481	NA	NA	NA	NA	NA	NA	non-dropout
NR4A1	20	0	1.15288	2.937e-08	1.09786	7.20098e-08	0.654835	0.0124154	0.169762	0.112401	non-dropout
CCDC85C	2	0	0.363036	0.0138249	0.487905	0.00109679	-0.164437	0.670085	0.054351	0.817245	non-dropout
HIST2H2AB	1	0	-0.614172	1.39838e-16	-0.411325	0.00127316	-0.497019	0.0118795	1.06849	4.2575e-33	non-dropout
HNRNPF	15	0	-0.170192	0.00220991	-0.173353	0.0229134	-0.518849	0.000480077	0.050714	0.391236	non-dropout
HOXA1	2	0	-0.707792	0.0210998	0.846337	0.00714746	0.106293	0.864918	-1.03505	0.00355078	non-dropout
HOXA2	1	0	-0.655042	0.00028099	0.917803	1.96357e-08	-0.115393	0.786767	0.38069	0.0409928	non-dropout
APBA1	2	0	-0.296092	1.00387e-06	1.12277	3.16588e-51	0.695426	5.13714e-06	0.388817	1.64611e-07	non-dropout
HOXA3	1	0	-0.96512	1.11223e-31	0.784401	4.51099e-21	-0.625479	0.000577985	0.895988	5.49395e-26	non-dropout
HOXA4	1	0	-1.13447	2.36742e-25	0.424047	3.33228e-05	-0.339096	0.181019	0.95104	1.26188e-17	non-dropout
HOXA5	1	0	-1.2359	4.61394e-64	0.037648	0.718285	-0.722867	4.28898e-05	0.216347	0.0089472	non-dropout
HOXA6	1	0	-1.29254	5.85097e-49	0.209089	0.0321342	-0.944125	2.64174e-07	0.341932	0.000526092	non-dropout
HOXA7	1	0	-1.73091	1.84223e-101	-0.0508153	0.693102	-1.4278	5.96892e-16	-0.334093	1.15296e-05	non-dropout
HOXA10	9	0	-1.51699	5.30007e-98	0.00458082	0.97303	-1.07359	2.65579e-12	0.0483004	0.545015	AF4 specific
HOXC4	1	0	-0.46173	0.000108662	-0.364913	0.00838461	-0.00633728	0.986291	-1.21096	4.02775e-11	non-dropout
APBB2	2	0	0.262737	0.00033418	0.7688	3.59878e-39	0.331978	0.0407321	0.369479	1.03357e-07	non-dropout
HPCAL1	13	0	0.213339	0.00411627	-0.175541	0.202943	0.171745	0.462796	0.337842	0.000582451	non-dropout
RAB37	2	0	0.784763	3.2877e-08	0.963025	5.45062e-07	1.61739	2.61202e-06	-1.05278	0.000992223	non-dropout
MMAB	2	0	-0.337312	9.91211e-05	-0.324844	0.000268602	-0.14981	0.483495	0.0780042	0.399322	non-dropout
AGFG1	9	0	0.17712	0.00797747	-0.101361	0.359883	0.239661	0.206608	0.153581	0.0193251	non-dropout
HSD17B4	2	0	0.366031	1.41341e-05	-0.00389815	0.979425	0.174763	0.416359	0.010498	0.927002	non-dropout
BIRC3	1	0	1.36121	1.27913e-08	0.432448	0.198915	1.02712	0.0521635	-2.04345	6.32085e-07	non-dropout
DNAJB2	3	0	0.570181	2.09653e-07	0.75385	1.29848e-14	-0.165451	0.533297	-0.0670552	0.63874	non-dropout
DNAJA1	8	0	-0.192122	0.00269597	-0.167593	0.128871	-0.422778	0.00672526	0.788089	1.13065e-42	non-dropout
HSPA1B	2	0	-0.244267	0.00768356	-0.471441	0.00229221	-0.646145	0.000961096	1.87271	3.67059e-127	NA
HSPA4	8	0	0.214448	0.000450706	-0.108639	0.217664	-0.0494569	0.813755	0.017127	0.796743	non-dropout
HSPA8	5	0	-0.226959	0.000123122	0.0475872	0.688229	-0.506553	0.00209898	0.43819	1.41975e-16	AF9 specific
BIRC5	1	0	-0.478525	7.4292e-11	-0.126688	0.225472	-0.313949	0.0766095	-0.341927	0.000191325	non-leukemia-specific dropout
HSP90AA1	13	0	-0.123867	0.0289784	-0.182646	0.0148146	-0.157536	0.357496	0.455646	1.04471e-18	non-dropout
IGSF3	4	0	-0.383457	1.26708e-07	-0.361628	0.000324843	-0.326895	0.0910268	-0.632626	1.85285e-10	non-dropout
HSPD1	14	0	-0.230637	6.47319e-05	-0.186971	0.0107007	-0.379698	0.0177162	0.498694	3.12781e-19	non-leukemia-specific dropout
DNAJB1	7	0	-0.383587	1.16978e-09	0.0299134	0.828964	-0.514941	0.0016069	1.33272	3.55361e-122	non-dropout
HSPG2	1	0	-1.11379	1.13257e-39	-0.473437	0.000608907	-0.952983	1.09459e-06	-0.00391451	0.971333	non-dropout
SNAI3	4	0	0.692316	4.00963e-08	-0.938748	0.000551123	1.3185	7.27296e-06	-0.847289	1.30395e-07	non-dropout
APLP2	14	0	0.196135	0.00622968	0.114869	0.132261	-0.03186	0.890825	1.46339	2.49472e-107	non-dropout
NDST1	1	0	0.279165	0.00056374	0.00160664	0.989513	0.288413	0.110087	-1.20645	1.14624e-52	non-dropout
FOXN2	9	0	-0.192965	0.0197697	-0.62614	1.64899e-22	0.385645	0.0217437	-0.363096	9.97322e-09	non-dropout
HTR1F	1	0	-0.189083	0.0248588	0.575872	1.19757e-12	-0.135257	0.597644	0.904947	9.0866e-22	non-dropout
HTR7	2	0	1.20727	8.725e-12	1.68847	5.7357e-17	1.36897	1.62473e-05	NA	NA	non-dropout
IARS	5	0	-0.358586	6.26781e-10	-0.36832	1.16381e-07	-0.041321	0.842648	-0.544662	6.2412e-23	non-leukemia-specific dropout
UBAC2	4	0	0.236625	0.00264774	0.165322	0.104872	-0.126147	0.57723	0.157605	0.128626	non-dropout
ANKRD13D	5	0	-0.415498	3.30331e-08	0.002154	0.98599	-0.168534	0.371617	-1.0271	3.42523e-38	non-dropout
OXLD1	1	0	-0.411863	3.43927e-06	0.0400422	0.814952	-0.697818	0.000885025	-0.105433	0.508197	non-dropout
MSL1	3	0	-0.147891	0.0302968	-0.191477	0.0231285	-0.195226	0.289852	-1.1499	7.96992e-60	non-dropout
MYPOP	1	0	-0.340167	0.0405884	0.0716178	0.823314	-0.312475	0.384618	0.0711049	0.789896	non-dropout
C1orf228	1	0	-0.391769	0.00456151	-0.917229	6.88151e-05	0.219226	0.570563	-1.60751	2.2513e-12	non-dropout
SLC35E4	1	0	0.649281	0.0117499	0.246488	0.644964	0.41281	0.482994	1.17405	3.60869e-05	non-dropout
ID1	6	0	-0.527879	1.63304e-08	-0.771749	1.17781e-13	-0.660592	0.000180729	-0.512554	1.08837e-12	non-dropout
SPOPL	7	0	0.191393	0.0457105	-0.303906	0.00266316	0.44029	0.0275172	-0.716579	4.03047e-19	non-dropout
ID2	5	0	-0.225525	0.0044792	-0.300387	0.00148848	0.582345	0.011537	-0.232475	0.00120964	non-dropout
ID3	4	0	-0.231948	0.000451994	0.12	0.241472	-0.742428	9.49998e-06	-0.096966	0.146185	non-dropout
NAT8L	1	0	0.415383	0.000231513	0.468921	4.03843e-05	-0.250629	0.295342	0.193874	0.153194	non-dropout
ZC3H12D	12	0	-0.21238	0.00545053	0.344284	2.09907e-05	-0.0620765	0.779029	-2.40861	8.2506e-121	NA
TREML1	3	0	0.655411	0.0463811	NA	NA	NA	NA	NA	NA	non-dropout
ACER2	1	0	0.666072	1.88039e-07	0.302892	0.0505818	0.546144	0.0334735	1.7596	1.66956e-45	non-dropout
HMX3	15	0	-1.34749	1.17638e-72	0.0629827	0.592973	-0.518071	0.00652993	-0.378614	1.94648e-06	non-dropout
IDE	4	0	0.438646	5.55628e-11	0.291495	0.000281556	0.163509	0.400683	-0.20558	0.0143797	non-dropout
IDH3G	2	0	0.295083	0.00158331	0.264235	0.013337	-0.261221	0.277108	-0.0339472	0.779941	non-dropout
IDS	3	0	0.507965	1.17366e-15	0.0247113	0.837703	0.608172	0.000533274	0.559201	1.72685e-17	non-dropout
ZKSCAN2	1	0	-0.218418	0.00114489	0.173848	0.0460981	-0.0630823	0.75438	0.563431	6.19819e-20	non-dropout
ZSCAN22	2	0	0.468463	7.23667e-06	0.297629	0.0132097	0.335975	0.120619	-0.0979992	0.472205	non-dropout
SP110	2	0	0.188357	0.0247364	0.167267	0.122975	0.113113	0.622331	-1.12316	9.82177e-28	non-dropout
IFIT3	3	0	0.703725	1.19145e-09	0.274548	0.0689327	-0.105975	0.753765	-1.4981	3.91648e-28	non-dropout
NCKAP5	1	0	0.907487	1.9921e-21	4.69754	0	2.26584	3.1809e-21	-0.160072	0.408604	non-dropout
PRORSD1P	1	0	-0.624558	1.33374e-05	0.113629	0.562799	-0.276949	0.39918	-0.385883	0.0282645	NA
LRIT3	1	0	0.62365	0.0230221	0.0548663	0.902705	0.369482	0.502828	NA	NA	non-dropout
MACC1	1	0	1.5874	1.22631e-21	-0.84674	0.00188266	2.07029	5.42234e-16	-0.562072	0.0189386	non-dropout
SOWAHD	7	0	-0.280464	0.00823598	-0.594735	1.05892e-07	-0.0701194	0.792442	-1.31364	6.58261e-11	non-dropout
SERINC2	3	0	0.782068	3.12961e-07	0.233101	0.136407	0.307076	0.138031	-2.35064	1.77522e-48	non-dropout
IGF1R	6	0	-0.201388	0.00102507	0.0487468	0.526951	-0.656145	2.05664e-06	0.153206	0.00552161	non-dropout
ANKDD1A	6	0	0.414098	0.000722026	0.30674	0.171603	0.489247	0.171554	-0.502497	0.00896696	non-dropout
IGF2R	4	0	0.15825	0.00503899	0.0703874	0.321606	-0.0158757	0.943639	0.0847691	0.152983	non-dropout
ZNF530	1	0	-0.171851	0.0354774	-0.267385	0.000569511	-0.0912565	0.674222	0.335674	6.6498e-05	non-dropout
IGFBP2	4	0	-0.80235	9.4868e-22	-0.59601	4.26474e-05	-0.180984	0.43329	-0.710329	1.73733e-08	non-dropout
IGFBP7	9	0	0.738314	1.27124e-21	-0.497245	4.22095e-06	0.326658	0.132556	-0.125209	0.348248	non-dropout
RTN4RL2	5	0	-0.987312	0.000305205	-0.290224	0.512636	NA	NA	0.222391	0.600233	non-dropout
GATS	3	0	0.62637	4.42558e-08	0.866289	2.59168e-23	0.241876	0.315308	0.360289	0.00296314	non-dropout
APRT	3	0	-0.214051	0.0182147	0.0285647	0.835003	-0.601516	0.00974406	-0.352238	0.00212848	non-dropout
IGLL1	2	0	0.375749	0.00132761	0.19812	0.0417395	-0.133814	0.634876	-1.93251	1.33983e-38	non-dropout
FAS	1	0	1.79309	3.82164e-12	-0.121213	0.697048	0.95774	0.0133245	-2.63904	8.63137e-15	non-dropout
IL1R1	1	0	0.728153	0.00127334	-0.0200841	0.938883	-0.303307	0.585024	-3.21315	4.87343e-27	non-dropout
IL1RN	8	0	-0.796355	0.000325844	-1.36478	0.000646209	0.503225	0.252373	-3.8613	5.18311e-23	non-dropout
IL6ST	4	0	0.427402	2.99836e-06	0.404568	4.05388e-08	0.108202	0.641255	0.979397	1.78757e-39	non-dropout
CXCL8	4	0	0.768275	0.00955636	-0.25062	0.586016	1.76342	0.00199908	NA	NA	NA
IL9R	2	0	0.602833	1.15611e-12	0.57503	6.2099e-07	1.20642	1.56252e-13	-2.39621	1.87002e-53	non-dropout
IL10RA	1	0	2.11133	4.14447e-22	-0.103183	0.856059	3.14505	5.49383e-16	1.82849	1.57871e-09	non-dropout
IL12RB1	6	0	1.17119	1.18978e-29	-0.264032	0.176984	0.60226	0.00645577	-1.43983	2.82992e-14	non-dropout
IL13RA1	2	0	0.998286	3.07384e-06	NA	NA	NA	NA	-0.0153708	0.949898	non-dropout
IRF2BP2	6	0	-0.156154	0.00739069	-0.319068	0.0011633	0.125408	0.508466	-0.743674	1.64109e-41	non-dropout
FOXK2	1	0	-0.198915	0.00246667	0.103399	0.303597	-0.242057	0.158693	-0.176835	0.00858397	non-dropout
ILK	3	0	-0.272274	0.00669158	0.0357515	0.799557	0.365474	0.096191	-0.0237404	0.817958	non-dropout
INCENP	5	0	-0.373536	3.65173e-09	-0.138592	0.129964	-0.1341	0.513535	-0.413863	1.15444e-09	non-leukemia-specific dropout
INPP4A	2	0	0.151173	0.0451758	-0.178054	0.0403972	0.137647	0.472253	0.281985	0.000330284	non-dropout
INPP5A	3	0	0.228397	0.00124202	0.48147	9.83972e-09	0.237489	0.189762	0.200978	0.00698308	non-dropout
INPP5B	4	0	-0.146502	0.038501	-0.252505	0.00312722	0.149535	0.450757	-0.063304	0.417516	non-dropout
INSIG1	3	0	-0.366225	1.21256e-06	-0.571868	3.19752e-14	-0.145951	0.41695	0.611255	1.20887e-23	non-dropout
IPP	1	0	0.927713	6.69226e-09	0.130165	0.509395	0.580283	0.0321089	-0.364613	0.043615	non-dropout
ITGA6	3	0	-1.08126	8.31452e-50	0.140621	0.144668	-0.674207	0.00269183	-1.96335	2.77434e-118	non-dropout
IRAK2	3	0	-0.216169	0.00171805	-0.869967	9.70271e-17	0.0392731	0.883526	-0.758935	1.7666e-15	non-dropout
IREB2	6	0	0.163322	0.0198847	-0.191782	0.00607731	0.260355	0.140798	-0.0462799	0.459928	AF4 & AF9
IRF7	3	0	0.337977	0.00312346	0.0113516	0.953175	-0.166106	0.607599	2.65426	2.00748e-147	non-dropout
IRS1	2	0	-0.698604	2.9848e-34	0.0769506	0.479893	-0.252197	0.183058	-1.17141	1.01789e-26	non-dropout
ITGA2	5	0	-1.02663	9.19409e-24	-0.510717	8.2004e-08	-0.742068	1.58663e-05	-0.738567	1.80912e-18	non-dropout
ITGA2B	1	0	-0.95345	0.00342797	NA	NA	0.289766	0.692603	NA	NA	non-dropout
ITGA9	2	0	-0.76355	1.07175e-10	0.394215	0.00384748	2.72027	3.05001e-34	0.0649236	0.71642	non-dropout
ITGAL	11	0	0.162073	0.0217161	-0.699584	6.07968e-21	1.02574	1.36157e-10	-1.02975	6.46033e-38	non-dropout
ITGAX	3	0	-0.709247	7.75844e-05	0.463455	0.227918	1.65952	4.2843e-05	-0.746652	0.00154505	non-dropout
ITGB2	3	0	-0.16534	0.0497892	0.198908	0.0800343	-0.0846661	0.731277	-1.57276	9.09199e-58	non-dropout
ARAF	5	0	0.198154	0.0139777	0.0257661	0.841651	-0.0231506	0.92853	-0.148979	0.0876424	non-dropout
ITGB5	3	0	-0.40349	2.42703e-09	-0.31992	0.000189851	-0.0328903	0.893873	-0.953335	4.96049e-39	non-dropout
ITGB7	6	0	0.67901	4.09522e-18	-1.36029	5.314e-52	0.480223	0.00507919	-0.751088	1.1694e-22	non-dropout
ITGB8	2	0	-1.86444	1.37774e-98	-0.0915244	0.459275	-0.0294654	0.909857	0.101789	0.19531	non-dropout
ACADVL	4	0	0.659817	1.5696e-13	0.0339412	0.808451	-0.223906	0.369251	1.38595	1.36715e-78	non-dropout
ITPK1	6	0	-0.184812	0.00593069	-0.0120949	0.924257	-0.425888	0.0150215	0.0458917	0.616284	non-dropout
ITPKB	2	0	-0.165259	0.0474657	0.860734	2.20829e-25	0.353613	0.0720422	-0.628471	2.84451e-10	non-dropout
ITPR1	11	0	-0.309611	1.89645e-06	1.6992	2.84223e-134	-0.0435534	0.842648	0.307512	4.56271e-06	non-dropout
JAK2	4	0	0.316809	0.000499854	0.410659	1.12215e-05	0.960866	1.23842e-08	0.777526	2.43781e-17	non-dropout
JUNB	6	0	0.275092	0.00923541	-0.0242768	0.89216	-0.606773	0.00129593	1.08397	1.08883e-49	non-dropout
CD82	7	0	0.642436	2.82479e-08	0.0999128	0.741258	1.85911	1.17617e-08	-1.08843	0.00156878	non-dropout
KCNA3	6	0	0.990316	0.000960504	2.29051	3.45661e-16	2.25312	2.2712e-07	NA	NA	non-dropout
NCR3LG1	1	0	0.366418	1.87647e-08	0.193202	0.0350416	0.611206	0.000462742	-1.21862	1.25917e-62	non-dropout
TBC1D10C	5	0	0.407525	1.61783e-05	0.690732	1.5067e-14	0.134265	0.672305	-1.92118	1.20435e-40	non-dropout
LRRC37A3	2	0	-0.580485	0.0141243	0.247594	0.47125	0.153952	0.755079	0.193493	0.476448	non-dropout
B3GNT8	3	0	-1.05647	0.000817984	-0.674081	0.168557	NA	NA	-1.52489	0.000316431	non-dropout
C19orf68	4	0	-0.330759	0.00469713	-0.00852514	0.96875	-0.191542	0.477715	-0.0998388	0.548748	NA
ZNF773	1	0	-0.246472	0.00453692	0.168314	0.11729	0.0143766	0.959414	1.40542	2.04572e-61	non-dropout
SFT2D2	3	0	0.175266	0.0268937	0.0414475	0.740628	0.311288	0.129949	-0.0356461	0.686627	non-dropout
RBM43	1	0	0.338653	0.00407094	0.086049	0.504445	0.495131	0.0321738	-0.574458	1.60725e-06	non-dropout
C5orf34	3	0	-0.255522	0.00534894	-0.167019	0.097052	0.176514	0.431565	0.115049	0.34461	non-dropout
MAST4	4	0	-0.394514	4.20322e-08	0.952399	2.15304e-38	0.160502	0.445268	-0.155869	0.0744303	non-dropout
SIMC1	1	0	-0.182607	0.00804248	0.149062	0.0779634	0.120646	0.541265	-0.0335477	0.69892	non-dropout
KCNG1	2	0	-0.521011	1.19795e-07	-0.548556	0.000504144	-0.407624	0.0864988	0.0898141	0.648854	non-dropout
AGRN	3	0	1.04568	6.28879e-37	0.513512	0.000119282	0.136049	0.596996	0.153854	0.393303	non-dropout
KCNMA1	1	0	0.173983	0.0236277	0.426402	5.43537e-05	0.709173	5.73089e-06	0.121129	0.141309	non-dropout
KCNN3	1	0	0.812593	0.00275626	NA	NA	2.32931	0.000486029	NA	NA	non-dropout
LINC-PINT	6	0	0.210668	0.0163263	-0.735473	3.38063e-07	0.585612	0.00186121	-0.3849	0.000210426	NA
MALAT1	23	0	0.297329	2.38973e-05	-0.0580419	0.547574	0.246085	0.142213	0.179797	0.010119	NA
KDR	3	0	1.14903	4.79237e-11	0.407077	0.317963	NA	NA	NA	NA	non-dropout
KHK	2	0	-0.478782	0.0026035	-0.0929622	0.67473	-0.703211	0.0115687	0.756827	0.000424392	non-dropout
KIF3C	3	0	-0.357752	0.000566748	-0.0692352	0.597388	-0.68502	0.000319607	0.477761	1.81928e-05	non-dropout
KIF5B	5	0	-0.136964	0.0375658	-0.0332354	0.721201	-0.0628004	0.764946	0.225311	2.09068e-05	non-dropout
KIFC3	6	0	0.186981	0.0388363	0.684605	9.43161e-08	0.229288	0.320991	-1.15398	1.67577e-19	non-dropout
ARF6	17	0	-0.116882	0.0485915	-0.149554	0.10825	-0.207728	0.221422	0.0103087	0.876703	non-dropout
KLRC2	1	0	-0.866497	0.00144293	-0.059005	0.903405	-0.527993	0.303276	0.00376302	0.992164	non-dropout
KLC1	2	0	0.222553	0.000330466	-0.0851822	0.286802	0.286848	0.0830353	0.241659	0.000134113	non-dropout
KIF11	4	0	-0.437183	2.31476e-08	-0.343094	5.41166e-06	0.1233	0.586541	0.0694457	0.28451	non-leukemia-specific dropout
KIFC1	5	0	-0.318855	1.48231e-06	-0.0305518	0.750865	-0.187858	0.328317	-0.130456	0.045846	non-dropout
KPNA2	3	0	-0.253947	1.52113e-05	-0.321861	6.47397e-05	-0.283187	0.0900774	0.651379	5.92249e-30	non-dropout
KRT10	1	0	-0.276438	0.0327323	-0.0334565	0.865266	-0.546484	0.0150215	-0.321586	0.0117602	non-dropout
CEP85L	9	0	-0.180949	0.0148371	0.146375	0.137252	0.481185	0.0108755	0.484115	4.81225e-11	non-dropout
C6orf120	4	0	-0.249744	0.000339741	-0.115771	0.290736	-0.340761	0.0500892	0.220836	0.00207655	non-dropout
LIPT2	1	0	-0.595809	0.000112744	0.430984	0.0133802	-0.28234	0.400683	1.17966	7.621e-09	non-leukemia-specific dropout
CCDC184	1	0	0.743084	0.00562351	NA	NA	NA	NA	NA	NA	NA
C12orf75	3	0	0.41129	0.000465855	-1.32565	6.32217e-31	0.693307	0.000118814	-0.987612	1.15156e-15	non-dropout
SHISA2	1	0	0.835094	1.22178e-05	-0.949195	0.0040081	1.88809	1.19238e-06	2.85123	3.94308e-39	non-dropout
RHOB	2	0	-0.835605	1.63946e-10	-0.188235	0.136512	-0.74302	0.000117313	1.21707	3.06047e-60	non-dropout
C15orf52	3	0	-0.317279	0.044217	0.35267	0.165904	0.279466	0.525374	-1.51695	5.55202e-07	non-dropout
UBE2Q2P1	1	0	0.862664	1.17066e-09	0.874923	1.90107e-11	0.908146	0.000885025	-0.602673	0.00266998	NA
SCIMP	1	0	0.509401	3.01185e-10	1.33248	6.07325e-41	0.2681	0.293824	-0.624511	4.38464e-06	non-dropout
YPEL2	2	0	0.65155	1.1713e-10	0.767778	3.60431e-18	0.390324	0.0780631	0.0188821	0.928686	non-dropout
ZNF749	1	0	-0.226458	0.0102799	-0.0156664	0.921316	0.0945569	0.704511	-0.191153	0.088653	non-dropout
LYSMD1	1	0	-0.257105	0.0207516	0.133426	0.362402	0.0540933	0.867118	-0.854214	5.23389e-05	non-dropout
COA6	2	0	-0.329825	0.00773828	-0.338247	0.028833	-0.197522	0.489041	-1.00167	1.15641e-11	non-leukemia-specific dropout
FAM212A	3	0	-0.898044	1.88542e-24	0.344653	0.000686214	-0.724901	0.000106529	-1.00453	1.47217e-23	non-dropout
BEND4	14	0	-0.495848	4.69609e-15	-0.198502	0.00189553	-0.31651	0.0694357	0.106113	0.104316	non-dropout
ANXA2R	3	0	-2.12353	3.08691e-222	-0.0609838	0.497326	-1.27339	2.2047e-19	0.176855	0.007939	non-dropout
LAMTOR4	5	0	-0.240311	0.0309507	0.137643	0.373179	0.000147609	0.999499	0.019405	0.916364	non-dropout
XKR9	1	0	0.470169	0.0347286	0.409747	0.111896	0.275771	0.533297	-0.394397	0.140102	non-dropout
AFF3	13	0	1.06492	2.72365e-71	-0.188288	0.0488648	1.79977	9.61413e-40	0.0731641	0.417043	non-dropout
ACAT2	5	0	-0.205611	0.0294443	-0.537829	3.72481e-09	-0.0311448	0.901265	0.55382	5.86538e-13	non-dropout
LAIR1	2	0	-0.79198	2.08648e-14	-0.331692	0.00125144	1.28877	2.0365e-13	-2.16337	8.78493e-90	non-dropout
LAMA3	3	0	-0.372239	0.000281145	0.716923	6.09882e-15	0.262263	0.220865	-0.133935	0.276184	non-dropout
PINLYP	2	0	-0.579117	0.00268321	0.514593	0.0383009	0.562303	0.200845	-1.84452	5.56508e-11	non-dropout
LAMC1	2	0	-0.2221	0.000657496	-0.252977	0.000493388	-0.103193	0.597855	-0.0515619	0.525196	non-dropout
LAMP1	5	0	0.374095	3.00523e-05	0.0687493	0.546756	-0.201633	0.314574	-0.146719	0.080611	non-dropout
LAMP2	5	0	0.376394	6.16786e-08	-0.160858	0.151241	0.321648	0.139114	0.20722	0.00518109	non-dropout
LASP1	9	0	0.200332	0.000924218	0.146953	0.103417	-0.132604	0.474356	1.31942	1.8785e-87	non-dropout
LCK	3	0	0.474304	1.01423e-10	-0.0863374	0.425863	-0.351425	0.0598842	-1.47929	2.17272e-30	non-dropout
LCP1	8	0	0.240002	0.00205767	-0.153367	0.0329155	-0.0894846	0.641896	-0.0428765	0.470762	non-dropout
LCP2	7	0	0.273014	0.000468679	0.692945	9.16547e-20	0.158522	0.406815	-2.19505	4.39377e-186	non-dropout
LDHA	7	0	-0.175231	0.00293839	-0.0623945	0.487035	-0.527875	0.000805211	0.461557	4.89407e-15	non-dropout
LDLR	3	0	-0.478508	1.41772e-10	-0.240513	0.0116334	-0.269556	0.0876887	0.149374	0.0191164	non-dropout
LFNG	5	0	1.41681	1.0002e-10	1.13208	8.80444e-15	1.46153	4.13535e-06	2.49378	9.26126e-41	non-dropout
LGALS3BP	11	0	-0.202294	0.00513359	0.0987556	0.369604	-0.728654	7.1455e-05	-0.192888	0.0282752	non-dropout
ARHGDIA	4	0	-0.202176	0.0265635	-0.0251526	0.844459	-0.571535	0.00139635	-0.313411	2.32895e-06	non-dropout
LGALS8	1	0	0.798898	5.21681e-08	-0.409404	0.368901	0.632326	0.140514	-1.31509	0.000757418	non-dropout
LGALS9	5	0	0.377427	0.000311143	0.40987	0.000479667	0.159191	0.534145	-0.842672	2.21211e-06	non-dropout
ARHGDIB	2	0	-0.167256	0.0408214	0.323457	3.02105e-06	-0.385989	0.0217956	-0.597298	4.72541e-20	non-dropout
LIG4	1	0	0.218457	0.0422091	0.119649	0.376083	-0.261448	0.248582	-1.03296	2.15799e-43	non-dropout
ABLIM1	3	0	1.05914	7.14061e-43	1.81213	4.94149e-93	1.3149	7.3152e-15	-0.72059	9.93974e-12	non-dropout
LIMK1	8	0	0.249102	0.000880454	0.366962	1.75757e-05	0.121941	0.586272	-0.785736	2.2711e-13	non-dropout
LIMK2	3	0	-0.199194	0.00721769	-0.370276	2.65974e-06	-0.106246	0.623388	-0.140688	0.131287	non-dropout
FADS1	1	0	-0.483026	2.44887e-14	-0.653205	7.35515e-21	-0.203641	0.300731	-0.471442	2.636e-11	non-dropout
FADS3	3	0	0.933326	4.55387e-14	1.07702	2.91691e-11	0.604567	0.0314768	0.551433	0.0252679	non-dropout
SLC25A35	2	0	0.475956	0.0261083	0.216396	0.396734	-0.256102	0.493921	0.337802	0.192138	non-dropout
MEX3D	4	0	-0.203402	0.0315229	-0.392633	0.000187954	-0.484868	0.0206357	0.413879	0.00015048	non-dropout
LMNB1	11	0	-0.144551	0.0171537	-0.369894	1.23068e-09	0.0409212	0.853458	-0.763076	6.74558e-38	non-dropout
PRSS57	1	0	0.588896	0.00586915	-1.49621	3.8253e-18	0.115319	0.749944	-2.78084	1.505e-40	non-dropout
LINC00114	1	0	0.76709	7.04716e-08	0.417526	0.0181284	0.935657	0.000820388	-3.37346	9.02666e-15	NA
TEX41	1	0	-1.23435	2.40986e-09	-0.412877	0.0562539	0.73081	0.0769333	-0.509655	0.0146768	NA
MBNL1-AS1	1	0	-0.844221	1.08107e-16	0.151634	0.29443	-0.536283	0.008027	0.27628	0.00504711	NA
CCSER1	1	0	0.428291	0.000242741	1.25339	1.21687e-27	0.394265	0.0990752	-0.0479791	0.74535	non-dropout
LNPEP	3	0	0.155595	0.0220502	-0.0668739	0.478504	0.147957	0.467927	-0.399072	3.06789e-09	non-dropout
VLDLR-AS1	1	0	-0.771256	0.000793026	-0.474142	0.155196	1.47587	4.71641e-05	-0.256116	0.467594	NA
TOMM5	3	0	-0.197424	0.0119952	-0.29349	0.00151264	-0.507212	0.00318604	-0.0524768	0.535142	non-dropout
SNX30	1	0	-0.380413	4.28399e-05	-0.162567	0.0291319	-0.67905	2.64668e-06	0.020027	0.792534	non-dropout
SLC25A53	3	0	0.409633	0.000310733	-0.0274925	0.866693	0.0544474	0.846732	-0.406952	0.000177473	non-dropout
LPP	1	0	0.152229	0.0177081	0.181927	0.0431395	0.181434	0.35558	0.237296	0.000126415	non-dropout
LRMP	10	0	-0.340376	1.87736e-05	0.409687	3.98223e-08	-0.0238154	0.919059	-1.05713	1.49387e-59	non-dropout
ZBTB34	1	0	-0.331386	1.57651e-06	-0.0247811	0.804261	-0.0868403	0.670189	0.308632	4.91564e-05	non-dropout
LRCH4	5	0	0.219518	0.035965	0.32133	0.000312307	-0.18623	0.393546	1.73641	1.59356e-135	non-dropout
CTXN1	5	0	0.562477	0.0259215	-0.322298	0.268853	-1.00374	0.00974368	-0.762071	0.02281	non-dropout
C16orf74	1	0	0.399414	8.7648e-06	0.00569492	0.975287	0.816614	6.41484e-06	-0.607416	0.000993766	non-dropout
LTBP2	2	0	0.551055	0.0220188	0.967463	3.33742e-07	0.428239	0.280461	-0.38396	0.338947	non-dropout
LTBP3	2	0	0.67253	1.26677e-05	0.21889	0.232801	0.0658832	0.87196	0.0410549	0.823127	non-dropout
LY9	1	0	-0.459622	0.00190109	0.528978	0.000304297	-0.199911	0.508466	-2.69374	2.7932e-27	non-dropout
LYL1	3	0	-0.752538	7.01351e-14	0.586378	3.009e-09	-0.525222	0.00880567	-1.28374	2.89379e-65	non-dropout
MIR146A	3	0	-0.556265	0.0491579	0.375	0.0913244	-0.334632	0.479209	NA	NA	NA
NBR1	4	0	0.337619	7.22017e-06	0.215018	0.0106499	0.293066	0.130104	-0.143401	0.21422	non-dropout
MIR17HG	1	0	-0.252683	0.00289231	-0.403908	1.32269e-07	0.0310885	0.892428	0.193898	0.00563343	NA
MARCKS	21	0	0.298247	1.01869e-05	-0.209142	0.0111035	0.187865	0.325451	-0.610132	2.19192e-23	non-dropout
MXD1	3	0	0.271833	0.00333684	-0.238686	0.00625251	-0.110413	0.597143	1.16538	6.19185e-73	non-dropout
MAD2L1	2	0	-0.284931	0.00387439	-0.433737	5.58123e-07	-0.206816	0.297741	0.253888	0.000472139	non-leukemia-specific dropout
SMAD3	11	0	-0.488826	4.05731e-05	2.19098	5.62687e-146	1.80058	2.23385e-21	-0.277643	0.0235663	non-dropout
ARRB2	8	0	-0.260195	0.00147627	-0.234778	0.00295637	-0.412577	0.0142898	-0.976854	1.04004e-40	non-dropout
SMAD6	27	0	-1.03895	2.20459e-14	0.310418	0.213984	1.00485	0.000329298	0.0840251	0.693375	non-dropout
SMAD7	5	0	-0.224477	0.0284292	-0.411	0.000374084	0.273598	0.153686	-0.486723	6.06991e-13	non-dropout
MAF	9	0	1.10359	2.62754e-05	NA	NA	NA	NA	NA	NA	non-dropout
ASIC1	5	0	-0.598154	0.0435771	0.153549	0.727374	-0.365383	0.550554	NA	NA	non-dropout
STS	1	0	0.83236	6.05301e-38	0.699154	1.02968e-19	0.633693	0.000178908	0.258733	0.00412789	non-dropout
MAN1A1	6	0	-0.399055	0.0051907	0.669055	1.75886e-09	0.62608	0.00191428	0.684126	1.43659e-12	non-dropout
MAN2A1	6	0	-0.233862	0.000523897	-0.235146	0.00113574	0.0537563	0.799441	0.255702	3.78117e-05	non-dropout
MANBA	1	0	0.247166	0.00105087	0.195818	0.0135557	0.434756	0.0136516	0.703723	2.19116e-17	non-dropout
MAP2	1	0	0.396148	0.00020419	1.40571	1.12322e-35	1.10996	7.09468e-07	0.370743	0.00267673	non-dropout
MARS	3	0	-0.301312	3.03561e-06	-0.525656	3.68453e-17	0.021285	0.926227	-0.136233	0.0251733	non-leukemia-specific dropout
MAT2A	5	0	-0.125881	0.0310248	-0.216576	0.000255159	-0.382351	0.0155309	0.350504	8.88878e-12	non-dropout
PIM3	8	0	-0.224367	0.00524774	0.204405	0.0926934	-0.502911	0.00549488	0.615262	1.29601e-22	non-dropout
MBNL1	13	0	-0.419826	1.12671e-13	0.0754664	0.31582	-0.0931983	0.6169	-0.124825	0.0166371	non-dropout
MBP	2	0	-0.183652	0.00543447	-0.314632	3.19156e-05	-0.295605	0.0714147	-0.269099	3.22029e-05	non-dropout
MCC	1	0	-1.22165	1.53269e-10	1.97519	1.02923e-20	1.21987	7.84891e-05	0.453604	0.00352026	non-dropout
MCL1	8	0	-0.237027	1.12922e-05	-0.179482	0.0406296	-0.39295	0.0176797	0.985511	4.42553e-68	AF9 specific
MCM2	7	0	-0.13674	0.0225996	-0.248169	0.00208087	-0.500348	0.00323333	-1.06735	1.83531e-71	non-leukemia-specific dropout
MCM3	6	0	-0.215929	0.000103252	-0.377185	3.08019e-10	-0.244277	0.13035	-0.226216	3.37502e-05	non-leukemia-specific dropout
MCM4	4	0	-0.328977	1.45672e-09	-0.445533	2.20805e-15	-0.297275	0.0619206	0.0380583	0.500163	non-leukemia-specific dropout
DNAJB9	1	0	-0.391271	4.7005e-06	-0.151549	0.114472	-0.129718	0.55794	0.904423	6.91142e-34	non-dropout
MDK	4	0	-0.268528	0.023617	-0.312321	0.0147854	-0.904483	1.09864e-05	-0.365632	0.000313962	non-dropout
ME1	6	0	0.883681	6.32132e-06	NA	NA	NA	NA	0.165762	0.504939	non-dropout
ME2	4	0	-0.18018	0.0368889	-0.164668	0.0853892	-0.116316	0.585807	0.508792	8.00448e-14	AF9 specific
MEF2D	14	0	0.233582	0.00242267	0.14548	0.10472	0.265745	0.112741	-0.555457	3.96189e-23	non-dropout
ARVCF	1	0	0.350172	0.0157745	0.522575	3.88076e-05	-0.382623	0.157501	1.06228	1.87396e-17	non-dropout
MAP3K1	4	0	-0.926604	5.70487e-35	0.895084	4.57468e-49	0.0254427	0.908016	-0.359745	3.82561e-06	non-dropout
MAP3K5	11	0	-0.81388	4.02165e-44	0.0441754	0.614066	-0.399045	0.0149741	0.220109	0.000643291	non-dropout
RAB8A	7	0	0.36686	1.14843e-07	-0.526458	2.38726e-09	-0.0749815	0.72248	-0.737172	9.61938e-28	non-dropout
MFAP1	4	0	-0.148791	0.0303089	-0.144673	0.109434	-0.180513	0.329121	0.442924	3.35871e-10	non-leukemia-specific dropout
MFAP3	1	0	-0.173675	0.0191136	0.188003	0.0143674	-0.0393168	0.855368	-0.0209815	0.777353	non-dropout
MGAT2	6	0	-0.39037	2.22591e-11	0.031698	0.777772	-0.479165	0.00323114	0.43619	1.54195e-10	non-dropout
MGAT3	1	0	1.23437	2.75373e-09	0.0106587	0.971426	1.93799	1.83849e-21	-4.51537	4.10418e-34	non-dropout
MGAT5	1	0	-0.349227	9.54972e-12	0.0137222	0.89216	-0.849022	7.93178e-10	0.270216	1.98118e-07	non-dropout
CIITA	6	0	-0.366591	6.12394e-09	0.210495	0.00854393	0.448931	0.00377383	-1.08573	1.07945e-51	non-dropout
ASAH1	4	0	0.574556	1.67704e-12	0.236517	0.0348298	0.499936	0.0111523	1.64985	9.95991e-75	non-dropout
MICB	1	0	-0.207797	0.00530321	0.0770039	0.485117	-0.248313	0.20379	-0.0268977	0.759474	non-dropout
MIF	6	0	-0.4099	3.91298e-08	0.0111186	0.949702	-0.690099	0.00109466	-0.221004	0.0363031	non-dropout
MKI67	4	0	-0.501151	1.22544e-23	-0.129777	0.10623	0.189243	0.341351	-0.3886	1.56545e-12	non-dropout
MAP3K9	1	0	0.529287	3.67343e-07	1.00657	2.09654e-21	0.490237	0.0360266	0.870958	4.65376e-08	non-dropout
AFF1	10	0	-0.397595	2.12332e-12	-0.0867035	0.225061	-0.52393	0.000343462	0.0621543	0.298232	non-dropout
MLLT6	10	0	0.188293	0.00862299	-0.0557768	0.555926	-0.218445	0.195963	-0.956568	3.55914e-58	non-dropout
MMP14	7	0	-0.3967	4.90441e-13	-0.631648	1.21197e-15	-0.278237	0.113338	-1.23267	6.85312e-74	non-dropout
MN1	1	0	0.526359	0.0394863	-0.147037	0.785789	NA	NA	NA	NA	non-dropout
MOCS1	1	0	-0.482057	0.0040133	0.624073	0.00749303	0.336521	0.381849	0.324083	0.155668	non-dropout
MPZ	1	0	0.595473	4.6194e-07	0.0197452	0.921989	-0.468709	0.0475507	-0.544089	0.00301341	non-dropout
ABCC1	2	0	-0.235671	0.000110872	0.0587009	0.478102	-0.310384	0.0640753	0.122503	0.0613479	non-dropout
MXRA7	3	0	0.348659	0.00909452	0.720707	1.38867e-12	0.423066	0.0596551	-0.023907	0.82154	non-dropout
ASNS	1	0	-0.450031	8.42376e-11	-0.532975	5.07043e-09	0.499679	0.00265569	0.463692	2.59826e-12	non-dropout
CCDC88C	1	0	0.233509	0.000178093	0.74712	2.44619e-33	-0.0911701	0.634876	-0.651812	3.64858e-22	non-dropout
GOLGA6L9	1	0	0.324654	0.0232286	0.515616	0.00210746	-0.190388	0.496466	0.634887	4.27623e-08	NA
HIST2H2BF	6	0	-0.343162	8.19684e-08	-0.376646	0.00278125	-0.326695	0.0640753	1.05406	6.73107e-42	non-dropout
THUMPD3-AS1	15	0	-0.171878	0.0400664	-0.223957	0.0112959	0.132194	0.500487	0.830652	6.47643e-42	NA
PTGER4P2-CDK2AP2P2	1	0	-2.25172	9.28175e-40	-0.706102	0.00241659	-1.34638	7.2833e-05	-0.119574	0.507657	NA
MIR196B	2	0	-1.13298	3.82528e-07	0.266628	0.378844	-0.889113	0.0289125	-0.057528	0.849395	NA
MYO1B	3	0	0.199562	0.00697145	-0.466679	1.7605e-10	0.0126349	0.958876	-0.300631	6.09137e-07	non-dropout
MSH2	8	0	-0.286993	0.000172539	-0.294154	5.48556e-05	0.0647239	0.763216	-0.119118	0.0928507	non-dropout
ASPH	5	0	-0.480053	3.00528e-09	-0.544309	1.25608e-10	0.0868725	0.681568	0.530713	4.30639e-20	non-dropout
MSX1	3	0	-0.660833	0.00144546	0.356988	0.175379	-0.236552	0.574497	2.22898	3.16204e-39	non-dropout
MT1F	1	0	-0.616997	0.023735	0.888932	0.00092097	-0.745462	0.0844671	-1.21393	0.000293072	non-dropout
MTF1	3	0	-0.128608	0.0433339	0.0175313	0.881252	-0.0211368	0.926227	0.476546	1.89875e-14	AF9 specific
MTHFD1	7	0	-0.183076	0.0279071	-0.459727	7.90159e-09	0.149135	0.418137	-0.83994	3.77255e-32	non-leukemia-specific dropout
MTHFR	8	0	0.391325	2.12824e-09	0.2658	0.000154084	-0.128079	0.525292	-0.23354	0.00123283	non-dropout
MTM1	7	0	0.269165	0.0269964	1.54395	4.90801e-58	0.459236	0.0423486	0.510453	0.000106951	non-dropout
MUC1	1	0	1.04881	0.00515563	0.474477	0.35345	NA	NA	-0.499809	0.221659	non-dropout
MVD	2	0	0.348699	0.011954	-0.697971	3.35177e-08	0.00736185	0.980506	0.520944	2.75137e-06	non-leukemia-specific dropout
MVK	4	0	-0.359389	0.000178651	-0.57518	8.13988e-07	-0.0928137	0.70129	0.484691	2.23366e-05	non-leukemia-specific dropout
MX2	2	0	1.05682	1.03691e-16	1.3306	4.14378e-36	0.638353	0.0079897	-0.429673	0.000491792	non-dropout
MXI1	12	0	0.497649	5.37782e-07	0.491325	7.61177e-09	-0.100299	0.679883	-0.362387	6.83359e-05	non-dropout
MYBPH	2	0	1.01822	0.00398518	NA	NA	3.42983	1.82582e-13	NA	NA	non-dropout
MYCL	7	0	-1.33061	2.67723e-12	-0.827865	0.000287866	-0.394779	0.324123	1.61202	6.87265e-16	non-dropout
MYD88	2	0	0.13401	0.0491579	-0.112411	0.237873	-0.268317	0.176104	-0.0905406	0.248116	non-dropout
GADD45B	6	0	0.59941	2.74008e-12	-0.334619	5.26321e-05	0.303825	0.107156	1.2986	6.16575e-80	non-dropout
MYH10	1	0	0.238403	0.000296837	0.191303	0.0129135	0.0625286	0.784067	0.194712	0.00828631	non-dropout
ZFHX3	1	0	-0.565128	9.72474e-24	0.552624	6.42296e-14	0.0560401	0.791346	0.125947	0.0436649	non-dropout
MYLK	1	0	0.330974	0.0365441	-0.194058	0.297872	0.40784	0.106927	-2.48793	4.56021e-34	non-dropout
MYO1D	1	0	0.256595	0.00817807	0.374179	0.00523445	0.346307	0.106338	0.308044	0.0113172	non-dropout
MYO1E	22	0	-0.367604	5.29894e-07	0.0725263	0.525354	0.900285	2.05183e-08	0.425973	3.19781e-09	non-dropout
NAB2	12	0	0.216154	0.0174122	-0.236271	0.00645471	-0.0209794	0.926227	-0.469514	9.81981e-12	non-dropout
NAGA	1	0	-0.269338	0.0107666	-0.375856	0.000252014	-0.282127	0.175694	0.79892	1.78421e-16	non-dropout
ATF3	12	0	0.183989	0.0498978	-0.837132	1.10219e-18	-0.321768	0.0797665	1.08196	2.07426e-38	non-dropout
NARS	5	0	-0.19471	0.00197892	-0.465436	1.4655e-11	-0.0391004	0.855022	-0.151667	0.0150014	non-leukemia-specific dropout
NBN	2	0	0.291188	1.87187e-05	-0.0397136	0.663399	0.117041	0.548337	-0.378652	1.33008e-10	non-dropout
NCK1	2	0	-0.217929	0.00495402	0.152797	0.116282	-0.121888	0.579919	0.487148	7.79961e-08	non-dropout
NDUFA10	3	0	0.355028	2.94787e-07	0.111442	0.249128	0.159538	0.40094	-0.386648	1.13995e-07	non-dropout
NDUFB10	3	0	-0.260318	0.0420133	0.107467	0.549516	-0.299687	0.25602	0.298683	0.0716212	non-leukemia-specific dropout
NDUFC1	1	0	-0.408462	0.000349311	-0.354474	0.00265883	-0.340822	0.167239	0.0186976	0.892588	non-dropout
NDUFS1	1	0	0.166632	0.021492	-0.167774	0.0485004	0.186514	0.308587	0.0128394	0.879697	non-leukemia-specific dropout
ATM	4	0	0.278654	6.79939e-07	0.42462	1.14814e-08	0.459734	0.00434827	0.0405432	0.536413	non-dropout
NDUFV1	4	0	0.178139	0.0445487	0.232783	0.0142749	-0.306674	0.149465	0.410464	1.06522e-05	non-leukemia-specific dropout
2002-09-01	9	0	0.150089	0.015978	-0.0550046	0.609213	0.188391	0.312272	0.00313655	0.963543	non-dropout
RPL10A	2	0	-0.168401	0.00998676	0.0361798	0.745011	-0.61628	0.000429209	0.328901	4.55283e-08	non-leukemia-specific dropout
NEDD9	9	0	-0.302532	0.000601471	0.460368	3.68911e-05	0.122544	0.641075	0.819627	1.52684e-16	non-dropout
NEK2	2	0	-0.31104	0.000399339	-0.193469	0.0799416	-0.0652714	0.801399	0.829372	6.11095e-25	non-dropout
ATP1A1	13	0	-0.15012	0.017063	-0.266361	0.000229608	-0.376475	0.0163219	0.14213	0.0118767	non-dropout
NFIA	1	0	0.376606	0.00280908	1.14955	5.81669e-20	0.638167	0.0187412	0.137754	0.415474	non-dropout
NFATC4	2	0	0.862908	0.00080692	0.893996	0.00105868	2.93928	3.34388e-07	-1.95255	8.31536e-05	non-dropout
NFE2	5	0	1.2158	4.34354e-19	-2.67431	3.30975e-24	2.22094	2.37823e-17	-3.96208	9.87672e-16	non-dropout
NFIX	19	0	-0.370489	0.00415058	0.321191	0.00183635	-0.419719	0.033346	-0.538759	1.70059e-07	non-dropout
NFKBIA	2	0	-0.468712	6.39726e-15	0.223083	0.0153304	-0.28651	0.126871	0.148077	0.0469455	non-dropout
NFKBIE	3	0	0.252767	0.00240069	0.22841	0.104446	-0.0438487	0.873469	-0.419969	1.35912e-08	non-dropout
NFKBIL1	3	0	0.301678	0.0453397	0.0687139	0.72686	-0.28332	0.31118	-0.836513	7.59495e-05	non-dropout
NFYC	7	0	-0.193889	0.0045363	-0.129145	0.126037	-0.0341256	0.884534	-0.472482	1.18717e-09	non-leukemia-specific dropout
NHS	1	0	2.88071	4.98935e-131	-1.59268	0.0170057	3.18176	1.02857e-23	NA	NA	non-dropout
NINJ1	3	0	0.403959	0.0385376	0.604662	0.000167475	0.831972	0.00153925	-0.589833	0.0013391	non-dropout
NINJ2	3	0	0.778007	0.000773953	0.239056	0.571147	0.973483	0.0387913	NA	NA	non-dropout
NIT1	7	0	-0.222291	0.0274045	-0.0081934	0.953175	-0.192924	0.426602	0.761964	1.40805e-14	non-dropout
NKTR	3	0	0.147211	0.0173357	-0.157752	0.110961	0.185524	0.329038	0.225886	3.22798e-05	non-dropout
NQO2	2	0	0.575724	2.65697e-05	0.000154364	0.999479	0.110617	0.749542	0.813765	1.3011e-12	non-dropout
NMT1	6	0	0.245974	0.000133872	-0.0367526	0.702177	-0.119027	0.532104	-0.170976	0.00894826	non-dropout
NOTCH1	5	0	-0.183479	0.00339704	0.256697	0.00986555	-0.669113	5.48503e-05	0.664417	6.31487e-12	non-dropout
NOTCH2	8	0	-0.460391	2.40494e-11	0.745875	1.46314e-25	0.379353	0.0283084	0.159581	0.0259131	non-dropout
NPAS2	3	0	0.550552	0.000216885	0.958361	0.000111871	-0.160559	0.752765	-3.23466	6.65192e-35	non-dropout
NPC1	5	0	0.221618	8.13149e-05	0.240768	0.000574361	-0.177288	0.324662	0.422178	5.47342e-11	non-dropout
NPR1	1	0	-2.47529	3.30365e-09	NA	NA	NA	NA	-2.88815	4.6999e-13	non-dropout
ATP2A3	4	0	0.607939	7.22832e-10	0.153479	0.126898	0.754478	2.38751e-06	-0.231374	0.00264687	non-dropout
NRAS	12	0	-0.195391	0.00227122	-0.154131	0.0523112	-0.163871	0.373525	-0.430672	1.47329e-10	non-dropout
ATP2B1	2	0	-0.204366	0.00317345	-0.43161	2.66598e-10	0.287063	0.115298	-0.125618	0.0918733	non-dropout
NT5E	13	0	-0.442084	1.37959e-07	0.0436183	0.76746	-0.222532	0.352171	-0.196902	0.141901	non-dropout
ROR1	1	0	1.21791	9.92949e-17	3.05958	1.11469e-154	3.26366	2.82484e-51	0.393504	0.0966252	non-dropout
NUCB2	2	0	0.392551	1.4531e-08	-0.327693	0.00180121	0.501688	0.00938504	-0.690734	8.8984e-21	non-dropout
NR4A2	14	0	0.871926	6.65018e-19	0.755256	3.11026e-11	0.893516	4.28898e-05	-0.695804	4.46755e-15	non-dropout
ATP2B4	6	0	0.504246	3.08488e-20	-0.0302979	0.763117	0.674149	4.73548e-05	0.0147626	0.887079	non-dropout
OAS1	4	0	0.347824	0.00829989	0.257462	0.32994	-0.160895	0.74627	-0.914068	0.000205307	non-dropout
TRIM72	1	0	0.272702	0.00943297	0.960968	7.0199e-24	0.432502	0.0384066	-1.75575	8.77123e-22	non-dropout
OAS3	4	0	-0.310592	0.0018762	-0.361709	0.0017492	-0.642395	0.00414648	-1.47394	6.97274e-30	non-dropout
OAZ1	11	0	-0.216331	0.00145578	-0.135262	0.208867	-0.404742	0.0214668	0.949929	3.75205e-54	non-dropout
OGDH	2	0	-0.20804	0.0104949	0.219558	0.0506804	-0.132067	0.552026	0.801267	2.14368e-12	non-dropout
OGG1	4	0	0.642423	1.62765e-18	1.10345	1.34228e-26	0.547938	0.00414711	-0.846847	4.78222e-20	non-dropout
OPHN1	5	0	0.372478	0.00529144	1.24498	8.49307e-19	0.600613	0.0435494	0.415375	0.00695573	non-dropout
ZBTB21	14	0	0.252702	0.00813979	0.104552	0.244308	0.273241	0.137349	-0.588704	2.83799e-24	non-dropout
ACO2	3	0	0.245553	0.000310733	0.189448	0.0805342	-0.327901	0.0858284	0.211849	0.00425416	non-dropout
ALDH7A1	3	0	-0.424199	0.00329213	-0.599025	3.56004e-08	0.219372	0.354855	0.443239	2.47084e-06	non-dropout
OTX1	8	0	-0.59859	9.65169e-05	-0.196258	0.469824	-0.0868052	0.822533	-0.564953	0.00295083	non-dropout
OXA1L	1	0	0.152539	0.0285674	-0.0173294	0.871985	-0.0499402	0.813133	-0.368861	1.46316e-07	non-dropout
P2RX1	8	0	0.457729	1.12299e-05	0.689397	5.05658e-23	0.52458	0.00286665	-1.50794	2.51002e-63	non-dropout
P2RY1	1	0	-0.43904	0.000107072	-0.0108772	0.940931	-0.0124106	0.967063	0.441363	3.77636e-06	non-dropout
P4HA1	4	0	-0.29941	0.000428699	-0.118896	0.282505	-0.25898	0.161106	1.1683	6.33709e-86	AF4 specific
FURIN	3	0	-0.2877	6.14293e-05	0.274189	0.0100028	-0.381718	0.0353871	-0.790582	8.67812e-20	non-dropout
PCSK6	4	0	-0.449683	3.81832e-09	0.821276	1.19467e-21	0.171351	0.406302	0.0990075	0.368077	NA
RRM2B	3	0	0.323961	1.19933e-05	-0.0917279	0.393178	0.595092	0.000769487	0.732941	1.20875e-33	non-dropout
MINK1	6	0	0.210989	0.0128987	0.567512	4.8075e-10	-0.113299	0.640437	0.140933	0.181083	non-dropout
PAFAH1B3	8	0	0.376811	0.00179742	0.0354646	0.888215	0.0194573	0.960082	0.508309	0.00192298	non-dropout
CHST11	6	0	-0.410677	1.43701e-08	-0.0409509	0.69154	-0.159412	0.40043	0.283728	2.43126e-05	non-dropout
PRDX1	3	0	-0.288245	1.63827e-05	0.441823	1.96445e-11	-0.867065	1.26092e-08	0.0530321	0.398897	non-dropout
IL21R	2	0	-0.734957	1.68745e-41	-0.857235	7.91408e-35	-0.0722226	0.717678	-0.748538	2.22954e-35	non-dropout
ITSN2	5	0	-0.245023	0.000517851	0.413765	2.04831e-08	0.132231	0.496909	-0.313488	4.22368e-05	AF9 specific
DEF6	3	0	0.251275	0.00116712	0.301065	0.000177754	-0.0911304	0.671325	-1.8144	4.42527e-69	non-dropout
GEMIN4	1	0	-0.187479	0.00147298	-0.115213	0.231043	-0.480831	0.00772186	-0.435675	2.02281e-13	non-leukemia-specific dropout
ARHGEF3	6	0	0.487802	1.18773e-11	-0.0373543	0.730501	0.724571	0.00199411	-0.434577	1.33008e-05	non-dropout
PAM	2	0	-0.256792	0.00063919	0.29262	0.0128461	0.0364466	0.911307	0.285418	0.00107624	non-dropout
MYEF2	4	0	0.19032	0.0273634	-0.1509	0.21115	0.61215	0.00118553	-0.195322	0.0192185	non-dropout
ASAP1	4	0	-0.297977	8.50375e-05	0.764628	1.32986e-26	0.302267	0.075971	0.350508	2.76879e-08	non-dropout
AK3	3	0	0.267888	0.000505663	0.0116649	0.917006	0.172866	0.38828	0.304005	6.65358e-05	non-dropout
F11R	5	0	0.362858	1.04148e-08	0.351683	2.06554e-06	-0.0279781	0.913767	0.56868	2.10752e-13	non-dropout
VILL	6	0	-0.349582	9.55684e-06	0.0924369	0.533832	-0.538102	0.00760285	-0.71527	1.62292e-08	non-dropout
PBX3	3	0	-0.756356	6.12019e-33	0.408792	1.51312e-10	-0.804371	1.37073e-07	0.205287	0.00243312	non-dropout
PC	10	0	-0.245235	0.0096689	0.268648	0.0252235	-0.496112	0.0437965	0.451104	0.00144498	non-dropout
PCBD1	1	0	0.612856	0.00861946	0.753105	0.0107288	0.134731	0.804112	-1.50218	1.14612e-05	non-dropout
PCCA	2	0	0.449395	0.000167516	0.287187	0.0286082	0.558441	0.00792641	0.264004	0.0171439	non-dropout
PCCB	2	0	0.177086	0.0315163	0.00156678	0.990978	0.013625	0.960082	-0.626362	1.01681e-12	non-dropout
PCDHGC3	10	0	-0.424972	3.65392e-15	-0.467199	7.41089e-10	-0.146559	0.416421	-1.01258	2.53594e-47	non-dropout
ACOX1	5	0	0.180261	0.028811	-0.0744048	0.559651	0.106445	0.672412	0.724739	7.71601e-20	non-dropout
MTERF3	4	0	-0.193318	0.0457018	-0.349727	0.00198775	0.0932587	0.696844	0.691047	1.70734e-20	NA
ASCC1	3	0	-0.246377	0.00234574	-0.0589381	0.668409	-0.0144577	0.958636	-0.0801896	0.437061	non-dropout
PCDH9	5	0	0.95941	5.22106e-14	-0.0232262	0.935422	1.4373	5.31964e-09	2.37508	7.64444e-70	non-dropout
EMC9	1	0	-0.365133	0.000770476	0.0939263	0.518351	-0.696442	0.00189612	1.63716	8.70101e-41	non-dropout
HDDC2	1	0	-0.227021	0.00313556	0.00355495	0.977004	-0.14145	0.490475	-0.543769	6.2211e-10	non-dropout
DESI2	8	0	-0.274275	2.2357e-05	-0.284583	5.40648e-05	-0.127811	0.502399	0.985651	1.062e-32	non-dropout
UBXN1	6	0	0.201016	0.0288294	0.0812879	0.456526	-0.361817	0.0781596	0.204544	0.0140815	non-dropout
ZBTB7B	11	0	0.808001	2.49034e-15	0.586993	2.01536e-05	0.301295	0.209605	-1.82606	1.78046e-29	non-dropout
GMNN	3	0	-0.257957	0.00010761	-0.38074	1.86006e-07	-0.0815016	0.702959	0.143721	0.0298085	non-dropout
LAP3	4	0	-0.157391	0.04174	-0.349234	8.84634e-06	-0.310875	0.0831684	1.5552	5.30607e-93	non-dropout
PCK2	4	0	-0.424424	6.25248e-12	-0.776238	2.33919e-17	0.22812	0.207523	0.272013	0.000224521	non-dropout
ATL1	2	0	1.545	1.70672e-11	0.450302	0.245536	1.47589	0.00211795	0.194223	0.554966	non-dropout
CALHM2	1	0	-0.448287	1.75997e-08	-0.0892183	0.592973	-0.0895039	0.753382	-1.0827	2.81331e-16	non-dropout
KLHL5	3	0	0.458164	5.8832e-06	0.170711	0.243529	1.32135	7.13219e-11	-0.194139	0.135783	AF9 specific
SCCPDH	5	0	0.968469	2.46439e-33	0.595989	3.24419e-11	1.54991	1.51437e-21	-0.0906664	0.497038	non-dropout
PCMT1	4	0	-0.224688	0.008641	-0.119298	0.276991	-0.1474	0.4949	0.830322	3.899e-20	non-dropout
ABHD17B	10	0	-0.350426	6.85816e-08	0.111138	0.183521	-0.638788	1.76786e-05	0.791052	5.81021e-44	non-dropout
PHF20L1	3	0	0.173441	0.00656448	-0.133657	0.091126	0.287586	0.106005	0.302764	2.59555e-06	non-dropout
PHF11	4	0	0.329509	0.000728868	0.226859	0.038974	0.0834851	0.769647	-0.527057	1.93608e-06	non-dropout
KCTD3	1	0	-0.284113	0.000249669	-0.2745	0.00202305	0.148797	0.451848	-0.0991772	0.228382	non-dropout
RNFT1	7	0	0.345495	0.000226804	0.122683	0.384677	0.707243	0.00183294	0.696577	1.02209e-10	non-dropout
HSD17B12	3	0	-0.180335	0.0170914	0.108395	0.191041	0.020944	0.934054	0.133575	0.0371117	non-dropout
CYB5R4	3	0	0.207847	0.0154306	-0.0540418	0.659525	0.347272	0.0764359	0.546865	7.19986e-11	non-dropout
TUBD1	1	0	-0.435729	0.00251053	-0.299756	0.027709	-0.218433	0.421668	-0.21522	0.134795	non-dropout
PLEKHO1	9	0	-0.374186	1.87817e-07	-0.276505	0.000911427	-0.686658	2.00885e-05	-0.680666	2.03754e-24	non-dropout
CRBN	3	0	0.158343	0.0464723	-0.13499	0.102672	0.0902195	0.689731	0.295023	1.85553e-05	non-dropout
RSL24D1	4	0	-0.219314	0.000792976	-0.259298	0.00498474	-0.139635	0.464175	-0.183187	0.00366626	non-dropout
ZNF639	1	0	-0.360666	2.49112e-07	-0.149899	0.0925094	-0.239961	0.157308	-0.471631	1.14914e-14	non-dropout
NIN	6	0	-0.149015	0.0130871	0.133861	0.0639734	-0.0848742	0.660164	0.0119837	0.853261	non-dropout
NUSAP1	5	0	-0.419851	1.08738e-13	-0.368478	6.43925e-07	-0.211574	0.28035	0.453183	1.92613e-15	non-dropout
ZNF219	12	0	0.466275	0.00362091	0.25921	0.289024	-0.00548869	0.990738	-1.07684	0.00083101	non-dropout
PHF20	10	0	-0.261702	0.000173307	-0.0654291	0.458503	0.0179417	0.939287	0.265535	6.23514e-05	non-dropout
CRIM1	1	0	0.423197	5.39037e-05	0.517824	1.73625e-14	0.817022	8.49657e-08	-0.0415858	0.602862	non-dropout
HGH1	1	0	-0.250612	0.00344577	0.0820412	0.566037	-0.473789	0.0423494	1.22095	7.86067e-43	NA
ANKRD39	1	0	0.298727	0.0284199	0.0923987	0.624951	-0.242416	0.343861	-0.229991	0.188295	non-dropout
TMEM69	4	0	-0.201528	0.012298	-0.170853	0.111836	-0.250169	0.211901	-0.261414	0.0103092	non-dropout
TBC1D7	1	0	0.38664	3.09914e-09	0.492237	2.75759e-09	0.271227	0.231871	0.272675	0.00348095	non-dropout
MAPKAPK5-AS1	1	0	-0.265596	0.00411394	0.373206	0.000326767	-0.43264	0.0267072	0.214685	0.017062	NA
SCAND1	4	0	-0.37994	0.000183809	-0.0319394	0.843022	-0.692779	0.00222512	-0.023869	0.8753	non-dropout
COA4	1	0	-0.209187	0.019308	-0.0632536	0.590556	-0.111824	0.64106	-0.0199275	0.851568	non-dropout
ERGIC2	5	0	0.223685	0.0190923	-0.251199	0.00565084	0.226063	0.268462	-0.641868	2.75822e-19	non-dropout
PCDH12	1	0	-1.33928	2.21396e-10	-0.153105	0.695502	0.00679706	0.991735	NA	NA	non-dropout
PCYT1A	3	0	0.254311	0.0012693	0.229068	0.0510381	-0.0765028	0.762908	0.329549	0.000676149	non-leukemia-specific dropout
FAM13B	4	0	0.199811	0.00190777	0.126171	0.155697	0.312573	0.0725788	0.634768	9.01468e-28	non-dropout
KRCC1	6	0	-0.300881	0.0159669	0.0567815	0.72483	0.385502	0.16534	0.76293	1.82704e-07	non-dropout
PHF21A	1	0	0.233131	0.0170404	0.198844	0.038872	0.380703	0.0671739	0.376078	9.85826e-07	non-dropout
MEX3C	10	0	-0.301032	7.95061e-06	-0.0432929	0.636594	-0.115399	0.542804	0.0869263	0.168945	non-dropout
SPG21	6	0	0.227159	0.00433419	0.0225986	0.886169	0.342395	0.116989	-0.465739	3.85515e-06	non-dropout
ARL6IP4	1	0	-0.194849	0.0218511	0.00273766	0.98599	-0.447602	0.0279066	0.0523306	0.652349	non-dropout
PDCD1	1	0	1.08251	0.00014305	NA	NA	NA	NA	NA	NA	non-dropout
TNFRSF12A	4	0	0.546467	1.63616e-05	-0.332008	0.120237	-0.136686	0.631252	1.22328	6.46353e-37	non-dropout
ZNF771	5	0	0.312089	0.00294277	0.294016	0.0121024	-0.241264	0.260997	-0.0782413	0.5678	non-dropout
THEM6	1	0	-0.520923	6.89941e-09	0.0810577	0.60463	-0.685061	0.0038225	-0.413233	0.00336739	non-dropout
DACT1	1	0	1.11408	5.31502e-14	2.1874	2.93836e-44	2.43005	2.09188e-26	0.83776	0.000514052	non-dropout
PDCD2	1	0	-0.244411	0.000120378	0.0118572	0.909039	-0.281044	0.099881	0.109371	0.0973901	non-leukemia-specific dropout
CHST15	1	0	-0.185027	0.00933785	-1.0291	2.85033e-37	-0.0648683	0.760924	-0.0650745	0.510096	non-dropout
TEX264	2	0	-0.294862	0.000835709	0.0798175	0.671836	-0.56521	0.00404827	-1.40691	2.62293e-35	non-dropout
ATRAID	2	0	-0.179686	0.0414612	0.0786235	0.57617	-0.231863	0.279625	-0.302985	0.00743617	non-dropout
ZNF589	5	0	-0.325669	8.08978e-06	-0.587842	1.24139e-12	-0.00163521	0.995508	1.15031	8.74323e-54	non-dropout
TRPV2	1	0	0.374406	0.0029981	0.555547	2.93188e-06	0.506909	0.0118273	-2.84305	7.70477e-79	non-dropout
PDE3B	3	0	-0.289005	2.17103e-05	-0.045658	0.576438	-0.208656	0.244899	0.204017	0.000863654	non-dropout
PPME1	6	0	0.321631	0.000341753	0.178532	0.121265	0.130004	0.554479	0.944046	2.49819e-23	non-dropout
PDE4A	1	0	0.622584	4.03159e-13	0.309235	0.00144088	0.515523	0.00675476	-0.769155	1.24453e-10	non-dropout
PRKAG2	4	0	0.335492	2.01047e-06	-0.059993	0.584118	0.230372	0.294899	0.0291278	0.762685	non-dropout
SNX9	1	0	0.572073	1.13518e-14	0.874925	2.16626e-23	1.34498	4.23807e-14	-1.42091	2.54747e-40	non-dropout
SUCO	4	0	0.207046	0.0081918	-0.196129	0.0101604	0.0482143	0.823127	0.309133	1.95569e-07	non-dropout
ANAPC5	6	0	0.14734	0.048614	-0.0709205	0.483026	0.0887344	0.664745	0.323325	4.53303e-06	non-dropout
ANAPC7	1	0	0.155581	0.0233181	-0.258497	0.00422163	0.214603	0.248413	-0.121253	0.0746038	non-dropout
FAM8A1	1	0	-0.538241	7.08773e-15	0.237019	0.00702254	-0.446117	0.0105556	-0.481874	3.98666e-16	non-dropout
PDE4D	5	0	0.779055	3.05478e-18	0.282126	0.0223164	1.22448	1.87123e-10	-0.970114	4.05204e-18	non-dropout
PCYOX1	3	0	-0.29501	0.00790307	-0.00139921	0.99332	0.0183694	0.954781	0.869719	1.09375e-32	non-dropout
SFMBT1	9	0	0.26024	0.000596752	-0.0178372	0.884617	-0.0764162	0.737867	-0.697209	1.0477e-16	non-dropout
UBE2J1	2	0	-0.595109	2.54434e-23	0.0803311	0.348192	-0.174229	0.336592	-0.689853	2.72612e-30	non-dropout
EVL	12	0	-0.261031	0.00131492	0.458996	2.4265e-07	-0.424225	0.0230057	-1.60859	1.95185e-43	non-dropout
NOP16	6	0	-0.205024	0.00486075	-0.234447	0.0117819	-0.654285	0.00019368	-0.253761	0.00224565	non-leukemia-specific dropout
TRIAP1	1	0	-0.196742	0.0344267	-0.0747777	0.545749	-0.5649	0.00233998	0.298149	0.00159453	non-leukemia-specific dropout
PDE7A	18	0	-0.493844	1.90588e-13	-0.458558	7.02211e-08	-0.242994	0.21987	-0.0299559	0.699566	non-dropout
RTFDC1	1	0	0.213841	0.00429887	0.1148	0.223228	-0.0310355	0.900598	-0.272349	0.00383562	non-dropout
PDE8A	1	0	0.15926	0.0353702	0.459436	1.09786e-07	0.367249	0.0428831	-0.260078	0.00178498	non-dropout
CHMP5	4	0	0.330008	4.182e-05	0.0336749	0.846595	0.317471	0.134755	0.342437	0.00154591	non-dropout
GTSE1	2	0	-0.374947	3.80376e-08	-0.52215	3.72661e-13	-0.0860934	0.686005	-0.755469	1.64796e-29	AF9 specific
NCKIPSD	3	0	0.260709	0.0208969	-0.130751	0.368428	-0.0565325	0.822533	0.260338	0.0159477	non-dropout
LARS	7	0	-0.223544	0.002453	-0.308835	0.000455271	0.23487	0.225702	-0.624473	1.3745e-21	non-dropout
CXXC5	22	0	0.125688	0.0399586	0.323779	0.000103344	0.010051	0.966839	-0.467483	2.63385e-06	non-dropout
OSER1	9	0	-0.188294	0.00387886	-0.304191	0.000115886	-0.168235	0.376514	1.05359	2.21321e-53	non-dropout
ANAPC11	4	0	-0.308077	0.00197437	-0.420407	2.83991e-05	-0.301915	0.157302	0.376089	0.00039303	non-dropout
PDE1B	15	0	0.501254	8.65356e-07	0.591213	8.0803e-12	0.527621	0.00495134	0.0247846	0.846055	non-dropout
PHF7	6	0	0.468863	2.15523e-05	0.131817	0.233448	0.56546	0.00373706	0.516807	7.28697e-07	non-dropout
PPHLN1	2	0	0.22014	0.0111427	0.38833	1.92989e-06	0.130612	0.554479	-0.00414033	0.964709	non-dropout
ZCCHC17	4	0	0.25511	0.0173949	-0.00710495	0.974934	0.0993894	0.742656	1.70536	7.87963e-58	non-dropout
NT5DC3	3	0	0.165624	0.0164998	-0.181913	0.0261908	0.0460127	0.842648	0.640484	4.59338e-23	non-dropout
ESF1	1	0	-0.219849	0.0200973	-0.299312	0.00982258	0.223188	0.330028	0.155901	0.0158371	non-dropout
PDE6B	1	0	0.357599	0.00343421	0.270696	0.0990596	0.056746	0.862287	-0.435355	0.00641087	non-dropout
PCF11	4	0	-0.130573	0.0466689	0.0145775	0.875013	0.195509	0.269379	0.0875409	0.134369	non-dropout
PDGFRB	1	0	0.24227	0.000182906	0.0235296	0.827509	0.980285	1.47362e-12	-2.50646	5.37013e-252	non-dropout
NBAS	3	0	0.17408	0.00563418	0.118927	0.124796	0.0600212	0.779381	0.0763423	0.343054	non-dropout
LIPT1	3	0	-0.352567	0.00907994	0.0811261	0.495282	-0.133982	0.576055	-0.589559	1.47655e-07	non-dropout
ATP6V1H	4	0	0.273941	0.000115472	0.0949858	0.314691	0.0134066	0.961659	0.0652843	0.467353	non-dropout
UBE2D4	2	0	0.492477	0.00948232	0.639375	0.00252498	-0.0354562	0.933065	0.642254	0.000228104	non-dropout
PDK1	1	0	-0.193808	0.0078823	0.209392	0.0061042	-0.0412236	0.856682	-0.135269	0.0272947	non-dropout
TMBIM4	4	0	0.232913	0.0494727	0.0919059	0.640911	0.40566	0.0692271	-1.12463	2.42486e-23	non-dropout
PPIL1	8	0	-0.247756	0.000959965	-0.172563	0.107686	-0.225037	0.259436	-0.763473	5.27362e-19	non-leukemia-specific dropout
YPEL5	4	0	0.380676	3.60642e-07	0.517101	4.87225e-10	0.480518	0.00883552	0.618931	1.9439e-14	non-dropout
NUB1	4	0	0.206362	0.0100993	0.431275	1.09793e-07	0.148938	0.477732	-0.235613	0.0113172	non-dropout
ENPP2	1	0	1.86121	2.24854e-14	0.517262	0.201147	2.34873	0.00110847	NA	NA	non-dropout
LSM8	2	0	0.202079	0.0140536	-0.0113974	0.931479	0.423544	0.0223914	0.712572	1.37414e-34	NA
HECA	9	0	-0.25828	2.18485e-05	0.0356345	0.732494	0.208183	0.250692	-0.0135393	0.854526	non-dropout
CYB5R1	1	0	0.563988	3.54478e-07	0.0917627	0.549964	-0.431876	0.0558331	0.362771	0.00214863	non-dropout
RAB23	1	0	-0.653249	1.08184e-06	-0.729746	1.23355e-08	0.0550944	0.874209	0.843304	2.22067e-10	non-dropout
POLR3K	10	0	-0.179419	0.0271594	-0.395536	4.64457e-05	-0.239853	0.22198	0.162105	0.0738283	non-leukemia-specific dropout
MSRB1	8	0	0.434674	0.00174178	0.286734	0.170615	-0.125007	0.720576	1.19006	1.03915e-10	non-dropout
PECAM1	6	0	-0.598687	1.23587e-09	-1.23572	6.00418e-12	0.830614	0.000318902	-1.00422	5.72356e-24	NA
ERAP1	4	0	-0.161105	0.0150004	-0.282624	2.53375e-05	-0.255525	0.133808	-1.00983	1.23611e-57	non-dropout
C9orf78	2	0	0.218319	0.0102669	-0.0907889	0.567042	-0.00675065	0.983009	-0.0576046	0.522427	non-dropout
RAB8B	6	0	0.282707	7.17569e-05	-0.298307	0.000442941	-0.0447783	0.8607	-0.0713074	0.474113	non-dropout
INPP5K	1	0	0.254484	0.00433775	-0.0859959	0.53453	0.0894728	0.716818	0.830907	1.08632e-16	non-dropout
ATP5G3	4	0	-0.169184	0.0156199	-0.183548	0.0153362	-0.371715	0.0292562	0.4514	3.62543e-13	non-dropout
TUBA8	5	0	-0.639399	3.99156e-13	-0.0128597	0.946173	0.0585939	0.822458	-2.4319	3.60934e-117	non-dropout
GALNT7	7	0	-0.417642	4.84457e-10	-0.0687781	0.55048	-0.00753218	0.977082	-0.192608	0.00547647	non-dropout
PEPD	3	0	0.242747	0.0258119	0.136306	0.352531	-0.243793	0.311581	0.321629	0.0116195	non-dropout
GATB	1	0	0.304548	0.00086184	-0.0552119	0.707698	-0.0379016	0.892798	-1.0424	1.36146e-13	NA
PEX1	2	0	0.282893	0.000631088	-0.0515556	0.641358	0.364332	0.0521105	0.546493	5.12066e-11	non-dropout
PEX6	3	0	-0.356342	9.45042e-06	0.035778	0.792711	-0.267026	0.227538	0.52293	1.36252e-05	non-dropout
PEX12	2	0	-0.394768	2.54593e-06	0.0922393	0.466143	-0.372692	0.0866043	-0.871637	7.45632e-13	non-dropout
PFDN5	5	0	0.199547	0.0292865	0.16261	0.126375	-0.222663	0.302887	-0.0662574	0.504254	non-leukemia-specific dropout
PFKFB4	2	0	0.700853	9.7731e-06	-0.25634	0.0949431	-0.344034	0.281493	0.280723	0.0588808	non-dropout
PFKL	2	0	0.178405	0.0286801	0.537792	5.62315e-10	0.297943	0.124913	-0.573276	1.33107e-13	non-dropout
PFKP	1	0	0.21368	0.000462395	-0.0273183	0.774238	-0.427546	0.00767548	-0.102085	0.132082	non-dropout
PFN1	7	0	-0.219262	0.000845991	-0.11549	0.202895	-0.576541	0.000353109	-0.000931771	0.99082	non-leukemia-specific dropout
PFN2	1	0	0.593947	0.000997653	1.19536	2.37903e-12	1.03909	2.35064e-05	-0.279481	0.0444606	non-dropout
CDK14	2	0	-0.197837	0.000366569	-0.0792104	0.237542	-0.791683	1.28383e-08	0.0599209	0.280481	non-dropout
PGD	2	0	0.343831	2.45413e-07	-0.0363234	0.738775	-0.25496	0.160151	1.17355	2.59301e-82	non-leukemia-specific dropout
PGGT1B	2	0	0.164064	0.0254753	-0.131013	0.184987	0.193193	0.328327	-0.693214	8.57491e-21	non-leukemia-specific dropout
ATP6V1A	2	0	0.255739	0.00664921	-0.215156	0.0372665	0.335043	0.106642	0.0731031	0.413419	non-leukemia-specific dropout
PGM1	6	0	0.288268	0.00994511	0.0468714	0.741744	-0.229621	0.281674	0.264666	0.0188281	non-dropout
ABCB1	5	0	0.513261	0.00981893	0.200144	0.385957	1.39301	1.03356e-06	1.30914	5.02803e-23	non-dropout
ABCB4	5	0	0.397929	1.62865e-08	0.136741	0.342792	0.470074	0.0165972	-1.42129	1.11847e-45	non-dropout
PHB	5	0	-0.324453	3.26106e-05	-0.0155053	0.915213	-0.383024	0.0747837	0.527014	7.56489e-07	non-leukemia-specific dropout
PHF1	9	0	0.324516	0.0206443	0.19646	0.0966322	-0.1594	0.515843	0.241286	0.034219	non-dropout
PHF2	1	0	-0.190561	0.00485976	0.0260612	0.821538	-0.154964	0.437165	-0.696095	2.73975e-15	non-dropout
PHKB	9	0	0.308595	3.67129e-07	-0.0611866	0.547574	0.16725	0.401534	-0.0837541	0.214551	non-dropout
SERPINE2	1	0	-0.490984	1.07343e-05	-0.220825	0.189032	0.235063	0.438456	1.48401	5.88975e-52	non-dropout
SERPINI2	1	0	0.888682	8.18729e-05	0.520982	0.225472	2.08275	3.67758e-05	NA	NA	non-dropout
PIGC	1	0	-0.209312	0.00735521	-0.0791462	0.47855	-0.173785	0.407422	-1.16212	2.20981e-30	non-dropout
ATP6V1C1	5	0	0.294551	0.00111699	-0.195204	0.0366291	0.426635	0.028574	-0.0709454	0.492991	non-dropout
PIK3C2B	1	0	-0.459998	2.57177e-14	-0.284717	2.90676e-05	-0.164906	0.348752	-1.28427	1.47726e-111	non-dropout
PIK3C3	9	0	0.331506	2.40056e-07	0.228808	0.00408812	0.195438	0.301549	-0.0138405	0.872102	non-dropout
[truncated: 1,852 more rows]

## Sheet: KMT2A-AFF1 GRN edges
	Geneid.from	Geneid.to
	EGR1	ADA
	FOSL2	GNPDA1
	ARNT	GNPDA1
	MYC	GNPDA1
	RREB1	GNPDA1
	STAT1	GNPDA1
	CREB1	SNHG8
	EGR1	TMEM170B
	FOSL2	TMEM170B
	NR3C1	TMEM170B
	GTF2I	TMEM170B
	HOXA9	TMEM170B
	LMO2	TMEM170B
	MAZ	TMEM170B
	MEIS1	TMEM170B
	NFYA	TMEM170B
	RREB1	TMEM170B
	E2F5	TMPO-AS1
	FOXO3	TMPO-AS1
	MEF2A	TMPO-AS1
	MEF2C	TMPO-AS1
	KMT2A	TMPO-AS1
	NCOR1	TMPO-AS1
	KMT2A	ZNF730
	EBF1	HDAC6
	PATZ1	HDAC6
	ARNT	HDAC5
	MAZ	HDAC5
	MEF2A	HDAC5
	MEF2C	HDAC5
	MYC	HDAC5
	RREB1	HDAC5
	RUNX2	HDAC5
	RUNX1	HDAC5
	ELF1	PDCD6
	NFYA	PDCD6
	MAZ	BCL2L11
	KMT2A	BCL2L11
	NFYA	BCL2L11
	EGR1	SH2B3
	IKZF2	SH2B3
	GTF2A1	SH2B3
	GTF2I	SH2B3
	MAZ	SH2B3
	MEF2A	SH2B3
	MEF2C	SH2B3
	KMT2A	SH2B3
	NFIL3	SH2B3
	PAX5	SH2B3
	TEF	SH2B3
	MEF2A	FRAT1
	MEF2C	FRAT1
	KMT2A	FRAT1
	RREB1	FRAT1
	MYC	TROAP
	NFYA	TROAP
	KMT2A	MIR1296
	KMT2A	MIR1204
	KMT2A	FTX
	IKZF1	TOM1
	IKZF2	TOM1
	HOXA9	TOM1
	RBPJ	TOM1
	ARNT	TOM1
	MEIS1	TOM1
	MYC	TOM1
	REL	TOM1
	ZNF143	TOM1
	CLOCK	TOM1
	MYC	SH2D3A
	ELF1	RANBP9
	UHRF1	RANBP9
	KMT2A	RANBP9
	IKZF1	MIR548Z
	KMT2A	MIR548Z
	PAX6	MIR548Z
	KMT2A	MIR3679
	KMT2A	RUNX1
	KMT2A	TRG-AS1
	KMT2A	SENCR
	IKZF1	SMC4
	E2F5	SMC4
	ELF1	SMC4
	IKZF2	SMC4
	HOXA9	SMC4
	RBPJ	SMC4
	IRF1	SMC4
	IRF2	SMC4
	ARNT	SMC4
	MEF2A	SMC4
	MEF2C	SMC4
	MEIS1	SMC4
	KMT2A	SMC4
	MYC	SMC4
	ZNF143	SMC4
	ARID5B	SMC4
	NCOR1	SMC4
	KMT2A	GJC1
	KMT2A	KLRK1
	EGR1	SAE1
	GTF2I	SAE1
	LMO2	SAE1
	ARNT	SAE1
	KMT2A	SAE1
	MYC	SAE1
	CLOCK	SAE1
	RBPJ	ABCC5
	MYC	ABCC5
	FOXP1	ABCB6
	LMO2	ABCB6
	STAT1	ABCB6
	ELF1	SCAMP3
	ARNT	SCAMP3
	MYC	SCAMP3
	NFYA	SCAMP3
	STAT1	IL18BP
	ELF1	TSPAN32
	MAZ	TSPAN32
	NFYA	TSPAN32
	EGR1	ATP9A
	ARNT	ATP9A
	MYC	ATP9A
	HOXA9	PDCD7
	MEIS1	PDCD7
	ZNF143	PDCD7
	KMT2A	GPC6
	MYC	GPC6
	HBP1	EDIL3
	HMGB2	EDIL3
	ARNT	EDIL3
	MAZ	EDIL3
	PAX5	EDIL3
	GTF2I	UST
	MAZ	UST
	KMT2A	UST
	MYC	UST
	REL	UST
	EGR1	ACTR3
	ELF1	ACTR3
	KMT2A	ACTR3
	MIR101-1	TSPAN5
	MIR16-2	TSPAN5
	KMT2A	PPIF
	NFYA	PPIF
	IKZF2	KIF20A
	HBP1	KIF20A
	HMGB2	KIF20A
	KMT2A	KIF20A
	NFYA	KIF20A
	LEF1	KIF20A
	EGR1	HIPK3
	ELF1	HIPK3
	FOSL2	HIPK3
	HBP1	HIPK3
	GTF2I	HIPK3
	HMGB2	HIPK3
	ARNT	HIPK3
	MAZ	HIPK3
	KMT2A	HIPK3
	NFYA	HIPK3
	RREB1	HIPK3
	STAT1	HIPK3
	ZNF143	HIPK3
	PTTG1	HIPK3
	ELF1	FEM1B
	FOSL2	FEM1B
	GTF2I	FEM1B
	MAZ	FEM1B
	KMT2A	FEM1B
	ARNT	ACTR1A
	ZNF143	ACTR1A
	ARID5B	ACTR1A
	RUNX2	ACTR1A
	RUNX1	ACTR1A
	MIR101-1	ARL4C
	ELF1	ZNF263
	ATF4	ZNF263
	NFYA	ZNF263
	MAZ	TRAP1
	ATF4	TRAP1
	RREB1	TRAP1
	FOXP1	OPTN
	MYC	OPTN
	FOSL2	NAMPT
	LMO2	NAMPT
	ARNT	NAMPT
	MAZ	NAMPT
	KMT2A	NAMPT
	MYC	NAMPT
	NFYA	NAMPT
	STAT1	NAMPT
	MYC	TOB1
	IKZF1	PLXNC1
	ELF1	PLXNC1
	FOXO3	PLXNC1
	HBP1	PLXNC1
	GTF2I	PLXNC1
	HMGB2	PLXNC1
	HOXA9	PLXNC1
	IRF1	PLXNC1
	IRF2	PLXNC1
	ARNT	PLXNC1
	MAZ	PLXNC1
	MEIS1	PLXNC1
	KMT2A	PLXNC1
	ZNF143	PLXNC1
	MAZ	FARP1
	IRX5	LPAR6
	ZHX3	LPAR6
	FOXO3	LPAR6
	MEF2A	LPAR6
	MEF2C	LPAR6
	KMT2A	LPAR6
	ELF1	ZNF256
	NFYA	ZNF256
	ZNF143	ZNF256
	KMT2A	CNIH1
	STAT1	CNIH1
	ZNF143	CNIH1
	PTTG1	CNIH1
	KMT2A	STAG3L5P-PVRIG2P-PILRB
	KMT2A	ANKRD44-IT1
	KMT2A	LAMP5-AS1
	KMT2A	LINC01585
	IRX5	TSHZ1
	ELF1	TSHZ1
	IKZF2	TSHZ1
	ZHX3	TSHZ1
	FOXO3	TSHZ1
	FLI1	TSHZ1
	FOSL2	TSHZ1
	HBP1	TSHZ1
	NR3C1	TSHZ1
	GTF2I	TSHZ1
	HMGB2	TSHZ1
	HOXA9	TSHZ1
	RBPJ	TSHZ1
	IRF1	TSHZ1
	IRF2	TSHZ1
	ARNT	TSHZ1
	MIR21	TSHZ1
	MAZ	TSHZ1
	MEF2A	TSHZ1
	MEF2C	TSHZ1
	MEIS1	TSHZ1
	KMT2A	TSHZ1
	NFIL3	TSHZ1
	PAX5	TSHZ1
	LEF1	TSHZ1
	BACH2	TSHZ1
	RREB1	TSHZ1
	TEF	TSHZ1
	ARID5B	TSHZ1
	CLOCK	TSHZ1
	NCOR1	TSHZ1
	KMT2A	MPHOSPH9
	MYC	MPHOSPH9
	E2F5	ADAM10
	EGR1	ADAM10
	ELF1	ADAM10
	IKZF2	ADAM10
	HBP1	ADAM10
	GTF2I	ADAM10
	HMGB2	ADAM10
	ARNT	ADAM10
	MAZ	ADAM10
	KMT2A	ADAM10
	MYC	ADAM10
	ATF4	ADAM10
	PAX5	ADAM10
	REL	ADAM10
	RREB1	ADAM10
	ZNF143	ADAM10
	CLOCK	ADAM10
	MAZ	EIF1
	NFYA	EIF1
	STAT1	EIF1
	IRX5	CDK6
	ELF1	CDK6
	ZHX3	CDK6
	HBP1	CDK6
	HMGB2	CDK6
	LMO2	CDK6
	MIR21	CDK6
	MAZ	CDK6
	KMT2A	CDK6
	NFIL3	CDK6
	STAT1	CDK6
	ELF1	PSMD14
	FOSL2	PSMD14
	KMT2A	PSMD14
	NFYA	PSMD14
	BACH2	PSMD14
	ELF1	CTDSPL
	MYC	CTDSPL
	FOXP1	GDF11
	LMO2	GDF11
	KMT2A	GDF11
	STAT1	GDF11
	IKZF1	TRIB1
	IKZF2	TRIB1
	UHRF1	TRIB1
	ARNT	TRIB1
	MAZ	TRIB1
	STAT1	TRIB1
	RUNX1	TRIB1
	CLOCK	TRIB1
	ELF1	CD96
	KMT2A	CD96
	EGR1	PLIN3
	NFYA	PLIN3
	MAZ	MFSD10
	KMT2A	MFSD10
	RREB1	MFSD10
	ARNT	STX6
	MYC	STX6
	NFYA	STX6
	CLOCK	STX6
	ELF1	RASGRP2
	IKZF2	RASGRP2
	LMO2	RASGRP2
	MAZ	RASGRP2
	MYC	RASGRP2
	ELF1	CALCOCO2
	MAZ	CALCOCO2
	MEF2A	CALCOCO2
	MEF2C	CALCOCO2
	LEF1	CALCOCO2
	ZNF143	CALCOCO2
	RUNX1	CALCOCO2
	MYC	KCNMB2
	IKZF1	GPHN
	EGR1	GPHN
	GTF2I	GPHN
	MAZ	GPHN
	KMT2A	GPHN
	MYC	GPHN
	NFYA	GPHN
	STAT1	GPHN
	PTTG1	GPHN
	KMT2A	MIR6774
	MAZ	POP7
	IRX5	SPRY2
	IKZF1	SPRY2
	E2F5	SPRY2
	EGR1	SPRY2
	ELF1	SPRY2
	IKZF2	SPRY2
	ZHX3	SPRY2
	FOXO3	SPRY2
	FOSL2	SPRY2
	NR3C1	SPRY2
	GTF2I	SPRY2
	RBPJ	SPRY2
	IRF1	SPRY2
	IRF2	SPRY2
	LMO2	SPRY2
	ARNT	SPRY2
	MIR21	SPRY2
	MAZ	SPRY2
	KMT2A	SPRY2
	MYC	SPRY2
	ATF4	SPRY2
	NFYA	SPRY2
	PAX5	SPRY2
	BACH2	SPRY2
	RREB1	SPRY2
	RUNX2	SPRY2
	RUNX1	SPRY2
	CLOCK	SPRY2
	EGR1	STAM2
	ELF1	STAM2
	KMT2A	STAM2
	STAT1	STAM2
	EGR1	CDKN1A
	KMT2A	CDKN1A
	MYC	CDKN1A
	NFYA	CDKN1A
	RUNX2	CDKN1A
	RUNX1	CDKN1A
	KMT2A	IRX5
	RUNX1	CDKN1B
	EGR1	FSTL3
	MYC	FSTL3
	ELF1	NET1
	NR3C1	NET1
	ARNT	NET1
	MAZ	NET1
	MYC	NET1
	NFYA	NET1
	RUNX1	NET1
	CLOCK	NET1
	GTF2I	UBE4B
	ARNT	UBE4B
	MAZ	UBE4B
	MYC	UBE4B
	NFYA	UBE4B
	CLOCK	UBE4B
	ELF1	SIGMAR1
	MYC	SIGMAR1
	NFYA	SIGMAR1
	IRX5	CWC27
	ELF1	CWC27
	ZHX3	CWC27
	FOXO3	CWC27
	IRF1	CWC27
	IRF2	CWC27
	RREB1	CWC27
	ARID5B	CWC27
	NCOR1	CWC27
	KMT2A	CDKN2A
	MYC	CDKN2A
	EGR1	BCKDK
	ATF4	BCKDK
	PAX5	BCKDK
	MIR21	2006-03-01
	MAZ	2006-03-01
	KMT2A	2006-03-01
	IRX5	CDKN2C
	IKZF1	CDKN2C
	EGR1	CDKN2C
	ELF1	CDKN2C
	IKZF2	CDKN2C
	ZHX3	CDKN2C
	FOXO3	CDKN2C
	GTF2I	CDKN2C
	HOXA9	CDKN2C
	RBPJ	CDKN2C
	ARNT	CDKN2C
	MAZ	CDKN2C
	MEIS1	CDKN2C
	KMT2A	CDKN2C
	MYC	CDKN2C
	STAT1	CDKN2C
	RUNX1	CDKN2C
	PTTG1	CDKN2C
	NCOR1	CDKN2C
	ELF1	CDKN2D
	FOXO3	CDKN2D
	HBP1	CDKN2D
	GTF2I	CDKN2D
	HMGB2	CDKN2D
	RBPJ	CDKN2D
	MAZ	CDKN2D
	MYC	CDKN2D
	NFYA	CDKN2D
	RREB1	CDKN2D
	RUNX2	CDKN2D
	RUNX1	CDKN2D
	ELF1	IKZF1
	LMO2	IKZF1
	KMT2A	IKZF1
	RUNX1	IKZF1
	PTTG1	IKZF1
	ELF1	RRAGB
	RBPJ	RRAGB
	ARNT	RRAGB
	MYC	RRAGB
	CLOCK	RRAGB
	ELF1	AKR1A1
	KMT2A	AKR1A1
	MAZ	CDKN3
	KMT2A	CDKN3
	NFYA	CDKN3
	MYB	TLR6
	STAT1	MRVI1
	KMT2A	TRIM22
	GTF2A1	ABCA7
	MYC	ABCA7
	NFYA	ABCA7
	LMO2	WARS2
	MYC	WARS2
	CLOCK	WARS2
	ELF1	HMG20A
	IKZF2	HMG20A
	FOSL2	HMG20A
	ARNT	HMG20A
	MYC	HMG20A
	ATF4	HMG20A
	NFIL3	HMG20A
	ZNF143	HMG20A
	RUNX1	HMG20A
	KMT2A	CITED2
	CLOCK	CITED2
	FLI1	SEMA3A
	HOXA9	SEMA3A
	KMT2A	SEMA3A
	MYC	SEMA3A
	STAT1	SEMA3A
	RUNX1	SEMA3A
	PTTG1	SEMA3A
	MAZ	TUBA1B
	KMT2A	TUBA1B
	NFIL3	TUBA1B
	PAX5	TUBA1B
	IRX5	TUBB4B
	ZHX3	TUBB4B
	HBP1	TUBB4B
	HMGB2	TUBB4B
	MAZ	TUBB4B
	NFYA	TUBB4B
	PAX5	TUBB4B
	LEF1	TUBB4B
	MAZ	CDR2
	MYC	CDR2
	NFYA	CDR2
	LEF1	CDR2
	MIR548Z	DLC1
	MIR101-1	DLC1
	MIR200C	DLC1
	KMT2A	ATP8A1
	MYC	ATP8A1
	KMT2A	NDRG1
	MAZ	ADARB1
	MYC	ADARB1
	NFYA	ADARB1
	EGR1	NDC80
	ELF1	NDC80
	IKZF2	NDC80
	FOXP1	NDC80
	UHRF1	CPQ
	CLOCK	CPQ
	MIR21	YAP1
	NFYA	PRMT5
	ZNF143	PRMT5
	ELF1	CD2BP2
	ATF4	CD2BP2
	LMO2	IFI30
	MYC	IFI30
	EGR1	ACAA2
	MAZ	ACAA2
	KMT2A	ACAA2
	MIR16-2	CDX2
	EGR1	VAV3
	MYC	VAV3
	KMT2A	ECI2
	ELF1	HAX1
	RBPJ	HAX1
	MAZ	HAX1
	LEF1	HAX1
	CREB1	MAD2L2
	JUN	MAD2L2
	JUND	MAD2L2
	NFYA	TACC3
	STAT1	TACC3
	MAZ	MERTK
	ELF1	SLC30A9
	ATF4	SLC30A9
	ZNF143	SLC30A9
	E2F5	PIBF1
	ELF1	PIBF1
	NFYA	PIBF1
	RREB1	PIBF1
	ZNF143	PIBF1
	IKZF1	TIMM44
	NFYA	TIMM44
	E2F5	SEC23B
	ELF1	SEC23B
	HOXA9	SEC23B
	NFYA	SEC23B
	REL	SEC23B
	RUNX1	SEC23B
	IKZF1	CAP1
	ELF1	CAP1
	IKZF2	CAP1
	FOXO3	CAP1
	HBP1	CAP1
	NR3C1	CAP1
	HMGB2	CAP1
	MAZ	CAP1
	MEF2A	CAP1
	MEF2C	CAP1
	TEF	CAP1
	ZNF143	CAP1
	EGR1	CRTAP
	MAZ	CRTAP
	KMT2A	CRTAP
	MYC	CRTAP
	STAT1	CRTAP
	PTTG1	CRTAP
	LMO2	VAT1
	MAZ	VAT1
	STAT1	VAT1
	NR3C1	UNC13B
	MYC	UNC13B
	NFYA	UNC13B
	LMO2	CEBPA
	ARNT	CEBPA
	KMT2A	CEBPA
	MYC	CEBPA
	RREB1	CEBPA
	NFE2L1	SEMA4F
	MYC	SEMA4D
	ELF1	SEMA4B
	LMO2	SEMA4B
	MAZ	SEMA4B
	CLOCK	SEMA4B
	FOSL2	CEBPB
	MAZ	CEBPB
	MEF2A	CEBPB
	MEF2C	CEBPB
	MYC	CEBPB
	ATF4	CEBPB
	BACH2	CEBPB
	RBPJ	CIB1
	LMO2	CIB1
	MAZ	CIB1
	KMT2A	CIB1
	CLOCK	CIB1
	E2F5	HYOU1
	EGR1	HYOU1
	ELF1	HYOU1
	GTF2I	HYOU1
	MAZ	HYOU1
	MYC	HYOU1
	NFYA	HYOU1
	RREB1	HYOU1
	KMT2A	NOP56
	NFYA	NOP56
	E2F5	PITRM1
	NFYA	PITRM1
	ELF1	ATG7
	E2F5	RNASEH2A
	NFYA	RNASEH2A
	ZNF143	RNASEH2A
	ARID5B	RNASEH2A
	RUNX2	RNASEH2A
	RUNX1	RNASEH2A
	EGR1	GLRX3
	MYC	GLRX3
	REL	GLRX3
	IKZF1	CEBPG
	MAZ	CEBPG
	NFIL3	CEBPG
	NFYA	CEBPG
	E2F5	ANP32B
	IKZF2	ANP32B
	RBPJ	ANP32B
	IRF1	ANP32B
	IRF2	ANP32B
	MAZ	ANP32B
	KMT2A	ANP32B
	MYC	ANP32B
	NFIL3	ANP32B
	PAX5	ANP32B
	REL	ANP32B
	ELF1	ARL6IP5
	IKZF2	ARL6IP5
	NR3C1	ARL6IP5
	KMT2A	ARL6IP5
	NFYA	ARL6IP5
	RUNX2	ARL6IP5
	RUNX1	ARL6IP5
	EGR1	ARPC1A
	ELF1	ARPC1A
	GTF2I	ARPC1A
	MAZ	ARPC1A
	ELF1	AGPAT1
	UHRF1	AGPAT1
	GTF2I	AGPAT1
	LMO2	AGPAT1
	MAZ	AGPAT1
	NFYA	AGPAT1
	PTTG1	AGPAT1
	ELF1	AGPAT2
	LMO2	AGPAT2
	MAZ	AGPAT2
	MYC	AGPAT2
	ATF4	AGPAT2
	NFYA	AGPAT2
	BACH2	AGPAT2
	STAT1	AGPAT2
	ZNF143	AGPAT2
	PTTG1	AGPAT2
	ZNF143	RPP30
	KMT2A	SLC19A2
	ELF1	ARFGEF2
	GTF2I	ARFGEF2
	ARNT	ARFGEF2
	MYC	ARFGEF2
	CLOCK	ARFGEF2
	UHRF1	CCT7
	LMO2	CCT7
	NFYA	CCT7
	STAT1	CCT7
	RUNX2	CCT7
	RUNX1	CCT7
	PTTG1	CCT7
	MAZ	NPC2
	NFYA	NPC2
	ARID5B	NPC2
	RUNX2	TACC2
	RUNX1	TACC2
	NFYA	CENPA
	MIR548Z	SORBS1
	E2F5	SMC2
	ELF1	SMC2
	IRF1	SMC2
	IRF2	SMC2
	MAZ	SMC2
	KMT2A	SMC2
	LEF1	SMC2
	EGR1	CDC42EP3
	ELF1	CDC42EP3
	IKZF2	CDC42EP3
	LMO2	CDC42EP3
	MAZ	CDC42EP3
	KMT2A	CDC42EP3
	NFYA	CDC42EP3
	NCOR1	CDC42EP3
	PAX5	SH2B2
	UHRF1	PAICS
	ARNT	PAICS
	MAZ	PAICS
	KMT2A	PAICS
	MYC	PAICS
	CLOCK	PAICS
	IRX5	MXD4
	EGR1	MXD4
	ZHX3	MXD4
	FOSL2	MXD4
	HBP1	MXD4
	FOXP1	MXD4
	NR3C1	MXD4
	GTF2I	MXD4
	HMGB2	MXD4
	HOXA9	MXD4
	LMO2	MXD4
	ARNT	MXD4
	MAZ	MXD4
	MEIS1	MXD4
	MYC	MXD4
	NFIL3	MXD4
	NFYA	MXD4
	BACH2	MXD4
	TEF	MXD4
	RUNX1	MXD4
	PIAS2	MXD4
	CLOCK	MXD4
	EGR1	HEXIM1
	ELF1	HEXIM1
	GTF2I	HEXIM1
	MAZ	HEXIM1
	MEF2A	HEXIM1
	MEF2C	HEXIM1
	KMT2A	HEXIM1
	NFYA	HEXIM1
	RUNX1	HEXIM1
	MAZ	SPAG5
	ELF1	ARID3B
	MYC	ARID3B
	ELF1	CENPF
	ARNT	CENPF
	KMT2A	CENPF
	MYC	CENPF
	NFYA	CENPF
	CLOCK	CENPF
	IKZF1	NPRL2
	ELF1	NPRL2
	ELF1	IGF2BP3
	KMT2A	IGF2BP3
	IKZF1	CELF1
	ELF1	CELF1
	IKZF2	CELF1
	GTF2I	CELF1
	IRF1	CELF1
	IRF2	CELF1
	LMO2	CELF1
	MAZ	CELF1
	MEF2A	CELF1
	MEF2C	CELF1
	KMT2A	CELF1
	NFYA	CELF1
	RREB1	CELF1
	STAT1	CELF1
	PTTG1	CELF1
	EGR1	CELF2
	ELF1	CELF2
	IKZF2	CELF2
	NR3C1	CELF2
	UHRF1	CELF2
	GTF2I	CELF2
	LMO2	CELF2
	KMT2A	CELF2
	NFYA	CELF2
	BACH2	CELF2
	STAT1	CELF2
	RUNX1	CELF2
	PTTG1	CELF2
	E2F5	CTCF
	EGR1	CTCF
	FOSL2	CTCF
	GTF2I	CTCF
	ARNT	CTCF
	MAZ	CTCF
	KMT2A	CTCF
	ATF4	CTCF
	RREB1	CTCF
	ZNF143	CTCF
	MEF2A	CD226
	MEF2C	CD226
	CTCF	DCTN6
	EGR1	B3GNT2
	LMO2	B3GNT2
	KMT2A	B3GNT2
	NFYA	B3GNT2
	STAT1	B3GNT2
	RUNX1	B3GNT2
	PTTG1	B3GNT2
	LMO2	GNB5
	ARNT	EBP
	NFYA	EBP
	KMT2A	CCT8
	ZNF143	CCT8
	NFYA	CETN3
	ZNF143	CETN3
	MAZ	FAM189B
	ZNF143	FAM189B
	E2F5	POLD3
	KMT2A	POLD3
	KMT2A	AP4B1
	MYC	SLC12A7
	ELF1	MGEA5
	MAZ	MGEA5
	KMT2A	MGEA5
	MYC	MGEA5
	EGR1	NFAT5
	ELF1	NFAT5
	FOXP1	NFAT5
	UHRF1	NFAT5
	LMO2	NFAT5
	MIR21	NFAT5
	MAZ	NFAT5
	NFYA	NFAT5
	RUNX1	NFAT5
	ELF1	PLK4
	FOSL2	PLK4
	KMT2A	PLK4
	ATF4	PLK4
	NFIL3	PLK4
	ELF1	PHTF1
	IRF1	PHTF1
	IRF2	PHTF1
	KMT2A	PHTF1
	ELF1	CTSC
	MEF2A	CTSC
	MEF2C	CTSC
	KMT2A	CTSC
	MYC	CTSC
	UHRF1	NUP50
	LMO2	NUP50
	NFYA	NUP50
	STAT1	NUP50
	PTTG1	NUP50
	EGR1	KDM5B
	ELF1	KDM5B
	IKZF2	KDM5B
	NR3C1	KDM5B
	IRF1	KDM5B
	IRF2	KDM5B
	MAZ	KDM5B
	RREB1	KDM5B
	IKZF2	TOB2
	NR3C1	TOB2
	IRF1	TOB2
	IRF2	TOB2
	ARNT	TOB2
	MAZ	TOB2
	KMT2A	TOB2
	ATF4	TOB2
	STAT1	TOB2
	ZNF143	TOB2
	FOXP1	HBS1L
	UHRF1	HBS1L
	RBPJ	HBS1L
	LMO2	HBS1L
	MAZ	HBS1L
	MYC	HBS1L
	NFYA	HBS1L
	RUNX1	HBS1L
	MIR548Z	PLK2
	MIR200C	PLK2
	ELF1	ZBTB6
	KMT2A	ARPP21
	RUNX1	ARPP21
	E2F5	ZNF274
	ELF1	ZNF274
	UHRF1	ZNF274
	LMO2	ZNF274
	MYC	ZNF274
	NFYA	ZNF274
	ZNF143	ZNF274
	RUNX1	ZNF274
	PTTG1	ZNF274
	EGR1	NEK6
	ARNT	NEK6
	MAZ	NEK6
	KMT2A	NEK6
	STAT1	NEK6
	KMT2A	MTHFD2
	NFYA	MTHFD2
	STAT1	MTHFD2
	FOXP1	CYSLTR1
	RUNX1	CYSLTR1
	ELF1	SDCCAG8
	ZNF143	SDCCAG8
	RUNX1	SDCCAG8
	ELF1	SDCCAG3
	MAZ	SDCCAG3
	MYC	SDCCAG3
	RUNX2	SDCCAG3
	RUNX1	SDCCAG3
	NFYA	PPP1R13L
	RUNX1	PPP1R13L
	MYC	CD3EAP
	MYC	ADAM28
	IKZF1	ARID5A
	MAZ	ARID5A
	KMT2A	ARID5A
	NFYA	ARID5A
	ZNF143	ARID5A
	RUNX1	ARID5A
	ELF1	USP20
	MYC	USP20
	ELF1	WDR3
	ARNT	WDR3
	NFYA	WDR3
	STAT1	WDR3
	MYC	GPR83
	ELF1	RAB10
	ARNT	RAB10
	MAZ	RAB10
	KMT2A	RAB10
	NFIL3	RAB10
	RUNX1	PPARGC1A
	EGR1	MALT1
	ELF1	MALT1
	FOXP1	MALT1
	MYC	MALT1
	STAT1	MALT1
	PTTG1	MALT1
	EGR1	ADCY3
	MAZ	ADCY3
	MYC	ADCY3
	REL	ADCY3
	ELF1	BLCAP
	NR3C1	BLCAP
	LMO2	BLCAP
	MYC	BLCAP
	REL	BLCAP
	ARID5B	BLCAP
	RUNX2	BLCAP
	RUNX1	BLCAP
	CLOCK	BLCAP
	MEF2A	TRAFD1
	MEF2C	TRAFD1
	KMT2A	TRAFD1
	NFYA	TRAFD1
	TEF	TRAFD1
	EGR1	RNPS1
	ELF1	RNPS1
	UHRF1	RNPS1
	LMO2	RNPS1
	MYC	RNPS1
	NFIL3	RNPS1
	NFYA	RNPS1
	STAT1	RNPS1
	RUNX2	RNPS1
	RUNX1	RNPS1
	PTTG1	RNPS1
	KMT2A	DBF4
	ARNT	SPIN1
	MIR21	SPIN1
	MAZ	SPIN1
	KMT2A	SPIN1
	PAX5	SPIN1
	CLOCK	SPIN1
	MYC	EHD1
	NFYA	EHD1
	ELF1	BTG3
	MAZ	BTG3
	KMT2A	BTG3
	ELF1	SERINC3
	NFYA	SERINC3
	KMT2A	ERP29
	PAX5	ERP29
	KMT2A	MLLT11
	MIR16-2	RAB40B
	BCL6	RAB40B
	EGR1	TMED10
	ELF1	TMED10
	FOXO3	TMED10
	NR3C1	TMED10
	ARNT	TMED10
	MEF2A	TMED10
	MEF2C	TMED10
	MYC	TMED10
	STAT1	TMED10
	TEF	TMED10
	PTTG1	TMED10
	CLOCK	TMED10
	ELF1	CLP1
	HBP1	CLP1
	HMGB2	CLP1
	MAZ	CLP1
	ATF4	CLP1
	ZNF143	CLP1
	ELF1	FERMT2
	IKZF2	FERMT2
	FLI1	FERMT2
	GTF2A1	FERMT2
	GTF2I	FERMT2
	MAZ	FERMT2
	MEF2A	FERMT2
	MEF2C	FERMT2
	KMT2A	FERMT2
	NFIL3	FERMT2
	LEF1	FERMT2
	TEF	FERMT2
	ELF1	MAPRE2
	HBP1	MAPRE2
	HMGB2	MAPRE2
	ARNT	MAPRE2
	MAZ	MAPRE2
	KMT2A	MAPRE2
	MYC	MAPRE2
	ELF1	SLC27A3
	ARNT	SLC27A3
	KMT2A	SLC27A3
	KMT2A	SLC27A2
	MYC	SLC27A2
	IKZF1	KIF2C
	ELF1	KIF2C
	MAZ	KIF2C
	PAX5	KIF2C
	ZNF143	KIF2C
	ELF1	LILRB4
	MAZ	LILRB4
	MYC	LILRB4
	RBPJ	CCDC85B
	MAZ	CCDC85B
	NFYA	CCDC85B
	FOXP1	GLIPR1
	UHRF1	GLIPR1
	STAT1	GLIPR1
	RUNX1	GLIPR1
	EGR1	RCBTB2
	GTF2I	RCBTB2
	KMT2A	RCBTB2
	ELF1	LILRA2
	UHRF1	RAB31
	MIR548Z	STON1
	MIR101-1	STON1
	MIR200C	STON1
	IKZF1	RCC1
	IKZF2	RCC1
	FOXO3	RCC1
	KMT2A	RCC1
	IKZF1	PIM2
	FOXO3	PIM2
	LMO2	PIM2
	ARNT	PIM2
	MAZ	PIM2
	NFYA	PIM2
	LEF1	PIM2
	RREB1	PIM2
	STAT1	PIM2
	ZNF143	PIM2
	EGR1	B4GAT1
	MAZ	B4GAT1
	MYC	B4GAT1
	NFYA	B4GAT1
	EGR1	MID2
	GTF2I	MID2
	RREB1	MID2
	KMT2A	PAPD7
	MYC	PAPD7
	EGR1	ADRM1
	ELF1	ADRM1
	HBP1	ADRM1
	HMGB2	ADRM1
	HOXA9	ADRM1
	LMO2	ADRM1
	MAZ	ADRM1
	MEIS1	ADRM1
	MYC	ADRM1
	NFYA	ADRM1
	BACH2	ADRM1
	KMT2A	DDX52
	MYC	UBE2C
	NFYA	UBE2C
	CLOCK	UBE2C
	NFYA	C10orf10
	STAT1	C10orf10
	MYC	RAPGEF4
	IKZF2	CHD3
	FOXO3	CHD3
	RREB1	CHD3
	ZNF143	CHD3
	ARNT	DUSP14
	KMT2A	DUSP14
	STAT1	DUSP14
	E2F5	DIDO1
	ELF1	DIDO1
	FOSL2	DIDO1
	KMT2A	DIDO1
	NFYA	DIDO1
	LMO2	WDR5
	MAZ	WDR5
	NFYA	WDR5
	STAT1	WDR5
	PTTG1	WDR5
	RUNX1	PRDM5
	NFYA	CIT
	ELF1	EMILIN1
	RUNX1	EMILIN1
	IRX5	FOXN3
	E2F5	FOXN3
	ZHX3	FOXN3
	FOXO3	FOXN3
	HBP1	FOXN3
	HMGB2	FOXN3
	LMO2	FOXN3
	MAZ	FOXN3
	MEF2A	FOXN3
	MEF2C	FOXN3
	PATZ1	RCAN3
	ZNF143	KPTN
	ELF1	TBC1D8
	GTF2I	TBC1D8
	KMT2A	TBC1D8
	IRX5	KAT7
	ELF1	KAT7
	ZHX3	KAT7
	NFYA	KAT7
	KMT2A	GLMN
	ARNT	BVES
	MIR21	BVES
	MEF2A	BVES
	MEF2C	BVES
	ARID5B	BVES
	YY1	AP4S1
	KMT2A	LDB3
	MAZ	ERLIN2
	ATF4	ERLIN2
	NFYA	ERLIN2
	STAT1	ERLIN2
	RUNX1	ERLIN2
	PTTG1	ERLIN2
	NCOR1	ERLIN2
	KMT2A	NUDT4
	MYC	FSTL1
	EGR1	PSIP1
	LMO2	PSIP1
	ARNT	PSIP1
	MAZ	PSIP1
	KMT2A	PSIP1
	ARID5B	PSIP1
	RUNX1	PSIP1
	CLOCK	PSIP1
	KMT2A	ADAMTS6
	MYC	ADAMTS6
	EGR1	BAZ2A
	ELF1	BAZ2A
	GTF2I	BAZ2A
	MAZ	BAZ2A
	RREB1	BAZ2A
	STAT1	BAZ2A
	IRX5	WDR6
	ZHX3	WDR6
	NFYA	WDR6
	EGR1	RASSF1
	FOXP1	RASSF1
	UHRF1	RASSF1
	LMO2	RASSF1
	ARNT	RASSF1
	KMT2A	RASSF1
	NFYA	RASSF1
	PAX5	RASSF1
	STAT1	RASSF1
	RUNX1	RASSF1
	PTTG1	RASSF1
	NFYA	ADCY6
	STAT1	ADCY6
	E2F5	CHEK2
	MAZ	CHEK2
	NFYA	CHEK2
	BACH2	CHEK2
	RREB1	CHEK2
	ZNF143	CHEK2
	CLOCK	CHEK2
	RUNX1	POLI
	ELF1	CHM
	MYC	CHM
	ZNF143	CHM
	KMT2A	IRAK3
	ATF4	IRAK3
	LMO2	GALNT6
	MAZ	GALNT6
	RUNX1	GALNT6
	HBP1	RASSF8
	GTF2A1	RASSF8
	HMGB2	RASSF8
	RBPJ	RASSF8
	ZNF143	RASSF8
	RUNX2	RASSF8
	RUNX1	RASSF8
	ELF1	RNF139
	MAZ	RNF139
	KMT2A	RNF139
	EGR1	RNF24
	ELF1	RNF24
	MAZ	RNF24
	IRX5	PMF1
	E2F5	PMF1
	ZHX3	PMF1
	NFYA	PMF1
	TEF	PMF1
	RUNX2	PMF1
	RUNX1	PMF1
	KMT2A	PACSIN2
	CREB1	MAN1B1
	JUN	MAN1B1
	JUND	MAN1B1
	MAZ	SNX18
	KMT2A	SNX18
	FOSL2	FILIP1L
	HBP1	FILIP1L
	FOXP1	FILIP1L
	GTF2A1	FILIP1L
	HMGB2	FILIP1L
	LMO2	FILIP1L
	KMT2A	FILIP1L
	ATF4	FILIP1L
	NFIL3	FILIP1L
	KMT2A	MIR4435-2HG
	KMT2A	XPOT
	EGR1	CHP1
	ELF1	CHP1
	FOSL2	CHP1
	GTF2I	CHP1
	MAZ	CHP1
	KMT2A	CHP1
	MYC	CHP1
	NFYA	CHP1
	LMO2	CMTM7
	ARNT	CMTM7
	KMT2A	CMTM7
	MYC	CMTM7
	CLOCK	CMTM7
	EGR1	DDX19B
	ELF1	DDX19B
	KMT2A	DDX19B
	ATF4	DDX19B
	STAT1	DDX19B
	PTTG1	DDX19B
	MYC	NRM
	NFYA	NRM
	RUNX1	NRM
	ELF1	IFT43
	ELF1	SYNRG
	UHRF1	SYNRG
	LMO2	SYNRG
	ARNT	SYNRG
	MAZ	SYNRG
	MYC	SYNRG
	STAT1	SYNRG
	RUNX1	SYNRG
	PTTG1	SYNRG
	CLOCK	SYNRG
	LMO2	WDR89
	NFYA	WDR89
	STAT1	WDR89
	PTTG1	WDR89
	ELF1	VPS26B
	ELF1	CFAP36
	KMT2A	ADCY7
	ELF1	LYST
	MAZ	LYST
	NFYA	LYST
	REL	LYST
	STAT1	LYST
	PTTG1	LYST
	ELF1	CDCA5
	FLI1	CD300A
	FOXP1	CD300A
	NFYA	CD300A
	STAT1	CD300A
	RUNX2	CD300A
	RUNX1	CD300A
	MYC	SCAMP4
	RUNX1	SCAMP4
	KMT2A	MGAT4A
	MYC	MGAT4A
	NFYA	MGAT4A
	ELF1	CASC4
	LMO2	CASC4
	MAZ	CASC4
	KMT2A	CASC4
	NFYA	CASC4
	ELF1	C12orf57
	HBP1	C12orf57
	HMGB2	C12orf57
	HOXA9	C12orf57
	MEIS1	C12orf57
	KMT2A	C12orf57
	GTF2I	GLCCI1
	MIR21	GLCCI1
	MAZ	GLCCI1
	MYC	GLCCI1
	NFYA	GLCCI1
	RUNX2	GLCCI1
	RUNX1	GLCCI1
	TEF	TMEM106A
	IRX5	STK38
	ELF1	STK38
	IKZF2	STK38
	ZHX3	STK38
	FOXO3	STK38
	MAZ	STK38
	KMT2A	STK38
	EGR1	CBX3
	MAZ	CBX3
	IKZF1	GABARAP
	ELF1	GABARAP
	MAZ	GABARAP
	PAX5	GABARAP
	RREB1	GABARAP
	EGR1	MGLL
	FOXP1	MGLL
	ELF1	HELQ
	KMT2A	HELQ
	MYC	HELQ
	NFYA	HELQ
	MIR548Z	CYP2U1
	KMT2A	SLC2A13
	NR3C1	LACTB
	NFYA	LACTB
	ELF1	EFHC1
	IKZF1	NLRP3
	ELF1	NLRP3
	IKZF2	NLRP3
	KMT2A	NLRP3
	NFYA	NLRP3
	REL	NLRP3
	STAT1	NLRP3
	TEF	NLRP3
	PTTG1	NLRP3
	NCOR1	NLRP3
	E2F5	MIR155HG
	ELF1	MIR155HG
	KMT2A	MIR155HG
	LEF1	MIR155HG
	REL	MIR155HG
	BACH2	MIR155HG
	IKZF1	ERMAP
	UHRF1	ERMAP
	MYC	ERMAP
	E2F5	BTBD9
	FOSL2	BTBD9
	LMO2	BTBD9
	ARNT	BTBD9
	ATF4	BTBD9
	IKZF1	MBD6
	EGR1	MBD6
	ELF1	MBD6
	FOXO3	MBD6
	ARNT	MBD6
	MAZ	MBD6
	NFYA	MBD6
	RREB1	MBD6
	ZNF143	MBD6
	RUNX2	MBD6
	RUNX1	MBD6
	UHRF1	GPRIN1
	MAZ	GPRIN1
	RUNX1	GPRIN1
	ELF1	SLC25A25
	MAZ	SLC25A25
	NFYA	SLC25A25
	STAT1	SLC25A25
	ELF1	STK11IP
	MEF2A	STK11IP
	MEF2C	STK11IP
	STAT1	STK11IP
	LMO2	TUBGCP5
	KMT2A	TUBGCP5
	HBP1	FMNL2
	HMGB2	FMNL2
	IRF1	FMNL2
	IRF2	FMNL2
	ARNT	FMNL2
	MAZ	FMNL2
	KMT2A	FMNL2
	MYC	FMNL2
	ARID5B	FMNL2
	ELF1	OSBPL9
	NR3C1	OSBPL9
	MAZ	OSBPL9
	ATF4	OSBPL9
	NFYA	OSBPL9
	REL	OSBPL9
	ELF1	FBXO32
	FOXO3	FBXO32
	HBP1	FBXO32
	HMGB2	FBXO32
	ARNT	FBXO32
	MEF2A	FBXO32
	MEF2C	FBXO32
	MYC	FBXO32
	LEF1	FBXO32
	CLOCK	FBXO32
	UHRF1	ZNF618
	MAZ	ZNF618
	KMT2A	MB21D1
	RUNX1	SLC26A9
	BPTF	NT5C3B
	EGR1	KCTD12
	KMT2A	KCTD12
	IKZF2	DDIT4L
	FLI1	DDIT4L
	LMO2	DDIT4L
	MAZ	DDIT4L
	NFYA	DDIT4L
	MYB	SLC25A26
	HBP1	CIRBP
	HMGB2	CIRBP
	MAZ	CIRBP
	ATF4	CIRBP
	NFYA	CIRBP
	LEF1	CIRBP
	ARID5B	CIRBP
	ELF1	UHRF2
	GTF2I	UHRF2
	ARNT	UHRF2
	MAZ	UHRF2
	MEF2A	UHRF2
	MEF2C	UHRF2
	KMT2A	UHRF2
	MYC	UHRF2
	IRF1	ZNF689
	IRF2	ZNF689
	KMT2A	ZNF689
	NFYA	ZNF689
	KMT2A	DIS3L
	FLI1	IQCD
	E2F5	ZNF653
	EGR1	ZNF653
	ELF1	ZNF653
	MAZ	ZNF653
	E2F5	ZNF526
	FOSL2	ZNF526
	ARNT	ZNF526
	MAZ	ZNF526
	NFYA	ZNF526
	ZNF143	ZNF526
	KMT2A	ABHD15
	NFYA	ABHD15
	LEF1	ABHD15
	ELF1	CKS1B
	ARNT	CKS1B
	MAZ	CKS1B
	MYC	CKS1B
	NFYA	CKS1B
	STAT1	CKS1B
	KMT2A	CKS2
	NFYA	CKS2
	FOXP1	FAM129A
	UHRF1	FAM129A
	NFYA	FAM129A
	RUNX1	FAM129A
	KMT2A	MED12L
	EGR1	ARAP2
	ELF1	ARAP2
	FOSL2	ARAP2
	LMO2	ARAP2
	MAZ	ARAP2
	CLOCK	ARAP2
	ELF1	ARAP1
	ELF1	AGAP1
	FOXO3	AGAP1
	ARNT	AGAP1
	MAZ	AGAP1
	NFYA	AGAP1
	ZNF143	AGAP1
	ARID5B	AGAP1
	MIR548Z	SSX2IP
	MIR101-1	SSX2IP
	MYB	SSX2IP
	ELF1	FTSJ3
	RUNX1	FTSJ3
	CLOCK	FTSJ3
	ELF1	TAGAP
	FOXO3	TAGAP
	MIR21	TAGAP
	MEF2A	TAGAP
	MEF2C	TAGAP
	LEF1	TAGAP
	TEF	TAGAP
	RUNX1	TAGAP
	EGR1	AP1S1
	ELF1	AP1S1
	GTF2I	AP1S1
	LMO2	AP1S1
	ARNT	AP1S1
	MAZ	AP1S1
	ZNF143	AP1S1
	KMT2A	CLCN4
	MYC	CLCN4
	NFYA	CLCN5
	FOSL2	ANTXR2
	MAZ	ANTXR2
	BACH2	ANTXR2
	ATF4	ZNF511
	FOSL2	CHCHD1
	ARNT	CHCHD1
	ZNF143	CHCHD1
	UHRF1	CFAP70
	MYC	CFAP70
	ELF1	CLCN6
	GTF2I	CLCN6
	LMO2	CLCN6
	ARNT	CLCN6
	MAZ	CLCN6
	MYC	CLCN6
	STAT1	CLCN6
	CLOCK	CLCN6
	ARNT	CLCN7
	MYC	CLCN7
	CLOCK	CLCN7
	GTF2I	PDZD8
	ARNT	PDZD8
	KMT2A	PDZD8
	MYC	PDZD8
	ATF4	PDZD8
	NFYA	PDZD8
	E2F5	ADD2
	MEF2A	ADD2
	MEF2C	ADD2
	MYC	ADD2
	IKZF2	CLK1
	KMT2A	CLK1
	HOXA9	ADD3
	KMT2A	ADD3
	NFYA	ADD3
	STAT1	ADD3
	RUNX1	ADD3
	IKZF1	TPP1
	ELF1	TPP1
	RBPJ	TPP1
	ARNT	TPP1
	MYC	TPP1
	NFIL3	TPP1
	CLOCK	TPP1
	ELF1	CLN3
	RUNX1	CLN3
	KMT2A	CYP2R1
	KMT2A	ARL14EP
	MYC	LRRK2
	EGR1	ZNF641
	ELF1	ZNF641
	FLI1	ZNF641
	HOXA9	ZNF641
	MAZ	ZNF641
	REL	ZNF641
	KMT2A	TPH2
	EGR1	CLTC
	ELF1	CLTC
	FLI1	CLTC
	ARNT	CLTC
	MAZ	CLTC
	KMT2A	CLTC
	MYC	CLTC
	CLOCK	CLTC
	NFYA	IKBIP
	PAX5	IKBIP
	ELF1	HIST4H4
	KMT2A	HIST4H4
	MYC	HIST4H4
	RUNX1	HIST4H4
	MYC	BTBD11
	FOXP1	ALKBH2
	IKZF1	SLAIN1
	E2F5	SLAIN1
	EGR1	SLAIN1
	LMO2	SLAIN1
	ARNT	SLAIN1
	MAZ	SLAIN1
	KMT2A	SLAIN1
	MYC	SLAIN1
	CLOCK	SLAIN1
	IKZF2	PLD4
	KMT2A	LRR1
	MYC	JDP2
	NFYA	PLIN2
	RUNX1	PLIN2
	ELF1	CCR1
	FOSL2	CCR1
	MEF2A	CCR1
	MEF2C	CCR1
	RUNX1	CCR1
	PTTG1	CCR1
	NFYA	SLC25A29
	STAT1	SLC25A29
	BCL6	SENP8
	MYC	TARSL2
	RUNX1	TARSL2
	STAT1	NIPA1
	ELF1	SPATA2L
	MAZ	SPATA2L
	ELF1	UBALD1
	NR3C1	UBALD1
	BACH2	UBALD1
	STAT1	UBALD1
	ZNF143	UBALD1
	MIR548Z	ZNF720
	ELF1	METTL23
	FOXP1	METTL23
	MAZ	METTL23
	KMT2A	METTL23
	NFYA	METTL23
	MAZ	MSI2
	RREB1	MSI2
	RREB1	CANT1
	KMT2A	USP43
	ELF1	HEXIM2
	MIR16-2	ANKRD13B
	MIR636	ANKRD13B
	MYC	SLC43A2
	NFYA	SLC43A2
	LEF1	SLC43A2
	STAT1	SLC43A2
	ELF1	WDR81
	FOXO3	WDR81
	GTF2I	WDR81
	LMO2	WDR81
	ARNT	WDR81
	MAZ	WDR81
	MYC	WDR81
	RUNX1	WDR81
	CLOCK	WDR81
	FOXP1	RN7SK
	RUNX1	RN7SK
	ELF1	INO80C
	KMT2A	INO80C
	IRX5	TTC39C
	ELF1	TTC39C
	ZHX3	TTC39C
	KMT2A	TTC39C
	REL	TTC39C
	BACH2	TTC39C
	ELF1	ZNF816
	FOXP1	ZNF543
	RBPJ	ZNF543
	MYC	ZNF543
	ELF1	C19orf70
	RBPJ	C19orf70
	ZNF143	C19orf70
	MIR548Z	ZNF813
	UHRF1	ZNF441
	ELF1	ALDH16A1
	ARNT	ALDH16A1
	HBP1	IRGQ
	GTF2I	IRGQ
	HMGB2	IRGQ
	ATF4	IRGQ
	RREB1	IRGQ
	MAZ	PLK3
	MYC	PLK3
	ATF4	PLK3
	NFIL3	PLK3
	ELF1	MOB3A
	MAZ	MOB3A
	KMT2A	MOB3A
	MIR548Z	ZNF792
	UHRF1	NR2C2AP
	LMO2	ANKLE1
	MYC	ANKLE1
	ELF1	B3GALT6
	NFYA	B3GALT6
	LMO2	LYPLAL1
	RREB1	LYPLAL1
	ZNF143	LYPLAL1
	ELF1	ZNF684
	RBPJ	ZNF684
	MIR636	COL1A1
	ARNT	C1orf216
	MYC	C1orf216
	PAX5	C1orf216
	CLOCK	C1orf216
	RUNX1	UBXN10
	FLI1	FCRLB
	NFYA	FCRLB
	RUNX1	FCRLB
	IKZF1	LIX1L
	E2F5	LIX1L
	EGR1	LIX1L
	ELF1	LIX1L
	LMO2	LIX1L
	MAZ	LIX1L
	NFYA	LIX1L
	RREB1	LIX1L
	ELF1	IQGAP3
	IKZF2	IQGAP3
	ZNF143	IQGAP3
	ETS2	C1orf162
	MEF2A	TBC1D20
	MEF2C	TBC1D20
	KMT2A	TBC1D20
	CLOCK	TBC1D20
	ELF1	SLX4IP
	FOXP1	SLX4IP
	EGR1	TANGO2
	ELF1	TANGO2
	MIR548Z	COL5A2
	ELF1	EMID1
	KMT2A	EMID1
	RUNX1	EMID1
	ELF1	PPP1R21
	GTF2I	PPP1R21
	MAZ	PPP1R21
	BACH2	PPP1R21
	RREB1	PPP1R21
	UHRF1	NUP35
	LMO2	NUP35
	NFYA	NUP35
	STAT1	CMPK2
	ELF1	TMEM18
	MYC	TMEM18
	RUNX1	LINC01006
	KMT2A	FBLN7
	IKZF1	CLHC1
	ELF1	CLHC1
	GTF2I	CLHC1
	IRF1	CLHC1
	IRF2	CLHC1
	TEF	CLHC1
	ZNF143	CLHC1
	RBPJ	AP1S3
	LMO2	AP1S3
	MAZ	AP1S3
	ZNF143	AP1S3
	MIR21	UBR3
	IKZF2	GALM
	GTF2I	GALM
	MAZ	GALM
	MEF2A	GALM
	MEF2C	GALM
	ZNF143	GALM
	MAZ	ZFAND2B
	ATF4	ZFAND2B
	RREB1	ZFAND2B
	KMT2A	CRYBG3
	MIR548Z	LRRC15
	ELF1	FAM43A
	GTF2A1	FAM43A
	MAZ	FAM43A
	KMT2A	FAM43A
	MYC	FAM43A
	PAX5	FAM43A
	FOSL2	KLF6
	GTF2A1	KLF6
	ARNT	KLF6
	MAZ	KLF6
	MEF2A	KLF6
	MEF2C	KLF6
	KMT2A	KLF6
	MYC	KLF6
	ATF4	KLF6
	NFIL3	KLF6
	NFYA	KLF6
	PAX5	KLF6
	RREB1	KLF6
	RUNX1	KLF6
	CLOCK	KLF6
	RBPJ	SLC31A2
	ARNT	SLC31A2
	MYC	SLC31A2
	ZNF143	SLC31A2
	ARID5B	SLC31A2
	RUNX2	SLC31A2
	RUNX1	SLC31A2
	CLOCK	SLC31A2
	NFYA	NUDT16
	ELF1	PPM1M
	FOXP1	PPM1M
	NR3C1	PPM1M
	KMT2A	PPM1M
	REL	PPM1M
	ETS2	OCIAD2
	IKZF1	MAP3K8
	IKZF2	MAP3K8
	FOSL2	MAP3K8
	KMT2A	MAP3K8
	MYC	MAP3K8
	REL	MAP3K8
	ELF1	CPEB2
	IKZF2	CPEB2
	FOSL2	CPEB2
	LMO2	CPEB2
	MAZ	CPEB2
	MEF2A	CPEB2
	MEF2C	CPEB2
	KMT2A	CPEB2
	ATF4	CPEB2
	LEF1	CPEB2
	REL	CPEB2
	RREB1	CPEB2
	CLOCK	CPEB2
	MAZ	EMB
	KMT2A	EMB
	ELF1	FAM173B
	ELF1	GRPEL2
	MYC	GRPEL2
	HBP1	NUDCD2
	HMGB2	NUDCD2
	MYC	NUDCD2
	KMT2A	ADAT2
	ELF1	STXBP5
	LMO2	STXBP5
	KMT2A	STXBP5
	ELF1	NCOA7
	IKZF2	NCOA7
	HBP1	NCOA7
	NR3C1	NCOA7
	HMGB2	NCOA7
	HOXA9	NCOA7
	IRF1	NCOA7
	IRF2	NCOA7
	MAZ	NCOA7
	MEF2A	NCOA7
	MEF2C	NCOA7
	MEIS1	NCOA7
	KMT2A	NCOA7
	TEF	NCOA7
	FOXO3	HINT3
	KMT2A	HINT3
	IKZF2	CD109
	FOSL2	CD109
	PAX5	CD109
	BACH2	CD109
	FLI1	PM20D2
	HOXA9	PM20D2
	RBPJ	PM20D2
	KMT2A	PM20D2
	MYC	PM20D2
	YY1	LRGUK
	LMO2	CLDN7
	MYC	CCDC26
	ELF1	CPT1A
	UHRF1	CPT1A
	MAZ	CPT1A
	NFYA	CPT1A
	MIR636	TMEM68
	ETS2	HGSNAT
	NFE2L1	HGSNAT
	YY1	HGSNAT
	STAT1	FAM69B
	E2F5	CREB1
	EGR1	CREB1
	ELF1	CREB1
	FOSL2	CREB1
	NR3C1	CREB1
	GTF2I	CREB1
	RBPJ	CREB1
	LMO2	CREB1
	MAZ	CREB1
	KMT2A	CREB1
	PAX5	CREB1
	REL	CREB1
	BACH2	CREB1
	RREB1	CREB1
	ZNF143	CREB1
	UHRF1	SLITRK4
	UHRF1	APOOL
	IRF1	APOOL
	IRF2	APOOL
	LMO2	CRIP1
	PAX5	CRIP1
	MYC	CRK
	NFYA	CRK
	STAT1	CRK
	PTTG1	CRK
	GTF2I	DOCK11
	LMO2	DOCK11
	ARNT	DOCK11
	MAZ	DOCK11
	KMT2A	DOCK11
	MYC	DOCK11
	IKZF1	SPIN4
	ELF1	SPIN4
	LMO2	SPIN4
	KMT2A	SPIN4
	E2F5	CRKL
	ELF1	CRKL
	IKZF2	CRKL
	FOXO3	CRKL
	HBP1	CRKL
	HMGB2	CRKL
	LMO2	CRKL
	ARNT	CRKL
	KMT2A	CRKL
	NFYA	CRKL
	LEF1	CRKL
	MIR548Z	CRMP1
	UHRF1	C20orf96
	MAZ	C20orf96
	RUNX1	C20orf96
	MIR636	NOL4L
	ELF1	SAMD10
	MAZ	SAMD10
	NFYA	SAMD10
	LEF1	SAMD10
	KMT2A	SOGA1
	IRX5	UBE2F
	ELF1	UBE2F
	ZHX3	UBE2F
	MAZ	UBE2F
	MEF2A	UBE2F
	MEF2C	UBE2F
	NFYA	UBE2F
	LEF1	UBE2F
	ARNT	NEURL2
	MAZ	NEURL2
	MYC	NEURL2
	CLOCK	NEURL2
	ELF1	ZSWIM3
	UHRF1	NANP
	LMO2	NANP
	NFYA	NANP
	PTTG1	NANP
	MYB	ISM1
	FOXO3	SIRPA
	MAZ	SIRPA
	MEF2A	SIRPA
	MEF2C	SIRPA
	TEF	SIRPA
	KMT2A	STK35
	EGR1	PARP4
	ELF1	PARP4
	ARNT	PARP4
	ELF1	VTI1A
	E2F5	MAPK14
	IRF1	MAPK14
	IRF2	MAPK14
	LMO2	MAPK14
	KMT2A	MAPK14
	NFYA	MAPK14
	STAT1	MAPK14
	PTTG1	MAPK14
	IKZF1	CSF1
	IKZF2	CSF1
	FOXO3	CSF1
	RBPJ	CSF1
	IRF1	CSF1
	IRF2	CSF1
	LMO2	CSF1
	ARNT	CSF1
	MAZ	CSF1
	MYC	CSF1
	REL	CSF1
	RREB1	CSF1
	ZNF143	CSF1
	RUNX2	CSF1
	RUNX1	CSF1
	CLOCK	CSF1
	NCOR1	CSF1
	GTF2I	XRRA1
	MAZ	XRRA1
	NFYA	XRRA1
	REL	XRRA1
	ZNF143	XRRA1
	IKZF2	CSF1R
	FOXO3	CSF1R
	FLI1	CSF1R
	FOSL2	CSF1R
	HBP1	CSF1R
	HMGB2	CSF1R
	LEF1	CSF1R
	RUNX2	CSF1R
	RUNX1	CSF1R
	EGR1	SESN3
	GTF2I	SESN3
	MAZ	SESN3
	NFYA	SESN3
	RUNX1	SESN3
	ATF4	TMEM86A
	NFYA	TMEM86A
	ARID5B	TMEM86A
	E2F5	PRICKLE1
	EGR1	PRICKLE1
	ELF1	PRICKLE1
	ARNT	PRICKLE1
	KMT2A	PRICKLE1
	LEF1	PRICKLE1
	ETS2	SLC2A14
	MIR16-2	SLC2A14
	GTF2I	CPNE8
	KMT2A	CPNE8
[truncated: 14,894 more rows]

## Sheet: RUNX1 GRN nodes
			KMT2A-AFF1 siRNA nas.RNA-seq stats		RUNX1 siRNA nas.RNA-seq stats		EPZ-5676 nas.RNA-seq stats		iBET nas.RNA-seq stats
Geneid	degree	stress	KMT2A-AFF1.logFC	KMT2A-AFF1.FDR	RUNX1.logFC	RUNX1.FDR	EPZ.logFC	EPZ.FDR	IBET.logFC	IBET.FDR	Tzelepis_CRISPR_screen_dropout_class
EGR1	557	49122	0.934544	6.73529e-16	-1.05465	4.56384e-09	-0.755978	1.37232e-05	1.73655	1.3912e-46	non-dropout
RUNX1	3985	820836	-0.719582	3.25934e-47	0.106548	0.0917954	-0.331148	0.0284662	0.100256	0.0556349	AF4 & AF9
E2F3	345	78721	0.0325767	0.651093	-0.143323	0.0442556	-0.0191329	0.93193	-0.396577	3.38511e-11	non-dropout
EGR3	344	90780	0.37007	0.0190043	-0.468928	0.000164012	-0.235962	0.228704	-0.848383	2.34458e-27	non-dropout
IKZF2	263	577	0.589809	1.42196e-22	-0.410411	4.23116e-06	1.00515	2.02832e-11	-0.112619	0.0886884	non-dropout
HEY1	459	282	NA	NA	-1.14436	0.0411879	NA	NA	1.24231	0.00251064	non-dropout
HEY2	459	282	-0.0978638	0.794716	1.021	5.30641e-05	0.321501	0.448431	1.21974	5.19927e-08	non-dropout
FOXP1	261	39277	-0.139587	0.0441605	0.203611	0.00298649	-0.247276	0.163629	0.0155256	0.846212	non-dropout
SNAI3	863	21113	0.692316	4.00963e-08	-0.938748	0.000551123	1.3185	7.27296e-06	-0.847289	1.30395e-07	non-dropout
ID1	504	20988	-0.527879	1.63304e-08	-0.771749	1.17781e-13	-0.660592	0.000180729	-0.512554	1.08837e-12	non-dropout
ARNTL	498	93304	-0.0562959	0.554526	0.374374	6.14733e-07	0.371841	0.0461196	0.543675	1.32275e-10	non-dropout
MIR26B	376	36853	-0.0997822	0.801466	-0.656574	0.0130444	-0.953591	0.0483555	-1.44938	0.00103781	NA
MNT	459	282	0.0859563	0.410367	-0.242051	0.0022972	-0.190395	0.303161	0.00495623	0.950216	non-leukemia-specific dropout
MXI1	784	71450	0.497649	5.37782e-07	0.491325	7.61177e-09	-0.100299	0.679883	-0.362387	6.83359e-05	non-dropout
MYB	786	113616	0.0436848	0.703726	0.417309	7.47586e-09	0.191442	0.310827	-0.8127	8.438e-30	AF4 & AF9
NFYA	1219	73634	0.182021	0.00263295	-0.337716	6.07241e-08	-0.116503	0.524222	-0.0469703	0.469004	non-dropout
NFYB	915	31670	-0.0715001	0.446839	-0.353531	0.000576365	0.142643	0.539813	-0.272039	0.000365578	non-dropout
RXRA	330	15378	-0.419643	7.56738e-08	0.631054	2.32139e-05	-0.188942	0.487536	-1.34985	3.55237e-36	non-dropout
SNAI1	886	17150	-0.30608	0.0618431	-0.381469	0.0157424	-1.10107	2.06135e-09	0.503116	5.90494e-08	non-dropout
HMGA2	260	66039	-1.42994	2.41646e-63	-0.358094	4.47339e-08	-1.42636	3.64129e-25	-0.143735	0.0184614	non-dropout
MXD3	461	10898	-0.409966	3.07925e-06	0.557124	3.05433e-11	-0.11801	0.679115	0.404176	4.6106e-05	non-dropout
E2F6	1822	59039	0.228682	0.000913903	-0.262822	0.000111025	-0.339008	0.0594277	0.0704284	0.277532	non-dropout
ETS1	1199	86696	0.136188	0.117681	1.28648	5.53105e-72	0.545887	0.00140865	-0.0553156	0.653657	non-dropout
ATF5	514	4362	-0.461795	1.12902e-07	0.337382	0.0135234	-0.703627	1.76881e-05	1.07755	6.65298e-46	non-dropout
GABPA	1121	107474	-0.0408904	0.776037	-0.257446	0.014722	0.164814	0.469348	-0.0111019	0.886102	non-leukemia-specific dropout
SPIB	615	21063	0.238893	0.0204931	-1.18548	5.866e-23	1.20176	3.19582e-09	-0.794431	7.68445e-18	non-dropout
ZBTB6	305	2821	-0.197879	0.0280529	-0.278539	0.00154601	-0.0556793	0.796669	-0.47655	2.53311e-14	non-dropout
ZIC2	202	22051	0.130729	0.583433	0.738017	4.91692e-07	0.254341	0.495592	0.514763	0.017064	non-dropout
MIR708	8	0	NA	NA	1.57615	0.00143169	NA	NA	NA	NA	NA
IKZF1	275	16955	-1.28082	2.45285e-92	0.926292	2.80025e-43	-0.550993	0.000233498	-0.357948	1.48157e-09	non-dropout
JUN	391	97264	-0.140728	0.0864563	-0.481028	1.2924e-05	-0.216574	0.325501	1.26456	2.8163e-26	non-dropout
PAX6	32	858	-0.646248	3.31208e-19	-0.203976	0.00511299	0.0525418	0.84398	1.25114	5.09332e-60	non-dropout
REL	294	11762	0.270151	0.00136136	-0.322101	0.000114001	0.430096	0.0298987	0.693928	4.64765e-23	non-dropout
SREBF1	864	42111	-0.377236	0.000222345	-0.345883	2.40732e-05	-0.627465	0.000317883	-0.318279	2.42296e-06	non-leukemia-specific dropout
FOXO1	223	46410	-0.0713133	0.606373	1.58658	1.17617e-38	1.15763	7.08185e-08	-0.156336	0.270078	non-dropout
FOXO3	211	16922	-0.183317	0.00513603	-0.274864	4.42954e-05	-0.35969	0.0315995	0.378345	1.26449e-09	non-dropout
MEF2C	321	12811	-0.55483	3.67835e-19	0.139916	0.022966	-0.421019	0.00569852	-0.0111466	0.851284	non-dropout
MYBL2	173	2268	-0.0930402	0.323232	-0.341604	1.52905e-06	-0.445659	0.00630321	0.16451	0.00763598	non-dropout
SMARCA5	132	6920	-0.089466	0.194931	-0.208719	0.00245552	0.0541345	0.801344	0.459891	8.75061e-18	non-leukemia-specific dropout
NCOR2	122	1841	-0.0660905	0.305867	0.277625	0.00031633	0.0164191	0.946655	-0.0963364	0.152285	non-dropout
RBPJ	232	22868	0.167366	0.0102072	-0.260935	0.000412363	0.0458116	0.839765	-0.251964	5.76691e-05	non-dropout
ATF2	205	17392	0.118267	0.110241	-0.260684	0.00197675	0.228757	0.226497	0.128395	0.0386439	non-dropout
GTF2A1	124	7902	-0.244141	0.0199093	-0.776305	2.78636e-19	0.366473	0.0564319	0.0281707	0.74535	non-dropout
NFATC1	447	41128	0.0777489	0.31405	0.8002	3.60523e-21	0.388895	0.0706255	-0.577018	1.85101e-10	non-dropout
NFATC2	439	16433	0.0187723	0.835133	0.523441	3.15752e-10	-0.0233348	0.919227	0.0379461	0.676347	non-dropout
NFATC3	438	25596	0.0214934	0.832949	-0.294769	1.64862e-07	-0.100763	0.587589	-0.289765	2.56613e-06	non-dropout
TEAD1	238	33026	0.0784355	0.63241	0.37793	0.000129292	0.557773	0.00416179	0.0364217	0.764829	non-dropout
TFAP2A	641	24297	-0.24938	0.0260087	-0.402385	0.000367336	0.113873	0.670954	0.265215	0.0183756	non-dropout
MZF1	626	14403	0.276972	0.000645565	0.397494	9.60756e-06	0.0224525	0.939552	-0.698666	5.09621e-09	non-dropout
CEBPA	298	13266	0.0362733	0.691928	-0.961488	2.33588e-22	0.328157	0.124913	-0.236078	0.000805252	AF4 & AF9
CREB1	468	30816	-0.0216208	0.793037	-0.220705	0.00448337	0.383212	0.0422337	0.0898596	0.164566	non-dropout
HIC1	313	1402	0.643714	1.8116e-05	0.508171	0.00225059	-0.281029	0.333143	-0.61884	7.28061e-09	non-dropout
JUND	541	68470	0.0970776	0.423412	-0.259313	0.00983832	-0.208236	0.275914	0.686958	1.11286e-24	non-dropout
USF1	357	4109	0.259131	0.000124676	0.195829	0.0215826	-0.111055	0.609656	0.110457	0.241444	non-dropout
BHLHE40	362	38192	0.997395	1.52078e-19	-1.57555	5.73522e-12	2.02901	2.02017e-26	-1.2703	1.03354e-30	non-dropout
NRF1	770	4709	-0.207533	0.00119346	-0.189113	0.0180503	-0.0679935	0.744865	0.645241	3.5545e-18	non-leukemia-specific dropout
NOTCH1	380	8374	-0.183479	0.00339704	0.256697	0.00986555	-0.669113	5.48503e-05	0.664417	6.31487e-12	non-dropout
HSF2	134	18363	0.0117479	0.905823	-0.46559	3.02349e-10	-0.141705	0.490347	-0.0582507	0.409068	non-dropout
MEIS1	83	664	-0.458249	7.32478e-17	0.24367	3.48732e-05	0.207176	0.222545	0.365561	2.41604e-12	non-dropout
VDR	131	31086	-0.239015	0.0221389	0.59932	3.67508e-07	0.468128	0.0342242	1.26452	8.45808e-44	non-dropout
UHRF1	346	16685	-0.161378	0.00458007	-0.260284	7.50411e-05	-0.193619	0.275391	-0.480045	4.45658e-18	NA
BPTF	224	7607	-0.0451426	0.521486	0.342556	1.56193e-06	0.241671	0.146851	-0.260222	8.24716e-06	non-leukemia-specific dropout
FOSL2	231	43561	-0.520527	4.73141e-25	-0.422475	6.22177e-07	-0.267609	0.120307	-0.206857	0.000824963	non-dropout
HBP1	206	2687	0.468436	6.80529e-10	0.173808	0.022868	0.613892	0.000799522	0.0736387	0.496111	non-dropout
HMGB2	213	6739	-0.317996	7.95104e-07	-0.242079	0.000471321	-0.150114	0.440125	0.321408	7.76335e-09	non-dropout
HMGB3	204	2642	0.0198848	0.83647	-0.240284	0.00182063	-0.0025048	0.991951	0.338029	2.83615e-07	non-dropout
LEF1	288	11426	-0.410059	1.74523e-11	0.559666	8.95377e-23	-0.563108	0.000329728	-0.414727	1.57093e-14	non-dropout
BACH1	146	3855	-0.0574264	0.415849	-0.22673	0.000422853	0.00470374	0.984998	0.485527	1.97607e-20	non-dropout
BACH2	153	37462	0.610141	2.62684e-17	2.10409	4.88483e-170	1.376	1.97777e-17	0.416596	0.000311648	non-dropout
TCF7	284	5362	0.294347	1.93314e-05	-0.624773	1.52273e-14	0.484978	0.00214168	-1.5759	4.27888e-101	non-dropout
TCF7L2	284	433	-0.580513	2.23063e-09	0.398712	7.94523e-06	-0.338102	0.0979581	-0.279489	0.00133071	non-dropout
UBTF	224	15047	-0.1542	0.0520993	0.222037	0.00911525	-0.46666	0.00595966	-0.389567	2.8379e-10	non-leukemia-specific dropout
RUNX2	238	10423	-0.306261	1.25238e-06	0.284988	6.02673e-06	-0.147702	0.413574	0.123231	0.0276544	non-dropout
RUNX3	234	1795	1.97215	2.30347e-51	0.895205	2.18785e-09	3.64731	2.08206e-68	-2.57202	1.55158e-52	non-dropout
GATA3	14	122	-0.138876	0.0966168	0.645742	1.13509e-09	-0.131107	0.579825	-1.06614	1.04436e-13	non-dropout
STAT5A	87	2034	0.273839	0.0541195	1.41977	1.08241e-45	-0.35464	0.162364	-1.04264	3.99841e-18	non-dropout
STAT5B	94	4779	0.0621517	0.520237	0.7182	7.93283e-16	0.125986	0.560294	-0.159347	0.178003	AF9 specific
ARID5B	192	31540	-0.292896	4.43348e-05	1.23692	4.60122e-83	0.258314	0.114946	0.088998	0.281358	non-dropout
NR1H3	9	0	-0.0899542	0.598489	-0.531906	0.00317604	-0.086423	0.813498	-0.0397282	0.901298	non-dropout
CEBPG	104	1484	-0.169644	0.00331883	-0.224146	0.00112711	0.0541184	0.7881	-0.596346	2.02161e-24	AF4 specific
BCL6	513	29214	-0.133992	0.0832364	1.72795	1.26234e-85	0.498946	0.00313611	0.996712	3.46068e-29	non-dropout
SPI1	85	13755	-0.0585148	0.647586	0.122768	0.371087	0.792757	9.18714e-06	-2.17789	1.41055e-65	AF9 specific
STAT1	12	308	0.23965	0.000630593	-0.117538	0.125643	-0.218531	0.213583	0.618613	2.33228e-25	non-dropout
RREB1	365	67799	0.25788	6.0736e-06	0.152684	0.039488	-0.187635	0.278941	-0.267183	1.3564e-05	non-dropout
IRX3	302	23610	-0.707116	1.13343e-06	-0.62237	0.00264535	-0.130633	0.721784	-0.211776	0.301172	non-dropout
SOX5	267	8598	0.685319	0.0126939	2.35366	3.84836e-16	2.346	8.16794e-10	NA	NA	non-dropout
GFI1	616	63932	0.143952	0.0185534	0.399106	1.89853e-07	-0.178968	0.346889	-1.29335	3.51276e-67	non-dropout
SMAD3	170	24423	-0.488826	4.05731e-05	2.19098	5.62687e-146	1.80058	2.23385e-21	-0.277643	0.0235663	non-dropout
SMAD4	155	16300	-0.099149	0.129101	-0.184136	0.0217772	0.0631882	0.769142	0.17521	0.00278532	non-dropout
SMAD5	146	8609	0.0649326	0.463243	-0.177806	0.0383979	0.249654	0.187002	-0.0502982	0.430799	NA
SMAD7	157	22949	-0.224477	0.0284292	-0.411	0.000374084	0.273598	0.153686	-0.486723	6.06991e-13	non-dropout
TCF4	112	3093	-0.782152	1.25522e-06	0.763726	1.59509e-05	0.825732	0.00412424	0.12837	0.324386	non-dropout
TCF3	116	496	0.294007	3.23334e-05	0.441402	3.8777e-08	-0.052589	0.814395	-0.774341	7.92506e-28	AF4 & AF9
TCF12	122	3389	-0.11988	0.051472	0.202964	0.00162308	-0.114467	0.531156	0.207085	0.000287969	AF9 specific
NFE2	195	6389	1.2158	4.34354e-19	-2.67431	3.30975e-24	2.22094	2.37823e-17	-3.96208	9.87672e-16	non-dropout
MIR548Z	35	3293	NA	NA	NA	NA	NA	NA	NA	NA	NA
MIR133A2	18	1792	NA	NA	NA	NA	NA	NA	NA	NA	NA
MIR147A	4	137	NA	NA	NA	NA	NA	NA	NA	NA	NA
MIR182	17	891	NA	NA	NA	NA	NA	NA	NA	NA	NA
MIR186	28	3703	-0.0994521	0.78691	-0.350263	0.185939	0.89103	0.0252082	0.239203	0.0728319	NA
MIR21	14	1020	0.866785	0.00241398	NA	NA	NA	NA	1.0519	0.005294	NA
MIR222	9	606	NA	NA	NA	NA	NA	NA	NA	NA	NA
MIR30C2	23	2961	NA	NA	NA	NA	NA	NA	NA	NA	NA
MYC	59	11766	-0.248787	4.12572e-05	-0.10124	0.412391	-0.812423	6.62392e-08	-1.51086	2.26548e-127	non-leukemia-specific dropout
SP1	139	33569	0.0127009	0.861921	-0.035568	0.671686	-0.0785415	0.679681	-1.04543	4.25924e-78	non-dropout
MIR548A3	16	1308	NA	NA	NA	NA	NA	NA	NA	NA	NA
IRX5	110	502	-0.227499	0.0427836	-0.487658	0.000159691	0.0246606	0.939953	0.883577	2.07674e-15	non-dropout
ADNP	146	12562	-0.124493	0.0276845	-0.198317	0.00183635	-0.0530515	0.791493	-0.758687	4.67915e-48	non-dropout
NR3C1	176	10796	-0.685778	5.91022e-35	-0.331098	6.42126e-08	-0.0829398	0.670189	-0.538367	4.78538e-21	non-dropout
CEBPB	168	5465	-0.931766	4.16179e-29	-0.600073	7.00727e-05	-0.858176	1.55112e-06	0.00617305	0.953311	non-dropout
SRF	161	4202	-0.121937	0.286206	-0.223772	0.0468988	-0.413982	0.0250151	-0.0506895	0.467939	non-dropout
FLI1	150	14316	-0.142843	0.0288892	0.325298	2.65872e-06	0.380228	0.0161413	0.0973219	0.263952	non-dropout
E2F4	16	1276	-0.0222895	0.841215	0.0923613	0.339651	-0.419408	0.0292633	-0.0922012	0.225718	non-dropout
MIR130B	10	446	NA	NA	-0.376416	0.38915	-1.49923	0.00224986	NA	NA	NA
MIR140	8	604	NA	NA	NA	NA	NA	NA	NA	NA	NA
MIR211	12	698	NA	NA	NA	NA	NA	NA	NA	NA	NA
MIR223	4	179	NA	NA	NA	NA	2.51384	0.000108676	NA	NA	NA
MIRLET7B	17	1906	NA	NA	NA	NA	NA	NA	NA	NA	NA
MIR586	12	930	NA	NA	-0.260473	0.643234	NA	NA	NA	NA	NA
MIR153-1	12	1167	NA	NA	NA	NA	NA	NA	NA	NA	NA
MIR181B1	22	2846	-0.212656	0.440847	-0.0587514	0.822794	0.0714393	0.87435	-0.410582	0.0517086	NA
NFE2L1	21	828	-0.0263609	0.755375	-0.112293	0.18365	-0.199453	0.248735	0.14332	0.0284398	non-dropout
MIR497	29	3910	NA	NA	NA	NA	NA	NA	NA	NA	NA
NKX3-1	113	150	-0.075743	0.677991	0.402393	0.0146743	-0.401636	0.10403	2.00164	1.57457e-83	non-dropout
YY1	18	2206	-0.0230043	0.769297	-0.119935	0.148685	-0.20887	0.221284	0.351534	9.0023e-09	non-dropout
TCFL5	6	310	0.135372	0.126558	-0.0331693	0.748775	0.0104515	0.967854	-0.0506776	0.555601	non-dropout
MIR132	10	1059	NA	NA	NA	NA	NA	NA	NA	NA	NA
MIR155	15	1850	NA	NA	NA	NA	NA	NA	NA	NA	NA
MLLT3	3	122	-0.243745	0.18186	-0.348254	0.117049	0.495402	0.137509	0.279744	0.0893414	non-dropout
MIR196B	5	174	-1.13298	3.82528e-07	0.266628	0.378844	-0.889113	0.0289125	-0.057528	0.849395	NA
PARP1	9	0	0.0273822	0.718488	0.441259	2.49962e-13	-0.153009	0.392162	-0.458153	1.16733e-16	non-dropout
KMT2A	12	345	-0.165467	0.00468636	0.103073	0.115671	-0.287071	0.0711959	0.118295	0.039334	non-dropout
MIR23A	19	1352	0.0724162	0.869491	0.0227284	0.963408	-0.392083	0.575397	0.872026	0.000360416	NA
MIR23B	18	1311	NA	NA	NA	NA	NA	NA	NA	NA	NA
GATA4	4	63	NA	NA	NA	NA	NA	NA	NA	NA	non-dropout
NR4A1	45	305	1.15288	2.937e-08	1.09786	7.20098e-08	0.654835	0.0124154	0.169762	0.112401	non-dropout
SP3	23	1365	-0.114435	0.0570326	-0.167513	0.0179374	-0.0238863	0.913855	-0.274893	8.80808e-07	AF9 specific
MIR326	12	523	NA	NA	NA	NA	NA	NA	NA	NA	NA
ERF	14	63	0.210202	0.0302968	-0.239127	0.0293411	-0.474149	0.00802642	0.61419	7.76663e-16	non-dropout
CTCF	32	541	-0.0753141	0.302812	0.07867	0.360102	-0.13408	0.448826	-0.431857	1.45828e-12	non-leukemia-specific dropout
MIR135A2	14	1156	NA	NA	NA	NA	NA	NA	NA	NA	NA
MIR150	7	275	NA	NA	NA	NA	NA	NA	NA	NA	NA
MIR135B	13	849	NA	NA	NA	NA	NA	NA	NA	NA	NA
E2F1	15	1103	-0.0239558	0.805162	0.136915	0.105787	-0.122082	0.557119	-0.053371	0.463673	non-dropout
MIR7-2	8	545	NA	NA	NA	NA	NA	NA	NA	NA	NA
MIR7-3	10	541	NA	NA	NA	NA	NA	NA	NA	NA	NA
ETS2	6	110	-0.0243111	0.74065	-0.0926957	0.290736	-0.0168543	0.942877	-0.228126	6.54596e-05	non-dropout
ELF1	27	746	-0.442528	3.14422e-14	-0.0257573	0.756426	-0.14977	0.384996	-0.00561941	0.929108	non-dropout
IRF7	2	44	0.337977	0.00312346	0.0113516	0.953175	-0.166106	0.607599	2.65426	2.00748e-147	non-dropout
HOXA10	14	349	-1.51699	5.30007e-98	0.00458082	0.97303	-1.07359	2.65579e-12	0.0483004	0.545015	AF4 specific
NRAS	26	1019	-0.195391	0.00227122	-0.154131	0.0523112	-0.163871	0.373525	-0.430672	1.47329e-10	non-dropout
NFKBIA	9	6	-0.468712	6.39726e-15	0.223083	0.0153304	-0.28651	0.126871	0.148077	0.0469455	non-dropout
ATF3	22	1495	0.183989	0.0498978	-0.837132	1.10219e-18	-0.321768	0.0797665	1.08196	2.07426e-38	non-dropout
MAFB	19	370	NA	NA	NA	NA	NA	NA	NA	NA	non-dropout
MIR653	9	365	NA	NA	NA	NA	NA	NA	NA	NA	NA
NFKB1	23	125	0.0881789	0.253855	0.114159	0.160301	-0.149611	0.429233	-0.622958	1.94251e-19	non-dropout
MIR33B	13	1078	NA	NA	NA	NA	NA	NA	NA	NA	NA
NFKB2	12	315	-0.020915	0.889879	0.525288	1.23973e-06	-0.587562	0.00652608	0.686227	7.98077e-07	non-dropout
SKIL	20	198	0.124138	0.0665705	-0.202294	0.0369781	0.396218	0.0271918	-1.21761	3.62457e-118	non-dropout
MIR624	8	80	NA	NA	-0.388805	0.507396	NA	NA	-0.179027	0.67915	NA
SMARCA4	17	125	0.0813796	0.313915	0.18333	0.00537071	-0.198453	0.240698	-0.465455	1.6831e-14	non-dropout
HDAC2	16	499	-0.0889287	0.174519	-0.333979	2.22069e-06	-0.0448059	0.836923	-0.0204775	0.75149	non-dropout
HIVEP2	27	489	-0.965023	1.42987e-25	0.230681	0.000703136	-0.783371	9.36792e-09	0.121465	0.0360878	non-dropout
HNRNPK	14	196	-0.0592058	0.345655	-0.13633	0.0398046	-0.105199	0.567849	-0.151135	0.00814052	non-leukemia-specific dropout
WT1	40	1205	-0.222396	0.0135623	0.213608	0.0167502	-0.126227	0.539985	-1.12326	7.24357e-57	non-dropout
CNBP	19	299	-0.199213	0.000260131	-0.231587	0.00109679	-0.390848	0.00962509	-0.486846	3.29494e-19	non-dropout
ZBTB18	3	46	0.11871	0.11076	0.0417646	0.669948	0.239266	0.208289	-0.0142938	0.883328	non-dropout
BMI1	13	98	-0.116725	0.640003	0.120848	0.606876	-0.813841	0.0148494	-1.03428	0.000747463	non-dropout
LMO2	17	170	-0.488802	2.54533e-14	-0.00867094	0.943942	0.436043	0.0140735	-1.66809	6.92228e-99	non-dropout
MIR129-1	5	92	NA	NA	NA	NA	NA	NA	NA	NA	NA
ELF2	35	113	-0.0854498	0.208431	-0.0938157	0.229936	0.120179	0.526609	-0.585711	1.10367e-21	non-dropout
ELF4	16	40	0.320249	2.98229e-05	-0.0193784	0.875842	0.511805	0.000821681	-0.641326	5.94733e-18	non-dropout
CBFB	25	251	-0.100794	0.289133	-0.133623	0.115561	-0.273466	0.119932	-0.487238	4.06234e-12	AF9 specific
MIR592	6	77	NA	NA	NA	NA	NA	NA	NA	NA	NA
MIR146A	6	80	-0.556265	0.0491579	0.375	0.0913244	-0.334632	0.479209	NA	NA	NA
MIR146B	9	90	NA	NA	NA	NA	NA	NA	0.426986	0.33811	NA
TP53BP1	10	6	0.120493	0.0663629	0.295218	2.9126e-05	-0.206891	0.248347	-0.65989	2.83347e-18	non-dropout
KLF9	20	2032	-0.654084	7.41465e-31	-0.680893	2.54073e-14	-0.0574524	0.789636	-0.669856	2.45637e-31	non-dropout
HIVEP1	4	21	0.215503	0.00144293	0.180083	0.0186664	0.958317	2.28141e-10	-0.702705	5.86068e-16	non-dropout
BHLHE41	9	0	-0.906837	1.24056e-15	-0.456481	1.21338e-05	-0.0329592	0.894401	-0.95636	5.69438e-36	non-dropout
MAZ	11	201	-0.167455	0.0322311	-0.0117738	0.921989	-0.431027	0.0174232	-0.85902	3.67086e-47	non-dropout
MIR488	6	96	NA	NA	NA	NA	NA	NA	NA	NA	NA
MYOD1	3	59	NA	NA	NA	NA	NA	NA	NA	NA	non-dropout
MYOG	4	76	NA	NA	NA	NA	NA	NA	NA	NA	non-dropout
STAT2	7	170	0.385376	2.18217e-06	0.037073	0.773815	-0.0558754	0.829969	0.551755	1.85513e-11	non-dropout
STAT4	2	53	0.733742	0.0124959	0.212888	0.595092	0.821392	0.0796821	0.653826	0.0567795	non-dropout
STAT6	6	140	0.0245748	0.795171	-0.0450765	0.667552	0.153662	0.387897	-0.380101	6.87629e-08	non-dropout
ADA	2	0	-0.421082	3.36967e-05	-0.487805	1.98153e-06	0.0326079	0.906619	-1.10883	3.75224e-13	non-dropout
CDH2	21	0	0.123182	0.219248	0.202745	0.0184565	-0.0993619	0.653242	0.104061	0.226557	non-dropout
AKT3	1	0	-0.0902781	0.24343	-0.258325	0.00324656	0.0105266	0.968756	0.164424	0.0175655	non-dropout
MED6	6	0	0.107089	0.231615	-0.23791	0.0241137	0.0812248	0.733305	-0.331859	2.21674e-06	non-leukemia-specific dropout
NAALAD2	2	0	-0.591542	0.03865	-1.03747	0.00578077	-0.178429	0.741278	-0.671064	0.00394598	non-dropout
ZBTB33	4	0	-0.0256891	0.767547	-0.240445	0.00214675	0.0239701	0.919358	0.03163	0.643638	non-dropout
ZSCAN30	2	0	0.171077	0.212341	0.321142	0.022471	0.153074	0.632068	-0.516674	0.00119661	non-dropout
FAM86JP	1	0	0.211269	0.259286	-0.383664	0.0261908	-0.0250413	0.94939	-0.179286	0.399377	NA
C8orf88	1	0	-0.212772	0.188908	-0.34139	0.00607887	-0.230617	0.442963	-0.767545	1.55993e-12	non-dropout
TMPO-AS1	8	0	-0.64826	1.98723e-14	-0.172742	0.0408241	-0.194716	0.411262	-0.224448	0.0093065	NA
ACVR2B-AS1	1	0	0.217213	0.351564	-0.401333	0.0341448	-0.207693	0.599223	-1.13676	4.93034e-06	NA
LINC00476	1	0	0.659866	1.02107e-09	0.603292	5.73348e-09	0.576012	0.00128066	-0.886672	2.05785e-16	NA
MATN1-AS1	1	0	0.143319	0.460861	1.36866	3.38427e-15	0.0919012	0.841029	0.189963	0.422917	NA
ZNF37BP	2	0	0.0364616	0.702224	-0.217248	0.0407213	0.297541	0.150689	-0.398244	1.19524e-08	NA
ZNF730	1	0	-0.210783	0.0393727	-0.489173	2.53622e-07	0.320498	0.139131	0.466599	1.54336e-09	non-dropout
ZNF737	1	0	0.108384	0.201774	-0.185206	0.0153187	0.197873	0.267991	0.760188	4.17547e-41	non-dropout
TMEM221	1	0	-1.14766	5.19972e-23	0.672573	0.00337215	0.0337301	0.957689	NA	NA	non-dropout
TSTD1	1	0	0.0858773	0.55831	0.547216	0.000181636	-0.211327	0.481706	0.146607	0.511788	non-dropout
NEMP2	1	0	0.0748458	0.573189	-0.409639	0.000159636	0.332285	0.110602	-0.123119	0.210189	NA
CLUHP3	1	0	0.0988378	0.469542	0.406133	0.00225744	-0.816058	0.000156518	-0.171206	0.242619	NA
MAP3K14-AS1	1	0	0.279475	0.119072	0.63125	0.00182825	-0.0517966	0.913548	-0.658017	0.0161362	NA
JHDM1D-AS1	1	0	-0.0715596	0.818478	1.13006	0.000222435	0.190922	0.726729	0.515907	0.081662	NA
LINC00426	1	0	0.470264	2.5118e-08	0.543604	2.14006e-08	0.715644	0.000109423	-1.59635	1.51394e-37	NA
SH2B3	16	0	-0.172104	0.00387542	-0.372288	1.91645e-08	0.140925	0.416805	-0.832733	7.39539e-40	non-dropout
PCED1B-AS1	1	0	-0.127013	0.427079	-0.283747	0.00844832	0.0725354	0.795972	-2.32777	2.82387e-71	NA
NBPF20	1	0	0.31485	0.18599	0.82482	0.000325687	0.35162	0.31196	0.328233	0.1524	NA
HMGN3-AS1	1	0	-0.191215	0.261308	0.509371	0.000225794	-0.365168	0.254494	0.317731	0.0551022	NA
ZNF783	1	0	0.253824	0.0033713	0.306506	0.00385727	-0.155907	0.496174	-0.729444	2.31586e-11	non-dropout
MIR1914	1	0	0.252675	0.507946	0.9632	0.0468038	0.00855932	0.990616	NA	NA	NA
MIR1322	1	0	-0.501464	0.196174	-0.687541	0.0293382	-0.010932	0.986149	-0.0426072	0.883883	NA
MIR1207	1	0	NA	NA	0.834106	0.0315862	0.402901	0.493921	0.259332	0.461644	NA
CHAF1A	25	0	-0.112998	0.100323	-0.289872	3.72759e-05	-0.245451	0.161037	-0.148523	0.0137751	non-leukemia-specific dropout
PARP2	5	0	-0.0468132	0.636909	-0.422306	1.21724e-07	0.240357	0.224373	-0.832913	2.58589e-25	non-dropout
PARP3	1	0	0.310495	0.120909	0.642778	0.00286793	-0.82873	0.0318544	-1.26184	0.0032929	non-dropout
TOM1L1	1	0	-0.312066	0.0546606	-0.50009	0.0242466	0.0375624	0.926227	-1.47795	2.35964e-08	non-dropout
HMGXB4	3	0	0.108094	0.10911	-0.206595	0.00247228	0.069714	0.729115	0.0883285	0.153703	non-dropout
IGLL5	1	0	0.0857033	0.618486	-3.21958	4.06699e-16	1.59581	7.57121e-17	-4.78957	7.35831e-125	non-dropout
TOM1	31	0	0.5593	8.7819e-11	0.70683	4.18813e-12	0.0733402	0.794158	-0.134873	0.509551	non-dropout
KLRF2	1	0	-0.226387	0.138116	0.354885	0.000626318	-0.361188	0.0690714	-1.29792	4.64541e-36	non-dropout
SH2D3C	1	0	0.0387506	0.724327	-0.499739	2.34537e-09	0.456817	0.0296999	-1.64638	4.49734e-54	non-dropout
MAMLD1	1	0	0.586897	0.0775565	2.7443	5.97882e-08	NA	NA	NA	NA	non-dropout
RANBP9	4	0	-0.27962	4.91182e-05	-0.253075	0.000525411	0.0806824	0.693405	0.220072	0.000154731	non-dropout
DNAJB6	26	0	0.0752813	0.368287	-0.244951	0.00769739	-0.0303112	0.902006	0.215693	0.00199054	non-dropout
MIR3918	1	0	-0.18542	0.616076	0.692264	0.011112	-0.445236	0.314574	0.233406	0.323894	NA
FGD5-AS1	1	0	-0.0750944	0.318888	-0.17854	0.00887034	0.0549927	0.792125	-0.0399332	0.581278	NA
LUCAT1	1	0	0.937188	1.3714e-05	-0.956032	0.00779343	1.00337	0.00577502	-1.6226	1.78548e-18	NA
RNASEH1-AS1	1	0	-0.440062	0.0052006	-0.355463	0.0398244	-0.15724	0.617389	-1.14506	2.57168e-08	NA
IQCH-AS1	1	0	0.41331	0.00126429	0.264935	0.0305831	0.37857	0.10862	-0.0299837	0.82154	NA
TRG-AS1	1	0	0.381321	0.0286296	-0.693101	0.000145829	-0.150323	0.629776	-0.730083	6.95424e-05	NA
MKLN1-AS	1	0	NA	NA	-0.94467	0.0318132	-0.317441	0.597509	-0.116355	0.777137	NA
PSMD6-AS2	1	0	0.0544349	0.582257	0.191355	0.0412206	0.396755	0.103664	-0.0290639	0.786169	NA
KCNQ5-IT1	1	0	0.0102468	0.936145	-0.368842	0.00549236	0.270139	0.228719	-1.27698	1.82962e-33	NA
MICA	1	0	0.162281	0.0945437	-0.483434	3.75612e-05	-0.0733334	0.762385	0.818117	5.82217e-21	non-dropout
SDCBP2-AS1	1	0	0.0694017	0.621828	0.364036	0.0186704	0.079659	0.801678	-0.177359	0.300521	NA
LINC01504	1	0	0.231059	0.439541	-0.943998	0.0153187	1.23011	0.0150925	NA	NA	NA
SMC4	26	0	-0.54451	8.03863e-13	-0.310867	2.98995e-06	-0.116518	0.585807	0.248546	9.05315e-07	non-leukemia-specific dropout
GJC1	1	0	-0.476866	4.10044e-14	-0.421223	8.88785e-10	-0.0719449	0.738153	-0.265633	1.27726e-05	non-dropout
UBA2	18	0	-0.117473	0.0761693	-0.177913	0.0214516	-0.0880446	0.650949	-0.333981	1.09474e-09	non-dropout
FARSB	8	0	0.120313	0.0959655	-0.360779	3.60782e-05	0.0997086	0.607419	-0.0828267	0.268597	non-leukemia-specific dropout
MIR4729	1	0	0.788136	0.0287783	1.28304	0.0194244	NA	NA	NA	NA	NA
MIR4767	1	0	0.0508045	0.898274	0.994645	0.0203533	0.121946	0.8482	NA	NA	NA
DNM3OS	1	0	-2.65067	4.94899e-13	1.30173	7.52982e-14	-0.220837	0.685171	-1.82473	3.40074e-10	NA
CEP295NL	1	0	0.989916	0.00329213	0.524208	0.047804	1.22174	0.00348958	1.43695	3.2684e-08	NA
IL18BP	2	0	0.267231	0.000714833	0.427646	8.70285e-06	0.181667	0.396659	0.226199	0.0596948	non-dropout
DPP3	13	0	0.139034	0.0959956	0.266514	0.00716313	-0.285658	0.181076	0.307439	0.00133687	non-dropout
SNUPN	2	0	0.0757868	0.42951	0.204449	0.0402039	-0.0486926	0.848596	-0.927454	1.09596e-21	non-leukemia-specific dropout
ATP9A	3	0	-1.28078	8.37622e-06	0.785219	0.00137205	1.49158	0.0116177	NA	NA	non-dropout
GPC6	1	0	-1.02749	2.44891e-11	-0.42663	0.00578427	0.38864	0.0918248	0.46776	6.33925e-06	non-dropout
PQBP1	10	0	-0.0609132	0.642801	0.317399	0.00438711	-0.51436	0.0300844	1.50773	7.51039e-46	non-leukemia-specific dropout
MIR5190	1	0	NA	NA	2.28144	1.67635e-05	NA	NA	NA	NA	NA
EDIL3	7	0	-0.927426	0.00211441	1.12932	0.000210679	1.46588	5.77291e-05	NA	NA	non-dropout
DLEU7-AS1	1	0	NA	NA	2.95259	7.4019e-12	NA	NA	NA	NA	NA
UST	11	0	0.452317	2.68348e-06	1.38225	2.45244e-30	2.04904	3.97509e-20	0.222562	0.127535	non-dropout
ARPC5	18	0	-0.0829547	0.274504	-0.259316	0.00195335	0.187986	0.314802	-0.204453	0.00459249	non-dropout
ACTR3	13	0	0.138495	0.0234172	-0.171822	0.0246957	0.0166399	0.944243	-1.03465	1.56823e-86	non-leukemia-specific dropout
NAMA	1	0	-0.329871	0.36391	1.12033	0.0188918	NA	NA	NA	NA	NA
KIF20A	19	0	-0.650765	1.7386e-18	-0.313849	1.79481e-05	-0.184932	0.366067	0.41611	4.84696e-09	non-dropout
HIPK3	31	0	-0.678178	1.21282e-26	-0.31157	9.57731e-07	-0.420772	0.00936641	-0.227331	4.3134e-05	non-dropout
FEM1B	6	0	-0.191529	0.00138332	-0.19428	0.0040081	-0.0694224	0.733171	0.0657746	0.276453	non-dropout
RASGRP1	1	0	0.0217862	0.831041	0.601164	1.32728e-15	0.356135	0.0359213	-0.929708	2.50611e-31	non-dropout
LRPPRC	18	0	0.115298	0.0642075	-0.179646	0.0289079	-0.0186156	0.936245	0.258962	4.16514e-06	non-leukemia-specific dropout
FRY	31	0	0.0684462	0.471097	1.51801	6.30379e-66	1.25373	4.40925e-13	0.370367	0.00294058	non-dropout
TRAP1	7	0	0.292753	3.9052e-05	0.380766	3.99651e-05	-0.099	0.664382	0.166981	0.0849364	non-dropout
NAMPT	9	0	0.201178	0.0184869	-0.333304	0.000465008	0.116329	0.610542	1.1181	3.33278e-70	AF4 & AF9
RBM12	15	0	-0.0549209	0.419333	-0.136699	0.0306961	-0.0717206	0.714599	0.113465	0.0429788	non-dropout
TOB1	2	0	-0.159048	0.0311991	0.568166	1.33858e-06	0.045583	0.841592	2.12278	4.22822e-236	non-dropout
AKAP9	14	0	0.12199	0.0980843	0.239697	0.0279011	0.332718	0.0977253	-0.0156516	0.84279	non-dropout
FAM13A	12	0	0.142333	0.457938	-0.47241	0.00646821	0.393428	0.189804	-0.0689889	0.693267	non-dropout
SUGP2	7	0	-0.000398382	0.996182	0.168523	0.0134014	0.157436	0.373565	-0.14895	0.025709	non-dropout
ABI2	10	0	-0.043077	0.677695	-0.488912	8.71568e-06	0.0726348	0.783941	-0.456468	1.46851e-10	non-dropout
CEBPZ	4	0	-0.0296677	0.762076	-0.304725	8.47146e-05	-0.00403593	0.988094	0.425884	1.29063e-14	non-dropout
PLXNC1	19	0	-1.21276	2.22113e-45	1.32549	3.03447e-74	-1.00572	1.08885e-10	-0.0508414	0.561812	non-dropout
AASS	1	0	-0.0463814	0.63084	-0.415478	1.33375e-05	-0.0203411	0.940912	0.620759	1.03174e-20	non-dropout
FARP1	3	0	0.309424	0.000188435	0.802593	2.42196e-21	0.753839	3.55879e-05	0.200579	0.0318308	non-dropout
WASF2	47	0	0.0370478	0.596798	0.19614	0.0159308	0.0783383	0.693541	-0.446632	7.07906e-11	non-dropout
ZNF197	2	0	0.11964	0.142394	-0.277316	0.000953074	0.184771	0.35803	0.465021	1.82572e-14	non-dropout
SERF2	24	0	-0.114562	0.127169	0.218734	0.00367486	-0.153754	0.428746	0.212727	0.00218501	non-dropout
CDK2	19	0	0.0668658	0.472828	-0.375761	1.85352e-05	-0.199587	0.291889	0.44537	5.23945e-11	non-dropout
CNIH1	5	0	-0.217773	0.0103834	-0.31334	0.00191388	-0.162198	0.444868	0.112135	0.122266	non-dropout
RBM6	9	0	0.119936	0.0618431	0.279941	0.00256611	0.313814	0.0640827	0.21699	0.00142234	non-dropout
RBM5	11	0	0.00627507	0.936027	0.152102	0.0269516	0.115923	0.522875	-0.232321	4.13248e-05	non-dropout
LHFPL2	8	0	-0.513818	0.0574536	1.02358	9.85114e-05	2.28894	4.11907e-10	0.297959	0.386998	non-dropout
TNK2	1	0	0.272653	3.26106e-05	0.327408	0.000272925	0.133882	0.532599	-0.912165	8.86686e-16	non-dropout
CDK4	28	0	-0.0283631	0.734812	-0.314033	2.08904e-05	-0.514159	0.00139647	-0.297371	7.94353e-06	non-dropout
LINC01237	1	0	-0.0558306	0.887364	0.866421	0.00138937	0.224265	0.600286	-0.241365	0.445666	NA
CHN2	1	0	-0.00946065	0.957343	0.80067	2.12056e-06	0.1325	0.731761	0.0146044	0.948683	non-dropout
LINCR-0001	1	0	0.521925	0.118548	1.12323	0.000227405	0.614209	0.216359	0.553968	0.124977	NA
LAMP5-AS1	1	0	-1.54051	6.56457e-41	-0.365297	0.0159135	-0.584297	0.0179249	-1.26789	1.70029e-14	NA
LINC01215	1	0	0.596886	1.11247e-10	0.589311	4.56203e-11	0.75018	7.95124e-06	0.222656	0.0122699	NA
RNF41	7	0	-0.0284347	0.764545	-0.378078	2.62847e-07	0.16964	0.360031	0.278145	0.000163451	non-dropout
RNVU1-19	1	0	0.30373	0.163597	0.604724	0.00778837	-0.579972	0.0441965	0.739145	1.25007e-06	NA
PRMT3	1	0	-0.0795119	0.392152	-0.197389	0.0270039	-0.0515531	0.817046	-0.391679	2.17816e-07	non-dropout
ADAM10	32	0	-0.258865	0.000971235	-0.237863	0.00123334	0.147078	0.425348	-0.0925326	0.101523	non-dropout
MPHOSPH6	4	0	0.104004	0.374481	-0.278912	0.0286895	0.162491	0.493926	0.289931	0.0012957	non-dropout
TOPORS	9	0	-0.064426	0.385624	-0.401123	9.15915e-10	-0.232079	0.20146	0.397189	4.26771e-12	non-dropout
FLOT1	10	0	0.0382744	0.758197	0.387036	3.95268e-05	-0.224729	0.31373	-1.36944	8.24622e-44	non-dropout
GDF11	6	0	0.347701	1.5492e-05	0.740217	7.62996e-18	0.074492	0.733171	1.30502	3.31743e-55	non-dropout
TRIB1	18	0	-0.603548	2.65401e-13	0.811346	1.23786e-18	-0.0792926	0.70534	0.138032	0.0447236	non-dropout
LINC01108	1	0	-0.155628	0.214401	0.334507	0.0164542	-0.931515	0.000163363	NA	NA	NA
ZNF443	3	0	-0.110248	0.392303	-0.58607	6.85701e-17	-0.784041	5.0137e-07	-0.898215	3.80304e-53	non-dropout
STX6	14	0	0.347881	1.15542e-09	0.229193	0.00110552	0.287522	0.0989207	-0.299538	2.5835e-05	non-dropout
RASGRP2	13	0	0.242124	0.00762518	0.761824	1.10501e-09	0.934161	8.35417e-08	-1.80847	9.07705e-42	non-dropout
HNRNPR	38	0	-0.0509315	0.484023	-0.327283	9.70385e-05	0.245022	0.178323	-0.250147	5.99829e-06	non-dropout
RABEPK	4	0	-0.114789	0.296138	-0.301268	0.0450757	-0.11259	0.672068	0.180441	0.165224	non-dropout
POP7	2	0	-0.209061	0.0429987	-0.254364	0.0398704	-0.646274	0.000317883	0.196751	0.0506823	non-dropout
SPRY3	7	0	0.332063	0.0994394	0.466288	0.0207058	0.567602	0.116935	-0.347	0.141901	non-dropout
SPRY1	1	0	-0.132983	0.164244	0.990021	7.37802e-23	-0.915696	2.81635e-08	-1.5236	3.68865e-49	non-dropout
SPRY2	59	0	-0.696077	1.5186e-31	-0.582293	5.99383e-12	-0.834395	7.81262e-09	-0.292691	8.04434e-07	non-dropout
CDKN1A	9	0	-0.459339	1.96553e-12	-0.589202	4.51601e-13	-0.313717	0.0572697	0.516313	3.79928e-18	non-dropout
ZMPSTE24	16	0	0.0887562	0.27728	-0.305145	0.000156171	0.0452613	0.843167	-0.210374	0.0108291	non-dropout
FSTL3	3	0	-0.300195	0.00973778	0.376985	0.0207174	-0.516664	0.0723278	-0.786438	0.000137934	non-dropout
STAG1	35	0	0.0651191	0.372846	-0.154729	0.03879	0.160035	0.370209	0.322801	9.62505e-08	non-dropout
NET1	15	0	-0.159114	0.0265239	-0.330999	2.05052e-05	-0.0973718	0.643218	0.00873953	0.910579	non-dropout
UBE4B	21	0	0.37341	5.90412e-09	0.303	2.40732e-05	0.143224	0.462253	0.178628	0.040566	non-dropout
SMNDC1	18	0	0.104921	0.175268	-0.254959	0.00149835	-0.137238	0.488315	0.13816	0.0373001	non-leukemia-specific dropout
BCAS2	3	0	-0.0419506	0.731987	-0.266954	0.009048	-0.130136	0.552077	0.559425	8.85255e-12	non-leukemia-specific dropout
LILRB2	2	0	-0.345543	0.0431156	-0.866008	0.00548991	1.28401	0.000706133	-2.85522	6.53811e-17	non-dropout
TRAIP	7	0	-0.0521755	0.604706	-0.287602	0.00915223	-0.320233	0.099458	0.81956	6.14124e-22	non-dropout
BCKDK	8	0	-0.236628	0.00606032	0.34806	0.00218089	-0.281635	0.250371	-0.307977	0.0108692	non-dropout
APC2	2	0	0.23397	0.377763	1.31243	1.02862e-12	0.172055	0.699917	0.870292	0.00138677	non-dropout
KATNB1	12	0	0.102044	0.343337	-0.384687	0.00116986	-0.750122	8.08837e-05	-0.368433	0.000217645	non-dropout
LANCL1	8	0	0.12305	0.133935	-0.407288	1.17135e-06	-0.0712739	0.747768	-0.382166	1.42e-06	non-dropout
AKR1A1	7	0	-0.316388	2.44903e-05	0.41844	8.07795e-10	-0.513156	0.000971218	-0.770367	9.92967e-25	non-dropout
CDKN3	7	0	-0.479804	1.0388e-06	-0.338613	0.000714477	-0.0777008	0.805393	0.890893	1.16994e-17	non-dropout
TFG	15	0	0.0766118	0.326267	-0.29764	0.000103142	-0.0753084	0.720401	-0.417021	2.14091e-11	non-dropout
NPM2	12	0	NA	NA	1.34323	2.37002e-10	-0.396386	0.469887	-1.48457	9.82589e-06	non-dropout
CITED2	13	0	-0.396282	1.21741e-08	0.861001	2.061e-19	-0.189627	0.379741	1.35135	1.70135e-64	AF9 specific
SEMA3A	9	0	-0.269524	8.47236e-05	0.146254	0.0457394	0.0904611	0.66165	0.270759	2.15492e-06	non-dropout
IRF9	13	0	0.00400579	0.9753	0.333883	0.00213599	0.0297886	0.918461	0.374481	0.000845788	non-dropout
BTN3A3	1	0	0.113488	0.228336	0.250525	0.0210681	0.211797	0.345877	-0.781491	2.89567e-06	non-dropout
BTN2A2	1	0	0.0711036	0.433454	-0.238483	0.0144284	-0.205011	0.348943	0.0188497	0.8583	non-dropout
SCML2	4	0	0.0741974	0.53246	0.206424	0.0290615	-0.0763785	0.751839	-0.314532	0.000222484	non-dropout
CDR2	8	0	-0.465289	4.50569e-10	0.507558	1.75865e-11	-0.410018	0.0245434	1.05644	9.09518e-43	non-dropout
ATP8A1	1	0	-0.252452	2.90828e-05	0.556503	4.59997e-14	-0.176785	0.329781	0.370843	4.95526e-10	non-dropout
NDRG1	3	0	0.228092	0.000532324	0.370843	2.32749e-07	0.357705	0.0541927	1.12774	3.02272e-74	non-dropout
ADARB1	3	0	-0.375176	3.74838e-05	1.0405	6.65872e-30	0.178991	0.376521	-0.136101	0.219748	non-dropout
CDS1	7	0	NA	NA	2.07933	0.000329081	NA	NA	NA	NA	non-dropout
RAPGEF3	1	0	1.43447	2.97852e-32	2.12324	1.20434e-58	2.13217	2.09306e-22	-2.89324	1.09708e-53	non-dropout
SPON2	2	0	-1.57396	1.53285e-14	1.06585	1.91372e-09	0.0822589	0.8747	-0.807067	0.00417192	non-dropout
TESK2	16	0	0.279869	0.113653	0.541464	0.00026402	0.336111	0.302766	1.17408	2.09905e-12	non-dropout
PGRMC2	9	0	0.0857122	0.340658	-0.18518	0.0426115	-0.213345	0.266202	0.387298	1.68172e-07	non-dropout
CD52	9	0	0.143778	0.48046	0.838333	0.0138129	1.82492	3.51754e-11	-1.69408	6.48045e-14	non-dropout
RBM14	16	0	-0.0760597	0.280844	-0.185844	0.0304686	0.0741871	0.707002	1.10214	4.74466e-56	non-leukemia-specific dropout
IFI30	4	0	0.799349	1.82635e-21	-0.964577	2.11496e-13	0.751179	0.0001486	0.816789	1.09597e-15	non-dropout
TIMM17A	9	0	0.0893958	0.322842	-0.193719	0.0289039	-0.300126	0.100386	0.431601	4.9086e-10	non-dropout
ZER1	16	0	-0.0296973	0.741139	0.257059	0.0383571	0.240565	0.263161	0.184495	0.147661	non-dropout
FAM3C	16	0	0.0699806	0.673303	0.376299	0.000621055	0.11771	0.646805	0.718469	4.24826e-18	non-dropout
ACAA2	7	0	0.224148	0.00585736	-0.213091	0.0276952	0.0171633	0.949862	0.10979	0.231387	non-dropout
VAV3	9	0	-1.15092	8.31452e-50	0.393847	6.05798e-08	-0.194299	0.369318	0.206677	0.00472664	non-dropout
ECI2	3	0	0.601813	3.34103e-09	0.347419	0.00256146	0.255621	0.267945	0.384861	0.00193096	non-dropout
MAD2L2	6	0	0.239434	0.0214205	0.35092	0.00145811	-0.148481	0.54474	-0.323833	0.000692829	non-leukemia-specific dropout
PPIH	14	0	-0.0688976	0.54771	-0.343936	0.000108949	-0.203834	0.32649	-0.213127	0.0345088	non-dropout
TIMM44	5	0	-0.298971	0.000111657	-0.379002	0.000133897	-0.270437	0.150022	-0.0465587	0.599511	non-dropout
HMGN4	4	0	-0.0234764	0.803603	-0.418443	3.23726e-05	-0.209183	0.297393	-0.0574639	0.523484	AF9 specific
TADA3	6	0	0.0456543	0.711248	0.367654	0.0010902	0.182379	0.42054	-0.695329	1.47823e-10	non-dropout
TRIM38	5	0	0.0896335	0.182783	0.486594	1.76515e-14	0.485839	0.00201668	0.145247	0.0185573	non-dropout
UBE2E3	4	0	0.122737	0.218324	-0.361133	5.93619e-05	0.0728858	0.755134	-0.839087	5.18676e-16	non-dropout
SLC25A17	6	0	0.0657456	0.489669	-0.31503	0.00309007	0.0855458	0.732952	0.183374	0.105353	non-dropout
CAP2	3	0	0.177051	0.617406	1.58446	9.698e-12	2.63764	1.04375e-08	0.596438	0.11055	non-dropout
CAP1	23	0	-0.18562	0.00196983	-0.167008	0.024537	-0.239377	0.155307	-0.360721	1.13918e-10	non-dropout
CRTAP	7	0	0.228829	0.000822322	-0.208595	0.0196092	-0.15902	0.438725	-0.289116	8.49116e-05	non-dropout
SYNCRIP	54	0	-0.0502867	0.46429	-0.237744	0.000546519	0.0419267	0.84216	-0.362207	2.00941e-11	non-leukemia-specific dropout
VAT1	3	0	0.829367	4.80483e-16	-0.617426	9.22089e-10	0.255118	0.293248	0.482516	8.24992e-05	non-dropout
UNC13B	6	0	-0.19896	0.00601798	-0.452973	2.15341e-09	-0.687556	4.81753e-05	0.398217	7.8565e-07	non-dropout
CARM1	11	0	-0.019542	0.836325	0.249736	0.00305776	-0.370666	0.0335169	-1.15002	1.48205e-32	non-dropout
NCOA2	26	0	0.11694	0.0630324	0.363665	6.18727e-08	0.167558	0.35558	0.278286	2.39535e-06	non-dropout
ADARB2	1	0	-0.111808	0.374861	0.752913	2.04168e-07	0.578394	0.0463712	-0.448742	0.0106488	non-dropout
SEMA4F	8	0	0.250168	0.0191922	0.289136	0.0159998	0.0197458	0.949099	1.06778	1.79228e-16	non-dropout
SEMA4D	1	0	0.696836	2.63619e-22	0.290546	0.000519015	0.0760691	0.717397	-0.576469	4.09628e-16	non-dropout
CIB1	18	0	0.385779	0.000533977	0.276269	0.0267826	-0.439963	0.0261472	0.336689	0.000109094	non-dropout
KAT5	10	0	0.107737	0.190717	0.207036	0.0194385	-0.266164	0.158271	-0.649244	4.78202e-16	non-dropout
IPO7	11	0	-0.058842	0.403089	-0.340199	5.75924e-08	0.00217133	0.993054	0.468322	8.22089e-20	non-dropout
NOP56	2	0	-0.306925	4.64139e-08	-0.184145	0.00831388	-0.611528	0.000106053	0.574706	3.32932e-26	non-leukemia-specific dropout
NEBL	10	0	NA	NA	3.56531	2.14006e-08	NA	NA	NA	NA	non-dropout
RNASEH2A	13	0	-0.22612	0.015355	-0.324652	0.0175081	-0.160222	0.495154	0.581255	2.61683e-05	non-leukemia-specific dropout
DCTN2	4	0	0.0653322	0.584348	-0.240672	0.00783832	-0.126626	0.555396	-0.796063	8.27943e-19	non-dropout
ANP32B	12	0	-0.20329	0.000411923	-0.268612	0.000416071	-0.206772	0.219255	-1.12552	1.24493e-82	non-dropout
ARL6IP5	17	0	0.253371	0.0365784	0.305543	0.00301588	0.106174	0.67607	-1.14879	2.13703e-19	non-dropout
RPP30	4	0	0.224829	0.00777979	-0.241328	0.0100647	0.131946	0.532599	-0.0177057	0.849777	non-dropout
SLC19A2	3	0	-0.285653	0.00092039	-0.341472	0.000384586	-0.0560455	0.826635	1.0903	4.32344e-55	non-dropout
ARFGEF1	17	0	-0.0271458	0.760992	0.322309	5.28092e-05	0.204853	0.252517	-0.180284	0.00655236	non-dropout
RABAC1	4	0	-0.078139	0.703221	0.413772	0.0326196	-0.0600499	0.894142	0.127338	0.658121	non-dropout
SIVA1	10	0	-0.0404097	0.773957	-0.202102	0.033724	-0.338838	0.138031	0.226246	0.0211293	non-dropout
CCT7	16	0	-0.140366	0.0379042	-0.279972	0.000308432	-0.408412	0.0148408	0.412294	1.20545e-12	non-leukemia-specific dropout
CCT4	12	0	-0.0746751	0.292107	-0.292216	0.000183854	-0.347376	0.0394023	0.236125	4.12819e-05	non-leukemia-specific dropout
CCT2	3	0	-0.0660371	0.333959	-0.145755	0.0350338	-0.351927	0.0267145	0.377367	1.94086e-11	AF9 specific
TACC2	7	0	1.70338	2.2238e-08	1.38706	2.63942e-08	2.06012	3.21285e-06	NA	NA	non-dropout
CENPA	3	0	-0.684872	2.42743e-18	-0.399557	4.4345e-05	-0.107053	0.641896	0.0902996	0.379745	non-leukemia-specific dropout
SORBS1	2	0	0.55403	1.80551e-10	0.934823	1.92923e-36	0.820915	5.1794e-06	0.447816	1.79842e-07	non-dropout
IFITM2	3	0	0.0943923	0.360703	-0.355724	0.00010491	-0.270439	0.178002	-0.971274	2.22055e-20	non-dropout
POMT1	4	0	0.109982	0.495707	1.18702	1.81014e-06	0.10784	0.803156	2.20773	1.28827e-18	non-dropout
TXNRD2	2	0	-0.0202768	0.861896	0.264195	0.0159812	-0.00610716	0.98368	-0.230576	0.0868426	non-dropout
SMC2	7	0	-0.178923	0.0448039	-0.482369	6.89156e-09	0.170164	0.411289	-0.0710315	0.220664	non-dropout
CDC42EP3	18	0	-0.362272	5.28598e-11	-0.46973	1.88398e-09	-0.0569274	0.782816	-1.36322	4.70027e-128	non-dropout
PAICS	16	0	-0.162661	0.0129748	-0.24303	0.000720013	-0.137883	0.460794	-0.295178	2.12867e-07	non-leukemia-specific dropout
MXD4	39	0	0.220302	0.0157201	1.05029	1.14164e-26	-0.476558	0.0269194	0.717542	4.90691e-13	non-dropout
ERLIN1	17	0	0.0916999	0.244317	0.245533	0.00110727	0.0394268	0.863171	-0.205636	0.0107274	non-dropout
HEXIM1	12	0	0.339911	5.4604e-06	-0.445965	1.14768e-05	-0.257632	0.215591	2.56858	0	non-dropout
CENPE	1	0	-0.525411	2.37813e-06	-0.376244	0.00326657	0.223347	0.375888	-0.0563257	0.421599	non-leukemia-specific dropout
ARID3B	5	0	0.36656	3.30459e-05	-0.612421	3.10445e-14	-0.5206	0.00149799	0.0162909	0.82567	non-dropout
POLR3G	3	0	-0.213761	0.0972015	-0.422919	0.00243108	-0.0899447	0.756172	0.663524	4.23513e-14	non-dropout
IVNS1ABP	22	0	0.0852726	0.177148	-0.336256	3.15023e-09	-0.0330306	0.875556	0.17814	0.00129579	non-dropout
TAF6L	2	0	0.142336	0.0933056	-0.627664	7.73085e-09	-0.305	0.167096	0.182985	0.0786884	AF9 specific
CENPF	16	0	-0.282244	0.000392218	-0.305744	0.000677407	0.327756	0.0750644	-0.136514	0.0127957	non-dropout
PDPN	2	0	-0.0103593	0.964877	3.10763	1.26738e-40	0.530695	0.324406	-0.640114	0.0226103	non-dropout
RAD51AP1	10	0	-0.119633	0.316955	-0.354308	8.00279e-05	0.169511	0.452126	-0.377942	3.44613e-09	AF4 specific
IGF2BP2	4	0	0.254749	0.630843	2.18505	0.0011515	NA	NA	NA	NA	non-dropout
KHDRBS3	7	0	0.115891	0.382518	0.937224	1.22958e-24	-0.21578	0.325513	0.706975	1.78931e-11	non-dropout
KHDRBS1	35	0	0.053482	0.472274	-0.189815	0.00307149	0.0060755	0.979795	0.15493	0.00570581	non-dropout
CELF2	29	0	-0.18643	0.00130889	0.151613	0.0207164	-0.213021	0.199314	0.0331963	0.579801	non-dropout
GNA13	7	0	0.0935632	0.155754	0.193122	0.00879767	0.181736	0.293052	-0.675691	1.02234e-26	non-dropout
EBP	3	0	-0.25494	0.0055945	-0.336252	0.00420846	-0.517941	0.0038145	0.701421	5.61404e-14	non-dropout
CCT8	2	0	-0.136702	0.0252728	-0.229491	0.000944561	-0.239417	0.156488	0.0321332	0.620493	non-dropout
CNPY3	6	0	0.0216447	0.803603	0.187388	0.0100303	0.127979	0.495603	-0.466399	3.2982e-11	non-dropout
CETN3	7	0	-0.444503	2.48226e-05	-0.397627	0.00590033	0.238932	0.393807	-0.15576	0.327364	non-dropout
USP39	8	0	0.0131249	0.883348	-0.168069	0.0273144	-0.277357	0.101971	0.275639	1.16421e-05	non-dropout
POLD3	3	0	-0.168902	0.0250136	-0.415846	3.99917e-07	0.130856	0.486618	-0.526534	7.67114e-12	non-leukemia-specific dropout
AP4B1	3	0	0.361471	8.16624e-08	-0.282746	0.00270708	0.0382855	0.874809	0.00525439	0.958117	non-dropout
NRG3	1	0	NA	NA	2.0301	1.06765e-10	3.02749	6.66297e-11	NA	NA	non-dropout
POLQ	10	0	-0.0786404	0.359389	-0.389393	5.35764e-08	0.230327	0.194416	0.0121803	0.879495	non-dropout
SLC12A7	1	0	0.263168	0.00303666	0.54946	2.27553e-11	-0.0437444	0.863405	-0.161661	0.0391923	non-dropout
NFAT5	16	0	0.186947	0.0255266	1.13444	7.86191e-42	0.419089	0.0216985	0.415664	2.63387e-10	non-dropout
PTGES3	22	0	-0.0502563	0.487401	-0.264855	3.00997e-05	-0.251362	0.124924	0.0772875	0.181648	non-dropout
YME1L1	12	0	0.0455197	0.554522	-0.233982	0.00218218	0.172079	0.385416	0.0633691	0.285663	non-dropout
PLK4	11	0	-0.287176	8.7732e-05	-0.463776	1.29512e-12	-0.0174295	0.947905	-0.565609	4.51117e-22	non-leukemia-specific dropout
STAG2	14	0	-0.0447913	0.589655	-0.263887	0.00044338	-0.0504509	0.813329	-0.561898	1.40126e-24	AF9 specific
RBBP9	1	0	-0.0592063	0.733116	-0.423956	0.00394376	0.0496792	0.884534	-0.265744	0.087987	non-dropout
RAI1	5	0	-0.05019	0.53102	-0.218407	0.0177571	-0.706195	1.03894e-05	-0.312258	6.07906e-05	non-dropout
PTTG2	1	0	0.0223422	0.936145	0.868091	0.000729119	1.23352	0.00058761	-0.462768	0.217475	non-dropout
KIF1C	1	0	0.0216833	0.836234	0.339619	0.00363898	-0.139225	0.530797	0.127219	0.210526	non-dropout
TRAF3IP2	21	0	0.0285527	0.806305	0.684614	9.07018e-22	-0.165779	0.393555	-1.50974	1.00016e-62	non-dropout
NUP50	13	0	-0.204276	0.000636323	-0.258345	3.42748e-05	-0.00560635	0.981694	-0.455578	1.46539e-16	non-dropout
KDM5B	17	0	0.70469	0.000256153	3.20315	1.69189e-09	NA	NA	NA	NA	non-dropout
HBS1L	10	0	0.20584	0.0189743	-0.189241	0.0411879	0.252329	0.210055	-0.0306661	0.665126	non-dropout
AHCYL1	16	0	-0.0946198	0.205392	-0.415756	1.60316e-09	0.0412627	0.84513	-0.0788331	0.348935	non-leukemia-specific dropout
SRSF10	30	0	-0.128834	0.0610117	-0.295337	3.84828e-05	0.0844976	0.676037	0.0264679	0.663609	non-dropout
ARPP19	16	0	0.000795604	0.992562	-0.341024	1.60336e-06	0.0700815	0.738813	-0.219476	7.87187e-05	non-dropout
ZNF234	5	0	0.0211236	0.865151	-0.232847	0.0308468	0.10826	0.653668	-0.0512206	0.676903	non-dropout
NCKAP1	3	0	NA	NA	2.59727	5.92078e-46	0.16367	0.756436	-0.462774	0.0245826	non-dropout
IQGAP2	19	0	0.0478042	0.617519	-0.604376	2.03514e-14	0.112726	0.61545	0.26426	0.000312793	non-dropout
ZNF273	3	0	-0.00503699	0.973884	-0.336617	0.000376429	0.12642	0.607063	0.27231	4.71313e-05	non-dropout
ZNF460	5	0	0.0510848	0.46318	-0.237292	0.00154482	-0.0530605	0.79246	-0.306929	2.59565e-07	non-dropout
MTHFD2	5	0	-0.362908	2.02589e-10	-0.667115	1.3278e-25	-0.167327	0.336345	0.557134	5.02082e-23	non-dropout
CYSLTR1	6	0	-0.799845	2.06563e-12	-0.763503	2.59826e-05	0.227634	0.50478	-1.0796	2.54243e-09	non-dropout
HSPH1	16	0	-0.157491	0.0900433	-0.352927	2.05927e-06	-0.0106034	0.968685	0.700193	3.05222e-34	non-dropout
WASF3	1	0	0.0590942	0.603524	0.458225	5.73382e-08	0.390435	0.0456112	0.0254366	0.799351	non-dropout
NEU3	1	0	0.290009	0.000773862	0.527959	6.47313e-14	-0.0692966	0.761838	0.619569	7.36649e-18	non-dropout
PDE10A	1	0	0.157165	0.612465	0.780649	9.01239e-05	2.17113	1.92814e-13	0.164918	0.492632	non-dropout
CD3EAP	5	0	-0.274794	0.00226612	-0.473942	0.000124726	-0.504892	0.00428182	0.422193	9.00873e-08	non-dropout
PGRMC1	2	0	-0.050923	0.677783	-0.345525	0.000687088	-0.441652	0.0195881	1.1585	1.88432e-58	non-dropout
ADAM28	1	0	0.831033	7.85749e-25	-0.750544	1.26396e-12	1.2605	5.01814e-12	-0.859015	1.61606e-16	non-dropout
ARID5A	8	0	-0.491692	8.78686e-16	0.405658	1.58004e-06	-0.765922	1.90606e-06	0.699288	1.92806e-27	non-dropout
HCP5	2	0	-0.522337	4.11881e-09	-0.256807	0.0235158	0.188222	0.385081	0.907597	7.08028e-21	NA
CD300C	3	0	0.391852	0.152661	1.05023	0.0107407	1.14583	0.00422239	-3.42513	1.6454e-23	non-dropout
ME3	2	0	0.227128	0.0634882	0.553575	1.27679e-07	0.325341	0.0984707	0.274371	0.0202788	non-dropout
WDR3	7	0	-0.150929	0.038367	-0.262033	0.000190035	-0.0208459	0.929363	0.14258	0.0201927	non-leukemia-specific dropout
RAB10	4	0	-0.213019	0.00332041	-0.213878	0.012243	-0.0798138	0.707699	0.388071	1.98087e-07	non-leukemia-specific dropout
PPARGC1A	3	0	1.28978	2.34206e-05	1.44519	0.001152	NA	NA	NA	NA	non-dropout
MALT1	14	0	-0.164784	0.0309597	-0.338381	5.2603e-05	-0.073285	0.749288	-0.239563	0.00261637	non-dropout
OCLM	1	0	0.303099	0.125087	-0.531295	0.0368459	1.00978	0.00209898	0.205009	0.20694	non-dropout
ADCY3	6	0	-0.207216	0.00140103	0.177925	0.0391243	-0.246979	0.173504	-0.319328	1.29966e-05	non-dropout
PNPLA6	20	0	0.156133	0.0878896	0.39326	0.00609362	-0.0866643	0.750666	-0.499739	0.00141724	non-dropout
SUGT1	4	0	0.0464742	0.766242	-0.361712	0.00449365	0.208141	0.451857	0.938561	3.31481e-21	non-dropout
PAPOLA	11	0	0.0492434	0.560963	-0.165897	0.0456689	0.241811	0.178242	0.135262	0.0179268	non-dropout
TCERG1	13	0	0.0161671	0.84345	-0.170853	0.0211732	0.0523094	0.80293	-1.06907	1.69078e-76	non-dropout
RNPS1	19	0	-0.181496	0.00998484	-0.192407	0.015153	-0.409322	0.00965364	0.192596	0.00434277	non-dropout
SUB1	17	0	0.066604	0.461064	-0.307864	0.00036941	-0.15469	0.422797	0.0796707	0.214333	non-dropout
DBF4	1	0	-0.309371	0.00176146	-0.204925	0.0342932	-0.217909	0.27502	0.407464	3.2201e-12	non-dropout
MORF4L1	15	0	0.0195549	0.83051	-0.168855	0.0456971	0.282758	0.1155	-0.202068	0.00478162	non-dropout
EHD1	13	0	0.568456	2.19326e-17	0.434812	0.00106124	0.250706	0.228503	1.8512	4.69317e-127	non-dropout
POP1	14	0	-0.11486	0.314953	-0.479868	7.90097e-06	-0.101303	0.656089	0.171398	0.0274067	non-leukemia-specific dropout
AP3M2	1	0	-0.0922585	0.267208	-0.226623	0.0041752	0.0725818	0.733241	0.582799	4.63078e-19	non-dropout
HNRNPA0	17	0	0.0438909	0.552758	-0.179075	0.0494175	-0.388654	0.0139992	-0.0408654	0.548304	non-dropout
BTG3	2	0	-0.34278	2.33065e-07	-0.371168	9.60925e-07	-0.347902	0.0454213	-0.0635459	0.333515	non-dropout
PDIA5	6	0	-0.0279856	0.894709	0.514433	0.000139876	0.327751	0.208266	-0.457502	0.000960321	non-dropout
PNRC1	9	0	0.0888666	0.258661	0.357567	1.11591e-05	-0.00384854	0.987862	1.28187	9.41873e-96	non-dropout
TMED2	3	0	-0.0410926	0.638123	-0.216428	0.0195063	-0.404548	0.0129891	0.239769	0.000168821	non-dropout
LMAN2	13	0	0.0240059	0.806131	0.199863	0.0300928	-0.253961	0.20379	0.132379	0.165396	non-dropout
MLLT11	2	0	1.72798	1.72075e-28	-0.749593	6.71044e-07	-0.485454	0.0844616	-0.422805	0.000560191	non-dropout
RAB40B	2	0	0.520527	1.16214e-06	0.460013	0.0128948	0.0380676	0.929363	0.208327	0.456992	non-dropout
CKAP4	4	0	0.137005	0.12627	0.661774	2.18903e-10	0.397963	0.0399505	-0.616501	1.29909e-10	non-dropout
YWHAQ	15	0	-0.0158957	0.844218	-0.221875	0.00112952	-0.208248	0.21524	0.163166	0.00411626	non-dropout
FERMT2	21	0	-0.423318	2.13304e-06	-0.643594	1.31154e-05	0.405848	0.128757	-0.704189	2.70331e-10	non-dropout
COPS6	3	0	-0.169947	0.104342	0.255351	0.022539	-0.401381	0.0394692	-0.201624	0.0501243	non-leukemia-specific dropout
RAB32	2	0	NA	NA	0.911842	0.00914091	1.58964	0.00348067	NA	NA	non-dropout
KCNQ1OT1	1	0	0.0743706	0.340336	0.395874	6.66981e-08	0.888355	2.23848e-10	0.741158	3.99728e-36	NA
GCN1	5	0	0.0237726	0.787809	0.231613	0.00126075	-0.184433	0.335748	0.105143	0.0936814	NA
METAP2	3	0	0.098918	0.221117	-0.225573	0.00549941	0.107049	0.600997	0.231156	9.35338e-05	non-dropout
IMMT	8	0	0.0851343	0.204503	-0.169279	0.016985	0.0219981	0.923681	0.23592	9.88822e-05	non-dropout
SLC27A2	3	0	-0.972063	5.78832e-17	1.17444	4.80216e-34	-0.394183	0.0692185	-1.55922	3.62366e-16	non-dropout
KIF2C	13	0	-0.143484	0.0399593	-0.289537	9.15004e-05	-0.159659	0.394556	0.537131	1.90947e-18	non-dropout
LILRB4	3	0	1.29652	4.39919e-09	2.16894	1.92262e-16	3.96629	2.30057e-28	NA	NA	non-dropout
GLIPR1	8	0	0.568701	7.43055e-07	-0.902309	3.5686e-13	1.13132	3.34366e-11	-1.25096	1.74837e-59	non-dropout
ATF7	23	0	-0.0677341	0.356067	0.467759	1.09989e-11	0.157692	0.384119	0.364704	6.81803e-08	non-dropout
LIAS	8	0	0.149816	0.226088	-0.2764	0.0164473	0.242491	0.288203	0.0180374	0.867687	non-leukemia-specific dropout
RCBTB2	8	0	-0.510589	2.52943e-12	0.24236	0.00378545	0.0740851	0.750827	-0.529913	3.75627e-13	non-dropout
LILRA1	1	0	-0.330619	0.194931	-2.24782	7.34085e-16	1.2827	0.00015582	-3.11666	1.06726e-32	non-dropout
LILRA2	2	0	-0.370491	0.00392904	0.570986	1.16501e-08	0.601385	0.0147196	-3.9556	7.05255e-121	non-dropout
DSTN	14	0	0.0343122	0.856497	0.952579	6.34411e-10	0.3188	0.312758	0.590265	0.000583873	non-dropout
RIPK3	3	0	0.0998198	0.656662	1.75788	1.09178e-08	-0.00398501	0.995956	NA	NA	non-dropout
STON1	1	0	0.404433	0.000415199	0.527006	9.86718e-06	0.482271	0.0784413	-0.272699	0.0486414	non-dropout
RCC1	7	0	-0.257842	2.94566e-05	-0.180811	0.0310831	-0.268058	0.114904	-0.195808	0.00232693	non-leukemia-specific dropout
PIM2	17	0	0.232896	0.0129874	0.495269	1.72798e-06	0.141878	0.572979	2.57596	1.13003e-180	non-dropout
MID2	4	0	-0.477803	0.00916418	2.07159	2.4468e-10	2.36219	1.11112e-13	-0.222678	0.400241	non-dropout
CHD1	3	0	-0.00129806	0.988935	-0.469836	2.8741e-10	0.123762	0.555588	-0.401447	1.17648e-12	non-dropout
NUDT21	10	0	-0.00650289	0.949205	-0.239585	0.00204269	-0.0599474	0.769647	0.007454	0.912847	non-leukemia-specific dropout
CPSF6	18	0	-0.0302054	0.701475	-0.326667	0.000184321	0.123059	0.540947	0.0851179	0.191777	non-dropout
CHD3	9	0	0.238179	0.00154723	0.358022	1.82407e-07	-0.169435	0.361251	-1.13072	8.55681e-40	non-dropout
TOPBP1	7	0	-0.0913989	0.188595	-0.222147	0.00114992	0.139998	0.436955	-0.668121	3.18296e-32	non-leukemia-specific dropout
CHD4	25	0	0.0123672	0.871011	0.276186	6.18933e-05	-0.0838896	0.653242	0.330096	1.92555e-10	non-leukemia-specific dropout
DIDO1	9	0	-0.136761	0.0138939	0.170191	0.0117851	-0.0793853	0.676219	-0.638939	3.3951e-25	non-dropout
ADAMTS13	1	0	0.370692	0.201722	0.645273	0.0089617	0.125752	0.811896	0.366144	0.348068	non-dropout
CACFD1	1	0	0.347874	0.00415265	0.357694	0.0157424	-0.163199	0.620974	0.475577	0.0143578	non-dropout
ATE1	23	0	0.0439594	0.672627	0.182097	0.0494402	-0.0583074	0.796997	0.0872525	0.240695	non-dropout
KATNA1	4	0	-0.171094	0.0538022	-0.330413	9.85114e-05	-0.147635	0.49211	0.358536	6.60161e-06	non-dropout
PRDM4	5	0	-0.0322316	0.697884	0.206697	0.00855296	-0.0465096	0.829828	-0.203982	0.00449888	non-dropout
CHEK1	9	0	-0.134513	0.0868996	-0.378151	4.62411e-07	0.00113873	0.996486	-0.205252	0.000725142	non-leukemia-specific dropout
FOXN3	25	0	-0.189283	0.00309927	0.270524	0.000380927	0.157116	0.4314	-0.0400606	0.598867	non-dropout
RCAN3	1	0	0.289243	0.00196466	0.467776	0.000648429	0.93293	4.20497e-05	-0.234197	0.158041	non-dropout
ZWINT	16	0	-0.110724	0.192166	-0.231229	0.00497904	-0.201954	0.273706	-0.376102	1.06482e-08	non-leukemia-specific dropout
KPTN	4	0	0.356063	0.0457105	0.392712	0.0186461	-0.202483	0.525647	-0.607177	0.00546498	non-dropout
TBC1D8	10	0	-0.174455	0.00287359	0.18766	0.00912292	-0.291361	0.0941534	0.230336	0.000411942	non-dropout
PKIG	1	0	0.0623786	0.679756	-0.334967	0.00613213	0.498227	0.0144792	-1.28448	7.93224e-22	non-dropout
HHLA3	6	0	0.160557	0.488204	0.600617	0.0196175	0.516913	0.180994	0.307403	0.295367	non-dropout
BVES	5	0	-0.245548	0.0216788	-0.438761	0.000315893	0.424372	0.033247	0.676553	6.93387e-16	non-dropout
CORO1A	6	0	-0.0826309	0.408267	-0.223571	0.0195468	-0.0769094	0.747429	0.014722	0.84302	non-dropout
WDR45	15	0	0.0427031	0.752351	0.268823	0.00845062	0.0806195	0.783329	-1.23914	1.43577e-14	non-dropout
FICD	6	0	0.0162174	0.929289	0.371763	0.0224984	-0.187664	0.533862	0.382889	0.0176968	non-dropout
AP4S1	1	0	0.331211	0.000249669	0.393599	0.001792	0.137374	0.57256	-1.00259	1.14753e-18	non-dropout
PTP4A3	1	0	0.050806	0.894657	0.406457	0.0353623	-0.101475	0.817046	-2.88258	2.19446e-34	non-dropout
LSM6	19	0	-0.0951018	0.402154	-0.293566	0.0140051	-0.252669	0.241546	0.442109	5.16752e-06	non-dropout
ERLIN2	12	0	0.175065	0.0225594	0.199929	0.0253021	0.198357	0.328327	-0.267013	0.000287026	non-dropout
NUDT5	5	0	-0.122406	0.260936	-0.225409	0.0273967	0.02242	0.932259	0.284964	0.000861458	non-dropout
PSIP1	21	0	-0.316698	7.3514e-06	-0.355099	5.47597e-06	0.111314	0.622077	0.447747	7.67081e-15	non-dropout
WDHD1	15	0	-0.0577533	0.538176	-0.42446	2.30848e-05	0.307651	0.11827	-0.217787	0.00151792	non-leukemia-specific dropout
CHI3L2	1	0	-0.409992	0.108119	-0.836164	0.00074462	0.589594	0.199737	-2.61029	5.84074e-10	non-dropout
STRAP	7	0	0.124287	0.0783833	-0.176728	0.046228	-0.235885	0.178242	0.163503	0.0160432	non-dropout
BAZ2A	11	0	0.236448	0.000288205	0.258042	0.000464373	0.0461571	0.822617	-0.411556	2.73495e-10	non-dropout
BAZ1A	18	0	0.0481456	0.508919	-0.166677	0.0375683	0.265211	0.172335	-0.0043072	0.952513	non-dropout
ZNF277	6	0	0.0929728	0.346425	-0.280606	0.0198324	-0.0265726	0.922821	-0.158526	0.0628902	non-dropout
MAP4K5	3	0	0.10555	0.177268	-0.29113	0.00164439	0.237554	0.238523	-0.399539	2.37519e-09	NA
NISCH	3	0	0.0388477	0.668907	0.17289	0.0372781	-0.212619	0.284107	-0.00693137	0.928949	non-dropout
ADCY6	10	0	-0.216843	0.000215483	-0.191336	0.0494351	-0.119117	0.563845	-1.47692	6.40599e-90	non-dropout
CHEK2	18	0	-0.459458	1.14422e-05	-0.433345	0.000317802	0.352569	0.112834	0.691286	1.03832e-12	non-dropout
POLI	5	0	0.296939	0.00921496	-0.370996	0.00199008	0.732877	0.000123743	-0.951717	1.44496e-17	non-dropout
AKAP13	16	0	0.0302031	0.661456	0.486217	1.12033e-15	0.0302691	0.886815	0.215155	6.94437e-05	non-dropout
AKAP11	22	0	0.0186457	0.875001	-0.34783	0.000156507	0.376826	0.0435091	-0.31914	4.80189e-07	non-dropout
DDX20	7	0	-0.0216361	0.795171	-0.220862	0.00114096	-0.279446	0.0990752	-0.310389	1.60275e-07	non-leukemia-specific dropout
DUSP10	15	0	0.00118581	0.990509	-0.461776	4.28925e-07	-0.442715	0.0086523	-0.2537	0.000538963	non-dropout
GALNT6	3	0	-0.446555	9.48061e-09	-0.381102	1.67471e-05	0.168776	0.399332	-1.13763	3.78189e-41	non-dropout
RASSF8	12	0	-0.496384	5.61175e-06	0.255764	0.0476082	1.48746	9.69489e-12	-0.0647707	0.697302	non-dropout
SEC63	5	0	-0.0475781	0.536838	0.220463	0.0107791	0.314991	0.0878361	-0.264206	4.51146e-06	non-dropout
HPS5	23	0	0.133246	0.0786105	-0.178805	0.0275175	0.24757	0.175136	0.219583	0.00126355	non-dropout
RNF24	6	0	0.391207	5.61877e-11	0.378085	2.93188e-06	0.476456	0.00618061	0.367178	2.57135e-05	non-dropout
CA5B	2	0	-0.0524704	0.557813	0.26584	0.00334843	0.197027	0.361733	-0.385794	0.000128935	non-dropout
CHN2	1	0	-0.00946065	0.957343	0.80067	2.12056e-06	0.1325	0.731761	0.0146044	0.948683	non-dropout
GPR176	1	0	0.055068	0.588309	0.283224	9.43055e-05	-0.462544	0.00408339	-0.350475	1.34947e-06	non-dropout
PRRT2	4	0	0.196148	0.365204	-0.592171	0.00724713	0.630621	0.110083	-0.89576	0.00225876	non-dropout
ERI2	15	0	-0.11458	0.313261	-0.254983	0.00348502	0.248283	0.237769	-1.62549	8.15919e-62	non-dropout
DTD2	6	0	-0.248956	0.0825418	-0.667656	2.91648e-06	-0.1908	0.48082	-0.0120932	0.930721	non-dropout
SNX18	1	0	-0.404869	3.20377e-09	-0.183931	0.0305831	-0.353415	0.0456779	0.742133	8.11391e-29	non-dropout
XPOT	1	0	-0.349335	3.05558e-07	-0.340345	1.34964e-05	0.127173	0.51387	-0.619586	1.49042e-23	non-dropout
CMTM7	14	0	0.34665	0.0100789	1.66966	1.54584e-29	0.215278	0.41815	-0.966473	1.2738e-05	non-dropout
PXMP4	13	0	-0.0807852	0.594673	0.372121	0.029915	-0.0983012	0.786841	-0.185234	0.357486	non-dropout
DDX19B	10	0	0.195149	0.0319687	-0.266919	0.00931999	0.0866102	0.714474	-0.388662	3.61364e-05	non-dropout
NRM	2	0	-0.25518	0.00415693	-0.295779	0.0027105	-0.304851	0.157784	-0.351605	2.33397e-06	non-dropout
SYNRG	19	0	0.172725	0.00370447	0.229186	0.000976208	0.164313	0.35903	-0.0625894	0.414179	non-dropout
MGAT4B	13	0	0.1668	0.17593	0.588003	5.8213e-09	-0.249683	0.322955	-0.312797	0.0136263	non-dropout
WDR89	6	0	-0.173102	0.0374568	-0.249747	0.0129485	0.123859	0.546006	-0.484545	2.88028e-09	non-dropout
VPS26B	3	0	0.422684	8.22025e-05	0.895537	1.57544e-20	0.163112	0.552589	-0.197361	0.233739	non-dropout
ADCY7	2	0	0.151253	0.0385376	0.202696	0.0164716	0.820071	2.57153e-08	-1.20298	9.57197e-59	non-dropout
LYST	15	0	0.427858	2.34139e-05	-0.520001	1.1263e-08	1.02881	6.70622e-10	-0.33321	1.65629e-05	non-dropout
PLCD3	1	0	0.0397073	0.807028	-0.75621	2.50201e-05	0.546831	0.0664933	1.74622	1.97838e-55	NA
MTFR2	9	0	-0.154028	0.119443	-0.433134	2.56183e-06	-0.0271598	0.924225	-0.264918	0.00208683	non-dropout
CDCA5	3	0	-0.271308	0.000251919	-0.21097	0.0125075	-0.430255	0.0113671	0.128308	0.0578879	non-dropout
CD300A	10	0	0.568959	7.46251e-08	0.779432	0.000158857	0.417196	0.21987	-2.68268	2.85746e-37	non-dropout
SAAL1	1	0	0.131462	0.103827	-0.288923	0.000956	-0.0145661	0.954781	-0.255008	0.000486961	non-dropout
IZUMO4	2	0	0.095642	0.752351	-0.752532	0.0493024	0.648507	0.13696	0.405771	0.170105	non-dropout
ADAT3	2	0	-0.236772	0.0605915	-0.651071	9.79501e-06	-0.16055	0.591009	0.463874	0.00091198	non-dropout
MGAT4A	5	0	-0.401582	0.00092039	-0.439157	8.89561e-06	0.156369	0.494254	0.0670978	0.655975	non-dropout
TMC6	13	0	-0.135777	0.106514	0.784134	1.41638e-19	-0.192197	0.306444	-0.138966	0.0974751	non-dropout
GLCCI1	11	0	0.358825	0.00803623	1.3163	3.53491e-37	0.791996	0.000595126	0.199105	0.304479	non-dropout
STK38	13	0	0.375194	5.30809e-11	0.650135	3.31741e-15	0.369831	0.0437401	-0.580409	2.06981e-16	non-dropout
EXOC3	2	0	0.403913	3.72302e-08	0.375262	3.37199e-06	0.410334	0.0145834	-0.74272	2.21494e-21	non-dropout
OIP5	9	0	-0.239969	0.0850712	-0.373016	0.0168578	0.344672	0.228704	0.0462492	0.834201	non-leukemia-specific dropout
EXOSC8	6	0	-0.0583897	0.587727	-0.407814	2.04342e-05	0.129985	0.552842	-0.377796	3.10007e-07	non-leukemia-specific dropout
SFT2D1	4	0	-0.00354403	0.976005	0.280007	0.00109023	-0.233027	0.254237	-0.745735	9.49354e-23	non-dropout
TEX261	22	0	0.104588	0.114315	-0.178706	0.0391988	-0.135546	0.500236	0.330724	1.33243e-06	non-dropout
TWF2	11	0	-0.132841	0.155839	-0.448141	1.02642e-05	0.0477424	0.859865	0.27688	0.00168106	non-dropout
AZIN2	4	0	NA	NA	1.03191	0.0206435	NA	NA	2.94685	2.20166e-11	NA
SYNPO	2	0	0.654684	3.33184e-05	-0.647325	0.00618933	1.02763	0.000286629	-0.311593	0.309506	non-dropout
PIK3IP1	2	0	0.120341	0.423452	0.99832	2.86611e-12	0.35264	0.356965	-1.36471	9.60231e-05	non-dropout
CHRNA5	6	0	-0.0904304	0.510397	-0.54397	2.82354e-06	-0.0990666	0.722327	0.259028	0.00377561	non-dropout
HENMT1	3	0	0.00988149	0.931607	-0.302343	0.0004097	-0.0476732	0.840512	-0.528027	1.44863e-10	non-dropout
CHRNA7	1	0	NA	NA	1.70704	1.45832e-05	0.164922	0.804704	0.639109	0.0609325	non-dropout
MCM3AP-AS1	1	0	-0.179384	0.0787409	-0.214244	0.0266244	0.0868391	0.717871	-0.0860393	0.327364	NA
TRIM9	2	0	0.183889	0.123097	-0.45678	0.000348492	0.941615	6.56951e-07	0.876641	1.91735e-12	non-dropout
NLRP3	18	0	-0.272021	0.0014438	-0.222278	0.0139799	-0.210557	0.255025	-0.605804	4.95999e-23	non-dropout
SNORD15B	4	0	-0.166405	0.333833	-0.48393	0.00180121	-0.374259	0.173308	0.399952	0.00965076	NA
TIRAP	1	0	0.319141	0.00651271	0.5088	0.00324338	0.430482	0.112262	-0.82523	6.27407e-07	non-dropout
MIR155HG	13	0	-0.247303	0.0389387	-0.457299	1.15839e-05	-0.0891546	0.717678	0.0831139	0.283413	NA
LRRC37B	1	0	0.155358	0.152318	0.274205	0.0107959	0.255896	0.273486	-0.317147	0.0314144	non-dropout
BTBD9	10	0	0.165011	0.0410272	0.631986	1.50311e-13	-0.117623	0.597855	0.0691955	0.462593	non-dropout
MBD6	17	0	0.21682	0.0194286	0.193092	0.0235964	0.116724	0.591075	-0.421282	1.01415e-06	non-dropout
SLC25A25	6	0	-0.198866	0.0232844	0.285299	0.00398462	-0.456781	0.00703181	1.0442	2.79373e-50	non-dropout
TUBGCP5	2	0	0.229924	0.000660176	-0.399023	1.42032e-07	0.118392	0.540056	0.324816	1.43186e-06	non-dropout
FMNL2	13	0	-1.05366	8.27376e-71	-0.372441	5.42023e-08	-0.524769	0.000490381	0.112484	0.0745209	non-dropout
MYSM1	6	0	0.11597	0.143201	-0.256278	0.00515038	0.302901	0.106927	-0.332773	4.78576e-08	non-dropout
ZBED9	1	0	0.163784	0.152905	0.337865	0.00208564	0.230127	0.344653	0.0967444	0.450592	NA
RHPN1	5	0	0.179184	0.303788	1.05155	7.27778e-11	-0.481086	0.140902	0.0665968	0.801295	non-dropout
PWWP2A	15	0	-0.159406	0.0656386	-0.266644	0.000459172	0.0797288	0.721127	0.507177	1.79956e-14	non-dropout
SMYD4	6	0	-0.0642122	0.551318	-0.322762	0.000486522	-0.0328625	0.897419	-0.301916	0.000696548	non-dropout
OSBPL7	15	0	0.0808575	0.484975	0.589726	4.83637e-07	-0.518389	0.00815326	1.22634	1.14017e-24	non-dropout
OSBPL8	22	0	-0.127557	0.242785	-0.452723	1.31043e-10	0.055772	0.793806	0.135165	0.0306144	non-dropout
OSBPL11	10	0	-0.045647	0.594174	-0.301114	0.000654792	0.480982	0.00405792	0.697444	5.74227e-26	non-dropout
C1QTNF3	3	0	0.429749	0.0351122	0.395526	0.0145466	0.839159	0.00299681	0.37172	0.0487481	non-dropout
VASN	6	0	NA	NA	1.08165	1.58821e-09	0.216937	0.773216	3.28377	1.19762e-63	non-dropout
ADCY9	2	0	-0.0251968	0.805096	0.830137	2.33785e-23	-0.153046	0.467927	0.0537955	0.582544	non-dropout
MB21D1	6	0	-0.747057	1.70915e-27	-0.360702	1.18888e-05	-0.757198	1.54454e-07	-0.23109	0.000288982	non-dropout
SLC26A9	2	0	1.63534	1.7553e-31	-1.0703	1.04008e-08	1.30003	1.26453e-05	-5.05875	6.25638e-21	non-dropout
HAUS1	25	0	-0.0102731	0.951714	-0.526855	6.73114e-06	-0.0571745	0.830744	-0.221183	0.0482178	non-dropout
2003-03-01	13	0	-0.198758	0.262909	1.31149	1.51939e-33	0.836626	0.000342966	0.593854	0.000281302	non-dropout
CKB	9	0	0.381044	0.252158	1.27945	0.00606859	NA	NA	NA	NA	non-dropout
KCTD12	10	0	-0.577747	1.56172e-18	-0.540396	2.8775e-09	-0.09657	0.665859	0.886524	4.71047e-52	non-dropout
GPR146	1	0	NA	NA	2.07849	6.98315e-13	NA	NA	NA	NA	non-dropout
CISH	8	0	-0.161486	0.263148	-0.694906	1.53976e-05	-0.727002	0.000368849	0.63115	2.71031e-12	non-dropout
UHRF2	16	0	0.14132	0.0191762	-0.219115	0.00148369	0.291531	0.0691384	-0.0447652	0.478874	non-dropout
TNFRSF13C	1	0	0.492319	1.71908e-11	0.674756	1.41662e-16	0.14519	0.500917	-0.388673	0.000864897	non-dropout
EVI5L	11	0	-0.0408884	0.767203	0.425734	0.00328723	-0.352144	0.148043	0.555379	0.00379595	non-dropout
ARL11	2	0	-0.0875149	0.444575	0.402608	2.61145e-05	0.181171	0.462115	-0.439304	7.72305e-06	non-dropout
OSR2	17	0	-0.537274	0.164087	1.00987	1.15809e-06	-0.614473	0.318047	2.23546	4.23017e-13	non-dropout
LRRC58	11	0	0.0311241	0.748359	-0.342867	7.03109e-05	0.120321	0.589397	0.0687504	0.233088	non-dropout
FAM122A	12	0	-0.0154385	0.881474	0.251588	0.000540243	-0.189058	0.335742	0.134422	0.0784073	non-dropout
COX20	7	0	-0.10024	0.284577	-0.448119	3.92468e-08	-0.144698	0.505133	-0.296169	1.27464e-05	non-leukemia-specific dropout
CKS1B	9	0	-0.384724	0.000269864	-0.314937	0.00985259	-0.183373	0.419497	0.747271	1.11959e-11	NA
LYPD1	1	0	NA	NA	3.15054	3.11293e-08	NA	NA	NA	NA	non-dropout
TSEN15	2	0	-0.0548182	0.570775	-0.774996	2.9271e-17	0.251043	0.216139	-0.0241539	0.775305	non-dropout
FAM129A	14	0	-1.27184	6.14622e-15	0.46083	0.0254829	2.72981	4.2445e-23	0.315704	0.113841	non-dropout
CNTROB	11	0	0.160646	0.0568307	0.170388	0.0484307	0.124977	0.548482	-0.379085	2.3946e-05	non-dropout
LEAP2	1	0	0.0121826	0.975836	-0.53579	0.0327092	-0.0786893	0.887685	-0.0243225	0.945892	non-dropout
MED12L	1	0	-0.680811	4.91942e-39	-0.349183	2.12406e-08	-1.20343	1.08609e-18	0.201074	0.000481234	non-dropout
WDR17	3	0	-0.078026	0.662556	-0.377461	0.0450416	0.423712	0.0987487	0.354076	0.0116186	non-dropout
ARAP2	16	0	-0.767355	2.03332e-23	-0.188567	0.0106088	-0.0827517	0.705697	-0.339119	4.1412e-08	non-dropout
ARAP1	2	0	0.215082	0.00451737	0.53298	9.9031e-10	0.0672335	0.771789	-0.58478	9.1405e-11	non-dropout
AGAP1	9	0	-0.322905	6.21596e-05	0.396944	3.78699e-05	-0.062131	0.798955	0.368977	5.61059e-05	non-dropout
TADA1	22	0	-0.0261119	0.787846	-0.198183	0.0279524	-0.135391	0.502883	-1.10328	1.39942e-47	non-dropout
CATSPER2	2	0	0.30932	0.0180216	0.47117	0.00130723	0.748609	0.000423367	0.110216	0.45089	non-dropout
SSX2IP	4	0	0.473332	3.58955e-09	0.277137	0.00253768	0.528013	0.00517941	-0.229276	0.0246238	non-dropout
TAGAP	26	0	-0.41484	1.71964e-06	-0.981094	4.4561e-26	0.429096	0.0342242	0.19332	0.0326735	non-dropout
PARD3B	2	0	0.0693024	0.703221	0.326753	0.0164356	0.801213	0.00112727	0.0157476	0.929283	non-dropout
RFFL	3	0	0.102833	0.398569	-0.450691	0.000451878	0.459991	0.052788	-0.871575	3.03343e-10	non-dropout
ZNF354B	1	0	-0.276413	0.00432289	-0.206713	0.0339314	0.0709416	0.769647	0.0701312	0.424224	non-dropout
CLCN4	2	0	-0.418498	8.9995e-06	1.41995	4.84652e-35	1.36871	3.11698e-14	-0.48121	0.00177489	non-dropout
ANTXR2	10	0	-0.215447	0.00684896	-0.315886	0.00521853	0.174993	0.482862	-0.0978478	0.438612	non-dropout
EXOSC6	3	0	-0.120574	0.0969422	-0.221316	0.0143491	-0.517587	0.00151658	0.142578	0.0515994	non-dropout
C10orf71	2	0	1.05648	5.6509e-14	1.10287	2.32854e-20	1.36141	8.46292e-08	-2.60546	2.29564e-15	non-dropout
CFAP70	4	0	1.26081	1.21725e-15	0.893306	1.27696e-07	0.618667	0.0389514	0.536386	0.0203089	NA
CLCN6	14	0	0.211201	0.00223239	0.18885	0.0122497	0.205753	0.265236	0.0376299	0.637383	non-dropout
CLCN7	11	0	0.482229	3.33571e-07	0.469427	5.79736e-07	-0.00537523	0.986291	0.0861834	0.485804	non-dropout
ADD2	7	0	0.338141	4.87561e-08	0.355949	2.45783e-06	0.133823	0.472979	-0.37483	3.71507e-08	non-dropout
ANAPC16	6	0	-0.135906	0.159584	-0.196927	0.0490401	0.459121	0.0475333	-0.0587827	0.510323	non-dropout
ADD3	8	0	0.29976	1.38316e-05	0.242928	0.00341433	0.280523	0.185145	0.512507	1.32026e-10	non-dropout
TPP1	15	0	0.208456	0.037654	0.232009	0.0129649	0.180076	0.415786	-0.315957	0.00236203	non-dropout
SLC36A4	1	0	0.207651	0.0424212	-0.440884	4.16873e-07	0.324518	0.143988	-0.739062	1.34472e-23	non-dropout
CYP2R1	2	0	-0.410896	1.3537e-07	-0.900558	4.55898e-15	0.630005	0.002232	-0.121051	0.233072	non-dropout
DNAJC24	2	0	0.0876231	0.547675	-0.280146	0.0280655	0.362257	0.104669	0.358343	0.00093139	non-dropout
CLNS1A	6	0	0.0388435	0.71922	-0.388578	2.02553e-07	0.115753	0.56612	0.211006	0.00177385	non-dropout
LRIG3	2	0	-0.450609	0.000201804	-0.359847	0.000291974	-0.262624	0.204931	-0.0682998	0.541978	non-dropout
SLC15A4	1	0	-0.135836	0.054129	-0.322567	8.0164e-06	-0.0878073	0.669033	-0.141633	0.0720786	non-dropout
RHEBL1	2	0	0.186608	0.165894	-0.955801	2.39605e-14	-0.377145	0.160439	0.549116	0.00159326	non-dropout
TPH2	1	0	-2.68169	3.94353e-35	0.258255	0.0217306	-1.95594	2.43816e-08	-1.82614	1.69542e-37	non-dropout
CLTC	23	0	0.225849	2.98255e-05	0.653479	1.17846e-33	0.0749425	0.69567	-0.223556	0.000147934	non-leukemia-specific dropout
SP7	1	0	-0.139	0.414448	-3.76749	8.55676e-18	0.862181	0.0833942	-2.62018	3.40997e-25	non-dropout
NEDD1	4	0	-0.132923	0.161165	-0.421453	6.1276e-06	0.202454	0.338487	0.336568	3.07489e-07	non-leukemia-specific dropout
ERP27	2	0	0.0897722	0.579369	0.480201	0.000682514	0.381537	0.143751	0.0292173	0.798006	non-dropout
FGD4	1	0	0.965931	2.40123e-10	0.776006	2.88866e-05	2.12386	8.63745e-16	-0.0580634	0.833325	non-dropout
AEBP2	7	0	0.0125025	0.895194	-0.221263	0.00482187	0.181779	0.344494	-0.429657	3.99805e-10	non-dropout
BTBD11	1	0	0.874453	1.07495e-27	0.376287	0.000104781	0.694154	0.00046607	0.353123	0.00743427	non-dropout
SLAIN1	19	0	-0.826678	8.15939e-23	0.487163	2.53622e-09	-1.03977	6.14279e-12	0.0983773	0.30544	non-dropout
LRR1	2	0	-0.381244	3.33538e-07	-0.276748	0.000260782	-0.194512	0.325441	0.192857	0.00276351	non-leukemia-specific dropout
JDP2	1	0	-0.813744	2.39158e-25	-1.04276	5.00421e-09	1.12958	2.50979e-07	0.320621	0.0671256	non-dropout
PLIN2	5	0	0.266449	0.00145843	-0.258044	0.00227308	-0.615363	0.000117605	0.223965	0.000370479	non-dropout
CCR1	13	0	-0.467607	0.000130901	-2.67	2.80848e-36	-0.36491	0.189031	-3.75225	3.03725e-143	non-dropout
TARSL2	1	0	0.514783	1.80611e-14	0.571503	6.55321e-12	0.171762	0.418539	1.21611	2.36136e-61	non-dropout
CCR7	1	0	0.776445	2.42703e-09	-0.82995	0.00735387	0.913659	0.00151308	-1.24059	2.3148e-15	non-dropout
FSD2	1	0	0.642132	1.5271e-07	1.76339	2.82646e-10	0.68185	0.0505088	-1.37466	1.59293e-08	non-dropout
ACKR2	12	0	0.239615	0.143988	-0.294613	0.032319	0.453481	0.0638326	-1.79572	4.81362e-42	non-dropout
NTAN1	1	0	0.031934	0.839232	-0.240955	0.0493024	0.0831345	0.794299	-0.266484	0.0452075	non-dropout
DCUN1D3	4	0	-0.0866461	0.47611	-0.341933	0.00384273	-0.234471	0.295366	0.326245	0.000485094	non-dropout
CMTM3	3	0	-0.128012	0.185686	-0.469051	4.74519e-05	0.196407	0.310211	-1.08775	3.47733e-48	non-dropout
CDYL2	2	0	-0.207667	0.0736144	0.770954	3.4626e-13	-0.13017	0.644884	0.0929853	0.561187	non-dropout
ABCC2	1	0	0.339406	0.0820541	0.342398	0.0168687	0.05538	0.868855	0.452882	0.0266411	non-dropout
SNX20	7	0	-0.00577689	0.975062	0.760695	7.05577e-12	0.36557	0.211094	-1.8346	8.03184e-17	non-dropout
MSI2	7	0	0.413434	1.54123e-10	0.416643	5.07144e-07	0.390306	0.028753	0.0806459	0.306781	non-dropout
CYB5D1	3	0	0.0515093	0.666967	-0.436538	5.65636e-05	-0.555611	0.00508578	-0.712065	8.44003e-12	non-dropout
USP43	1	0	-0.204453	0.0365461	0.284256	0.00228975	-0.232791	0.248413	-1.15814	2.26098e-21	non-dropout
KRBA2	1	0	-0.0737227	0.665001	0.298836	0.0257205	-0.244154	0.325703	0.853397	9.86082e-10	non-dropout
SLC43A2	12	0	0.649981	2.15649e-14	0.38394	6.47039e-07	0.793885	5.89941e-08	-1.64871	1.59744e-85	non-dropout
ZFP3	15	0	-0.0659563	0.363316	0.152467	0.0358352	0.037532	0.864055	0.415457	5.35985e-11	non-dropout
EFCAB13	1	0	0.51197	0.0204239	0.542641	0.0193856	0.614487	0.14363	-0.141025	0.64772	non-dropout
TBC1D16	3	0	-0.122335	0.121317	-0.37762	0.00575981	-0.149644	0.497024	0.0673013	0.546265	non-dropout
MIEF2	1	0	0.292147	0.0155849	0.829956	1.0615e-06	-0.147528	0.630486	1.70506	3.92412e-18	non-dropout
FAM210A	15	0	0.0152588	0.896741	-0.264744	0.00193801	-0.227065	0.266932	-0.241444	0.000392728	AF9 specific
INO80C	2	0	-0.266766	0.00477029	-0.592382	8.72782e-09	-0.132722	0.573802	-0.260352	0.015126	non-dropout
TTC39C	11	0	0.170163	0.00937589	-0.219521	0.0312878	0.484337	0.00256195	-0.604401	1.10676e-22	non-dropout
ZNF543	6	0	-0.213652	0.00912747	0.346475	0.00015529	0.185432	0.385508	0.0240612	0.823406	non-dropout
OSCAR	1	0	-0.12003	0.75374	-1.4202	0.00490459	NA	NA	NA	NA	non-dropout
IRGQ	12	0	0.259972	0.00860996	-0.229751	0.0164542	-0.407683	0.00792641	-0.5945	8.39019e-26	non-dropout
MOB3A	8	0	-0.265741	0.00171565	-0.364622	8.58632e-05	0.113067	0.550011	-2.34305	0	non-dropout
MFSD12	5	0	0.0628711	0.563004	-0.323921	0.00326657	-0.273403	0.199737	1.31219	3.54861e-70	non-dropout
ZNF792	1	0	-0.486513	1.02254e-11	0.854098	3.31348e-28	-0.403298	0.032949	-0.975517	5.19747e-25	non-dropout
NR2C2AP	3	0	-0.218175	0.0320702	-0.345305	0.00181338	-0.651606	0.00178458	-0.119434	0.316433	non-dropout
CCSAP	6	0	0.0130976	0.901252	-0.198491	0.0270452	-0.00521005	0.985763	1.14996	1.04395e-39	non-dropout
IFFO2	2	0	0.190265	0.113878	0.387315	2.59826e-05	-0.111588	0.619734	0.595264	4.47269e-15	non-dropout
TYW3	2	0	0.119358	0.114844	-0.220864	0.00799502	0.0758339	0.727847	-0.634291	2.21587e-22	non-dropout
TPRG1L	8	0	0.0676896	0.480894	0.447812	3.19675e-05	-0.314039	0.146599	0.25739	0.0325334	non-dropout
ZNF684	12	0	-0.36066	0.00328907	-0.615248	9.78337e-06	0.175531	0.545383	0.737748	2.5589e-17	non-dropout
COL1A1	1	0	0.736905	0.00132515	-1.33717	0.00115653	1.19386	0.0201188	NA	NA	non-dropout
UHMK1	11	0	-0.0194335	0.834261	-0.222958	0.00136294	0.123468	0.516841	0.0173315	0.794143	non-dropout
FCRLB	7	0	1.82385	2.83651e-24	0.784409	0.000456011	1.28729	0.000141583	-1.46882	4.60775e-05	non-dropout
IQGAP3	9	0	-0.287166	0.000512341	-0.607894	1.97889e-18	0.225378	0.244207	-0.804403	6.69882e-26	non-dropout
TATDN3	2	0	0.081984	0.501466	-0.433648	0.000152734	0.47355	0.0287727	-0.260288	0.0142271	non-dropout
TANGO2	4	0	0.188211	0.0269964	0.206406	0.0453238	-0.213313	0.279299	-0.235547	0.00725609	non-dropout
TMEM150A	1	0	0.307353	0.151047	1.23885	0.000310277	-0.524404	0.324662	2.0132	4.21425e-15	non-dropout
COL7A1	1	0	0.126764	0.386138	-0.375337	0.0212457	-0.468556	0.14161	-1.06404	1.52113e-08	non-dropout
NUP35	7	0	-0.247348	0.00202844	-0.430446	2.92559e-06	-0.14009	0.495697	-0.446154	2.14009e-09	non-dropout
DIS3L2	3	0	-0.0226556	0.793886	0.22122	0.00179221	-0.0095402	0.968756	0.175583	0.0192127	non-dropout
CMPK2	2	0	-0.540752	7.95104e-07	0.671624	2.9954e-11	0.119511	0.646342	-1.15277	3.24184e-19	non-dropout
MBOAT2	19	0	-0.106784	0.375247	-0.42326	0.000776444	0.287861	0.180696	-0.152884	0.128906	non-dropout
COL9A2	6	0	-0.0165505	0.909265	-0.930888	1.23045e-08	0.974666	7.11151e-06	-2.32431	2.61479e-78	non-dropout
RBM45	1	0	-0.175399	0.123371	-0.327757	0.00510504	-0.00438035	0.989655	0.972806	1.80802e-17	non-dropout
ICA1L	6	0	-0.110885	0.715188	0.403552	0.0396557	0.8763	0.00257279	-0.730207	0.000817204	non-dropout
ACVR1C	2	0	-0.195106	0.605847	0.838966	0.0156526	1.33066	0.00860804	NA	NA	non-dropout
ZNF513	21	0	-0.184507	0.119926	0.301919	0.0368661	-0.547052	0.0265237	-0.064011	0.647047	non-dropout
AHSA2	27	0	-0.0855427	0.294149	-0.173004	0.0472541	0.0387587	0.865015	-0.719093	1.59849e-19	non-dropout
MTERF4	2	0	0.00684919	0.941344	0.246961	0.000552624	-0.140136	0.471081	-0.0802585	0.250982	NA
COL19A1	2	0	NA	NA	3.72189	4.42438e-07	NA	NA	NA	NA	non-dropout
DNAJC19	2	0	-0.260777	0.0276058	-0.322873	0.0074283	0.0525379	0.856633	0.446464	0.000599788	non-dropout
LRRC15	1	0	-1.14151	0.000145591	1.90401	6.44706e-34	-0.550484	0.165184	-3.61327	4.21055e-25	non-dropout
KLF6	32	0	-0.366294	5.61148e-08	-0.239187	0.0314861	-0.225382	0.262226	0.24928	0.00531761	non-dropout
SLC31A1	7	0	0.00593893	0.96426	-0.399743	0.00131704	-0.0889373	0.747258	0.305658	4.22858e-05	non-dropout
NUDT16	4	0	0.307568	0.000100819	0.3108	0.000726942	0.275089	0.16386	-0.0372724	0.735242	non-dropout
ADK	16	0	0.0755153	0.384722	0.210485	0.021704	-0.246859	0.183058	0.332107	2.31986e-06	non-dropout
GLYCTK	4	0	0.176545	0.0760245	0.265169	0.00254408	-0.223597	0.254237	-0.0791771	0.450592	non-dropout
PABPC4L	1	0	-0.464662	0.00302846	-0.578023	2.4806e-06	0.258047	0.301479	-0.730718	5.01837e-11	NA
LIN54	4	0	-0.139111	0.0831167	-0.290425	0.000102675	0.0132657	0.959414	0.524382	1.43007e-14	non-dropout
PACRGL	2	0	0.00527295	0.969528	-0.291883	0.0105805	0.211931	0.361562	0.803366	3.44022e-17	non-dropout
SLC9B2	2	0	-0.151087	0.0649158	0.170402	0.0451457	0.173306	0.42636	-0.283328	0.000167512	non-dropout
EMB	3	0	-0.243284	0.0105999	-0.328793	0.00129393	0.31976	0.113338	-1.08854	2.39534e-53	non-dropout
PPARGC1B	12	0	0.0374259	0.63889	0.19893	0.0176481	-0.241497	0.170499	-0.562082	3.39741e-19	non-dropout
DNAJC21	3	0	-0.0852923	0.275332	-0.206958	0.0195415	0.136807	0.509601	0.428802	7.06137e-12	non-dropout
GRPEL2	5	0	-0.444471	3.81065e-14	-0.437802	9.02358e-10	-0.236618	0.171818	-0.715774	3.03357e-39	non-dropout
STARD4	4	0	-0.0927806	0.295446	-0.817524	2.21684e-30	0.23627	0.23959	0.590458	1.03526e-27	non-dropout
WDR36	6	0	0.121248	0.192203	-0.192551	0.0108971	0.154015	0.399696	-0.184988	0.001405	non-dropout
NUDCD2	17	0	-0.45066	0.00403439	-0.390727	0.000701884	-0.237028	0.335748	-0.276664	0.0333689	non-dropout
SHROOM1	1	0	1.02027	8.75119e-13	0.49458	0.031432	1.08169	0.000271867	-0.906956	0.0003431	non-dropout
STXBP5	6	0	-0.451769	1.03221e-07	0.218578	0.0273072	0.30277	0.125261	0.240022	0.00645743	non-dropout
ADORA2A	2	0	0.26817	0.349287	1.01071	0.000652508	0.154179	0.791247	-1.91218	0.000128935	non-dropout
NCOA7	21	0	-0.248973	0.000154779	-0.262465	0.00388766	0.233269	0.199938	-0.650262	3.02714e-26	non-dropout
CD109	13	0	-0.260102	0.000808668	1.22253	1.05752e-69	-0.756839	4.00339e-06	-0.529393	8.91783e-13	non-dropout
PM20D2	8	0	-0.396943	1.11626e-07	-0.390083	5.63126e-08	0.0211902	0.936078	-0.298075	1.60073e-05	non-dropout
COX11	3	0	-0.124883	0.230612	-0.377741	7.69864e-05	-0.0247867	0.925813	0.630727	6.33693e-16	non-leukemia-specific dropout
ADORA2B	3	0	-0.0210909	0.923914	-0.33411	0.0443986	0.195342	0.54851	-1.30179	1.13103e-11	non-dropout
LRGUK	3	0	1.07157	3.04695e-05	0.859925	0.000261039	0.518615	0.224738	0.681905	0.0139762	non-dropout
CPOX	2	0	-0.137931	0.236383	-0.294161	0.013922	0.0859055	0.745971	1.43423	4.63547e-50	non-dropout
CPS1	2	0	0.180689	0.525703	-0.711385	0.00670629	0.110492	0.850793	0.0841784	0.756396	non-dropout
CPT1A	10	0	0.760532	4.21461e-08	1.79499	5.79948e-38	0.808372	0.0116582	-0.217209	0.415237	non-dropout
NDUFAF6	6	0	0.133305	0.202169	-0.286628	0.0091174	0.172439	0.469073	-0.131735	0.133618	non-dropout
TMEM68	3	0	-0.275805	0.00184351	-0.474074	1.06128e-05	0.146737	0.527063	0.108055	0.223412	non-dropout
PXDNL	1	0	0.96428	0.00420699	1.03492	0.0354173	0.332628	0.624332	NA	NA	non-dropout
LETM2	7	0	-0.088163	0.592468	-0.497562	1.54675e-05	0.01521	0.966458	-0.672703	2.35912e-08	non-dropout
HGSNAT	9	0	0.422346	6.7291e-07	0.532332	1.78668e-05	0.854864	1.02469e-05	0.0651637	0.614563	non-dropout
NACC2	3	0	0.0208011	0.929409	0.605123	0.0294745	1.18569	0.00477204	-3.17238	5.56972e-32	non-dropout
LCN8	1	0	0.766264	4.61953e-05	0.994962	2.97053e-13	0.833249	0.00132459	-3.13512	3.71227e-11	non-dropout
FAM69B	1	0	-0.733255	5.18337e-08	0.671772	5.29843e-11	-0.376124	0.224373	-1.48324	8.77214e-15	non-dropout
PTRH1	9	0	0.0365639	0.913195	0.578581	0.0407441	-0.527394	0.194515	0.180362	0.631073	non-dropout
PTPDC1	12	0	-0.121907	0.305662	-0.273486	0.0269348	0.0206601	0.948392	-0.468385	0.000116567	non-dropout
CREBBP	35	0	0.0770873	0.220488	0.31989	9.86331e-07	-0.146416	0.427196	-0.49921	6.32521e-16	non-dropout
SLITRK4	3	0	-0.602423	3.82016e-15	0.267173	0.0013832	0.533071	0.00456377	-1.90883	3.16583e-75	non-dropout
APOOL	4	0	0.240853	0.00271195	-0.261143	0.0288593	0.361784	0.11006	-0.372117	2.98132e-06	non-dropout
CRIP1	4	0	0.299834	0.020893	0.515753	0.00386674	0.566906	0.0741361	0.948995	2.03119e-06	non-dropout
GAB3	5	0	-0.0210134	0.841721	0.443039	8.9174e-07	0.494082	0.0100547	-0.299463	0.00496602	non-dropout
CRK	8	0	-0.152671	0.0212551	-0.172791	0.0296057	0.0848324	0.694222	0.61842	1.04605e-15	non-dropout
DOCK11	6	0	-0.25372	4.80643e-05	0.631671	2.26047e-17	-0.0513839	0.805724	0.0472307	0.475141	non-dropout
CRMP1	2	0	-0.373087	1.11984e-08	1.21043	3.04585e-47	0.327172	0.0889825	-1.79592	9.54025e-64	non-dropout
APOBEC3D	1	0	-0.246156	0.0188829	0.687543	3.74912e-11	-0.599239	0.00652608	-0.836554	3.79275e-08	non-dropout
NEK7	15	0	-0.0939408	0.29823	-0.611418	2.76505e-11	-0.0327139	0.90608	0.157524	0.0436593	non-dropout
ZBTB46	4	0	0.113654	0.62547	2.35428	4.14378e-36	0.644856	0.160151	-0.601532	0.0522716	non-dropout
NOL4L	1	0	0.368087	2.85216e-10	0.814441	2.10637e-29	0.378346	0.0231471	-0.840972	5.95232e-38	NA
CCM2L	2	0	NA	NA	1.64378	2.29426e-05	-0.899171	0.170664	NA	NA	non-dropout
SOGA1	2	0	-0.23719	0.000287118	0.333362	1.65538e-05	-0.146818	0.437285	-0.10084	0.259719	non-dropout
TLDC2	1	0	NA	NA	3.06945	3.35789e-27	NA	NA	NA	NA	non-dropout
UBE2F	17	0	0.393034	5.4604e-06	0.303265	0.0286033	0.324038	0.174304	-0.0272132	0.8583	non-dropout
CRY2	6	0	-0.0104389	0.922765	0.212331	0.0283803	-0.172151	0.387144	1.17084	1.98983e-66	non-dropout
NANP	14	0	-0.383398	2.24708e-07	-0.756621	1.69785e-21	-0.241981	0.205358	0.135914	0.0469455	non-dropout
ZNF280B	2	0	-0.283614	0.0166755	-0.309592	0.0245471	0.281574	0.227627	0.9398	7.69923e-20	non-dropout
SIRPA	11	0	-0.448636	4.69989e-09	-1.17084	1.65307e-16	0.468234	0.047023	-1.68093	4.3524e-38	non-dropout
SREK1	13	0	0.0321351	0.748359	-0.195048	0.0167803	0.199187	0.334708	-0.0505701	0.420178	non-dropout
ADPRH	3	0	0.0056608	0.981661	0.717653	0.01046	1.3239	7.61332e-05	-2.03026	7.69998e-08	non-dropout
MAPK14	11	0	-0.365481	4.71218e-09	0.143984	0.0419965	0.0118899	0.960741	0.46745	6.97679e-13	non-dropout
CSE1L	8	0	-0.0700754	0.297986	-0.282679	2.68685e-05	-0.00967886	0.967235	-0.116124	0.0416573	non-leukemia-specific dropout
CSF1	31	0	-0.98496	7.58658e-10	-0.828247	0.0010882	-0.0573175	0.901955	-3.89021	4.77616e-26	non-dropout
CSF1R	22	0	-0.29734	0.000111637	-0.91921	1.24925e-16	0.181811	0.42889	-3.56725	9.35975e-164	non-dropout
FAM76B	13	0	-0.0828827	0.361793	-0.298927	0.000684601	0.218059	0.307012	-0.18536	0.00254931	non-dropout
SESN3	10	0	0.666654	9.49176e-22	1.15422	1.48068e-34	1.12925	4.58542e-09	2.60466	1.96575e-110	non-dropout
PIWIL4	3	0	-0.130013	0.363801	0.497334	0.000310277	0.641327	0.0217677	0.515554	9.11849e-05	non-dropout
KDELC2	1	0	-0.106257	0.399213	-0.455379	5.73348e-09	0.445215	0.0297214	-0.818265	3.08575e-19	non-dropout
C11orf84	14	0	-0.13347	0.0705793	-0.28068	0.0163735	-0.462721	0.013661	1.1001	5.05643e-42	non-dropout
PLEKHA7	2	0	0.254476	0.547675	1.24949	0.00123522	1.23671	0.0360266	NA	NA	non-dropout
DNHD1	1	0	0.1197	0.141222	0.218737	0.0166156	0.322736	0.0802949	0.330235	0.00242616	non-dropout
PRICKLE1	18	0	0.617162	3.82164e-12	1.13599	1.35572e-34	0.797666	1.50846e-05	-1.48063	5.57837e-27	non-dropout
SLC2A14	1	0	-1.29882	4.41572e-15	-1.2625	0.000280174	-0.0236035	0.976855	0.412384	0.234667	non-dropout
BCDIN3D	2	0	0.00184697	0.988186	0.289434	0.00171766	0.216878	0.302593	-0.1249	0.357084	non-dropout
ALG10B	2	0	0.0752337	0.558562	-0.313106	0.00065116	0.349224	0.0775657	-0.628644	4.0369e-15	non-dropout
ZNF664	10	0	-0.112883	0.137152	-0.322246	1.24134e-05	-0.178201	0.329718	-0.374871	2.08259e-06	non-dropout
CPNE8	6	0	-0.565198	2.05718e-12	-0.454353	1.62509e-07	-0.425745	0.0137424	-0.00814513	0.925225	non-dropout
TMEM120B	6	0	0.0173214	0.864908	0.201869	0.0323402	-0.407789	0.0337451	0.0142885	0.89251	non-dropout
WDR66	3	0	0.287311	0.0233096	-0.395963	0.0206031	0.465689	0.140745	0.263374	0.205415	non-dropout
BEST3	1	0	NA	NA	6.59413	8.18242e-36	NA	NA	NA	NA	non-dropout
C12orf66	2	0	-0.0494178	0.696461	-0.257452	0.0108622	0.103034	0.664382	-0.301775	0.0169917	non-dropout
FBXL14	1	0	-0.140117	0.078727	0.292433	0.0159731	-0.471947	0.0190917	0.464185	3.14481e-08	non-dropout
RAD9B	2	0	-0.0777426	0.688727	-0.381791	0.0274855	0.882736	0.0015885	-0.449209	0.0122109	non-dropout
PTGR2	2	0	0.00142616	0.993736	-0.55085	0.000206338	0.250855	0.374429	-0.400037	0.00143076	non-dropout
CEP128	3	0	0.039118	0.672152	-0.419164	1.48363e-05	0.125151	0.605775	0.236123	0.00200053	non-dropout
TTC7B	3	0	-0.182642	0.563188	0.820946	0.00160271	1.43889	0.000947049	NA	NA	non-dropout
FAM81A	2	0	-0.547445	0.00116104	-0.454801	0.00975775	0.0386217	0.908	0.495696	0.00324001	non-dropout
TTBK2	31	0	-0.00606388	0.94488	-0.425015	9.11687e-10	-0.261211	0.128789	0.170732	0.0103931	non-dropout
VCAN	7	0	-0.945785	7.72308e-33	-1.88329	1.74757e-83	1.23308	2.34182e-13	-0.69348	7.94677e-20	non-dropout
CMTM4	6	0	-0.109551	0.328101	0.231711	0.0114127	0.879679	1.41343e-06	-0.279301	0.00463059	non-dropout
CSPG4	3	0	-0.730772	2.09844e-44	-0.619354	4.98227e-13	-0.785672	2.65407e-06	-2.14584	5.11094e-270	non-dropout
TMED6	1	0	-0.140769	0.628885	0.626395	0.00994416	0.00465298	0.993854	1.26922	1.40348e-05	non-dropout
CSRP1	23	0	-0.169969	0.209347	-0.322726	0.010189	-0.298346	0.25287	0.744179	4.73289e-15	non-dropout
ZNF785	5	0	-0.31673	5.98562e-06	-0.200494	0.032493	-0.131488	0.529766	-0.899452	3.91625e-18	non-dropout
CSRP2	2	0	0.162741	0.42094	-0.822603	7.28495e-05	0.816179	0.0113997	2.4103	3.62861e-78	non-dropout
MGAT5B	1	0	-0.0897069	0.358568	0.358754	0.0013951	0.771412	2.1369e-06	-0.807411	9.78937e-16	non-dropout
TOM1L2	2	0	0.104248	0.25883	0.537902	4.69858e-08	-0.075459	0.757462	0.623651	5.80061e-06	non-dropout
CD300LF	2	0	-0.571175	0.00151292	-0.964633	0.0293248	0.373974	0.391877	-2.10116	1.8646e-11	non-dropout
RTN4RL1	1	0	0.448639	0.0871547	2.26508	2.60177e-75	0.022341	0.968818	NA	NA	non-dropout
KIF18B	19	0	-0.383587	1.49344e-10	-0.259621	0.00361878	-0.0319861	0.893139	-0.249064	0.000184078	non-dropout
EME1	16	0	-0.135174	0.141203	-0.448914	2.49016e-07	-0.127978	0.587564	-0.282914	0.0048431	non-dropout
PROCA1	2	0	-0.223619	0.0537417	-0.30494	0.00423263	-0.0920408	0.744929	-0.473311	0.000193824	non-dropout
DHRS13	1	0	-0.0518395	0.741686	-0.371548	0.00607265	-0.225549	0.425491	-0.145396	0.423603	non-dropout
TMC8	8	0	-0.230532	0.00451147	0.425063	1.17178e-06	-0.621599	0.000140828	-1.46809	1.20323e-65	non-dropout
CSTB	3	0	0.206096	0.207175	0.723512	1.03573e-06	0.0877764	0.809433	1.01278	1.16068e-16	non-dropout
CSTF3	21	0	-0.0674657	0.488204	-0.177345	0.0391462	0.128301	0.522081	0.249172	0.000410083	non-leukemia-specific dropout
DACT3	2	0	0.614426	0.0167849	0.820791	0.00119858	-0.0155276	0.984998	1.45682	2.4119e-10	non-dropout
ZNF420	4	0	-0.1977	0.06283	-0.368779	2.98566e-05	-0.0901308	0.699427	-0.440271	1.40471e-07	non-dropout
FAM98C	3	0	0.16522	0.333571	0.64064	0.00126435	0.0648055	0.892798	-0.305467	0.28466	non-dropout
CAPN12	1	0	0.359696	0.271063	2.70803	2.31317e-10	NA	NA	NA	NA	non-dropout
TICAM1	3	0	0.317351	0.00401309	0.333282	0.0288628	-0.726364	0.00105949	-0.423868	0.0133168	non-dropout
ZNF714	1	0	0.0187596	0.854986	-0.476731	2.17884e-07	0.328071	0.138719	0.563299	1.58631e-23	non-dropout
ZNF681	1	0	-0.16994	0.162953	-0.402096	0.000113836	0.216506	0.411271	0.157684	0.170666	non-dropout
ATP8B3	6	0	0.179276	0.296106	0.492637	0.00797008	0.204335	0.494254	-0.201746	0.193331	non-dropout
SAMD11	4	0	-0.244049	0.00836283	0.72085	0.000655424	0.35141	0.267284	-1.4728	1.98226e-21	non-dropout
B3GALNT2	6	0	0.186078	0.00522094	-0.360014	1.15809e-06	0.327031	0.090117	0.324887	1.74115e-07	non-dropout
SLC30A7	6	0	-0.0192627	0.85682	-0.231001	0.00569239	0.0873081	0.685848	-0.111095	0.11038	non-dropout
CTGF	4	0	-0.47931	2.30777e-05	1.14792	3.62101e-20	0.240744	0.301549	-0.222469	0.0847406	non-dropout
ZNF362	13	0	0.149521	0.0769213	0.284629	0.00127316	-0.0248848	0.924835	-0.170714	0.137846	non-dropout
LINC01225	1	0	0.989789	1.23381e-15	0.738181	8.77964e-14	0.954068	1.36819e-07	-4.03374	2.04126e-84	NA
CTH	2	0	-0.402012	0.00241962	-0.815803	1.59409e-08	0.325731	0.225844	1.2551	6.10478e-23	non-dropout
LSM14B	13	0	0.00843629	0.930556	0.608828	5.72519e-22	-0.516841	0.00136707	0.184723	0.00542761	non-dropout
LINC00896	1	0	-0.0133608	0.952232	0.404429	0.038974	-0.183596	0.673227	-0.810397	0.00211088	NA
DUSP18	1	0	0.0571518	0.721355	0.38692	0.0490826	-0.13936	0.704511	0.433309	0.0164659	non-dropout
CTPS1	9	0	-0.0701798	0.301536	0.147812	0.0255095	-0.148121	0.408704	0.0109132	0.861698	non-leukemia-specific dropout
MEI1	1	0	0.298995	0.203163	0.915538	3.77667e-06	0.372493	0.366067	-1.43181	1.01991e-05	non-dropout
FAM109B	1	0	-0.178649	0.0947516	-0.688002	1.17506e-07	-0.548452	0.00984728	-1.55618	7.92235e-20	non-dropout
NFAM1	2	0	NA	NA	1.24318	0.00435102	NA	NA	NA	NA	non-dropout
CBWD2	1	0	-0.144928	0.176343	0.259152	0.0205556	0.0959811	0.675498	-0.277473	0.00233354	non-dropout
ITPRIPL1	3	0	-0.589621	7.68066e-20	-0.482358	7.57755e-06	-0.804303	4.39378e-07	-0.843174	2.05458e-25	non-dropout
CTSD	14	0	0.715044	2.24257e-19	0.320135	0.0128294	-0.312971	0.175063	-0.662058	1.6167e-06	non-dropout
ARL6IP6	5	0	-0.211759	0.0431541	-0.32902	0.00036047	0.189189	0.407861	0.861122	1.17491e-28	non-dropout
METTL21A	7	0	0.09352	0.448251	-0.277305	0.00933716	0.077423	0.776692	-0.313284	0.00200991	non-dropout
RMDN2	2	0	0.397207	0.0458163	0.547976	0.00853087	0.557067	0.0763837	-0.752408	0.000525903	non-dropout
CPNE9	1	0	-0.330444	0.321845	0.960878	0.0158386	NA	NA	NA	NA	non-dropout
MB21D2	1	0	0.16429	0.349936	-0.460107	0.00892722	0.419238	0.143751	-0.40265	0.0234762	non-dropout
PPP4R2	11	0	-0.035078	0.71293	-0.224291	0.00363086	-0.0363652	0.872896	-0.551529	4.86387e-12	non-dropout
CTSS	5	0	0.209513	0.0684862	-0.224157	0.0286355	0.311582	0.140967	-0.78252	6.97975e-13	non-dropout
GLIPR2	17	0	0.359723	0.06791	-0.81289	0.024712	2.26658	5.45994e-09	0.0519678	0.808632	non-dropout
CMC1	8	0	-0.0999553	0.579109	-0.405215	0.00853077	0.00881573	0.980809	0.0511624	0.786668	non-dropout
NEK10	1	0	0.354494	0.117841	0.410532	0.0142592	0.218317	0.510005	0.641183	0.000655352	non-dropout
CMTM8	4	0	0.343754	0.360203	1.76204	7.42921e-16	0.293583	0.572606	NA	NA	non-dropout
IGSF11	1	0	NA	NA	2.9322	2.08234e-12	NA	NA	NA	NA	non-dropout
ZNF827	2	0	0.611716	4.72656e-11	0.419713	0.00843811	1.2755	3.03779e-11	0.0189406	0.84608	non-dropout
SCFD2	23	0	0.070649	0.468729	0.192753	0.026321	-0.0792981	0.736848	-0.158318	0.0775545	non-dropout
FAM53A	1	0	-0.0806601	0.710951	0.42973	0.0242377	0.0113521	0.979816	0.321655	0.214149	non-dropout
PPM1K	1	0	-0.122127	0.193158	-0.411615	9.2745e-09	-0.185362	0.346889	0.437857	4.04893e-10	non-dropout
DAB2IP	1	0	-0.291651	0.00022033	0.554201	3.67936e-14	-0.306384	0.0817221	-1.74701	3.62861e-78	non-dropout
CREBRF	28	0	0.289631	0.00192617	0.265709	0.000971228	0.61289	0.000983402	-0.513513	1.13591e-08	non-dropout
CEP120	17	0	-0.202604	0.00750559	-0.487721	3.4353e-10	0.136866	0.493921	-0.513865	7.95359e-12	non-dropout
TMEM167A	14	0	-0.0809118	0.318296	-0.185155	0.0233461	0.15743	0.402968	-0.0536617	0.396489	non-dropout
SRFBP1	16	0	0.122972	0.131859	-0.187399	0.0334903	0.183281	0.364688	0.0570404	0.419322	non-leukemia-specific dropout
BTNL9	1	0	0.527332	2.44073e-08	0.505356	3.75547e-08	0.405269	0.0385088	-1.22027	3.40679e-38	non-dropout
CCDC112	1	0	0.144721	0.224062	0.345501	0.0024024	0.25883	0.272442	0.45583	1.6132e-06	non-dropout
PRELID2	10	0	-0.0307063	0.799287	-0.245393	0.0330946	0.227421	0.321625	-0.481484	2.53692e-08	non-dropout
RNF145	2	0	-0.127995	0.0597161	-0.219907	0.00146624	-0.258171	0.149446	-0.800778	1.57328e-27	non-dropout
ADRB2	3	0	-0.30548	0.00371471	-0.579341	0.000101197	1.36718	4.82878e-09	2.01192	7.16738e-48	non-dropout
CYLD	16	0	0.306475	5.75014e-06	0.165364	0.0491776	0.321461	0.0817221	-0.69663	1.82297e-19	non-dropout
SNRNP48	4	0	-0.0543297	0.594174	-0.398386	3.32593e-06	0.159672	0.470177	0.558503	4.14053e-18	non-dropout
CNKSR3	4	0	-0.821614	1.6884e-13	0.729219	2.91077e-06	1.07839	4.83495e-06	-0.334382	0.0956194	non-dropout
MBOAT1	2	0	-0.630857	5.05439e-19	0.283157	0.008932	-0.0572882	0.818468	-0.383948	1.88159e-05	non-dropout
RNF217	2	0	-0.585047	1.84925e-09	0.917703	6.95304e-21	0.645398	0.00211795	0.0043536	0.974771	non-dropout
CYP1A1	1	0	2.21954	6.17362e-21	0.558841	0.0181217	1.98226	1.07844e-07	-1.28667	7.20468e-06	non-dropout
RUNDC3B	2	0	-0.233078	0.423846	-0.44104	0.0427995	0.0454295	0.931981	0.190901	0.386143	non-dropout
AMOT	7	0	-0.347897	2.75185e-07	0.325138	0.000306954	-0.295094	0.130104	-0.269399	0.0109173	non-dropout
ATP6V0E2	4	0	-0.0020695	0.990692	0.59688	0.000437135	0.29003	0.345877	-0.525058	0.0255614	non-dropout
AMZ1	1	0	1.01696	6.9054e-06	-0.72399	0.00386674	0.83049	0.0490697	-3.72646	1.41909e-15	non-dropout
NSUN5P1	16	0	0.118184	0.248663	-0.261344	0.032688	-0.218592	0.292682	0.0741101	0.519754	NA
ESCO2	12	0	-0.267954	0.00259394	-0.323104	2.37189e-05	0.140148	0.551086	0.81691	6.98715e-38	non-dropout
FAM84B	20	0	-0.634732	2.11848e-14	-0.566645	9.51621e-08	-0.0562605	0.823693	0.483648	1.46831e-08	non-dropout
VPS13B	5	0	0.0883731	0.179726	0.418986	1.90542e-09	-0.0348526	0.890362	0.23945	2.02645e-05	non-dropout
ERICH1	3	0	0.139379	0.0593623	0.328828	7.64922e-05	0.256993	0.176141	0.00513801	0.9527	non-dropout
CLVS1	1	0	0.654687	0.0646195	1.86235	1.13825e-16	2.85627	1.24415e-16	0.156635	0.696864	non-dropout
LCN6	1	0	0.264983	0.173738	0.88484	6.46999e-14	-0.117499	0.720407	-1.55219	1.63754e-07	non-dropout
TTLL11	1	0	0.221329	0.100783	0.620187	0.000103878	-0.0536523	0.869621	0.427937	0.0183006	non-dropout
HSD17B7P2	7	0	-0.103331	0.354194	-0.276875	0.0185059	0.31031	0.235841	0.0597796	0.627646	NA
KIAA2026	15	0	0.0596164	0.465303	0.404238	6.21448e-08	0.435422	0.00874214	-0.0770999	0.31287	NA
KIAA1958	8	0	-0.0211786	0.807629	-0.180809	0.0157424	-0.148642	0.43271	0.19656	0.00261275	non-dropout
PRUNE2	2	0	-0.0281692	0.786774	1.02385	2.03364e-32	0.276372	0.174371	-0.9031	4.04257e-21	non-dropout
ADSS	12	0	-0.0468015	0.630734	-0.338826	0.000552126	0.0998684	0.656448	0.361377	2.73185e-06	non-dropout
FAM122B	14	0	-0.128164	0.137764	-0.328486	0.000612692	0.233243	0.250934	-0.37799	2.4544e-07	non-dropout
USP54	2	0	-0.0479308	0.642576	-0.257094	0.00981211	0.0151792	0.958374	-0.0842226	0.45618	non-dropout
CYP51A1	16	0	-0.0330879	0.724043	-0.307361	4.50426e-05	0.0586993	0.811441	0.0734807	0.241444	non-dropout
AARS	16	0	-0.411338	1.02409e-12	-0.3661	6.2099e-07	0.0981044	0.617618	-0.284444	1.45312e-05	non-leukemia-specific dropout
DAB1	1	0	-0.154716	0.723302	0.634855	0.0259785	NA	NA	NA	NA	non-dropout
DAB2	49	0	-0.939189	4.83968e-15	-1.51599	1.73606e-16	0.0897321	0.80659	0.39741	0.00090323	non-dropout
TMTC3	8	0	0.0258279	0.843526	-0.253948	0.0162328	0.35538	0.0854977	-0.47137	3.07547e-05	non-dropout
DAG1	5	0	-0.0979351	0.271825	0.354932	0.000254357	0.0152792	0.951035	0.99068	1.86353e-42	non-dropout
DENND5B	1	0	1.02758	5.93307e-37	0.602291	7.49628e-08	1.1399	2.11215e-11	0.19912	0.100679	non-dropout
GRASP	6	0	-0.263786	0.241477	0.583578	0.0458206	-0.543534	0.200961	0.151822	0.456199	non-dropout
PPTC7	4	0	-0.128864	0.0463811	-0.250593	0.000301551	-0.193823	0.28726	0.0575088	0.372374	non-dropout
DGKH	1	0	-0.267891	0.00943297	0.20592	0.0464493	0.0560093	0.822533	0.0483282	0.456094	non-dropout
GPR180	3	0	-0.453026	1.39788e-06	-0.611947	5.84172e-08	0.150846	0.536267	0.271441	0.00199386	non-dropout
AP2A2	2	0	-0.00135964	0.990692	0.252385	0.016186	0.0559483	0.804112	-0.0912876	0.343334	non-dropout
DAP	4	0	-0.00702166	0.949038	0.304739	0.000236417	-0.120392	0.555016	0.117107	0.193769	non-dropout
TMEM229B	16	0	0.289113	0.0848082	0.722186	7.33504e-07	-0.484409	0.0499989	-2.02164	1.11883e-29	non-dropout
REM2	1	0	-0.297596	0.118249	0.431926	0.0219968	-0.000764299	0.998577	-0.338739	0.0753838	non-dropout
MDGA2	2	0	-0.647683	0.000916868	0.589715	0.00163821	0.709773	0.00396598	0.193197	0.224371	non-dropout
SAMD15	1	0	0.302615	0.363222	0.640898	0.0465124	-0.143335	0.808786	-0.427864	0.224243	non-dropout
EML5	1	0	-0.154291	0.355548	0.434831	0.000119756	0.580624	0.00264516	-0.213296	0.194462	non-dropout
DARS	3	0	-0.0666232	0.500504	-0.200237	0.0337657	0.00660778	0.980352	-0.73831	4.2614e-24	AF9 specific
SPRED1	13	0	-0.310864	2.16918e-05	-0.487381	1.9669e-12	0.218513	0.26815	-0.127922	0.170095	non-dropout
AP1B1	8	0	0.278432	0.000369466	0.429478	1.81289e-08	0.231007	0.212774	0.000920863	0.992164	non-dropout
SLFN5	1	0	-0.171216	0.134195	0.480199	4.55881e-06	-0.74731	0.000668511	1.76872	1.6453e-88	non-dropout
FBXO39	1	0	-0.792186	6.12394e-09	-0.440075	0.0373147	0.391574	0.289605	-1.1122	3.66486e-05	non-dropout
ZNF519	6	0	0.0893645	0.470794	-0.355224	0.00239466	0.327716	0.118463	0.772128	5.96938e-34	non-dropout
C18orf54	12	0	-0.350614	0.00441472	-0.679229	2.15231e-11	0.428294	0.0427496	0.197079	0.0475994	non-dropout
ZNF296	1	0	-0.21719	0.0466659	0.280886	0.0229946	-0.186927	0.39174	0.0267727	0.799983	non-dropout
ZNF791	6	0	-0.180818	0.0161302	-0.318862	2.28606e-05	-0.291685	0.0899909	-0.235017	0.00126434	non-dropout
ZNF709	2	0	0.11729	0.240631	-0.380051	6.93046e-05	-0.324257	0.138369	-0.689872	4.45589e-22	non-dropout
ZNF114	5	0	-0.0888599	0.539794	-0.468694	0.000808663	-0.0839197	0.744929	-1.27274	4.98755e-26	non-dropout
ZNF567	9	0	-0.304025	0.00199046	-0.450261	1.668e-06	0.0171843	0.949191	0.00805556	0.921429	non-dropout
ZNF781	2	0	NA	NA	0.773321	0.00777214	0.492302	0.373613	NA	NA	non-dropout
ZNF100	6	0	0.0829343	0.344968	-0.337914	2.74902e-05	0.276878	0.125708	0.227594	0.000122685	non-dropout
DENND1B	8	0	-0.0510809	0.633638	0.313212	0.000283182	0.997171	7.31109e-09	0.309627	5.48305e-05	non-dropout
TOR1AIP2	17	0	0.0926426	0.320197	0.237837	0.000912792	0.133011	0.508466	0.614154	1.66332e-29	non-dropout
IFNLR1	2	0	-0.0796235	0.658735	1.47061	2.16997e-31	1.88693	7.32786e-22	-2.35121	3.55213e-30	non-dropout
CNST	16	0	-0.359673	7.90945e-08	0.532835	7.96456e-18	-0.228217	0.208244	0.261426	0.000257582	non-dropout
GADD45A	15	0	0.0175525	0.912089	0.374043	0.00355408	-0.19335	0.448209	2.55749	4.81517e-191	non-dropout
LONRF2	1	0	0.231682	0.1717	-0.709099	4.49801e-07	-0.368658	0.229934	-3.4619	1.87309e-72	non-dropout
CCDC138	4	0	-0.227758	0.0672038	-0.316534	0.00748954	0.102615	0.698293	0.517294	1.0808e-09	non-dropout
UBXN2A	2	0	0.0138295	0.917248	-0.36768	0.000690094	-0.115828	0.644156	0.264941	0.00305306	non-dropout
PARP15	1	0	0.500318	1.33315e-12	0.294629	0.000338872	0.696105	5.64033e-05	-0.712434	2.76152e-18	non-dropout
DMXL1	3	0	0.0995858	0.151902	0.19712	0.0150569	0.303458	0.0774396	0.299389	4.13845e-05	non-dropout
RNF168	8	0	-0.0111421	0.887494	-0.286704	2.50558e-05	0.00949762	0.967497	0.413417	1.51839e-13	non-dropout
DHX9	13	0	-0.0844418	0.163286	-0.20411	0.00112795	-0.0630098	0.747768	0.39769	1.56586e-13	non-leukemia-specific dropout
DDX10	7	0	0.0544773	0.529252	-0.213457	0.0153711	-0.0607943	0.776265	-0.0307094	0.659448	non-dropout
DDX11	8	0	-0.0239083	0.802055	-0.229074	0.00357486	-0.246459	0.196077	-0.296636	4.23099e-05	non-dropout
PRICKLE2	1	0	0.356535	1.48111e-06	0.386299	5.46131e-06	0.470068	0.00820502	0.184328	0.0417834	non-dropout
SPATA5	3	0	0.0694233	0.412249	-0.202704	0.0088818	-0.12249	0.520284	0.0552534	0.45259	non-dropout
DHX15	2	0	-0.0523916	0.456662	-0.194311	0.00170491	0.00811785	0.97214	-1.02833	7.32119e-87	non-leukemia-specific dropout
DCLK2	1	0	-0.190699	0.0602642	-0.52764	0.000790078	0.408887	0.0551327	-0.475985	8.19782e-05	non-dropout
ADGRA3	2	0	-0.0321349	0.755273	0.346791	2.32905e-05	0.204342	0.266215	-0.168447	0.0356792	NA
UGT3A2	5	0	-0.827769	3.8975e-28	-0.733566	1.26184e-15	0.185339	0.372632	-0.815828	3.50122e-14	non-dropout
DCP2	8	0	-0.164891	0.135647	-0.282463	0.000412877	0.133062	0.548633	0.317092	1.44357e-07	non-dropout
ZNF366	3	0	1.65697	1.83653e-08	1.8803	4.69213e-05	NA	NA	NA	NA	non-dropout
DFFA	2	0	-0.0563139	0.571136	-0.303036	0.00890646	-0.126945	0.59084	-0.165556	0.046442	non-dropout
TIMM8A	14	0	-0.265522	0.00545053	-0.219268	0.0402304	-0.239357	0.267249	0.201511	0.0254746	non-dropout
TXLNB	2	0	0.586503	0.0177879	1.00613	6.81473e-07	0.0222463	0.973463	-0.472725	0.136226	non-dropout
ZNF92	3	0	-0.283734	0.0172694	-0.275675	0.0277834	0.169216	0.470866	0.783186	8.75141e-47	non-dropout
THAP5	3	0	-0.0604484	0.631993	-0.577395	3.24986e-10	0.223714	0.256225	-0.057224	0.489905	non-dropout
DFNA5	3	0	-0.439039	0.00293648	0.910982	1.13803e-09	-0.414853	0.112485	-2.63979	4.70849e-23	non-dropout
ZNF800	30	0	-0.233248	0.000115586	-0.179438	0.00655144	-0.182332	0.311651	0.302907	5.78743e-08	non-dropout
COCH	3	0	-0.51729	2.79559e-09	-0.2059	0.0300826	-0.257898	0.183971	-0.539559	2.23056e-12	non-dropout
QSOX2	1	0	0.28144	6.80619e-06	0.272359	0.000253302	-0.137952	0.493599	-0.03405	0.618572	non-dropout
ARX	1	0	NA	NA	1.77698	0.0014187	NA	NA	NA	NA	non-dropout
PWWP2B	10	0	0.441891	9.856e-05	0.308575	0.00481526	0.169848	0.452027	-2.15929	4.36303e-98	non-dropout
DHX36	22	0	0.092285	0.209562	-0.185035	0.0450853	0.254946	0.176218	-0.223693	0.000376567	non-dropout
ADAMTS17	2	0	0.103323	0.206484	0.968363	1.15897e-32	0.25476	0.261793	0.18935	0.0410327	non-dropout
ADAMTS18	1	0	0.539828	1.04411e-14	0.400797	7.54902e-06	0.353666	0.0635831	0.343756	0.0018476	non-dropout
ZNF525	1	0	-0.0992142	0.353685	-0.381963	1.48396e-07	0.0488597	0.822917	0.514031	3.60132e-17	NA
ZNF431	4	0	0.0968201	0.271605	-0.218047	0.0171654	0.324361	0.0817913	0.489869	2.22582e-15	non-dropout
SYNPO2	8	0	0.17743	0.592572	1.69215	4.8016e-14	-0.0745457	0.886693	-1.15026	0.000580178	non-dropout
SPTSSA	8	0	0.0509823	0.687596	-0.23891	0.0439036	0.177343	0.440177	1.32492	1.09106e-56	non-leukemia-specific dropout
DHCR7	6	0	-0.145241	0.236436	-0.269562	0.010083	-0.229396	0.260425	0.211929	0.0128545	non-dropout
DHCR24	4	0	-0.180944	0.00921677	-0.490006	2.67613e-09	-0.3331	0.0473029	0.470478	1.83914e-11	non-dropout
DHFR	5	0	-0.271492	0.000354991	-0.435255	4.68063e-06	0.0418995	0.880566	0.170255	0.0119261	non-dropout
DIAPH2	10	0	-0.0390176	0.663281	-0.223987	0.00729769	0.170225	0.393608	0.204727	0.00274125	non-dropout
2001-09-01	2	0	0.377604	0.000445506	0.464392	4.74238e-06	-0.286177	0.291296	-1.43509	5.01227e-20	non-dropout
DLAT	7	0	-0.0574185	0.503304	-0.244225	0.020873	-0.0859596	0.688171	-0.446101	2.6272e-09	non-dropout
DLG1	25	0	-0.379061	1.71964e-06	0.822966	9.54262e-31	0.127444	0.513993	0.0816742	0.218839	non-dropout
DLST	18	0	0.0160051	0.842787	-0.14749	0.040081	-0.0711902	0.717678	0.308297	1.90537e-07	non-leukemia-specific dropout
DLX1	6	0	-0.39754	0.0285417	-1.11417	0.00135393	-0.910304	0.0157775	-1.52129	4.13284e-12	non-dropout
AGA	2	0	-0.0870986	0.441583	-0.379603	0.00038035	0.299527	0.142438	0.737116	5.58978e-19	non-dropout
DMD	3	0	0.254541	0.219207	1.38133	1.74351e-09	1.79596	3.17026e-08	-0.689017	0.0249473	non-dropout
DNM1	9	0	0.162004	0.0630324	-0.738569	1.33431e-12	-0.531186	0.00348067	-0.412995	5.33419e-06	non-dropout
DMPK	3	0	0.0087078	0.949528	1.15743	2.1982e-37	-0.244177	0.259972	-0.530107	0.000168529	non-dropout
DMWD	10	0	-0.0570054	0.637407	1.14732	4.05711e-35	-0.449307	0.0341975	-0.484162	1.0809e-06	non-dropout
DNA2	1	0	-0.157696	0.0849928	-0.204684	0.0183917	0.261772	0.203997	-0.0342767	0.699069	NA
DNAH5	2	0	NA	NA	1.94173	4.52188e-12	0.548202	0.280476	NA	NA	non-dropout
DNAH6	1	0	0.0654281	0.658425	-0.531507	0.000276133	0.694917	0.0277317	0.271256	0.0758634	non-dropout
DNASE1	1	0	-0.121158	0.445348	0.441558	0.00853872	0.337182	0.29434	-0.230051	0.321159	non-dropout
DNASE1L1	3	0	0.13009	0.463074	0.563737	0.000911427	-0.277646	0.381631	0.332696	0.0870608	non-dropout
DNASE2	5	0	-0.258251	0.0445487	-0.511726	0.00224592	0.278209	0.331499	-0.357052	0.0104885	non-dropout
DYNC1I1	1	0	2.29825	1.10273e-22	2.58721	3.74775e-41	0.0139844	0.981401	0.573499	0.0637954	non-dropout
DYNC1I2	10	0	0.160993	0.0367008	-0.383195	0.000503087	0.377516	0.0639225	-0.163508	0.0744659	non-leukemia-specific dropout
DYNC1LI2	15	0	0.212808	0.000531118	-0.231817	0.00146841	0.276336	0.0990445	-0.029852	0.670116	non-dropout
DNM2	24	0	-0.294736	2.6853e-07	-0.182466	0.0221687	-0.427451	0.00712103	-0.0384658	0.596081	non-leukemia-specific dropout
TRDMT1	7	0	-0.16467	0.0994394	-0.312048	0.00957752	0.433022	0.035844	-0.0860446	0.394182	non-dropout
DNMT3A	29	0	-0.106925	0.102257	-0.179088	0.0224714	-0.380408	0.0205957	-1.51823	3.6152e-94	non-dropout
DNMT3B	12	0	-1.0108	2.98017e-32	-0.836096	3.31741e-15	0.0117912	0.968756	1.1846	2.58183e-34	non-dropout
DNTT	1	0	NA	NA	2.86943	1.74526e-09	NA	NA	NA	NA	non-dropout
DOCK1	4	0	0.314891	7.15044e-06	0.709505	2.37525e-14	-0.25826	0.225537	0.0946765	0.313595	NA
ABAT	1	0	0.345636	2.75749e-06	0.61806	5.01048e-10	0.141418	0.545383	0.454109	1.25226e-05	non-dropout
DPYSL2	31	0	-0.372933	2.28255e-10	-0.200781	0.0117235	-0.205437	0.281694	-0.411025	2.97793e-06	non-dropout
DPYSL3	2	0	-0.446735	2.75086e-08	-0.686538	2.44214e-14	0.185361	0.351127	-0.425654	8.65161e-06	non-dropout
DR1	5	0	-0.25678	0.000247792	-0.176074	0.0421321	-0.247406	0.158309	-0.0165974	0.833047	non-leukemia-specific dropout
JAG1	11	0	1.30169	1.89684e-05	1.71776	1.59811e-06	3.65387	7.5229e-08	NA	NA	non-dropout
DSC2	8	0	-0.0754734	0.722309	-1.6037	1.52273e-14	1.21088	4.14954e-05	-2.87376	1.35426e-32	non-dropout
RCAN1	13	0	0.237414	0.0422081	0.373749	0.0150904	0.424254	0.118239	-0.0571647	0.801202	non-dropout
TSC22D3	17	0	-0.242468	0.0399956	-0.334043	7.57727e-05	-0.278495	0.100932	0.00479102	0.957539	non-dropout
SLC26A2	3	0	-0.132584	0.104511	-0.302628	0.00017369	0.0784482	0.730945	0.478869	1.80656e-08	non-dropout
HBEGF	10	0	-0.689287	1.36124e-10	-0.347232	0.00130649	-1.32292	3.36363e-17	0.0452346	0.510155	non-dropout
DUSP1	28	0	-0.0216592	0.802213	0.401214	1.34414e-05	-0.440689	0.0225563	-0.13115	0.236403	non-dropout
DUT	2	0	-0.220581	0.00774924	-0.466869	2.82277e-10	-0.268431	0.133877	-0.0538315	0.464463	non-leukemia-specific dropout
TOR1A	7	0	0.0757736	0.430838	-0.235177	0.00964425	-0.073673	0.748403	-0.521998	7.34968e-10	non-dropout
GPR183	17	0	1.88047	9.3304e-68	0.476144	0.0309431	3.10643	6.52012e-31	-3.14585	6.72593e-34	non-dropout
ECE1	1	0	0.104911	0.477736	0.805145	1.98463e-09	0.711482	0.00224986	0.147501	0.34331	non-dropout
ECH1	5	0	-0.0386794	0.804262	0.77562	3.35383e-09	-0.129253	0.641484	-0.502794	0.00223876	non-dropout
ECHS1	2	0	0.234894	0.00277134	0.258309	0.00676491	0.0110987	0.970147	0.293049	0.000500866	non-dropout
ECT2	31	0	-0.272306	6.27735e-05	-0.282552	0.000770123	0.359062	0.0656985	-0.668238	6.97074e-26	non-dropout
EDA	6	0	-0.684274	2.05429e-13	-0.834564	1.47011e-05	0.0345796	0.918761	0.355312	0.00569112	non-dropout
ABCA1	6	0	1.28935	1.49317e-06	0.389364	0.0151978	2.3162	6.25844e-16	-0.418013	0.0771507	non-dropout
S1PR1	1	0	NA	NA	3.47685	7.2664e-24	NA	NA	NA	NA	non-dropout
LPAR1	4	0	-0.957544	1.70128e-20	-3.02973	3.46411e-37	0.317855	0.3298	-0.584151	0.00484321	non-dropout
PHC2	8	0	-0.195814	0.00210295	0.246475	0.010448	-0.457438	0.0117194	0.880515	2.44064e-49	non-dropout
PGAM5	5	0	-0.135575	0.0446006	-0.256297	0.0036024	-0.546766	0.00059756	-0.0819258	0.244167	non-dropout
EFNA3	1	0	-0.347553	0.0274045	0.489247	0.00246749	-0.776551	0.00362058	-0.0849789	0.53494	non-dropout
EFNA4	2	0	-0.10281	0.506591	0.338069	0.00978122	-0.701297	0.00129084	0.830977	5.88158e-20	non-dropout
EFNB1	9	0	-0.993968	1.31891e-28	-0.444316	0.00386674	-0.902929	3.96826e-05	1.08879	4.56166e-28	non-dropout
MEGF9	1	0	-0.213215	0.00668462	-0.212375	0.0218995	0.0373629	0.894486	0.0946216	0.254078	non-dropout
AAED1	1	0	0.26919	0.0333038	0.315585	0.0145397	-0.00184955	0.996318	-0.543475	1.07055e-05	non-dropout
ZNF367	35	0	-0.347931	5.43698e-06	-0.185824	0.023998	-0.153248	0.41886	-0.560397	7.04355e-25	non-dropout
AHR	12	0	-0.142116	0.110112	-0.339607	0.00018286	0.332134	0.0784951	1.19226	4.0982e-60	non-dropout
MPZL3	3	0	0.60585	1.87561e-08	0.585162	3.0063e-05	0.58361	0.0210943	-2.64772	3.34736e-38	non-dropout
RILPL2	8	0	-0.040103	0.710951	-0.430657	3.37633e-05	-0.376564	0.0407699	-0.123842	0.231742	non-dropout
DNAH10	1	0	0.0612201	0.892235	1.20442	0.000224356	0.149789	0.823351	1.19074	0.00597676	non-dropout
EIF1AX	14	0	-0.0118006	0.896741	-0.298469	9.02221e-05	0.0449484	0.832404	0.478704	6.96079e-19	non-dropout
PLBD2	13	0	0.703649	5.13652e-10	0.796714	1.3233e-06	0.473199	0.076831	-0.330432	0.0354423	non-dropout
EIF2S1	4	0	0.016758	0.837138	-0.394413	3.35906e-09	-0.0900826	0.638168	0.0630032	0.299031	non-dropout
ANO6	2	0	-0.541336	5.2536e-16	0.179372	0.0110684	0.0511311	0.808553	0.230791	0.000193368	non-dropout
PAOX	1	0	0.399287	0.015794	0.733785	4.86838e-06	0.526559	0.10845	-1.4413	1.9391e-05	non-dropout
FAM24B	1	0	-0.320186	0.0894158	-0.421237	0.0240679	0.199652	0.55794	-0.36238	0.0279138	non-dropout
EIF2S3	10	0	0.0568561	0.428116	-0.225461	0.000658067	-0.0725497	0.729633	-0.116814	0.0690125	non-dropout
DNM1P46	2	0	0.489332	0.0194605	0.548614	0.0150126	0.47645	0.197829	-0.216908	0.521731	NA
ZNF778	3	0	0.157492	0.0826865	0.288906	0.0113774	-0.208259	0.37317	1.02638	3.53427e-20	non-dropout
EME2	5	0	0.1792	0.120361	0.319211	0.0222343	-0.388428	0.154157	-0.524971	0.00951269	non-dropout
NLRC3	6	0	-0.432938	1.21579e-08	0.251555	0.00368349	-0.30761	0.0833042	-1.16296	2.70071e-57	NA
EIF4E	44	0	-0.10978	0.221117	-0.208349	0.0135234	0.00723919	0.981219	-0.481506	6.27357e-13	non-leukemia-specific dropout
EIF4EBP1	3	0	-0.582876	3.96335e-14	-0.975083	3.72037e-24	-0.22797	0.30817	-0.157028	0.145216	non-dropout
EIF4EBP2	6	0	0.0774662	0.251823	-0.172376	0.0153675	0.106248	0.577924	1.09139	1.12303e-85	non-dropout
SERPINB1	2	0	0.0331908	0.79537	0.364993	0.00254766	0.591367	0.00995031	1.00042	2.61802e-31	non-dropout
TTC21A	2	0	0.580937	6.46023e-05	0.780048	2.09295e-05	1.14507	0.00199309	-0.494792	0.0539932	non-dropout
U2AF1L4	3	0	0.552068	9.37576e-08	0.288137	0.0495122	0.160006	0.564788	-1.20301	3.00305e-12	non-dropout
FAM129C	1	0	0.380647	0.000719567	-0.683483	6.49841e-07	0.964382	8.07716e-07	-1.02971	3.6224e-08	non-dropout
A2M	23	0	0.0146398	0.952443	-2.38146	5.62891e-50	0.500247	0.0364772	-2.38834	1.50218e-41	non-dropout
ABCA2	5	0	0.437747	3.0595e-06	-0.225155	0.0242936	0.0895915	0.735736	-0.892195	1.8303e-26	non-dropout
NBPF11	1	0	-0.05448	0.611798	0.335155	0.0212585	0.520603	0.00391673	0.21525	0.0295934	NA
LINC00528	1	0	0.150727	0.169579	0.238936	0.0136902	-0.533205	0.0102231	-1.34095	9.31646e-25	NA
RNF215	1	0	0.444068	0.0265239	0.622618	0.0071994	0.324106	0.476252	-0.469132	0.234085	non-dropout
APOBEC3F	2	0	-0.0145162	0.884662	0.422042	3.12296e-05	-0.402492	0.0255536	-0.326457	9.75863e-05	non-dropout
FOXD4L1	1	0	-0.18964	0.522387	0.913802	0.00268855	0.675688	0.150772	0.582831	0.0930975	NA
ELK3	38	0	-0.313882	4.012e-05	0.857743	3.6175e-30	0.496596	0.00426794	-1.99541	3.61568e-150	non-dropout
SPRED2	14	0	-0.169032	0.0212387	-0.341531	6.22177e-07	-0.00766832	0.976441	-0.669812	3.00098e-25	non-dropout
ARL13B	4	0	-0.176761	0.283391	-0.396664	0.00982258	0.117121	0.68836	0.696731	7.068e-08	non-dropout
FBXO45	14	0	-0.173476	0.00750913	-0.455942	7.93737e-11	-0.245402	0.171876	0.433312	1.03167e-12	non-dropout
CENPV	1	0	-0.0846028	0.3284	-0.389602	5.5408e-05	-0.594672	0.00105947	-0.374685	2.60303e-06	non-dropout
FLCN	2	0	0.165569	0.0988567	-0.287383	0.00787196	-0.154619	0.483941	0.276989	0.00450928	non-dropout
EMP1	9	0	-0.442607	1.38051e-12	-0.913315	3.40939e-30	-0.414235	0.0129891	-1.51511	1.00463e-117	non-dropout
TRIM65	2	0	-0.0834626	0.319828	-0.223287	0.0165807	-0.126419	0.542449	-0.374203	1.45515e-06	non-dropout
UNC13D	11	0	0.0685424	0.688373	0.84399	3.51771e-14	0.378963	0.129824	-2.04444	1.64611e-20	non-dropout
SPNS3	12	0	-0.811693	3.16501e-13	-0.965404	0.000133683	1.19406	7.06432e-10	-1.80856	3.58224e-16	non-dropout
EMP3	14	0	0.186366	0.218629	-0.961237	1.53648e-26	0.19815	0.33202	-0.205732	0.00518109	non-dropout
HACD2	8	0	-0.288675	0.00473017	-0.305113	0.00603261	0.148896	0.575861	0.0485749	0.683125	NA
PDE12	5	0	-0.0587209	0.491861	-0.276203	0.000105707	-0.134477	0.467927	0.0133292	0.851568	AF4 specific
CTTN	2	0	1.81801	7.16697e-65	2.2184	1.00941e-109	2.37049	1.40327e-43	-3.32029	1.25971e-37	non-dropout
C4orf46	14	0	-0.0788911	0.369164	-0.444533	3.12723e-08	-0.100646	0.643821	-0.196359	0.00416091	non-dropout
TMEM154	17	0	-0.133571	0.253541	-0.495901	7.13763e-05	0.804687	0.000231641	-0.628051	1.13355e-10	non-dropout
SMIM14	9	0	0.977553	1.58603e-06	2.35967	9.6789e-61	2.53452	9.82695e-17	-0.241588	0.258965	non-dropout
RWDD4	2	0	0.0718276	0.644551	-0.352794	0.0117014	-0.0578454	0.841248	0.611725	3.42786e-09	non-dropout
PRIMPOL	1	0	0.0913441	0.616811	-0.304383	0.023379	0.174663	0.526865	-0.284339	0.0370084	non-dropout
DNAJC18	2	0	0.142693	0.351245	0.32919	0.00287347	0.364075	0.127492	-0.516743	6.92857e-06	non-dropout
ENG	8	0	-0.0190133	0.84285	0.534	8.46687e-10	0.0186627	0.94567	-1.78848	8.45425e-77	non-dropout
GAPT	19	0	0.603481	0.067186	1.12112	0.00767298	3.01318	5.77333e-16	NA	NA	non-dropout
ENO2	3	0	0.437981	0.000631195	0.603139	0.0123169	0.190013	0.56896	0.979517	1.1319e-13	non-dropout
SLC29A1	11	0	-0.213334	0.00324606	-0.446879	6.71974e-07	-0.41009	0.0271415	0.680011	8.98303e-20	non-dropout
HTRA4	1	0	0.521374	0.126153	1.03284	0.00999242	1.94199	9.06271e-05	NA	NA	non-dropout
C9orf72	4	0	0.146022	0.173236	-0.238164	0.0156184	0.507524	0.00613945	0.20328	0.00514201	non-dropout
FAM219A	14	0	1.24149	4.79484e-29	0.518476	0.000270282	-0.0754924	0.76831	0.360871	0.0113608	non-dropout
EPB41	27	0	0.0418756	0.584265	-0.236691	0.000966331	-0.158202	0.384852	0.03882	0.57271	non-dropout
VMA21	14	0	0.0391355	0.67364	-0.22109	0.0112416	-0.0515584	0.813195	-0.267559	8.78255e-06	non-dropout
EPB41L2	1	0	-0.166002	0.015539	-0.410803	4.99275e-08	-0.131997	0.510828	0.198337	0.00307713	non-dropout
STOM	12	0	0.1089	0.237798	-0.325167	2.39427e-05	-0.618404	8.44588e-05	-0.00657147	0.929108	non-dropout
EPHA1	4	0	NA	NA	-2.25491	1.99532e-05	0.0659717	0.93406	-2.30377	8.10274e-07	non-dropout
EPHA3	2	0	1.16058	6.37903e-10	1.84652	8.39562e-07	2.14021	1.48713e-11	NA	NA	non-dropout
EPHA4	1	0	0.615331	0.0119492	1.03929	0.00160271	1.61825	2.64668e-06	NA	NA	non-dropout
EPHB3	6	0	-0.226331	0.0100739	-2.18542	3.477e-24	1.30187	7.1754e-08	1.80477	4.93614e-49	non-dropout
SLC44A5	1	0	-0.204389	0.402289	0.754744	0.00283465	1.75358	0.000176743	0.294511	0.259522	non-dropout
AK4	6	0	0.554427	1.09311e-16	0.157343	0.0497652	-0.28696	0.13035	-0.668955	1.72524e-18	non-dropout
C2orf69	17	0	-0.280844	0.000674881	-0.540019	4.58231e-12	-0.198123	0.322152	0.200908	0.00105357	non-dropout
EPRS	8	0	-0.298915	0.000576627	-0.50071	1.00022e-13	0.210509	0.242632	-0.00462816	0.950092	non-dropout
EPS8	6	0	-0.281869	0.00742246	-0.430745	7.21386e-05	1.00354	1.06472e-07	0.547834	2.17057e-07	non-dropout
NR2F6	14	0	0.364352	7.46845e-06	0.249371	0.0216795	-0.253207	0.261703	-0.173031	0.130456	non-dropout
SLC36A1	14	0	0.313915	8.15798e-05	-0.257933	0.00501343	0.326011	0.0780726	0.167891	0.0996018	non-dropout
ERBB2	2	0	0.333948	4.15251e-08	0.234611	0.00747748	-0.0692085	0.744865	-1.98106	1.75021e-155	non-dropout
C6orf163	2	0	0.436949	0.00389885	0.44468	0.00349135	0.574503	0.0360224	0.0727977	0.612331	non-dropout
EYA4	2	0	-1.05185	1.01974e-39	-1.05437	7.17595e-23	0.372244	0.0731527	0.157126	0.0401269	non-dropout
DHRSX	1	0	0.0831529	0.569709	0.581704	4.55667e-05	0.0779949	0.800719	0.148489	0.396761	non-dropout
ERCC6	12	0	0.519718	4.65608e-09	0.780626	9.61003e-17	0.50222	0.0287959	-0.133109	0.252493	non-dropout
ERG	1	0	-1.28053	3.67561e-117	0.299623	2.99301e-07	-1.31928	3.28278e-20	-0.338184	9.00468e-07	non-dropout
ERH	13	0	-0.0486556	0.562674	-0.289674	0.000873833	-0.349363	0.047114	-0.0537918	0.459989	non-leukemia-specific dropout
AKT2	15	0	0.212855	0.00239986	0.283548	0.000837108	-0.179864	0.324662	-0.713237	5.63712e-24	non-dropout
FBL	16	0	0.0118484	0.913032	-0.319888	0.000329833	-0.364665	0.0382295	-0.00234272	0.981989	non-leukemia-specific dropout
ABCA3	4	0	0.0862522	0.705789	1.02729	7.89992e-16	0.496442	0.0635831	0.109741	0.667065	non-dropout
ESRRG	2	0	0.216276	0.594367	2.23328	4.80395e-08	NA	NA	0.143899	0.746939	non-dropout
ETF1	33	0	0.0395878	0.623354	-0.147947	0.0361656	-0.246184	0.139356	0.0915875	0.108204	non-dropout
ETFA	4	0	0.181927	0.0153517	-0.203646	0.0372489	0.156038	0.436516	0.15643	0.049989	non-dropout
ALAS1	8	0	-0.184885	0.00390311	0.26766	0.00445008	0.0528365	0.818468	1.03249	1.33111e-47	non-dropout
ETFDH	5	0	0.0210411	0.897635	-0.436723	0.00218218	0.234251	0.34759	-0.0200575	0.883961	non-dropout
ETV1	2	0	0.0563801	0.801858	-0.594202	0.00082647	0.877501	0.000972417	-0.885053	5.14866e-06	non-dropout
ETV5	17	0	0.0431452	0.703902	0.951918	3.94847e-42	0.0474032	0.841627	1.01541	2.31779e-31	non-dropout
EVI2B	11	0	-0.265368	0.000407759	0.36648	2.49436e-05	-0.130115	0.495603	-1.38925	7.73983e-100	non-dropout
EXT1	27	0	-0.216799	0.0741267	0.469673	1.65652e-06	-0.131366	0.598518	0.89003	2.63092e-22	non-dropout
EXT2	3	0	0.0337744	0.727081	0.187216	0.0456689	-0.201491	0.336037	0.0808843	0.487917	non-dropout
EYA1	1	0	1.26529	1.2547e-19	1.23272	5.10655e-22	2.35883	4.04266e-21	0.0842258	0.597013	non-dropout
ALCAM	18	0	0.0779659	0.418044	0.422085	5.16888e-07	0.433145	0.0236904	0.0770643	0.323518	non-dropout
EYA3	8	0	0.0473002	0.608033	0.194903	0.0325577	0.319796	0.0909164	-0.0975003	0.249364	non-dropout
EZH2	30	0	-0.210654	0.000364613	-0.263621	0.000744247	-0.120442	0.536615	0.24361	4.60893e-05	non-dropout
F2R	1	0	NA	NA	3.90944	2.81251e-58	1.0535	0.0600478	NA	NA	non-dropout
ABCD1	5	0	-0.165915	0.403879	0.509147	0.0140258	0.251205	0.593188	1.35175	6.74594e-09	non-dropout
F3	6	0	-0.639704	0.0624152	0.826129	0.0482424	0.806528	0.0750644	0.859933	5.62887e-06	non-dropout
ALDH1A1	4	0	-0.0873517	0.763689	1.58256	1.26807e-08	0.976393	0.0406402	-1.88913	7.49679e-07	non-dropout
FANCA	5	0	-0.160755	0.0112619	-0.212465	0.024537	0.224285	0.190005	0.0956804	0.205311	AF4 specific
FANCD2	10	0	0.0346659	0.677991	-0.267075	0.00171141	0.255878	0.144236	-0.691842	1.0077e-27	non-dropout
ACSL3	21	0	-0.335925	9.97719e-07	-0.231295	0.00338286	0.0897995	0.67856	0.933572	2.75885e-55	non-dropout
FAH	2	0	0.552163	9.4816e-07	0.366167	0.00673675	-0.0817004	0.787376	-0.71783	8.84525e-07	non-dropout
PTK2B	13	0	-0.11305	0.128886	0.174152	0.00607198	-0.116445	0.533862	-0.164753	0.0301911	non-dropout
FANCB	4	0	0.0115264	0.940057	-0.669182	1.82504e-14	0.246134	0.258227	0.164982	0.0495814	non-dropout
FANCG	9	0	-0.244555	0.00114421	-0.203205	0.0242456	-0.338716	0.077758	0.090708	0.280725	non-dropout
USP12	3	0	0.169263	0.0152895	-0.239326	0.00225275	0.28249	0.114189	-0.171042	0.0327874	non-dropout
FASN	13	0	-0.202015	0.0338257	-0.247854	0.0101442	-0.615423	0.000397265	0.512416	1.16548e-22	non-dropout
ZCCHC24	23	0	0.162427	0.102032	0.758766	2.25896e-11	1.19485	2.92912e-09	1.80144	2.52539e-41	non-dropout
UNC5B	7	0	-0.0098543	0.932734	-1.26623	5.08306e-20	0.388165	0.129466	-0.707905	3.58827e-16	non-dropout
STOX1	1	0	-0.446154	0.00564752	0.617066	2.5915e-05	0.514484	0.0749615	0.791227	4.44697e-05	non-dropout
TYSND1	4	0	-0.208363	0.00827412	0.342392	0.000277035	-0.337132	0.117021	-0.23607	0.0386439	non-dropout
ZNF25	5	0	-0.105695	0.420451	-0.260415	0.0471795	0.577407	0.0170976	-0.252306	0.0559388	non-dropout
SLC37A2	5	0	0.76922	6.9114e-06	0.719956	0.00661139	2.17263	4.22463e-11	NA	NA	non-dropout
TMEM136	1	0	0.686678	2.44613e-24	0.713972	2.02912e-19	0.275082	0.191433	0.0102781	0.936789	non-dropout
TPCN2	4	0	0.0802747	0.330049	0.637715	1.69953e-11	0.165318	0.438928	-0.345016	0.00068768	non-dropout
MPEG1	1	0	1.99635	5.01592e-29	0.732298	0.013131	4.95726	4.13735e-85	NA	NA	non-dropout
FBN1	1	0	0.0393199	0.755018	0.296135	0.00853483	0.617139	0.00141543	0.44174	0.00102195	non-dropout
DDIAS	8	0	-0.136062	0.100783	-0.614588	4.10091e-13	-0.101449	0.621337	0.6803	2.15172e-26	NA
SKA1	1	0	-0.30434	0.000111206	-0.445374	5.0372e-08	0.108328	0.676113	0.0319864	0.681438	non-dropout
DOK6	1	0	0.846129	0.00145897	1.95722	8.77892e-08	2.01555	0.000332	0.532056	0.164847	non-dropout
EFEMP1	2	0	NA	NA	1.90251	1.1203e-07	NA	NA	NA	NA	non-dropout
OTUD1	35	0	-0.604885	3.33402e-27	0.290442	0.00147561	0.316237	0.0598654	0.848377	1.56774e-31	non-dropout
FBP1	6	0	NA	NA	1.90206	0.000198954	NA	NA	NA	NA	non-dropout
RNF152	1	0	-0.837032	4.24972e-06	-1.13878	9.86998e-06	-1.55719	0.000716069	0.83761	0.00209667	non-dropout
CBWD5	6	0	0.18336	0.305544	-0.347753	0.0386394	0.120744	0.626552	-0.144125	0.181226	NA
ZNF438	1	0	-0.000427438	0.997555	0.285532	0.00878686	0.480462	0.0291449	0.174955	0.120362	non-dropout
2008-03-01	14	0	0.288414	0.000208107	0.270648	0.000232759	-0.136468	0.498729	-0.814835	2.71557e-22	non-dropout
HNRNPA3	31	0	-0.0489876	0.580179	-0.207432	0.0162955	0.19359	0.325449	-0.120837	0.0410898	non-dropout
ZNF485	6	0	-0.322553	2.04694e-05	-0.236916	0.00929946	-0.068009	0.773207	-0.89609	7.66671e-28	non-dropout
ALDH3B1	6	0	-0.143228	0.314271	-0.517627	0.00142144	0.779669	0.00224938	-0.82126	3.33201e-07	NA
REEP3	11	0	1.4495	2.31235e-40	-0.289978	0.00297925	1.12079	8.36137e-11	0.0139528	0.887286	non-dropout
FAM171A1	1	0	-0.0325325	0.865909	0.815533	1.51782e-11	0.910908	0.000106773	-1.0834	6.37154e-07	non-dropout
ARL5B	17	0	-0.0870651	0.3348	-0.354471	3.04815e-05	-0.0437769	0.845386	0.238946	6.78382e-06	non-dropout
LRRN4CL	1	0	-0.0287885	0.932397	0.689399	0.00853904	-0.240574	0.590261	0.455847	0.203989	non-dropout
HNRNPUL2	13	0	-0.099405	0.202655	-0.157292	0.0457253	0.0266668	0.912584	0.110891	0.113841	non-dropout
SKA3	1	0	-0.231515	0.0260794	-0.425746	6.4865e-05	0.234253	0.320165	0.488532	1.33901e-10	non-dropout
SPATA13	2	0	-0.0133626	0.895636	0.373805	1.22531e-06	0.122028	0.579476	0.0571419	0.597011	non-dropout
CPNE2	15	0	-0.352348	3.35221e-05	0.427983	0.0005643	0.0425315	0.890268	-0.465873	0.0011703	non-dropout
ADGRG5	6	0	0.337887	0.0514427	-1.80898	7.05577e-12	1.82333	4.14069e-17	-2.15347	1.46822e-20	NA
CCDC162P	1	0	-1.03034	2.87357e-20	0.575332	4.59623e-07	-0.402327	0.201093	-1.58943	2.16524e-17	NA
NT5DC1	3	0	0.0194466	0.886981	0.258655	0.0195657	0.211101	0.335779	0.472436	2.93468e-05	non-dropout
ZUFSP	3	0	0.0362051	0.729854	-0.237527	0.00735387	0.00906892	0.973547	0.129171	0.134788	non-dropout
C6orf223	16	0	-2.05064	1.81871e-07	-0.683765	0.0453715	0.725688	0.126421	-2.15751	1.92155e-07	non-dropout
C6orf89	6	0	0.107656	0.174794	0.199045	0.0164289	0.146576	0.48075	0.169076	0.0166343	non-dropout
LEMD2	10	0	-0.0648653	0.429052	0.230104	0.0215067	-0.0781469	0.742385	-0.647488	1.71803e-13	non-dropout
KDM1B	4	0	0.227016	0.00909639	0.854113	1.73145e-24	0.562277	0.00221659	0.320276	0.00190979	non-dropout
RBM24	2	0	NA	NA	3.52613	9.04367e-12	NA	NA	NA	NA	non-dropout
RNF182	1	0	NA	NA	1.00521	0.00687494	NA	NA	-1.95236	8.30546e-05	non-dropout
PHACTR1	3	0	0.464974	3.86982e-13	0.464274	1.11166e-07	0.880756	1.45821e-07	-0.794643	9.64566e-17	NA
FCGRT	11	0	0.136542	0.36152	0.402433	0.0113752	0.241189	0.338487	-1.45464	6.91616e-17	non-dropout
SMIM13	2	0	-0.142953	0.176517	-0.368816	1.92109e-05	-0.0662718	0.772575	0.0527444	0.479739	non-dropout
PPP1R35	1	0	-0.411247	0.000140731	0.27407	0.0238647	-0.634966	0.00881335	0.0703125	0.667065	non-dropout
SDK1	17	0	-0.84171	0.00198134	2.03256	1.41621e-06	1.39386	0.0127377	NA	NA	non-dropout
DAGLB	2	0	-0.428011	7.75068e-10	0.851804	1.52793e-24	-0.304859	0.115158	0.417854	3.6201e-06	non-dropout
MTURN	14	0	0.0501479	0.775373	1.66813	1.69854e-77	0.436493	0.152493	-0.415889	0.0134174	non-dropout
FDFT1	10	0	-0.151269	0.0576236	-0.345353	1.64686e-06	0.0310389	0.889271	-0.130683	0.0551664	non-dropout
KIAA1324L	1	0	0.201414	0.0222617	-0.18394	0.0423189	0.39432	0.0488944	-0.181197	0.0539938	non-dropout
FAM185A	13	0	-0.077148	0.792649	0.727849	0.0164289	0.535139	0.228311	-0.551855	0.193771	non-dropout
FBXL13	3	0	1.02206	0.000253739	1.01333	0.000537319	0.598571	0.211533	0.166032	0.649645	non-dropout
ATXN7L1	2	0	0.0747273	0.420697	0.349337	5.7151e-06	0.425461	0.0179249	0.0298475	0.749764	non-dropout
FDPS	8	0	-0.181806	0.0165955	-0.377908	0.000108788	-0.0318125	0.896555	-0.381122	2.82378e-05	non-leukemia-specific dropout
ZNRF2	2	0	-0.232592	0.0420903	0.244683	0.0169443	-0.121077	0.618958	-0.568738	9.24838e-08	non-dropout
FEN1	17	0	-0.166084	0.00974583	-0.385172	4.04548e-06	-0.382607	0.0260011	-0.00483861	0.949898	non-leukemia-specific dropout
ALDH3A2	6	0	0.449175	7.32263e-09	0.307427	0.000213136	0.527375	0.00362593	0.243144	0.00343933	non-dropout
FES	5	0	0.134144	0.145131	0.356412	0.00190485	0.0922481	0.726456	-0.809624	2.23809e-05	non-dropout
ABCD2	2	0	-0.518254	0.0104913	-0.842019	0.000410701	0.88999	0.00566379	0.524987	0.00402787	non-dropout
FGF5	2	0	-0.0613911	0.820978	0.988744	9.75105e-21	0.727706	0.000274559	-1.64335	7.02417e-61	non-dropout
FGF9	2	0	-0.182778	0.0138249	-0.339899	0.000111659	-0.159223	0.416805	-0.231437	0.000365578	non-dropout
FGF11	1	0	-0.354938	0.0376462	0.37562	0.0338381	-0.238153	0.567136	-0.907367	0.00738493	non-dropout
FGFR1	3	0	-0.288503	0.00199777	0.858385	7.97875e-35	-0.00614002	0.981219	-0.0633191	0.329583	non-dropout
FH	14	0	-0.139858	0.0921312	-0.463693	2.88241e-10	-0.290207	0.103102	0.948483	2.56804e-43	non-dropout
FHL1	2	0	-0.534029	1.64426e-12	-0.692675	1.02681e-21	-0.993706	1.1505e-11	-0.496802	3.13907e-12	non-dropout
CASC3	6	0	0.132802	0.1014	-0.157116	0.049153	-0.114961	0.544611	0.195527	0.00127255	non-dropout
NID2	1	0	NA	NA	2.60725	2.2782e-39	1.12385	0.0619206	NA	NA	non-dropout
RRAS2	4	0	-0.28412	0.00257181	-0.371752	0.00145811	0.00819919	0.979795	1.00787	2.158e-20	non-dropout
ITGA11	12	0	-0.368409	0.00778898	0.791155	1.92633e-05	0.788569	0.00970646	-0.797092	0.000633596	non-dropout
XRN2	6	0	0.0909459	0.173236	-0.246793	0.00132583	0.0395803	0.856322	-0.230766	2.73841e-05	non-leukemia-specific dropout
COPZ1	28	0	0.0457977	0.595332	0.22684	0.0106874	-0.294881	0.130104	-0.406636	5.11303e-06	non-leukemia-specific dropout
COPG1	5	0	-0.105806	0.143859	0.169473	0.0269685	-0.232235	0.186503	0.0508629	0.522715	non-dropout
RASA3	3	0	-0.184815	0.00794999	0.25835	0.00148064	0.207428	0.297393	-0.147148	0.0420117	non-dropout
HSPA4L	5	0	0.0665957	0.693249	0.344376	0.000200258	0.299649	0.130599	0.399608	1.64045e-07	non-dropout
ZNF652	18	0	0.38453	1.07461e-11	0.372469	3.79954e-09	0.197749	0.267182	-0.251218	8.35104e-05	non-dropout
RNF44	2	0	-0.129431	0.0973767	0.426106	9.25649e-09	-0.0704185	0.747747	-1.29347	8.92829e-79	non-dropout
DLGAP4	8	0	0.300299	0.00420699	0.537308	5.70316e-13	0.0403608	0.857732	-0.45741	1.67274e-10	non-dropout
RAB11FIP2	5	0	-0.0370104	0.714839	-0.284619	0.000168574	0.056045	0.795233	-0.769153	1.70996e-34	non-dropout
PPM1E	6	0	-0.484654	0.0494802	1.65008	2.44667e-22	1.35812	2.69866e-05	0.467107	0.0256319	non-dropout
FRMPD1	1	0	-0.4356	0.0399391	2.09542	1.14229e-40	-0.592105	0.130373	NA	NA	non-dropout
ANKRD26	4	0	-0.03383	0.799705	0.435764	0.000293699	0.371436	0.0692271	0.167327	0.117686	non-dropout
LMTK2	8	0	0.0527802	0.496079	0.190002	0.00897392	-0.126029	0.498517	-0.278754	6.33226e-05	non-dropout
NLRP1	1	0	-0.015367	0.892663	0.307801	3.37631e-05	0.236371	0.205952	-0.591019	1.52393e-13	non-dropout
CNKSR2	2	0	0.178301	0.113868	0.388225	8.99967e-05	0.2585	0.241702	0.254956	0.00675888	non-dropout
FKBP3	12	0	-0.234774	0.0149119	-0.31606	0.00116892	0.0613801	0.80293	0.54557	6.07324e-12	non-dropout
PPP6R1	10	0	0.0170533	0.880194	0.316671	7.24765e-05	-0.338395	0.0596964	-0.00757959	0.920644	non-dropout
PLEKHA6	1	0	0.402898	0.0446748	0.893558	0.00739051	-0.303978	0.541633	-0.286392	0.412542	non-dropout
INPP5F	1	0	0.324704	4.57679e-06	0.647531	8.81195e-16	0.53643	0.00240294	0.304122	0.0009434	non-dropout
FKBP4	5	0	0.00618008	0.980641	0.4688	0.0214818	-0.112176	0.756172	-1.25736	1.69872e-07	non-dropout
ANKRD6	1	0	-0.219204	0.252134	0.509992	0.00402313	1.06502	0.00148356	0.408989	0.0748812	non-dropout
CLSTN1	11	0	-0.270192	0.00019111	0.318052	4.34281e-05	-0.139642	0.462515	0.0972362	0.19752	non-dropout
WDR37	8	0	0.0251906	0.771828	0.234929	0.0029942	0.164468	0.373531	-0.0125547	0.879092	non-dropout
FKBP5	10	0	-0.0157137	0.852579	-0.164988	0.0328234	0.0143423	0.953384	0.287016	2.85707e-05	non-dropout
ZBTB1	31	0	-0.161217	0.0209693	-0.163631	0.033485	-0.159011	0.395683	-0.119844	0.0516304	non-dropout
DENND3	2	0	-0.431684	1.64337e-07	0.294497	3.3716e-05	-0.0277704	0.89603	-2.24456	0	non-dropout
ARSG	1	0	0.4055	0.0216812	0.711611	0.000163789	0.760002	0.00361021	-0.464272	0.136439	non-dropout
BTBD3	3	0	-0.14778	0.0542446	-0.345393	1.85619e-07	-0.13517	0.472866	-0.816969	7.50031e-25	non-dropout
SBNO2	14	0	0.178705	0.0580553	0.213428	0.0216024	-0.394355	0.0493902	-0.667425	1.52618e-16	non-dropout
TRAK1	1	0	-0.0652639	0.338373	0.284721	9.29648e-06	0.239802	0.149526	0.0133765	0.864505	non-dropout
KLRK1	1	0	-0.613576	5.01276e-05	0.368734	0.00348	-0.217249	0.505652	-0.12729	0.533418	non-dropout
NCBP2	8	0	0.0754005	0.349905	0.258706	0.000693291	-0.181549	0.312854	0.0680543	0.306307	non-leukemia-specific dropout
HABP4	2	0	-0.196338	0.319458	0.911495	5.33208e-05	0.621528	0.0749615	1.48625	2.22172e-13	non-dropout
SEPHS1	16	0	-0.00397301	0.967219	-0.349429	7.79881e-07	-0.119768	0.534316	-0.852107	2.9508e-35	non-dropout
RAB3GAP1	2	0	0.29178	1.91916e-05	0.34442	2.79874e-06	0.32178	0.0709191	-0.482093	4.44759e-12	non-dropout
SIRT2	11	0	0.240604	0.0869201	0.666173	0.00118058	0.406852	0.231053	1.86577	2.83984e-32	non-dropout
ELL2	19	0	-0.112672	0.393453	-0.296864	0.00758284	0.750014	0.000267893	1.91471	1.40369e-124	non-dropout
CCT5	5	0	-0.13325	0.0269073	-0.172671	0.00927933	-0.298462	0.0631339	-0.206467	0.000209467	non-dropout
FOXF2	5	0	-0.789938	3.5948e-08	0.851663	1.59198e-09	0.0110309	0.976855	-0.560001	0.00651443	non-dropout
TPX2	11	0	-0.492058	2.80442e-18	-0.186937	0.0133884	-0.146475	0.43122	-0.251104	0.000185624	AF9 specific
PAXIP1	4	0	-0.258344	3.91619e-05	-0.314742	4.04548e-06	-0.0635337	0.762952	-0.745298	1.4339e-28	non-dropout
NT5C2	2	0	0.178866	0.00714501	0.305894	0.00157076	0.284217	0.157609	0.309241	1.82984e-05	non-dropout
EFR3B	1	0	-1.17151	1.33783e-14	2.87756	7.45713e-110	-0.0488925	0.913428	0.816131	0.00580488	non-dropout
TCF25	8	0	0.283086	0.000325844	0.355281	0.000548646	0.254057	0.154057	0.247717	0.00477385	non-dropout
CEP131	3	0	0.104907	0.456026	0.503061	0.00020856	-0.181802	0.536076	1.12532	2.54884e-14	NA
CEP152	5	0	-0.158822	0.0463811	-0.37776	8.37308e-05	0.103069	0.635147	-0.116914	0.0577945	non-dropout
LIMCH1	1	0	0.776147	1.84645e-20	2.53619	3.00354e-150	1.59812	7.51442e-15	0.289409	0.0590496	non-dropout
DAAM1	11	0	0.445647	6.71164e-09	-0.665414	2.43e-13	0.536357	0.00274796	0.722866	1.09259e-17	non-dropout
PLCH1	1	0	-1.36383	5.81337e-26	-2.06372	2.09345e-63	-0.848004	7.84515e-05	-2.28219	8.94387e-38	non-dropout
RAB21	19	0	0.0439371	0.639695	-0.219858	0.00897856	-0.0831317	0.712404	0.310892	6.57692e-06	non-dropout
STK38L	15	0	-0.057343	0.47122	0.2958	0.000157441	0.544507	0.00471261	0.12671	0.0507086	non-dropout
PALLD	35	0	-0.269681	6.14363e-05	-0.571023	7.34753e-08	0.0276272	0.919358	-0.117479	0.168992	non-dropout
KDM4B	15	0	0.108908	0.192166	0.353268	3.04815e-05	0.11864	0.529766	-0.462111	6.68585e-10	non-dropout
MAST3	7	0	0.751838	3.18222e-40	-0.206682	0.0283649	0.438865	0.0102639	-0.227208	0.00334882	non-dropout
SAMD4A	1	0	-0.311139	2.90828e-05	1.3653	2.89329e-75	0.0377294	0.885393	-0.230201	0.0142777	non-dropout
WDTC1	20	0	0.280093	0.000133456	0.528758	4.11259e-08	0.0403733	0.887249	-0.116392	0.327856	non-dropout
PDXDC1	21	0	0.175109	0.00530095	0.394859	4.07709e-08	0.051135	0.804974	0.0174008	0.811775	non-dropout
TNIK	4	0	0.343312	0.150019	1.04867	9.72315e-06	0.741477	0.0228557	0.19412	0.458409	non-dropout
KIF21B	12	0	-0.731565	2.34244e-30	-0.801969	3.16749e-19	-0.0451882	0.827666	-1.18457	1.5682e-83	non-dropout
FNBP1	2	0	0.509299	1.47297e-13	0.566717	6.67594e-15	0.407043	0.0370409	-0.160703	0.0358191	non-dropout
SMG1	3	0	0.00253404	0.977343	0.209412	0.00148257	0.153586	0.387919	0.0861662	0.239147	non-dropout
FOXM1	18	0	-0.313829	5.86869e-07	-0.235702	0.00148032	0.0682894	0.758361	-0.872414	3.59955e-33	non-dropout
ZHX3	11	0	-0.149711	0.0351842	0.400527	4.52956e-06	-0.0579928	0.802497	0.0963496	0.242265	non-dropout
ENDOD1	4	0	0.208392	0.0595974	0.661473	3.61106e-15	0.870565	8.77482e-06	1.14197	1.34449e-40	non-dropout
ZSWIM8	7	0	0.473117	1.71798e-10	0.272525	0.00467951	-0.0581657	0.809926	0.379013	8.84691e-05	non-leukemia-specific dropout
CLUAP1	12	0	0.18721	0.075529	0.364026	0.00269359	0.130042	0.625233	-0.0341781	0.84608	non-dropout
TBC1D9B	5	0	-0.0253968	0.781457	0.351235	3.47409e-05	-0.215129	0.269087	-0.39278	2.92113e-07	non-dropout
GGA2	3	0	0.264431	2.45217e-05	0.312535	9.63866e-07	-0.125838	0.491572	0.245267	0.00011994	non-dropout
SETX	4	0	0.100778	0.114777	0.33248	1.88095e-08	0.110255	0.55868	-0.385954	4.17756e-11	non-dropout
CAND2	1	0	-0.27179	0.298272	0.726903	4.01977e-05	0.588854	0.106927	-1.2646	0.000465629	non-dropout
HECW1	2	0	0.0993537	0.364911	0.327436	0.00482187	0.953293	2.31632e-08	0.344918	0.00790597	non-dropout
UHRF1BP1L	5	0	0.00301978	0.97602	-0.231556	0.00329896	0.132719	0.545687	0.132978	0.0989895	non-dropout
SWAP70	12	0	0.411137	1.61151e-08	0.351166	0.000280818	0.670318	0.000555464	-0.35696	3.1156e-05	non-dropout
MYCBP2	6	0	-0.0201014	0.785079	0.230509	0.000682341	0.12402	0.513837	0.168338	0.00597324	NA
VWA8	9	0	0.166639	0.0250689	0.293036	0.000179052	0.14082	0.478521	0.299053	1.26196e-05	non-dropout
KDM4C	20	0	0.202644	0.00147591	0.475058	6.95317e-12	0.127622	0.514848	0.242065	0.00020089	non-dropout
PPRC1	4	0	-0.0735752	0.346022	-0.179623	0.0148627	-0.33887	0.0351101	-0.40721	7.41996e-12	non-dropout
ERC1	2	0	0.0188315	0.806141	0.139895	0.038365	-0.00821799	0.972331	0.228422	6.73661e-05	non-dropout
TRIM35	2	0	-0.109283	0.118206	-0.428687	2.99301e-07	-0.379289	0.0324151	-0.0177843	0.845165	non-dropout
PEG10	1	0	-0.334318	2.15523e-05	0.660527	5.58077e-16	0.106839	0.613326	0.46795	1.59562e-13	non-dropout
SIPA1L3	14	0	0.160303	0.0178509	0.310599	0.00185708	-0.164712	0.429481	0.326628	6.19527e-06	non-dropout
KIF1B	9	0	0.141921	0.0432382	0.244879	0.00190808	0.0781852	0.727197	0.232656	0.000151594	non-dropout
AKR1B1	6	0	-0.201109	0.0141547	-0.192175	0.0493744	-0.429815	0.0189745	0.182035	0.0253534	non-dropout
MCF2L2	2	0	NA	NA	1.66373	7.40315e-07	0.329539	0.554937	NA	NA	non-dropout
TBC1D2B	3	0	-0.109222	0.200976	0.20054	0.0241651	0.20014	0.309904	0.0149327	0.897838	non-dropout
RAP1GAP2	1	0	-0.573145	3.35241e-16	0.222047	0.0352353	0.879753	7.69813e-08	0.253554	0.00176017	non-dropout
DDN	2	0	-0.123238	0.155841	-0.588132	9.47625e-08	-1.2553	2.03663e-11	-0.469103	1.82879e-08	non-dropout
CUL9	4	0	0.353624	1.60525e-07	0.377219	0.000114103	0.00891205	0.973136	-0.130571	0.196261	non-dropout
CLASP2	9	0	0.266476	0.000150234	0.306969	1.04981e-05	0.612359	2.90766e-05	0.152848	0.0206678	NA
CAMTA2	16	0	0.0178239	0.877086	0.28737	0.00406271	-0.0319716	0.900396	-0.643217	1.22402e-06	non-dropout
POGZ	31	0	-0.0365405	0.600906	0.364244	6.99448e-11	0.0948853	0.608216	-0.169697	0.00401907	non-dropout
PLXND1	4	0	0.511735	3.27675e-10	0.192641	0.032443	0.576214	0.000668422	-0.464829	1.09438e-06	non-dropout
KDM6B	2	0	0.521184	2.2238e-08	-0.339915	0.00225663	-0.313898	0.0897619	-1.30605	8.53834e-72	non-dropout
FLII	6	0	0.31079	0.000111336	0.456104	2.08904e-05	-0.20255	0.367883	-0.212145	0.0503313	non-dropout
ZZEF1	9	0	-0.00899004	0.906701	0.235531	0.000727348	-0.0601999	0.776108	0.104506	0.0944179	non-dropout
ANKLE2	4	0	0.054361	0.423412	0.250596	0.000119536	-0.00405328	0.986666	-0.572517	1.8879e-18	non-dropout
DCUN1D4	11	0	0.00156928	0.990807	-0.417864	3.64797e-05	0.0816791	0.727001	0.111683	0.164059	non-dropout
LRCH1	17	0	-0.318908	2.56145e-06	-0.209545	0.00966398	-0.164014	0.43122	-0.145246	0.0356447	non-dropout
SSPO	1	0	-0.140267	0.716226	1.026	0.023784	NA	NA	NA	NA	NA
FCHO1	7	0	0.261112	0.00613637	0.411832	1.56683e-07	0.278085	0.136366	-1.30691	5.72545e-43	non-dropout
FRMD4B	1	0	0.133198	0.0386717	0.861928	6.69325e-41	0.23967	0.173101	0.152161	0.0116687	non-dropout
GRAMD4	2	0	0.284907	8.78565e-05	1.57509	1.2221e-87	1.28961	4.20698e-12	-1.78313	1.33604e-47	non-dropout
CLCC1	6	0	0.564093	2.04113e-11	0.402969	0.000916274	0.701945	0.00148484	0.160156	0.0588922	non-dropout
TBC1D9	3	0	-0.410687	4.7707e-10	-0.723696	1.04477e-20	0.549799	0.00215408	-0.350483	1.35084e-05	non-dropout
FLNA	4	0	-0.125181	0.150077	-0.585435	5.74384e-11	-0.443905	0.0207913	0.636914	2.24912e-28	non-dropout
MAPK8IP3	7	0	0.126509	0.192191	0.408652	1.86934e-05	-0.226963	0.284646	0.102002	0.288866	non-dropout
NUP205	4	0	0.0194389	0.79998	-0.339384	3.01264e-08	0.109353	0.541265	-0.618247	1.74191e-24	non-dropout
RTF1	7	0	-0.00282226	0.976751	-0.178434	0.0404002	0.120208	0.582105	0.428447	1.19803e-11	non-dropout
SLC35D1	5	0	0.293769	1.24804e-05	0.216276	0.00263053	0.470584	0.00288044	0.341363	7.86143e-07	non-dropout
FLNB	3	0	0.122549	0.132075	0.182482	0.0190746	0.449443	0.00998274	0.436282	8.78487e-11	non-dropout
METAP1	1	0	-0.179805	0.0328228	-0.196273	0.0194385	0.107298	0.610454	-0.121657	0.0616081	non-dropout
LPIN1	2	0	0.0322776	0.664032	0.332704	6.51977e-09	0.0304594	0.889914	-0.145198	0.012983	non-dropout
2008-09-01	14	0	-0.0134235	0.924833	0.411166	1.87333e-05	0.305886	0.204563	-1.93533	7.85284e-52	non-dropout
PASK	3	0	0.104625	0.26333	-0.235347	0.00672277	-0.0240314	0.929555	-0.766415	1.92073e-10	non-dropout
RFTN1	11	0	-0.170161	0.00831383	0.463128	2.30727e-12	0.293674	0.102853	-0.394643	2.09498e-09	AF4 specific
RCOR1	6	0	-0.0515171	0.529369	0.148275	0.034999	0.077015	0.692192	0.366697	2.29073e-05	non-dropout
FLOT2	18	0	0.146122	0.0677017	0.265628	0.00303257	0.192867	0.353607	-0.627588	3.21605e-07	non-dropout
UBXN4	17	0	0.321528	6.54975e-07	-0.190556	0.0135871	0.230231	0.214955	0.348184	3.80087e-09	non-dropout
CYFIP1	14	0	0.497443	1.67074e-21	0.40002	5.62315e-10	0.256639	0.141603	-0.0352516	0.627285	non-dropout
ATG4B	2	0	0.185547	0.0117389	0.334852	0.00044479	0.105395	0.631355	0.569085	1.92111e-11	non-dropout
FBXL7	1	0	-0.192124	0.152708	0.44409	5.08725e-05	0.311318	0.241814	0.279664	0.0590302	non-dropout
PSME4	9	0	0.175198	0.00470745	-0.183868	0.0245846	0.0474128	0.823693	0.186824	0.00138986	non-dropout
ATP11B	6	0	-0.124881	0.123371	0.161378	0.0434632	0.155692	0.419316	0.383335	2.1614e-09	non-dropout
FAM168A	2	0	0.0750963	0.403879	0.211953	0.00783692	0.028123	0.906862	-0.0423696	0.574571	non-dropout
PLEKHM2	1	0	0.115896	0.296848	0.330372	0.000281556	-0.146774	0.485819	0.102283	0.172737	non-dropout
JMJD6	9	0	0.0374089	0.738238	0.403918	4.70566e-07	-0.411432	0.0222565	0.173433	0.046319	non-dropout
TBC1D1	14	0	-0.164911	0.00897302	0.482988	3.391e-15	0.199446	0.233519	-0.138028	0.0236986	non-dropout
DTX4	1	0	1.35012	3.47213e-48	0.349893	3.17895e-05	2.37014	1.59359e-56	-1.56907	5.58491e-65	non-dropout
RHOBTB2	11	0	0.283542	0.000353786	1.23618	3.86484e-33	0.424451	0.0756679	-0.459499	3.91453e-05	non-dropout
SYNE2	5	0	-0.123557	0.10902	0.203567	0.0167858	0.0838021	0.731225	0.25043	0.00010384	non-dropout
PLCL2	1	0	-0.118347	0.0919046	0.279232	0.000280943	0.40471	0.0188959	-0.261326	0.0014273	non-dropout
ARHGEF9	9	0	-0.112141	0.171884	0.307519	0.000595673	0.0782216	0.741775	-0.226353	0.0122942	non-dropout
SEL1L3	18	0	0.22887	0.0255738	0.870366	5.01754e-16	1.6885	1.15724e-22	0.136844	0.217467	non-dropout
DNAJC9	2	0	-0.231875	0.000413684	-0.333791	1.57158e-06	-0.173148	0.337139	0.569032	6.17542e-23	non-leukemia-specific dropout
SIK2	8	0	0.0816247	0.274813	0.483209	2.43203e-12	0.513171	0.000947049	0.36643	2.85164e-06	non-dropout
PLCB1	3	0	0.26879	0.0993019	2.30805	2.72058e-118	2.7077	9.76883e-42	0.16766	0.315789	non-dropout
PACS2	2	0	0.104823	0.233884	0.329459	0.000335884	0.215759	0.311221	-0.0174356	0.870475	non-dropout
ANKRD28	42	0	-0.158023	0.0280052	0.272476	0.000209378	0.524024	0.00139652	-0.289171	2.58451e-06	non-dropout
PDS5A	7	0	-0.210937	0.00362091	-0.148547	0.0257387	0.14414	0.407062	0.0827175	0.153181	non-dropout
KIAA0556	11	0	0.160494	0.046184	0.273238	0.00104431	-0.166457	0.436872	0.381327	7.94765e-06	non-dropout
ATP11A	4	0	-0.0772372	0.311522	0.18155	0.0101393	-0.141539	0.449373	0.185821	0.00326765	non-dropout
MTCL1	1	0	-0.449839	2.05403e-07	0.762857	1.31586e-18	0.314747	0.117049	0.0862516	0.566519	NA
DENND5A	13	0	0.193687	0.0245265	-0.23014	0.00168651	0.0967558	0.623388	-0.241509	0.00012422	non-dropout
DDHD2	1	0	-0.0440248	0.625581	-0.382154	7.22965e-07	0.229288	0.21469	-0.156	0.0174424	non-dropout
EXOC7	2	0	0.227755	0.0049772	0.301389	0.00150908	-0.182687	0.419616	-0.199055	0.0275992	non-dropout
ADGRL2	9	0	0.595839	0.00199046	2.09966	3.59994e-27	3.23738	9.46117e-41	-0.0690761	0.81625	NA
DNMBP	4	0	-0.189188	0.0118098	0.611632	2.58008e-15	0.106806	0.629776	0.307425	6.55759e-05	non-dropout
TSPYL4	5	0	-0.0596264	0.46264	-0.218692	0.00376123	-0.329831	0.0526927	-0.020518	0.816145	non-dropout
CAMSAP2	10	0	-0.179644	0.0378091	-0.183171	0.0249709	0.0842589	0.698403	-0.709055	8.77425e-27	non-dropout
CLEC16A	3	0	0.0421081	0.668095	0.230914	0.00424043	0.0837419	0.688847	0.404082	6.82157e-08	non-dropout
NUP160	7	0	0.027694	0.721139	-0.21427	0.00717756	0.118944	0.534864	-0.259158	8.3652e-06	non-leukemia-specific dropout
WWC1	1	0	0.19808	0.317413	0.49547	0.0078045	0.327992	0.249436	-0.0812506	0.68211	non-dropout
IQCE	3	0	0.60578	4.79994e-05	0.804337	1.06765e-06	0.707752	0.00840282	-0.580475	0.0274513	non-dropout
FMO4	1	0	0.812843	5.02994e-06	0.898236	5.52832e-06	0.85865	0.0183305	-1.21052	1.54072e-05	non-dropout
ANKS1A	20	0	-0.0750419	0.324027	0.472428	2.27498e-09	-0.0110297	0.966377	0.162049	0.0554568	non-dropout
MGRN1	7	0	0.165672	0.0219498	0.320802	0.000399383	0.140643	0.481186	-0.398359	2.77328e-07	non-dropout
BICD2	5	0	-0.181276	0.00529427	-0.228512	0.00489326	-0.278877	0.101116	-0.0855825	0.219887	non-dropout
NEMP1	17	0	0.0254282	0.822933	-0.370934	1.26651e-05	0.419864	0.018687	0.0651586	0.430799	NA
ICOSLG	3	0	0.120405	0.198935	0.97568	7.64667e-21	0.760929	1.5581e-05	-0.491573	7.48577e-07	non-dropout
FMOD	10	0	0.935683	1.10097e-17	1.78599	3.7611e-15	0.935512	0.00855537	-2.41279	3.15114e-10	non-dropout
KIAA0930	9	0	-0.122671	0.0643554	-0.163784	0.0490194	0.106115	0.586904	-0.276199	0.00040259	non-dropout
FMR1	10	0	-0.0719344	0.46278	-0.348846	0.000149867	0.200915	0.33875	-0.0542651	0.461911	non-dropout
TRIM2	1	0	-0.343376	0.105496	2.6568	5.98246e-80	1.63292	2.29592e-08	0.310388	0.451639	non-dropout
MAN2B2	1	0	0.16457	0.057762	0.25421	0.0110171	-0.262459	0.233762	0.186407	0.0629078	non-dropout
TBC1D30	5	0	0.709659	1.04812e-16	0.868887	1.33969e-28	0.191069	0.486815	-0.837684	1.4029e-17	non-dropout
TTC28	1	0	-0.402582	9.00069e-09	0.607752	9.81739e-18	-0.201429	0.282464	0.207026	0.00114293	non-dropout
SZT2	3	0	0.0661545	0.412249	0.212751	0.00767586	0.00722202	0.976855	0.366568	5.48304e-08	non-dropout
WDR7	8	0	0.205132	0.00152587	0.182506	0.0181229	0.123027	0.555396	0.395174	1.52689e-09	non-dropout
JADE2	19	0	0.54752	1.96209e-17	0.554134	6.2917e-14	-0.00183816	0.99489	-1.31551	4.07748e-44	non-dropout
VPS39	6	0	0.109581	0.144087	0.152995	0.0373147	0.0719611	0.730223	0.383752	2.47731e-08	non-dropout
AFF2	4	0	NA	NA	2.174	2.67154e-10	1.76869	0.000685852	NA	NA	non-dropout
ESYT1	16	0	0.183741	0.0341271	-0.265661	8.72705e-05	-0.049402	0.815262	0.449616	8.51713e-16	non-dropout
SYNE1	4	0	0.297194	0.000162565	0.798611	2.01778e-22	0.183144	0.381469	0.25216	0.00719066	non-dropout
DOCK9	1	0	0.0784882	0.85541	3.66033	4.92472e-113	0.113946	0.801338	NA	NA	non-dropout
FN1	23	0	1.59347	3.99324e-49	-0.859524	0.000280446	1.90136	9.53057e-12	0.810047	0.000182461	non-dropout
U2SURP	3	0	0.141029	0.0570547	-0.326258	3.4488e-05	0.204502	0.275492	-0.326323	1.65885e-09	non-leukemia-specific dropout
KHNYN	5	0	0.1142	0.150054	0.483671	2.48517e-11	0.0922794	0.647374	0.0844739	0.287558	non-dropout
UBR4	17	0	0.0779392	0.264733	0.140814	0.0385786	-0.129645	0.481608	0.388548	9.61631e-12	non-dropout
SUN1	1	0	-0.023984	0.790189	0.290986	0.000779418	0.289981	0.136249	0.354127	0.000488543	non-dropout
VPS8	15	0	0.243744	0.000973552	0.215322	0.00915223	0.212502	0.275784	0.29634	0.000425191	non-dropout
USP24	2	0	0.0977563	0.115633	0.214181	0.000951962	0.191868	0.262856	-0.79268	9.58887e-39	non-dropout
PSD3	2	0	0.0443449	0.541521	0.574924	8.20471e-17	0.139308	0.452388	0.238057	1.24038e-05	non-dropout
ARHGEF12	10	0	0.236101	0.00123922	0.37085	2.60441e-08	0.0393546	0.856984	0.00649852	0.926552	non-dropout
PPP1R13B	3	0	0.465857	1.5952e-05	1.30244	5.98468e-14	1.08964	4.86073e-05	1.54754	2.83885e-11	non-dropout
PUM2	1	0	-0.0728752	0.360044	-0.16809	0.0246435	0.192379	0.289852	-0.441121	1.93128e-15	non-dropout
ARHGEF18	4	0	0.114379	0.150087	0.312072	0.000479076	0.596058	0.000410321	0.415104	2.51905e-06	non-dropout
CRTC1	19	0	0.164373	0.050166	0.204	0.039369	-0.0255842	0.919349	0.166695	0.0639552	non-dropout
SMG5	2	0	0.047961	0.580822	-0.169403	0.0121619	-0.260709	0.119856	-0.151157	0.0107528	non-leukemia-specific dropout
AHCYL2	22	0	0.195794	0.13429	0.437855	0.000220648	0.384053	0.10987	0.394461	0.00105055	non-dropout
MAU2	3	0	-0.0168606	0.848471	0.170238	0.0441691	-0.0422749	0.845705	-0.389098	2.53906e-08	non-dropout
NUDCD3	11	0	-0.0640111	0.464247	0.263777	0.00298649	-0.00808301	0.976855	-0.180721	0.0747941	non-leukemia-specific dropout
SIK3	13	0	0.087669	0.199404	0.193426	0.01348	0.31439	0.0526927	0.380108	6.77361e-09	AF9 specific
MED13L	34	0	-0.447932	1.09951e-17	-0.363952	6.78536e-11	-0.144284	0.397684	0.177819	0.000597049	AF4 specific
ZDHHC17	20	0	0.131855	0.162131	-0.277196	0.00941526	0.216974	0.282835	-0.457768	8.41044e-07	non-dropout
PIP5K1C	6	0	-0.0646384	0.441195	0.245293	0.00605855	0.0189773	0.945422	0.436086	2.47542e-05	non-dropout
NCAPH	6	0	-0.221055	0.000349311	-0.34874	2.5239e-07	0.0145668	0.953384	0.190277	0.00148712	non-dropout
EXOSC2	15	0	-0.103829	0.170604	-0.246378	0.000347642	-0.13088	0.472313	-0.0827049	0.211306	non-leukemia-specific dropout
SIRT5	3	0	0.237397	0.0944104	0.334861	0.00212981	0.518689	0.0163485	-0.0992682	0.492991	non-dropout
SIRT1	12	0	-0.156076	0.0228538	-0.346001	4.65481e-07	0.149086	0.441842	1.40339	2.20282e-150	non-dropout
ZFPM2	1	0	-0.93225	3.10563e-08	0.966686	3.03973e-15	-0.263818	0.324272	0.370955	0.0150045	non-dropout
MLYCD	2	0	0.0885972	0.414195	0.423224	8.4862e-06	0.132375	0.558366	0.480275	4.77639e-05	non-dropout
ITGB3BP	10	0	-0.039193	0.790035	-0.323848	0.00451937	0.270125	0.254581	0.0449018	0.671976	non-dropout
TDRD7	10	0	-0.000293076	0.998011	0.260696	0.0027258	0.214577	0.353434	-1.36503	1.9783e-37	non-dropout
GRIP1	1	0	-0.468769	1.24998e-05	-0.465856	7.67501e-07	-0.591737	0.00155916	0.402495	5.274e-05	non-dropout
SLC7A8	15	0	-0.155579	0.504133	0.646809	0.0376971	0.58175	0.116101	-0.225565	0.512592	non-dropout
AP4E1	9	0	0.106311	0.243768	-0.232199	0.00287915	0.255624	0.184445	-0.149308	0.023234	non-dropout
TARDBP	6	0	0.0087403	0.913943	-0.151856	0.017811	-0.0305985	0.885393	0.360792	1.14327e-10	non-dropout
SLC35A3	5	0	0.0396575	0.759124	-0.322275	0.00562931	0.277263	0.279837	0.0342932	0.69919	non-dropout
SF3B3	5	0	-0.116414	0.0386356	-0.171839	0.00349135	-0.116813	0.513495	-0.424094	1.8574e-15	non-leukemia-specific dropout
ANGPTL2	2	0	-0.107314	0.519655	-0.387499	0.000540243	0.194072	0.388399	-1.30247	1.88736e-32	non-dropout
ABCB10	6	0	-0.462171	2.23258e-06	-0.283794	0.00201781	0.428759	0.028037	0.223021	0.0256422	non-dropout
ICMT	9	0	-0.199805	0.000735205	-0.388133	8.19488e-07	-0.302256	0.0831684	0.0949813	0.136314	non-dropout
PHF3	2	0	-0.0976985	0.17403	-0.186731	0.0215103	0.0894983	0.670022	-0.179472	0.00167608	non-dropout
TGDS	3	0	-0.105925	0.424411	-0.374037	0.00200505	0.0619228	0.827666	0.590053	2.38608e-10	non-dropout
LEPROTL1	17	0	-0.109428	0.136776	-0.27162	0.000727348	-0.193071	0.308514	-0.690433	2.55487e-28	non-dropout
CBX7	9	0	0.431997	1.6291e-05	0.619334	6.1913e-07	-0.251434	0.346148	-0.784294	5.94095e-05	non-dropout
MACF1	6	0	-0.0330164	0.613648	0.449185	1.49579e-13	-0.0183709	0.931981	0.0599739	0.351992	non-dropout
TMEM131	22	0	0.0681749	0.327956	0.538874	8.86693e-17	0.171005	0.340683	0.193363	0.00326718	non-dropout
TTC9	2	0	-0.469256	0.00680824	1.95269	2.57137e-18	1.16119	0.00247672	-2.17264	5.03558e-07	non-dropout
NUP188	13	0	0.100948	0.108539	-0.203628	0.00366674	-0.13143	0.466503	0.138792	0.0306067	non-dropout
SUZ12	23	0	-0.148594	0.0382481	-0.288974	1.43897e-05	0.1904	0.318984	0.0166314	0.808644	non-leukemia-specific dropout
MORC3	13	0	-0.0907105	0.291844	-0.358917	3.0473e-06	0.297193	0.135377	0.645917	1.32474e-28	non-dropout
SLC39A14	7	0	-0.0502562	0.500818	-0.261535	0.000959184	-0.219412	0.244899	0.231449	0.000407621	non-dropout
SKIV2L2	10	0	0.0858687	0.206744	-0.168703	0.0276757	0.142958	0.446265	-0.410928	4.86387e-12	non-dropout
KAT6B	2	0	0.122564	0.0545825	0.249015	0.000416518	0.00456908	0.985028	-0.000150992	0.998152	non-dropout
CABIN1	8	0	-0.102601	0.156957	0.186578	0.008739	-0.101399	0.615911	-0.526458	5.24024e-15	AF9 specific
SRRM2	7	0	0.146152	0.0739851	0.15657	0.0181141	-0.1146	0.537135	-0.0539269	0.360816	non-dropout
CLCF1	2	0	1.98704	3.99616e-27	1.34489	9.83166e-07	2.57423	1.1842e-13	-1.92764	3.55349e-13	non-dropout
NNT	27	0	0.0751669	0.344327	0.308492	8.82157e-05	0.23487	0.170759	-0.708223	3.29887e-23	non-dropout
MMD	9	0	-0.166617	0.0771608	-0.313063	0.000382667	0.00193579	0.994913	-0.108304	0.25066	non-dropout
ADAT1	8	0	0.275776	0.000733039	-0.297727	0.00225298	0.138472	0.51387	0.156962	0.0511355	non-dropout
RBFOX2	12	0	0.0248096	0.818301	0.343916	2.23423e-05	-0.243797	0.208546	0.14154	0.0425036	non-dropout
FPGS	9	0	0.372079	5.93436e-06	0.202141	0.0217306	0.0231064	0.924615	-0.179739	0.031612	AF4 & AF9
CCNDBP1	9	0	-0.0823584	0.282818	0.268348	0.000638437	0.152346	0.458032	0.347711	4.11575e-06	non-dropout
PDSS1	4	0	-0.23568	0.00729203	-0.337939	0.000164012	-0.061562	0.786841	0.196958	0.00993012	non-leukemia-specific dropout
ORC6	3	0	-0.0401892	0.680436	-0.498903	4.18813e-12	0.0497495	0.837163	0.463156	8.81487e-15	non-leukemia-specific dropout
ORC3	9	0	0.266828	0.000617887	-0.280589	0.00449365	0.195616	0.351602	0.197699	0.0330491	non-dropout
ACOT9	3	0	0.137859	0.391225	0.4621	0.017785	0.28445	0.362248	-0.565283	0.00251514	non-dropout
PATZ1	28	0	-0.00888998	0.924737	0.283226	0.000599682	-0.210587	0.282243	-0.170974	0.0167648	non-dropout
CORO1C	18	0	0.305049	2.19047e-05	-0.465107	1.05888e-13	0.289428	0.0765166	0.0800337	0.191328	non-dropout
ZMYND8	13	0	-0.0952959	0.115665	0.207506	0.000226455	-0.204105	0.224034	-0.771843	1.6523e-32	non-leukemia-specific dropout
TSSK2	1	0	NA	NA	1.07918	0.00840952	NA	NA	NA	NA	non-dropout
RUSC1	19	0	-0.218656	0.0364517	-0.786041	3.83774e-08	-0.174117	0.487154	1.28239	2.96907e-28	non-dropout
NUP62	13	0	-0.159889	0.0290628	-0.201265	0.0211159	-0.361266	0.0261365	-0.407962	2.7633e-10	non-dropout
POLA2	3	0	-0.030194	0.718488	-0.237868	0.00120282	0.017161	0.942595	0.160852	0.033536	non-dropout
SLC7A11	25	0	-0.817064	3.81104e-11	-1.51838	4.30056e-18	0.722124	0.000848601	-1.11342	1.71163e-55	non-dropout
PLA2G15	11	0	0.493625	2.29959e-11	0.348603	0.00117218	0.208987	0.352965	1.14573	2.98635e-45	non-dropout
TMEM2	12	0	-0.208295	0.00664423	0.452472	1.92064e-07	0.160281	0.451848	1.69961	3.0328e-89	non-dropout
SH3BP4	1	0	-0.583496	5.21233e-13	1.23657	1.47254e-47	0.220314	0.311107	-0.990081	1.01997e-19	non-dropout
SGK3	10	0	NA	NA	1.23487	0.00229221	NA	NA	NA	NA	non-dropout
SHPK	2	0	0.0302918	0.790189	0.259793	0.0272511	0.0133419	0.962803	0.38431	7.11351e-05	non-dropout
TMEM245	5	0	-0.177488	0.00800616	0.158852	0.0172756	0.0789427	0.683919	0.457623	1.50008e-15	non-dropout
PITPNB	6	0	-0.0234487	0.785836	-0.25576	0.00130433	0.0888382	0.671551	-0.652804	2.49812e-26	non-leukemia-specific dropout
PISD	1	0	0.179362	0.021376	-0.245646	0.00483074	-0.360166	0.0434967	-0.436483	2.28769e-10	non-dropout
OSBP2	6	0	NA	NA	3.63199	8.22979e-09	NA	NA	NA	NA	non-dropout
MTCH1	13	0	-0.065596	0.434695	-0.206512	0.0108216	-0.449747	0.00956615	-0.0777352	0.276105	non-dropout
ALOX5AP	15	0	0.35459	0.0697246	-1.3906	1.26654e-11	0.0634766	0.883511	-3.07118	4.31825e-45	non-dropout
LAMP5	16	0	-1.42292	5.91961e-122	-0.309687	0.000255159	-0.387259	0.0273509	0.0195213	0.808632	non-dropout
TFIP11	5	0	-0.0987618	0.16208	0.208623	0.0177374	-0.442795	0.00779951	0.171063	0.0307049	non-dropout
PANX1	8	0	0.0691144	0.377787	-0.316874	1.39712e-05	-0.378216	0.0246022	-0.0682377	0.313624	non-dropout
PRPF6	25	0	0.0947397	0.22695	0.205403	0.00827971	-0.0335921	0.884465	0.174367	0.0278001	non-dropout
ZNF318	13	0	0.627512	2.06683e-31	1.6203	1.62289e-136	0.727359	2.96235e-07	-0.487044	2.03406e-13	non-dropout
SPDYA	1	0	NA	NA	1.3589	0.00545367	NA	NA	NA	NA	non-dropout
RNASEH1	3	0	0.051985	0.592572	-0.233956	0.00191835	-0.233137	0.204855	0.128365	0.113698	non-dropout
PELI3	12	0	0.431942	3.49096e-06	0.525476	2.90604e-05	-0.0385845	0.906306	0.482973	0.000293491	non-dropout
MTOR	8	0	0.100729	0.125658	0.535083	3.0422e-19	-0.0741038	0.71575	0.222026	0.000272687	non-leukemia-specific dropout
CENPI	1	0	-0.16982	0.183222	-0.396115	9.43477e-06	0.412979	0.0524935	0.0330407	0.754862	non-dropout
FTH1	19	0	-0.010356	0.915282	0.27785	0.00217543	-0.0642441	0.763216	0.624789	4.64822e-20	non-dropout
FUCA1	7	0	0.613435	5.76163e-10	0.534379	2.31838e-05	0.63481	0.00382798	1.29798	3.45073e-24	non-dropout
FUT4	7	0	-0.606916	2.7423e-31	0.29112	7.57755e-06	-0.202257	0.245496	-0.140005	0.0154155	non-dropout
FUT7	1	0	0.108388	0.471284	-2.12501	2.87237e-59	0.816008	2.45223e-06	-2.56686	4.93109e-101	non-dropout
STXBP4	7	0	0.0610224	0.640003	-0.330105	0.00287171	0.0984096	0.674222	0.337937	0.000673279	non-dropout
KDSR	4	0	-0.00389221	0.971046	-0.32643	2.49047e-05	-0.153013	0.460423	0.770834	7.82137e-30	non-dropout
PRR14L	1	0	-0.180846	0.00198933	-0.152476	0.0166845	0.108293	0.556748	0.338155	2.78141e-07	non-dropout
ZBTB38	2	0	NA	NA	1.65759	9.3697e-07	2.93675	5.89723e-10	NA	NA	non-dropout
ZNF620	2	0	-0.123852	0.322537	-0.283433	0.00551266	-0.0782778	0.74407	-0.124608	0.193127	non-dropout
MMS22L	8	0	-0.12229	0.212054	-0.236672	0.00622946	0.354146	0.0488944	-0.035368	0.628326	non-dropout
CERS6	15	0	-0.0531897	0.522512	-0.231029	0.000533147	-0.0621759	0.764551	0.397731	1.53357e-12	non-dropout
MSRB3	27	0	NA	NA	3.25168	3.0133e-06	NA	NA	NA	NA	non-dropout
ZDHHC20	1	0	0.0602597	0.535731	-0.210729	0.0142749	0.0703244	0.768585	-0.212179	0.00120073	non-dropout
YTHDF3	15	0	-0.107808	0.0749536	-0.217354	0.00104004	-0.0843708	0.661889	-0.132467	0.0171691	NA
RALGAPA1	6	0	0.177591	0.109157	0.23427	0.0313253	0.563962	0.00453093	1.10901	6.46206e-41	non-dropout
UBN2	13	0	-0.0644829	0.465271	0.396634	2.02553e-07	0.245575	0.188557	-0.111257	0.148463	non-dropout
EHBP1L1	4	0	0.321524	0.00124457	0.364744	1.00039e-05	-0.118099	0.572472	-0.841132	1.12516e-34	non-dropout
NIFK-AS1	1	0	-0.205815	0.0403931	-0.225577	0.046134	0.276449	0.225194	-0.421647	0.000968074	NA
SLC37A4	2	0	-0.11299	0.271063	-0.262345	0.0292772	-0.441572	0.0271849	-0.659166	3.68366e-11	NA
CNIH2	2	0	-0.524958	0.108316	0.749012	0.0254014	0.562284	0.333838	NA	NA	non-dropout
ZDHHC24	8	0	-0.1968	0.304814	0.378853	0.0424881	0.0717259	0.864295	0.124017	0.667237	non-dropout
PROSER2	1	0	0.00241285	0.986648	0.222606	0.030763	-0.50406	0.0175253	0.513213	4.6474e-07	non-dropout
ZDHHC23	5	0	0.793035	5.65864e-06	1.16993	8.85372e-09	0.66751	0.0423494	-0.837738	0.00204324	non-dropout
GAB1	3	0	-0.0625183	0.452565	0.567665	1.26857e-12	0.0300402	0.905178	0.362987	6.69032e-09	non-dropout
TMCO4	5	0	0.317156	0.00030104	0.428877	5.98852e-06	0.0909799	0.693405	-0.206314	0.0811591	non-dropout
MCOLN2	3	0	0.562774	3.10998e-15	0.633168	2.51126e-17	1.19562	4.21898e-15	-0.228126	0.0170739	non-dropout
LRRC57	4	0	-0.102765	0.340362	-0.341219	0.000456499	-0.0611509	0.802491	0.0237574	0.789318	non-dropout
TCP11L2	2	0	0.800822	7.78809e-16	1.63419	1.35542e-47	0.792079	0.0105104	-0.372047	0.0398776	non-dropout
ELMOD2	12	0	0.177247	0.061533	-0.352905	0.000117703	0.224275	0.288023	0.261745	0.000393852	non-dropout
GABRA3	2	0	-0.75304	0.0378744	1.0147	0.012551	2.29076	6.41819e-06	0.214098	0.531311	non-dropout
COL24A1	2	0	1.32872	4.64207e-09	-1.71158	1.4796e-06	2.18228	1.58635e-10	0.52047	0.0497525	non-dropout
SDHAP1	10	0	-0.0406149	0.666082	-0.251914	0.00434446	-0.0154325	0.949654	0.525843	4.61201e-14	NA
PAN3	2	0	-0.225541	0.000360137	-0.175467	0.0263042	-0.0419089	0.834687	-0.529297	1.55262e-19	non-dropout
GABRB2	1	0	0.14707	0.415207	-0.559496	0.000804687	0.588394	0.018618	0.210779	0.0678336	non-dropout
STEAP1B	2	0	NA	NA	-1.22342	0.00208087	0.56142	0.247076	-0.650539	0.0646793	non-dropout
NAPSB	11	0	0.470379	0.00392904	-1.85007	0.000184103	2.46091	2.05183e-08	NA	NA	NA
NATD1	1	0	0.458501	0.000250489	0.426133	0.000285946	0.0309583	0.939205	2.05955	6.63759e-39	NA
LMNTD2	3	0	0.178571	0.636359	1.31313	0.00141342	NA	NA	NA	NA	NA
SCML4	1	0	0.817799	1.96119e-17	1.24132	1.17649e-39	0.0441808	0.888047	-0.301156	0.250029	non-dropout
MFSD8	12	0	-0.0206372	0.862946	-0.20296	0.0480618	0.486789	0.0244351	0.38118	1.71815e-05	non-dropout
MAP7D2	1	0	-0.46224	0.0778444	-0.585725	0.00294317	-0.784205	0.0225358	-1.44077	9.87681e-06	non-dropout
GCSAM	1	0	-0.300117	0.212695	2.56073	8.28286e-69	1.62628	4.48997e-08	NA	NA	non-dropout
SNX33	4	0	-0.102191	0.413664	0.680416	1.17019e-05	0.448551	0.144156	-0.287406	0.141824	non-dropout
FAM133B	1	0	-0.213576	0.0443143	-0.312578	0.00372635	-0.0229997	0.936636	0.43354	1.42252e-08	non-dropout
PRPF40B	2	0	0.323381	0.11552	0.702787	0.00209303	0.39853	0.146812	-0.714175	0.00334451	non-dropout
TBC1D22A	3	0	-0.0307424	0.727041	0.265206	0.00959787	-0.0551639	0.800719	0.0658047	0.526843	non-dropout
DSTYK	12	0	0.539862	2.72786e-11	0.689833	9.11805e-15	0.583903	0.00255797	0.0230182	0.833624	non-dropout
RASGRP3	24	0	0.303115	0.0520373	1.8198	2.37943e-37	0.89453	0.0182576	-1.2416	3.14573e-07	non-dropout
RAD54B	7	0	-0.356984	0.0082188	-0.313448	0.00333548	0.339408	0.122827	0.60022	4.10008e-08	non-dropout
SLC39A6	12	0	0.122613	0.132453	-0.216992	0.00786712	-0.168091	0.419497	0.33877	2.31625e-06	non-dropout
SVIP	1	0	0.247154	0.0477556	-0.611286	8.80097e-05	-0.0424293	0.894486	0.34503	0.000196726	non-dropout
LSM4	6	0	0.0580096	0.553981	-0.338583	0.00147483	-0.270605	0.204855	-0.419183	0.000240348	non-leukemia-specific dropout
GALC	6	0	0.240385	0.00352496	-0.255081	0.0041354	0.232302	0.303276	-1.2398	1.73837e-34	non-dropout
TNFAIP8	7	0	-0.278055	0.000238028	-0.513114	3.22902e-10	0.284361	0.179751	-0.149094	0.0875692	non-dropout
ARIH1	24	0	0.0950431	0.138749	-0.184672	0.0181836	0.116023	0.535018	0.699473	7.26814e-35	non-dropout
TMEM184B	9	0	-0.424966	1.01164e-11	0.33904	0.000127814	-0.430559	0.0173937	0.751087	1.04489e-17	non-dropout
NBPF14	7	0	-0.349222	0.116827	1.36819	8.61736e-10	1.16234	0.000117313	0.428218	0.0172031	NA
ABTB2	8	0	0.836043	6.10152e-08	0.579763	0.0157962	1.73927	1.20653e-08	1.25618	1.77514e-07	non-dropout
ASF1A	1	0	-0.189557	0.0276431	-0.276861	0.00244345	-0.603247	0.00104273	0.822109	3.02287e-33	non-dropout
ZNF345	2	0	0.12398	0.300879	-0.310037	0.0106499	0.432082	0.113991	0.472646	3.21073e-06	non-dropout
TECPR1	8	0	-0.0411741	0.694025	0.313701	0.00263388	-0.106244	0.643999	-0.52808	3.46015e-07	non-dropout
ABHD14A	8	0	-0.497751	0.0907169	0.791979	0.0120275	-0.812718	0.0695698	-0.0845957	0.812592	non-dropout
PRKD2	8	0	0.028385	0.795723	-0.248788	0.0016842	-0.227134	0.185873	-1.53081	3.49953e-122	non-dropout
GALNS	12	0	0.282979	0.00885559	0.461934	4.22912e-05	-0.0366625	0.900486	0.019525	0.880152	non-dropout
ZNF473	8	0	-0.205992	0.00122863	-0.214638	0.0163333	-0.234831	0.205531	-0.0676747	0.351304	non-dropout
GALNT1	4	0	0.0224773	0.825295	-0.196569	0.013502	0.35029	0.0475675	0.363053	2.27881e-05	non-dropout
INTS7	15	0	-0.0891431	0.276383	-0.333233	0.000159885	0.0617915	0.773207	0.197724	0.00186853	non-leukemia-specific dropout
RCHY1	19	0	0.0330831	0.761311	-0.255162	0.00892266	0.273546	0.184748	-0.777374	6.45394e-24	non-dropout
IFFO1	3	0	-0.130336	0.131561	0.382592	0.000275656	-0.134736	0.546632	1.6704	4.71047e-52	non-dropout
AHCTF1	9	0	-0.149375	0.0279959	-0.280964	1.76036e-05	0.119694	0.549097	0.465708	1.50214e-17	non-dropout
GALNT3	8	0	-0.131292	0.304073	-0.418606	8.72705e-05	0.354435	0.0930844	-0.930791	3.16798e-23	non-dropout
RTTN	10	0	-0.0403911	0.595699	-0.277666	9.55769e-05	0.094224	0.631671	0.0719654	0.312291	non-dropout
NDUFAF3	26	0	0.279566	0.00154656	0.291317	0.00152066	-0.546836	0.00518566	-0.63011	7.21544e-12	non-leukemia-specific dropout
ALS2CL	2	0	0.291371	0.0536777	-0.649907	0.0127671	-0.358268	0.241489	-2.61647	2.55387e-26	non-dropout
GALT	25	0	-0.17963	0.0344423	0.376744	0.000315864	-0.420217	0.0411501	1.26244	1.77982e-50	non-dropout
ATL3	22	0	-0.156697	0.0695071	-0.372228	6.96519e-08	0.0827719	0.705549	-0.534629	6.10462e-13	non-dropout
SGMS1	14	0	-0.491931	3.05463e-09	0.653043	2.65916e-16	-0.343145	0.0778185	0.439561	2.96217e-09	non-dropout
MYRIP	1	0	0.38879	1.33615e-05	1.0389	1.49666e-35	0.530892	0.00873429	0.454594	7.94765e-06	non-dropout
ZNF521	36	0	1.12634	7.15618e-10	4.81818	0	3.34559	1.44518e-42	-0.161665	0.57457	non-dropout
ASPM	2	0	-0.522868	1.07018e-14	-0.239147	0.00311368	0.206166	0.292238	0.277298	2.18863e-07	non-dropout
GEMIN5	4	0	-0.0986827	0.184141	-0.34022	1.50066e-05	-0.319253	0.0674676	0.159911	0.0279904	non-dropout
GAMT	4	0	-0.354334	0.00469885	0.425865	0.00344011	-0.612127	0.00881717	0.252785	0.0680158	non-dropout
CLIC4	1	0	-0.291326	3.91505e-05	-0.383976	1.27505e-08	-0.225281	0.179667	-0.400896	1.07847e-10	non-dropout
NIPSNAP3A	6	0	-0.170412	0.168653	-0.241049	0.0345478	0.26928	0.267919	-0.118281	0.354293	non-dropout
WWTR1	1	0	-1.1311	0.000652817	1.77754	0.00156507	NA	NA	NA	NA	non-dropout
SAMHD1	14	0	0.576483	6.25357e-13	0.26275	0.0142213	1.36713	1.54968e-16	-0.573124	1.19935e-11	non-dropout
C20orf194	1	0	0.218807	0.000728227	0.307595	5.19739e-06	0.175137	0.364645	0.333741	3.24366e-06	non-dropout
ZNF385A	27	0	0.140655	0.43492	-0.602007	0.000877246	0.707101	0.0184307	-1.31427	3.4231e-12	non-dropout
SEC31B	3	0	0.158858	0.0783646	0.368388	0.00169498	0.22762	0.289723	0.0502378	0.669107	non-dropout
KANK2	1	0	0.323586	0.000572428	0.955256	6.45744e-37	0.61357	0.00174769	-0.11718	0.210868	non-dropout
SH2B1	23	0	-0.418654	1.35739e-07	-0.178907	0.0185254	-0.547177	0.00129952	-0.614432	2.40416e-19	non-dropout
TIPARP	8	0	-0.455486	2.93129e-12	-0.264359	0.000768343	0.0527327	0.811991	1.35	6.88677e-128	non-dropout
CHMP2B	13	0	0.170247	0.154038	-0.249005	0.0453115	0.0119113	0.967707	0.572334	7.24495e-13	non-dropout
DNAH1	2	0	0.169409	0.0212642	0.362984	2.91762e-05	0.127584	0.528573	0.059916	0.545687	non-dropout
GORASP2	4	0	-0.0210522	0.817275	-0.181584	0.030005	-0.343346	0.0334933	0.213124	0.000283938	non-dropout
TKFC	10	0	0.151698	0.23368	0.410419	0.00302217	0.294809	0.254444	-0.182545	0.328698	NA
SPATS2L	14	0	-0.284581	0.00698439	1.18917	1.21687e-49	0.274018	0.165506	0.0746138	0.393263	non-dropout
TENM4	1	0	0.816019	3.03831e-32	2.70927	9.76525e-275	0.950216	1.25903e-09	0.338568	0.000331953	non-dropout
L3MBTL1	1	0	0.207884	0.0249322	0.266956	0.0140252	0.2115	0.343817	0.0890066	0.505221	non-dropout
LRIG1	12	0	-0.233928	0.00184331	1.27557	3.04104e-88	-0.338849	0.0601487	-0.107867	0.428556	non-dropout
UPF2	24	0	-0.0543592	0.471368	0.175051	0.0462191	0.324694	0.0803069	-0.364814	1.29115e-08	non-leukemia-specific dropout
LRP10	11	0	0.178064	0.0367109	0.327734	3.61573e-05	0.260851	0.143024	-1.15875	3.71087e-65	non-dropout
PCDHGA12	7	0	0.0862907	0.358988	-0.265826	0.0349806	0.168327	0.444168	-1.44474	2.02853e-35	non-dropout
NSUN5P2	3	0	0.0303713	0.80215	-0.427182	1.28909e-05	-0.332101	0.10862	0.0728633	0.468065	NA
PLEKHG3	1	0	0.875347	2.34497e-16	-1.35414	6.72302e-62	0.667108	2.23336e-05	-2.75029	0	non-dropout
OSBPL3	10	0	-0.205593	0.0675847	0.379185	0.00104702	-0.0996844	0.697228	0.334864	0.00125334	non-dropout
IPCEF1	11	0	-0.342913	0.00188574	0.772612	1.67413e-19	1.16859	3.4015e-10	0.320439	4.72147e-05	non-dropout
ZNF451	3	0	-0.109254	0.133093	-0.167799	0.0271126	0.0281372	0.90504	0.336285	2.57443e-10	non-dropout
SIPA1L1	2	0	0.15923	0.0314303	0.528037	8.31397e-15	0.221508	0.224987	0.192837	0.00579143	non-dropout
SETBP1	10	0	-0.154787	0.0883265	2.00846	1.30644e-92	1.80113	1.00024e-24	0.368346	0.00499753	non-dropout
CNTNAP2	1	0	NA	NA	3.81005	2.53622e-07	NA	NA	NA	NA	non-dropout
FAM169A	3	0	-0.0533238	0.811069	0.598367	0.00106055	0.388888	0.248582	-1.58396	6.9802e-10	non-dropout
DNM3	3	0	-0.262974	0.1627	-0.412108	0.00957889	0.836014	0.00630372	0.348645	0.0355614	non-dropout
AUTS2	1	0	-0.0805237	0.201182	-0.243411	0.00014997	-0.202185	0.236578	-0.205655	0.000782872	non-dropout
RAB11FIP5	2	0	-0.110598	0.684643	0.920895	2.48906e-05	0.488033	0.229287	-1.42489	5.04176e-08	non-dropout
APPL1	13	0	-0.0577471	0.558562	-0.206889	0.0364667	0.216816	0.302802	-0.0762693	0.348152	non-dropout
ARHGEF26	3	0	-0.476585	0.000735246	-0.568528	0.000380387	0.496526	0.0300877	0.469841	2.44983e-05	non-dropout
GGA1	10	0	0.324196	3.2846e-05	0.328503	0.000144657	0.23146	0.248582	-0.522421	2.03098e-10	non-dropout
TOR1AIP1	11	0	0.0600542	0.523317	-0.198447	0.0367436	-0.113266	0.615452	0.106918	0.127377	non-dropout
PYGO1	2	0	-0.116974	0.521152	0.471701	0.000169018	1.38241	7.81741e-12	-0.978447	3.33161e-14	non-dropout
CCDC69	6	0	0.154684	0.0100408	-0.227647	0.0132038	0.462951	0.00807337	-0.614183	1.19888e-15	non-dropout
TCTN3	4	0	0.0859467	0.430448	-0.404811	0.000164952	-0.0133966	0.96239	0.30685	0.00104151	non-dropout
FGFR1OP2	10	0	-0.0291156	0.82007	-0.496878	1.74027e-08	-0.0614369	0.805771	0.897923	2.56823e-40	AF9 specific
SERBP1	16	0	-0.167036	0.00348719	-0.141345	0.042776	-0.0938298	0.613793	-0.0189882	0.75868	non-dropout
ZBTB20	36	0	0.206426	0.00113133	0.315973	0.000821982	0.593773	0.00216315	0.309487	9.12104e-07	non-dropout
TTLL3	2	0	0.232336	0.056515	0.439765	0.000735509	0.102046	0.710883	-0.217992	0.0840404	non-dropout
TRAF3IP1	8	0	0.110237	0.504526	0.668669	1.39589e-05	-0.0133776	0.973732	-0.487884	0.00313794	non-dropout
PHF19	13	0	0.161868	0.00838153	0.214573	0.00160986	0.319605	0.0694214	-2.36006	2.29307e-249	non-dropout
GARS	5	0	-0.339349	1.91439e-07	-0.64474	2.42196e-21	0.0781744	0.703668	0.117667	0.0775977	non-dropout
GART	8	0	-0.0908848	0.173174	-0.182696	0.00626893	-0.0811449	0.674598	-0.490835	2.90231e-17	non-leukemia-specific dropout
GAS1	1	0	-0.867535	4.54206e-44	0.51874	7.76001e-08	0.652007	2.74208e-05	-0.58166	8.03688e-14	non-dropout
PTPN22	14	0	1.51361	1.05244e-39	-0.429871	0.00286	1.48156	8.67686e-12	-1.93532	5.15015e-65	non-dropout
AMD1	24	0	-0.186547	0.00166603	-0.184158	0.0207058	-0.270316	0.109437	0.625262	2.37432e-31	non-dropout
SPAG8	4	0	0.830701	0.000165109	0.937008	0.000574373	0.6019	0.152584	-0.205525	0.580399	non-dropout
PITPNC1	5	0	0.0336633	0.677083	0.57051	1.84472e-20	-0.13544	0.453401	0.314316	4.27662e-06	non-dropout
GAS8	1	0	0.125134	0.328017	0.427077	0.00615408	-0.243223	0.3225	-0.458292	0.0047183	non-dropout
FBXL3	7	0	-0.163452	0.035872	-0.194999	0.0347673	-0.0520687	0.833499	0.128973	0.0847733	non-dropout
ARL5A	5	0	0.0426322	0.646019	-0.255747	0.00786712	0.108033	0.618991	-0.371666	5.61517e-07	non-dropout
PHGDH	14	0	-0.577255	6.39935e-22	-0.886702	4.96296e-25	-0.0316586	0.88359	0.242355	0.000289287	non-dropout
STAP1	1	0	0.894617	0.00415946	1.74518	1.37795e-08	2.45214	3.19307e-06	NA	NA	non-dropout
TIAM2	1	0	0.0947625	0.355548	2.82406	8.78581e-269	0.733873	0.000851363	-0.23313	0.171949	non-dropout
FBXL5	20	0	-0.233028	0.00416097	0.234511	0.000994188	0.226392	0.212998	0.143947	0.0649219	non-dropout
CABYR	3	0	0.1377	0.613748	0.844787	0.0200928	0.951301	0.0275172	2.00253	1.42785e-11	non-dropout
FBXW8	2	0	-0.0775577	0.458269	0.269032	0.0040683	0.047855	0.847296	0.215536	0.0115752	non-dropout
FBXO25	1	0	0.241801	0.00591343	0.434161	1.60363e-05	0.22183	0.324662	-1.45327	9.56264e-48	non-dropout
FBXO22	3	0	0.0300032	0.756092	-0.385345	0.0005032	0.256711	0.194688	0.0652242	0.388344	non-dropout
[truncated: 3,156 more rows]

## Sheet: RUNX1 GRN edges
	Geneid.from	Geneid.to
	EGR1	ADA
	RUNX1	ADA
[truncated: 38,087 more rows]
