# Supplementary material for: A KMT2A-AFF1 gene regulatory network highlights the role of core transcription factors and reveals the regulatory logic of key downstream target genes
Source: Genome Res. 2021 Jul;31(7):1159–73. doi: 10.1101/gr.268490.120 (PMC8256865; doi:10.1101/gr.268490.120)
Supplement: Supplemental Material [file supp_gr.268490.120_Supplemental_Data_S2.xlsx]

## Sheet: Legend
Supplemental Data S2. Patient sub-network node clusters.
Genes grouped by k-means clustering of the patient GRN UMAP. Data underlying UMAP are the binary presence/absence of nodes across individual patient GRNS, as in Figure 2.

## Sheet: Supplementary Data 2
	UMAP clusters of nodes based on binary node expression across ALL, AML and FBM patient sub-networks
	Cluster 1		Cluster 2		Cluster 3		Cluster 4		Cluster 5
	ELF1		KMT2A		PAX5		MAZ		E2F5
	RUNX1		MYC		DHRS3		CLOCK		TEF
	LMO2		NFYA		EGR3		LEF1		MIR21
	EGR1		ARNT		PTCH1		IKZF2		IRX5
	MEF2C		GTF2I		CAMTA1		RUNX2		MIR548Z
	IKZF1		STAT1		SDC2		HOXA9		MIR16-2
	ATF4		ZNF143		ELMSAN1		BACH2		MIR101-1
	FOXP1		RREB1		CREBRF		ZHX3		MIR200C
	FOXO3		UHRF1		THUMPD3-AS1		MEIS1		DTNA
	RBPJ		MEF2A		THSD7A		TSHZ1		SMAD6
	HBP1		REL		WAPL		SGK1		MIR636
	HMGB2		PTTG1		JADE2		MXD4		ZNF521
	FLI1		FOSL2		ZBTB21		BCL6		MYO1E
	MYB		IRF2		GSE1		DAB2		HOMER1
	YY1		IRF1		HNRNPDL		NR4A1		ISL2
	DYRK1A		NR3C1		LAMP5		NFIX		CSF1
	JUN		ARID5B		FZD2		DGKZ		ADGRL1
	ZFAND6		NFIL3		MPC2		CEBPA		PALLD
	ANKRD28		GTF2A1		FAM214B		ZBTB20		HMX3
	MALAT1		NCOR1		EFNB1		FAM78A		MAP3K7CL
	ETV6		ZEB2		HIST1H1B		PRDM1		BEND4
	JMJD1C		GABPB1		ABHD17B		SLC1A3		PKDCC
	MARCKS		ARID1B		POLR3K		SNTB1		EPAS1
	CREB1		SPRY2		MSMO1		WT1		NT5E
	JUND		NFE2L1		AIDA		LZTS2		TMEM45A
	SSBP2		PATZ1		KAT6A		HIVEP2		GPAT3
	HMGN2		TNRC6B		HMGA2		SLC6A6		FERMT2
	SPTBN1		CXXC5		FMNL2		GLYR1		IRX3
	CTCF		CTDSP1		SLAIN1		HLX		TNFSF14
	NFKB1		ADNP		WDR81		PDE1B		FOXP2
	GNAS		LRRC8D		CCDC50		ZNF76		ENAH
	ARF6		RPS6KA3		FAM219A		MAML2		LONRF3
	BTG1		NR2C2		N4BP3		ZC3H12C		FBXO32
	CBFB		ETS2		CEP85L		DNM2		SPRED1
	DPYSL2		CDKN2C		SFMBT1		HMOX1		ADGRL2
	ZBTB1		ZNF367		OSER1		CPEB2		PC
	SRGN		PHLPP1		LRRC1		TBC1D4		BHLHE41
	WDR26		UBASH3B		VPS50		JAG1		FILIP1L
	KLF6		ELK3		ZNF703		FGR		FAM84B
	TSC22D3		ZNF281		CAMK2D		FN1		PHLDB1
	HNRNPF		PDE7A		AP5B1		ZC3H12D		RAI14
	PTPRC		KLHL24		TUBB4B		NAB2		KIAA0825
	YWHAZ		SMC4		CHP1		ZNF219		MAF
	DYNLL1		ADAM10		NR2F6		POU2F2		CHPF
	MAPK1IP1L		GFI1		ETV3		BMP2K		PARD6B
	H2AFV		ATF7IP		PAFAH1B3		PTPN9		ACVR2B
	ELMO1		KDM3A		DESI2		TFE3		TRIP10
	HIPK3		PLEKHA2		MSRB1		TLE3		RASAL2
	EZH2		RASSF5		ZC4H2		MBD6		PAX6
	MTF2		SREBF2		RGS1		FASN		CMYA5
	SUZ12		OTUD1		HIST1H3H		WDTC1		CAMSAP2
	MKRN1		CHSY1		HIST1H2BJ		SIPA1L3		SLC7A11
	NDUFAF3		ATRX		TBC1D31		LATS2		SPATS2L
	AMD1		VEZT		CLHC1		ITGAL		MAGI3
	HSPD1		MAP2K1		KANSL1L		SMAD3		PDE7B
	CELF2		PER2		TIMM8A		ZBTB7B		OTX1
	HSP90AA1		CELF1		LRIG1		PPARD		PSMC1
	AFF3		KDM2A		BABAM1		SLC38A7		ARHGAP20
	MBNL1		MED13L		SOWAHD		BMPR2		ROBO1
	ERI3		PHIP		MMP14		SPINT1		GPR137B
	CD164		MEPCE		THAP1		TPM2		NRP1
	CAP1		CALCOCO1		GPATCH2L		ZDHHC14		HOMER2
	TMED10		EXOC4		CXorf56		PRR5L		SEMA3A
	EEF1A1		SLC3A2		HIST1H4C		PKP4		RASSF8
	EEF1B2		TNFAIP3		MIEN1		MIDN		AGAP1
	UBXN4		WEE1		YBX3		TMEM170B		CNKSR3
	CXCR4		ARHGAP12		HIST1H3F		TOM1		DLX3
	TSC22D2		TP53INP1		EBF1		AGPAT2		SDK1
	SH2B3		PLXNC1		MIR589		NLRP3		GPC1
	ANP32B		NCOA7		TMPO-AS1		MLLT6		MYCL
	RNPS1		ZNF800		CLP1		PCDHGC3		PTPRG
	OAZ1		APLP2		CKS1B		PURA		FZD1
	PPP2R5C		MEF2D		GALM		ATXN2		GTF2IRD1
	SFPQ		NR4A2		FAM43A		FAM129B		PRICKLE1
	ZBTB10		TMEM57		HACD2		SLC30A1		C6orf223
	FOXN3		REV3L		ZSWIM8		ALPK1		MRAS
	DUSP6		ATPAF2		PIGW		RAB11FIP1		ADGRD1
	EIF4A2		QKI		HIST1H1C		PRAM1		TRHDE
	FLT3		POU2F1		ID1		HPS3		KIFC3
	CORO1C		INTS6		LINC-PINT		BHLHE40		ME1
	H2AFZ		TRMT2A		HIST2H2BF		TRIM14		PLOD2
	PHF20		HPCAL1		KLHL11		GPHN		BMP8B
	CDKN2AIP		ATP1A1		AP5M1		NFAT5		BMPR1A
	ZFP36L2		RANGAP1		LRIF1		CSF1R		WLS
	TCP1		BRD2		APOBR		SLC39A11		PRSS12
	BUB3		SRPK1		ERO1B		CPEB3		DOCK4
	MTDH		ZFX		RGS16		WDFY3		EDIL3
	ZNF274		FBXL20		VLDLR		MLC1		UST
	TUBB		TCF12		HIST1H3C		SEL1L3		BVES
	EVI2B		CDKN2D		HIST1H3I		ARHGEF12		DLX1
	2006-09-01		DPAGT1		TMEM60		PLD3		AK4
	SNX5		ARID2		DDIT4L		SH2B1		PPM1E
	IGFBP7		RHOBTB3		UBALD1		DSE		TBC1D30
	2002-09-01		ZC3H4		METTL23		HK1		AMH
	HECA		SIN3A		PPP1R21		HOXA10		SLC26A11
	PSMA3		SH3KBP1		C15orf61		NEDD9		GRM1
	RAD21		MXI1		ILF3-AS1		PHF1		RTN4RL2
	SLC39A8		ATF3		XIRP1		PLAGL1		ITGA2
	SRSF2		NRAS		PPP1R18		SPPL2B		CTXN1
	SLC20A1		EVL		ECM1		ZNF398		ASIC1
	BNIP3L		EGLN1		AGO4		ATXN1		OPHN1
	SS18		TET2		RDM1		AEN		ZNF771
	TACC1		ARHGAP15		SMIM14		SOX12		ABCB1
	TGFBR2		ZNF395		CYB561A3		THRA		ABCB4
	TOP2B		PSEN1		RRAS2		FADS2		UACA
	OGT		CAMK1D		R3HCC1L		IL27RA		CTTNBP2NL
	RNMT		UCK2		UBE2S		KLF9		CASKIN2
	ITGB1BP1		RUFY1		GNA11		HDAC5		BMP4
	NPEPPS		YARS		GATC		HYOU1		TWIST1
	H2AFY		IRS2		HIST1H1D		CDC42EP3		METTL12
	CD63		PLAA		LAMTOR4		CLCN6		PLEKHH3
	HERPUD1		LPXN		SMAD7		SLC31A2		BICC1
	CNBP		TGIF1		PCDH9		ITPRIPL2		PPP1R14C
	NAMPT		CDK6		VSIG10		EXTL3		USP2
	TRIB1		ADRM1		DUSP23		MAPKBP1		ADAMTS1
	PSIP1		RASSF1		C9orf40		CYFIP1		ARHGEF10
	UHRF2		CRKL		BRF2		DNAJC16		NUAK1
	MAPK14		DLG1		SMG9		FBXO46		ZNF653
	STT3B		ACSL3		SDHAF3		MYOF		ADD2
	SIRT1		AAK1		TIGAR		SUMF1		NEURL2
	FTL		MON2		FAM217B		IL1RN		NANP
	GLA		C16orf72		CARF		LIMK1		NQO1
	ATAD2		ITPR1		HIST1H2AL		MTHFR		CTTN
	DNAJA1		LGALS3BP		UQCC2		NOTCH2		EPB41L1
	LCP1		LMNB1		PSRC1		RIN2		EPHB3
	MCL1		MAP3K5		SEMA7A		PCDHGA10		EPS8
	P2RX1		UCKL1		NEMF		MCOLN1		ITGA11
	SLC38A2		PSMD3		FCMR		TP53INP2		FMOD
	PRKAR1A		PSMD11		MAD2L1BP		FBXL17		ANK2
	PELI2		TTC7A		CNIH1		SH3BP5L		IGSF3
	ARRDC3		PTBP1		B4GAT1		SLC7A7		MVK
	MIER1		SIPA1		KAT7		CCPG1		PCSK6
	RAB6A		SKP2		HIST4H4		TMEM63A		MYEF2
	TPP2		NFATC3		EGR2		KIAA0586		TNFRSF12A
	UBC		ZNF148		AMN1		MRC2		TM6SF1
	BTG2		TOB2		VWA8		RBM19		GPR84
	DEK		PIM2		TMEM245		CEBPB		TREM2
	FXR1		SYNRG		BOD1L1		AP1S1		PTPRK
	CGGBP1		CYLD		AGO2		CSNK1D		NXN
	SNAP23		TMEM64		CERS2		SPRED2		SHB
	CD83		ECT2		SNAI3		ERN1		THBS4
	WTAP		C2orf69		ID3		DLGAP4		TIAM1
	IER2		CPNE2		CXCL8		DAAM1		CA11
	ARL6IP5		ZNF292		C19orf68		RHOBTB2		ZNF200
	CCT7		HSPBP1		MEX3D		MGRN1		SLC25A23
	MAPRE2		LRMP		MTERF3		CBX6		PGBD5
	PMF1		AFF1		SUCO		ALOX5		VASH2
	TPP1		MEX3C		GFOD1		SAMHD1		SPSB1
	SERBP1		FAR2		ZNF416		LDLRAP1		GPR63
	GHITM		2011-09-01		CBX8		TAF5L		C1orf198
	DNAJB1		PSMC4		PTK2		GCLC		POMGNT2
	LDHA		HLTF		SRGAP2B		GCLM		SOX13
	PFN1		UNG		MIR616		GSK3A		NOS1AP
	PIP4K2A		ADIPOR2		TLE1		NME7		ATP9A
	PPP1CC		C12orf49		LDLRAD4		CD82		UNC13B
	UBR7		CDK13		ABHD16A		PML		STON1
	ARL8B		SCARB2		BORA		C19orf66		MID2
	ZC3HAV1		MLEC		HIST1H2BC		FRMD4A		FCRLB
	PSMB3		ABL1		HIST1H3A		PCDHGA11		TMEM86A
	RAP2C		CWC27		HIST1H4H		NIPAL3		FAM81A
	ENOPH1		HMG20A		MIR22HG		RARA		SAMD11
	RSU1		HEXIM1		HIST1H2AH		RASAL3		PPM1L
	ELOVL1		BLCAP		HIST1H2AG		KIAA0895L		DLG3
	TIMP1		ALDOA		ALKBH8		TLN1		LPAR1
	FAM192A		MPRIP		SUSD6		TNFRSF1B		SLC16A13
	HIST1H2AC		RPRD2		ZNF256		TRAF1		SLC16A9
	USMG5		LEMD3		DUSP14		ASPSCR1		FER
	ADO		NUP62		GPRIN1		TTYH3		PPP1R13B
	PPP1R15B		NARF		CHCHD1		SBF2		BAMBI
	TMEM11		SLC25A24		C19orf70		SESN2		ADGRA2
	ATP6V0E1		AGFG1		MOB3A		CASP9		MOCS3
	USP14		FOXN2		CSPG4		PLXDC2		TREML1
	LATS1		LASP1		SUSD3		SOCS3		ITGB5
	LPAR6		PLEKHO1		HYLS1		CLDN12		KDR
	PAICS		PHKB		ADCY10P1		NUMBL		LAMA3
	OSBPL9		PIK3C3		CNEP1R1		ARHGAP18		SLC25A53
	MAP3K8		PIK3CG		NOCT		TJP2		MIR146A
	CD55		UBL3		DPCD		MICAL2		MYO1B
	DR1		FAM46C		SZRD1		KIAA0355		MSX1
	PSME4		STIM2		NUFIP1		URB2		NPAS2
	PDS5A		SH3RF1		CNPPD1		IRF8		ALDH7A1
	FBXW11		PTPRE		TUBG2		ARID5A		GPR85
	RBMX		SIAH1		GLUD2		BAZ2A		STOX2
	NEAT1		ST3GAL1		STK32C		LYST		PLEKHH1
	GPX1		SOS1		YIPF6		CD300A		RNF150
	DONSON		FMNL1		PSAT1		ZNF526		SORCS2
	HHEX		AKAP1		HIST1H2BD		ZNF641		BEGAIN
	HK2		CDCA3		IFIT3		CCR1		HCN3
	IRF2BP2		PIP4K2B		SERINC2		TMTC2		PTPN14
	JUNB		LRRC8C		IRAK2		ELK1		RAPH1
	MAN1A1		HSH2D		C5orf34		AKT2		SLC7A2
	MCM3		SSH2		FAM212A		KIF21B		STXBP1
	UBXN1		ACTN1		ANXA2R		FOXM1		TPBG
	RAB8B		AMMECR1		MXRA7		CIC		LINC00977
	PPP2R5A		NFATC2		NFKBIL1		ATP13A2		MOB3B
	PPP3CA		NET1		NINJ2		ZFYVE26		DNAJC22
	C5orf15		KDM5B		LIPT1		SH3BP1		PDGFD
	DIP2B		HBS1L		DPM3		PLA2G15		ZNRF3
	CCNB1IP1		TAGAP		C11orf71		TMEM2		HOPX
	RBM3		CLTC		SPDL1		DSTYK		CGNL1
	GAS5		LIX1L		GID8		TMEM184B		NRP2
	S100A4		UBE2F		BLOC1S4		SGMS1		TBX18
	S100A11		CSNK1G3		CHST7		GNL1		TGM5
	GOLPH3		KIF18B		PANX2		HIP1		NRXN3
	SMARCE1		CSTF1		BLK		ANKDD1A		GPC6
	USP1		CEP120		SDHAF1		IL12RB1		TSPAN5
	LAPTM5		DYNC1LI2		STX1A		ITGB7		TACC2
	PABPC4		TAPT1		GID4		ITPK1		CD226
	ANKRD13A		SPEN		SPATA5L1		KCNA3		PPP1R13L
	ZMYM3		DENND5A		METTL16		MGAT2		ADAMTS6
	CNOT8		ESYT1		NR4A3		MIF		CLCN4
	EIF4E2		LARP1		KAZALD1		MINK1		CFAP70
	FNIP1		DICER1		HIST1H2AI		ARHGEF3		RN7SK
	SPCS2		WBP2		APH1B		VILL		SLC2A14
	PSMD14		RUSC1		HIST1H3B		PPME1		SLC38A6
	RRAGB		IFI6		HIST1H4E		PECAM1		C14orf37
	CIB1		GALT		UTP23		ATP7A		DAB2IP
	RAB10		SENP6		THOC3		NLE1		BTNL9
	CMTM7		PHF19		NKD2		PNPO		TTC39B
	ADD3		GBA		NAT1		TRIM62		SLC35G1
	ARL6IP6		GYPC		SEC11C		RNF121		MDGA2
	CNST		HSPA4		CERS5		PRKCH		DPYSL3
	EWSR1		ARRB2		ZFYVE9		WWC3		EFNB2
	RFTN1		PIM3		CEP41		SLC45A4		EPHA7
	ARL6IP1		MSH2		CD70		PTGS1		ERBB2
	PPP1R15A		PPIL1		RIMS3		ARHGAP31		FBLN1
	CACYBP		SLC35A5		AREL1		ARHGAP21		TMEM136
	SERP1		LARP1B		AP5Z1		CXCL16		ZNF485
	GNAQ		MSL2		HS3ST3B1		BCL3		TBC1D32
	COMMD9		PPP2R5D		CDKN2A		RPS6KA2		KIAA1324L
	SLC25A5		BTBD7		CPQ		RRAS		ABCB9
	REPIN1		CCDC47		IGF2BP3		BCORL1		RASD2
	UBQLN1		MID1IP1		PLK2		SCD		PELI3
	HSPA8		RRAGD		ARPP21		MYO1G		HCG27
	IARS		RBL1		RAB40B		SLA		TENM4
	ID2		BCL2		C10orf10		TESK1		GAS1
	KIF5B		SMAP2		SPATA2L		YES1		GRID1
	LAMP2		SORL1		INO80C		RNF219		HOXA1
	NARS		SQLE		ZNF684		ORAI2		APBA1
	SCCPDH		STK10		SLX4IP		CPEB4		HTR7
	PFDN5		MLX		TANGO2		LBH		IL9R
	BCL11A		WIPF1		SPC24		UNC93B1		IRS1
	PMAIP1		CAST		CTGF		FLYWCH1		ITGB8
	FXYD5		FAM126A		AMOT		GPT2		LRRC37A3
	PARP14		BAZ1B		UGT3A2		KCNAB2		KCNG1
	PPP1R2		SLC9A3R1		MICU2		CCNK		KHK
	EAF2		MAP4K4		PPP1R35		PSTPIP1		LTBP2
	PSMA6		TBPL1		GPC2		CD68		MIR196B
	SERINC1		HS2ST1		TRIM32		GNPDA1		MYBPH
	LSM2		CKAP5		ALDOC		GABARAP		NFATC4
	FAM60A		FCHSD2		ZNF423		BTBD9		ATL1
	RAD23B		ZBTB5		SLC35D1		PPM1M		UBE2D4
	RPL29		USP3		BOP1		SIRPA		PEX12
	RPL32		PIAS2		TMEM251		XRRA1		MAP10
	YWHAE		SAE1		BLOC1S6		ZNF433		ELOVL2
	ZNF131		CALCOCO2		RPUSD2		ARID3A		ZSCAN32
	CSDE1		AGPAT1		BBC3		GPR183		SOBP
	SLC25A20		SMC2		DIMT1		SLC37A2		FGGY
	MLF2		B3GNT2		GLDC		KIAA0556		MAPK10
	HIST2H2BE		ERLIN2		GP9		SLC9A8		KIAA1217
	HIST1H2BK		CHEK2		GAS2L3		CBX7		JPH1
	UBA3		GLCCI1		CDIP1		IL17RA		ADAMTS9
	N4BP2L1		STK38		HIST1H1E		CNNM3		SLC17A7
	TXNL1		CIRBP		CCDC85C		HIPK2		TENM2
	ARHGEF6		CTBP1		APBB2		GPSM2		STRIP2
	SCAMP3		VKORC1L1		HSPA1B		HEXA		CARNS1
	TUBA1B		DNMT3B		COA6		ACACA		LRRN1
	CEBPG		DUSP7		PINLYP		INCENP		PTPRR
	MGEA5		RSBN1L		LAMC1		TBC1D10C		PLEKHA1
	CPT1A		FEN1		IL21R		LFNG		SCN5A
	SPIN4		PDXDC1		ATRAID		LRCH4		ZBED8
	DUT		TBC1D1		LSM8		ASPH		ANKEF1
	USP12		ZCCHC11		POLR2I		NPC1		SGCB
	CNOT1		SMCHD1		CCSER2		F11R		SOX5
	RRP1B		VPS8		TRMT10C		ERGIC2		SPAG1
	FOS		KIAA0368		DNAJC17		ZNF589		TEAD3
	BCL2L13		ORC3		KIAA1551		TUBA8		C2
	ANAPC13		FUT8		BBS7		TPCN1		MPPED2
	ATP2C1		FYN		PIDD1		PGPEP1		ZNF79
	BLOC1S2		PTPN22		FAM214A		CASZ1		IGFLR1
	MRPL18		AFF4		WDR45B		KIF26B		CEBPA-AS1
	MYLIP		TNFRSF21		KCNK12		SAMD4B		ULBP2
	GTF3A		HTRA2		SMCO4		LMBR1L		KHDC1
	ASAH1		GNG7		AVEN		RALGAPA2		HIST1H2AM
	PCMT1		RASSF3		KIAA1143		ATP10A		TLN2
	RSL24D1		HMGCS1		ABHD17C		PPM1H		C15orf41
	TMEM69		SPOPL		BCL9		HEG1		SNORD14C
	CHMP5		LCP2		RBSN		DENND1A		STC2
	ZCCHC17		MCM2		MRPL36		PTPRJ		DPH6
	YPEL5		RAB8A		ZFP69B		MAPK12		EFCAB11
	ATP5G3		MTHFD1		SPIB		VPS33A		RHBDL1
	PIN1		MTM1		SYT1		TAF4		PXYLP1
	PPIA		NFYC		TBXA2R		TLR4		FAM114A1
	TMEM70		NIT1		TULP3		TNFAIP1		SNORD30
	C14orf119		RNFT1		VPREB1		DOCK5		BAG2
	RCOR3		LARS		ZBTB14		C1orf21		RALGPS1
	GLT8D1		GALNT7		ZKSCAN8		TXNDC5		LCMT2
	PSMA1		PITPNA		OGFOD3		SFXN3		ZNF730
	PSMA4		PLAUR		GEMIN6		KBTBD7		MIR1296
	PSMD12		DNAJC10		SLC8B1		SFT2D3		MIR1204
	RPL6		CCNJ		PIF1		GTPBP10		FTX
	RPN1		VPS13C		CTC1		BMF		SH2D3A
	SRSF7		TMEM33		KDM7A		FMNL3		GJC1
	MFSD1		FBXW7		VMP1		HGS		FARP1
	MEAF6		MAML3		HIST1H2BE		APBA3		STAG3L5P-PVRIG2P-PILRB
	SLC2A3		ZNF280C		HIST1H3G		MINPP1		ANKRD44-IT1
	SMARCA2		TXLNG		SOX7		PDE4DIP		LINC01585
	TALDO1		PTGER4		HIST1H4D		KLHL21		KCNMB2
	TFRC		TWF1		HIST1H4K		FRAT1		MRVI1
	SEC62		RAB5B		C9orf64		GDF11		YAP1
	TYMS		RAP2B		GINS4		SEMA4B		CDX2
	UBE2G1		TRAPPC2		TPST1		WDR3		SEMA4F
	VCP		SHMT2		HPDL		ADCY3		SORBS1
	XPO1		SIAH2		ARHGEF39		WDR89		GPR83
	REEP5		SLC1A4		COX14		SLC25A25		PPARGC1A
	ARPC5L		SMARCD2		JMJD1C-AS1		STK11IP		RAPGEF4
	FYTTD1		SPN		ARRDC1-AS1		FAM129A		PRDM5
	VAMP8		SSRP1		TNFSF9		SLC43A2		LDB3
	STX16		TAF1		ASAP2		PLK3		FSTL1
	BUD31		TAF5		CTU1		C1orf216		MIR4435-2HG
	STX8		TBCC		TICRR		AP1S3		MIR4435-2HG
	CD37		TCF4		KNSTRN		SAMD10		CYP2U1
	RANBP9		TCTA		NOG		ZNF746		SLC2A13
	EIF1		UVRAG		CDC25C		DGKG		SLC26A9
	2006-03-01		YWHAH		MIR3679		ZNF567		IQCD
	ACAA2		DAP3		TRG-AS1		DPH1		TPH2
	NPC2		MAPKAP1		SENCR		RCAN1		SENP8
	SDCCAG8		ATP13A3		LAMP5-AS1		PLBD2		COL1A1
	RNF139		SAP30L		MIR6774		ABCA2		UBXN10
	NRM		E2F8		POP7		SLC36A1		COL5A2
	NUDCD2		RNF122		ECI2		2008-03-01		LINC01006
	DAD1		PYROXD1		SH2B2		FGFR1		FBLN7
	PPTC7		ATAD5		MLLT11		ZNF507		LRRC15
	COMMD6		C14orf159		KPTN		PLXND1		OCIAD2
	EIF4EBP1		TMEM62		IFT43		WDR7		LRGUK
	ERG		CALU		CFAP36		ZNF318		CLDN7
	ETFA		DOCK8		MB21D1		ABTB2		CCDC26
	FKBP3		CASP7		NT5C3B		GALNS		CRMP1
	RAB3GAP1		ZCCHC7		ARL14EP		PTPN23		ZSWIM3
	CCT5		NFATC2IP		ALKBH2		LRP10		ISM1
	FNBP1		MFSD5		LRR1		IPCEF1		MIPOL1
	ETHE1		ARHGAP19		USP43		GLCE		VSIG10L
	TMEM87A		CBLB		HEXIM2		GGA1		DACT3
	TIPARP		LDB1		NR2C2AP		GCNT2		CTH
	CKAP2		RSPRY1		NOL4L		SEC22A		BTBD19
	PPA2		ACBD5		SOGA1		METRNL		RMDN2
	GLO1		SHKBP1		ITPRIPL1		EPN1		RNF217
	MSH6		VAMP3		KCTD7		IGF2R		LINC00689
	NRBF2		CD38		CLECL1		IGFBP2		DGKH
	ANXA7		BAG4		CLEC14A		INPP5B		FAM171B
	HLA-E		PJA2		EID2		MAST4		PRICKLE2
	IDS		CDC25A		E2F6		ARHGDIA		MMAA
	APRT		BPTF		AAED1		OAS1		ZNF366
	KPNA2		SMAD4		PAOX		OAS3		DFNA5
	TOMM5		KIF20A		PATL2		OGG1		ADAMTS18
	NDUFB10		CDKN1A		RGL1		PCK2		DYNC1I1
	PRDX1		UBE4B		FAM208A		PRKAG2		DOCK1
	KLHL5		SEC23B		SPIDR		PLAU		EDA
	CRBN		CRTAP		CNPY4		ZFYVE1		EGF
	ATP6V1E1		RNASEH2A		PRR14L		PLTP		MPZL3
	PKD2		CENPF		NIFK-AS1		POLH		LINC00638
	LEPROT		MALT1		NATD1		NDE1		ALG14
	BRIX1		SPIN1		FAM133B		FAM120C		ZNF584
	PRPS1		DDX19B		TMEM186		DARS2		ENO2
	PSMA5		C12orf57		GAMT		PI4K2A		CCDC171
	PSMB2		MIR155HG		NSMF		TMEM63B		EPHA3
	PSME1		ARAP2		GREM1		FLVCR2		EPHA4
	RAN		PDZD8		RAB30		DNAJC11		C6orf163
	GNB4		TTC39C		NUDT7		TEX2		EYA1
	RNF5		DOCK11		SMIM24		SLC12A9		CCDC162P
	RPS3A		YDJC		DLL1		STAMBPL1		AK9
	SAT1		ESCO2		FBXO43		ANO8		PI16
	SDCBP		AARS		VPREB3		RXRA		FGF9
	MOAP1		DIAPH1		SAC3D1		ABHD4		FGF11
	TRA2B		FBXO45		HIST1H2AE		ZNF335		FRMPD1
	BNIP2		ZNF652		HIST2H2AB		XYLT2		PLEKHA6
	SOD1		SEC31A		OXLD1		LMBR1		ARSG
	SSB		KDM4C		C1orf228		IPPK		FOXF2
	TARBP1		R3HDM1		PRORSD1P		SUPT6H		LIMCH1
	C1QBP		PHGDH		RBM43		BMS1P4		PLCH1
	XBP1		FBXL5		SIMC1		VDR		SAMD4A
	SLBP		B4GALT1		KRT10		FTO		FSTL4
	YRDC		ARRDC2		LYSMD1		LRRK1		EPB41L3
	CALM2		SLC43A3		PRSS57		TCTN2		KIAA1024
	CAT		CLEC2D		MBNL1-AS1		RMI1		MTCL1
	MED30		ANXA1		C16orf74		TARS2		ADGRL3
	SYNGR1		IGF1R		MIR17HG		EEPD1		FMO4
	SYAP1		IREB2		ARVCF		SLC7A5		ZFPM2
	GMFG		MAN2A1		GOLGA6L9		KDM5C		TTC9
	CD47		CIITA		MT1F		B3GNT5		SH3BP4
	CLINT1		GADD45B		NDUFC1		SLC10A7		FJX1
	LAPTM4A		NMT1		NPR1		ULK1		ANKRD18A
	PDCD6		ATP2B4		EMC9		PPP1R9B		MCOLN2
	CITED2		CHST11		ANKRD39		SERAC1		GABRA3
	VAV3		NIN		MAPKAPK5-AS1		KMO		SCML4
	NOP56		KRCC1		COA4		TNFRSF10B		ST6GALNAC3
	PITRM1		SPG21		PDCD1		HIP1R		CFAP45
	EBP		ANAPC5		THEM6		SLC7A6		PP7080
	CCT8		NOP16		DACT1		MAP3K6		MYRIP
	ERP29		PHF7		RTFDC1		CTDP1		WWTR1
	CBX3		PGM1		PDGFRB		PCSK7		ATRNL1
	CLK1		PLEK		GATB		TMEM129		ARHGEF26
	PLIN2		C21orf58		SERPINI2		CYTH1		RIBC2
	TMEM18		DDIT4		GSAP		SYTL3		ABCA12
	EMB		PLEKHB2		MED18		FAM53B		SPAG8
	HINT3		PDPR		DNAAF5		PHACTR2		AK5
	PPWD1		CEP55		KANSL2		RGP1		HSPB7
	ISCU		IMP3		C19orf24		POM121		PCDH17
	DDAH2		DEPDC1B		ZCWPW1		SMAD1		GLI3
	ASF1A		HDAC8		MED9		SMAD2		PCLO
	CLIC4		EXOSC5		SMG8		BCL2L11		CXCR3
	RSL1D1		RAB22A		MNS1		ABCB6		CLEC9A
	PYCARD		TAOK1		FAM72A		ABCA7		LPAR4
	RHOB		MKL1		RAB20		DLC1		SH3PXD2B
	ARHGDIB		RAP2A		BCAS4		ADARB1		RGMB
	RPL10A		KDM5A		DOK4		SLC27A3		ANK3
	NFKBIA		SAV1		PBK		LILRB4		GRIN2B
	NUCB2		BCL7A		MAP2K6		TBC1D8		GRHL1
	UBE2J1		SEC14L1		AKIP1		CHM		HGD
	PGD		SELPLG		HMCES		GALNT6		CDR2L
	ATP6AP1		DCLRE1C		ADPRM		MAN1B1		HOXA2
	PPIL3		CREB3L2		RSRP1		ERMAP		HOXC4
	OCIAD1		POLR3D		TP73-AS1		CLCN7		HTR1F
	C19orf60		AURKA		SMAGP		ZNF543		SLC35E4
	IFT57		TARS		ERMN		LYPLAL1		NAT8L
	INTS10		TCF19		STARD9		EMID1		ACER2
	LMBRD1		TPD52		VAT1L		STXBP5		NCKAP5
	PSMB5		TSC1		EPG5		HGSNAT		LRIT3
	PSMB7		UBE2H		RBMS2		VCAN		MACC1
	PSMD7		UCP2		SNORA33		B3GNTL1		ZNF530
	RFC4		ZBTB25		CCDC81		CTSZ		IL1R1
	RPL9		TRIM26		FKBPL		C18orf54		IPP
	RPS6		ZNF202		SMIM15		MLKL		NCR3LG1
	SATB1		ST8SIA4		HCG2040054		ERCC6		ZNF773
	BID		ERMP1		PCED1A		ERF		KCNMA1
	SKP1		PTP4A2		EXO5		FAH		KCNN3
	TFDP1		TSPAN14		BMP2		ALDH3A2		KLRC2
	TMEM109		BRIP1		SLAMF1		RASA3		LIPT2
	RNASEH2B		EFCAB2		FAM72B		CEP164		CCDC184
	TMEM14B		DDI2		SNORA75		MAST3		SHISA2
	NRIP1		OFD1		SNHG20		MAST2		UBE2Q2P1
	DDX59		ALG2		SLC16A2		CLCC1		SCIMP
	RPAIN		TNKS		SNORA7B		ANGEL1		XKR9
	PCGF5		TRIM24		SNORA53		PIGN		LINC00114
	API5		SAP30		SURF2		KCTD13		TEX41
	CDS2		CFLAR		TCTE3		NAPSB		CCSER1
	LONRF1		ATP6V0D1		TUBB2A		ZNF473		VLDLR-AS1
	SPAG7		TBRG4		ZNF736		SENP3		MAP2
	CD58		KIF23		TMEM242		FBXL4		MCC
	CD69		GOSR1		FLJ37453		NDOR1		MGAT3
	PSMD6		POLR1C		ZNF69		ANKRD52		MAP3K9
	RUNX1		IP6K1		ZSCAN9		INO80E		MOCS1
	SNHG8		KBTBD11		CACNB3		ABR		MPZ
	TOB1		FOXJ3		MRPL57		ANPEP		PTGER4P2-CDK2AP2P2
	TRIM22		FEM1B		AUNIP		GRINA		MUC1
	DCTN6		ACTR1A		TMEM223		ZDHHC8		MYLK
	AP4B1		RASGRP2		UQCC3		SNX8		MYO1D
	DBF4		PIBF1		USB1		HCK		NFIA
	C1orf162		ARFGEF2		MTERF1		ST6GALNAC6		NHS
	RASGEF1B		PLK4		MRM1		DNAJB2		ROR1
	DECR1		CTSC		ZSCAN16		GATS		TRIM72
	ECHS1		NUP50		F8A1		ILK		P2RY1
	EEF2		NEK6		HIST1H4I		IRF7		HGH1
	PHACTR1		SDCCAG3		HIST1H2AJ		ITGAX		PCDH12
	SNAPIN		TRAFD1		HIST1H2AB		B3GNT8		PDE6B
	PAN3		KIF2C		HIST2H2AC		AGRN		ENPP2
	KBTBD2		DIDO1		HIST1H2BG		KIF3C		RAB23
	GARS		WDR5		HIST1H2BN		C15orf52		PFN2
	GLRX		CASC4		HIST1H2BH		LCK		SERPINE2
	SSU72		IRGQ		HIST1H2BI		LDLR		PANK1
	C11orf21		PM20D2		HIST1H2BO		ABLIM1		ADAM22
	HLA-A		SESN3		HIST1H3J		FADS3		DLL4
	HLA-B		B3GALNT2		HIST1H4J		MTF1		RAB39A
	HLA-DMA		FAM91A1		HIST1H4B		FURIN		DCHS2
	MANBA		DHFR		SNX25		RRM2B		SYTL2
	PCBD1		HBEGF		TMEM133		HSD17B12		C19orf73
	HDDC2		E2F2		IMMP2L		PCYOX1		NUDT11
	PDCD2		PHC2		GTF2IRD2		NCKIPSD		STYK1
	TRIAP1		ELK4		PSD2		NT5DC3		SMPD3
	PIGC		ADNP2		MON1A		PLA2G4A		KIF21A
	PIGG		CLSTN1		KBTBD8		PLD1		PPP1R9A
	PCMTD2		LRCH1		CRACR2A		PLOD1		KDM4D
	ABHD10		NUP210		FAM220A		KCTD5		HHAT
	IARS2		VPS13A		CEP89		KLHDC4		GPRC5C
	MAPK8		ICMT		AJUBA		MFSD6		MESP1
	PSMB1		ZKSCAN5		SMIM3		MAP1S		FAM212B
	PSMB4		FUT4		SOCS1		CPPED1		DNAH7
	NIT2		GALNT2		TNFRSF18		FEM1A		PROX1
	PSMC2		ABHD12		MVB12B		UBQLN4		FSTL5
	PSMD4		VPS41		SLC25A14		PARP11		SPIRE1
	CHMP1B		GNS		STARD13		RPTOR		RGMA
	RPL12		PHPT1		NEXN		NCEH1		PRDM11
	RPS3		TBK1		ZNF845		RANBP10		GJC2
	MRPS25		ANKRD11		HACD1		ALS2		SALL4
	BLVRB		PARVB		LINC01278		GPR107		ARFGEF3
	TBC1D15		C18orf8		MGME1		RALGDS		NDRG2
	TAF7		H2AFX		TEX30		RPS6KB2		SLC12A5
	C9orf16		ANKRD13D		LENG9		PRDM15		NLGN4X
	TAF1D		ARAF		THEMIS2		PDF		MTUS1
	OGFRL1		KIFC1		ACYP2		TMPPE		CEP126
	ALG13		ACAT2		SLC23A1		SHMT1		SIPA1L2
	RNASEH2C		LAMP1				ENGASE		PCDH10
	SNHG3		LGALS9				INTS3		UNC79
	JAGN1		MAT2A				SMPD1		ADGRB2
	STX10		NFE2				SNTB2		ZDBF2
	HDAC3		NOTCH1				TBL1X		TLDC1
	EIF2S2		ITSN2				TSC2		KIAA1614
	UBE2L6		ACOX1				UGDH		PTPN13
	ATPIF1		NUSAP1				VAV2		PTPRD
	CHD1L		PDE4D				XPC		PTPRM
	CTR9		PHB				ZNF17		RGS7
	CD59		ATP6V1C1				MZF1		PAPPA2
	LPIN2		PLAGL2				ZBTB17		RORA
			PLK1				ZNF236		RORB
			SLC37A1				CACNB1		BDNF
			APBB1IP				MAFK		SCN8A
			FAM193B				NUDT18		SCN9A
			PPAT				RIN3		ROBO3
			FNBP1L				SLC35E1		ZSCAN31
			RNF220				C16orf70		LINC01128
			TRMT1				ABTB1		LINC00461
			SMPD4				RASSF7		CDCP1
			DEPDC1				GDPD5		WNK4
			LYAR				APOLD1		SLC6A9
			SLC48A1				TRIM8		SLC8A3
			NSFL1C				CARS		SLC22A5
			UBFD1				ZMIZ2		SOX11
			TMX4				RASSF4		SPTBN2
			PBXIP1				SPNS1		KLF5
			KIAA1524				MRI1		TBX15
			RDX				ZNF397		TEAD4
			RRM2				RAB11FIP4		TFAP2A
			FAM111A				KIAA1841		ICAM5
			STIL				CAMK1		RFX8
			MRPS6				APOL1		UGT8
			SMARCD1				ADAM15		VEGFC
			TGFBR1				NAV1		WNT10B
			TTC3				C12orf29		DDR1
			VCL				ZBTB22		CACNB4
			LAT2				HS6ST1		TMEM38A
			CAD				SFXN5		ELOVL6
			SNRNP25				ORMDL3		CHAC1
			DENND2D				TP53I11		TMEM231
			FBXO11				RAB3D		CCNJL
			SLC38A1				H6PD		FAM184A
			CAMK2G				ZNF646		CCDC7
			CAPG				ZFYVE16		FAM57A
			CAPNS1				SGSM2		MAP9
			PARP9				IRF4		ABCA11P
			ING5				ABCC5		ARMC9
			NSMAF				OPTN		CAB39L
			SYVN1				CTDSPL		AMN
			LRCH3				FSTL3		SPRY4
			SLC43A1				IFI30		ZNF239
			ZCCHC3				ARID3B		HIST1H2AK
			RUVBL1				CETN3		JAM3
			CBFA2T3				CYSLTR1		INHBE
			NAPA				USP20		BCO2
			MTMR1				SLC27A2		ATP13A4
			CCND3				PAPD7		SLC12A8
			ARHGAP11B				EMILIN1		SORBS2
			ZNF551				ADCY6		PLEKHA8
			CCNB2				SCAMP4		AIFM2
			MAPKAPK2				MGLL		KIAA1671
			TRIP4				LACTB		SNORD14D
			KIF20B				ZNF618		PIR
			PDIA4				KCTD12		KNDC1
			KIAA0232				CLN3		LGR5
			ARHGAP11A				IKBIP		MYOM1
			CDK1				SLC25A29		FGF18
			OSBPL2				ANKRD13B		VWA5B2
			CDC20				B3GALT6		ZNF486
			FAM20B				GRPEL2		L3MBTL4
			JOSD1				CRIP1		DGKI
			SLC23A2				CPNE8		MYLK3
			STX6				ZNF785		MAGI1
			STAM2				ADRB2		SNORD25
			CDR2				MBOAT1		ACVRL1
			NDC80				GIMAP8		GRAP2
			HAX1				MAMDC4		AKAP6
			ARPC1A				DENND5B		SLC25A27
			PHTF1				PWWP2B		GABBR2
			GLIPR1				DHCR24		GREB1
			RCC1				ABAT		ST18
			CHD3				PLD6		ARMCX2
			HELQ				CLN8
			ZNF689				ALDH1B1
			TBC1D20				TYSND1
			CD109				UBOX5
			CRK				DENND3
			SIK1				NT5C2
			CTSB				FCHO1
			AP1B1				DNMBP
			DEDD2				SYNE1
			DCK				SRGAP2
			DYNC1I2				GABARAPL1
			ABCA1				C20orf194
			ELF4				KANK2
			EPRS				SLC17A5
			EVI2A				COPG2
			ACSL4				GNAI1
			FANCG				ANGPT1
			REEP3				SLC25A42
			KDM1B				RAB37
			ATF6				ZSCAN22
			FRAT2				SP110
			SF3B3				IL13RA1
			FPGS				INPP4A
			APOL2				ITGA9
			SLC25A30				KLC1
			RAD54B				YPEL2
			GALC				SLC25A35
			TNFAIP8				LTBP3
			AHCTF1				MVD
			GANC				MX2
			SS18L1				NQO2
			CCDC69				PCCA
			INVS				PFKFB4
			NKIRAS2				PIK3R2
			TRIM59				PLXNA1
			GRB10				PLXNB1
			ORMDL2				SSH1
			FHOD1				PLEKHA5
			RACGAP1				CHPF2
			GSR				BCAS3
			EEF2K				SEMA4C
			CXXC1				SARS2
			MR1				CLN6
			UBAC2				C1orf159
			IDE				HERC6
			IL6ST				ANKZF1
			ACADVL				NADSYN1
			JAK2				PPP3R1
			KIF11				CHST12
			C6orf120				KIF16B
			NBR1				ZNF701
			MCM4				IFT122
			MDK				PRKCA
			ME2				PSMA2
			MAP3K1				SH3GLB2
			MFAP1				ANKRD50
			MKI67				ZNF490
			ATM				TBC1D14
			NDUFV1				TRMT5
			ATP2A3				BAHCC1
			P4HA1				QSOX1
			ASAP1				PTPN4
			LAP3				TRIB3
			PHF11				PYCR1
			SCAND1				BCKDHA
			FAM13B				RGS3
			ANAPC11				SLC25A19
			PCF11				RYK
			ATP6V1H				HEATR6
			TMBIM4				FIGNL1
			NUB1				TMBIM1
			ERAP1				OSGEPL1
			PLCG2				ZMAT3
			SH3TC1				FNDC3B
			ZNHIT6				METTL4
			ANKRD49				CCDC71
			DCAF16				PINK1
			MTMR10				ZBTB8A
			TRNAU1AP				SLC11A1
			CDCA8				DST
			TMLHE				SREBF1
			DOCK10				ZEB1
			ARHGEF40				THBS1
			PRR11				TLR2
			PAG1				TNS1
			SDR39U1				TRPM2
			DDX24				USF1
			PSMD2				XRCC3
			AGTRAP				ZNF8
			PSPH				AHNAK
			WDFY1				ATG9A
			GBA2				KLHL36
			CREBZF				C10orf88
			RBBP8				TMEM134
			RCN1				NUBPL
			TRIM27				INTS5
			RING1				FAM49A
			RPL17				ZNF93
			BICD1				LZTR1
			MRPL17				CAPN3
			NAPB				ACOX3
			LHPP				TRAPPC9
			TFB2M				EEA1
			CSRNP1				NUDT22
			ZNF574				C7orf50
			GINS3				ZGPAT
			MRPL44				ZBTB45
			SLC2A1				C9orf3
			SLC5A3				RELT
			SP100				PDXK
			ADAM17				ASMTL
			TAF4B				KCNK5
			MAP3K7				ADAM19
			TLR1				SQSTM1
			TNFAIP2				CCNA1
			TNFRSF1A				KIFC2
			ZKSCAN1				MTA1
			ZNF124				SLC16A3
			WDR77				ARHGEF1
			MRPL24				DYRK1B
			SMC6				ANKRD44
			KLHL15				NLRP12
			FAM117A				CABLES1
			DIAPH3				DLG5
			KIF18A				CHST2
			FERMT3				LY86
			ANKRD27				PITPNM1
			CASP8				PPM1F
			RNF135				ACAP1
			EIF1AD				CLSTN3
			DGKE				KLRK1
			PNPT1				KLRK1
			CCNA2				IL18BP
			HPS4				TLR6
			PRPF4				NDRG1
			MRRF				MERTK
			TRIP13				ATG7
			IKBKE				SLC19A2
			EDEM1				GNB5
			ESPL1				ZBTB6
			ZBTB24				CD3EAP
			KIF14				ADAM28
			TSPAN32				RAB31
			PDCD7				CIT
			ACTR3				AP4S1
			ZNF263				PACSIN2
			TRAP1				ADCY7
			MFSD10				TMEM106A
			SIGMAR1				EFHC1
			BCKDK				MED12L
			CDKN3				ARAP1
			WARS2				CLCN5
			MAD2L2				LRRK2
			SLC30A9				BTBD11
			VAT1				PLD4
			GLRX3				JDP2
			MTHFD2				NIPA1
			BTG3				ZNF720
			CCDC85B				ZNF816
			RCBTB2				ZNF813
			UBE2C				ZNF441
			WDR6				ZNF792
			RNF24				CRYBG3
			MGAT4A				NUDT16
			ABHD15				FAM173B
			SSX2IP				TMEM68
			FTSJ3				SLITRK4
			ANTXR2				CD300LF
			IQGAP3				TICAM1
			NUP35				CTNS
			ZFAND2B				ZNF827
			APOOL				MBLAC2
			C20orf96				GPR180
			PARP4				DFFB
			TMC8				DNASE2
			CCDC117				DVL1
			CTSD				CELSR3
			ZNF92				EPB41L2
			EMP1				FANCA
			SPNS3				FGD2
			SLC29A1				FOXK1
			ALAS1				ATF5
			FDPS				CD93
			INPP5F				PAXIP1
			SEPHS2				PHLPP2
			TPX2				KIF1B
			CEP152				RAP1GAP2
			AKR1B1				CUL9
			DNAJC9				TBC1D9
			BICD2				DTX4
			NCAPD3				EXOC7
			NCSTN				IQCE
			DDX58				SPECC1L
			PDSS1				EHBP1L1
			FUCA1				SLC41A1
			WIPI2				ZDHHC23
			ATP5S				TMCO4
			GM2A				COL24A1
			ZADH2				DNAH1
			RABL3				PTCD1
			GTF2H3				ACOT11
			NRBP1				SIPA1L1
			BAZ2B				PPP1R16B
			HAGH				TANC2
			HADH				FBXO25
			MSL1				TSPAN17
			INPP5A				FBXO10
			INSIG1				GBGT1
			ITGA6				GBP2
			ITGB2				ST6GALNAC4
			SFT2D2				CYTH4
			C12orf75				SGSM3
			LIMK2				POLM
			LNPEP				SLCO4A1
			LYL1				TRIB2
			MXD1				SNX10
			MARS				HIVEP1
			NDUFA10				HOXA3
			NFKBIE				HOXA4
			NINJ1				HOXA5
			NKTR				HOXA6
			ACO2				HOXA7
			DEF6				HSPG2
			AK3				NDST1
			PBX3				MYPOP
			ASCC1				ZKSCAN2
			GMNN				FAS
			PHF20L1				IL10RA
			CYB5R4				ITGA2B
			PCYT1A				ZNF749
			PDE3B				SNX30
			NBAS				LY9
			PEPD				STS
			PEX6				MFAP3
			PIK3R1				MN1
			POLR2D				MYH10
			GNG2				ZFHX3
			ANLN				CALHM2
			ETAA1				TUBD1
			SGTB				PHF21A
			PDP1				ARL6IP4
			HAUS4				CHST15
			FAM118A				PDE4A
			CDCA4				SNX9
			GPATCH2				PIK3C2B
			RCBTB1				PLCB3
			PSPC1				PON2
			PHF10				MIER2
			PGM2				TMEM106B
			ZNF654				XAF1
			LSG1				QPCTL
			HJURP				ZCCHC2
			NAGK				PQLC2
			ASF1B				ZSCAN2
			INTS9				HEATR3
			PRKAR2A				WIPI1
			NGLY1				SLFN12
			PRKAR2B				BSDC1
			MBNL3				PLCXD1
			CENPJ				GALNT10
			WSB2				BTBD2
			BCAP29				MYO5C
			PSMB9				SULF2
			TWSG1				PCDHGC5
			PSMC6				RNPEPL1
			PSMD1				CORO1B
			PSMD13				MRS2
			ZNF304				ZNF608
			PTPN6				PTK7
			PEX2				HOMEZ
			BCAT1				PITPNM2
			NAA35				WDFY4
			DHX35				PXN
			BCR				ZNF250
			MICAL1				RNASEL
			ST6GAL1				BDH1
			STAG3L4				SLC22A23
			SLC1A5				SBF1
			WNK1				KIF13A
			SPATS2				CARD9
			SLC12A2				SGSH
			STAT2				UNKL
			TCOF1				C16orf58
			BYSL				TNS3
			TOP2A				RMND5B
			UBA7				CRTC3
			UQCRC2				ST3GAL4
			XPNPEP1				ST3GAL3
			TMEM50B				MPPE1
			MIS12				SNAPC3
			DSCC1				SPARC
			TMEM185B				VAMP1
			CRELD2				TCF7
			HAUS3				THBS3
			ISOC2				TXK
			TRAF3IP3				ZAP70
			PABPN1				ZNF28
			RAB33B				PPDPF
			MXD3				ZXDC
			FAM107B				BBS10
			HYAL3				CLMN
			MARVELD1				TREML2
			TATDN1				SPEF2
			FAM172A				LRRC27
			SLC25A11				TSGA10
			KATNAL1				GFOD2
			FBXO30				PLA2G12A
			CEP78				ADAMTS10
			RHBDD1				CLTCL1
			ZDHHC16				DYSF
			NUDT16L1				ANGPTL6
			RECK				PIP5K1B
			DYRK2				OBSCN
			SLC9A7				PCBD2
			HIRIP3				ZCCHC9
			C19orf48				L3MBTL3
			DGKD				ZNF559
			RUNX3				ZNF594
			EIF4G3				TNRC18
			MBTPS1				PIGO
			CCNB1				FUT10
			MBD4				ZFYVE19
			CCNF				ATG4D
			RCCD1				PPP1R16A
			CENPL				CST7
			ZW10				PAQR8
			PNMA1				ITPRIP
			TIFA				CASK
			MARS2				DCHS1
			EIF2AK3				B4GALT2
			TM9SF4				SERPINH1
			GINS1				SYNGAP1
			FIG4				PROM1
			NCAPD2				BTRC
			CDC25B				ABCC10
			MED12				RPS6KA4
			HDAC6				LIMD1
			TROAP				ACVR1
			PPIF				ZNF616
			MPHOSPH9				SLC16A5
			CD96				UAP1L1
			PLIN3				C12orf65
			AKR1A1				CALML4
			ATP8A1				TMEM44
			PRMT5				PGAP3
			CD2BP2				TADA2B
			TACC3				NMT2
			TIMM44				CD86
			NPRL2				HOMER3
			FAM189B				SH3BP5
			POLD3				ENTPD1
			EHD1				CROCC
			SERINC3				ULK2
			IRAK3				ARHGAP32
			SNX18				KIAA0513
			TUBGCP5				RHOBTB1
			CKS2
			TARSL2
			MSI2
			ALDH16A1
			ANKLE1
			CSNK1E
			CTBS
			CTSO
			RNF38
			SPICE1
			TMEM65
			FAM120AOS
			DAXX
			PGAM5
			ANO6
			U2AF1L4
			ETFB
			CCNY
			NSUN6
			SKA3
			TCF25
			SWAP70
			ZBTB43
			CLASP2
			FLII
			GGA3
			METAP1
			FAM120A
			PPIP5K2
			RRP8
			ABCB10
			ADAT1
			PISD
			MCM9
			SERINC5
			PGLS
			FBXL3
			FBXO5
			GCDH
			GOLGA1
			GPI
			TSEN54
			HKR1
			ATP11C
			DBNL
			PYCR2
			NCKAP1L
			ANXA5
			HMMR
			MMAB
			HSD17B4
			IDH3G
			IGLL1
			ITPKB
			LAIR1
			MAD2L1
			MBP
			ABCC1
			MYD88
			NBN
			NCK1
			NEK2
			ATP2B1
			OGDH
			PAM
			PCCB
			TEX264
			GTSE1
			PPHLN1
			C9orf78
			PEX1
			PFKL
			CDK14
			PGGT1B
			ATP6V1A
			NANS
			CCDC93
			AHI1
			ZNF586
			PPID
			PXK
			RNF125
			PARP16
			PLEKHJ1
			FAIM
			RAVER2
			PI4K2B
			PPP3CC
			PRCP
			KLHL9
			PRKX
			KIF15
			PSMC3
			TMEM159
			PELI1
			THAP11
			SPC25
			RHBDD2
			ODF2L
			WDR48
			FAM160B1
			BARD1
			RASA2
			RFC2
			RFC5
			FASTKD5
			AGBL5
			RNPEP
			SARS
			XYLT1
			SETMAR
			POLR1E
			TTC31
			NT5DC2
			SLC7A1
			BSG
			SYK
			TCF3
			PRDX2
			TFDP2
			TTK
			KDM6A
			EZR
			WRN
			XRCC2
			ZNF12
			TMEM106C
			ZNF557
			NAA16
			FN3KRP
			AAGAB
			WDR59
			NAA40
			IFT74
			SPG11
			REEP4
			NDFIP1
			ITFG1
			TDRD3
			URM1
			FAM83D
			CASP3
			AMMECR1L
			YPEL3
			MEX3B
			MRPL45
			NCK2
			SUPT3H
			ATAD1
			MUM1
			ENC1
			EIF4EBP3
			HERC1
			FGD3
			ERI1
			GADD45GIP1
			PRC1
			ZNF700
			PPP1R3E
			PYGO2
			SESTD1
			EXO1
			CYTH3
			SOCS6
			PIGB
			EEF1E1
			CD81
			DLGAP5
			MELK
			IQSEC1
			ARHGAP25
			SLC12A6
			ADA
			ARL4C
			CDKN1B
			SEMA4D
			RPP30
			CENPA
			SPAG5
			SLC12A7
			LILRA2
			DDX52
			RCAN3
			GLMN
			NUDT4
			POLI
			XPOT
			VPS26B
			CDCA5
			SLC25A26
			DIS3L
			ZNF511
			CYP2R1
			CANT1
			CMPK2
			UBR3
			ADAT2
			FAM69B
			STK35
			VTI1A
			CDCA2
			ZNF791
			DDB2
			PARP15
			COCH
			AFG3L1P
			NLRC3
			ARHGAP27
			C3orf58
			FANCF
			SAMD9L
			FARSA
			ABCB7
			SKA1
			DAGLB
			ZNRF2
			FECH
			FHL1
			ICK
			FASTKD2
			TMCC1
			GGA2
			FRMD4B
			GRAMD4
			CEP68
			LARP4B
			ATG4B
			NCAPH
			TMED3
			LRRC8B
			FXN
			KIF4A
			WDR27
			BRWD3
			GABPB1
			MTHFD1L
			ASPM
			GAPVD1
			GBP3
			PTPN18
			KAT2A
			GCNT1
			CYFIP2
			AMPD3
			GLB1
			TMEM97
			GOT1
			PGM2L1
			ZNF776
			DUSP28
			RPUSD3
			MKNK2
			UBE2T
			RANGRF
			GSTM4
			GUCY1A3
			BIRC3
			BIRC5
			FOXK2
			LGALS8
			LIG4
			FADS1
			LPP
			ZBTB34
			DNAJB9
			MGAT5
			MICB
			ASNS
			CCDC88C
			NAGA
			NDUFS1
			OXA1L
			GEMIN4
			KCTD3
			ZNF639
			CRIM1
			TBC1D7
			TRPV2
			ANAPC7
			FAM8A1
			PDE8A
			ESF1
			PDK1
			CYB5R1
			INPP5K
			PFKP
			PHF2
			UHRF1BP1
			COMMD4
			TIPIN
			RBM28
			SEC61A2
			NEIL3
			QRSL1
			CCDC91
			ACER3
			NIPSNAP3B
			ZNF331
			ZCCHC8
			NPLOC4
			NSUN5
			PRKCD
			BBX
			TULP4
			SENP7
			RIMKLB
			USP28
			ZBTB26
			ZSWIM6
			RBMS1
			RFXAP
			PPCDC
			NCAPG
			GZF1
			SUSD1
			YTHDC2
			DCLRE1B
			SLC15A2
			PHACTR4
			SOD2
			SVIL
			ZNF22
			ZNF33A
			ZNF75D
			ZNF134
			FASTKD3
			TRAPPC6A
			C17orf62
			GCC1
			CEP97
			SHCBP1
			DHDDS
			CEP76
			ATAT1
			ZNF614
			PTGES2
			EDC3
			STAM
			PRR3
			CDT1
			CABLES2
			ADPGK
			HSDL1
			CASP6
			LCOR
			FAM120B
			UNC119B
			ZNF496
			PPFIA1
			SNHG12
			ZNF518B
			MAPKAPK5
			TAX1BP1
			BTBD6
			ZNF766
			ZNF468
			C5orf30
			ADCK2
			RPS19BP1
			SLFN11
			AURKB
			MFHAS1
			UBE4A
			CDYL
			UBE3C
			PPP6R2
			RNF144A
			TRANK1
			CLEC2B
