# Supplementary material for: A KMT2A-AFF1 gene regulatory network highlights the role of core transcription factors and reveals the regulatory logic of key downstream target genes
Source: Genome Res. 2021 Jul;31(7):1159–73. doi: 10.1101/gr.268490.120 (PMC8256865; doi:10.1101/gr.268490.120)
Supplement: Supplemental Material [file supp_gr.268490.120_Supplemental_Data_S3.xlsx]

## Sheet: Legend
Supplemental Data S3. Nascent RNA-seq results PANTHER pathway enrichment
Nascent RNA-seq results after RUNX1 siRNA knockdown and PANTHER pathway enrichment of DEGs in common between KMT2A-AFF1 and RUNX1 siRNA treatment.

## Sheet: EdgeR results- SEM RUNX1 siRNA
EdgeR statistical analysis results
Geneid	logFC	PValue	FDR
ZNF521	4.81818	0	0
NCKAP5	4.69754	0	0
ATXN1	3.15633	0	0
TENM4	2.70927	2.80732e-278	9.76525e-275
TIAM2	2.82406	3.15718e-272	8.78581e-269
NAV2	2.88905	4.82699e-219	1.11938e-215
NLGN4X	2.24554	5.75645e-216	1.14422e-212
CD24	3.24246	4.34571e-191	7.55828e-188
SLC4A8	2.33274	5.97087e-175	9.23097e-172
BACH2	2.10409	3.51073e-173	4.88483e-170
KCNJ2	2.99235	2.56779e-165	3.24801e-162
ROR1	3.05958	9.61358e-158	1.11469e-154
RABGAP1L	1.97861	1.34995e-154	1.44486e-151
LIMCH1	2.53619	3.02211e-153	3.00354e-150
SMAD3	2.19098	6.06606e-149	5.62687e-146
PIP5K1B	2.32105	2.20397e-143	1.91663e-140
ZNF318	1.6203	1.98284e-139	1.62289e-136
ITPR1	1.6992	3.67688e-137	2.84223e-134
GBP2	2.47816	2.25265e-130	1.64965e-127
MYO10	1.58106	2.37778e-127	1.65422e-124
PLCB1	2.30805	4.1061e-121	2.72058e-118
DOCK9	3.66033	7.78667e-116	4.92472e-113
EFR3B	2.87756	1.23267e-112	7.45713e-110
CTTN	2.2184	1.74111e-112	1.00941e-109
DOK3	1.41713	6.30671e-104	3.51006e-101
CABLES1	1.98735	1.31473e-101	7.03583e-99
GLYATL2	5.70154	1.35351e-98	6.97509e-96
SYVN1	1.46022	2.49202e-97	1.23835e-94
RYK	1.97962	2.60498e-97	1.24985e-94
ABLIM1	1.81213	1.06543e-95	4.94149e-93
SETBP1	2.00846	2.9107e-95	1.30644e-92
LRIG1	1.27557	6.99391e-91	3.04104e-88
GRAMD4	1.57509	2.89847e-90	1.2221e-87
SORL1	1.4917	6.68567e-89	2.73601e-86
BCL6	1.72795	3.17536e-88	1.26234e-85
SORBS2	-3.90923	4.73233e-88	1.82905e-85
VCAN	-1.88329	4.64712e-86	1.74757e-83
TEC	1.37232	1.28851e-85	4.60122e-83
ARID5B	1.23692	1.28969e-85	4.60122e-83
FHOD3	2.57222	1.70438e-82	5.92867e-80
TRIM2	2.6568	1.76283e-82	5.98246e-80
CMAHP	1.91388	1.39717e-80	4.62862e-78
MTURN	1.66813	5.24919e-80	1.69854e-77
TMEM263	1.57534	2.28698e-79	7.23205e-77
RTN4RL1	2.26508	8.41452e-78	2.60177e-75
SAMD4A	1.3653	9.56529e-78	2.89329e-75
PLXNC1	1.32549	1.02501e-76	3.03447e-74
ETS1	1.28648	1.90808e-74	5.53105e-72
MAP7	1.95234	4.68155e-74	1.32937e-71
RAPH1	5.08258	1.44992e-72	4.03484e-70
KIAA1614	1.90353	2.35233e-72	6.41772e-70
CD109	1.22253	3.9522e-72	1.05752e-69
KIAA0922	1.12989	6.78458e-72	1.78114e-69
TANC2	1.0947	2.37466e-71	6.1187e-69
GCSAM	2.56073	3.27409e-71	8.28286e-69
SCG2	4.20134	4.90703e-70	1.21922e-67
PGM2	1.17329	5.38756e-70	1.31513e-67
AIM1	1.62323	2.5836e-69	6.19797e-67
KIF26B	4.22081	6.8741e-69	1.62112e-66
FRY	1.51801	2.71832e-68	6.30379e-66
SLAMF1	1.35847	1.06412e-67	2.42725e-65
PLCH1	-2.06372	9.32829e-66	2.09345e-63
HDAC9	1.39461	1.70184e-65	3.75864e-63
CD22	1.05844	3.68735e-65	8.01652e-63
PLEKHG3	-1.35414	3.14069e-64	6.72302e-62
SMAP1	1.12313	5.16246e-64	1.08834e-61
KDM7A	1.20852	4.72729e-63	9.6789e-61
SMIM14	2.35967	4.73024e-63	9.6789e-61
ANKRD33B	0.986537	1.26967e-62	2.56033e-60
ITPR2	1.1431	1.7105e-62	3.39999e-60
RAG2	1.42304	6.12446e-62	1.20022e-59
FUT7	-2.12501	1.48635e-61	2.87237e-59
MFAP3L	1.15503	4.0851e-61	7.78631e-59
RAPGEF3	2.12324	6.40514e-61	1.20434e-58
F2R	3.90944	1.51601e-60	2.81251e-58
MTM1	1.54395	2.68082e-60	4.90801e-58
IL16	1.23776	6.21002e-60	1.12216e-57
BLNK	2.27996	3.90538e-59	6.96659e-57
AOX2P	2.6386	1.36995e-58	2.41285e-56
PLEC	1.36456	2.63403e-56	4.58123e-54
GNAZ	1.26534	1.12142e-55	1.92636e-53
ITGB7	-1.36029	3.13173e-54	5.314e-52
GPR52	2.03631	5.57409e-54	9.34432e-52
APBA1	1.12277	1.91127e-53	3.16588e-51
SPTBN1	0.867784	6.53234e-53	1.06931e-50
SLIT2	2.39823	1.05015e-52	1.69905e-50
RAB11FIP4	1.2079	1.6486e-52	2.63663e-50
A2M	-2.38146	3.56004e-52	5.62891e-50
ATP8B4	-0.933579	7.0853e-52	1.10769e-49
SPATS2L	1.18917	7.87108e-52	1.21687e-49
MAP3K1	0.895084	2.99192e-51	4.57468e-49
MAGI1	1.14913	5.0078e-51	7.57375e-49
DSE	-1.2285	1.33615e-50	1.99906e-48
TCP11L2	1.63419	9.15693e-50	1.35542e-47
SH3BP4	1.23657	1.0054e-49	1.47254e-47
CRMP1	1.21043	2.10149e-49	3.04585e-47
FAM101B	-1.24417	1.49003e-48	2.13734e-46
NKD2	2.09538	1.56782e-48	2.22599e-46
DENND2D	1.11761	1.88318e-48	2.64673e-46
LOC101927701	3.37513	3.44487e-48	4.79319e-46
NCKAP1	2.59727	4.29782e-48	5.92078e-46
STAT5A	1.41977	7.9349e-48	1.08241e-45
MCTP2	1.59361	2.09486e-47	2.82989e-45
LDLRAD4	1.02223	3.54655e-47	4.74487e-45
KLHL6	0.925114	4.00567e-47	5.30808e-45
ACKR4	1.7456	4.58271e-47	6.01546e-45
DACT1	2.1874	2.25963e-46	2.93836e-44
FCRLA	1.37951	3.37874e-46	4.35295e-44
IKZF1	0.926292	2.19367e-45	2.80025e-43
PGM2L1	1.20413	3.49246e-45	4.41764e-43
PRKCQ	-1.51941	3.91592e-45	4.90866e-43
LOC100130872	1.09406	2.10372e-44	2.61349e-42
VLDLR	-1.14601	2.48965e-44	3.06557e-42
ETV5	0.951918	3.23506e-44	3.94847e-42
NFAT5	1.13444	6.49792e-44	7.86191e-42
KIF16B	0.941416	2.36404e-43	2.83562e-41
DYNC1I1	2.58721	3.1514e-43	3.74775e-41
ANPEP	0.941099	4.83965e-43	5.70669e-41
GFOD1	1.45948	4.91812e-43	5.75048e-41
MLLT4	0.804474	5.07357e-43	5.88281e-41
SCIMP	1.33248	5.28147e-43	6.07325e-41
FRMD4B	0.861928	5.86874e-43	6.69325e-41
NRCAM	1.68626	6.70101e-43	7.58031e-41
DLL1	1.65771	9.54377e-43	1.0709e-40
FRMPD1	2.09542	1.0262e-42	1.14229e-40
PDPN	3.10763	1.1477e-42	1.26738e-40
PITPNM2	1.03898	2.75381e-42	3.01704e-40
TRHDE	0.763389	1.06252e-41	1.15499e-39
SCML4	1.24132	1.09075e-41	1.17649e-39
FZD7	1.9493	1.36766e-41	1.46381e-39
PPM1H	1.04411	1.84579e-41	1.96048e-39
NID2	2.60725	2.16129e-41	2.2782e-39
APBB2	0.7688	3.43998e-41	3.59878e-39
SLC8A3	1.23415	3.54674e-41	3.68279e-39
MOB3B	-1.0426	8.5143e-41	8.77541e-39
FOXO1	1.58658	1.14962e-40	1.17617e-38
MAST4	0.952399	2.11992e-40	2.15304e-38
RBSN	1.04364	2.5507e-40	2.57177e-38
ANTXRLP1	2.27705	4.71238e-40	4.71712e-38
TLR10	1.0203	5.51799e-40	5.48409e-38
CPT1A	1.79499	5.87701e-40	5.79948e-38
AK5	1.24227	1.48507e-39	1.45516e-37
DMPK	1.15743	2.25918e-39	2.1982e-37
RASGRP3	1.8198	2.46254e-39	2.37943e-37
CHST15	-1.0291	2.97038e-39	2.85033e-37
LPAR1	-3.02973	3.6349e-39	3.46411e-37
GLCCI1	1.3163	3.73459e-39	3.53491e-37
TNFRSF11A	2.04049	4.95993e-39	4.663e-37
KANK2	0.955256	6.91504e-39	6.45744e-37
SORBS1	0.934823	2.07981e-38	1.92923e-36
CCR1	-2.67	3.04787e-38	2.80848e-36
NR3C2	1.74789	3.43224e-38	3.14185e-36
MX2	1.3306	4.56134e-38	4.14378e-36
ZBTB46	2.35428	4.58633e-38	4.14378e-36
TNFRSF10B	0.888215	7.36516e-38	6.61154e-36
BEST3	6.59413	9.1739e-38	8.18242e-36
MAP2	1.40571	1.2674e-37	1.12322e-35
MYRIP	1.0389	1.69952e-37	1.49666e-35
THSD4	2.47796	3.85391e-37	3.37254e-35
DMWD	1.14732	4.66536e-37	4.05711e-35
KIAA1549	1.10358	5.61301e-37	4.84652e-35
CLCN4	1.41995	5.64277e-37	4.84652e-35
IL21R	-0.857235	9.27121e-37	7.91408e-35
FGFR1	0.858385	9.40431e-37	7.97875e-35
MRC2	-1.19306	1.03262e-36	8.70777e-35
PRICKLE1	1.13599	1.61825e-36	1.35572e-34
PPM1F	0.937502	1.62718e-36	1.35572e-34
SESN3	1.15422	1.7878e-36	1.48068e-34
CDC14B	4.22162	2.25415e-36	1.85587e-34
ACTN1	-0.852602	5.29852e-36	4.33668e-34
SLC27A2	1.17444	5.90175e-36	4.80216e-34
LRRC15	1.90401	7.96963e-36	6.44706e-34
CLTC	0.653479	1.46524e-35	1.17846e-33
SDC2	-2.03694	1.70073e-35	1.36e-33
2003-03-01	1.31149	1.91098e-35	1.51939e-33
CCDC88C	0.74712	3.09422e-35	2.44619e-33
KCNK3	0.938391	3.24279e-35	2.54916e-33
BMP4	1.08692	4.82573e-35	3.7722e-33
RHOBTB2	1.23618	4.97202e-35	3.86484e-33
ADAMTS17	0.968363	1.49931e-34	1.15897e-32
TMEM204	2.02567	1.8517e-34	1.42345e-32
SLC1A4	-0.887665	2.23178e-34	1.70621e-32
GCNT1	0.785689	2.40577e-34	1.82917e-32
PRUNE2	1.02385	2.68931e-34	2.03364e-32
RRN3P3	1.03423	3.01651e-34	2.26874e-32
NEURL1B	1.00493	4.79176e-34	3.58454e-32
S100A10	1.07826	4.91575e-34	3.65763e-32
SLA	-1.01083	7.71791e-34	5.71208e-32
NFKBIZ	-0.946914	8.90822e-34	6.55815e-32
TXK	1.75412	1.2273e-33	8.98774e-32
ELOVL6	-0.704285	2.62139e-33	1.90964e-31
IFNLR1	1.47061	2.99436e-33	2.16997e-31
CCND1	2.11086	4.4896e-33	3.2367e-31
SYK	0.84296	6.05364e-33	4.34177e-31
KBTBD11	1.17263	6.10995e-33	4.35968e-31
GNG7	1.00404	6.78791e-33	4.81872e-31
PLXNA2	4.36661	7.14001e-33	5.04295e-31
AGPAT3	1.38798	7.71061e-33	5.41846e-31
C12orf75	-1.32565	9.04206e-33	6.32217e-31
ROBO1	0.749619	1.25408e-32	8.72461e-31
DLG1	0.822966	1.37852e-32	9.54262e-31
TCAF2	1.43314	1.51811e-32	1.04569e-30
ST6GAL1	0.715318	3.14736e-32	2.15726e-30
STARD4	-0.817524	3.25021e-32	2.21684e-30
CLTCL1	1.12522	3.52768e-32	2.39435e-30
UST	1.38225	3.63089e-32	2.45244e-30
EMP1	-0.913315	5.07218e-32	3.40939e-30
ELK3	0.857743	5.40779e-32	3.6175e-30
TNFRSF10D	0.875099	9.16096e-32	6.09883e-30
ADARB1	1.0405	1.00498e-31	6.65872e-30
LMO4	-0.737824	1.09923e-31	7.24866e-30
LIPE	1.11186	1.38726e-31	9.10488e-30
POU2AF1	0.921059	1.87364e-31	1.22394e-29
CMTM7	1.66966	2.37753e-31	1.54584e-29
NOL4L	0.814441	3.25478e-31	2.10637e-29
CXCR4	-0.790651	3.76342e-31	2.42427e-29
PTPRB	0.866212	4.62217e-31	2.96373e-29
GFPT1	0.874682	6.49805e-31	4.14742e-29
CHAC1	-2.11316	6.71e-31	4.26315e-29
TBC1D30	0.868887	2.11823e-30	1.33969e-28
ISG20	1.00406	3.25789e-30	2.05114e-28
TET1	2.43245	3.29926e-30	2.06783e-28
PTPN14	0.803128	3.69581e-30	2.30599e-28
ZNF792	0.854098	5.33434e-30	3.31348e-28
CD79B	1.00695	9.68312e-30	5.98804e-28
HIP1R	1.13084	1.62617e-29	1.00117e-27
CCSER1	1.25339	1.98526e-29	1.21687e-27
ATP10A	-1.19562	2.62634e-29	1.60276e-27
TLDC2	3.06945	5.52649e-29	3.35789e-27
ADGRL2	2.09966	5.95074e-29	3.59994e-27
UNC5C	8.09636	6.47922e-29	3.90268e-27
RFC3	-0.722982	7.52498e-29	4.51304e-27
PVRL1	-1.03705	1.07578e-28	6.4242e-27
PLAUR	-1.02156	1.31541e-28	7.82162e-27
GJA5	4.76681	1.64139e-28	9.7184e-27
MXD4	1.05029	1.93637e-28	1.14164e-26
ASAP1	0.764628	2.26519e-28	1.32986e-26
OGG1	1.10345	2.29597e-28	1.34228e-26
LRRC14B	1.33367	2.42783e-28	1.41343e-26
TOX	1.3452	2.46752e-28	1.43054e-26
EMP3	-0.961237	2.66129e-28	1.53648e-26
RAPGEF1	0.682686	2.75765e-28	1.58553e-26
PTPRC	-0.992048	3.14425e-28	1.80038e-26
CD37	1.49591	3.38791e-28	1.93194e-26
TAGAP	-0.981094	7.86701e-28	4.4561e-26
INPP5D	0.652383	7.87841e-28	4.4561e-26
ZNF608	0.995173	1.32682e-27	7.47425e-26
PTPRG	0.721731	1.81758e-27	1.01975e-25
MTHFD2	-0.667115	2.37619e-27	1.3278e-25
NOTCH2	0.745875	2.6289e-27	1.46314e-25
AKR1C6P	1.79211	3.02641e-27	1.67767e-25
GRINA	1.27734	3.98616e-27	2.20093e-25
ITPKB	0.860734	4.01537e-27	2.20829e-25
ALDH5A1	0.804605	4.58487e-27	2.51157e-25
QSOX1	0.85596	5.04434e-27	2.75243e-25
SLCO4C1	-1.73594	6.63085e-27	3.60397e-25
EGFL7	3.51674	8.19547e-27	4.43703e-25
PHGDH	-0.886702	9.20256e-27	4.96296e-25
INPPL1	0.810708	1.58603e-26	8.52045e-25
KHDRBS3	0.937224	2.29763e-26	1.22958e-24
SCN3A	1.62811	2.30826e-26	1.23054e-24
DAGLB	0.851804	2.87708e-26	1.52793e-24
ARHGAP44	1.06606	2.99645e-26	1.58527e-24
KDM1B	0.854113	3.2852e-26	1.73145e-24
PSAT1	-0.940165	3.6827e-26	1.93363e-24
VAT1L	0.637321	5.77706e-26	3.02188e-24
NFE2	-2.67431	6.35119e-26	3.30975e-24
EPHB3	-2.18542	6.69711e-26	3.477e-24
EIF4EBP1	-0.975083	7.19261e-26	3.72037e-24
INPP4B	1.43796	8.421e-26	4.33962e-24
ZCCHC5	-3.5478	9.514e-26	4.88479e-24
GPT2	-1.17385	1.1639e-25	5.95385e-24
GLRX	0.856775	1.20347e-25	6.13371e-24
TRIM72	0.960968	1.38239e-25	7.0199e-24
S1PR1	3.47685	1.43615e-25	7.2664e-24
JUP	0.812024	1.69314e-25	8.53561e-24
GPR85	-1.27223	1.91749e-25	9.63178e-24
ZEB1	0.859785	2.41823e-25	1.21033e-23
SNX9	0.874925	4.34373e-25	2.16626e-23
ADCY9	0.830137	4.70459e-25	2.33785e-23
GATS	0.866289	5.23403e-25	2.59168e-23
PTPRD	1.13914	5.44598e-25	2.68707e-23
P2RX1	0.689397	1.02847e-24	5.05658e-23
LAX1	2.34961	1.1587e-24	5.6768e-23
SPIB	-1.18548	1.20153e-24	5.866e-23
MYO1F	-1.01376	1.21928e-24	5.93186e-23
EYA4	-1.05437	1.48016e-24	7.17595e-23
TNFRSF14	2.5378	1.48708e-24	7.18444e-23
SPRY1	0.990021	1.53245e-24	7.37802e-23
KLF7	-0.595667	1.74912e-24	8.39217e-23
LEF1	0.559666	1.87261e-24	8.95377e-23
SLC6A6	0.955274	1.90181e-24	9.06227e-23
FOXN2	-0.62614	3.47391e-24	1.64899e-22
PBXIP1	0.860885	3.48428e-24	1.64899e-22
SIDT1	0.976506	3.89448e-24	1.83687e-22
SYNE1	0.798611	4.29254e-24	2.01778e-22
CEBPA	-0.961488	4.98604e-24	2.33588e-22
PPM1E	1.65008	5.24011e-24	2.44667e-22
WWC2	1.15392	6.96343e-24	3.24044e-22
PRKACB	0.759637	7.58721e-24	3.51895e-22
C9orf139	-1.5333	9.46617e-24	4.37582e-22
SLC8A1	0.839177	9.78921e-24	4.51017e-22
EYA1	1.23272	1.11204e-23	5.10655e-22
SEC24D	0.725471	1.12894e-23	5.16712e-22
LSM14B	0.608828	1.25498e-23	5.72519e-22
CD70	1.89261	1.3884e-23	6.31312e-22
EVI5	0.761846	1.84374e-23	8.35631e-22
CCNA1	-1.85089	1.8548e-23	8.37913e-22
TNS1	-2.5502	1.86237e-23	8.38609e-22
TRAF3IP2	0.684614	2.02081e-23	9.07018e-22
GIT2	0.622832	2.16547e-23	9.6882e-22
FHL1	-0.692675	2.30247e-23	1.02681e-21
CRAMP1L	0.643024	2.33309e-23	1.03714e-21
CAPG	-1.73814	2.43909e-23	1.08081e-21
PCSK6	0.821276	2.70789e-23	1.19467e-21
MAPK13	1.83376	2.7132e-23	1.19467e-21
PRDM11	1.45835	2.82575e-23	1.2403e-21
NANP	-0.756621	3.88039e-23	1.69785e-21
MAP3K9	1.00657	4.80664e-23	2.09654e-21
RPS6KL1	1.0227	5.27339e-23	2.29294e-21
FARP1	0.802593	5.59381e-23	2.42196e-21
GARS	-0.64474	5.60494e-23	2.42196e-21
NFATC1	0.8002	8.36919e-23	3.60523e-21
HELZ2	1.2054	8.76945e-23	3.76599e-21
HOXA3	0.784401	1.05367e-22	4.51099e-21
KIF13A	0.633066	1.33738e-22	5.70808e-21
RFXAP	-0.832728	1.38485e-22	5.89259e-21
ITGAL	-0.699584	1.43319e-22	6.07968e-21
RNF217	0.917703	1.64406e-22	6.95304e-21
MTMR12	0.56925	1.74492e-22	7.35515e-21
FADS1	-0.653205	1.74972e-22	7.35515e-21
SMIM3	0.848562	1.79615e-22	7.52759e-21
ICOSLG	0.97568	1.83006e-22	7.64667e-21
SLC44A2	0.617501	2.04183e-22	8.506e-21
SNX10	0.834007	2.22964e-22	9.26067e-21
MLLT4-AS1	3.3083	2.34027e-22	9.69121e-21
FGF5	0.988744	2.36172e-22	9.75105e-21
MCC	1.97519	2.50022e-22	1.02923e-20
TBC1D9	-0.723696	2.54546e-22	1.04477e-20
NEK3	1.28356	3.17825e-22	1.30065e-20
OAS2	0.964828	3.68482e-22	1.50354e-20
VPS26B	0.895537	3.87237e-22	1.57544e-20
PITPNC1	0.57051	4.54749e-22	1.84472e-20
BAIAP2L1	1.32649	4.72307e-22	1.91037e-20
C10orf71	1.10287	5.77365e-22	2.32854e-20
NRAP	5.12051	6.93244e-22	2.7878e-20
POLH	0.622639	8.08992e-22	3.24389e-20
PSPH	-0.766097	8.48039e-22	3.39069e-20
CTGF	1.14792	9.08245e-22	3.62101e-20
HSH2D	-0.637693	1.27709e-21	5.07697e-20
UNC5B	-1.26623	1.28227e-21	5.08306e-20
GNAQ	0.512643	1.47302e-21	5.81669e-20
BMF	-0.841503	1.4797e-21	5.81669e-20
NFIA	1.14955	1.47988e-21	5.81669e-20
LCP2	0.692945	2.33847e-21	9.16547e-20
FAM65B	0.698763	2.41659e-21	9.44506e-20
STS	0.699154	2.64192e-21	1.02968e-19
SH3RF1	-0.780457	2.94962e-21	1.1464e-19
TMC6	0.784134	3.65444e-21	1.41638e-19
ASB2	1.8973	3.77111e-21	1.45753e-19
IPCEF1	0.772612	4.34354e-21	1.67413e-19
CHRDL1	2.8265	4.91401e-21	1.88877e-19
TMEM136	0.713972	5.29373e-21	2.02912e-19
CITED2	0.861001	5.39171e-21	2.061e-19
LRRC16A	0.903692	6.1853e-21	2.35787e-19
KIAA1671	2.72448	6.20493e-21	2.35889e-19
GTF2A1	-0.776305	7.34938e-21	2.78636e-19
REEP1	3.31577	7.95193e-21	3.00661e-19
MTOR	0.535083	8.06792e-21	3.0422e-19
KIF21B	-0.801969	8.42297e-21	3.16749e-19
LOC101928841	0.798586	1.2247e-20	4.59311e-19
RAPGEF2	0.556969	1.30467e-20	4.8799e-19
STXBP5L	1.6118	1.70188e-20	6.34853e-19
LOC646762	1.01902	2.04914e-20	7.62346e-19
OPHN1	1.24498	2.28899e-20	8.49307e-19
ATF3	-0.837132	2.97912e-20	1.10219e-18
NTN1	-1.28246	2.98639e-20	1.10219e-18
UNKL	0.697231	3.0022e-20	1.1051e-18
PTPRJ	-0.811657	3.10408e-20	1.13958e-18
TRIB1	0.811346	3.38067e-20	1.23786e-18
MTCL1	0.762857	3.60317e-20	1.31586e-18
C11orf96	1.53604	3.82188e-20	1.39208e-18
CD9	0.962263	4.11195e-20	1.49383e-18
C10orf54	-1.22924	4.46234e-20	1.6169e-18
SNX29	0.671938	4.59419e-20	1.66035e-18
SLMAP	0.573415	4.67185e-20	1.68404e-18
LBR	-0.60612	5.12189e-20	1.8415e-18
IQGAP3	-0.607894	5.51825e-20	1.97889e-18
UXS1	0.610142	5.62817e-20	2.01312e-18
CDS2	0.75479	5.66307e-20	2.02041e-18
ZEB2	-0.46041	6.40645e-20	2.27978e-18
LOC728175	-0.79019	6.4567e-20	2.2918e-18
MICAL2	-1.39014	7.095e-20	2.51196e-18
TTC9	1.95269	7.2813e-20	2.57137e-18
VENTX	1.30926	9.21838e-20	3.2472e-18
GSAP	1.08464	9.50217e-20	3.33872e-18
ZNF93	-0.629409	9.75305e-20	3.41824e-18
YPEL2	0.767778	1.03099e-19	3.60431e-18
PRSS57	-1.49621	1.09695e-19	3.8253e-18
TFRC	-0.495556	1.15658e-19	4.02316e-18
SLC7A11	-1.51838	1.23942e-19	4.30056e-18
RAB30	-0.819685	1.388e-19	4.80412e-18
TNFRSF1B	-0.698736	1.63376e-19	5.64073e-18
PRPF39	-0.568905	1.68716e-19	5.81069e-18
TREML2	-1.48603	1.76199e-19	6.05342e-18
ATP6V0A1	2.57495	2.15129e-19	7.37267e-18
GDF11	0.740217	2.2366e-19	7.62996e-18
TARS	-0.522407	2.23733e-19	7.62996e-18
TENM1	5.06352	2.26699e-19	7.7122e-18
SKP2	-0.617857	2.32742e-19	7.89848e-18
CNST	0.532835	2.35262e-19	7.96456e-18
PLXDC2	-0.635176	2.4105e-19	8.14069e-18
SP7	-3.76749	2.53985e-19	8.55676e-18
SALL4	1.4405	2.58744e-19	8.69605e-18
SCN8A	2.38437	2.60468e-19	8.7329e-18
LGR4	0.913631	2.7017e-19	9.0364e-18
TTC28	0.607752	2.94225e-19	9.81739e-18
SLC48A1	1.4401	3.35117e-19	1.11551e-17
PXN	1.18248	3.3706e-19	1.1193e-17
BLOC1S2	0.823156	4.34974e-19	1.44101e-17
PARD3	0.585805	4.92763e-19	1.62858e-17
MPC1	0.705006	5.01762e-19	1.65439e-17
DOCK11	0.631671	6.87208e-19	2.26047e-17
PCK2	-0.776238	7.12818e-19	2.33919e-17
PHACTR4	0.539888	7.4113e-19	2.42637e-17
MCOLN2	0.633168	7.68865e-19	2.51126e-17
GLG1	0.514488	8.31445e-19	2.7093e-17
TSEN15	-0.774996	9.00386e-19	2.9271e-17
CDC25A	-0.580437	9.73019e-19	3.15585e-17
SLC8B1	1.02465	1.01532e-18	3.28539e-17
GPR65	-0.673646	1.07952e-18	3.48502e-17
CCNB1IP1	-0.643057	1.09838e-18	3.53771e-17
MARS	-0.525656	1.14662e-18	3.68453e-17
PGPEP1	1.09284	1.21873e-18	3.90725e-17
TMEM97	-0.696748	1.44268e-18	4.61458e-17
FAM49A	-0.778245	1.67596e-18	5.34845e-17
SBF2	0.806601	1.72005e-18	5.47172e-17
TOR4A	0.867645	1.72245e-18	5.47172e-17
HTR7	1.68847	1.80967e-18	5.7357e-17
PRKCH	0.944031	1.96833e-18	6.22439e-17
ZNF443	-0.58607	2.17331e-18	6.85701e-17
PSD3	0.574924	2.60635e-18	8.20471e-17
FHL5	7.3265	2.72951e-18	8.57302e-17
MCM10	-0.5231	2.81872e-18	8.83326e-17
TMEM131	0.538874	2.83584e-18	8.86693e-17
BANK1	-0.786753	2.94334e-18	9.18243e-17
ERCC6	0.780626	3.08731e-18	9.61003e-17
IRAK2	-0.869967	3.12406e-18	9.70271e-17
AEBP1	0.699055	3.46952e-18	1.07517e-16
CLVS1	1.86235	3.68128e-18	1.13825e-16
CSF1R	-0.91921	4.04924e-18	1.24925e-16
TNFRSF9	2.92486	4.18626e-18	1.28866e-16
HPS4	0.559776	4.45955e-18	1.36976e-16
RASSF2	-0.501299	4.5887e-18	1.40633e-16
TNFRSF13C	0.674756	4.63248e-18	1.41662e-16
MYO1G	0.78521	4.95178e-18	1.51094e-16
TTC38	-1.72652	5.00458e-18	1.52371e-16
GINS1	-0.739639	5.34108e-18	1.62262e-16
SIRPA	-1.17084	5.45322e-18	1.65307e-16
TGFB1	-0.699236	5.63535e-18	1.70457e-16
DAB2	-1.51599	5.75193e-18	1.73606e-16
LILRB4	2.16894	6.38387e-18	1.92262e-16
EGFEM1P	1.30001	8.03351e-18	2.41422e-16
CD84	1.6445	8.36739e-18	2.50913e-16
SGMS1	0.653043	8.88681e-18	2.65916e-16
PCNXL2	0.605084	9.07663e-18	2.71013e-16
STXBP1	0.848532	9.87513e-18	2.94224e-16
MID1	1.20884	1.14836e-17	3.41416e-16
TNRC6C-AS1	0.836411	1.15246e-17	3.41688e-16
NBPF15	1.9409	1.15419e-17	3.41688e-16
UCP2	0.529224	1.16889e-17	3.45306e-16
KCNA3	2.29051	1.17258e-17	3.45661e-16
OBSCN	1.13179	1.27254e-17	3.74336e-16
SOX5	2.35366	1.311e-17	3.84836e-16
IGLL5	-3.21958	1.3884e-17	4.06699e-16
KLF10	-0.706107	1.41576e-17	4.13843e-16
SEL1L3	0.870366	1.72012e-17	5.01754e-16
ARRDC5	2.01782	1.87391e-17	5.45472e-16
PEG10	0.660527	1.92122e-17	5.58077e-16
ZNF702P	2.32324	2.04874e-17	5.9388e-16
SLC9A7	0.658812	2.30308e-17	6.66218e-16
MYOM1	1.55913	2.48125e-17	7.16267e-16
LILRA1	-2.24782	2.54825e-17	7.34085e-16
CMTM8	1.76204	2.58426e-17	7.42921e-16
SLCO3A1	2.51671	2.64377e-17	7.58463e-16
ABCA3	1.02729	2.75935e-17	7.89992e-16
STAT5B	0.7182	2.77655e-17	7.93283e-16
INPP5F	0.647531	3.09058e-17	8.81195e-16
KCNJ2-AS1	2.5946	3.16972e-17	9.01913e-16
KCNMB3	1.43147	3.17745e-17	9.02266e-16
STX1A	0.749474	3.43185e-17	9.7252e-16
ANKRD44	0.820661	3.62936e-17	1.0264e-15
FOXP2	0.81337	3.71037e-17	1.04718e-15
MPP1	1.34959	3.74861e-17	1.05583e-15
AKAP13	0.486217	3.98566e-17	1.12033e-15
MMP14	-0.631648	4.32036e-17	1.21197e-15
UGT3A2	-0.733566	4.50722e-17	1.26184e-15
RASGRP1	0.601164	4.75051e-17	1.32728e-15
FAM214A	0.673532	4.81093e-17	1.34147e-15
UBE2H	0.648531	4.83754e-17	1.34619e-15
PARP12	0.721881	5.0975e-17	1.4157e-15
ZNF697	-0.8175	5.75552e-17	1.59527e-15
KCNN4	-1.19229	5.9709e-17	1.65167e-15
GPM6B	-0.92596	6.55582e-17	1.80988e-15
GMPR2	0.607395	7.48228e-17	2.06155e-15
TAOK3	0.539096	7.66709e-17	2.1083e-15
MCM4	-0.445533	8.04573e-17	2.20805e-15
DNMBP	0.611632	9.41988e-17	2.58008e-15
ZNF439	0.558361	1.09032e-16	2.98049e-15
ZFPM2	0.966686	1.11417e-16	3.03973e-15
STK38	0.650135	1.21951e-16	3.31741e-15
DNMT3B	-0.836096	1.22072e-16	3.31741e-15
MATN1-AS1	1.36866	1.24776e-16	3.38427e-15
TBC1D1	0.482988	1.25268e-16	3.391e-15
ENDOD1	0.661473	1.33657e-16	3.61106e-15
FAM78A	-0.717399	1.34484e-16	3.62639e-15
PRKCA	0.889334	1.3601e-16	3.6589e-15
PDP2	-0.53493	1.36216e-16	3.6589e-15
FMOD	1.78599	1.40291e-16	3.7611e-15
CYP2R1	-0.900558	1.7038e-16	4.55898e-15
ERGIC1	0.508022	1.86036e-16	4.96834e-15
ATG101	0.645239	2.26416e-16	6.03516e-15
LAMA3	0.716923	2.29243e-16	6.09882e-15
FNBP1	0.566717	2.51415e-16	6.67594e-15
RERE	0.448186	2.55709e-16	6.77703e-15
SIPA1L1	0.528037	3.14299e-16	8.31397e-15
NCKAP1L	0.60855	3.20753e-16	8.46861e-15
NR4A3	1.7981	3.33769e-16	8.79557e-15
LFNG	1.13208	3.34738e-16	8.80444e-15
DSTYK	0.689833	3.47317e-16	9.11805e-15
CBFA2T3	-1.23703	3.49671e-16	9.16257e-15
TICRR	-0.597249	3.53014e-16	9.23277e-15
MYO15B	0.781539	3.57538e-16	9.33355e-15
ARHGAP32	0.456923	3.5886e-16	9.35052e-15
GEN1	-0.766957	3.72733e-16	9.69385e-15
GOLGA2P5	0.666559	3.85443e-16	1.00057e-14
BMP2K	0.533562	4.28763e-16	1.1107e-14
CDC6	-0.49095	4.29464e-16	1.1107e-14
DNAJB2	0.75385	5.03004e-16	1.29848e-14
TBC1D10C	0.690732	5.84746e-16	1.5067e-14
DSC2	-1.6037	5.92845e-16	1.52273e-14
TCF7	-0.624773	5.93156e-16	1.52273e-14
CRIM1	0.517824	6.77579e-16	1.73625e-14
TRIM38	0.486594	6.90125e-16	1.76515e-14
FANCB	-0.669182	7.14855e-16	1.82504e-14
AUNIP	-0.567895	7.63543e-16	1.94578e-14
MAP2K3	0.705175	7.73048e-16	1.9664e-14
LRP5L	0.603519	7.91161e-16	2.0088e-14
IQGAP2	-0.604376	8.02998e-16	2.03514e-14
CDK1	-0.513881	8.246e-16	2.08609e-14
LINC01226	0.751749	8.46987e-16	2.13884e-14
DOCK1	0.709505	9.42315e-16	2.37525e-14
RHEBL1	-0.955801	9.52289e-16	2.39605e-14
DPYSL3	-0.686538	9.72365e-16	2.44214e-14
KLF9	-0.680893	1.01344e-15	2.54073e-14
ARID3B	-0.612421	1.24053e-15	3.10445e-14
DTL	-0.456133	1.26518e-15	3.16045e-14
INSIG1	-0.571868	1.28232e-15	3.19752e-14
ITPKB-IT1	1.62807	1.31917e-15	3.28354e-14
FIGNL1	-0.656247	1.40189e-15	3.48319e-14
UNC13D	0.84399	1.41831e-15	3.51771e-14
FLJ38122	3.21328	1.43446e-15	3.55145e-14
DAB2IP	0.554201	1.48877e-15	3.67936e-14
ARHGEF11	0.586922	1.70955e-15	4.2175e-14
ATP8A1	0.556503	1.86789e-15	4.59997e-14
SYNPO2	1.69215	1.95322e-15	4.8016e-14
PLD1	0.648063	2.06587e-15	5.06958e-14
SH3TC1	1.05424	2.23066e-15	5.46433e-14
QKI	-0.499291	2.41232e-15	5.89896e-14
PPP1R13B	1.30244	2.45168e-15	5.98468e-14
JADE2	0.554134	2.58197e-15	6.2917e-14
ZNF695	-0.719251	2.64347e-15	6.42296e-14
ZFHX3	0.552624	2.64507e-15	6.42296e-14
LCN6	0.88484	2.66909e-15	6.46999e-14
NEU3	0.527959	2.67504e-15	6.47313e-14
GRID2IP	0.829427	2.73943e-15	6.61744e-14
SPSB1	0.67773	2.83846e-15	6.84477e-14
SLC17A5	0.626273	3.00553e-15	7.23512e-14
DPF3	1.12062	3.09775e-15	7.44423e-14
DNM3OS	1.30173	3.13878e-15	7.52982e-14
LINC01225	0.738181	3.66607e-15	8.77964e-14
RPAIN	0.506892	3.72685e-15	8.90987e-14
SEMA3G	1.01344	4.0818e-15	9.7417e-14
EPRS	-0.50071	4.20185e-15	1.00022e-13
DGKI	0.8358	4.20531e-15	1.00022e-13
SHC3	1.96235	4.43532e-15	1.05312e-13
CORO1C	-0.465107	4.46716e-15	1.05888e-13
ID1	-0.771749	4.97736e-15	1.17781e-13
CSRNP1	0.750337	5.57523e-15	1.31704e-13
LGR6	-0.576921	5.73406e-15	1.35227e-13
SPTBN2	0.680627	6.28083e-15	1.47871e-13
MACF1	0.449185	6.36415e-15	1.49579e-13
BTBD9	0.631986	6.40609e-15	1.50311e-13
DGKD	0.484765	6.43064e-15	1.50633e-13
KIAA0101	-0.608475	6.73309e-15	1.57452e-13
RHOH	-0.74472	7.16911e-15	1.67367e-13
PTPRM	2.20061	7.73668e-15	1.80315e-13
RLTPR	0.877942	7.88434e-15	1.83449e-13
ATAD2	-0.530853	8.03607e-15	1.86668e-13
MELK	-0.572154	8.29441e-15	1.92347e-13
RAB6C-AS1	1.9971	8.4216e-15	1.94972e-13
IFI30	-0.964577	9.15055e-15	2.11496e-13
TET2	0.487473	1.04322e-14	2.40719e-13
DAAM1	-0.665414	1.05485e-14	2.43e-13
PARP1	0.441259	1.08687e-14	2.49962e-13
MCM6	-0.453024	1.11154e-14	2.55215e-13
MZB1	0.571952	1.25719e-14	2.88181e-13
LCN8	0.994962	1.29803e-14	2.97053e-13
CEP78	-0.67973	1.48769e-14	3.39897e-13
ZNF395	0.498621	1.51171e-14	3.44818e-13
CDYL2	0.770954	1.52052e-14	3.4626e-13
SLC7A5	-0.65147	1.5497e-14	3.52328e-13
GLIPR1	-0.902309	1.57219e-14	3.5686e-13
TGS1	-0.471952	1.59707e-14	3.61916e-13
GTSE1	-0.52215	1.64716e-14	3.72661e-13
LTK	0.857707	1.70313e-14	3.84698e-13
HOPX	1.71178	1.71956e-14	3.87779e-13
DDIAS	-0.614588	1.82145e-14	4.10091e-13
FLJ23867	0.896498	1.96605e-14	4.41932e-13
CDKN1A	-0.589202	2.01231e-14	4.51601e-13
CSPG4	-0.619354	2.22365e-14	4.98227e-13
TCL1A	0.536634	2.30717e-14	5.16109e-13
SLC37A1	0.852272	2.46619e-14	5.50796e-13
DLGAP4	0.537308	2.55769e-14	5.70316e-13
ULBP1	-1.10862	2.72409e-14	6.06448e-13
CLIP1	0.482744	2.84594e-14	6.32563e-13
GPR146	2.07849	3.14678e-14	6.98315e-13
NAV1	0.695537	3.21171e-14	7.11587e-13
HLA-DPA1	-0.727529	3.59957e-14	7.96254e-13
CACNB4	-0.53537	3.72496e-14	8.22683e-13
ARID1B	0.398663	3.79745e-14	8.37365e-13
APC2	1.31243	4.67221e-14	1.02862e-12
AKNA	-0.442621	5.00643e-14	1.10047e-12
RUNX1-IT1	0.72118	5.14711e-14	1.1296e-12
HTR1F	0.575872	5.46542e-14	1.19757e-12
CASZ1	0.693322	5.60364e-14	1.22593e-12
ZNF589	-0.587842	5.68323e-14	1.24139e-12
ADAM28	-0.750544	5.79567e-14	1.26396e-12
GAB1	0.567665	5.82589e-14	1.26857e-12
CAND1	-0.419219	5.93495e-14	1.2903e-12
PLK4	-0.463776	5.96645e-14	1.29512e-12
DNM1	-0.738569	6.15659e-14	1.33431e-12
GRK5	1.30115	6.32097e-14	1.36781e-12
MXRA7	0.720707	6.42737e-14	1.38867e-12
ARHGAP23	0.602623	6.48015e-14	1.3979e-12
URGCP	0.776864	6.60846e-14	1.42338e-12
KLHL24	0.510053	6.97884e-14	1.50083e-12
CARS	-0.540285	7.28156e-14	1.56351e-12
BRCA2	-0.485309	8.04442e-14	1.72465e-12
MTUS1	0.75501	8.67386e-14	1.85674e-12
FZD8	0.788273	9.18952e-14	1.9641e-12
SPRED1	-0.487381	9.21674e-14	1.9669e-12
IGSF11	2.9322	9.77267e-14	2.08234e-12
HMGCS1	-0.562546	9.97855e-14	2.12296e-12
RFTN1	0.463128	1.08614e-13	2.30727e-12
PFN2	1.19536	1.12164e-13	2.37903e-12
SIK2	0.483209	1.14837e-13	2.43203e-12
TLR7	-1.3763	1.2122e-13	2.56331e-12
PPP1R14C	-1.79336	1.23321e-13	2.60379e-12
CACNB1	0.657192	1.27577e-13	2.68956e-12
PIK3IP1	0.99832	1.36158e-13	2.86611e-12
PAG1	0.80223	1.37348e-13	2.8868e-12
LYN	0.430972	1.41714e-13	2.97408e-12
ERI1	-0.568307	1.42436e-13	2.98472e-12
TP53INP2	0.730432	1.44889e-13	3.03156e-12
MTL5	0.744204	1.47649e-13	3.08467e-12
BAG4	-0.536815	1.55249e-13	3.23858e-12
ENDOU	3.01868	1.69153e-13	3.52336e-12
RGS12	0.648773	1.76193e-13	3.66449e-12
SNX25	0.545817	1.82601e-13	3.79211e-12
KIAA1524	-0.544934	1.90664e-13	3.95365e-12
EMILIN2	-0.8054	1.94638e-13	4.03005e-12
TOM1	0.70683	2.02827e-13	4.18813e-12
ORC6	-0.498903	2.02875e-13	4.18813e-12
DHRS3	-1.34301	2.04207e-13	4.20938e-12
SH3PXD2A	-0.557714	2.09552e-13	4.31317e-12
LMO7	0.618044	2.19049e-13	4.502e-12
DNAH5	1.94173	2.20342e-13	4.52188e-12
C2orf69	-0.540019	2.23616e-13	4.58231e-12
UBA7	0.625971	2.25406e-13	4.6122e-12
RAP2A	-0.559415	2.284e-13	4.6666e-12
CLDN12	-0.866583	2.33712e-13	4.76813e-12
PDGFD	1.53455	2.49955e-13	5.09207e-12
SMG1P1	0.607713	2.55515e-13	5.19772e-12
HAUS6	-0.460641	2.70154e-13	5.48748e-12
LIMA1	-0.72992	2.73438e-13	5.5461e-12
BHLHE40	-1.57555	2.83175e-13	5.73522e-12
PLCG1	0.734283	2.86298e-13	5.79004e-12
SLC2A3	-0.555402	2.86897e-13	5.79373e-12
SPRY2	-0.582293	2.97236e-13	5.99383e-12
PECAM1	-1.23572	2.98181e-13	6.00418e-12
ATP13A3	-0.467712	3.11189e-13	6.25706e-12
MSMO1	-0.570137	3.20735e-13	6.4397e-12
TARSL2	0.571503	3.2686e-13	6.55321e-12
KDM4C	0.475058	3.47315e-13	6.95317e-12
SMC6	-0.531024	3.47808e-13	6.95317e-12
ADGRG5	-1.80898	3.53787e-13	7.05577e-12
SNX20	0.760695	3.53955e-13	7.05577e-12
FASTKD1	-0.674729	3.72125e-13	7.4019e-12
DLEU7-AS1	2.95259	3.72382e-13	7.4019e-12
PDE1B	0.591213	4.07093e-13	8.0803e-12
RBM24	3.52613	4.56278e-13	9.04367e-12
HMCES	0.659217	4.61291e-13	9.13002e-12
LOC101928100	-0.78169	4.67722e-13	9.24415e-12
ROBO3	1.16297	4.7654e-13	9.40508e-12
CAP2	1.58446	4.92079e-13	9.698e-12
FAM102A	1.17903	5.28627e-13	1.04036e-11
ATF7	0.467759	5.59667e-13	1.09989e-11
DCAF5	0.471657	5.85962e-13	1.14994e-11
TBX18	-0.574295	5.87338e-13	1.15102e-11
ALOX5AP	-1.3906	6.47195e-13	1.26654e-11
ABCC10	0.594037	6.67112e-13	1.30368e-11
FAM134A	0.492264	6.95431e-13	1.35711e-11
NARS	-0.465436	7.52027e-13	1.4655e-11
HCN2	3.43581	7.72275e-13	1.50286e-11
FAM171A1	0.815533	7.81056e-13	1.51782e-11
MAML3	0.546043	7.83719e-13	1.52087e-11
SPG20	-0.501179	8.36556e-13	1.62115e-11
STAG3L5P-PVRIG2P-PILRB	0.469127	8.54967e-13	1.65452e-11
TPCN2	0.637715	8.79444e-13	1.69953e-11
RIF1	-0.461954	8.83179e-13	1.70438e-11
CDR2	0.507558	9.12567e-13	1.75865e-11
DEPDC1B	-0.591762	9.66896e-13	1.86077e-11
FAM73B	0.537486	9.75478e-13	1.8747e-11
UBE2Q2P1	0.874923	9.90566e-13	1.90107e-11
NCAPG	-0.511789	9.99492e-13	1.91556e-11
PRDX1	0.441823	1.02642e-12	1.96445e-11
C18orf54	-0.679229	1.12612e-12	2.15231e-11
ZCCHC24	0.758766	1.18354e-12	2.25896e-11
SLC12A7	0.54946	1.19386e-12	2.27553e-11
GPR84	-3.72455	1.21449e-12	2.31169e-11
ZNF286A	-0.614267	1.30619e-12	2.48283e-11
KHNYN	0.483671	1.30948e-12	2.48517e-11
MAML2	-1.36589	1.31099e-12	2.48517e-11
RRM1	-0.429822	1.40177e-12	2.65364e-11
CEP104	0.609275	1.43784e-12	2.71823e-11
TACC1	-0.456461	1.46295e-12	2.75942e-11
BLM	-0.421828	1.4636e-12	2.75942e-11
NEK7	-0.611418	1.46857e-12	2.76505e-11
RND3	-0.887911	1.52289e-12	2.86345e-11
FADS3	1.07702	1.55342e-12	2.91691e-11
SPECC1	-0.684739	1.58711e-12	2.97615e-11
CMPK2	0.671624	1.59953e-12	2.9954e-11
MXD3	0.557124	1.63319e-12	3.05433e-11
CENPU	-0.467843	1.64781e-12	3.07753e-11
CAST	0.610851	1.6649e-12	3.10529e-11
NR4A2	0.755256	1.6698e-12	3.11026e-11
C1GALT1	-0.554156	1.73609e-12	3.2294e-11
SCCPDH	0.595989	1.74637e-12	3.24419e-11
ZBED8	-0.774026	1.77395e-12	3.29104e-11
SLC3A2	-0.566306	1.89776e-12	3.51603e-11
GPLD1	1.05049	1.99473e-12	3.69077e-11
MIR600HG	0.498716	2.03004e-12	3.74912e-11
APOBEC3D	0.687543	2.03165e-12	3.74912e-11
WIPI1	0.793953	2.03973e-12	3.75905e-11
PTPRZ1	6.83378	2.25482e-12	4.14994e-11
XRCC2	-0.603996	2.30813e-12	4.24245e-11
USP32	-0.506809	2.38764e-12	4.3828e-11
LINC01215	0.589311	2.48856e-12	4.56203e-11
CENPH	-0.57481	2.60267e-12	4.76494e-11
LPAR4	-1.79513	2.61314e-12	4.77783e-11
FAM69B	0.671772	2.90168e-12	5.29843e-11
FLNA	-0.585435	3.14974e-12	5.74384e-11
GLO1	-0.543436	3.30783e-12	6.02423e-11
TRIO	0.398542	3.33942e-12	6.07382e-11
LGR5	1.06576	3.62183e-12	6.57887e-11
MED13L	-0.363952	3.74038e-12	6.78536e-11
POGZ	0.364244	3.86069e-12	6.99448e-11
TOP3A	-0.431411	3.92018e-12	7.09303e-11
RHPN1	1.05155	4.02752e-12	7.27778e-11
PEAK1	0.491849	4.33869e-12	7.8299e-11
FBXO45	-0.455942	4.40395e-12	7.93737e-11
SOAT1	-0.541613	4.73285e-12	8.51913e-11
SCARF1	0.735929	5.27614e-12	9.48478e-11
SOX11	-0.475952	5.54477e-12	9.95483e-11
HELLS	-0.615924	5.64107e-12	1.01147e-10
EIF2S2	-0.464668	5.66046e-12	1.01364e-10
GUCY1A3	0.54339	5.91961e-12	1.05868e-10
NRG3	2.0301	5.97743e-12	1.06765e-10
ZNF436	0.678829	6.54135e-12	1.16585e-10
KCNK5	-0.628383	6.54395e-12	1.16585e-10
NOS1AP	1.28243	6.76919e-12	1.20443e-10
EXO1	-0.430808	6.81043e-12	1.21022e-10
LOC642852	0.975598	6.86864e-12	1.21901e-10
ASPH	-0.544309	7.08657e-12	1.25608e-10
SARS	-0.624822	7.26348e-12	1.2858e-10
OSBPL8	-0.452723	7.412e-12	1.31043e-10
RAPGEF5	1.57122	8.08949e-12	1.42839e-10
PBX3	0.408792	8.58021e-12	1.51312e-10
AZI2	-0.56046	8.59907e-12	1.51452e-10
TANGO6	0.503947	8.86196e-12	1.55885e-10
PJA2	0.444522	8.89174e-12	1.56212e-10
ZNF788	-0.421858	9.85364e-12	1.72892e-10
ACVR2B	-0.445657	1.00034e-11	1.75194e-10
NAA50	-0.413704	1.001e-11	1.75194e-10
CD180	0.849634	1.00376e-11	1.75456e-10
MYO1B	-0.466679	1.00842e-11	1.7605e-10
ZNF462	0.515024	1.09177e-11	1.90362e-10
CCDC14	-0.600539	1.15607e-11	2.01321e-10
CKAP4	0.661774	1.25861e-11	2.18903e-10
AGO2	0.417987	1.29214e-11	2.24455e-10
CAPN12	2.70803	1.33331e-11	2.31317e-10
CD40	-1.16926	1.34329e-11	2.32759e-10
NPM2	1.34323	1.36948e-11	2.37002e-10
EIF2AK3	0.437276	1.38567e-11	2.39506e-10
ATAD5	-0.450944	1.40727e-11	2.42938e-10
MID2	2.07159	1.41912e-11	2.4468e-10
DBNL	0.54019	1.44657e-11	2.49103e-10
ADAM23	2.60639	1.52486e-11	2.6226e-10
ATP2B1	-0.43161	1.55199e-11	2.66598e-10
AFF2	2.174	1.55715e-11	2.67154e-10
YARS	-0.396785	1.59624e-11	2.73523e-10
DUT	-0.466869	1.64935e-11	2.82277e-10
FSD2	1.76339	1.65354e-11	2.82646e-10
IQCB1	-0.45527	1.66896e-11	2.84931e-10
CHD1	-0.469836	1.68555e-11	2.8741e-10
FH	-0.463693	1.69249e-11	2.88241e-10
LAPTM5	0.452412	1.69626e-11	2.88531e-10
TAP1	0.575205	1.76913e-11	3.00558e-10
FAM110A	0.582305	1.77204e-11	3.00685e-10
HSF2	-0.46559	1.78402e-11	3.02349e-10
TGFBR2	0.400929	1.79553e-11	3.0393e-10
MCM3	-0.377185	1.8219e-11	3.08019e-10
USP1	-0.387752	1.86637e-11	3.15153e-10
NFATC2	0.523441	1.87392e-11	3.15752e-10
PRKCQ-AS1	-0.681366	1.87445e-11	3.15752e-10
TNFAIP8	-0.513114	1.91922e-11	3.22902e-10
ZNF821	0.65811	1.93101e-11	3.24494e-10
CBLB	0.431323	1.93484e-11	3.24744e-10
LINC00674	0.590197	1.93965e-11	3.24986e-10
THAP5	-0.577395	1.94095e-11	3.24986e-10
THBS4	-0.986148	2.02629e-11	3.38868e-10
FRRS1	-0.787264	2.03861e-11	3.40519e-10
CEP120	-0.487721	2.05911e-11	3.4353e-10
GNAI1	0.506208	2.23616e-11	3.72623e-10
BISPR	0.781947	2.25145e-11	3.7472e-10
CDC45	-0.511178	2.26614e-11	3.76716e-10
MYO18A	0.437666	2.27099e-11	3.7707e-10
SLF1	-0.535903	2.3255e-11	3.85661e-10
RALGPS1	0.649689	2.53412e-11	4.19758e-10
TJP2	0.519791	2.54971e-11	4.21839e-10
GNA11	0.688362	2.58693e-11	4.27489e-10
MINK1	0.567512	2.91269e-11	4.8075e-10
YPEL5	0.517101	2.95542e-11	4.87225e-10
ABAT	0.61806	3.04288e-11	5.01048e-10
MTMR1	0.462747	3.18596e-11	5.23988e-10
RAB39A	-1.1996	3.21056e-11	5.2741e-10
DYRK3	0.646975	3.2925e-11	5.40234e-10
PFKL	0.537792	3.43187e-11	5.62315e-10
CYFIP1	0.40002	3.43516e-11	5.62315e-10
C17orf53	-0.524886	3.45928e-11	5.65598e-10
SLC2A5	1.00839	3.55015e-11	5.79774e-10
FAM111A	-0.385658	3.69605e-11	6.02894e-10
DBR1	-0.58835	3.82018e-11	6.22411e-10
FANCL	-0.595112	3.85708e-11	6.27689e-10
DSTN	0.952579	3.90295e-11	6.34411e-10
GNA12	0.463698	4.2754e-11	6.94141e-10
ZAP70	0.499427	4.30323e-11	6.97845e-10
PICK1	0.858728	4.43808e-11	7.18877e-10
PCDHGC3	-0.467199	4.58054e-11	7.41089e-10
PTPRO	1.7219	4.64279e-11	7.50288e-10
AKR1A1	0.41844	5.00445e-11	8.07795e-10
ZNF74	-0.612649	5.13505e-11	8.27915e-10
ENG	0.534	5.25756e-11	8.46687e-10
LOC100130357	0.800427	5.32445e-11	8.56468e-10
NBPF14	1.36819	5.3634e-11	8.61736e-10
GJC1	-0.421223	5.53814e-11	8.88785e-10
GRPEL2	-0.437802	5.6292e-11	9.02358e-10
TTBK2	-0.425015	5.69395e-11	9.11687e-10
TOPORS	-0.401123	5.72694e-11	9.15915e-10
VAT1	-0.617426	5.77217e-11	9.22089e-10
GBGT1	0.568093	5.79907e-11	9.25324e-10
DGCR8	-0.406761	5.84246e-11	9.3118e-10
MASTL	-0.409113	5.89762e-11	9.38896e-10
FRY-AS1	2.15163	5.96857e-11	9.49106e-10
ARAP1	0.53298	6.23481e-11	9.9031e-10
ZNF440	0.512233	6.3004e-11	9.99587e-10
TMPO	-0.357244	6.39175e-11	1.01293e-09
ELMO1	0.47539	6.4826e-11	1.02615e-09
SLC7A1	-0.398431	6.9467e-11	1.09837e-09
RASGRP2	0.761824	6.99665e-11	1.10501e-09
GATA3	0.645742	7.19525e-11	1.13509e-09
KIR3DX1	1.74249	7.22479e-11	1.13803e-09
DFNA5	0.910982	7.23025e-11	1.13803e-09
MCMBP	-0.359844	7.5073e-11	1.1803e-09
LMNB1	-0.369894	7.83656e-11	1.23068e-09
ERO1B	-0.601327	7.89444e-11	1.23837e-09
MYBL1	0.917039	8.19964e-11	1.2848e-09
PWAR1	1.46287	8.33288e-11	1.3042e-09
PLEKHG1	2.20741	8.41085e-11	1.31493e-09
DHX32	0.636412	8.83244e-11	1.37929e-09
SCML1	-0.557385	9.03918e-11	1.40999e-09
ADAMTS9	0.673343	9.38346e-11	1.46205e-09
CAMK1D	0.483609	9.47785e-11	1.47511e-09
HDAC7	0.487416	9.73714e-11	1.51377e-09
VASN	1.08165	1.02273e-10	1.58821e-09
FOXF2	0.851663	1.02631e-10	1.59198e-09
PGBD2	0.474319	1.03189e-10	1.59886e-09
AHCYL1	-0.415756	1.03582e-10	1.60316e-09
KDM5B	3.20315	1.09437e-10	1.69189e-09
KLHL14	0.518399	1.11236e-10	1.71781e-09
DMD	1.38133	1.13026e-10	1.74351e-09
DNTT	2.86943	1.13265e-10	1.74526e-09
MAN1A1	0.669055	1.14274e-10	1.75886e-09
STEAP3	0.681955	1.16331e-10	1.78854e-09
CDC42EP3	-0.46973	1.22674e-10	1.88398e-09
VPS13B	0.418986	1.24207e-10	1.90542e-09
SPON2	1.06585	1.24886e-10	1.91372e-09
ECE1	0.805145	1.29656e-10	1.98463e-09
LRRK1	0.429593	1.31679e-10	2.01339e-09
UNC13B	-0.452973	1.40992e-10	2.15341e-09
RUNX3	0.895205	1.43403e-10	2.18785e-09
MFSD2A	-0.651074	1.4566e-10	2.21984e-09
ANKS1A	0.472428	1.49441e-10	2.27498e-09
BZRAP1-AS1	0.43788	1.54153e-10	2.34414e-09
SH2D3C	-0.499739	1.54403e-10	2.34537e-09
RAB8A	-0.526458	1.57332e-10	2.38726e-09
SLAIN1	0.487163	1.67331e-10	2.53622e-09
GLUD1P3	0.521693	1.67896e-10	2.542e-09
DST	0.457979	1.68519e-10	2.54867e-09
RECQL	-0.461118	1.70872e-10	2.58145e-09
DHCR24	-0.490006	1.77331e-10	2.67613e-09
C2orf44	-0.453751	1.81913e-10	2.74229e-09
TBC1D7	0.492237	1.83126e-10	2.75759e-09
KCTD12	-0.540396	1.91296e-10	2.8775e-09
LYL1	0.586378	2.00254e-10	3.009e-09
KLHL9	-0.40623	2.04418e-10	3.06825e-09
IVNS1ABP	-0.336256	2.10106e-10	3.15023e-09
RFC2	-0.451066	2.16143e-10	3.23444e-09
CLSPN	-0.445901	2.16187e-10	3.23444e-09
MYO1C	0.755596	2.19824e-10	3.28532e-09
ECH1	0.77562	2.24649e-10	3.35383e-09
EIF2S1	-0.394413	2.25241e-10	3.35906e-09
MZT1	-0.651731	2.28802e-10	3.40851e-09
C5orf30	-0.494361	2.39268e-10	3.56061e-09
ACAT2	-0.537829	2.50569e-10	3.72481e-09
ZNF652	0.372469	2.5587e-10	3.79954e-09
CCDC47	-0.413972	2.5988e-10	3.85497e-09
MDM2	0.382271	2.71947e-10	4.02968e-09
TDG	-0.464369	2.73648e-10	4.05058e-09
MAP2K1	-0.47519	2.9635e-10	4.38194e-09
EGR1	-1.05465	3.08979e-10	4.56384e-09
CTDSPL2	-0.374799	3.20089e-10	4.72293e-09
JDP2	-1.04276	3.39513e-10	5.00421e-09
ASNS	-0.532975	3.44424e-10	5.07043e-09
SPRY4	-0.623908	3.44734e-10	5.07043e-09
SIT1	-0.607425	3.53427e-10	5.1928e-09
LOC102723927	0.986781	3.64038e-10	5.34306e-09
CRYM-AS1	-0.861729	3.67799e-10	5.39257e-09
MPPED2	0.667872	3.7502e-10	5.49266e-09
SHTN1	0.562148	3.89769e-10	5.70268e-09
APH1B	0.591432	3.9039e-10	5.70286e-09
HLA-DMB	-0.804755	3.90601e-10	5.70286e-09
LINC00476	0.603292	3.93398e-10	5.73348e-09
KDELC2	-0.455379	3.93523e-10	5.73348e-09
MGAT4B	0.588003	3.99969e-10	5.8213e-09
ADGRE5	0.489494	4.03936e-10	5.8729e-09
CLPTM1L	0.381619	4.29223e-10	6.23404e-09
KIF21A	0.51901	4.30068e-10	6.23979e-09
ENTPD4	0.415818	4.35476e-10	6.31168e-09
LPIN1	0.332704	4.50302e-10	6.51977e-09
TG	1.60973	4.5651e-10	6.60279e-09
RAB3D	0.634583	4.76756e-10	6.88846e-09
SMC2	-0.482369	4.77466e-10	6.89156e-09
CPXM1	0.462385	4.81259e-10	6.93911e-09
TRIP13	-0.438706	4.87968e-10	7.02856e-09
CSGALNACT2	-0.482461	4.89025e-10	7.03649e-09
TIPIN	-0.528541	5.10461e-10	7.33735e-09
ABHD5	-0.564192	5.13565e-10	7.37435e-09
PDXK	0.492737	5.20208e-10	7.46204e-09
MYB	0.417309	5.21709e-10	7.47586e-09
MXI1	0.491325	5.31741e-10	7.61177e-09
TAF6L	-0.627664	5.40615e-10	7.73085e-09
SHMT2	-0.550652	5.49878e-10	7.85523e-09
MTHFD1	-0.459727	5.53691e-10	7.90159e-09
OSBP2	3.63199	5.7728e-10	8.22979e-09
RCBTB1	0.480494	5.82377e-10	8.29396e-09
NLK	0.421897	5.93174e-10	8.43908e-09
CAV1	1.87966	6.07239e-10	8.63036e-09
UQCC2	1.18765	6.10587e-10	8.66909e-09
INO80C	-0.592382	6.15351e-10	8.72782e-09
CCRL2	1.38145	6.16802e-10	8.7395e-09
ZDHHC23	1.16993	6.255e-10	8.85372e-09
ITPR1-AS1	1.61615	6.28365e-10	8.88524e-09
RNF44	0.426106	6.55285e-10	9.25649e-09
ADAM15	0.693837	6.57656e-10	9.2745e-09
PPM1K	-0.411615	6.57894e-10	9.2745e-09
INPP5A	0.48147	6.98695e-10	9.83972e-09
MTCP1	-0.704471	7.00123e-10	9.84986e-09
SLC26A9	-1.0703	7.40034e-10	1.04008e-08
QRSL1	0.514788	7.41348e-10	1.04088e-08
RIPK3	1.75788	7.78385e-10	1.09178e-08
LYST	-0.520001	8.03803e-10	1.1263e-08
TOX2	-1.13175	8.09017e-10	1.13246e-08
ATM	0.42462	8.21042e-10	1.14814e-08
LILRA2	0.570986	8.33942e-10	1.16501e-08
SLC1A5	-0.511841	8.39112e-10	1.17105e-08
PITPNM1	0.603972	8.46556e-10	1.18026e-08
COL9A2	-0.930888	8.83444e-10	1.23045e-08
RAB23	-0.729746	8.8655e-10	1.23355e-08
CLIP2	-0.4578	8.94388e-10	1.24321e-08
EFCAB5	0.903604	8.96063e-10	1.24429e-08
WEE1	-0.335706	9.13459e-10	1.26719e-08
ALDH1A1	1.58256	9.15006e-10	1.26807e-08
CLIC4	-0.383976	9.2096e-10	1.27505e-08
CCDC6	0.419275	9.43323e-10	1.30471e-08
ANXA1	-1.76554	9.48892e-10	1.31111e-08
HEXDC	0.663484	9.67654e-10	1.33571e-08
TADA2B	0.521145	9.82403e-10	1.35472e-08
STC2	-0.452743	9.86484e-10	1.359e-08
STAP1	1.74518	1.00123e-09	1.37795e-08
WT1-AS	0.572114	1.01582e-09	1.39666e-08
KIAA1217	1.10092	1.04281e-09	1.43235e-08
MBNL3	-0.456455	1.05548e-09	1.44832e-08
PPFIBP1	0.459952	1.05928e-09	1.4521e-08
NUDT16L1	0.681781	1.08149e-09	1.48109e-08
SLC7A2	-0.38525	1.11632e-09	1.52728e-08
SLAMF8	-1.73735	1.12915e-09	1.54332e-08
TRAF5	0.541069	1.13418e-09	1.54867e-08
CFAP47	1.62046	1.16387e-09	1.58765e-08
CTH	-0.815803	1.16974e-09	1.59409e-08
FSCN1	0.653673	1.19063e-09	1.62099e-08
BBS2	0.95569	1.23289e-09	1.67687e-08
PIGZ	1.15694	1.23588e-09	1.67931e-08
SHC4	1.75956	1.26734e-09	1.72037e-08
FGFR1OP2	-0.496878	1.28325e-09	1.74027e-08
PSMA6	0.426674	1.29727e-09	1.75757e-08
AP1B1	0.429478	1.33941e-09	1.81289e-08
SBK1	-0.89257	1.35782e-09	1.83603e-08
ERMP1	0.480968	1.38041e-09	1.86476e-08
TMEM231	1.24027	1.39002e-09	1.87592e-08
SETX	0.33248	1.3951e-09	1.88095e-08
SH2B3	-0.372288	1.42281e-09	1.91645e-08
HOXA2	0.917803	1.4592e-09	1.96357e-08
ITSN2	0.413765	1.52364e-09	2.04831e-08
MED12L	-0.349183	1.58152e-09	2.12406e-08
F2RL3	-0.686195	1.59296e-09	2.13736e-08
LINC00426	0.543604	1.59655e-09	2.14006e-08
NEBL	3.56531	1.59805e-09	2.14006e-08
PPARD	-0.494894	1.62639e-09	2.17592e-08
MGMT	0.692561	1.75039e-09	2.33957e-08
ACSS1	0.495851	1.76679e-09	2.35923e-08
NELL2	-1.48267	1.76853e-09	2.35928e-08
ADAMTS10	-0.676099	1.81305e-09	2.41636e-08
DCLRE1A	-0.609353	1.87054e-09	2.49059e-08
SHANK1	0.451563	1.87315e-09	2.49169e-08
R3HCC1L	0.359709	1.92366e-09	2.55642e-08
ACBD4	0.757194	1.95373e-09	2.59392e-08
ARHGEF12	0.37085	1.96351e-09	2.60441e-08
TACC2	1.38706	1.9918e-09	2.63942e-08
OSGEPL1	-0.638815	2.04049e-09	2.70136e-08
PCNX	0.346983	2.12948e-09	2.81651e-08
AMZ2	0.592292	2.16958e-09	2.86682e-08
FADS2	-0.424753	2.18304e-09	2.88186e-08
TLN2	0.537201	2.2019e-09	2.904e-08
MTAP	-0.461444	2.26046e-09	2.97842e-08
NUP205	-0.339384	2.2886e-09	3.01264e-08
LYPD1	3.15054	2.36703e-09	3.11293e-08
C4orf46	-0.444533	2.38015e-09	3.12723e-08
PRIM1	-0.497848	2.43411e-09	3.19511e-08
TFPI	2.89906	2.44914e-09	3.21181e-08
MVD	-0.697971	2.55827e-09	3.35177e-08
TNFSF10	1.04689	2.60506e-09	3.40986e-08
GYS1	0.516139	2.62372e-09	3.43106e-08
SLC4A4	1.69118	2.69556e-09	3.52169e-08
ALDH7A1	-0.599025	2.72747e-09	3.56004e-08
GPR18	0.83935	2.77064e-09	3.613e-08
RAB6C	1.36706	2.81942e-09	3.67317e-08
WHAMMP2	0.961803	2.82852e-09	3.68158e-08
NCAPG2	-0.527848	2.87905e-09	3.74384e-08
BTNL9	0.505356	2.89069e-09	3.75547e-08
VWA5B2	1.12231	2.93118e-09	3.80452e-08
MRPL33	-0.534621	2.9534e-09	3.82978e-08
RUSC1	-0.786041	2.96229e-09	3.83774e-08
TCF3	0.441402	2.99593e-09	3.8777e-08
C1orf112	-0.523035	3.00925e-09	3.89133e-08
COX20	-0.448119	3.03786e-09	3.92468e-08
LRMP	0.409687	3.08527e-09	3.98223e-08
ZNF486	-0.410451	3.14172e-09	4.05134e-08
SPDL1	-0.494053	3.14717e-09	4.05388e-08
IL6ST	0.404568	3.14952e-09	4.05388e-08
PDXDC1	0.394859	3.17049e-09	4.07709e-08
WDTC1	0.528758	3.20105e-09	4.11259e-08
CGN	0.78633	3.22467e-09	4.13912e-08
PYCR1	-0.646414	3.2553e-09	4.17458e-08
ORC1	-0.375271	3.26541e-09	4.18369e-08
NCOA3	0.371648	3.47212e-09	4.44445e-08
HMGA2	-0.358094	3.49795e-09	4.47339e-08
CSGALNACT1	2.4586	3.665e-09	4.68271e-08
TOM1L2	0.537902	3.68079e-09	4.69858e-08
B3GNT5	0.795413	3.75066e-09	4.78338e-08
ESRRG	2.23328	3.77024e-09	4.80395e-08
FAM120B	0.380024	3.78606e-09	4.8197e-08
INHBE	-1.33252	3.79651e-09	4.82857e-08
TTYH3	0.534693	3.82268e-09	4.85742e-08
GNG2	-0.521358	3.85575e-09	4.89498e-08
SCD	-0.493556	3.86398e-09	4.90095e-08
RFX8	-1.61757	3.88689e-09	4.92552e-08
SCN5A	-0.621164	3.91407e-09	4.95544e-08
EPB41L2	-0.410803	3.94883e-09	4.99275e-08
LOC100294145	-0.571267	3.95071e-09	4.99275e-08
SKA1	-0.445374	3.9895e-09	5.0372e-08
HINT1	-0.455909	4.03206e-09	5.08632e-08
HEXB	-0.502581	4.09341e-09	5.15903e-08
KIF15	-0.40461	4.10617e-09	5.17042e-08
POLQ	-0.389393	4.25869e-09	5.35764e-08
PVRL2	0.712871	4.30299e-09	5.40848e-08
FMNL2	-0.372441	4.31624e-09	5.42023e-08
CLDND1	-0.421116	4.3488e-09	5.45619e-08
GRAMD1B	0.491604	4.37129e-09	5.47947e-08
S100A4	0.553869	4.37702e-09	5.48171e-08
PM20D2	-0.390083	4.50048e-09	5.63126e-08
B3GALT1	-1.71177	4.55754e-09	5.69753e-08
WASF3	0.458225	4.59069e-09	5.73382e-08
IPO7	-0.340199	4.61518e-09	5.75924e-08
GPR180	-0.611947	4.68547e-09	5.84172e-08
MAMLD1	2.7443	4.79973e-09	5.97882e-08
VAV3	0.393847	4.86763e-09	6.05798e-08
NFYA	-0.337716	4.88359e-09	6.07241e-08
NCOA2	0.363665	4.98041e-09	6.18727e-08
KIAA2026	0.404238	5.00678e-09	6.21448e-08
NR3C1	-0.331098	5.17798e-09	6.42126e-08
KCNQ1OT1	0.395874	5.38321e-09	6.66981e-08
MFI2	0.486077	5.52999e-09	6.84558e-08
GORASP1	0.506686	5.61597e-09	6.94583e-08
HS3ST3B1	-0.676383	5.63487e-09	6.96301e-08
ATL3	-0.372228	5.64163e-09	6.96519e-08
PDE7A	-0.458558	5.69278e-09	7.02211e-08
OSM	-1.08069	5.72196e-09	7.05185e-08
ARHGEF40	-0.765862	5.84454e-09	7.19654e-08
NR4A1	1.09786	5.85332e-09	7.20098e-08
PALLD	-0.571023	5.97772e-09	7.34753e-08
FERMT1	0.466914	6.02924e-09	7.40431e-08
ALPK2	-2.86071	6.06231e-09	7.43836e-08
DENND5B	0.602291	6.1149e-09	7.49628e-08
GAS1	0.51874	6.33562e-09	7.76001e-08
ANP32E	-0.45177	6.5587e-09	8.02619e-08
ITGA2	-0.510717	6.70695e-09	8.2004e-08
KIF20B	-0.489862	6.74126e-09	8.2351e-08
DOK6	1.95722	7.19273e-09	8.77892e-08
FAM212B	0.465922	7.21354e-09	8.7966e-08
TMX1	-0.454923	7.24274e-09	8.82448e-08
MRE11A	-0.507777	7.42763e-09	9.04183e-08
PCDHGC5	-0.637159	7.48459e-09	9.1032e-08
KIFC3	0.684605	7.76138e-09	9.43161e-08
DDN	-0.588132	7.80493e-09	9.47625e-08
JADE1	-0.336981	7.8448e-09	9.51621e-08
FAM84B	-0.566645	7.85152e-09	9.51621e-08
BATF3	-1.09158	8.03683e-09	9.73232e-08
CERK	0.48182	8.08878e-09	9.78672e-08
NKD1	1.15277	8.09693e-09	9.78807e-08
FBXW4P1	0.568131	8.15447e-09	9.84906e-08
NAGK	-0.481735	8.20415e-09	9.90048e-08
SLC38A2	-0.331966	8.34635e-09	1.00634e-07
TP53INP1	1.22377	8.51754e-09	1.02609e-07
TBL1X	0.559497	8.79407e-09	1.05848e-07
SOWAHD	-0.594735	8.80527e-09	1.05892e-07
PDE8A	0.459436	9.13701e-09	1.09786e-07
NUB1	0.431275	9.14548e-09	1.09793e-07
PHACTR1	0.464274	9.26779e-09	1.11166e-07
EFEMP1	1.90251	9.34788e-09	1.1203e-07
HECTD4	0.339342	9.59724e-09	1.14919e-07
SLC38A1	-0.346138	9.64259e-09	1.15363e-07
IARS	-0.36832	9.73604e-09	1.16381e-07
RABEP2	0.461282	9.74536e-09	1.16392e-07
FAM109B	-0.688002	9.84709e-09	1.17506e-07
TTN	2.39204	9.93112e-09	1.18407e-07
COL27A1	0.493833	1.01437e-08	1.20839e-07
MAN2A2	0.395113	1.01712e-08	1.21063e-07
LOC102546299	0.703726	1.01867e-08	1.21143e-07
SPEF2	1.02967	1.02143e-08	1.21368e-07
PARP2	-0.422306	1.0253e-08	1.21724e-07
JARID2	-0.36982	1.06056e-08	1.25803e-07
ME3	0.553575	1.0773e-08	1.27679e-07
CFAP70	0.893306	1.07836e-08	1.27696e-07
PRKAB2	-0.437316	1.10133e-08	1.30305e-07
HERC1	0.350862	1.11823e-08	1.32192e-07
MIR17HG	-0.403908	1.11982e-08	1.32269e-07
PMS2P1	0.496863	1.12247e-08	1.32468e-07
EED	-0.485381	1.13068e-08	1.33325e-07
APOBEC3G	0.472914	1.14255e-08	1.3461e-07
ERRFI1	1.47785	1.17981e-08	1.38882e-07
TUBGCP5	-0.399023	1.20759e-08	1.42032e-07
ZCCHC8	-0.35558	1.23801e-08	1.45395e-07
FBXO48	-0.741948	1.23827e-08	1.45395e-07
ABTB1	0.583765	1.25316e-08	1.4702e-07
RALGAPA2	0.382429	1.26584e-08	1.48382e-07
ZNF525	-0.381963	1.26703e-08	1.48396e-07
NUDT22	0.500298	1.33751e-08	1.56519e-07
FCHO1	0.411832	1.34003e-08	1.56683e-07
PLAG1	0.547834	1.36587e-08	1.59569e-07
ARMC1	-0.464436	1.37036e-08	1.5996e-07
CPNE8	-0.454353	1.39336e-08	1.62509e-07
NFATC3	-0.294769	1.41473e-08	1.64862e-07
SLC22A5	2.18785	1.4219e-08	1.65559e-07
STIL	-0.353968	1.4331e-08	1.66724e-07
PLAU	1.11614	1.48531e-08	1.72653e-07
KLRC4	-0.506337	1.5544e-08	1.80534e-07
CHD3	0.358022	1.57184e-08	1.82407e-07
HIP1	0.488584	1.57469e-08	1.82586e-07
ZNF724P	-0.515861	1.57866e-08	1.82893e-07
BTBD3	-0.345393	1.60352e-08	1.85619e-07
GMNN	-0.38074	1.6082e-08	1.86006e-07
CECR1	0.434396	1.6169e-08	1.86857e-07
GFI1	0.399106	1.64419e-08	1.89853e-07
TMEM2	0.452472	1.66472e-08	1.92064e-07
NUP155	-0.314674	1.6727e-08	1.92825e-07
TCL6	0.650865	1.68722e-08	1.94338e-07
OGFRL1	-0.401122	1.71605e-08	1.97494e-07
C16orf62	0.666001	1.72604e-08	1.9848e-07
ZNF75D	0.462516	1.73176e-08	1.98973e-07
CLNS1A	-0.388578	1.76487e-08	2.02553e-07
UBN2	0.396634	1.76582e-08	2.02553e-07
ADARB2	0.752913	1.78137e-08	2.04168e-07
PVT1	0.439776	1.78335e-08	2.04226e-07
TRIM36	-0.581793	1.83093e-08	2.09503e-07
ZNF714	-0.476731	1.90574e-08	2.17884e-07
HSPB7	-0.439412	1.91039e-08	2.18236e-07
CBL	0.355792	1.92638e-08	2.19882e-07
NDRG1	0.370843	2.04078e-08	2.32749e-07
PANK3	-0.366787	2.06769e-08	2.35625e-07
EVL	0.458996	2.13108e-08	2.4265e-07
BCAS4	0.501719	2.13971e-08	2.43433e-07
NUDCD1	-0.456834	2.14939e-08	2.44335e-07
EME1	-0.448914	2.19236e-08	2.49016e-07
SHCBP1	-0.356571	2.19458e-08	2.49065e-07
TMEM100	1.71106	2.20071e-08	2.49557e-07
TRERF1	0.406109	2.20407e-08	2.49735e-07
ADRBK1	0.373877	2.20749e-08	2.49918e-07
NCAPH	-0.34874	2.23114e-08	2.5239e-07
KIF5C	1.2063	2.23412e-08	2.52523e-07
ZNF730	-0.489173	2.24647e-08	2.53622e-07
CNTNAP2	3.81005	2.24749e-08	2.53622e-07
C15orf39	-0.465002	2.30224e-08	2.5959e-07
RNF41	-0.378078	2.33302e-08	2.62847e-07
AFAP1L2	0.825859	2.3543e-08	2.6503e-07
FAM83D	-0.443243	2.36172e-08	2.6565e-07
CREBZF	-0.330749	2.46889e-08	2.77481e-07
UTRN	0.394185	2.49668e-08	2.80248e-07
SH3BP5-AS1	0.529335	2.49754e-08	2.80248e-07
PTCHD1-AS	-3.78482	2.50196e-08	2.80518e-07
VSIG10	0.499495	2.51898e-08	2.82199e-07
TPM2	-0.725689	2.5631e-08	2.86911e-07
GINS3	-0.37346	2.57787e-08	2.88128e-07
H2AFZ	-0.358678	2.57812e-08	2.88128e-07
SLC38A5	-0.562338	2.59389e-08	2.89658e-07
ERG	0.299623	2.6844e-08	2.99301e-07
TRIM35	-0.428687	2.68454e-08	2.99301e-07
BCL2L1	0.398937	2.79991e-08	3.11913e-07
MLH3	-0.395865	2.81086e-08	3.12882e-07
NUPL1	-0.445427	2.81615e-08	3.13221e-07
ADGRB2	1.30385	2.89783e-08	3.22048e-07
UNG	-0.454063	2.91862e-08	3.24099e-07
HEATR5B	0.366962	2.97179e-08	3.29741e-07
LTBP2	0.967463	3.01025e-08	3.33742e-07
NOC3L	-0.42152	3.01503e-08	3.34006e-07
LINC-PINT	-0.735473	3.05409e-08	3.38063e-07
TCTN1	-1.11481	3.06418e-08	3.38911e-07
DISP2	0.898715	3.07165e-08	3.39467e-07
MIR378I	0.630621	3.10935e-08	3.43361e-07
B3GALT4	0.765918	3.18295e-08	3.5121e-07
CREB3L2	0.34362	3.18609e-08	3.51278e-07
POLM	0.463794	3.2138e-08	3.54052e-07
ANK3	2.05832	3.31712e-08	3.65145e-07
VDR	0.59932	3.34123e-08	3.67508e-07
SMG1P3	0.410794	3.35357e-08	3.68575e-07
KIAA1462	1.80386	3.38216e-08	3.71424e-07
DOCK8	0.303008	3.46444e-08	3.8016e-07
UBE2D1	-0.607666	3.5058e-08	3.84395e-07
ZNF772	0.618091	3.58143e-08	3.92378e-07
POLD3	-0.415846	3.65311e-08	3.99917e-07
PTK7	-0.574423	3.76591e-08	4.1194e-07
SLC36A4	-0.440884	3.81399e-08	4.16873e-07
CCT6A	-0.371312	3.83545e-08	4.18888e-07
ASAP3	0.702939	3.88904e-08	4.24409e-07
DUSP10	-0.461776	3.93351e-08	4.28925e-07
HRH2	-0.645807	3.96636e-08	4.32168e-07
COL19A1	3.72189	4.06379e-08	4.42438e-07
LONRF2	-0.709099	4.13465e-08	4.49801e-07
CCDC162P	0.575332	4.22824e-08	4.59623e-07
CHEK1	-0.378151	4.25721e-08	4.62411e-07
SIRT1	-0.346001	4.28882e-08	4.65481e-07
JMJD6	0.403918	4.33906e-08	4.70566e-07
OSBPL7	0.589726	4.46305e-08	4.83637e-07
IL3RA	-1.63526	4.53012e-08	4.90522e-07
TRIP10	-0.564134	4.54643e-08	4.91692e-07
ZIC2	0.738017	4.548e-08	4.91692e-07
SERPINB10	3.339	4.56431e-08	4.93073e-07
ANGPTL6	0.691944	4.63557e-08	5.00382e-07
MSI2	0.416643	4.70529e-08	5.07144e-07
ANXA4	1.17847	4.7055e-08	5.07144e-07
ALCAM	0.422085	4.79962e-08	5.16888e-07
PNP	-0.368149	4.89302e-08	5.26539e-07
RAB37	0.963025	5.06907e-08	5.45062e-07
ST3GAL5	0.85199	5.09199e-08	5.47104e-07
GAS7	0.366072	5.16869e-08	5.54916e-07
MAD2L1	-0.433737	5.20257e-08	5.58123e-07
WBP1L	0.46601	5.25273e-08	5.62723e-07
IKBKE	0.51655	5.25354e-08	5.62723e-07
GPRC5C	0.608102	5.34054e-08	5.71602e-07
POLR1E	-0.421779	5.41171e-08	5.78774e-07
CLCN7	0.469427	5.42487e-08	5.79736e-07
EMC3-AS1	-0.418592	5.73582e-08	6.12496e-07
ARNTL	0.374374	5.76119e-08	6.14733e-07
GRAP2	-2.42697	5.7875e-08	6.17067e-07
CBX7	0.619334	5.8113e-08	6.1913e-07
IL9R	0.57503	5.84427e-08	6.2099e-07
POLE2	-0.525248	5.8447e-08	6.2099e-07
CASP2	-0.293389	5.84598e-08	6.2099e-07
AARS	-0.3661	5.8466e-08	6.2099e-07
RELT	0.402429	5.86075e-08	6.22017e-07
FOSL2	-0.422475	5.86805e-08	6.22177e-07
SPRED2	-0.341531	5.8712e-08	6.22177e-07
PTPN7	0.328608	5.98803e-08	6.34075e-07
HMGCR	-0.381704	6.0701e-08	6.42277e-07
NUSAP1	-0.368478	6.09031e-08	6.43925e-07
NUP43	-0.420561	6.09922e-08	6.44378e-07
SLC43A2	0.38394	6.12906e-08	6.47039e-07
FAM129C	-0.683483	6.16027e-08	6.49841e-07
MLLT11	-0.749593	6.3661e-08	6.71044e-07
SLC29A1	-0.446879	6.37975e-08	6.71974e-07
TXLNB	1.00613	6.47482e-08	6.81473e-07
FAM183B	1.71381	6.60853e-08	6.9502e-07
NIPBL-AS1	-0.395553	6.82813e-08	7.17572e-07
NFRKB	0.343947	6.86793e-08	7.21211e-07
DDHD2	-0.382154	6.88984e-08	7.22965e-07
HIATL1	-0.349882	6.95277e-08	7.2902e-07
DENND1A	0.405081	6.98233e-08	7.31567e-07
TMEM229B	0.722186	7.00608e-08	7.33504e-07
DONSON	-0.371014	7.06391e-08	7.39001e-07
MCF2L2	1.66373	7.08178e-08	7.40315e-07
FREM2	-0.740999	7.091e-08	7.40722e-07
TMEM63A	0.470784	7.19467e-08	7.50988e-07
NUP85	-0.431734	7.20615e-08	7.51622e-07
MTSS1	2.37024	7.24974e-08	7.55602e-07
GRIP1	-0.465856	7.36943e-08	7.67501e-07
SEPHS1	-0.349429	7.4939e-08	7.79881e-07
YPEL3	0.589948	7.57332e-08	7.87558e-07
HS6ST2	0.49788	7.72322e-08	8.02546e-07
BUB1B	-0.387663	7.80397e-08	8.10332e-07
MVK	-0.57518	7.84503e-08	8.13988e-07
ICMT	-0.388133	7.90393e-08	8.19488e-07
HTATSF1P2	0.602633	7.95839e-08	8.2452e-07
EPHA3	1.84652	8.10961e-08	8.39562e-07
FHOD1	0.432923	8.13489e-08	8.41553e-07
RFX3	0.444277	8.20695e-08	8.48376e-07
PHIP	-0.356339	8.48021e-08	8.75974e-07
PARP10	0.640002	8.51968e-08	8.79398e-07
IPO5	-0.341119	8.53105e-08	8.79919e-07
CEP55	-0.444199	8.5789e-08	8.84199e-07
PDK2	0.798556	8.58599e-08	8.84274e-07
GAB3	0.443039	8.66488e-08	8.9174e-07
HOMER2	0.438542	8.85154e-08	9.10276e-07
MYO5C	0.954275	8.96157e-08	9.20911e-07
ZBTB38	1.65759	9.12458e-08	9.3697e-07
DDHD1	0.424876	9.17005e-08	9.40816e-07
ZNF239	-0.390615	9.17556e-08	9.40816e-07
GYPE	0.885861	9.20397e-08	9.43034e-07
TIAF1	0.590311	9.25857e-08	9.47931e-07
LRRFIP2	-0.408841	9.30251e-08	9.51729e-07
HIPK3	-0.31157	9.36806e-08	9.57731e-07
PPAT	-0.361811	9.3817e-08	9.58421e-07
BTG3	-0.371168	9.41311e-08	9.60925e-07
GGA2	0.312535	9.44885e-08	9.63866e-07
RIN3	0.540545	9.53238e-08	9.71674e-07
CLCF1	1.34489	9.65219e-08	9.83166e-07
CREBBP	0.31989	9.69035e-08	9.86331e-07
OGFOD3	0.468604	9.85347e-08	1.0022e-06
RRBP1	0.377948	9.98301e-08	1.01464e-06
PHYH	0.710556	9.99213e-08	1.01482e-06
NBPF9	0.705264	1.01398e-07	1.02907e-06
CSTB	0.723512	1.02129e-07	1.03573e-06
LOC105747689	0.747392	1.03991e-07	1.05385e-06
MIEF2	0.829956	1.04822e-07	1.0615e-06
IQCE	0.804337	1.05507e-07	1.06765e-06
TUBE1	-0.700359	1.05884e-07	1.07069e-06
FRMD4A	-0.831766	1.07867e-07	1.08995e-06
EXOSC9	-0.370406	1.08778e-07	1.09766e-06
ANTXR1	-0.557457	1.08788e-07	1.09766e-06
KHDC1	-0.448544	1.11079e-07	1.11997e-06
NDC1	-0.343743	1.12547e-07	1.13395e-06
SERPINB9P1	2.06815	1.14107e-07	1.14859e-06
TXN	-0.537208	1.14165e-07	1.14859e-06
B3GALNT2	-0.360014	1.15249e-07	1.15809e-06
OSR2	1.00987	1.15276e-07	1.15809e-06
LANCL1	-0.407288	1.1672e-07	1.17135e-06
TSC22D1	-0.356001	1.16764e-07	1.17135e-06
TMC8	0.425063	1.16892e-07	1.17178e-06
GNG12	2.06163	1.1816e-07	1.18364e-06
ZNF174	0.509389	1.19071e-07	1.19191e-06
SPATA13	0.373805	1.22495e-07	1.22531e-06
LCN10	0.684652	1.23479e-07	1.23426e-06
NFKB2	0.525288	1.24116e-07	1.23973e-06
GALNT10	0.473584	1.24335e-07	1.24103e-06
ABR	-0.421503	1.27799e-07	1.27426e-06
PRSS12	-0.30923	1.27848e-07	1.27426e-06
RFC4	-0.384164	1.28158e-07	1.27591e-06
DUSP16	0.548953	1.28196e-07	1.27591e-06
USP34	0.32724	1.33062e-07	1.3233e-06
PLBD2	0.796714	1.33148e-07	1.3233e-06
LOC100506688	1.96431	1.33841e-07	1.32924e-06
TOB1	0.568166	1.34878e-07	1.33858e-06
ST3GAL1	-0.367632	1.37664e-07	1.36526e-06
ESAM	1.94019	1.40909e-07	1.39645e-06
SSR3	-0.368782	1.42839e-07	1.41457e-06
SDK1	2.03256	1.43107e-07	1.41621e-06
CDC7	-0.388259	1.45198e-07	1.43588e-06
TMEM25	1.0902	1.45352e-07	1.43638e-06
MT1X	0.757274	1.48335e-07	1.46482e-06
NUDT12	-0.535883	1.48511e-07	1.46552e-06
LIMD2	0.455911	1.49624e-07	1.47546e-06
COL24A1	-1.71158	1.50151e-07	1.4796e-06
CCPG1	-0.643593	1.51199e-07	1.48887e-06
APP	0.334767	1.52193e-07	1.49761e-06
RMRP	-0.50807	1.53234e-07	1.50679e-06
NUP88	0.337359	1.54579e-07	1.51893e-06
H2AFY	-0.316731	1.54746e-07	1.51951e-06
MYBL2	-0.341604	1.55828e-07	1.52905e-06
BPTF	0.342556	1.59291e-07	1.56193e-06
DNAJC9	-0.333791	1.60388e-07	1.57158e-06
ARID5A	0.405658	1.61365e-07	1.58004e-06
ZC3H12C	-0.347019	1.62857e-07	1.59352e-06
JAG1	1.71776	1.6344e-07	1.59811e-06
RRAGD	0.420558	1.63981e-07	1.60227e-06
ARPP19	-0.341024	1.64208e-07	1.60336e-06
BCL2	-0.333852	1.65736e-07	1.61652e-06
IL7R	0.365653	1.65788e-07	1.61652e-06
RFC1	-0.348634	1.65995e-07	1.61741e-06
FBXL17	0.503099	1.66884e-07	1.62493e-06
GREM1	-0.43289	1.67019e-07	1.62511e-06
RRN3P1	0.509689	1.69427e-07	1.64686e-06
FDFT1	-0.345353	1.69492e-07	1.64686e-06
LIN7C	-0.41497	1.70181e-07	1.6524e-06
EXT1	0.469673	1.70724e-07	1.65652e-06
ZNF567	-0.450261	1.72027e-07	1.668e-06
PIM2	0.495269	1.78337e-07	1.72798e-06
MOB1B	-0.403617	1.79061e-07	1.73379e-06
ZNF230	-0.607322	1.80165e-07	1.74326e-06
PINK1	0.823892	1.82615e-07	1.76574e-06
ZNF704	0.322534	1.83027e-07	1.7685e-06
HLA-E	0.335837	1.87007e-07	1.8057e-06
POMT1	1.18702	1.87597e-07	1.81014e-06
GPR63	-0.400757	1.96473e-07	1.89447e-06
PPHLN1	0.38833	2.00284e-07	1.92989e-06
MUM1	0.42482	2.01127e-07	1.93667e-06
SNX22	0.417338	2.05558e-07	1.97797e-06
KCTD9	-0.494333	2.058e-07	1.97892e-06
ADA	-0.487805	2.06214e-07	1.98153e-06
DNAJC1	0.52933	2.088e-07	2.005e-06
TMEM38A	0.885454	2.09008e-07	2.00561e-06
MTMR3	0.347845	2.12427e-07	2.03702e-06
HSPH1	-0.352927	2.14896e-07	2.05927e-06
F11R	0.351683	2.15699e-07	2.06554e-06
CHN2	0.80067	2.21597e-07	2.12056e-06
GAREM	0.550337	2.24653e-07	2.14833e-06
IL6R	-1.47408	2.26748e-07	2.16687e-06
HDAC2	-0.333979	2.32538e-07	2.22069e-06
TMEM38B	-0.594241	2.33287e-07	2.2263e-06
PAXBP1	-0.324704	2.33891e-07	2.23054e-06
SRGN	0.471169	2.35605e-07	2.24535e-06
BTN2A3P	-0.749608	2.43388e-07	2.31794e-06
ZNF529	-0.360887	2.47908e-07	2.35937e-06
SLC20A1	-0.282141	2.51398e-07	2.39094e-06
PPP3CA	-0.361126	2.52941e-07	2.40398e-06
ADD2	0.355949	2.58784e-07	2.45783e-06
PABPC4L	-0.578023	2.6136e-07	2.4806e-06
KIAA1656	1.12539	2.63153e-07	2.49591e-06
CTIF	0.929748	2.65642e-07	2.51781e-06
TBC1D4	0.331859	2.66729e-07	2.52639e-06
MTFR2	-0.433134	2.70655e-07	2.56183e-06
KALRN	-0.658638	2.71345e-07	2.56661e-06
SPN	-0.295637	2.72858e-07	2.57918e-06
HS3ST1	1.98733	2.76793e-07	2.6146e-06
FLI1	0.325298	2.81656e-07	2.65872e-06
LIMK2	-0.370276	2.81954e-07	2.65974e-06
SPG7	0.352112	2.83889e-07	2.67617e-06
SULT1A1	0.51139	2.84821e-07	2.68314e-06
ULK2	-0.635206	2.89662e-07	2.7269e-06
TTC19	-0.363245	2.90263e-07	2.73071e-06
RAB3GAP1	0.34442	2.97696e-07	2.79874e-06
CHRNA5	-0.54397	3.00537e-07	2.82354e-06
RAD1	-0.370628	3.0174e-07	2.83294e-06
LOC90768	-0.525545	3.04549e-07	2.85738e-06
CNKSR3	0.729219	3.10448e-07	2.91077e-06
DTD2	-0.667656	3.11268e-07	2.91648e-06
RAP2B	-0.371149	3.12061e-07	2.92195e-06
NUP35	-0.430446	3.1266e-07	2.92559e-06
RNF24	0.378085	3.13663e-07	2.93188e-06
TRPV2	0.555547	3.13754e-07	2.93188e-06
SMC4	-0.310867	3.20183e-07	2.98995e-06
MSRB3	3.25168	3.229e-07	3.0133e-06
BTG2	0.429791	3.23209e-07	3.01416e-06
ARHGDIB	0.323457	3.24165e-07	3.02105e-06
SOBP	0.655029	3.24451e-07	3.02169e-06
RHBDF2	0.479156	3.26671e-07	3.04033e-06
MORC3	-0.358917	3.27638e-07	3.0473e-06
PCNA	-0.299424	3.31214e-07	3.0785e-06
RAD18	-0.372441	3.31854e-07	3.08238e-06
RQCD1	-0.286427	3.36796e-07	3.1262e-06
NARF	0.35367	3.3829e-07	3.13798e-06
SCAND2P	0.404754	3.46052e-07	3.20777e-06
VAV1	0.379788	3.46275e-07	3.20777e-06
PIEZO1	0.435242	3.46787e-07	3.21037e-06
NRBP1	0.341572	3.54917e-07	3.28345e-06
SLC25A19	-0.451426	3.56703e-07	3.29778e-06
GEM	0.885916	3.5905e-07	3.31728e-06
SNRNP48	-0.398386	3.60226e-07	3.32593e-06
GAR1	-0.461737	3.61369e-07	3.33428e-06
EXOC3	0.375262	3.65699e-07	3.37199e-06
SKA2	-0.37398	3.73314e-07	3.43993e-06
SESN2	-0.693573	3.78971e-07	3.48975e-06
CENPO	-0.328449	3.80219e-07	3.49892e-06
TONSL	-0.418664	3.81097e-07	3.50468e-06
ERO1A	-0.384735	3.81413e-07	3.50527e-06
MCAM	-0.926993	3.82892e-07	3.51654e-06
LOXL2	0.664667	3.86819e-07	3.55026e-06
HIST1H2BE	-0.58885	3.90187e-07	3.57882e-06
NAP1L1	-0.412858	3.90559e-07	3.57987e-06
GRAMD1A	0.374126	3.91938e-07	3.59014e-06
C9orf163	0.745477	4.00429e-07	3.66551e-06
LTBP4	0.564469	4.02848e-07	3.68523e-06
RBL1	-0.34103	4.09585e-07	3.7444e-06
MEI1	0.915538	4.13387e-07	3.77667e-06
HIST1H2AK	-0.55578	4.25799e-07	3.88751e-06
BCR	0.391031	4.28904e-07	3.91329e-06
SVIL	0.361347	4.37438e-07	3.98854e-06
DCLRE1B	-0.413415	4.39461e-07	4.00436e-06
MNS1	-0.918203	4.42052e-07	4.02533e-06
PAXIP1	-0.314742	4.44695e-07	4.04548e-06
GMIP	0.384358	4.45054e-07	4.04548e-06
FEN1	-0.385172	4.45137e-07	4.04548e-06
HLA-DRA	-0.373238	4.49054e-07	4.07841e-06
TERT	0.426884	4.54139e-07	4.12191e-06
TMEM44	-0.450597	4.57306e-07	4.14795e-06
HAT1	-0.431215	4.61892e-07	4.18682e-06
IGFBP7	-0.497245	4.65961e-07	4.22095e-06
IKZF2	-0.410411	4.67392e-07	4.23116e-06
DERL3	-0.422023	4.69268e-07	4.24538e-06
HEATR5A	0.452527	4.77834e-07	4.32007e-06
ZNF215	-0.610977	4.81753e-07	4.35267e-06
ABHD4	-0.330849	4.87232e-07	4.39932e-06
ZHX3	0.400527	5.01982e-07	4.52956e-06
SLFN5	0.480199	5.05551e-07	4.55881e-06
TFAM	-0.354383	5.12377e-07	4.61737e-06
ACACB	0.437024	5.13984e-07	4.62885e-06
PCDHGC4	-0.53193	5.19038e-07	4.67134e-06
DHFR	-0.435255	5.20407e-07	4.68063e-06
CD48	0.437945	5.20841e-07	4.68152e-06
GOLT1B	-0.389883	5.21741e-07	4.68658e-06
2001-09-01	0.464392	5.28294e-07	4.74238e-06
NPIPB4	0.797066	5.39734e-07	4.84195e-06
PAOX	0.733785	5.43031e-07	4.86838e-06
AMIGO2	-1.34495	5.51402e-07	4.94025e-06
KBTBD11-OT1	1.66126	5.60101e-07	5.01496e-06
FNBP1L	-0.394405	5.62076e-07	5.0294e-06
CD6	1.9384	5.63441e-07	5.03838e-06
PPM1D	-0.345114	5.67183e-07	5.06858e-06
AASDHPPT	-0.398219	5.78514e-07	5.16652e-06
PSMB8	0.411067	5.80743e-07	5.1831e-06
C20orf194	0.307595	5.82718e-07	5.19739e-06
KIAA1161	0.505725	5.91607e-07	5.2733e-06
CDC42BPA	0.46788	5.96042e-07	5.30943e-06
ZFYVE16	-0.388505	5.97837e-07	5.32201e-06
GAS6-AS1	0.679775	5.98398e-07	5.3236e-06
KIF11	-0.343094	6.08782e-07	5.41166e-06
PLSCR1	-0.557577	6.09075e-07	5.41166e-06
PRICKLE2	0.386299	6.15065e-07	5.46131e-06
DEPDC1	-0.352143	6.15447e-07	5.46131e-06
PSIP1	-0.355099	6.17493e-07	5.47597e-06
ANGPT4	-1.90566	6.22712e-07	5.51874e-06
FMO4	0.898236	6.24191e-07	5.52832e-06
ATXN7L1	0.349337	6.45691e-07	5.7151e-06
HLA-DMA	-0.580393	6.48808e-07	5.73904e-06
RIMKLA	2.41391	6.53423e-07	5.77619e-06
ZNF680	-0.497659	6.69923e-07	5.91829e-06
TYMS	-0.298495	6.74222e-07	5.95249e-06
TMCO4	0.428877	6.78733e-07	5.98852e-06
RUNX2	0.284988	6.83497e-07	6.02673e-06
CSRNP2	-0.395045	6.89209e-07	6.07324e-06
NEDD1	-0.421453	6.95818e-07	6.1276e-06
SLIT2-IT1	2.35106	7.06687e-07	6.21938e-06
SSH2	0.307461	7.40361e-07	6.51162e-06
HAUS1	-0.526855	7.66251e-07	6.73114e-06
KPNB1	-0.258512	7.66287e-07	6.73114e-06
LGI2	0.663311	7.68094e-07	6.74275e-06
MSN	-0.331595	7.71186e-07	6.76563e-06
BARD1	-0.297323	7.87028e-07	6.90026e-06
SGTB	-0.454162	7.97042e-07	6.98365e-06
COLGALT1	-0.325593	8.13921e-07	7.12706e-06
MAT2B	-0.390525	8.19429e-07	7.17078e-06
TBC1D15	-0.41677	8.29382e-07	7.25332e-06
SGSH	1.11153	8.36124e-07	7.30768e-06
WDFY4	0.318566	8.41673e-07	7.35156e-06
CAPS	0.975247	8.55221e-07	7.46521e-06
HNRNPLL	-0.795686	8.57645e-07	7.48167e-06
GBP1	-0.456733	8.589e-07	7.48793e-06
NBEA	0.466585	8.65296e-07	7.53896e-06
ADAMTS18	0.400797	8.66993e-07	7.54902e-06
ITPRIPL1	-0.482358	8.71322e-07	7.57755e-06
FUT4	0.29112	8.71358e-07	7.57755e-06
RNF213	0.339251	8.72784e-07	7.58521e-06
MTBP	-0.392671	8.79431e-07	7.63821e-06
LOC100507472	0.938009	8.95778e-07	7.77533e-06
PIGW	-0.348894	8.96846e-07	7.77975e-06
CROCC	0.407124	9.00842e-07	7.80954e-06
ELMO2	-0.356468	9.04406e-07	7.83556e-06
POP1	-0.479868	9.12997e-07	7.90097e-06
MCU	0.373329	9.13091e-07	7.90097e-06
TMEM119	0.614182	9.15625e-07	7.91681e-06
SEC24C	0.349756	9.16061e-07	7.91681e-06
TCF7L2	0.398712	9.19919e-07	7.94523e-06
SLC15A4	-0.322567	9.28737e-07	8.0164e-06
GHDC	0.707729	9.39846e-07	8.10727e-06
MAP4K3	-0.354193	9.4251e-07	8.12521e-06
CCDC64	0.990745	9.44672e-07	8.13881e-06
PPA1	-0.475267	9.49231e-07	8.17302e-06
TRIM59	-0.338775	9.50525e-07	8.1791e-06
SLC6A16	1.2723	9.63264e-07	8.28359e-06
GRID1	-1.20552	9.6437e-07	8.28799e-06
MLYCD	0.423224	9.88043e-07	8.4862e-06
SLC25A32	-0.317658	9.89339e-07	8.49208e-06
ASH1L	0.294921	9.93028e-07	8.51849e-06
SAMD12	0.809224	9.99464e-07	8.56842e-06
CAMK2D	0.272647	1.00095e-06	8.57586e-06
PRR11	-0.515606	1.00575e-06	8.61171e-06
IL18BP	0.427646	1.01702e-06	8.70285e-06
ABI2	-0.488912	1.01915e-06	8.71568e-06
HEATR6	-0.363532	1.02968e-06	8.80031e-06
LAP3	-0.349234	1.0357e-06	8.84634e-06
MGAT4A	-0.439157	1.0421e-06	8.89561e-06
PCTP	0.439697	1.04697e-06	8.93163e-06
NETO2	-0.311503	1.0642e-06	9.07312e-06
MCM8	-0.440112	1.06933e-06	9.11128e-06
NUP107	-0.395345	1.0735e-06	9.14118e-06
CCNA2	-0.329857	1.07625e-06	9.15901e-06
TRAK1	0.284721	1.09307e-06	9.29648e-06
CENPI	-0.396115	1.11001e-06	9.43477e-06
MZF1	0.397494	1.13103e-06	9.60756e-06
IDH1	-0.393065	1.14007e-06	9.67842e-06
TNIK	1.04867	1.14604e-06	9.72315e-06
ZNF684	-0.615248	1.15384e-06	9.78337e-06
ADAT3	-0.651071	1.15592e-06	9.79501e-06
HIST1H2AL	-0.509957	1.16491e-06	9.86522e-06
STON1	0.527006	1.16585e-06	9.86718e-06
RNF152	-1.13878	1.16689e-06	9.86998e-06
AP5B1	0.366357	1.16787e-06	9.87224e-06
ROGDI	0.779241	1.17178e-06	9.89926e-06
FAM200B	-0.387358	1.18395e-06	9.99606e-06
EHBP1L1	0.364744	1.18561e-06	1.00039e-05
LIN9	-0.392493	1.20483e-06	1.016e-05
HDGFRP3	-0.370873	1.21131e-06	1.02084e-05
TWF2	-0.448141	1.21866e-06	1.02642e-05
SMC3	-0.375258	1.22281e-06	1.02874e-05
TCONS_00029157	0.884938	1.2229e-06	1.02874e-05
VASH2	-0.38957	1.24651e-06	1.04797e-05
FLJ42627	0.615985	1.24848e-06	1.04899e-05
CLASP2	0.306969	1.25021e-06	1.04981e-05
TMEM68	-0.474074	1.26462e-06	1.06128e-05
SLC46A3	0.587121	1.27224e-06	1.06702e-05
PRKD1	0.964008	1.29249e-06	1.08312e-05
HIPK2	0.33905	1.29298e-06	1.08312e-05
XRCC3	-0.381239	1.30068e-06	1.08891e-05
ZW10	-0.377357	1.31166e-06	1.09744e-05
PNRC1	0.357567	1.33454e-06	1.11591e-05
ACY3	1.40466	1.33758e-06	1.11753e-05
FNDC3B	0.375872	1.33808e-06	1.11753e-05
JAK2	0.410659	1.34442e-06	1.12215e-05
LRRCC1	-0.484253	1.3467e-06	1.12338e-05
WDR76	-0.314071	1.36073e-06	1.1344e-05
HEXIM1	-0.445965	1.37748e-06	1.14768e-05
KRTAP5-9	1.34258	1.38429e-06	1.15266e-05
MIR155HG	-0.457299	1.392e-06	1.15839e-05
IL1RAP	-0.601731	1.39712e-06	1.16196e-05
SNX33	0.680416	1.40787e-06	1.17019e-05
NIPAL3	0.51249	1.42581e-06	1.1844e-05
VEGFA	-0.662611	1.42747e-06	1.18508e-05
CATSPERG	0.92194	1.42945e-06	1.18601e-05
MB21D1	-0.360702	1.43376e-06	1.18888e-05
CALCOCO1	0.690207	1.44904e-06	1.20083e-05
DOCK5	0.395723	1.45172e-06	1.20234e-05
NUP153	-0.254138	1.45972e-06	1.20824e-05
CCDC149	0.553782	1.46141e-06	1.20893e-05
TMEM237	-0.420479	1.46784e-06	1.21338e-05
BHLHE41	-0.456481	1.46855e-06	1.21338e-05
ZNF664	-0.322246	1.50328e-06	1.24134e-05
TAF5	-0.379912	1.5104e-06	1.24648e-05
NEMP1	-0.370934	1.53558e-06	1.26651e-05
RNF34	-0.326525	1.53796e-06	1.26772e-05
C1orf226	1.11314	1.54681e-06	1.27427e-05
SYNGAP1	0.459292	1.55932e-06	1.28381e-05
NSUN5P2	-0.427182	1.56666e-06	1.28909e-05
JUN	-0.481028	1.57161e-06	1.2924e-05
PARP8	-0.432206	1.5792e-06	1.2973e-05
SH3YL1	0.337283	1.57943e-06	1.2973e-05
NADSYN1	0.355594	1.58134e-06	1.2981e-05
NOP58	-0.310413	1.58659e-06	1.30164e-05
FAR1	-0.469339	1.59994e-06	1.31154e-05
FERMT2	-0.643594	1.60054e-06	1.31154e-05
SBF2-AS1	0.892152	1.60475e-06	1.31421e-05
CCDC82	-0.504443	1.61709e-06	1.32354e-05
FAM53B	-0.351909	1.62108e-06	1.32602e-05
AASS	-0.415478	1.63148e-06	1.33375e-05
LIME1	0.522475	1.63721e-06	1.33764e-05
GREB1	0.652991	1.64609e-06	1.34411e-05
DUSP1	0.401214	1.64763e-06	1.34414e-05
VAMP1	0.318094	1.64806e-06	1.34414e-05
XPOT	-0.340345	1.65577e-06	1.34964e-05
VRK1	-0.530948	1.67389e-06	1.36361e-05
ANKH	0.399837	1.67588e-06	1.36424e-05
HIST1H4D	-0.445927	1.67736e-06	1.36424e-05
FBXO5	-0.346689	1.6776e-06	1.36424e-05
TRAF3IP1	0.668669	1.71752e-06	1.39589e-05
PANX1	-0.316874	1.72005e-06	1.39712e-05
SYTL2	0.860681	1.72216e-06	1.39803e-05
HIST1H2BL	-0.559083	1.73861e-06	1.41055e-05
GOLGA8B	0.507484	1.74439e-06	1.41442e-05
MANEA	-0.476781	1.75448e-06	1.42177e-05
GOPC	-0.326593	1.7648e-06	1.4293e-05
SUZ12	-0.288974	1.77777e-06	1.43897e-05
ZC2HC1B	1.34591	1.79678e-06	1.45351e-05
CHRNA7	1.70704	1.80378e-06	1.45832e-05
EDA	-0.834564	1.81942e-06	1.47011e-05
AMMECR1L	-0.319698	1.8314e-06	1.47894e-05
CEP128	-0.419164	1.83828e-06	1.48363e-05
GEMIN5	-0.34022	1.86046e-06	1.50066e-05
ICAM3	0.771145	1.86154e-06	1.50067e-05
ORAI2	0.321401	1.87947e-06	1.51424e-05
RNF138	-0.378398	1.90085e-06	1.53058e-05
TBXA2R	-0.904763	1.91276e-06	1.53928e-05
CISH	-0.694906	1.91523e-06	1.53976e-05
TMA16	-0.392206	1.91557e-06	1.53976e-05
LETM2	-0.497562	1.92537e-06	1.54675e-05
TROVE2	-0.341983	1.97984e-06	1.58958e-05
TCF4	0.763726	1.98785e-06	1.59509e-05
FBXO25	0.434161	1.99964e-06	1.60363e-05
ZDHHC6	-0.305923	2.04642e-06	1.6402e-05
PPP2R5B	1.17122	2.05986e-06	1.65002e-05
BCHE	-1.09041	2.06281e-06	1.65143e-05
SOGA1	0.333362	2.06893e-06	1.65538e-05
MAGOHB	-0.376314	2.07665e-06	1.6606e-05
USP31	0.322814	2.09188e-06	1.67182e-05
GALNT6	-0.381102	2.0967e-06	1.67471e-05
NRIP1	0.365857	2.09793e-06	1.67473e-05
MIR5190	2.28144	2.10116e-06	1.67635e-05
CCNJ	-0.318525	2.11422e-06	1.6858e-05
HAS3	0.88627	2.11876e-06	1.68846e-05
LPAR2	0.55778	2.1649e-06	1.72423e-05
LIMK1	0.366962	2.20915e-06	1.75757e-05
UVSSA	0.407508	2.20928e-06	1.75757e-05
AHCTF1	-0.280964	2.21405e-06	1.76036e-05
MAP3K4	0.325803	2.21683e-06	1.76156e-05
ACOX3	0.464788	2.23404e-06	1.77422e-05
HGSNAT	0.532332	2.25101e-06	1.78668e-05
KIF20A	-0.313849	2.26254e-06	1.79481e-05
NAA16	-0.377246	2.26809e-06	1.79819e-05
P2RX5	1.20777	2.32479e-06	1.84209e-05
HIST1H4L	-0.412128	2.32679e-06	1.84262e-05
AFTPH	0.334292	2.33793e-06	1.84976e-05
SULF2	1.42252	2.33845e-06	1.84976e-05
PPID	-0.418181	2.34141e-06	1.85104e-05
CDK2	-0.375761	2.34587e-06	1.85352e-05
MAPK8IP3	0.408652	2.36723e-06	1.86934e-05
2008-09-01	0.411166	2.37364e-06	1.87333e-05
BCL11A	-0.268007	2.41132e-06	1.90199e-05
RNF219	-0.350758	2.41608e-06	1.90466e-05
ATG10	-0.53354	2.42595e-06	1.91137e-05
C20orf197	-0.989363	2.43949e-06	1.92094e-05
SMIM13	-0.368816	2.44105e-06	1.92109e-05
DYNC1LI1	-0.328398	2.44776e-06	1.92527e-05
GDF6	1.48196	2.45039e-06	1.92625e-05
ITGA11	0.791155	2.45186e-06	1.92633e-05
KATNBL1	-0.497286	2.46951e-06	1.93909e-05
ADGRD1	0.616657	2.48731e-06	1.95197e-05
LOC389831	-0.628225	2.52203e-06	1.9781e-05
LOC388849	1.21205	2.53201e-06	1.98481e-05
EPHA1	-2.25491	2.54685e-06	1.99532e-05
CHAF1B	-0.339216	2.54948e-06	1.99625e-05
SYNPO2L	0.910976	2.56799e-06	2.00962e-05
ZBTB7B	0.586993	2.57677e-06	2.01536e-05
EXOSC8	-0.407814	2.61413e-06	2.04342e-05
POLA1	-0.35109	2.62431e-06	2.05023e-05
NET1	-0.330999	2.62615e-06	2.05052e-05
PRPS2	-0.384255	2.65859e-06	2.07468e-05
SH3PXD2B	-0.461406	2.67918e-06	2.08904e-05
CDK4	-0.314033	2.68135e-06	2.08904e-05
FLII	0.456104	2.68149e-06	2.08904e-05
TTC21A	0.780048	2.68802e-06	2.09295e-05
ZC3H12D	0.344284	2.69738e-06	2.09907e-05
DGKE	0.330243	2.75813e-06	2.14514e-05
TRIM62	0.498065	2.77516e-06	2.15718e-05
HPRT1	-0.439182	2.84994e-06	2.21407e-05
RBFOX2	0.343916	2.8775e-06	2.23423e-05
DCTPP1	-0.445038	2.88355e-06	2.23769e-05
SLC22A11	2.25085	2.89825e-06	2.24784e-05
ARHGAP11A	-0.347617	2.92633e-06	2.26835e-05
ZNF791	-0.318862	2.95082e-06	2.28606e-05
CCM2L	1.64378	2.96304e-06	2.29426e-05
WDHD1	-0.42446	2.98307e-06	2.30848e-05
FUCA1	0.534379	2.99753e-06	2.31838e-05
RXRA	0.631054	3.00309e-06	2.32139e-05
ADGRA3	0.346791	3.01467e-06	2.32905e-05
HK1	0.425602	3.0295e-06	2.3392e-05
TNRC6C	0.340918	3.04487e-06	2.34977e-05
ZNF252P-AS1	0.691839	3.05383e-06	2.35537e-05
DSN1	-0.416058	3.06737e-06	2.36451e-05
ESCO2	-0.323104	3.07865e-06	2.37189e-05
ACP6	0.810347	3.08397e-06	2.37468e-05
STOM	-0.325167	3.11114e-06	2.39427e-05
RNF11	-0.373672	3.12004e-06	2.39979e-05
SREBF1	-0.345883	3.13185e-06	2.40732e-05
UBE4B	0.303	3.13329e-06	2.40732e-05
HIST1H3C	-0.411333	3.13596e-06	2.40805e-05
NRP2	1.15224	3.16313e-06	2.42757e-05
RGS2	0.401613	3.23623e-06	2.4823e-05
RAB11FIP5	0.920895	3.24683e-06	2.48906e-05
KDSR	-0.32643	3.25047e-06	2.49047e-05
EVI2B	0.36648	3.25733e-06	2.49436e-05
PLCD3	-0.75621	3.26912e-06	2.50201e-05
GOLGA3	0.3016	3.27133e-06	2.50233e-05
NF1	-0.297768	3.27425e-06	2.50318e-05
RNF168	-0.286704	3.27919e-06	2.50558e-05
LINC00847	0.434807	3.31519e-06	2.5317e-05
ERAP1	-0.282624	3.31969e-06	2.53375e-05
PHLDB3	0.919588	3.34841e-06	2.55426e-05
RAD21	-0.270415	3.35402e-06	2.55714e-05
GPR157	1.2249	3.36433e-06	2.5636e-05
GMFB	-0.350878	3.36903e-06	2.56578e-05
STOX1	0.617066	3.40467e-06	2.5915e-05
CYSLTR1	-0.763503	3.41669e-06	2.59826e-05
SQLE	-0.374911	3.41909e-06	2.59826e-05
IFFO2	0.387315	3.41915e-06	2.59826e-05
SNX14	0.36837	3.42494e-06	2.60123e-05
ARL11	0.402608	3.44027e-06	2.61145e-05
CSE1L	-0.282679	3.54152e-06	2.68685e-05
LMBR1	0.30396	3.54564e-06	2.6885e-05
FAM96A	-0.423328	3.5571e-06	2.69453e-05
BBC3	-0.463095	3.55746e-06	2.69453e-05
ZNF518B	0.329048	3.57136e-06	2.70359e-05
POLD4	0.503117	3.60138e-06	2.72483e-05
ZNF100	-0.337914	3.63533e-06	2.74902e-05
RPS6KA3	-0.377264	3.65567e-06	2.7629e-05
CCDC113	1.47669	3.74759e-06	2.83083e-05
ANAPC11	-0.420407	3.76164e-06	2.83991e-05
NRGN	0.796158	3.77954e-06	2.85188e-05
MAP2K5	0.387245	3.78775e-06	2.85652e-05
BAG2	-0.382864	3.79584e-06	2.85972e-05
PRDM10	0.426635	3.79611e-06	2.85972e-05
ARMCX2	0.547939	3.82966e-06	2.88344e-05
FGD4	0.776006	3.83868e-06	2.88866e-05
ZNF587B	-0.305847	3.84637e-06	2.89288e-05
PELI3	0.525476	3.86595e-06	2.90604e-05
PIK3C2B	-0.284717	3.869e-06	2.90676e-05
ARMT1	-0.444234	3.87926e-06	2.9126e-05
TP53BP1	0.295218	3.88096e-06	2.9126e-05
DNAH1	0.362984	3.88974e-06	2.91762e-05
TSPAN14	0.304197	3.95607e-06	2.96577e-05
C12orf29	-0.411419	3.96523e-06	2.97104e-05
ZNF420	-0.368779	3.98689e-06	2.98566e-05
HIST1H2AC	-0.420873	3.99614e-06	2.99098e-05
MPZL3	0.585162	4.01877e-06	3.0063e-05
PTGES3	-0.264855	4.02583e-06	3.00997e-05
TIMP2	0.454086	4.06094e-06	3.03458e-05
CEACAM21	0.607508	4.06379e-06	3.03509e-05
ARL5B	-0.354471	4.08477e-06	3.04815e-05
KDM4B	0.353268	4.08567e-06	3.04815e-05
FIG4	0.479917	4.10588e-06	3.06159e-05
FAM102B	0.330027	4.11458e-06	3.06643e-05
LRRC37A4P	0.347445	4.15233e-06	3.09291e-05
APOBEC3F	0.422042	4.19492e-06	3.12296e-05
DTX4	0.349893	4.27445e-06	3.17895e-05
PTBP3	-0.346111	4.2747e-06	3.17895e-05
MBP	-0.314632	4.29394e-06	3.19156e-05
TPRG1L	0.447812	4.30341e-06	3.19675e-05
B4GALNT3	-0.735211	4.30553e-06	3.19675e-05
SIPA1L2	0.505148	4.31031e-06	3.19859e-05
C8orf82	0.49558	4.31404e-06	3.19966e-05
HMGN4	-0.418443	4.36706e-06	3.23726e-05
HMMR	-0.451859	4.38026e-06	3.24531e-05
LINC01341	1.04394	4.44075e-06	3.28838e-05
ITPKA	0.747031	4.44867e-06	3.29249e-05
DGAT2L6	-1.45407	4.46232e-06	3.30083e-05
COLCA1	2.21523	4.46785e-06	3.30317e-05
ZNF217	-0.268863	4.49086e-06	3.31842e-05
HOXA4	0.424047	4.51202e-06	3.33228e-05
DENND3	0.294497	4.56768e-06	3.3716e-05
NLRP1	0.307801	4.57649e-06	3.37631e-05
CENPJ	-0.420391	4.58042e-06	3.37633e-05
RILPL2	-0.430657	4.58136e-06	3.37633e-05
PTPRR	0.264908	4.64671e-06	3.42267e-05
NUP50	-0.258345	4.6557e-06	3.42748e-05
U2SURP	-0.326258	4.68714e-06	3.4488e-05
CLN6	-0.370602	4.70439e-06	3.45967e-05
TBC1D9B	0.351235	4.7265e-06	3.47409e-05
MEIS1	0.24367	4.74701e-06	3.48732e-05
NPIPB3	0.721299	4.7885e-06	3.51595e-05
FARSB	-0.360779	4.91622e-06	3.60782e-05
ZNF561	0.324097	4.92907e-06	3.61535e-05
LRP10	0.327734	4.9322e-06	3.61573e-05
SYNGR1	-0.432057	4.95599e-06	3.63126e-05
SEPN1	0.416752	4.96828e-06	3.63835e-05
DCUN1D4	-0.417864	4.98517e-06	3.64797e-05
HIST1H2BI	-0.490544	4.98665e-06	3.64797e-05
BOD1	-0.342802	5.04558e-06	3.68911e-05
NEDD9	0.460368	5.04877e-06	3.68911e-05
SNHG17	-0.293123	5.05086e-06	3.68911e-05
GLUD1	-0.277279	5.09919e-06	3.72247e-05
CHAF1A	-0.289872	5.1089e-06	3.72759e-05
2009-03-01	0.525644	5.11984e-06	3.73362e-05
MICA	-0.483434	5.1534e-06	3.75612e-05
ARSA	0.55197	5.19858e-06	3.78699e-05
AGAP1	0.396944	5.2012e-06	3.78699e-05
AACS	0.393536	5.20767e-06	3.78972e-05
SLC16A2	0.677675	5.27436e-06	3.83625e-05
PPFIA1	0.317845	5.28282e-06	3.8404e-05
SRSF10	-0.295337	5.29643e-06	3.84828e-05
ARVCF	0.522575	5.34392e-06	3.88076e-05
LIFR	0.826497	5.36547e-06	3.89437e-05
FGFRL1	-0.400269	5.37247e-06	3.89742e-05
HIST1H2AE	-0.417661	5.445e-06	3.94798e-05
FLOT1	0.387036	5.45432e-06	3.95268e-05
DENND4C	0.313731	5.48903e-06	3.97576e-05
TRAP1	0.380766	5.52055e-06	3.99651e-05
STX11	0.792835	5.53042e-06	4.00158e-05
CAND2	0.726903	5.55845e-06	4.01977e-05
NAT8L	0.468921	5.58717e-06	4.03843e-05
UBTD2	-0.389727	5.61929e-06	4.05954e-05
HMGN5	-0.578803	5.6658e-06	4.09102e-05
WASL	-0.344276	5.7162e-06	4.12527e-05
NUP54	-0.313365	5.72977e-06	4.13292e-05
CAPN1	0.461727	5.75268e-06	4.1473e-05
PRR5L	-1.11889	5.76856e-06	4.15659e-05
TFDP2	0.351988	5.77273e-06	4.15744e-05
GALNS	0.461934	5.87529e-06	4.22912e-05
PRC1	-0.265996	5.88297e-06	4.23246e-05
PCLO	0.707383	5.90356e-06	4.24507e-05
IGFBP2	-0.59601	5.93398e-06	4.26474e-05
CLSTN1	0.318052	6.04572e-06	4.34281e-05
TTF2	-0.336258	6.08362e-06	4.36777e-05
RORB	0.417002	6.09971e-06	4.3761e-05
ADAM1A	0.384752	6.10151e-06	4.3761e-05
FOXO3	-0.274864	6.1792e-06	4.42954e-05
HIST1H3H	-0.463472	6.18707e-06	4.4329e-05
CENPA	-0.399557	6.19249e-06	4.4345e-05
CYP51A1	-0.307361	6.29315e-06	4.50426e-05
DHRSX	0.581704	6.36964e-06	4.55667e-05
TSGA10	0.850631	6.37839e-06	4.56058e-05
POLR3K	-0.395536	6.49919e-06	4.64457e-05
RSAD1	-0.428552	6.5453e-06	4.67512e-05
PIF1	-0.436062	6.57535e-06	4.69213e-05
ZNF366	1.8803	6.57586e-06	4.69213e-05
CMTM3	-0.469051	6.65538e-06	4.74519e-05
ALG5	-0.351703	6.65704e-06	4.74519e-05
HIST1H2BG	-0.414916	6.67623e-06	4.75643e-05
LRRC40	-0.436821	6.75924e-06	4.81311e-05
CENPK	-0.485464	6.82648e-06	4.8585e-05
CECR2	-0.519618	6.95289e-06	4.94594e-05
VNN2	0.629468	7.04075e-06	5.00588e-05
CA2	-0.669934	7.08685e-06	5.03608e-05
FBXL7	0.44409	7.16252e-06	5.08725e-05
FAHD2CP	0.789989	7.4043e-06	5.2563e-05
MALT1	-0.338381	7.41372e-06	5.2603e-05
GADD45B	-0.334619	7.4216e-06	5.26321e-05
APEX2	-0.366778	7.43722e-06	5.2716e-05
ARFGEF1	0.322309	7.45417e-06	5.28092e-05
HEY2	1.021	7.49396e-06	5.30641e-05
HABP4	0.911495	7.53405e-06	5.33208e-05
TMEM33	-0.32106	7.61565e-06	5.38709e-05
DESI2	-0.284583	7.64693e-06	5.40648e-05
ZBED3	-0.429706	7.69223e-06	5.43537e-05
KCNMA1	0.426402	7.69562e-06	5.43537e-05
USP14	-0.396206	7.76429e-06	5.48109e-05
MSH2	-0.294154	7.77456e-06	5.48556e-05
CENPV	-0.389602	7.85684e-06	5.5408e-05
LTA4H	-0.504593	7.90371e-06	5.57103e-05
SEMA3F	0.513159	7.92967e-06	5.5865e-05
CYB5D1	-0.436538	8.03289e-06	5.65636e-05
XPC	0.300334	8.05517e-06	5.66918e-05
SOCS6	-0.309364	8.19792e-06	5.76673e-05
LOC101927027	-0.412427	8.20453e-06	5.76846e-05
HIST1H1D	-0.371715	8.35261e-06	5.86961e-05
SIGLEC10	0.972138	8.36802e-06	5.87747e-05
MAP7D1	-0.366599	8.37901e-06	5.88222e-05
APBB1IP	0.285188	8.41288e-06	5.90301e-05
ZCCHC4	-0.390349	8.42953e-06	5.91158e-05
PSMA2	-0.363641	8.43358e-06	5.91158e-05
UBE2E3	-0.361133	8.47295e-06	5.93619e-05
FAM111B	-0.273671	8.58776e-06	6.0136e-05
NHLRC4	0.608221	8.64531e-06	6.05084e-05
C21orf91	-0.325386	8.66242e-06	6.05977e-05
EBLN3	-0.280792	8.74072e-06	6.11148e-05
CHD6	0.245224	8.76093e-06	6.12253e-05
CHD4	0.276186	8.86097e-06	6.18933e-05
STAM	-0.355466	8.93866e-06	6.24047e-05
PPP1CB	-0.300922	9.03425e-06	6.30404e-05
VPREB1	0.414095	9.09077e-06	6.3403e-05
IMPG2	0.960039	9.12741e-06	6.36267e-05
KPNA2	-0.321861	9.29173e-06	6.47397e-05
ITIH4	0.672827	9.31478e-06	6.48405e-05
[truncated: 11,916 more rows]

## Sheet: GO terms
Enrichment: overlapping RUNX1 siRNA and KMT2A-AFF1 siRNA
PANTHER GO: Biological process enrichment test
Term	Fold_Enrichment	FDR
system development (GO:0048731)	1.38	1.29e-12
multicellular organism development (GO:0007275)	1.34	1.95e-12
anatomical structure development (GO:0048856)	1.31	2.19e-11
multicellular organismal process (GO:0032501)	1.27	3.88e-11
RNA processing (GO:0006396)	0.4	7.24e-11
developmental process (GO:0032502)	1.28	7.53e-11
animal organ development (GO:0048513)	1.44	7.62e-11
response to stimulus (GO:0050896)	1.21	8.25e-11
mRNA metabolic process (GO:0016071)	0.36	4.33e-10
cell differentiation (GO:0030154)	1.37	1.08e-09
cellular developmental process (GO:0048869)	1.35	5.14e-09
regulation of cellular process (GO:0050794)	1.14	6.44e-09
anatomical structure morphogenesis (GO:0009653)	1.49	9.52e-09
regulation of biological process (GO:0050789)	1.13	1.06e-08
cell communication (GO:0007154)	1.28	1.33e-08
signaling (GO:0023052)	1.28	1.5e-08
gene expression (GO:0010467)	0.64	1.74e-08
response to chemical (GO:0042221)	1.31	1.81e-08
signal transduction (GO:0007165)	1.29	1.82e-08
cellular response to stimulus (GO:0051716)	1.22	3.92e-08
mRNA processing (GO:0006397)	0.31	5.1e-08
locomotion (GO:0040011)	1.64	1.63e-07
RNA splicing (GO:0008380)	0.3	3.73e-07
biological regulation (GO:0065007)	1.1	1.18e-06
regulation of cell communication (GO:0010646)	1.29	1.24e-06
tissue development (GO:0009888)	1.52	1.34e-06
regulation of signaling (GO:0023051)	1.29	1.55e-06
negative regulation of cellular process (GO:0048523)	1.23	1.81e-06
RNA metabolic process (GO:0016070)	0.65	2.68e-06
regulation of cell migration (GO:0030334)	1.67	2.73e-06
immune system process (GO:0002376)	1.36	2.87e-06
response to organic substance (GO:0010033)	1.32	3.95e-06
movement of cell or subcellular component (GO:0006928)	1.51	4.35e-06
RNA splicing, via transesterification reactions (GO:0000375)	0.26	4.37e-06
regulation of signal transduction (GO:0009966)	1.3	4.47e-06
regulation of response to stimulus (GO:0048583)	1.25	5.38e-06
RNA splicing, via transesterification reactions with bulged adenosine as nucleophile (GO:0000377)	0.27	5.65e-06
response to external stimulus (GO:0009605)	1.39	5.68e-06
mRNA splicing, via spliceosome (GO:0000398)	0.27	5.81e-06
cellular response to chemical stimulus (GO:0070887)	1.32	6.29e-06
regulation of multicellular organismal process (GO:0051239)	1.31	6.63e-06
regulation of cell motility (GO:2000145)	1.62	8.34e-06
regulation of cellular component movement (GO:0051270)	1.58	1.1e-05
regulation of cell adhesion (GO:0030155)	1.72	1.39e-05
positive regulation of biological process (GO:0048518)	1.18	2.17e-05
cell surface receptor signaling pathway (GO:0007166)	1.36	2.2e-05
negative regulation of biological process (GO:0048519)	1.19	2.46e-05
regulation of locomotion (GO:0040012)	1.57	2.73e-05
taxis (GO:0042330)	1.9	2.96e-05
positive regulation of cellular process (GO:0048522)	1.19	3.14e-05
cell motility (GO:0048870)	1.6	3.37e-05
localization of cell (GO:0051674)	1.6	3.44e-05
chemotaxis (GO:0006935)	1.9	3.67e-05
cell development (GO:0048468)	1.44	4.1e-05
positive regulation of multicellular organismal process (GO:0051240)	1.41	4.58e-05
animal organ morphogenesis (GO:0009887)	1.61	4.97e-05
ribonucleoprotein complex biogenesis (GO:0022613)	0.42	6.61e-05
cell migration (GO:0016477)	1.62	6.97e-05
regulation of localization (GO:0032879)	1.3	6.98e-05
regulation of cell-cell adhesion (GO:0022407)	1.89	0.000115
anatomical structure formation involved in morphogenesis (GO:0048646)	1.59	0.000117
nervous system development (GO:0007399)	1.33	0.000133
cellular response to organic substance (GO:0071310)	1.32	0.000136
regulation of developmental process (GO:0050793)	1.3	0.000148
rRNA metabolic process (GO:0016072)	0.27	0.000148
ncRNA processing (GO:0034470)	0.4	0.000166
response to oxygen-containing compound (GO:1901700)	1.41	0.00019
cellular nitrogen compound metabolic process (GO:0034641)	0.8	0.000218
regulation of cellular component organization (GO:0051128)	1.28	0.000222
tube morphogenesis (GO:0035239)	1.65	0.000224
regulation of protein phosphorylation (GO:0001932)	1.41	0.000227
cell morphogenesis involved in differentiation (GO:0000904)	1.73	0.000244
regulation of multicellular organismal development (GO:2000026)	1.33	0.000244
immune system development (GO:0002520)	1.62	0.000314
nucleic acid metabolic process (GO:0090304)	0.75	0.000322
positive regulation of cell adhesion (GO:0045785)	1.83	0.000341
rRNA processing (GO:0006364)	0.28	0.000343
cellular response to oxygen-containing compound (GO:1901701)	1.5	0.000375
tube development (GO:0035295)	1.55	0.000389
positive regulation of cell population proliferation (GO:0008284)	1.54	0.000395
negative regulation of response to stimulus (GO:0048585)	1.36	0.000489
cell morphogenesis (GO:0000902)	1.6	0.000635
regulation of hydrolase activity (GO:0051336)	1.41	0.000674
regulation of intracellular signal transduction (GO:1902531)	1.33	0.000742
regulation of anatomical structure morphogenesis (GO:0022603)	1.45	0.000756
regulation of phosphorus metabolic process (GO:0051174)	1.33	0.000758
regulation of phosphate metabolic process (GO:0019220)	1.33	0.000767
regulation of biological quality (GO:0065008)	1.21	0.000788
immune response (GO:0006955)	1.38	0.000895
regulation of cell differentiation (GO:0045595)	1.33	0.00094
regulation of phosphorylation (GO:0042325)	1.35	0.000946
negative regulation of developmental process (GO:0051093)	1.5	0.000983
vasculature development (GO:0001944)	1.69	0.00103
regulation of leukocyte proliferation (GO:0070663)	2.14	0.00111
positive regulation of response to stimulus (GO:0048584)	1.29	0.00112
cellular component morphogenesis (GO:0032989)	1.54	0.00116
hemopoiesis (GO:0030097)	1.61	0.00132
cell projection morphogenesis (GO:0048858)	1.7	0.00146
nucleobase-containing compound metabolic process (GO:0006139)	0.79	0.00147
regulation of actin cytoskeleton organization (GO:0032956)	1.77	0.00148
blood vessel development (GO:0001568)	1.68	0.00152
regulation of cell population proliferation (GO:0042127)	1.35	0.00153
positive regulation of cell migration (GO:0030335)	1.67	0.00154
neuron projection morphogenesis (GO:0048812)	1.7	0.00155
regulation of cell activation (GO:0050865)	1.63	0.00156
positive regulation of mononuclear cell proliferation (GO:0032946)	2.47	0.00165
plasma membrane bounded cell projection morphogenesis (GO:0120039)	1.7	0.00167
regulation of mononuclear cell proliferation (GO:0032944)	2.13	0.00175
neurogenesis (GO:0022008)	1.34	0.00179
nuclear-transcribed mRNA catabolic process (GO:0000956)	0.3	0.00182
positive regulation of cellular component movement (GO:0051272)	1.63	0.00186
positive regulation of cell motility (GO:2000147)	1.65	0.0019
cardiovascular system development (GO:0072358)	1.65	0.00192
blood vessel morphogenesis (GO:0048514)	1.75	0.00198
positive regulation of leukocyte proliferation (GO:0070665)	2.41	0.00202
cell morphogenesis involved in neuron differentiation (GO:0048667)	1.73	0.00213
axonogenesis (GO:0007409)	1.8	0.00219
regulation of actin filament-based process (GO:0032970)	1.71	0.00219
positive regulation of developmental process (GO:0051094)	1.38	0.00228
regulation of lymphocyte proliferation (GO:0050670)	2.11	0.00229
positive regulation of lymphocyte proliferation (GO:0050671)	2.43	0.00231
circulatory system development (GO:0072359)	1.48	0.00231
regulation of actin filament bundle assembly (GO:0032231)	2.51	0.00236
protein-containing complex disassembly (GO:0032984)	0.33	0.00236
intracellular signal transduction (GO:0035556)	1.31	0.0024
positive regulation of protein phosphorylation (GO:0001934)	1.45	0.00241
generation of neurons (GO:0048699)	1.35	0.00257
positive regulation of hydrolase activity (GO:0051345)	1.48	0.00281
regulation of cytoskeleton organization (GO:0051493)	1.56	0.00288
biological adhesion (GO:0022610)	1.52	0.00297
ribosome biogenesis (GO:0042254)	0.43	0.00299
response to endogenous stimulus (GO:0009719)	1.36	0.00312
positive regulation of actin filament bundle assembly (GO:0032233)	2.94	0.00313
angiogenesis (GO:0001525)	1.83	0.00313
positive regulation of cell activation (GO:0050867)	1.79	0.00315
hematopoietic or lymphoid organ development (GO:0048534)	1.55	0.0032
positive regulation of locomotion (GO:0040017)	1.6	0.00346
regulation of actomyosin structure organization (GO:0110020)	2.44	0.00361
translation (GO:0006412)	0.49	0.00371
enzyme linked receptor protein signaling pathway (GO:0007167)	1.51	0.00372
mRNA catabolic process (GO:0006402)	0.36	0.00374
nuclear-transcribed mRNA catabolic process, nonsense-mediated decay (GO:0000184)	0.19	0.00376
peptide biosynthetic process (GO:0043043)	0.5	0.00384
axon development (GO:0061564)	1.73	0.00386
cell adhesion (GO:0007155)	1.51	0.00407
regulation of GTPase activity (GO:0043087)	1.59	0.00435
translational termination (GO:0006415)	0.12	0.00437
RNA catabolic process (GO:0006401)	0.39	0.00455
cytoskeleton organization (GO:0007010)	1.38	0.00492
positive regulation of cell differentiation (GO:0045597)	1.42	0.00503
cell part morphogenesis (GO:0032990)	1.62	0.00515
positive regulation of cell-cell adhesion (GO:0022409)	1.87	0.00518
leukocyte differentiation (GO:0002521)	1.74	0.00547
regulation of lymphocyte activation (GO:0051249)	1.65	0.00604
positive regulation of lymphocyte activation (GO:0051251)	1.83	0.00618
heterocycle metabolic process (GO:0046483)	0.82	0.00634
neuron differentiation (GO:0030182)	1.43	0.00679
regulation of leukocyte activation (GO:0002694)	1.59	0.00681
negative regulation of cellular component organization (GO:0051129)	1.45	0.00684
regulation of catalytic activity (GO:0050790)	1.24	0.00731
regulation of cell development (GO:0060284)	1.42	0.00741
negative regulation of signal transduction (GO:0009968)	1.34	0.00758
Unclassified (UNCLASSIFIED)	0.73	0.00789
positive regulation of phosphorylation (GO:0042327)	1.4	0.00794
biological_process (GO:0008150)	1.03	0.00794
regulation of actin filament organization (GO:0110053)	1.78	0.00796
regulation of molecular function (GO:0065009)	1.21	0.00797
mitochondrial translational termination (GO:0070126)	0.13	0.00797
lymphocyte activation (GO:0046649)	1.67	0.008
positive regulation of phosphate metabolic process (GO:0045937)	1.38	0.00832
positive regulation of phosphorus metabolic process (GO:0010562)	1.38	0.00837
cellular aromatic compound metabolic process (GO:0006725)	0.82	0.00854
regulation of organelle organization (GO:0033043)	1.31	0.00857
cellular process (GO:0009987)	1.05	0.00859
positive regulation of leukocyte activation (GO:0002696)	1.76	0.00906
cell activation (GO:0001775)	1.37	0.0092
positive regulation of metabolic process (GO:0009893)	1.18	0.00935
neuron projection guidance (GO:0097485)	1.87	0.00944
axon guidance (GO:0007411)	1.87	0.00949
transmembrane receptor protein tyrosine kinase signaling pathway (GO:0007169)	1.56	0.00961
positive regulation of signal transduction (GO:0009967)	1.29	0.00971
negative regulation of cell communication (GO:0010648)	1.32	0.0102
translational elongation (GO:0006414)	0.24	0.0102
mesenchyme development (GO:0060485)	2.06	0.0103
negative regulation of signaling (GO:0023057)	1.32	0.0103
mitochondrial translational elongation (GO:0070125)	0.13	0.0107
positive regulation of stress fiber assembly (GO:0051496)	2.89	0.0114
regulation of stress fiber assembly (GO:0051492)	2.37	0.0118
regulation of ossification (GO:0030278)	1.99	0.0118
regulation of protein modification process (GO:0031399)	1.26	0.0118
regulation of supramolecular fiber organization (GO:1902903)	1.62	0.0124
ribonucleoprotein complex subunit organization (GO:0071826)	0.36	0.0129
regulation of cellular component biogenesis (GO:0044087)	1.37	0.0133
positive regulation of macromolecule metabolic process (GO:0010604)	1.18	0.0133
positive regulation of cell communication (GO:0010647)	1.27	0.0142
response to bacterium (GO:0009617)	1.59	0.0144
positive regulation of signaling (GO:0023056)	1.27	0.0146
import into cell (GO:0098657)	1.54	0.0148
regulation of T cell activation (GO:0050863)	1.71	0.0151
cellular response to lipid (GO:0071396)	1.56	0.0153
ncRNA metabolic process (GO:0034660)	0.57	0.0154
translational initiation (GO:0006413)	0.29	0.0157
sensory organ development (GO:0007423)	1.58	0.0158
regulation of neurogenesis (GO:0050767)	1.42	0.0158
regulation of nervous system development (GO:0051960)	1.4	0.0171
response to wounding (GO:0009611)	1.54	0.0176
negative regulation of multicellular organismal process (GO:0051241)	1.35	0.0177
positive regulation of cellular metabolic process (GO:0031325)	1.18	0.0179
epithelium development (GO:0060429)	1.41	0.0183
wound healing (GO:0042060)	1.58	0.0193
mesenchymal cell differentiation (GO:0048762)	2.18	0.0198
negative regulation of cellular component movement (GO:0051271)	1.71	0.0199
inner ear development (GO:0048839)	2.02	0.0202
embryonic morphogenesis (GO:0048598)	1.54	0.0207
cellular response to endogenous stimulus (GO:0071495)	1.34	0.0208
peptide metabolic process (GO:0006518)	0.6	0.0212
negative regulation of response to external stimulus (GO:0032102)	1.68	0.0214
neuron development (GO:0048666)	1.42	0.0233
neuron projection development (GO:0031175)	1.46	0.0234
regulation of leukocyte cell-cell adhesion (GO:1903037)	1.71	0.0237
leukocyte activation (GO:0045321)	1.37	0.0247
regulation of response to external stimulus (GO:0032101)	1.35	0.0264
substrate-dependent cell migration (GO:0006929)	3.6	0.0268
cellular nitrogen compound catabolic process (GO:0044270)	0.56	0.0268
response to hormone (GO:0009725)	1.39	0.0269
regulation of cellular metabolic process (GO:0031323)	1.11	0.0277
ribonucleoprotein complex assembly (GO:0022618)	0.37	0.0278
negative regulation of cell differentiation (GO:0045596)	1.45	0.0282
negative regulation of cell adhesion (GO:0007162)	1.75	0.0283
positive regulation of T cell activation (GO:0050870)	1.86	0.0284
response to drug (GO:0042493)	1.37	0.0291
positive regulation of immune system process (GO:0002684)	1.36	0.0299
positive regulation of nitrogen compound metabolic process (GO:0051173)	1.17	0.0299
regulation of chemotaxis (GO:0050920)	1.87	0.0304
regulation of neuron differentiation (GO:0045664)	1.44	0.0316
positive regulation of leukocyte cell-cell adhesion (GO:1903039)	1.81	0.0321
positive regulation of cellular component biogenesis (GO:0044089)	1.48	0.0329
macromolecule metabolic process (GO:0043170)	0.9	0.033
negative regulation of cell-cell adhesion (GO:0022408)	1.95	0.0336
regulation of cell projection organization (GO:0031344)	1.42	0.0341
positive regulation of T cell proliferation (GO:0042102)	2.4	0.0342
regulation of T cell proliferation (GO:0042129)	2.04	0.037
positive regulation of epithelial cell proliferation (GO:0050679)	1.95	0.0373
embryonic organ morphogenesis (GO:0048562)	1.75	0.0374
gland development (GO:0048732)	1.59	0.0393
cotranslational protein targeting to membrane (GO:0006613)	0.23	0.04
tissue morphogenesis (GO:0048729)	1.51	0.0401
response to lipid (GO:0033993)	1.4	0.0401
negative regulation of cellular metabolic process (GO:0031324)	1.19	0.0401
heterocycle catabolic process (GO:0046700)	0.58	0.0414
regulation of immune system process (GO:0002682)	1.27	0.0415
lymphocyte differentiation (GO:0030098)	1.75	0.0425
system process (GO:0003008)	1.32	0.0426
developmental growth (GO:0048589)	1.58	0.0432
skeletal system morphogenesis (GO:0048705)	1.84	0.0436
regulation of transport (GO:0051049)	1.25	0.0448
regulation of primary metabolic process (GO:0080090)	1.11	0.0456
response to organonitrogen compound (GO:0010243)	1.34	0.0458
negative regulation of cell migration (GO:0030336)	1.71	0.0468
B cell activation (GO:0042113)	1.93	0.047
positive regulation of B cell proliferation (GO:0030890)	3	0.0471
inner ear morphogenesis (GO:0042472)	2.44	0.0478
negative regulation of cell projection organization (GO:0031345)	1.84	0.0481
amide biosynthetic process (GO:0043604)	0.63	0.0481
regulation of smooth muscle cell migration (GO:0014910)	2.53	0.0494
positive regulation of protein modification process (GO:0031401)	1.3	0.0509
SRP-dependent cotranslational protein targeting to membrane (GO:0006614)	0.24	0.051
regulation of metabolic process (GO:0019222)	1.1	0.0511
regulation of plasma membrane bounded cell projection organization (GO:0120035)	1.4	0.0523
negative regulation of locomotion (GO:0040013)	1.63	0.0524
muscle tissue development (GO:0060537)	1.71	0.0529
positive regulation of cytoskeleton organization (GO:0051495)	1.71	0.0531
regulation of small GTPase mediated signal transduction (GO:0051056)	1.58	0.0533
growth (GO:0040007)	1.57	0.0539
positive regulation of catalytic activity (GO:0043085)	1.26	0.0541
organic cyclic compound metabolic process (GO:1901360)	0.85	0.0542
positive regulation of B cell activation (GO:0050871)	2.3	0.0543
regulation of epithelial to mesenchymal transition (GO:0010717)	2.23	0.055
ear development (GO:0043583)	1.86	0.0556
digestive tract morphogenesis (GO:0048546)	3.34	0.0568
cellular response to vascular endothelial growth factor stimulus (GO:0035924)	2.83	0.0568
positive regulation of cellular component organization (GO:0051130)	1.28	0.0582
regulation of cell death (GO:0010941)	1.24	0.0637
regulation of osteoblast differentiation (GO:0045667)	2.11	0.0652
cellular response to molecule of bacterial origin (GO:0071219)	1.84	0.0652
cellular response to biotic stimulus (GO:0071216)	1.78	0.0668
negative regulation of nitrogen compound metabolic process (GO:0051172)	1.19	0.0674
negative regulation of cell motility (GO:2000146)	1.66	0.0705
response to nitrogen compound (GO:1901698)	1.31	0.0705
positive regulation of protein metabolic process (GO:0051247)	1.23	0.0715
response to stress (GO:0006950)	1.15	0.0728
stem cell development (GO:0048864)	2.46	0.0732
stem cell differentiation (GO:0048863)	2.02	0.0733
mesenchymal cell development (GO:0014031)	2.46	0.0734
striated muscle tissue development (GO:0014706)	1.69	0.0745
lipid modification (GO:0030258)	1.72	0.0765
chromosome condensation (GO:0030261)	2.83	0.0781
epithelial cell differentiation (GO:0030855)	1.5	0.0782
positive regulation of molecular function (GO:0044093)	1.22	0.0795
adaptive immune response (GO:0002250)	1.66	0.08
nucleobase-containing compound catabolic process (GO:0034655)	0.59	0.0818
actin cytoskeleton organization (GO:0030036)	1.45	0.0819
neural crest cell differentiation (GO:0014033)	2.41	0.0825
organic cyclic compound catabolic process (GO:1901361)	0.62	0.0831
urogenital system development (GO:0001655)	1.65	0.0852
skeletal system development (GO:0001501)	1.51	0.0853
renal system development (GO:0072001)	1.69	0.0885
regulation of response to stress (GO:0080134)	1.24	0.089
regulation of kinase activity (GO:0043549)	1.32	0.0899
metabolic process (GO:0008152)	0.93	0.0903
regulation of cell morphogenesis (GO:0022604)	1.44	0.0904
leukocyte migration (GO:0050900)	1.68	0.0908
B cell differentiation (GO:0030183)	2.06	0.0909
transcription elongation from RNA polymerase II promoter (GO:0006368)	0.17	0.0921
positive regulation of supramolecular fiber organization (GO:1902905)	1.7	0.0926
regulation of wound healing (GO:0061041)	2	0.0928
second-messenger-mediated signaling (GO:0019932)	1.7	0.0929
positive regulation of alpha-beta T cell proliferation (GO:0046641)	4.24	0.0931
cellular response to lipopolysaccharide (GO:0071222)	1.84	0.0932
ribosomal small subunit biogenesis (GO:0042274)	0.17	0.0933
supramolecular fiber organization (GO:0097435)	1.48	0.0942
ruffle organization (GO:0031529)	3.23	0.0944
localization (GO:0051179)	1.11	0.0944
regulation of mRNA processing (GO:0050684)	0.36	0.0944
lymphocyte activation involved in immune response (GO:0002285)	2.13	0.0945
ameboidal-type cell migration (GO:0001667)	1.87	0.0945
cellular response to hormone stimulus (GO:0032870)	1.42	0.0946
positive regulation of alpha-beta T cell activation (GO:0046635)	2.44	0.0947
regulation of protein kinase activity (GO:0045859)	1.34	0.0947
protein targeting to ER (GO:0045047)	0.31	0.095
regulation of anatomical structure size (GO:0090066)	1.45	0.0953
endoplasmic reticulum to Golgi vesicle-mediated transport (GO:0006888)	0.44	0.0961
aromatic compound catabolic process (GO:0019439)	0.61	0.0963
positive regulation of GTPase activity (GO:0043547)	1.48	0.0967
response to peptide (GO:1901652)	1.46	0.0969
regulation of MAPK cascade (GO:0043408)	1.38	0.0971
myeloid cell differentiation (GO:0030099)	1.65	0.0998
regulation of protein metabolic process (GO:0051246)	1.16	0.101
regulation of epithelial cell proliferation (GO:0050678)	1.6	0.102
cell fate commitment (GO:0045165)	1.79	0.103
negative regulation of cell death (GO:0060548)	1.3	0.103
regulation of cell morphogenesis involved in differentiation (GO:0010769)	1.56	0.109
neural crest cell migration (GO:0001755)	2.94	0.11
regulation of nitrogen compound metabolic process (GO:0051171)	1.1	0.11
mitochondrial gene expression (GO:0140053)	0.4	0.11
positive regulation of cellular protein metabolic process (GO:0032270)	1.23	0.112
nitrogen compound metabolic process (GO:0006807)	0.92	0.116
regulation of homotypic cell-cell adhesion (GO:0034110)	3.08	0.117
regulation of ERK1 and ERK2 cascade (GO:0070372)	1.65	0.119
negative regulation of protein phosphorylation (GO:0001933)	1.46	0.122
viral transcription (GO:0019083)	0.35	0.122
regulation of immune response (GO:0050776)	1.3	0.124
regulation of B cell activation (GO:0050864)	1.93	0.126
response to organic cyclic compound (GO:0014070)	1.33	0.127
regulation of cellular protein metabolic process (GO:0032268)	1.16	0.127
anion transmembrane transport (GO:0098656)	1.65	0.133
muscle organ development (GO:0007517)	1.63	0.136
neural crest cell development (GO:0014032)	2.37	0.137
positive regulation of protein localization to membrane (GO:1905477)	1.89	0.137
negative regulation of neuron differentiation (GO:0045665)	1.67	0.137
actin filament-based process (GO:0030029)	1.39	0.137
response to external biotic stimulus (GO:0043207)	1.29	0.137
positive regulation of immune response (GO:0050778)	1.36	0.138
embryo development (GO:0009790)	1.3	0.138
positive regulation of intracellular signal transduction (GO:1902533)	1.29	0.138
response to other organism (GO:0051707)	1.29	0.138
gland morphogenesis (GO:0022612)	2.1	0.139
central nervous system development (GO:0007417)	1.31	0.139
cellular metabolic process (GO:0044237)	0.93	0.139
regulation of cellular component size (GO:0032535)	1.47	0.14
negative regulation of phosphate metabolic process (GO:0045936)	1.38	0.14
plasma membrane bounded cell projection organization (GO:0120036)	1.27	0.14
head development (GO:0060322)	1.34	0.141
cellular protein complex disassembly (GO:0043624)	0.4	0.142
integrin-mediated signaling pathway (GO:0007229)	2.02	0.143
cell chemotaxis (GO:0060326)	1.91	0.143
morphogenesis of an epithelium (GO:0002009)	1.48	0.143
protein targeting to membrane (GO:0006612)	0.46	0.143
protein localization to endoplasmic reticulum (GO:0070972)	0.39	0.143
vascular endothelial growth factor receptor signaling pathway (GO:0048010)	2.18	0.145
regulation of RNA splicing (GO:0043484)	0.38	0.145
response to biotic stimulus (GO:0009607)	1.28	0.146
regulation of alpha-beta T cell proliferation (GO:0046640)	3.11	0.15
positive regulation of establishment of protein localization (GO:1904951)	1.43	0.151
mitochondrial translation (GO:0032543)	0.36	0.151
amino acid import across plasma membrane (GO:0089718)	4.11	0.154
T cell migration (GO:0072678)	3.33	0.156
positive regulation of transport (GO:0051050)	1.3	0.156
regulation of cell size (GO:0008361)	1.69	0.157
dendritic cell migration (GO:0036336)	3.64	0.158
sensory organ morphogenesis (GO:0090596)	1.67	0.158
regulation of steroid biosynthetic process (GO:0050810)	2.06	0.16
intrinsic apoptotic signaling pathway (GO:0097193)	1.72	0.16
negative regulation of phosphorus metabolic process (GO:0010563)	1.37	0.161
digestive system development (GO:0055123)	1.99	0.162
positive regulation of cell development (GO:0010720)	1.4	0.162
intrinsic apoptotic signaling pathway in response to DNA damage (GO:0008630)	2.11	0.163
response to oxygen levels (GO:0070482)	1.46	0.164
amino acid transmembrane transport (GO:0003333)	2.18	0.165
regulation of inflammatory response (GO:0050727)	1.56	0.165
inorganic anion transmembrane transport (GO:0098661)	2.18	0.166
cerebellar cortex development (GO:0021695)	2.49	0.167
B cell activation involved in immune response (GO:0002312)	2.49	0.167
vitamin metabolic process (GO:0006766)	1.91	0.167
negative regulation of inflammatory response (GO:0050728)	1.91	0.167
response to peptide hormone (GO:0043434)	1.47	0.167
response to growth factor (GO:0070848)	1.4	0.167
regulation of B cell proliferation (GO:0030888)	2.29	0.168
amino acid transport (GO:0006865)	1.91	0.168
synapse organization (GO:0050808)	1.62	0.168
response to lipopolysaccharide (GO:0032496)	1.58	0.168
cellular response to organonitrogen compound (GO:0071417)	1.4	0.168
regulation of growth (GO:0040008)	1.35	0.168
cellular component disassembly (GO:0022411)	0.61	0.169
cell projection organization (GO:0030030)	1.26	0.171
chloride transmembrane transport (GO:1902476)	2.34	0.172
epithelial tube morphogenesis (GO:0060562)	1.54	0.174
glycosaminoglycan biosynthetic process (GO:0006024)	2	0.176
cell recognition (GO:0008037)	1.93	0.176
Golgi vesicle budding (GO:0048194)	0.24	0.176
embryonic organ development (GO:0048568)	1.47	0.177
regulation of response to wounding (GO:1903034)	1.79	0.182
response to insulin (GO:0032868)	1.6	0.186
regulation of programmed cell death (GO:0043067)	1.21	0.188
response to vitamin A (GO:0033189)	4.4	0.191
positive regulation of osteoblast differentiation (GO:0045669)	2.45	0.192
negative regulation of ossification (GO:0030279)	2.19	0.192
positive regulation of T cell differentiation (GO:0045582)	2.06	0.192
kidney development (GO:0001822)	1.63	0.192
positive regulation of ossification (GO:0045778)	2.12	0.193
carboxylic acid metabolic process (GO:0019752)	1.3	0.193
aminoglycan biosynthetic process (GO:0006023)	1.99	0.194
myeloid leukocyte differentiation (GO:0002573)	1.86	0.195
cellular macromolecule catabolic process (GO:0044265)	0.76	0.195
regulation of Ras protein signal transduction (GO:0046578)	1.63	0.196
regulation of apoptotic process (GO:0042981)	1.21	0.196
regulation of lipid metabolic process (GO:0019216)	1.44	0.197
cellular response to growth factor stimulus (GO:0071363)	1.4	0.197
regulation of neuron projection development (GO:0010975)	1.39	0.197
oxoacid metabolic process (GO:0043436)	1.28	0.197
regulation of vasculature development (GO:1901342)	1.54	0.2
viral gene expression (GO:0019080)	0.43	0.201
cell junction organization (GO:0034330)	1.66	0.203
muscle structure development (GO:0061061)	1.44	0.204
negative regulation of biosynthetic process (GO:0009890)	1.2	0.205
organic acid metabolic process (GO:0006082)	1.28	0.207
response to abiotic stimulus (GO:0009628)	1.25	0.21
positive regulation of leukocyte differentiation (GO:1902107)	1.75	0.213
mitotic cell cycle process (GO:1903047)	1.3	0.214
negative regulation of cellular biosynthetic process (GO:0031327)	1.2	0.215
mannosylation (GO:0097502)	< 0.01	0.216
positive regulation of smooth muscle cell migration (GO:0014911)	2.63	0.216
regulation of leukocyte migration (GO:0002685)	1.67	0.216
DNA packaging (GO:0006323)	1.67	0.217
ear morphogenesis (GO:0042471)	1.97	0.221
embryonic skeletal system development (GO:0048706)	1.91	0.221
cytoplasmic translation (GO:0002181)	0.25	0.222
aerobic respiration (GO:0009060)	0.25	0.222
regulation of transferase activity (GO:0051338)	1.25	0.223
negative regulation of cell population proliferation (GO:0008285)	1.34	0.226
mitotic cell cycle (GO:0000278)	1.28	0.232
positive regulation of protein kinase activity (GO:0045860)	1.37	0.233
response to molecule of bacterial origin (GO:0002237)	1.53	0.234
neutral amino acid transport (GO:0015804)	2.83	0.238
primary metabolic process (GO:0044238)	0.93	0.238
regulation of interleukin-6 production (GO:0032675)	1.84	0.242
positive regulation of organelle organization (GO:0010638)	1.31	0.242
regulation of protein localization (GO:0032880)	1.25	0.242
cellular nitrogen compound biosynthetic process (GO:0044271)	0.83	0.242
semaphorin-plexin signaling pathway (GO:0071526)	2.54	0.244
regulation of cardiac muscle cell proliferation (GO:0060043)	2.54	0.245
intracellular transport (GO:0046907)	0.82	0.245
acid secretion (GO:0046717)	2.26	0.246
positive regulation of animal organ morphogenesis (GO:0110110)	2.17	0.246
connective tissue development (GO:0061448)	1.66	0.246
kidney epithelium development (GO:0072073)	1.94	0.251
glycosaminoglycan metabolic process (GO:0030203)	1.77	0.251
cerebellum development (GO:0021549)	1.94	0.252
hindbrain development (GO:0030902)	1.77	0.252
negative regulation of transcription, DNA-templated (GO:0045892)	1.22	0.257
response to decreased oxygen levels (GO:0036293)	1.43	0.258
calcium ion transport into cytosol (GO:0060402)	2.12	0.268
synaptic signaling (GO:0099536)	1.49	0.268
RNA modification (GO:0009451)	0.47	0.268
cell population proliferation (GO:0008283)	1.38	0.271
cell-cell signaling (GO:0007267)	1.27	0.271
regulation of steroid metabolic process (GO:0019218)	1.84	0.272
immune response-activating signal transduction (GO:0002757)	1.4	0.275
negative regulation of transcription by RNA polymerase II (GO:0000122)	1.26	0.277
positive regulation of lymphocyte differentiation (GO:0045621)	1.89	0.278
camera-type eye morphogenesis (GO:0048593)	1.89	0.278
brain development (GO:0007420)	1.32	0.278
establishment of protein localization to endoplasmic reticulum (GO:0072599)	0.41	0.278
positive regulation of production of molecular mediator of immune response (GO:0002702)	1.94	0.279
regulation of T cell differentiation (GO:0045580)	1.74	0.279
blood coagulation (GO:0007596)	1.53	0.279
negative regulation of phosphorylation (GO:0042326)	1.37	0.279
secondary alcohol metabolic process (GO:1902652)	1.8	0.28
defense response to bacterium (GO:0042742)	1.8	0.28
coagulation (GO:0050817)	1.53	0.28
positive regulation of cellular protein localization (GO:1903829)	1.42	0.28
negative regulation of nucleic acid-templated transcription (GO:1903507)	1.22	0.28
intracellular protein transport (GO:0006886)	0.79	0.28
negative regulation of RNA biosynthetic process (GO:1902679)	1.22	0.281
negative chemotaxis (GO:0050919)	2.61	0.282
TORC2 signaling (GO:0038203)	5.66	0.283
negative regulation of cell activation (GO:0050866)	1.66	0.283
negative regulation of cell development (GO:0010721)	1.48	0.283
positive regulation of kinase activity (GO:0033674)	1.33	0.283
COPII-coated vesicle budding (GO:0090114)	0.27	0.283
aminoglycan metabolic process (GO:0006022)	1.72	0.289
vesicle budding from membrane (GO:0006900)	0.37	0.289
hemostasis (GO:0007599)	1.53	0.29
cellular amide metabolic process (GO:0043603)	0.75	0.29
chloride transport (GO:0006821)	2.18	0.291
pattern specification process (GO:0007389)	1.46	0.291
RNA methylation (GO:0001510)	0.31	0.291
purine nucleoside triphosphate biosynthetic process (GO:0009145)	< 0.01	0.292
regulation of biomineral tissue development (GO:0070167)	1.98	0.292
regulation of biomineralization (GO:0110149)	1.98	0.293
metencephalon development (GO:0022037)	1.89	0.294
regulation of cellular response to growth factor stimulus (GO:0090287)	1.52	0.294
embryonic camera-type eye morphogenesis (GO:0048596)	2.99	0.296
regulation of alpha-beta T cell activation (GO:0046634)	1.94	0.299
telencephalon development (GO:0021537)	1.53	0.299
digestive tract development (GO:0048565)	1.94	0.3
central nervous system neuron differentiation (GO:0021953)	1.72	0.3
organic acid transport (GO:0015849)	1.55	0.301
carboxylic acid transport (GO:0046942)	1.55	0.301
regulation of mRNA metabolic process (GO:1903311)	0.63	0.302
positive regulation of epithelial to mesenchymal transition (GO:0010718)	2.23	0.31
negative regulation of axon extension involved in axon guidance (GO:0048843)	3.23	0.311
regulation of developmental growth (GO:0048638)	1.46	0.311
cellular response to drug (GO:0035690)	1.42	0.311
RNA 3'-end processing (GO:0031123)	0.44	0.311
collagen-activated signaling pathway (GO:0038065)	4.24	0.312
regulation of timing of cell differentiation (GO:0048505)	4.24	0.312
regulation of platelet aggregation (GO:0090330)	3.23	0.312
B cell proliferation (GO:0042100)	2.83	0.312
skeletal muscle organ development (GO:0060538)	1.84	0.312
endocytosis (GO:0006897)	1.4	0.312
cell cycle process (GO:0022402)	1.22	0.312
protein export from nucleus (GO:0006611)	0.49	0.313
regulation of cell-substrate adhesion (GO:0010810)	1.59	0.315
negative regulation of homotypic cell-cell adhesion (GO:0034111)	3.6	0.316
epithelial cell development (GO:0002064)	1.66	0.319
negative regulation of epithelial cell migration (GO:0010633)	2.09	0.329
regulation of alpha-beta T cell differentiation (GO:0046637)	2.09	0.33
negative regulation of leukocyte proliferation (GO:0070664)	2.09	0.331
adult behavior (GO:0030534)	1.86	0.336
positive regulation of developmental growth (GO:0048639)	1.64	0.337
negative regulation of cellular macromolecule biosynthetic process (GO:2000113)	1.19	0.338
positive regulation of alpha-beta T cell differentiation (GO:0046638)	2.33	0.339
morphogenesis of a branching epithelium (GO:0061138)	1.76	0.343
negative regulation of neuron projection development (GO:0010977)	1.68	0.343
homeostatic process (GO:0042592)	1.2	0.343
negative regulation of neurogenesis (GO:0050768)	1.5	0.344
negative regulation of protein modification process (GO:0031400)	1.3	0.347
negative regulation of apoptotic process (GO:0043066)	1.26	0.347
glomerulus development (GO:0032835)	2.42	0.349
adipose tissue development (GO:0060612)	2.42	0.349
cholesterol metabolic process (GO:0008203)	1.82	0.349
apoptotic signaling pathway (GO:0097190)	1.47	0.349
negative regulation of nervous system development (GO:0051961)	1.47	0.35
negative regulation of intracellular signal transduction (GO:1902532)	1.33	0.35
regulation of interleukin-4 production (GO:0032673)	2.83	0.353
organic acid transmembrane transport (GO:1903825)	1.79	0.353
regulation of leukocyte differentiation (GO:1902105)	1.49	0.353
macromolecule catabolic process (GO:0009057)	0.8	0.353
regulation of mRNA splicing, via spliceosome (GO:0048024)	0.38	0.353
vesicle coating (GO:0006901)	0.27	0.353
mature B cell differentiation (GO:0002335)	2.83	0.354
regulation of interleukin-1 production (GO:0032652)	2.05	0.354
carboxylic acid transmembrane transport (GO:1905039)	1.79	0.354
regulation of axonogenesis (GO:0050770)	1.58	0.354
regulation of body fluid levels (GO:0050878)	1.39	0.354
oxidative phosphorylation (GO:0006119)	0.38	0.354
positive regulation of muscle tissue development (GO:1901863)	2.05	0.355
cell division (GO:0051301)	1.31	0.356
organic substance metabolic process (GO:0071704)	0.94	0.356
negative regulation of chemotaxis (GO:0050922)	2.26	0.357
skeletal muscle tissue development (GO:0007519)	1.86	0.357
regulation of establishment of protein localization (GO:0070201)	1.28	0.36
cell-cell adhesion (GO:0098609)	1.42	0.361
cellular component organization (GO:0016043)	1.08	0.361
positive regulation of hemopoiesis (GO:1903708)	1.59	0.363
regulation of epithelial cell migration (GO:0010632)	1.56	0.363
cardiocyte differentiation (GO:0035051)	1.83	0.365
innate immune response (GO:0045087)	1.33	0.365
negative regulation of macromolecule biosynthetic process (GO:0010558)	1.19	0.365
cellular response to cytokine stimulus (GO:0071345)	1.24	0.366
mitochondrial ATP synthesis coupled electron transport (GO:0042775)	0.31	0.369
tetrahydrofolate metabolic process (GO:0046653)	3.02	0.372
amino acid import (GO:0043090)	3.02	0.373
carboxylic acid biosynthetic process (GO:0046394)	1.47	0.373
neurotransmitter uptake (GO:0001504)	3.02	0.374
endothelium development (GO:0003158)	1.89	0.374
protein targeting (GO:0006605)	0.68	0.377
regulation of transcription by RNA polymerase II (GO:0006357)	1.15	0.379
positive regulation of response to external stimulus (GO:0032103)	1.33	0.38
positive regulation of viral transcription (GO:0050434)	0.14	0.382
positive regulation of centriole replication (GO:0046601)	4.71	0.383
heart development (GO:0007507)	1.35	0.383
regulation of glomerular mesangial cell proliferation (GO:0072124)	4.71	0.384
histone H3-K27 trimethylation (GO:0098532)	4.71	0.384
regeneration (GO:0031099)	1.71	0.384
RNA polyadenylation (GO:0043631)	< 0.01	0.385
neuroblast division (GO:0055057)	3.3	0.386
neuronal stem cell division (GO:0036445)	3.3	0.387
regulation of stress-activated MAPK cascade (GO:0032872)	1.51	0.387
positive regulation of growth (GO:0045927)	1.49	0.387
maturation of LSU-rRNA (GO:0000470)	< 0.01	0.388
cAMP metabolic process (GO:0046058)	3.3	0.388
mature B cell differentiation involved in immune response (GO:0002313)	3.3	0.388
keratinocyte differentiation (GO:0030216)	2	0.388
negative regulation of MAPK cascade (GO:0043409)	1.6	0.388
regulation of protein localization to membrane (GO:1905475)	1.57	0.388
negative regulation of programmed cell death (GO:0043069)	1.25	0.388
mitochondrion organization (GO:0007005)	0.69	0.388
actin filament bundle assembly (GO:0051017)	2	0.389
neurotransmitter transport (GO:0006836)	1.69	0.39
regulation of development, heterochronic (GO:0040034)	3.77	0.393
small molecule biosynthetic process (GO:0044283)	1.31	0.393
regulation of toll-like receptor 2 signaling pathway (GO:0034135)	3.77	0.394
purine ribonucleoside triphosphate biosynthetic process (GO:0009206)	< 0.01	0.397
positive regulation of biomineral tissue development (GO:0070169)	2.37	0.397
positive regulation of biomineralization (GO:0110151)	2.37	0.398
cell-substrate junction assembly (GO:0007044)	2.37	0.398
regulation of lymphocyte differentiation (GO:0045619)	1.6	0.398
calcium ion transmembrane import into cytosol (GO:0097553)	2.06	0.399
negative regulation of cell morphogenesis involved in differentiation (GO:0010771)	1.83	0.399
L-amino acid transport (GO:0015807)	2.06	0.4
inorganic anion transport (GO:0015698)	1.76	0.4
trans-synaptic signaling (GO:0099537)	1.46	0.4
regulation of interleukin-1 beta production (GO:0032651)	2.06	0.401
negative regulation of metabolic process (GO:0009892)	1.12	0.403
production of molecular mediator of immune response (GO:0002440)	1.89	0.404
actin filament bundle organization (GO:0061572)	1.96	0.406
ion transport (GO:0006811)	1.23	0.406
immune response-regulating signaling pathway (GO:0002764)	1.34	0.409
negative regulation of immune system process (GO:0002683)	1.37	0.413
positive regulation of peptidase activity (GO:0010952)	1.55	0.417
extracellular matrix organization (GO:0030198)	1.52	0.417
chemical homeostasis (GO:0048878)	1.24	0.417
negative regulation of toll-like receptor signaling pathway (GO:0034122)	2.3	0.418
regulation of platelet activation (GO:0010543)	2.69	0.419
osteoblast differentiation (GO:0001649)	1.77	0.419
positive regulation of antigen receptor-mediated signaling pathway (GO:0050857)	2.69	0.42
chondroitin sulfate proteoglycan biosynthetic process (GO:0050650)	2.69	0.42
regulation of neurotransmitter levels (GO:0001505)	1.45	0.42
cerebellar cortex morphogenesis (GO:0021696)	2.69	0.421
extracellular structure organization (GO:0043062)	1.51	0.421
regulation of lipid biosynthetic process (GO:0046890)	1.56	0.422
sensory system development (GO:0048880)	1.44	0.422
regulation of macromolecule metabolic process (GO:0060255)	1.07	0.422
renal tubule development (GO:0061326)	2.01	0.425
organic acid biosynthetic process (GO:0016053)	1.46	0.425
inflammatory response (GO:0006954)	1.39	0.425
response to cytokine (GO:0034097)	1.22	0.425
mitochondrial respiratory chain complex assembly (GO:0033108)	0.39	0.425
cranial skeletal system development (GO:1904888)	2.01	0.426
mRNA 3'-end processing (GO:0031124)	0.36	0.432
negative regulation of axon guidance (GO:1902668)	2.83	0.437
lens morphogenesis in camera-type eye (GO:0002089)	2.83	0.437
cellular response to nitrogen compound (GO:1901699)	1.3	0.437
cellular response to peptide hormone stimulus (GO:0071375)	1.48	0.438
nuclear export (GO:0051168)	0.53	0.438
cellular response to peptide (GO:1901653)	1.41	0.442
regulation of animal organ morphogenesis (GO:2000027)	1.5	0.443
positive regulation of cytokine production (GO:0001819)	1.37	0.443
regulation of muscle tissue development (GO:1901861)	1.7	0.444
response to ischemia (GO:0002931)	2.12	0.448
release of sequestered calcium ion into cytosol (GO:0051209)	2.12	0.449
positive regulation of phagocytosis (GO:0050766)	2.12	0.449
Fc receptor mediated stimulatory signaling pathway (GO:0002431)	1.86	0.449
platelet activation (GO:0030168)	1.68	0.451
response to hypoxia (GO:0001666)	1.4	0.451
face morphogenesis (GO:0060325)	2.57	0.453
proline transmembrane transport (GO:0035524)	5.66	0.457
proline transport (GO:0015824)	5.66	0.457
muscle cell differentiation (GO:0042692)	1.53	0.457
compartment pattern specification (GO:0007386)	5.66	0.458
regulation of melanocyte differentiation (GO:0045634)	5.66	0.459
response to leucine (GO:0043201)	3.05	0.463
regulation of cell division (GO:0051302)	1.58	0.463
mRNA export from nucleus (GO:0006406)	0.44	0.463
mRNA-containing ribonucleoprotein complex export from nucleus (GO:0071427)	0.44	0.463
cranial nerve morphogenesis (GO:0021602)	3.05	0.464
positive regulation of cysteine-type endopeptidase activity (GO:2001056)	1.58	0.464
negative regulation of myoblast differentiation (GO:0045662)	3.05	0.465
positive regulation of ERK1 and ERK2 cascade (GO:0070374)	1.64	0.465
regulation of stress-activated protein kinase signaling cascade (GO:0070302)	1.49	0.467
lens development in camera-type eye (GO:0002088)	2.07	0.468
regulation of system process (GO:0044057)	1.36	0.468
adherens junction organization (GO:0034332)	1.89	0.469
negative regulation of axon extension (GO:0030517)	2.3	0.47
lymphocyte migration (GO:0072676)	2.3	0.47
central nervous system neuron development (GO:0021954)	1.96	0.47
regulation of cardiac muscle tissue development (GO:0055024)	1.89	0.47
positive regulation of tumor necrosis factor superfamily cytokine production (GO:1903557)	1.89	0.47
nucleosome assembly (GO:0006334)	1.71	0.47
cellular extravasation (GO:0045123)	2.3	0.471
response to vitamin (GO:0033273)	1.96	0.471
regulation of bone mineralization (GO:0030500)	1.96	0.471
embryonic skeletal system morphogenesis (GO:0048704)	1.89	0.471
positive regulation of cysteine-type endopeptidase activity involved in apoptotic process (GO:0043280)	1.62	0.471
endothelial cell differentiation (GO:0045446)	1.89	0.472
roof of mouth development (GO:0060021)	1.89	0.472
negative regulation of organelle organization (GO:0010639)	1.34	0.472
eye development (GO:0001654)	1.43	0.475
negative regulation of leukocyte activation (GO:0002695)	1.61	0.476
T cell activation (GO:0042110)	1.49	0.477
negative regulation of meiotic nuclear division (GO:0045835)	4.04	0.48
visual system development (GO:0150063)	1.42	0.48
regulation of membrane potential (GO:0042391)	1.41	0.48
regulation of glomerulus development (GO:0090192)	4.04	0.481
pre-replicative complex assembly (GO:0036388)	4.04	0.481
kidney vasculature development (GO:0061440)	3.39	0.481
renal system vasculature development (GO:0061437)	3.39	0.481
pre-replicative complex assembly involved in nuclear cell cycle DNA replication (GO:0006267)	4.04	0.482
dendritic cell chemotaxis (GO:0002407)	3.39	0.482
DNA strand elongation (GO:0022616)	2.46	0.482
negative regulation of sequestering of calcium ion (GO:0051283)	2.02	0.482
cardiac muscle tissue development (GO:0048738)	1.66	0.482
peptidyl-tyrosine modification (GO:0018212)	1.59	0.482
regulation of cysteine-type endopeptidase activity (GO:2000116)	1.47	0.482
anion transport (GO:0006820)	1.34	0.482
interleukin-1 beta production (GO:0032611)	4.04	0.483
actin crosslink formation (GO:0051764)	4.04	0.483
nephron tubule development (GO:0072080)	2.02	0.483
pre-replicative complex assembly involved in cell cycle DNA replication (GO:1902299)	4.04	0.484
positive regulation of MHC class II biosynthetic process (GO:0045348)	4.04	0.485
reflex (GO:0060004)	4.04	0.485
innate immune response in mucosa (GO:0002227)	4.04	0.486
activation of GTPase activity (GO:0090630)	1.77	0.487
mesoderm development (GO:0007498)	1.77	0.488
sterol metabolic process (GO:0016125)	1.67	0.488
regionalization (GO:0003002)	1.46	0.488
autophagosome maturation (GO:0097352)	< 0.01	0.491
apoptotic cell clearance (GO:0043277)	< 0.01	0.492
tRNA modification (GO:0006400)	0.41	0.492
regulation of protein complex assembly (GO:0043254)	1.31	0.494
cell-substrate adhesion (GO:0031589)	1.6	0.499
mammary gland epithelium development (GO:0061180)	2.1	0.501
camera-type eye development (GO:0043010)	1.44	0.503
spinal cord development (GO:0021510)	1.82	0.504
regulation of muscle system process (GO:0090257)	1.54	0.504
mRNA polyadenylation (GO:0006378)	< 0.01	0.507
receptor-mediated endocytosis (GO:0006898)	1.59	0.508
regulation of response to oxidative stress (GO:1902882)	1.78	0.514
ATP synthesis coupled electron transport (GO:0042773)	0.38	0.514
negative regulation of lymphocyte proliferation (GO:0050672)	1.97	0.515
tRNA aminoacylation (GO:0043039)	1.89	0.515
regulation of striated muscle tissue development (GO:0016202)	1.68	0.515
negative regulation of mononuclear cell proliferation (GO:0032945)	1.97	0.516
response to leukemia inhibitory factor (GO:1990823)	1.7	0.516
cellular response to leukemia inhibitory factor (GO:1990830)	1.7	0.517
nervous system process (GO:0050877)	1.27	0.517
maturation of SSU-rRNA (GO:0030490)	0.24	0.519
cellular macromolecule biosynthetic process (GO:0034645)	0.86	0.52
regulation of muscle organ development (GO:0048634)	1.66	0.523
vesicle targeting, to, from or within Golgi (GO:0048199)	0.35	0.526
negative regulation of growth (GO:0045926)	1.46	0.529
regulation of cell growth (GO:0001558)	1.34	0.531
chondroitin sulfate biosynthetic process (GO:0030206)	2.68	0.532
positive regulation of CD4-positive, alpha-beta T cell activation (GO:2000516)	2.36	0.532
positive regulation of cardiac muscle cell proliferation (GO:0060045)	2.68	0.533
cytosolic calcium ion transport (GO:0060401)	1.82	0.534
cellular amino acid biosynthetic process (GO:0008652)	1.82	0.534
immune effector process (GO:0002252)	1.22	0.534
steroid metabolic process (GO:0008202)	1.51	0.538
antibacterial humoral response (GO:0019731)	2.83	0.539
regulation of actin filament length (GO:0030832)	1.51	0.539
folic acid metabolic process (GO:0046655)	2.83	0.54
regulation of cytokine production (GO:0001817)	1.26	0.54
positive regulation of interleukin-4 production (GO:0032753)	2.83	0.541
positive regulation of vascular associated smooth muscle cell migration (GO:1904754)	2.83	0.541
positive regulation of neurogenesis (GO:0050769)	1.32	0.541
modified amino acid transport (GO:0072337)	2.83	0.542
positive regulation of cardiac muscle tissue development (GO:0055025)	2.19	0.542
vesicle targeting, rough ER to cis-Golgi (GO:0048207)	0.29	0.542
regulation of T cell receptor signaling pathway (GO:0050856)	2.19	0.543
B cell receptor signaling pathway (GO:0050853)	2.19	0.543
COPII vesicle coating (GO:0048208)	0.29	0.543
import across plasma membrane (GO:0098739)	1.89	0.544
Fc-gamma receptor signaling pathway involved in phagocytosis (GO:0038096)	1.8	0.544
immune response-regulating cell surface receptor signaling pathway involved in phagocytosis (GO:0002433)	1.8	0.545
drug metabolic process (GO:0017144)	1.35	0.548
positive regulation of striated muscle tissue development (GO:0045844)	1.97	0.55
regulation of angiogenesis (GO:0045765)	1.45	0.55
positive regulation of muscle organ development (GO:0048636)	1.97	0.551
regulation of cell-matrix adhesion (GO:0001952)	1.68	0.551
peptidyl-tyrosine phosphorylation (GO:0018108)	1.59	0.551
regulation of actin filament polymerization (GO:0030833)	1.52	0.552
positive regulation of endopeptidase activity (GO:0010950)	1.52	0.552
ion transmembrane transport (GO:0034220)	1.26	0.557
Fc-gamma receptor signaling pathway (GO:0038094)	1.77	0.562
regulation of peptidase activity (GO:0052547)	1.35	0.562
activation of immune response (GO:0002253)	1.32	0.562
posttranscriptional regulation of gene expression (GO:0010608)	0.75	0.562
positive regulation of cytokine biosynthetic process (GO:0042108)	2.03	0.563
regulation of toll-like receptor signaling pathway (GO:0034121)	1.85	0.563
positive regulation of tumor necrosis factor production (GO:0032760)	1.85	0.563
water-soluble vitamin metabolic process (GO:0006767)	1.77	0.563
negative regulation of plasma membrane bounded cell projection assembly (GO:0120033)	2.54	0.564
tissue regeneration (GO:0042246)	2.03	0.564
folic acid-containing compound metabolic process (GO:0006760)	2.54	0.565
alpha-beta T cell differentiation (GO:0046632)	2.03	0.565
morphogenesis of a branching structure (GO:0001763)	1.63	0.565
cerebellar Purkinje cell layer development (GO:0021680)	2.54	0.566
negative regulation of response to wounding (GO:1903035)	1.93	0.568
regulation of cysteine-type endopeptidase activity involved in apoptotic process (GO:0043281)	1.46	0.569
negative regulation of myotube differentiation (GO:0010832)	3.08	0.57
RNA phosphodiester bond hydrolysis (GO:0090501)	0.53	0.57
calcineurin-NFAT signaling cascade (GO:0033173)	3.08	0.571
histone H3-K27 methylation (GO:0070734)	3.08	0.571
cellular response to low-density lipoprotein particle stimulus (GO:0071404)	3.08	0.572
cholesterol biosynthetic process (GO:0006695)	2.12	0.572
skeletal muscle cell differentiation (GO:0035914)	2.12	0.572
regulation of smooth muscle contraction (GO:0006940)	2.12	0.573
negative regulation of protein kinase activity (GO:0006469)	1.44	0.573
negative regulation of macromolecule metabolic process (GO:0010605)	1.12	0.573
pteridine-containing compound metabolic process (GO:0042558)	2.26	0.574
alcohol biosynthetic process (GO:0046165)	1.64	0.574
positive regulation of chemotaxis (GO:0050921)	1.64	0.574
negative regulation of interleukin-6 production (GO:0032715)	2.26	0.575
cardiac muscle cell differentiation (GO:0055007)	1.82	0.575
Notch signaling involved in heart development (GO:0061314)	3.53	0.586
dermatan sulfate biosynthetic process (GO:0030208)	3.53	0.587
regulation of cellular protein localization (GO:1903827)	1.26	0.587
ribonucleoside triphosphate biosynthetic process (GO:0009201)	0.16	0.587
regulation of isotype switching to IgG isotypes (GO:0048302)	3.53	0.588
generation of precursor metabolites and energy (GO:0006091)	0.7	0.588
nuclear-transcribed mRNA catabolic process, exonucleolytic (GO:0000291)	0.16	0.588
cochlea morphogenesis (GO:0090103)	3.53	0.589
mesodermal cell differentiation (GO:0048333)	3.53	0.589
methylation (GO:0032259)	0.66	0.589
spliceosomal snRNP assembly (GO:0000387)	0.16	0.589
gamma-aminobutyric acid metabolic process (GO:0009448)	4.52	0.59
negative regulation of platelet aggregation (GO:0090331)	3.53	0.59
inner mitochondrial membrane organization (GO:0007007)	0.16	0.59
regulation of male gonad development (GO:2000018)	4.52	0.591
regulation of nucleotide-binding oligomerization domain containing 2 signaling pathway (GO:0070432)	4.52	0.591
glomerulus vasculature development (GO:0072012)	3.53	0.591
interleukin-1 production (GO:0032612)	3.53	0.591
positive regulation of male gonad development (GO:2000020)	4.52	0.592
immunological synapse formation (GO:0001771)	3.53	0.592
regulation of phagocytosis (GO:0050764)	1.79	0.592
negative regulation of transferase activity (GO:0051348)	1.38	0.592
collagen-activated tyrosine kinase receptor signaling pathway (GO:0038063)	4.52	0.593
semicircular canal morphogenesis (GO:0048752)	4.52	0.593
negative regulation of toll-like receptor 4 signaling pathway (GO:0034144)	3.53	0.593
cerebellar granular layer development (GO:0021681)	3.53	0.593
regulation of heart growth (GO:0060420)	1.89	0.593
tolerance induction (GO:0002507)	4.52	0.594
positive regulation of toll-like receptor 2 signaling pathway (GO:0034137)	4.52	0.595
proteoglycan biosynthetic process (GO:0030166)	1.98	0.595
cation transport (GO:0006812)	1.26	0.595
regulation of heart rate by chemical signal (GO:0003062)	4.52	0.596
positive regulation of interleukin-2 production (GO:0032743)	2.42	0.596
regulation of protein oligomerization (GO:0032459)	2.42	0.596
regulation of heart contraction (GO:0008016)	1.54	0.596
cell fate determination (GO:0001709)	2.42	0.597
inflammatory response to antigenic stimulus (GO:0002437)	2.42	0.598
one-carbon metabolic process (GO:0006730)	2.42	0.598
positive regulation of apoptotic process (GO:0043065)	1.25	0.598
carbohydrate transmembrane transport (GO:0034219)	2.42	0.599
T cell activation involved in immune response (GO:0002286)	2.06	0.603
osteoclast differentiation (GO:0030316)	2.06	0.603
gene silencing by RNA (GO:0031047)	0.4	0.603
transcription-coupled nucleotide-excision repair (GO:0006283)	0.39	0.603
secondary alcohol biosynthetic process (GO:1902653)	2.06	0.604
regulation of translational initiation (GO:0006446)	0.39	0.604
G protein-coupled receptor signaling pathway, coupled to cyclic nucleotide second messenger (GO:0007187)	1.62	0.605
positive regulation of nervous system development (GO:0051962)	1.29	0.605
regulation of actin polymerization or depolymerization (GO:0008064)	1.48	0.606
cellular response to oxygen levels (GO:0071453)	1.44	0.606
positive regulation of programmed cell death (GO:0043068)	1.25	0.606
intraciliary transport involved in cilium assembly (GO:0035735)	0.15	0.606
regulation of animal organ formation (GO:0003156)	2.64	0.607
somatic diversification of immune receptors (GO:0002200)	1.93	0.607
regulation of tissue remodeling (GO:0034103)	1.85	0.607
regulation of toll-like receptor 4 signaling pathway (GO:0034143)	2.64	0.608
peripheral nervous system development (GO:0007422)	1.93	0.608
regulation of endopeptidase activity (GO:0052548)	1.35	0.608
negative regulation of RNA metabolic process (GO:0051253)	1.16	0.608
regulation of dendrite development (GO:0050773)	1.55	0.609
positive regulation of gene expression (GO:0010628)	1.14	0.609
macromolecule biosynthetic process (GO:0009059)	0.87	0.617
energy derivation by oxidation of organic compounds (GO:0015980)	0.61	0.619
artery development (GO:0060840)	1.79	0.62
regulation of biosynthetic process (GO:0009889)	1.08	0.62
negative regulation of supramolecular fiber organization (GO:1902904)	1.56	0.621
leukocyte activation involved in immune response (GO:0002366)	1.26	0.621
negative regulation of defense response (GO:0031348)	1.49	0.626
ammonium transport (GO:0015696)	2.22	0.627
regulation of plasma membrane bounded cell projection assembly (GO:0120032)	1.49	0.627
neuron fate commitment (GO:0048663)	2.22	0.628
positive regulation of bone mineralization (GO:0030501)	2.22	0.628
positive regulation of interleukin-1 beta production (GO:0032731)	2.22	0.629
modulation of chemical synaptic transmission (GO:0050804)	1.34	0.629
positive regulation of heart growth (GO:0060421)	2.22	0.63
response to steroid hormone (GO:0048545)	1.37	0.631
lipid phosphorylation (GO:0046834)	1.76	0.633
regulation of calcium-mediated signaling (GO:0050848)	1.76	0.634
Golgi organization (GO:0007030)	0.52	0.634
regulation of protein depolymerization (GO:1901879)	1.76	0.635
intraciliary transport (GO:0042073)	0.25	0.636
striated muscle cell differentiation (GO:0051146)	1.51	0.641
amino acid activation (GO:0043038)	1.85	0.642
embryonic eye morphogenesis (GO:0048048)	2.31	0.646
striated muscle cell development (GO:0055002)	1.67	0.646
negative regulation of T cell activation (GO:0050868)	1.67	0.647
ventricular cardiac muscle cell differentiation (GO:0055012)	2.83	0.656
chromatin silencing at rDNA (GO:0000183)	2.83	0.657
calcineurin-mediated signaling (GO:0097720)	2.83	0.657
postsynaptic cytoskeleton organization (GO:0099188)	2.83	0.658
postsynaptic actin cytoskeleton organization (GO:0098974)	2.83	0.659
negative regulation of protein serine/threonine kinase activity (GO:0071901)	1.54	0.659
organic anion transport (GO:0015711)	1.33	0.659
positive regulation of protein oligomerization (GO:0032461)	2.83	0.66
smooth muscle tissue development (GO:0048745)	2.83	0.66
somatic stem cell division (GO:0048103)	2.66	0.66
inositol phosphate-mediated signaling (GO:0048016)	2.66	0.66
negative regulation of wound healing (GO:0061045)	2.04	0.66
regulation of hemostasis (GO:1900046)	1.93	0.66
regulation of blood coagulation (GO:0030193)	1.93	0.66
regulation of interleukin-13 production (GO:0032656)	2.83	0.661
regulation of myeloid cell apoptotic process (GO:0033032)	2.66	0.661
cellular response to epidermal growth factor stimulus (GO:0071364)	2.04	0.661
organonitrogen compound biosynthetic process (GO:1901566)	0.85	0.661
cerebellar Purkinje cell layer morphogenesis (GO:0021692)	2.83	0.662
left/right axis specification (GO:0070986)	2.83	0.662
cerebellar cortex formation (GO:0021697)	2.66	0.662
nephron epithelium development (GO:0072009)	1.81	0.662
leukocyte chemotaxis (GO:0030595)	1.81	0.662
regulation of actin cytoskeleton reorganization (GO:2000249)	2.15	0.663
regulation of blood circulation (GO:1903522)	1.48	0.663
ventricular septum morphogenesis (GO:0060412)	2.15	0.664
negative regulation of developmental growth (GO:0048640)	1.68	0.665
negative regulation of nucleobase-containing compound metabolic process (GO:0045934)	1.15	0.665
small molecule metabolic process (GO:0044281)	1.15	0.667
regulation of cell cycle (GO:0051726)	1.16	0.673
adenylate cyclase-activating G protein-coupled receptor signaling pathway (GO:0007189)	1.89	0.674
positive regulation of protein transport (GO:0051222)	1.31	0.674
positive regulation of wound healing (GO:0090303)	1.99	0.675
nerve development (GO:0021675)	1.99	0.676
regulation of interleukin-12 production (GO:0032655)	1.99	0.676
negative regulation of ERK1 and ERK2 cascade (GO:0070373)	1.78	0.676
regulation of tumor necrosis factor superfamily cytokine production (GO:1903555)	1.56	0.676
viral process (GO:0016032)	0.8	0.676
positive regulation of cell division (GO:0051781)	1.78	0.677
regulation of endothelial cell proliferation (GO:0001936)	1.66	0.678
cell activation involved in immune response (GO:0002263)	1.25	0.681
positive regulation of transcription, DNA-templated (GO:0045893)	1.15	0.681
regulation of netrin-activated signaling pathway (GO:1902841)	5.66	0.682
positive regulation of vasculature development (GO:1904018)	1.51	0.682
lipid metabolic process (GO:0006629)	1.18	0.682
endocardium morphogenesis (GO:0003160)	5.66	0.683
negative regulation of netrin-activated signaling pathway (GO:1902842)	5.66	0.683
anterior/posterior pattern specification (GO:0009952)	1.51	0.683
cornea development in camera-type eye (GO:0061303)	5.66	0.684
defense response to other organism (GO:0098542)	1.23	0.684
tryptophan transport (GO:0015827)	5.66	0.685
positive regulation of adipose tissue development (GO:1904179)	5.66	0.685
response to corticotropin-releasing hormone (GO:0043435)	5.66	0.686
cellular response to corticotropin-releasing hormone stimulus (GO:0071376)	5.66	0.687
otolith morphogenesis (GO:0032474)	5.66	0.687
reproductive structure development (GO:0048608)	1.33	0.687
interleukin-17 production (GO:0032620)	5.66	0.688
regulation of cell shape (GO:0008360)	1.47	0.688
positive regulation of cell death (GO:0010942)	1.23	0.688
regulation of relaxation of cardiac muscle (GO:1901897)	5.66	0.689
ovulation from ovarian follicle (GO:0001542)	5.66	0.689
carbohydrate derivative catabolic process (GO:1901136)	1.47	0.689
positive regulation of smooth muscle cell chemotaxis (GO:0071673)	5.66	0.69
cardiac chamber morphogenesis (GO:0003206)	1.69	0.69
cell-matrix adhesion (GO:0007160)	1.62	0.69
sulfur compound biosynthetic process (GO:0044272)	1.47	0.69
dephosphorylation (GO:0016311)	1.36	0.69
positive regulation of T cell activation via T cell receptor contact with antigen bound to MHC molecule on antigen presenting cell (GO:2001190)	5.66	0.691
regulation of cytokinetic process (GO:0032954)	5.66	0.691
forebrain neuroblast division (GO:0021873)	3.77	0.691
positive regulation of cytokine production involved in immune response (GO:0002720)	1.93	0.691
cAMP-mediated signaling (GO:0019933)	1.75	0.691
cyclic-nucleotide-mediated signaling (GO:0019935)	1.69	0.691
mitotic nuclear division (GO:0140014)	1.48	0.691
negative regulation of mRNA metabolic process (GO:1903312)	0.42	0.691
positive regulation of melanocyte differentiation (GO:0045636)	5.66	0.692
negative regulation of glial cell apoptotic process (GO:0034351)	3.77	0.692
ruffle assembly (GO:0097178)	3.14	0.692
regulation of sterol biosynthetic process (GO:0106118)	1.93	0.692
cell-cell recognition (GO:0009988)	1.93	0.692
proteoglycan metabolic process (GO:0006029)	1.75	0.692
cell cycle G1/S phase transition (GO:0044843)	1.5	0.692
chromatin assembly or disassembly (GO:0006333)	1.49	0.692
regulation of cell projection assembly (GO:0060491)	1.48	0.692
regulation of trans-synaptic signaling (GO:0099177)	1.34	0.692
negative regulation of myeloid leukocyte mediated immunity (GO:0002887)	3.77	0.693
T cell extravasation (GO:0072683)	3.77	0.693
dermatan sulfate metabolic process (GO:0030205)	3.14	0.693
metanephros development (GO:0001656)	1.93	0.693
nephron development (GO:0072006)	1.71	0.693
regulation of phospholipid metabolic process (GO:1903725)	1.71	0.693
semicircular canal development (GO:0060872)	3.77	0.694
folic acid-containing compound biosynthetic process (GO:0009396)	3.14	0.694
positive regulation of centrosome duplication (GO:0010825)	3.14	0.694
regulation of cholesterol biosynthetic process (GO:0045540)	1.93	0.694
negative regulation of neuron apoptotic process (GO:0043524)	1.55	0.694
small GTPase mediated signal transduction (GO:0007264)	1.32	0.694
positive regulation of isotype switching to IgG isotypes (GO:0048304)	3.77	0.695
glycine transport (GO:0015816)	3.77	0.695
myoblast migration (GO:0051451)	3.14	0.695
regulation of pigment cell differentiation (GO:0050932)	3.77	0.696
regulation of cell proliferation involved in kidney development (GO:1901722)	3.14	0.696
cellular response to hydrogen peroxide (GO:0070301)	1.76	0.696
alanine transport (GO:0032328)	3.77	0.697
retrograde trans-synaptic signaling (GO:0098917)	3.77	0.697
regulation of phagocytosis, engulfment (GO:0060099)	3.14	0.697
regulation of histone deacetylase activity (GO:1901725)	3.14	0.697
regulation of cytokine production involved in inflammatory response (GO:1900015)	2.07	0.697
somatic cell DNA recombination (GO:0016444)	2.01	0.697
positive regulation of endothelial cell proliferation (GO:0001938)	1.76	0.697
muscle cell development (GO:0055001)	1.63	0.697
positive regulation of MAPK cascade (GO:0043410)	1.29	0.697
maturation of 5.8S rRNA (GO:0000460)	0.18	0.697
regulation of growth rate (GO:0040009)	3.77	0.698
substrate-dependent cell migration, cell extension (GO:0006930)	3.14	0.698
replacement ossification (GO:0036075)	2.51	0.698
epithelial cell morphogenesis (GO:0003382)	2.51	0.698
exocrine system development (GO:0035272)	2.21	0.698
positive regulation of interleukin-1 production (GO:0032732)	2.07	0.698
regulation of chromatin silencing (GO:0031935)	2.07	0.698
negative regulation of osteoblast differentiation (GO:0045668)	2.01	0.698
positive regulation of mitochondrial outer membrane permeabilization involved in apoptotic signaling pathway (GO:1901030)	2.01	0.698
negative regulation of response to oxidative stress (GO:1902883)	1.89	0.698
collecting duct development (GO:0072044)	3.77	0.699
positive regulation of hepatocyte proliferation (GO:2000347)	3.77	0.699
regulation of vascular associated smooth muscle cell migration (GO:1904752)	2.51	0.699
regulation of protein insertion into mitochondrial membrane involved in apoptotic signaling pathway (GO:1900739)	2.21	0.699
somatic diversification of immune receptors via germline recombination within a single locus (GO:0002562)	2.01	0.699
cardiac cell development (GO:0055006)	1.89	0.699
immune response-activating cell surface receptor signaling pathway (GO:0002429)	1.35	0.699
negative regulation of cellular protein metabolic process (GO:0032269)	1.18	0.699
loop of Henle development (GO:0072070)	3.77	0.7
DNA strand elongation involved in DNA replication (GO:0006271)	2.51	0.7
regulation of axon extension involved in axon guidance (GO:0048841)	2.51	0.7
positive regulation of protein insertion into mitochondrial membrane involved in apoptotic signaling pathway (GO:1900740)	2.21	0.7
response to epidermal growth factor (GO:0070849)	1.89	0.7
chondrocyte differentiation (GO:0002062)	1.84	0.7
positive regulation of interferon-beta biosynthetic process (GO:0045359)	3.77	0.701
negative regulation of double-strand break repair via nonhomologous end joining (GO:2001033)	3.77	0.701
endochondral ossification (GO:0001958)	2.51	0.701
cranial nerve development (GO:0021545)	2.21	0.701
cardiac septum morphogenesis (GO:0060411)	1.84	0.701
mitotic sister chromatid segregation (GO:0000070)	1.57	0.701
anterograde trans-synaptic signaling (GO:0098916)	1.38	0.701
exonucleolytic catabolism of deadenylated mRNA (GO:0043928)	0.17	0.701
regulation of smooth muscle cell chemotaxis (GO:0071671)	3.77	0.702
negative regulation of protein depolymerization (GO:1901880)	1.8	0.702
negative regulation of lymphocyte activation (GO:0051250)	1.58	0.702
chemical synaptic transmission (GO:0007268)	1.38	0.702
positive regulation of transcription by RNA polymerase II (GO:0045944)	1.17	0.702
peptidyl-lysine modification (GO:0018205)	0.7	0.702
meiotic chromosome condensation (GO:0010032)	3.77	0.703
regulation of interleukin-12 secretion (GO:2001182)	3.77	0.703
response to lipoprotein particle (GO:0055094)	2.38	0.703
dicarboxylic acid transport (GO:0006835)	1.8	0.703
cellular response to antibiotic (GO:0071236)	1.58	0.703
regulation of gamma-delta T cell differentiation (GO:0045586)	3.77	0.704
epithelial cell differentiation involved in kidney development (GO:0035850)	2.38	0.704
positive T cell selection (GO:0043368)	2.38	0.704
regulation of JNK cascade (GO:0046328)	1.46	0.704
macromolecule deacylation (GO:0098732)	0.38	0.704
cerebellar granular layer morphogenesis (GO:0021683)	3.77	0.705
glutamine transport (GO:0006868)	3.77	0.705
regulation of lipopolysaccharide-mediated signaling pathway (GO:0031664)	2.38	0.705
regulation of cell cycle process (GO:0010564)	1.2	0.705
regulation of vascular smooth muscle contraction (GO:0003056)	3.77	0.706
liver development (GO:0001889)	1.56	0.711
negative regulation of MAP kinase activity (GO:0043407)	1.73	0.712
epidermis development (GO:0008544)	1.44	0.713
symbiotic process (GO:0044403)	0.81	0.713
multicellular organism growth (GO:0035264)	1.64	0.714
'de novo' posttranslational protein folding (GO:0051084)	0.17	0.714
maturation of SSU-rRNA from tricistronic rRNA transcript (SSU-rRNA, 5.8S rRNA, LSU-rRNA) (GO:0000462)	0.17	0.715
adrenal gland development (GO:0030325)	2.61	0.716
regulation of cellular biosynthetic process (GO:0031326)	1.08	0.716
negative regulation of cytokine production involved in inflammatory response (GO:1900016)	2.61	0.717
barbed-end actin filament capping (GO:0051016)	2.61	0.718
pteridine-containing compound biosynthetic process (GO:0042559)	2.61	0.718
organic hydroxy compound biosynthetic process (GO:1901617)	1.47	0.718
positive regulation of DNA damage response, signal transduction by p53 class mediator (GO:0043517)	2.61	0.719
positive regulation of stress-activated MAPK cascade (GO:0032874)	1.47	0.719
cellular response to insulin stimulus (GO:0032869)	1.47	0.719
DNA-templated transcription, elongation (GO:0006354)	0.47	0.719
negative regulation of chromatin silencing (GO:0031936)	2.61	0.72
positive regulation of T cell receptor signaling pathway (GO:0050862)	2.61	0.72
vesicle targeting (GO:0006903)	0.47	0.72
cytokine production involved in immune response (GO:0002367)	2.61	0.721
regulation of tumor necrosis factor production (GO:0032680)	1.55	0.721
regulation of Wnt signaling pathway (GO:0030111)	1.31	0.724
actin filament organization (GO:0007015)	1.4	0.724
RNA phosphodiester bond hydrolysis, exonucleolytic (GO:0090503)	0.27	0.725
negative regulation of mitotic metaphase/anaphase transition (GO:0045841)	2.18	0.732
hepaticobiliary system development (GO:0061008)	1.53	0.732
intrinsic apoptotic signaling pathway in response to DNA damage by p53 class mediator (GO:0042771)	2.18	0.733
regulation of interleukin-1 beta secretion (GO:0050706)	2.18	0.734
histone phosphorylation (GO:0016572)	2.18	0.734
cochlea development (GO:0090102)	2.18	0.735
head morphogenesis (GO:0060323)	2.18	0.736
negative regulation of metaphase/anaphase transition of cell cycle (GO:1902100)	2.18	0.736
regulation of vesicle-mediated transport (GO:0060627)	1.26	0.736
establishment of localization (GO:0051234)	1.08	0.736
sulfur compound transport (GO:0072348)	2.18	0.737
alpha-beta T cell activation (GO:0046631)	1.77	0.738
neural precursor cell proliferation (GO:0061351)	1.77	0.738
cellular response to acid chemical (GO:0071229)	1.48	0.738
positive regulation of viral process (GO:0048524)	0.52	0.738
regulation of antigen receptor-mediated signaling pathway (GO:0050854)	1.77	0.739
regulation of CD4-positive, alpha-beta T cell activation (GO:2000514)	1.89	0.745
nuclear DNA replication (GO:0033260)	1.89	0.745
regulation of axon extension (GO:0030516)	1.63	0.748
positive regulation of immune effector process (GO:0002699)	1.42	0.748
acidic amino acid transport (GO:0015800)	2	0.749
pancreas development (GO:0031016)	2	0.749
viral entry into host cell (GO:0046718)	1.67	0.749
regulation of striated muscle cell differentiation (GO:0051153)	1.63	0.749
monocarboxylic acid catabolic process (GO:0072329)	1.6	0.749
mammary gland development (GO:0030879)	1.6	0.749
spindle organization (GO:0007051)	1.46	0.749
monosaccharide metabolic process (GO:0005996)	1.42	0.749
response to inorganic substance (GO:0010035)	1.27	0.749
regulation of CD4-positive, alpha-beta T cell differentiation (GO:0043370)	2	0.75
humoral immune response (GO:0006959)	1.63	0.75
positive regulation of inflammatory response (GO:0050729)	1.63	0.75
positive regulation of translation (GO:0045727)	0.55	0.75
leukocyte cell-cell adhesion (GO:0007159)	2	0.751
regulation of protein polymerization (GO:0032271)	1.38	0.751
proteasomal ubiquitin-independent protein catabolic process (GO:0010499)	2.26	0.752
regulation of hormone biosynthetic process (GO:0046885)	2.26	0.753
positive regulation of CD4-positive, alpha-beta T cell differentiation (GO:0043372)	2.26	0.754
monosaccharide transmembrane transport (GO:0015749)	2.26	0.754
reproductive system development (GO:0061458)	1.31	0.754
cellular response to lipoprotein particle stimulus (GO:0071402)	2.26	0.755
neuron recognition (GO:0008038)	2.09	0.757
regulation of transcription involved in G1/S transition of mitotic cell cycle (GO:0000083)	2.09	0.758
detection of chemical stimulus involved in sensory perception (GO:0050907)	< 0.01	0.759
lipopolysaccharide-mediated signaling pathway (GO:0031663)	2.09	0.759
regulation of interleukin-1 secretion (GO:0050704)	2.09	0.759
tRNA wobble base modification (GO:0002097)	< 0.01	0.76
regulation of axon guidance (GO:1902667)	2.09	0.76
cell cycle DNA replication (GO:0044786)	1.84	0.76
regulation of cardiac muscle tissue growth (GO:0055021)	1.84	0.76
positive regulation of proteolysis (GO:0045862)	1.29	0.76
regulation of hemopoiesis (GO:1903706)	1.27	0.76
chromatin assembly (GO:0031497)	1.53	0.761
T cell differentiation (GO:0030217)	1.53	0.761
glucose metabolic process (GO:0006006)	1.56	0.762
negative regulation of catalytic activity (GO:0043086)	1.21	0.763
regulation of transcription involved in cell fate commitment (GO:0060850)	2.83	0.764
nuclear division (GO:0000280)	1.33	0.764
regulation of membrane invagination (GO:1905153)	2.83	0.765
hepatocyte differentiation (GO:0070365)	2.83	0.766
tetrahydrofolate interconversion (GO:0035999)	2.83	0.766
replicative senescence (GO:0090399)	2.83	0.767
negative regulation of meiotic cell cycle (GO:0051447)	2.83	0.767
G1/S transition of mitotic cell cycle (GO:0000082)	1.48	0.767
forebrain development (GO:0030900)	1.32	0.767
cellular response to leucine (GO:0071233)	2.83	0.768
positive regulation of interleukin-13 production (GO:0032736)	2.83	0.769
regulation of hepatocyte proliferation (GO:2000345)	2.83	0.769
positive regulation of organ growth (GO:0046622)	1.94	0.769
microtubule cytoskeleton organization (GO:0000226)	1.26	0.769
protein mannosylation (GO:0035268)	< 0.01	0.77
sterol biosynthetic process (GO:0016126)	1.94	0.77
regulation of cold-induced thermogenesis (GO:0120161)	1.51	0.77
regulation of cellular response to stress (GO:0080135)	1.2	0.77
heart looping (GO:0001947)	1.94	0.771
glycosaminoglycan catabolic process (GO:0006027)	1.94	0.771
positive regulation of Notch signaling pathway (GO:0045747)	1.94	0.772
developmental growth involved in morphogenesis (GO:0060560)	1.58	0.772
positive regulation of cell-substrate adhesion (GO:0010811)	1.58	0.773
axon ensheathment (GO:0008366)	1.58	0.773
nucleic acid phosphodiester bond hydrolysis (GO:0090305)	0.7	0.773
outflow tract morphogenesis (GO:0003151)	1.8	0.774
negative regulation of vasculature development (GO:1901343)	1.58	0.774
positive regulation of JNK cascade (GO:0046330)	1.5	0.774
negative regulation of protein metabolic process (GO:0051248)	1.17	0.774
ensheathment of neurons (GO:0007272)	1.58	0.775
negative regulation of neuron death (GO:1901215)	1.4	0.775
transport along microtubule (GO:0010970)	0.59	0.775
peptidyl-threonine phosphorylation (GO:0018107)	1.65	0.78
positive regulation of macromolecule biosynthetic process (GO:0010557)	1.12	0.78
regulation of RNA biosynthetic process (GO:2001141)	1.08	0.78
cellular response to ketone (GO:1901655)	1.65	0.781
ribonucleoprotein complex localization (GO:0071166)	0.58	0.781
positive regulation of biosynthetic process (GO:0009891)	1.12	0.783
nucleobase-containing compound transport (GO:0015931)	0.68	0.783
ATP biosynthetic process (GO:0006754)	< 0.01	0.784
regulation of ion transport (GO:0043269)	1.26	0.784
RNA export from nucleus (GO:0006405)	0.57	0.787
defense response to Gram-negative bacterium (GO:0050829)	2.02	0.788
positive regulation of defense response (GO:0031349)	1.28	0.788
cellular protein metabolic process (GO:0044267)	0.92	0.788
cerebellum morphogenesis (GO:0021587)	2.02	0.789
T cell selection (GO:0045058)	2.02	0.789
positive regulation of protein import into nucleus (GO:0042307)	1.89	0.79
negative regulation of T cell proliferation (GO:0042130)	1.89	0.79
positive regulation of response to DNA damage stimulus (GO:2001022)	1.55	0.79
negative regulation of protein complex assembly (GO:0031333)	1.51	0.79
negative regulation of cellular response to oxidative stress (GO:1900408)	1.89	0.791
glucose homeostasis (GO:0042593)	1.46	0.791
L-alpha-amino acid transmembrane transport (GO:1902475)	1.89	0.792
positive regulation of striated muscle cell differentiation (GO:0051155)	1.89	0.792
negative regulation of oxidative stress-induced cell death (GO:1903202)	1.89	0.793
regulation of coagulation (GO:0050818)	1.77	0.797
protein-DNA complex assembly (GO:0065004)	1.39	0.797
cerebral cortex tangential migration (GO:0021800)	3.23	0.798
tRNA aminoacylation for protein translation (GO:0006418)	1.77	0.798
regulation of interferon-beta production (GO:0032648)	1.77	0.798
positive regulation of leukocyte migration (GO:0002687)	1.57	0.798
cell cycle phase transition (GO:0044770)	1.29	0.798
organic hydroxy compound metabolic process (GO:1901615)	1.28	0.798
mitotic DNA replication initiation (GO:1902975)	4.24	0.799
regulation of glial cell apoptotic process (GO:0034350)	3.23	0.799
regulation of skeletal muscle adaptation (GO:0014733)	3.23	0.799
cyclic nucleotide metabolic process (GO:0009187)	2.15	0.799
immunoglobulin production (GO:0002377)	1.77	0.799
dichotomous subdivision of terminal units involved in salivary gland branching (GO:0060666)	4.24	0.8
negative adaptation of signaling pathway (GO:0022401)	3.23	0.8
focal adhesion assembly (GO:0048041)	2.15	0.8
positive regulation of platelet activation (GO:0010572)	4.24	0.801
regulation of transcription from RNA polymerase II promoter involved in myocardial precursor cell differentiation (GO:0003256)	4.24	0.801
embryonic camera-type eye formation (GO:0060900)	3.23	0.801
adaptation of signaling pathway (GO:0023058)	3.23	0.801
muscle cell migration (GO:0014812)	2.47	0.801
autonomic nervous system development (GO:0048483)	2.15	0.801
neuron cellular homeostasis (GO:0070050)	2.15	0.801
peptidyl-tyrosine dephosphorylation (GO:0035335)	1.56	0.801
response to transforming growth factor beta (GO:0071559)	1.46	0.801
positive regulation of centriole elongation (GO:1903724)	4.24	0.802
regulation of adipose tissue development (GO:1904177)	4.24	0.802
tetrahydrofolate biosynthetic process (GO:0046654)	3.23	0.802
regulation of gamma-delta T cell activation (GO:0046643)	3.23	0.802
myeloid dendritic cell activation (GO:0001773)	2.47	0.802
cell-substrate adherens junction assembly (GO:0007045)	2.15	0.802
glutamate secretion (GO:0014047)	2.15	0.802
cell aging (GO:0007569)	1.72	0.802
histone H3-K4 demethylation, trimethyl-H3-K4-specific (GO:0034721)	4.24	0.803
histone H3-K4 demethylation (GO:0034720)	3.23	0.803
negative regulation of response to drug (GO:2001024)	2.15	0.803
regulation of alcohol biosynthetic process (GO:1902930)	1.72	0.803
segmentation (GO:0035282)	1.69	0.803
cellular response to decreased oxygen levels (GO:0036294)	1.38	0.803
immune response-regulating cell surface receptor signaling pathway (GO:0002768)	1.31	0.803
regulation of nucleic acid-templated transcription (GO:1903506)	1.08	0.803
taurine transport (GO:0015734)	4.24	0.804
regulation of Toll signaling pathway (GO:0008592)	4.24	0.804
positive regulation of developmental pigmentation (GO:0048087)	3.23	0.804
cleavage furrow formation (GO:0036089)	3.23	0.804
neuroblast proliferation (GO:0007405)	2.15	0.804
T cell differentiation involved in immune response (GO:0002292)	2.15	0.804
renal tubule morphogenesis (GO:0061333)	1.83	0.804
regulation of synapse assembly (GO:0051963)	1.72	0.804
positive regulation of interleukin-6 production (GO:0032755)	1.69	0.804
carbohydrate homeostasis (GO:0033500)	1.45	0.804
alcohol metabolic process (GO:0006066)	1.32	0.804
interspecies interaction between organisms (GO:0044419)	0.83	0.804
mitochondrial respiratory chain complex I assembly (GO:0032981)	0.4	0.804
ribosome assembly (GO:0042255)	0.4	0.804
protein transport along microtubule (GO:0098840)	0.4	0.804
microtubule-based protein transport (GO:0099118)	0.4	0.804
negative regulation of ruffle assembly (GO:1900028)	4.24	0.805
chemorepulsion of axon (GO:0061643)	4.24	0.805
negative regulation of leukocyte degranulation (GO:0043301)	3.23	0.805
negative regulation of TOR signaling (GO:0032007)	1.83	0.805
determination of heart left/right asymmetry (GO:0061371)	1.83	0.805
positive regulation of response to wounding (GO:1903036)	1.76	0.805
regulation of production of molecular mediator of immune response (GO:0002700)	1.54	0.805
positive regulation of stress-activated protein kinase signaling cascade (GO:0070304)	1.45	0.805
cellular amino acid metabolic process (GO:0006520)	1.32	0.805
response to nutrient levels (GO:0031667)	1.25	0.805
response to extracellular stimulus (GO:0009991)	1.24	0.805
NADH dehydrogenase complex assembly (GO:0010257)	0.4	0.805
regulation of Ras GTPase binding (GO:1904475)	4.24	0.806
positive regulation of lipopolysaccharide-mediated signaling pathway (GO:0031666)	3.23	0.806
modification of postsynaptic structure (GO:0099010)	3.23	0.806
response to catecholamine (GO:0071869)	1.76	0.806
response to monoamine (GO:0071867)	1.76	0.806
positive regulation of ubiquitin-protein transferase activity (GO:0051443)	0.2	0.806
multivesicular body organization (GO:0036257)	0.2	0.806
amino-acid betaine transport (GO:0015838)	4.24	0.807
gamma-aminobutyric acid transport (GO:0015812)	4.24	0.807
embryonic digestive tract morphogenesis (GO:0048557)	3.23	0.807
positive regulation of protein localization to nucleus (GO:1900182)	1.59	0.807
calcium-mediated signaling (GO:0019722)	1.55	0.807
negative regulation of RNA catabolic process (GO:1902369)	0.35	0.807
intra-Golgi vesicle-mediated transport (GO:0006891)	0.2	0.807
mRNA cis splicing, via spliceosome (GO:0045292)	0.2	0.807
monocyte extravasation (GO:0035696)	4.24	0.808
nucleolar large rRNA transcription by RNA polymerase I (GO:0042790)	4.24	0.808
macropinocytosis (GO:0044351)	3.23	0.808
dendrite self-avoidance (GO:0070593)	3.23	0.808
positive regulation of actin filament polymerization (GO:0030838)	1.59	0.808
protein localization to plasma membrane (GO:0072659)	1.4	0.808
alkanesulfonate transport (GO:0042918)	4.24	0.809
cAMP catabolic process (GO:0006198)	3.23	0.809
negative regulation of leukocyte mediated immunity (GO:0002704)	1.95	0.809
response to cortisol (GO:0051414)	4.24	0.81
regulation of relaxation of muscle (GO:1901077)	4.24	0.81
establishment of endothelial intestinal barrier (GO:0090557)	3.23	0.81
positive regulation of gonad development (GO:1905941)	3.23	0.81
negative regulation of chromosome separation (GO:1905819)	1.95	0.81
platelet-derived growth factor receptor signaling pathway (GO:0048008)	1.95	0.81
negative regulation of kinase activity (GO:0033673)	1.34	0.81
protein deacylation (GO:0035601)	0.39	0.81
regulation of microvillus assembly (GO:0032534)	4.24	0.811
otolith development (GO:0048840)	4.24	0.811
desensitization of G protein-coupled receptor signaling pathway (GO:0002029)	3.23	0.811
response to vitamin E (GO:0033197)	3.23	0.811
negative regulation of mitotic sister chromatid separation (GO:2000816)	1.95	0.811
regulation of transmembrane receptor protein serine/threonine kinase signaling pathway (GO:0090092)	1.4	0.811
regulation of defense response (GO:0031347)	1.21	0.811
nuclear-transcribed mRNA catabolic process, deadenylation-dependent decay (GO:0000288)	0.39	0.811
regulation of canonical Wnt signaling pathway (GO:0060828)	1.32	0.812
cellular response to hydroperoxide (GO:0071447)	4.24	0.812
positive regulation of cellular respiration (GO:1901857)	3.23	0.812
response to carbohydrate (GO:0009743)	1.45	0.812
bone development (GO:0060348)	1.44	0.812
cell cycle (GO:0007049)	1.14	0.812
mRNA transport (GO:0051028)	0.61	0.812
cell cycle DNA replication initiation (GO:1902292)	4.24	0.813
optic cup morphogenesis involved in camera-type eye development (GO:0002072)	4.24	0.813
regulation of interferon-beta biosynthetic process (GO:0045357)	3.23	0.813
L-serine biosynthetic process (GO:0006564)	3.23	0.813
cellular macromolecule metabolic process (GO:0044260)	0.94	0.813
nuclear cell cycle DNA replication initiation (GO:1902315)	4.24	0.814
negative regulation of amino acid transport (GO:0051956)	4.24	0.814
protein insertion into mitochondrial membrane involved in apoptotic signaling pathway (GO:0001844)	3.23	0.814
endothelial cell migration (GO:0043542)	1.73	0.814
polyamine catabolic process (GO:0006598)	4.24	0.815
marginal zone B cell differentiation (GO:0002315)	3.23	0.815
regulation of endocytic recycling (GO:2001135)	3.23	0.815
negative regulation of axonogenesis (GO:0050771)	1.73	0.815
phospholipase C-activating dopamine receptor signaling pathway (GO:0060158)	4.24	0.816
positive regulation of CD4-positive, alpha-beta T cell proliferation (GO:2000563)	4.24	0.816
positive regulation of CD8-positive, alpha-beta T cell activation (GO:2001187)	3.23	0.816
alpha-amino acid biosynthetic process (GO:1901607)	1.73	0.816
positive regulation of nucleocytoplasmic transport (GO:0046824)	1.63	0.816
positive regulation of glomerular mesangial cell proliferation (GO:0072126)	4.24	0.817
branching involved in salivary gland morphogenesis (GO:0060445)	3.23	0.817
negative regulation of osteoblast proliferation (GO:0033689)	3.23	0.817
positive regulation of smooth muscle cell proliferation (GO:0048661)	1.63	0.817
positive regulation of interleukin-12 secretion (GO:2001184)	4.24	0.818
regulation of Rho guanyl-nucleotide exchange factor activity (GO:2001106)	4.24	0.818
positive regulation of fatty acid oxidation (GO:0046321)	2.57	0.818
negative regulation of neutrophil activation (GO:1902564)	4.24	0.819
regulation of T cell activation via T cell receptor contact with antigen bound to MHC molecule on antigen presenting cell (GO:2001188)	4.24	0.819
craniofacial suture morphogenesis (GO:0097094)	2.57	0.819
embryonic digestive tract development (GO:0048566)	2.33	0.819
pulmonary valve development (GO:0003177)	2.33	0.819
cell junction assembly (GO:0034329)	1.48	0.819
positive regulation of gamma-delta T cell differentiation (GO:0045588)	4.24	0.82
regulation of odontogenesis (GO:0042481)	2.57	0.82
microvillus assembly (GO:0030033)	2.57	0.82
mitotic chromosome condensation (GO:0007076)	2.33	0.82
kinetochore organization (GO:0051383)	2.33	0.82
microtubule cytoskeleton organization involved in mitosis (GO:1902850)	1.49	0.82
transmembrane transport (GO:0055085)	1.17	0.82
regulation of growth hormone receptor signaling pathway (GO:0060398)	4.24	0.821
serotonin transport (GO:0006837)	4.24	0.821
monoamine transport (GO:0015844)	2.57	0.821
positive regulation of tumor necrosis factor biosynthetic process (GO:0042535)	2.57	0.821
regulation of SMAD protein signal transduction (GO:0060390)	2.33	0.821
regulation of Notch signaling pathway (GO:0008593)	1.62	0.821
positive regulation of cellular biosynthetic process (GO:0031328)	1.12	0.821
tRNA methylation (GO:0030488)	0.28	0.821
cerebellar granular layer formation (GO:0021684)	4.24	0.822
chloride ion homeostasis (GO:0055064)	2.57	0.822
positive regulation of cell projection organization (GO:0031346)	1.28	0.822
cerebellar granule cell differentiation (GO:0021707)	4.24	0.823
heparan sulfate proteoglycan biosynthetic process, enzymatic modification (GO:0015015)	4.24	0.823
regulation of developmental pigmentation (GO:0048070)	2.57	0.823
calcium-mediated signaling using intracellular calcium source (GO:0035584)	2.57	0.823
positive regulation of transferase activity (GO:0051347)	1.2	0.823
RNA stabilization (GO:0043489)	0.3	0.823
alditol biosynthetic process (GO:0019401)	4.24	0.824
dermatan sulfate proteoglycan biosynthetic process (GO:0050651)	2.57	0.824
CD4-positive or CD8-positive, alpha-beta T cell lineage commitment (GO:0043369)	2.57	0.824
regulation of vascular endothelial growth factor signaling pathway (GO:1900746)	2.57	0.825
fatty acid catabolic process (GO:0009062)	1.57	0.825
cellular response to oxidative stress (GO:0034599)	1.35	0.825
positive regulation of nucleobase-containing compound metabolic process (GO:0045935)	1.12	0.825
N-acetylneuraminate metabolic process (GO:0006054)	2.57	0.826
double-strand break repair via break-induced replication (GO:0000727)	2.57	0.826
cellular response to gonadotropin stimulus (GO:0071371)	2.57	0.827
modification of synaptic structure (GO:0099563)	2.57	0.827
microtubule depolymerization (GO:0007019)	2.57	0.828
positive regulation of CREB transcription factor activity (GO:0032793)	2.57	0.828
regulation of MHC class II biosynthetic process (GO:0045346)	2.57	0.829
positive regulation of nucleic acid-templated transcription (GO:1903508)	1.13	0.829
metanephric nephron development (GO:0072210)	2.57	0.83
mucosal immune response (GO:0002385)	2.57	0.83
negative regulation of cell growth (GO:0030308)	1.4	0.83
regulation of synapse structure or activity (GO:0050803)	1.39	0.83
positive regulation of RNA biosynthetic process (GO:1902680)	1.13	0.83
metanephric nephron morphogenesis (GO:0072273)	2.57	0.831
negative regulation of leukocyte mediated cytotoxicity (GO:0001911)	2.57	0.831
defense response to Gram-positive bacterium (GO:0050830)	1.84	0.831
regulation of substrate adhesion-dependent cell spreading (GO:1900024)	1.84	0.831
glycolipid catabolic process (GO:0019377)	2.57	0.832
positive regulation of macrophage differentiation (GO:0045651)	2.57	0.833
positive regulation of cardiac muscle tissue growth (GO:0055023)	2.12	0.833
histone lysine demethylation (GO:0070076)	2.12	0.834
myelination (GO:0042552)	1.55	0.834
regulation of leukocyte chemotaxis (GO:0002688)	1.55	0.834
microtubule-based transport (GO:0099111)	0.64	0.834
positive regulation of interleukin-12 production (GO:0032735)	2.12	0.835
neurotransmitter receptor transport (GO:0099637)	2.12	0.835
epithelial cell migration (GO:0010631)	1.64	0.835
regulation of protein transport (GO:0051223)	1.21	0.835
ribonucleoprotein complex export from nucleus (GO:0071426)	0.58	0.835
epithelium migration (GO:0090132)	1.64	0.836
regulation of bone remodeling (GO:0046850)	1.94	0.837
retina morphogenesis in camera-type eye (GO:0060042)	1.94	0.838
neuromuscular process controlling balance (GO:0050885)	1.94	0.838
sodium ion transmembrane transport (GO:0035725)	1.79	0.838
artery morphogenesis (GO:0048844)	1.79	0.839
ureteric bud development (GO:0001657)	1.79	0.84
mitotic cell cycle phase transition (GO:0044772)	1.29	0.844
lipid oxidation (GO:0034440)	1.62	0.848
positive regulation of cold-induced thermogenesis (GO:0120162)	1.62	0.849
regulation of cellular response to oxidative stress (GO:1900407)	1.62	0.849
defense response (GO:0006952)	1.17	0.849
tissue migration (GO:0090130)	1.62	0.85
bone morphogenesis (GO:0060349)	1.62	0.851
leukocyte proliferation (GO:0070661)	1.62	0.851
regulation of smooth muscle cell proliferation (GO:0048660)	1.53	0.851
eye morphogenesis (GO:0048592)	1.53	0.851
positive regulation of intracellular protein transport (GO:0090316)	1.4	0.851
fatty acid oxidation (GO:0019395)	1.62	0.852
regulation of DNA-binding transcription factor activity (GO:0051090)	1.25	0.853
negative regulation of gene expression, epigenetic (GO:0045814)	1.56	0.856
positive regulation of isotype switching (GO:0045830)	2.2	0.857
aspartate family amino acid biosynthetic process (GO:0009067)	2.2	0.858
mammary gland duct morphogenesis (GO:0060603)	2.2	0.858
negative regulation of GTPase activity (GO:0034260)	1.75	0.858
hexose metabolic process (GO:0019318)	1.44	0.858
regulation of secretion (GO:0051046)	1.2	0.858
positive regulation of interleukin-1 beta secretion (GO:0050718)	2.2	0.859
central nervous system neuron axonogenesis (GO:0021955)	2.04	0.859
mesonephric tubule development (GO:0072164)	1.75	0.859
mesonephric epithelium development (GO:0072163)	1.75	0.859
adaptive immune response based on somatic recombination of immune receptors built from immunoglobulin superfamily domains (GO:0002460)	1.51	0.859
sensory perception of mechanical stimulus (GO:0050954)	1.51	0.859
negative regulation of molecular function (GO:0044092)	1.16	0.859
regulation of transcription, DNA-templated (GO:0006355)	1.08	0.859
positive regulation of amine transport (GO:0051954)	2.2	0.86
stem cell division (GO:0017145)	2.04	0.86
histone demethylation (GO:0016577)	2.04	0.86
negative regulation of leukocyte cell-cell adhesion (GO:1903038)	1.54	0.86
branching morphogenesis of an epithelial tube (GO:0048754)	1.54	0.86
positive regulation of protein targeting to membrane (GO:0090314)	2.04	0.861
positive regulation of release of cytochrome c from mitochondria (GO:0090200)	2.04	0.861
cellular respiration (GO:0045333)	0.62	0.861
regulation of collagen biosynthetic process (GO:0032965)	2.04	0.862
adherens junction assembly (GO:0034333)	1.89	0.862
regulation of muscle contraction (GO:0006937)	1.49	0.862
regulation of oxidative stress-induced neuron death (GO:1903203)	2.04	0.863
signal transduction involved in cellular response to ammonium ion (GO:1903831)	1.89	0.863
protein secretion (GO:0009306)	1.45	0.863
establishment of protein localization to extracellular region (GO:0035592)	1.45	0.863
endothelial cell development (GO:0001885)	1.89	0.864
embryonic cranial skeleton morphogenesis (GO:0048701)	1.89	0.864
regulation of secretion by cell (GO:1903530)	1.21	0.864
tRNA processing (GO:0008033)	0.61	0.875
respiratory system development (GO:0060541)	1.41	0.877
regulation of cytosolic calcium ion concentration (GO:0051480)	1.37	0.877
pallium development (GO:0021543)	1.41	0.878
positive regulation of cytokine secretion (GO:0050715)	1.52	0.882
negative regulation of natural killer cell mediated cytotoxicity (GO:0045953)	2.83	0.883
gastrulation (GO:0007369)	1.48	0.883
regulation of alkaline phosphatase activity (GO:0010692)	2.83	0.884
antigen receptor-mediated signaling pathway (GO:0050851)	1.36	0.884
quaternary ammonium group transport (GO:0015697)	2.83	0.885
water-soluble vitamin biosynthetic process (GO:0042364)	2.83	0.885
embryonic camera-type eye development (GO:0031076)	1.96	0.885
deoxyribonucleoside triphosphate catabolic process (GO:0009204)	2.83	0.886
ventricular cardiac muscle cell development (GO:0055015)	2.83	0.886
regulation of response to reactive oxygen species (GO:1901031)	1.96	0.886
negative regulation of actin filament depolymerization (GO:0030835)	1.96	0.886
antibiotic metabolic process (GO:0016999)	1.68	0.886
regulation of adherens junction organization (GO:1903391)	1.68	0.886
synapse assembly (GO:0007416)	1.65	0.886
positive regulation of membrane invagination (GO:1905155)	2.83	0.887
positive regulation of calcium-mediated signaling (GO:0050850)	1.96	0.887
regulation of oxidative stress-induced cell death (GO:1903201)	1.68	0.887
odontogenesis (GO:0042476)	1.57	0.887
positive regulation of B cell receptor signaling pathway (GO:0050861)	2.83	0.888
regulation of nucleotide-binding oligomerization domain containing signaling pathway (GO:0070424)	2.83	0.888
mammary gland morphogenesis (GO:0060443)	1.96	0.888
negative regulation of angiogenesis (GO:0016525)	1.57	0.888
lung development (GO:0030324)	1.45	0.888
negative regulation of Wnt signaling pathway (GO:0030178)	1.34	0.888
secretion (GO:0046903)	1.16	0.888
multi-organism process (GO:0051704)	1.1	0.888
respiratory electron transport chain (GO:0022904)	0.56	0.888
regulation of telomere maintenance (GO:0032204)	0.5	0.888
endosome to plasma membrane protein transport (GO:0099638)	2.83	0.889
neurotransmitter receptor transport, endosome to postsynaptic membrane (GO:0098887)	2.83	0.889
mesonephros development (GO:0001823)	1.71	0.889
negative regulation of nuclear division (GO:0051784)	1.71	0.889
response to hydrogen peroxide (GO:0042542)	1.49	0.889
glomerular visceral epithelial cell development (GO:0072015)	2.83	0.89
neurotransmitter receptor transport, endosome to plasma membrane (GO:0099639)	2.83	0.89
cardiac muscle cell development (GO:0055013)	1.83	0.89
regulation of glial cell differentiation (GO:0045685)	1.71	0.89
vocalization behavior (GO:0071625)	2.83	0.891
mesoderm formation (GO:0001707)	1.83	0.891
positive regulation of epithelial cell differentiation (GO:0030858)	1.83	0.891
nucleotide-excision repair (GO:0006289)	0.59	0.891
nephric duct development (GO:0072176)	2.83	0.892
positive regulation of phagocytosis, engulfment (GO:0060100)	2.83	0.892
cellular response to toxic substance (GO:0097237)	1.37	0.892
macromolecule methylation (GO:0043414)	0.7	0.892
regulation of calcium ion transmembrane transport via high voltage-gated calcium channel (GO:1902514)	2.83	0.893
endothelial cell morphogenesis (GO:0001886)	2.83	0.893
dentate gyrus development (GO:0021542)	2.83	0.894
ammonium transmembrane transport (GO:0072488)	2.83	0.895
glomerular epithelial cell development (GO:0072310)	2.83	0.895
internal protein amino acid acetylation (GO:0006475)	0.58	0.895
negative regulation of cytoskeleton organization (GO:0051494)	1.43	0.896
pseudouridine synthesis (GO:0001522)	< 0.01	0.897
ribosomal small subunit assembly (GO:0000028)	< 0.01	0.897
viral budding via host ESCRT complex (GO:0039702)	< 0.01	0.899
negative regulation of Rho protein signal transduction (GO:0035024)	< 0.01	0.899
metallo-sulfur cluster assembly (GO:0031163)	< 0.01	0.9
iron-sulfur cluster assembly (GO:0016226)	< 0.01	0.9
cellular lipid catabolic process (GO:0044242)	1.4	0.9
beta-catenin destruction complex disassembly (GO:1904886)	< 0.01	0.901
calcium ion transport (GO:0006816)	1.38	0.901
posttranscriptional gene silencing by RNA (GO:0035194)	0.43	0.903
tube formation (GO:0035148)	1.41	0.904
cellular response to reactive oxygen species (GO:0034614)	1.41	0.904
posttranscriptional gene silencing (GO:0016441)	0.42	0.904
spermine catabolic process (GO:0046208)	5.66	0.905
endocrine system development (GO:0035270)	1.58	0.905
positive regulation of peptidyl-tyrosine phosphorylation (GO:0050731)	1.41	0.905
establishment or maintenance of cell polarity (GO:0007163)	1.33	0.905
activation of protein kinase activity (GO:0032147)	1.29	0.905
blood vessel lumenization (GO:0072554)	5.66	0.906
negative regulation of syncytium formation by plasma membrane fusion (GO:0034242)	5.66	0.906
adenylate cyclase-modulating G protein-coupled receptor signaling pathway (GO:0007188)	1.52	0.906
regulation of extent of cell growth (GO:0061387)	1.52	0.906
cellular component organization or biogenesis (GO:0071840)	1.05	0.906
virion assembly (GO:0019068)	0.31	0.906
tolerance induction to lipopolysaccharide (GO:0072573)	5.66	0.907
chemokine (C-X-C motif) ligand 2 production (GO:0072567)	5.66	0.907
metal ion transport (GO:0030001)	1.23	0.907
regulation of macromolecule biosynthetic process (GO:0010556)	1.07	0.907
positive regulation of protein modification by small protein conjugation or removal (GO:1903322)	0.62	0.907
mitochondrion localization (GO:0051646)	0.32	0.907
regulation of insulin secretion involved in cellular response to glucose stimulus (GO:0061178)	0.32	0.907
positive regulation of mitotic cytokinetic process (GO:1903438)	5.66	0.908
regulation of mitotic cytokinetic process (GO:1903436)	5.66	0.908
regulation of mitotic metaphase/anaphase transition (GO:0030071)	1.62	0.908
protein-containing complex subunit organization (GO:0043933)	0.89	0.908
trachea submucosa development (GO:0061152)	5.66	0.909
habenula development (GO:0021986)	5.66	0.909
regulation of metaphase/anaphase transition of cell cycle (GO:1902099)	1.62	0.909
positive regulation of mitotic cytokinesis (GO:1903490)	5.66	0.91
trachea gland development (GO:0061153)	5.66	0.91
fasciculation of motor neuron axon (GO:0097156)	5.66	0.911
negative regulation of growth rate (GO:0045967)	5.66	0.911
closure of optic fissure (GO:0061386)	5.66	0.912
arterial endothelial cell fate commitment (GO:0060844)	5.66	0.912
regulation of voltage-gated potassium channel activity involved in ventricular cardiac muscle cell action potential repolarization (GO:1903760)	5.66	0.913
ripoptosome assembly (GO:0097343)	5.66	0.913
dendritic cell differentiation (GO:0097028)	2.08	0.913
response to dopamine (GO:1903350)	1.78	0.913
peptidyl-threonine modification (GO:0018210)	1.56	0.913
positive regulation of hippo signaling (GO:0035332)	5.66	0.914
regulation of fibroblast growth factor receptor signaling pathway (GO:0040036)	2.08	0.914
positive regulation of interleukin-1 secretion (GO:0050716)	2.08	0.914
cellular response to dopamine (GO:1903351)	1.78	0.914
L-ascorbic acid transmembrane transport (GO:0015882)	5.66	0.915
amine transport (GO:0015837)	5.66	0.915
fat-soluble vitamin metabolic process (GO:0006775)	2.08	0.915
regulation of actin filament depolymerization (GO:0030834)	1.78	0.915
anion homeostasis (GO:0055081)	1.78	0.915
forebrain generation of neurons (GO:0021872)	1.74	0.915
embryonic heart tube morphogenesis (GO:0003143)	1.74	0.915
L-tryptophan transmembrane transport (GO:1904556)	5.66	0.916
thiamine transport (GO:0015888)	5.66	0.916
cytokine secretion (GO:0050663)	1.78	0.916
mesoderm morphogenesis (GO:0048332)	1.78	0.916
positive regulation of protein import (GO:1904591)	1.74	0.916
adult locomotory behavior (GO:0008344)	1.74	0.916
carbohydrate transport (GO:0008643)	1.62	0.916
phosphatidylinositol phosphorylation (GO:0046854)	1.62	0.916
peptidyl-serine phosphorylation (GO:0018105)	1.36	0.916
response to reactive oxygen species (GO:0000302)	1.36	0.916
nucleocytoplasmic transport (GO:0006913)	0.72	0.916
memory T cell extravasation (GO:0035683)	5.66	0.917
regulation of membrane repolarization during ventricular cardiac muscle cell action potential (GO:1905024)	5.66	0.917
face development (GO:0060324)	1.78	0.917
fatty acid beta-oxidation (GO:0006635)	1.62	0.917
metaphase plate congression (GO:0051310)	1.62	0.917
positive regulation of neuron differentiation (GO:0045666)	1.26	0.917
negative regulation of neutrophil degranulation (GO:0043314)	5.66	0.918
gamma-aminobutyric acid catabolic process (GO:0009450)	5.66	0.918
regulation of cytokine biosynthetic process (GO:0042035)	1.55	0.918
cellular response to transforming growth factor beta stimulus (GO:0071560)	1.43	0.918
blood circulation (GO:0008015)	1.31	0.918
cellular catabolic process (GO:0044248)	0.9	0.918
electron transport chain (GO:0022900)	0.65	0.918
'de novo' protein folding (GO:0006458)	0.31	0.918
regulation of transcription elongation from RNA polymerase II promoter (GO:0034243)	0.2	0.918
adrenal cortex development (GO:0035801)	5.66	0.919
positive regulation of Golgi to plasma membrane protein transport (GO:0042998)	5.66	0.919
columnar/cuboidal epithelial cell differentiation (GO:0002065)	1.55	0.919
inositol lipid-mediated signaling (GO:0048017)	1.55	0.919
regulation of protein localization to cell periphery (GO:1904375)	1.45	0.919
chaperone cofactor-dependent protein refolding (GO:0051085)	0.2	0.919
multivesicular body assembly (GO:0036258)	0.2	0.919
regulation of sensory perception of pain (GO:0051930)	< 0.01	0.92
cloaca development (GO:0035844)	5.66	0.92
adrenal cortex formation (GO:0035802)	5.66	0.92
formation of primary germ layer (GO:0001704)	1.55	0.92
ripoptosome assembly involved in necroptotic process (GO:1901026)	5.66	0.921
paraxial mesoderm formation (GO:0048341)	5.66	0.921
regulation of NK T cell proliferation (GO:0051140)	5.66	0.922
negative regulation of NK T cell activation (GO:0051134)	5.66	0.922
regulation of extrinsic apoptotic signaling pathway (GO:2001236)	1.43	0.922
chemokine (C-C motif) ligand 2 secretion (GO:0035926)	5.66	0.923
positive regulation of protein localization to cell periphery (GO:1904377)	1.72	0.923
response to antibiotic (GO:0046677)	1.3	0.923
regulation of asymmetric cell division (GO:0009786)	5.66	0.924
enteric nervous system development (GO:0048484)	5.66	0.924
regulation of cholesterol metabolic process (GO:0090181)	1.72	0.924
regulation of nucleotide-binding oligomerization domain containing 1 signaling pathway (GO:0070428)	5.66	0.925
negative regulation of nucleotide-binding oligomerization domain containing signaling pathway (GO:0070425)	5.66	0.925
regulation of macrophage colony-stimulating factor production (GO:1901256)	5.66	0.926
negative regulation of nucleotide-binding oligomerization domain containing 2 signaling pathway (GO:0070433)	5.66	0.926
positive regulation of cell cycle process (GO:0090068)	1.29	0.926
negative regulation of glomerulus development (GO:0090194)	5.66	0.927
modification of dendritic spine (GO:0098886)	5.66	0.927
negative regulation of osteoclast proliferation (GO:0090291)	5.66	0.928
chemokine secretion (GO:0090195)	5.66	0.928
S-adenosylmethionine metabolic process (GO:0046500)	2.42	0.928
cellular response to steroid hormone stimulus (GO:0071383)	1.36	0.928
organic substance catabolic process (GO:1901575)	0.89	0.928
interleukin-12 production (GO:0032615)	5.66	0.929
norepinephrine uptake (GO:0051620)	5.66	0.929
glycoside metabolic process (GO:0016137)	2.42	0.929
mitochondrial outer membrane permeabilization (GO:0097345)	2.42	0.929
transmembrane receptor protein serine/threonine kinase signaling pathway (GO:0007178)	1.36	0.929
negative regulation of CD40 signaling pathway (GO:2000349)	5.66	0.93
hepatocyte proliferation (GO:0072574)	3.39	0.93
intrinsic apoptotic signaling pathway in response to oxidative stress (GO:0008631)	2.42	0.93
serine family amino acid biosynthetic process (GO:0009070)	2.42	0.93
desensitization of G protein-coupled receptor signaling pathway by arrestin (GO:0002032)	5.66	0.931
transepithelial L-ascorbic acid transport (GO:0070904)	5.66	0.931
epithelial cell proliferation involved in liver morphogenesis (GO:0072575)	3.39	0.931
negative regulation of natural killer cell mediated immunity (GO:0002716)	2.51	0.931
negative regulation of cellular response to drug (GO:2001039)	2.42	0.931
somatic hypermutation of immunoglobulin genes (GO:0016446)	2.42	0.931
potassium ion homeostasis (GO:0055075)	2.26	0.931
membrane lipid catabolic process (GO:0046466)	1.89	0.931
gastric acid secretion (GO:0001696)	5.66	0.932
negative regulation of eosinophil migration (GO:2000417)	5.66	0.932
regulation of vascular wound healing (GO:0061043)	3.39	0.932
substrate-dependent cerebral cortex tangential migration (GO:0021825)	3.39	0.932
terpenoid biosynthetic process (GO:0016114)	2.51	0.932
regulation of tau-protein kinase activity (GO:1902947)	2.51	0.932
cell differentiation in hindbrain (GO:0021533)	2.42	0.932
response to nitric oxide (GO:0071731)	2.42	0.932
glomerular epithelium development (GO:0072010)	2.26	0.932
monovalent inorganic anion homeostasis (GO:0055083)	2.26	0.932
somatic diversification of immunoglobulins (GO:0016445)	1.89	0.932
protein dealkylation (GO:0008214)	1.89	0.932
DNA conformation change (GO:0071103)	1.28	0.932
cellular response to organic cyclic compound (GO:0071407)	1.23	0.932
process utilizing autophagic mechanism (GO:0061919)	0.73	0.932
internal peptidyl-lysine acetylation (GO:0018393)	0.59	0.932
lacrimal gland development (GO:0032808)	5.66	0.933
endothelial cell-matrix adhesion (GO:0090673)	5.66	0.933
Toll signaling pathway (GO:0008063)	3.39	0.933
positive regulation of cytokine secretion involved in immune response (GO:0002741)	3.39	0.933
negative regulation of transcription by competitive promoter binding (GO:0010944)	2.51	0.933
glycoside catabolic process (GO:0016139)	2.51	0.933
innervation (GO:0060384)	2.42	0.933
neuromuscular synaptic transmission (GO:0007274)	2.26	0.933
endothelial cell proliferation (GO:0001935)	2.26	0.933
hindbrain morphogenesis (GO:0021575)	1.89	0.933
chondroitin sulfate proteoglycan metabolic process (GO:0050654)	1.89	0.933
protein demethylation (GO:0006482)	1.89	0.933
regulation of hormone metabolic process (GO:0032350)	1.89	0.933
regulation of cell-substrate junction assembly (GO:0090109)	1.65	0.933
positive regulation of adaptive immune response (GO:0002821)	1.54	0.933
cytokine production (GO:0001816)	1.43	0.933
cardiac chamber development (GO:0003205)	1.43	0.933
autophagy (GO:0006914)	0.73	0.933
regulation of viral transcription (GO:0046782)	0.47	0.933
positive regulation of CD8-positive, alpha-beta T cell proliferation (GO:2000566)	5.66	0.934
synaptic transmission, glycinergic (GO:0060012)	5.66	0.934
cardiac ventricle formation (GO:0003211)	3.39	0.934
positive regulation of tau-protein kinase activity (GO:1902949)	3.39	0.934
negative regulation of ubiquitin protein ligase activity (GO:1904667)	2.51	0.934
cyclic nucleotide catabolic process (GO:0009214)	2.51	0.934
response to UV-B (GO:0010224)	2.42	0.934
negative regulation of tissue remodeling (GO:0034104)	2.42	0.934
somatic diversification of immune receptors via somatic mutation (GO:0002566)	2.26	0.934
regulation of cell adhesion mediated by integrin (GO:0033628)	1.89	0.934
regulation of extracellular matrix organization (GO:1903053)	1.89	0.934
positive regulation of nitric oxide biosynthetic process (GO:0045429)	1.89	0.934
regulation of focal adhesion assembly (GO:0051893)	1.65	0.934
regulation of chemokine production (GO:0032642)	1.65	0.934
positive regulation of RNA metabolic process (GO:0051254)	1.12	0.934
cytoskeleton-dependent intracellular transport (GO:0030705)	0.66	0.934
mast cell secretory granule organization (GO:0033364)	5.66	0.935
neurotrophin production (GO:0032898)	5.66	0.935
maintenance of protein location in mitochondrion (GO:0072656)	3.39	0.935
endothelial cell chemotaxis (GO:0035767)	2.51	0.935
behavioral response to cocaine (GO:0048148)	2.51	0.935
positive regulation of immunoglobulin production (GO:0002639)	1.89	0.935
tissue remodeling (GO:0048771)	1.6	0.935
nerve growth factor production (GO:0032902)	5.66	0.936
brainstem development (GO:0003360)	3.39	0.936
telencephalon regionalization (GO:0021978)	3.39	0.936
positive regulation of protein localization to Cajal body (GO:1904871)	2.51	0.936
regulation of protein localization to Cajal body (GO:1904869)	2.51	0.936
response to monosaccharide (GO:0034284)	1.44	0.936
positive regulation of NF-kappaB transcription factor activity (GO:0051092)	1.4	0.936
Fc receptor signaling pathway (GO:0038093)	1.36	0.936
serotonin secretion (GO:0001820)	5.66	0.937
negative regulation of glomerular mesangial cell proliferation (GO:0072125)	5.66	0.937
positive regulation of gamma-delta T cell activation (GO:0046645)	3.39	0.937
positive regulation of alkaline phosphatase activity (GO:0010694)	3.39	0.937
regulation of chemokine secretion (GO:0090196)	2.51	0.937
cellular response to leucine starvation (GO:1990253)	2.51	0.937
behavior (GO:0007610)	1.23	0.937
monocarboxylic acid metabolic process (GO:0032787)	1.23	0.937
secretion by cell (GO:0032940)	1.15	0.937
positive regulation of interleukin-4 biosynthetic process (GO:0045404)	5.66	0.938
regulation of interleukin-4 biosynthetic process (GO:0045402)	5.66	0.938
renal system vasculature morphogenesis (GO:0061438)	3.39	0.938
regulation of centriole elongation (GO:1903722)	3.39	0.938
fructose 6-phosphate metabolic process (GO:0006002)	2.51	0.938
positive regulation of chemokine secretion (GO:0090197)	2.51	0.938
serotonin production involved in inflammatory response (GO:0002351)	5.66	0.939
positive regulation of endocytic recycling (GO:2001137)	5.66	0.939
kidney vasculature morphogenesis (GO:0061439)	3.39	0.939
positive regulation of astrocyte differentiation (GO:0048711)	2.51	0.939
response to follicle-stimulating hormone (GO:0032354)	2.51	0.939
cardiac ventricle morphogenesis (GO:0003208)	1.79	0.939
epithalamus development (GO:0021538)	5.66	0.94
vitamin A metabolic process (GO:0006776)	5.66	0.94
response to forskolin (GO:1904321)	3.39	0.94
amyloid-beta clearance by cellular catabolic process (GO:0150094)	3.39	0.94
pyrimidine dimer repair (GO:0006290)	2.51	0.94
regulation of presynaptic cytosolic calcium ion concentration (GO:0099509)	2.51	0.94
establishment of endothelial barrier (GO:0061028)	2.06	0.94
ventricular cardiac muscle tissue development (GO:0003229)	1.82	0.94
aminoglycan catabolic process (GO:0006026)	1.79	0.94
regulation of peptide transport (GO:0090087)	1.18	0.94
nuclear transport (GO:0051169)	0.74	0.94
regulation of metanephric glomerulus development (GO:0072298)	5.66	0.941
regulation of odontogenesis of dentin-containing tooth (GO:0042487)	3.39	0.941
cellular response to forskolin (GO:1904322)	3.39	0.941
positive regulation of chemokine (C-X-C motif) ligand 2 production (GO:2000343)	2.51	0.941
regulation of AMPA receptor activity (GO:2000311)	2.51	0.941
olfactory lobe development (GO:0021988)	2.06	0.941
negative regulation of protein kinase B signaling (GO:0051898)	1.82	0.941
myofibril assembly (GO:0030239)	1.82	0.941
positive regulation of chemokine production (GO:0032722)	1.79	0.941
regulation of filopodium assembly (GO:0051489)	1.79	0.941
aorta development (GO:0035904)	1.7	0.941
regulation of mitochondrial outer membrane permeabilization involved in apoptotic signaling pathway (GO:1901028)	1.7	0.941
regulation of proteolysis (GO:0030162)	1.18	0.941
regulation of metanephric glomerular mesangial cell proliferation (GO:0072301)	5.66	0.942
serotonin secretion involved in inflammatory response (GO:0002442)	5.66	0.942
regulation of cellular response to macrophage colony-stimulating factor stimulus (GO:1903972)	3.39	0.942
regulation of response to macrophage colony-stimulating factor (GO:1903969)	3.39	0.942
positive regulation of interleukin-8 secretion (GO:2000484)	2.51	0.942
regulation of interleukin-5 production (GO:0032674)	2.51	0.942
regulation of cellular respiration (GO:0043457)	2.06	0.942
positive regulation of fatty acid metabolic process (GO:0045923)	2.06	0.942
postsynaptic density organization (GO:0097106)	1.89	0.942
negative regulation of heart contraction (GO:0045822)	1.89	0.942
negative regulation of pri-miRNA transcription by RNA polymerase II (GO:1902894)	1.89	0.942
body morphogenesis (GO:0010171)	1.82	0.942
regulation of amine transport (GO:0051952)	1.82	0.942
drug transmembrane transport (GO:0006855)	1.7	0.942
positive regulation of protein localization to plasma membrane (GO:1903078)	1.7	0.942
skin development (GO:0043588)	1.41	0.942
sister chromatid segregation (GO:0000819)	1.36	0.942
response to toxic substance (GO:0009636)	1.24	0.942
positive regulation of growth hormone receptor signaling pathway (GO:0060399)	5.66	0.943
cranial nerve formation (GO:0021603)	5.66	0.943
L-alanine transport (GO:0015808)	3.39	0.943
negative regulation of cardiac muscle cell proliferation (GO:0060044)	2.51	0.943
cardiac muscle cell proliferation (GO:0060038)	2.51	0.943
fatty acid elongation (GO:0030497)	1.89	0.943
positive regulation of activated T cell proliferation (GO:0042104)	1.89	0.943
regulation of catecholamine metabolic process (GO:0042069)	1.89	0.943
regulation of dopamine metabolic process (GO:0042053)	1.89	0.943
negative regulation of Notch signaling pathway (GO:0045746)	1.82	0.943
animal organ regeneration (GO:0031100)	1.68	0.943
activation of cysteine-type endopeptidase activity involved in apoptotic process (GO:0006919)	1.53	0.943
epidermal cell differentiation (GO:0009913)	1.5	0.943
sensory perception of sound (GO:0007605)	1.5	0.943
cerebellar Purkinje cell layer structural organization (GO:0021693)	5.66	0.944
cerebellar molecular layer development (GO:0021679)	5.66	0.944
histone dephosphorylation (GO:0016576)	3.39	0.944
purine deoxyribonucleoside triphosphate catabolic process (GO:0009217)	3.39	0.944
regulation of neutrophil activation (GO:1902563)	2.51	0.944
regulation of monocyte chemotactic protein-1 production (GO:0071637)	2.51	0.944
leukocyte adhesion to vascular endothelial cell (GO:0061756)	1.89	0.944
positive regulation of macrophage activation (GO:0043032)	1.89	0.944
response to auditory stimulus (GO:0010996)	1.89	0.944
positive regulation of cytokine production involved in inflammatory response (GO:1900017)	1.89	0.944
regulation of microglial cell activation (GO:1903978)	1.89	0.944
erythrocyte homeostasis (GO:0034101)	1.33	0.944
natural killer cell tolerance induction (GO:0002519)	5.66	0.945
cerebellar cortex structural organization (GO:0021698)	5.66	0.945
paraxial mesoderm morphogenesis (GO:0048340)	3.39	0.945
Golgi vesicle fusion to target membrane (GO:0048210)	3.39	0.945
positive regulation of mammary gland epithelial cell proliferation (GO:0033601)	2.51	0.945
positive regulation of cellular senescence (GO:2000774)	2.51	0.945
regulation of vascular endothelial cell proliferation (GO:1905562)	1.89	0.945
regulation of establishment of protein localization to chromosome (GO:0070202)	1.89	0.945
megakaryocyte development (GO:0035855)	1.89	0.945
cellular response to increased oxygen levels (GO:0036295)	1.89	0.945
myelin maintenance (GO:0043217)	1.89	0.945
myeloid leukocyte activation (GO:0002274)	1.2	0.945
nitric oxide production involved in inflammatory response (GO:0002537)	5.66	0.946
response to light intensity (GO:0009642)	3.39	0.946
regulation of T-helper 2 cell differentiation (GO:0045628)	2.51	0.946
intracellular sterol transport (GO:0032366)	1.89	0.946
regulation of phospholipid biosynthetic process (GO:0071071)	1.89	0.946
leukocyte tethering or rolling (GO:0050901)	1.89	0.946
kinetochore assembly (GO:0051382)	1.89	0.946
nucleosome organization (GO:0034728)	1.4	0.946
snRNA transcription (GO:0009301)	0.5	0.946
thiamine transmembrane transport (GO:0071934)	5.66	0.947
specification of animal organ position (GO:0010159)	5.66	0.947
positive regulation of mitochondrial ATP synthesis coupled electron transport (GO:1905448)	3.39	0.947
regulation of NK T cell activation (GO:0051133)	3.39	0.947
oocyte maturation (GO:0001556)	1.89	0.947
regulation of chemokine (C-X-C motif) ligand 2 production (GO:2000341)	1.89	0.947
cellular response to growth hormone stimulus (GO:0071378)	1.89	0.947
muscle cell proliferation (GO:0033002)	1.89	0.947
transepithelial transport (GO:0070633)	1.89	0.947
negative regulation of cell adhesion involved in substrate-bound cell migration (GO:0006933)	5.66	0.948
serotonin secretion by platelet (GO:0002554)	5.66	0.948
neural crest cell migration involved in autonomic nervous system development (GO:1901166)	3.39	0.948
positive regulation of smooth muscle cell differentiation (GO:0051152)	3.39	0.948
cellular response to nitric oxide (GO:0071732)	1.89	0.948
trophectodermal cell differentiation (GO:0001829)	1.89	0.948
mitotic nuclear envelope disassembly (GO:0007077)	1.89	0.948
histone H3-K9 demethylation (GO:0033169)	1.89	0.948
regulation of histone phosphorylation (GO:0033127)	1.89	0.948
positive regulation of T cell tolerance induction (GO:0002666)	5.66	0.949
negative regulation of MyD88-dependent toll-like receptor signaling pathway (GO:0034125)	5.66	0.949
positive regulation of glomerulus development (GO:0090193)	3.39	0.949
positive regulation of pigment cell differentiation (GO:0050942)	3.39	0.949
T-helper 17 cell differentiation (GO:0072539)	2.26	0.949
T-helper 17 type immune response (GO:0072538)	2.26	0.949
regulation of calcidiol 1-monooxygenase activity (GO:0060558)	2.26	0.949
regulation of synaptic vesicle transport (GO:1902803)	2.26	0.949
somatic recombination of T cell receptor gene segments (GO:0002681)	2.26	0.949
positive regulation of cell adhesion mediated by integrin (GO:0033630)	1.89	0.949
growth hormone receptor signaling pathway (GO:0060396)	1.89	0.949
IMP metabolic process (GO:0046040)	1.89	0.949
I-kappaB phosphorylation (GO:0007252)	1.89	0.949
purine nucleoside diphosphate metabolic process (GO:0009135)	1.38	0.949
regulation of protein maturation (GO:1903317)	1.38	0.949
steroid hormone mediated signaling pathway (GO:0043401)	1.31	0.949
regulation of protein binding (GO:0043393)	1.2	0.949
positive regulation of neuron projection development (GO:0010976)	1.2	0.949
cAMP biosynthetic process (GO:0006171)	3.39	0.95
olfactory bulb interneuron differentiation (GO:0021889)	2.26	0.95
regulation of fear response (GO:1903365)	2.26	0.95
L-methionine salvage from methylthioadenosine (GO:0019509)	2.26	0.95
cell fate commitment involved in pattern specification (GO:0060581)	2.26	0.95
ventral spinal cord interneuron fate commitment (GO:0060579)	2.26	0.95
purine ribonucleoside diphosphate metabolic process (GO:0009179)	1.38	0.95
RNA localization (GO:0006403)	0.7	0.95
ribosomal large subunit biogenesis (GO:0042273)	0.49	0.95
regulation of neutrophil apoptotic process (GO:0033029)	3.39	0.951
actin filament network formation (GO:0051639)	3.39	0.951
regulation of phospholipid catabolic process (GO:0060696)	2.26	0.951
regulation of secondary heart field cardioblast proliferation (GO:0003266)	2.26	0.951
negative regulation of Arp2/3 complex-mediated actin nucleation (GO:0034316)	2.26	0.951
regulation of endoplasmic reticulum tubular network organization (GO:1903371)	2.26	0.951
purine ribonucleoside triphosphate metabolic process (GO:0009205)	0.39	0.951
gene silencing by miRNA (GO:0035195)	0.39	0.951
positive regulation of cell proliferation involved in kidney development (GO:1901724)	3.39	0.952
cartilage condensation (GO:0001502)	3.39	0.952
positive regulation of inhibitory postsynaptic potential (GO:0097151)	2.26	0.952
positive regulation of acute inflammatory response to antigenic stimulus (GO:0002866)	2.26	0.952
osteoclast fusion (GO:0072675)	2.26	0.952
L-lysine transmembrane transport (GO:1903401)	2.26	0.952
L-arginine transmembrane transport (GO:1903400)	2.26	0.952
regulation of fat cell differentiation (GO:0045598)	1.48	0.952
peptide secretion (GO:0002790)	1.4	0.952
detection of chemical stimulus (GO:0009593)	0.39	0.952
protein sulfation (GO:0006477)	3.39	0.953
pericardium morphogenesis (GO:0003344)	2.26	0.953
positive regulation of mast cell chemotaxis (GO:0060754)	2.26	0.953
striated muscle atrophy (GO:0014891)	2.26	0.953
olfactory behavior (GO:0042048)	2.26	0.953
regulation of muscle cell differentiation (GO:0051147)	1.4	0.953
respiratory tube development (GO:0030323)	1.4	0.953
cytokine-mediated signaling pathway (GO:0019221)	1.19	0.953
metanephric collecting duct development (GO:0072205)	3.39	0.954
glomerulus morphogenesis (GO:0072102)	3.39	0.954
regulation of photoreceptor cell differentiation (GO:0046532)	2.26	0.954
desmosome organization (GO:0002934)	2.26	0.954
retina vasculature morphogenesis in camera-type eye (GO:0061299)	2.26	0.954
regulation of extracellular exosome assembly (GO:1903551)	2.26	0.954
regulation of membrane tubulation (GO:1903525)	2.26	0.954
aging (GO:0007568)	1.29	0.954
regulation of ion transmembrane transport (GO:0034765)	1.18	0.954
metanephric renal vesicle morphogenesis (GO:0072283)	3.39	0.955
regulation of sarcomere organization (GO:0060297)	3.39	0.955
neutrophil differentiation (GO:0030223)	2.26	0.955
regulation of chaperone-mediated protein folding (GO:1903644)	2.26	0.955
lymphatic endothelial cell differentiation (GO:0060836)	2.26	0.955
negative regulation of photoreceptor cell differentiation (GO:0046533)	2.26	0.955
positive regulation of leukocyte chemotaxis (GO:0002690)	1.6	0.955
negative regulation of blood vessel morphogenesis (GO:2000181)	1.54	0.955
post-embryonic development (GO:0009791)	1.54	0.955
specification of symmetry (GO:0009799)	1.51	0.955
cardiac muscle cell myoblast differentiation (GO:0060379)	3.39	0.956
positive regulation of basement membrane assembly involved in embryonic body morphogenesis (GO:1904261)	2.26	0.956
regulation of basement membrane assembly involved in embryonic body morphogenesis (GO:1904259)	2.26	0.956
negative regulation of fibroblast migration (GO:0010764)	2.26	0.956
positive regulation of pyruvate dehydrogenase activity (GO:1904184)	2.26	0.956
skeletal muscle thin filament assembly (GO:0030240)	2.26	0.956
regulation of protein import into nucleus (GO:0042306)	1.6	0.956
hematopoietic progenitor cell differentiation (GO:0002244)	1.54	0.956
mitotic spindle organization (GO:0007052)	1.51	0.956
positive regulation of epithelial cell migration (GO:0010634)	1.44	0.956
organelle fission (GO:0048285)	1.27	0.956
regulation of chromatin organization (GO:1902275)	1.21	0.956
organic substance biosynthetic process (GO:1901576)	0.95	0.956
regulation of mechanoreceptor differentiation (GO:0045631)	3.39	0.957
regulation of inner ear auditory receptor cell differentiation (GO:0045607)	3.39	0.957
peroxisome proliferator activated receptor signaling pathway (GO:0035357)	2.26	0.957
homoserine metabolic process (GO:0009092)	2.26	0.957
diterpenoid biosynthetic process (GO:0016102)	2.26	0.957
hindgut development (GO:0061525)	2.26	0.957
positive regulation of muscle contraction (GO:0045933)	1.97	0.957
positive regulation of B cell mediated immunity (GO:0002714)	1.97	0.957
microtubule polymerization or depolymerization (GO:0031109)	1.66	0.957
regulation of protein kinase B signaling (GO:0051896)	1.36	0.957
positive regulation of protein complex assembly (GO:0031334)	1.29	0.957
lung-associated mesenchyme development (GO:0060484)	3.39	0.958
negative regulation of toll-like receptor 2 signaling pathway (GO:0034136)	3.39	0.958
pyrimidine deoxyribonucleoside monophosphate biosynthetic process (GO:0009177)	2.26	0.958
branched-chain amino acid transport (GO:0015803)	2.26	0.958
nonassociative learning (GO:0046958)	2.26	0.958
gap junction assembly (GO:0016264)	2.26	0.958
negative regulation of cellular response to hypoxia (GO:1900038)	2.26	0.958
response to fungus (GO:0009620)	1.97	0.958
positive regulation of immunoglobulin mediated immune response (GO:0002891)	1.97	0.958
negative regulation of type I interferon production (GO:0032480)	1.66	0.958
epithelial tube formation (GO:0072175)	1.29	0.958
regulation of protein complex disassembly (GO:0043244)	1.29	0.958
regulation of mitotic nuclear division (GO:0007088)	1.24	0.958
organelle disassembly (GO:1903008)	0.59	0.958
regulation of inner ear receptor cell differentiation (GO:2000980)	3.39	0.959
positive regulation of lipophagy (GO:1904504)	2.26	0.959
regulation of lipophagy (GO:1904502)	2.26	0.959
female meiosis chromosome segregation (GO:0016321)	2.26	0.959
leukotriene signaling pathway (GO:0061737)	2.26	0.959
female meiotic nuclear division (GO:0007143)	1.97	0.959
positive regulation of stem cell proliferation (GO:2000648)	1.97	0.959
response to corticosteroid (GO:0031960)	1.41	0.959
export from cell (GO:0140352)	1.15	0.959
positive regulation of action potential (GO:0045760)	3.39	0.96
L-proline biosynthetic process (GO:0055129)	2.26	0.96
amino acid salvage (GO:0043102)	2.26	0.96
aminoglycoside antibiotic metabolic process (GO:0030647)	2.26	0.96
cellular chloride ion homeostasis (GO:0030644)	2.26	0.96
polyketide metabolic process (GO:0030638)	2.26	0.96
regulation of T-helper cell differentiation (GO:0045622)	1.97	0.96
protein autophosphorylation (GO:0046777)	1.33	0.96
positive regulation of cellular amide metabolic process (GO:0034250)	0.63	0.96
auditory behavior (GO:0031223)	2.26	0.961
regulation of metalloendopeptidase activity (GO:1904683)	2.26	0.961
regulation of somatic stem cell population maintenance (GO:1904672)	2.26	0.961
very long-chain fatty acid catabolic process (GO:0042760)	2.26	0.961
lipid homeostasis (GO:0055088)	1.47	0.961
[truncated: 12,525 more rows]
