# Supplementary material for: A KMT2A-AFF1 gene regulatory network highlights the role of core transcription factors and reveals the regulatory logic of key downstream target genes
Source: Genome Res. 2021 Jul;31(7):1159–73. doi: 10.1101/gr.268490.120 (PMC8256865; doi:10.1101/gr.268490.120)
Supplement: Supplemental Material [file supp_gr.268490.120_Supplemental_Data_S5.xlsx]

## Sheet: Legend
Supplemental Data S5. Results of CRISPR screen in combination with venetoclax treatment in THP-1 cells.
MAGeCK results of venetoclax CRISPR screen in THP-1 Cells. Comparison is T0 baseline with T18 venetoclax.

## Sheet: Results of VEN + TKOv3 screen
id	num	neg|score	neg|p-value	neg|fdr	neg|rank	neg|goodsgrna	neg|lfc	pos|score	pos|p-value	pos|fdr	pos|rank	pos|goodsgrna	pos|lfc	if_CEGv2_score
DOLK	4	1.04e-09	2.74e-07	1.3e-05	1	4	-2.0744	1	1	1	18050	0	-2.0744	1.0447e-09
PPP1R2	4	1.84e-09	2.74e-07	1.3e-05	2	4	-1.9418	1	1	1	18049	0	-1.9418
POLR2L	4	2.18e-09	2.74e-07	1.3e-05	3	4	-2.4451	1	1	1	18048	0	-2.4451	2.1753e-09
PRPF38A	4	3.27e-09	2.74e-07	1.3e-05	4	4	-2.014	1	1	1	18047	0	-2.014	3.2732e-09
HSPA5	4	5.01e-09	2.74e-07	1.3e-05	5	4	-2.2279	1	1	1	18046	0	-2.2279
TUBB	4	6.95e-09	2.74e-07	1.3e-05	6	4	-2.3617	1	1	1	18045	0	-2.3617	6.9537e-09
SF3B3	4	8.34e-09	2.74e-07	1.3e-05	7	4	-2.3569	1	1	1	18044	0	-2.3569	8.337e-09
GPN3	4	1.87e-08	2.74e-07	1.3e-05	8	4	-2.6439	1	1	1	18015	0	-2.6439	1.8734e-08
GAB2	4	1.99e-08	2.74e-07	1.3e-05	9	4	-1.964	1	1	1	18043	0	-1.964
PLK1	4	2.07e-08	2.74e-07	1.3e-05	10	4	-1.8849	1	1	1	18042	0	-1.8849	2.073e-08
PSMA6	4	2.72e-08	2.74e-07	1.3e-05	11	4	-2.2834	1	1	1	18041	0	-2.2834	2.7237e-08
DYNC1I2	4	3.37e-08	2.74e-07	1.3e-05	12	4	-1.7196	1	1	1	18040	0	-1.7196	3.3738e-08
DNM1L	4	4.22e-08	2.74e-07	1.3e-05	13	4	-2.1799	1	1	1	18039	0	-2.1799
CCT6A	4	4.48e-08	2.74e-07	1.3e-05	14	4	-2.5334	1	1	1	17990	0	-2.5334	4.481e-08
MUL1	4	4.96e-08	2.74e-07	1.3e-05	15	4	-1.8662	1	1	1	18038	0	-1.8662
LRR1	4	5.09e-08	2.74e-07	1.3e-05	16	4	-2.1394	1	1	1	18037	0	-2.1394	5.092e-08
METTL3	4	6.27e-08	2.74e-07	1.3e-05	17	4	-1.7398	1	1	1	18036	0	-1.7398
ATP6V1B2	4	9.62e-08	2.74e-07	1.3e-05	18	4	-2.2498	1	1	1	18032	0	-2.2498
WDR82	4	1.05e-07	2.74e-07	1.3e-05	19	4	-2.3131	0.99999	1	1	17972	0	-2.3131
TMED2	4	1.09e-07	2.74e-07	1.3e-05	20	4	-1.9419	1	1	1	18035	0	-1.9419
NAMPT	4	1.1e-07	2.74e-07	1.3e-05	21	4	-1.9416	1	1	1	18034	0	-1.9416	1.104e-07
PSMB7	4	1.13e-07	2.74e-07	1.3e-05	22	4	-2.208	1	1	1	18031	0	-2.208	1.1255e-07
MED24	4	1.2e-07	2.74e-07	1.3e-05	23	4	-1.5975	1	1	1	18033	0	-1.5975
ENO1	4	1.32e-07	2.74e-07	1.3e-05	24	4	-1.9712	0.99964	1	1	17758	0	-1.9712
LSM2	4	1.36e-07	2.74e-07	1.3e-05	25	3	-2.1178	0.46263	0.82638	1	8198	1	-2.1178	1.3593e-07
THOC7	4	1.74e-07	2.74e-07	1.3e-05	26	4	-1.541	1	1	1	18030	0	-1.541
SS18L2	4	2.2e-07	2.74e-07	1.3e-05	27	4	-2.1762	0.99993	1	1	17877	0	-2.1762	2.2001e-07
MYC	4	2.63e-07	2.74e-07	1.3e-05	28	4	-1.6003	1	1	1	18029	0	-1.6003	2.625e-07
POLR2F	4	2.67e-07	2.74e-07	1.3e-05	29	3	-2.2242	0.79472	0.96388	1	13295	0	-2.2242
ANKLE2	4	2.87e-07	2.74e-07	1.3e-05	30	4	-1.5983	0.99994	1	1	17888	0	-1.5983
DDX11	4	4.12e-07	2.74e-07	1.3e-05	31	4	-1.2148	1	1	1	18028	0	-1.2148
UBL5	4	4.79e-07	2.74e-07	1.3e-05	32	4	-1.6574	1	1	1	18027	0	-1.6574	4.7899e-07
PSMB5	4	5.28e-07	2.74e-07	1.3e-05	33	4	-1.5958	1	1	1	18026	0	-1.5958
HSPA9	4	5.45e-07	2.74e-07	1.3e-05	34	4	-1.4788	1	1	1	18025	0	-1.4788	5.4489e-07
ILF2	4	5.49e-07	2.74e-07	1.3e-05	35	4	-1.4056	1	1	1	18024	0	-1.4056
PSMA7	4	5.66e-07	2.74e-07	1.3e-05	36	4	-1.4325	1	1	1	18023	0	-1.4325	5.6557e-07
VMP1	4	6.52e-07	2.74e-07	1.3e-05	37	4	-1.5238	1	1	1	18022	0	-1.5238
NXF1	4	7.06e-07	2.74e-07	1.3e-05	38	4	-1.6995	1	1	1	18021	0	-1.6995	7.0644e-07
SAMM50	4	7.11e-07	2.74e-07	1.3e-05	39	4	-1.5104	1	1	1	18020	0	-1.5104	7.1058e-07
TADA1	4	7.4e-07	2.74e-07	1.3e-05	40	4	-1.6247	1	1	1	18019	0	-1.6247
CCT3	4	7.54e-07	2.74e-07	1.3e-05	41	4	-1.8862	1	1	1	18018	0	-1.8862	7.5442e-07
POLR2G	4	7.59e-07	2.74e-07	1.3e-05	42	4	-2.1072	0.99994	1	1	17881	0	-2.1072	7.5949e-07
PTPN23	4	7.99e-07	2.74e-07	1.3e-05	43	4	-1.3395	1	1	1	18017	0	-1.3395	7.9876e-07
THOC2	4	8e-07	2.74e-07	1.3e-05	44	4	-1.7314	1	1	1	18016	0	-1.7314	8.0027e-07
DDX3X	4	9.02e-07	2.74e-07	1.3e-05	45	3	-1.944	0.81394	0.97049	1	13616	0	-1.944
POLA2	4	1.07e-06	2.74e-07	1.3e-05	46	4	-1.2778	1	1	1	18014	0	-1.2778	1.0672e-06
POLR1B	4	1.17e-06	2.74e-07	1.3e-05	47	4	-1.7702	1	1	1	18013	0	-1.7702	1.1682e-06
PRPF4	4	1.24e-06	2.74e-07	1.3e-05	48	4	-1.1357	1	1	1	18012	0	-1.1357	1.2442e-06
GTF2A1	4	1.3e-06	2.74e-07	1.3e-05	49	4	-1.4384	1	1	1	18011	0	-1.4384
DHX9	4	1.36e-06	2.74e-07	1.3e-05	50	4	-1.1929	1	1	1	18010	0	-1.1929	1.3596e-06
UBE2I	4	1.4e-06	2.74e-07	1.3e-05	51	4	-1.3574	0.99996	1	1	17907	0	-1.3574
BORA	4	1.41e-06	2.74e-07	1.3e-05	52	4	-1.1765	1	1	1	18009	0	-1.1765
SNRNP200	4	1.49e-06	2.74e-07	1.3e-05	53	4	-1.534	1	1	1	18008	0	-1.534	1.4876e-06
SUPT6H	4	1.54e-06	2.74e-07	1.3e-05	54	4	-1.5747	1	1	1	18007	0	-1.5747	1.5363e-06
SMU1	4	1.58e-06	2.74e-07	1.3e-05	55	4	-2.0648	1	1	1	18006	0	-2.0648	1.5761e-06
2005-09-01	4	1.68e-06	2.74e-07	1.3e-05	56	4	-1.346	1	1	1	18005	0	-1.346
SF3B4	4	1.8e-06	2.74e-07	1.3e-05	57	4	-1.7444	1	1	1	18004	0	-1.7444
RNGTT	4	1.92e-06	2.74e-07	1.3e-05	58	3	-2.3678	0.99791	1	1	17563	0	-2.3678	1.9209e-06
RPAP1	4	1.94e-06	2.74e-07	1.3e-05	59	4	-1.3471	1	1	1	18003	0	-1.3471
INTS8	4	2.11e-06	2.74e-07	1.3e-05	60	4	-1.5162	1	1	1	18002	0	-1.5162	2.1138e-06
WBP11	4	2.2e-06	2.74e-07	1.3e-05	61	4	-2.0975	0.99999	1	1	17955	0	-2.0975
CENPM	4	2.41e-06	2.74e-07	1.3e-05	62	4	-1.7656	0.99979	1	1	17815	0	-1.7656
PSMC6	4	2.52e-06	2.74e-07	1.3e-05	63	4	-1.4666	1	1	1	18001	0	-1.4666	2.5227e-06
HIRA	4	2.54e-06	2.74e-07	1.3e-05	64	4	-1.2215	1	1	1	18000	0	-1.2215
EIF5B	4	2.56e-06	2.74e-07	1.3e-05	65	3	-1.9094	0.61011	0.88382	1	10206	1	-1.9094	2.5608e-06
CCT2	4	2.76e-06	2.74e-07	1.3e-05	66	4	-1.5099	1	1	1	17999	0	-1.5099	2.7595e-06
ACTR10	4	2.77e-06	2.74e-07	1.3e-05	67	4	-1.1213	1	1	1	17998	0	-1.1213	2.771e-06
GMPPB	4	2.83e-06	2.74e-07	1.3e-05	68	4	-0.97316	1	1	1	17997	0	-0.97316	2.8329e-06
HNRNPK	4	2.87e-06	2.74e-07	1.3e-05	69	4	-1.9018	0.99999	1	1	17952	0	-1.9018	2.8736e-06
ABL1	4	2.93e-06	2.74e-07	1.3e-05	70	4	-1.7048	1	1	1	17996	0	-1.7048
SNRPD2	4	2.98e-06	2.74e-07	1.3e-05	71	4	-1.304	1	1	1	17995	0	-1.304	2.9759e-06
SACM1L	4	3e-06	2.74e-07	1.3e-05	72	4	-1.6301	1	1	1	17994	0	-1.6301	3.0003e-06
INPPL1	4	3.22e-06	2.74e-07	1.3e-05	73	4	-1.3644	1	1	1	17993	0	-1.3644
PCNA	4	3.26e-06	2.74e-07	1.3e-05	74	4	-1.8193	1	1	1	17992	0	-1.8193	3.2566e-06
RAN	4	3.34e-06	2.74e-07	1.3e-05	75	4	-2.0599	0.99999	1	1	17965	0	-2.0599	3.3437e-06
PSMD2	4	3.51e-06	2.74e-07	1.3e-05	76	4	-1.3546	1	1	1	17991	0	-1.3546
SUPT16H	4	3.53e-06	2.74e-07	1.3e-05	77	4	-1.9389	0.99999	1	1	17967	0	-1.9389
NSF	4	3.98e-06	2.74e-07	1.3e-05	78	3	-1.9399	0.79838	0.96388	1	13368	0	-1.9399	3.9789e-06
PSMA5	4	4.03e-06	2.74e-07	1.3e-05	79	4	-1.5925	0.99984	1	1	17832	0	-1.5925	4.0295e-06
HAUS1	3	4.13e-06	2.74e-07	1.3e-05	80	3	-1.2023	1	1	1	17989	0	-1.2023	4.1259e-06
COPA	4	4.2e-06	2.74e-07	1.3e-05	81	4	-1.3984	1	1	1	17988	0	-1.3984	4.2027e-06
TBX1	4	4.52e-06	2.74e-07	1.3e-05	82	4	-1.2728	1	1	1	17987	0	-1.2728
RPL14	4	4.63e-06	2.74e-07	1.3e-05	83	4	-1.1445	1	1	1	17986	0	-1.1445	4.6325e-06
RAB36	4	4.73e-06	2.74e-07	1.3e-05	84	4	-1.3152	1	1	1	17985	0	-1.3152
SOS1	4	4.96e-06	2.74e-07	1.3e-05	85	4	-1.3525	1	1	1	17984	0	-1.3525
RAD21	4	5.06e-06	2.74e-07	1.3e-05	86	4	-1.3723	0.99999	1	1	17983	0	-1.3723	5.0583e-06
SEC61A1	4	5.13e-06	2.74e-07	1.3e-05	87	3	-1.6608	0.46078	0.82638	1	8170	1	-1.6608
RANGAP1	4	5.33e-06	2.74e-07	1.3e-05	88	4	-1.796	0.99999	1	1	17982	0	-1.796	5.3287e-06
MED20	4	5.4e-06	2.74e-07	1.3e-05	89	4	-1.0325	0.99999	1	1	17981	0	-1.0325
RNF113A	4	5.42e-06	2.74e-07	1.3e-05	90	3	-1.7207	0.99767	0.99999	1	17546	0	-1.7207
CENPI	4	5.6e-06	2.74e-07	1.3e-05	91	4	-1.2376	0.99999	1	1	17980	0	-1.2376
PSMB4	4	5.65e-06	2.74e-07	1.3e-05	92	3	-2.0134	0.9975	0.99999	1	17530	0	-2.0134	5.648e-06
LDB1	4	5.79e-06	2.74e-07	1.3e-05	93	4	-1.3866	0.99999	1	1	17979	0	-1.3866
FBL	4	5.83e-06	2.74e-07	1.3e-05	94	4	-1.2495	0.99999	1	1	17978	0	-1.2495
CTR9	4	5.84e-06	2.74e-07	1.3e-05	95	4	-1.0565	0.99999	1	1	17977	0	-1.0565	5.8413e-06
SRSF3	4	6.01e-06	2.74e-07	1.3e-05	96	4	-1.2737	0.99999	1	1	17976	0	-1.2737	6.0109e-06
KARS	4	6.07e-06	2.74e-07	1.3e-05	97	4	-1.1247	0.99999	1	1	17975	0	-1.1247	6.066e-06
THOC3	4	6.08e-06	2.74e-07	1.3e-05	98	4	-1.7738	0.99933	1	1	17711	0	-1.7738	6.0829e-06
NUDT21	4	6.53e-06	2.74e-07	1.3e-05	99	4	-1.5531	0.99999	1	1	17974	0	-1.5531	6.5348e-06
CKAP5	4	6.75e-06	2.74e-07	1.3e-05	100	4	-1.0893	0.99999	1	1	17973	0	-1.0893	6.7491e-06
GNB2L1	4	7.09e-06	2.74e-07	1.3e-05	101	3	-1.4601	0.99825	1	1	17594	0	-1.4601	7.0922e-06
DHX15	4	7.17e-06	2.74e-07	1.3e-05	102	4	-1.8224	0.99941	1	1	17725	0	-1.8224	7.1665e-06
DUT	4	7.37e-06	2.74e-07	1.3e-05	103	3	-1.7747	0.67731	0.9091	1	11280	0	-1.7747
NEDD1	4	7.49e-06	2.74e-07	1.3e-05	104	4	-1.3974	0.99999	1	1	17971	0	-1.3974
CCT5	4	7.72e-06	2.74e-07	1.3e-05	105	4	-1.0917	0.99999	1	1	17970	0	-1.0917	7.7175e-06
CFL1	4	8.01e-06	2.74e-07	1.3e-05	106	4	-0.8987	0.99999	1	1	17969	0	-0.8987	8.0111e-06
RBM17	4	8.04e-06	2.74e-07	1.3e-05	107	4	-1.2725	0.99999	1	1	17968	0	-1.2725	8.0367e-06
DHX8	4	8.37e-06	2.74e-07	1.3e-05	108	4	-1.5906	0.99974	1	1	17788	0	-1.5906	8.3712e-06
SNW1	4	8.57e-06	2.74e-07	1.3e-05	109	4	-1.9136	0.9994	1	1	17723	0	-1.9136	8.5656e-06
STAT5B	4	8.59e-06	2.74e-07	1.3e-05	110	3	-1.6852	0.99847	1	1	17608	0	-1.6852
MYB	4	8.68e-06	2.74e-07	1.3e-05	111	4	-1.0054	0.99999	1	1	17966	0	-1.0054
SBDS	4	8.99e-06	2.74e-07	1.3e-05	112	4	-1.523	0.99945	1	1	17731	0	-1.523
IGLL5	4	9.28e-06	2.74e-07	1.3e-05	113	4	-1.1364	0.99999	1	1	17964	0	-1.1364
SUPT20H	4	9.47e-06	2.74e-07	1.3e-05	114	4	-0.96003	0.99999	1	1	17963	0	-0.96003
GUK1	4	9.64e-06	2.74e-07	1.3e-05	115	4	-1.7798	0.99973	1	1	17785	0	-1.7798	9.6429e-06
PPP6C	4	9.75e-06	2.74e-07	1.3e-05	116	4	-0.94343	0.99999	1	1	17962	0	-0.94343
GPN1	4	9.76e-06	2.74e-07	1.3e-05	117	4	-1.7787	0.99999	1	1	17961	0	-1.7787
GPX4	4	1.01e-05	2.74e-07	1.3e-05	118	3	-1.8583	0.99609	0.99998	1	17451	0	-1.8583
GRPEL1	4	1.07e-05	2.74e-07	1.3e-05	119	4	-1.3144	0.99999	1	1	17960	0	-1.3144	1.0672e-05
RRM1	4	1.08e-05	2.74e-07	1.3e-05	120	4	-2.0437	0.99999	1	1	17959	0	-2.0437	1.0821e-05
PRIM1	4	1.1e-05	2.74e-07	1.3e-05	121	4	-1.7336	0.99999	1	1	17958	0	-1.7336	1.0982e-05
POLA1	4	1.1e-05	2.74e-07	1.3e-05	122	4	-1.3047	0.99999	1	1	17957	0	-1.3047
SSU72	4	1.12e-05	2.74e-07	1.3e-05	123	4	-1.224	0.99999	1	1	17956	0	-1.224	1.1166e-05
TIMM44	4	1.12e-05	2.74e-07	1.3e-05	124	4	-1.0689	0.99999	1	1	17954	0	-1.0689	1.1232e-05
NUP85	4	1.13e-05	2.74e-07	1.3e-05	125	4	-1.5468	0.99999	1	1	17953	0	-1.5468	1.1254e-05
CENPW	4	1.21e-05	2.74e-07	1.3e-05	126	4	-1.5197	0.99994	1	1	17879	0	-1.5197
SYMPK	4	1.21e-05	2.74e-07	1.3e-05	127	4	-1.6626	0.99968	1	1	17767	0	-1.6626	1.213e-05
SNRPB	4	1.23e-05	2.74e-07	1.3e-05	128	3	-1.5012	0.99705	0.99998	1	17500	0	-1.5012
KPNB1	4	1.24e-05	2.74e-07	1.3e-05	129	4	-1.7547	0.99999	1	1	17951	0	-1.7547	1.2428e-05
MED30	4	1.26e-05	2.74e-07	1.3e-05	130	2	-1.5276	0.93219	0.99544	1	15791	0	-1.5276	1.2553e-05
TCP1	4	1.26e-05	2.74e-07	1.3e-05	131	4	-1.3123	0.99999	1	1	17950	0	-1.3123	1.2594e-05
CDC73	4	1.31e-05	2.74e-07	1.3e-05	132	4	-1.6477	0.99999	1	1	17949	0	-1.6477	1.3054e-05
POLR2H	4	1.34e-05	2.74e-07	1.3e-05	133	4	-1.3236	0.99999	1	1	17948	0	-1.3236	1.3363e-05
SPC25	4	1.36e-05	2.74e-07	1.3e-05	134	4	-1.5573	0.99996	1	1	17912	0	-1.5573	1.3595e-05
MED15	4	1.38e-05	2.74e-07	1.3e-05	135	4	-1.8039	0.99992	1	1	17872	0	-1.8039
NLE1	4	1.44e-05	2.74e-07	1.3e-05	136	4	-1.3426	0.99999	1	1	17947	0	-1.3426	1.4444e-05
ERH	4	1.45e-05	2.74e-07	1.3e-05	137	3	-1.6625	0.98907	0.99984	1	17142	0	-1.6625	1.4489e-05
KIAA1429	4	1.46e-05	2.74e-07	1.3e-05	138	3	-1.3488	0.92338	0.99431	1	15610	0	-1.3488
SMC4	4	1.5e-05	2.74e-07	1.3e-05	139	4	-1.2983	0.99999	1	1	17946	0	-1.2983	1.4994e-05
GBF1	4	1.52e-05	2.74e-07	1.3e-05	140	4	-1.2673	0.99998	1	1	17945	0	-1.2673
SMC3	4	1.52e-05	2.74e-07	1.3e-05	141	4	-1.5751	0.9997	1	1	17774	0	-1.5751
TBCD	4	1.57e-05	2.74e-07	1.3e-05	142	4	-0.94192	0.99998	1	1	17944	0	-0.94192	1.5687e-05
POLR3C	4	1.6e-05	2.74e-07	1.3e-05	143	4	-1.0375	0.99998	1	1	17943	0	-1.0375	1.5956e-05
SMC2	4	1.65e-05	2.74e-07	1.3e-05	144	3	-1.3783	0.14326	0.58451	1	4128	1	-1.3783	1.6477e-05
FAM230A	4	1.67e-05	2.74e-07	1.3e-05	145	4	-1.5348	0.99964	1	1	17761	0	-1.5348
ALDOA	4	1.68e-05	2.74e-07	1.3e-05	146	4	-1.8369	0.99997	1	1	17919	0	-1.8369
TOP3B	4	1.75e-05	2.74e-07	1.3e-05	147	4	-1.3812	0.99998	1	1	17942	0	-1.3812
WEE1	4	1.78e-05	2.74e-07	1.3e-05	148	3	-1.8908	0.93334	0.99544	1	15812	0	-1.8908	1.7762e-05
CDC6	4	1.78e-05	2.74e-07	1.3e-05	149	4	-1.485	0.99998	1	1	17941	0	-1.485
CHKA	4	1.79e-05	2.74e-07	1.3e-05	150	4	-1.1674	0.99998	1	1	17940	0	-1.1674
NARFL	4	1.88e-05	2.74e-07	1.3e-05	151	4	-1.3536	0.99998	1	1	17939	0	-1.3536	1.8811e-05
PRMT1	4	1.89e-05	2.74e-07	1.3e-05	152	4	-1.0347	0.99998	1	1	17938	0	-1.0347	1.886e-05
TMED10	4	1.91e-05	2.74e-07	1.3e-05	153	3	-1.8799	0.99327	0.99988	1	17301	0	-1.8799
SCYL1	4	1.93e-05	2.74e-07	1.3e-05	154	4	-0.90204	0.99998	1	1	17937	0	-0.90204
UBA3	4	1.96e-05	2.74e-07	1.3e-05	155	4	-1.0905	0.99998	1	1	17936	0	-1.0905
SYNCRIP	4	1.96e-05	2.74e-07	1.3e-05	156	4	-0.94101	0.99998	1	1	17935	0	-0.94101
PSMB1	4	2e-05	2.74e-07	1.3e-05	157	4	-1.5537	0.99998	1	1	17934	0	-1.5537	1.9967e-05
THOC5	4	2.06e-05	2.74e-07	1.3e-05	158	4	-0.99371	0.99998	1	1	17933	0	-0.99371	2.0633e-05
POLD3	4	2.07e-05	2.74e-07	1.3e-05	159	3	-1.5963	0.99323	0.99988	1	17299	0	-1.5963
FAM50A	4	2.09e-05	2.74e-07	1.3e-05	160	4	-0.88178	0.99998	1	1	17932	0	-0.88178
KIF11	4	2.14e-05	2.74e-07	1.3e-05	161	4	-1.5482	0.99998	1	1	17931	0	-1.5482	2.1405e-05
CDC123	4	2.16e-05	2.74e-07	1.3e-05	162	4	-1.263	0.99957	1	1	17745	0	-1.263	2.1647e-05
RABGGTB	4	2.24e-05	2.74e-07	1.3e-05	163	4	-1.3644	0.99998	1	1	17930	0	-1.3644	2.2399e-05
SDF2L1	4	2.28e-05	2.74e-07	1.3e-05	164	4	-0.92663	0.99998	1	1	17929	0	-0.92663
POLR2D	3	2.36e-05	2.74e-07	1.3e-05	165	3	-1.5685	0.99998	1	1	17928	0	-1.5685	2.3592e-05
COPS5	4	2.41e-05	2.74e-07	1.3e-05	166	3	-1.1967	0.82564	0.97235	1	13817	0	-1.1967
EEF2	4	2.42e-05	2.74e-07	1.3e-05	167	2	-1.2804	0.7542	0.9535	1	12546	0	-1.2804	2.4243e-05
VPS25	4	2.77e-05	2.74e-07	1.3e-05	168	4	-1.3871	0.99932	1	1	17709	0	-1.3871	2.7671e-05
CCDC84	4	2.87e-05	2.74e-07	1.3e-05	169	4	-1.1259	0.99997	1	1	17927	0	-1.1259	2.867e-05
FNTB	4	2.92e-05	2.74e-07	1.3e-05	170	4	-0.78986	0.99997	1	1	17926	0	-0.78986	2.9183e-05
RUVBL1	4	2.93e-05	2.74e-07	1.3e-05	171	4	-1.3978	0.99997	1	1	17925	0	-1.3978
LSM7	4	2.96e-05	2.74e-07	1.3e-05	172	4	-1.051	0.99997	1	1	17924	0	-1.051	2.9611e-05
PPM1F	4	2.96e-05	2.74e-07	1.3e-05	173	4	-1.3278	0.99997	1	1	17923	0	-1.3278
POLR2E	4	2.97e-05	2.74e-07	1.3e-05	174	3	-1.6387	0.44627	0.82117	1	7997	1	-1.6387	2.9668e-05
COX5B	4	2.97e-05	2.74e-07	1.3e-05	175	4	-1.0239	0.99997	1	1	17922	0	-1.0239	2.9679e-05
PSMC1	4	2.98e-05	2.74e-07	1.3e-05	176	4	-1.3314	0.99943	1	1	17727	0	-1.3314
POLR3B	4	3.09e-05	2.74e-07	1.3e-05	177	3	-1.5782	0.98077	0.99962	1	16887	0	-1.5782
NAA25	4	3.13e-05	2.74e-07	1.3e-05	178	4	-1.2069	0.99997	1	1	17921	0	-1.2069
BUB3	4	3.22e-05	2.74e-07	1.3e-05	179	4	-1.0191	0.99997	1	1	17920	0	-1.0191	3.2162e-05
FTSJ3	4	3.32e-05	2.74e-07	1.3e-05	180	4	-1.1428	0.99994	1	1	17883	0	-1.1428	3.3249e-05
SMG7	4	3.33e-05	2.74e-07	1.3e-05	181	4	-1.6402	0.99891	1	1	17654	0	-1.6402
TAZ	4	3.38e-05	2.74e-07	1.3e-05	182	4	-1.2298	0.99997	1	1	17918	0	-1.2298
EIF2B5	4	3.4e-05	2.74e-07	1.3e-05	183	4	-0.85568	0.99997	1	1	17917	0	-0.85568	3.4035e-05
ATP6V1C1	4	3.42e-05	2.74e-07	1.3e-05	184	4	-0.78932	0.99997	1	1	17916	0	-0.78932
OXA1L	4	3.47e-05	2.74e-07	1.3e-05	185	4	-0.80145	0.99997	1	1	17915	0	-0.80145
NAA50	4	3.6e-05	2.74e-07	1.3e-05	186	4	-1.0809	0.99996	1	1	17914	0	-1.0809	3.6042e-05
RPL23	4	3.63e-05	2.74e-07	1.3e-05	187	3	-0.87888	0.96966	0.9989	1	16593	0	-0.87888	3.6297e-05
ANAPC2	4	3.64e-05	2.74e-07	1.3e-05	188	3	-1.7535	0.65815	0.90436	1	10985	0	-1.7535	3.6443e-05
RRN3	4	3.72e-05	2.74e-07	1.3e-05	189	3	-1.6591	0.78029	0.95625	1	13011	0	-1.6591
NFE2	4	3.76e-05	2.74e-07	1.3e-05	190	4	-1.0946	0.99996	1	1	17913	0	-1.0946
VPS28	4	3.82e-05	2.74e-07	1.3e-05	191	4	-1.4255	0.99996	1	1	17911	0	-1.4255	3.8163e-05
ARIH1	4	3.83e-05	2.74e-07	1.3e-05	192	4	-0.87912	0.99996	1	1	17910	0	-0.87912	3.8273e-05
RFC3	4	3.84e-05	2.74e-07	1.3e-05	193	4	-1.1474	0.99996	1	1	17909	0	-1.1474
SART3	4	3.87e-05	2.74e-07	1.3e-05	194	3	-1.2477	0.99521	0.99995	1	17403	0	-1.2477	3.8682e-05
RC3H1	4	3.89e-05	2.74e-07	1.3e-05	195	4	-1.1509	0.99996	1	1	17908	0	-1.1509
BUD31	4	3.98e-05	2.74e-07	1.3e-05	196	3	-1.68	0.93178	0.99544	1	15782	0	-1.68	3.9835e-05
MBTD1	4	4.1e-05	2.74e-07	1.3e-05	197	4	-0.71847	0.99996	1	1	17906	0	-0.71847
RTDR1	4	4.16e-05	2.74e-07	1.3e-05	198	4	-0.92866	0.99996	1	1	17905	0	-0.92866
HMGCS1	4	4.18e-05	2.74e-07	1.3e-05	199	4	-1.373	0.99996	1	1	17904	0	-1.373
COPS6	4	4.33e-05	2.74e-07	1.3e-05	200	3	-1.587	0.97548	0.9992	1	16755	0	-1.587	4.3347e-05
SPAG5	4	4.41e-05	2.74e-07	1.3e-05	201	4	-0.82884	0.99996	1	1	17903	0	-0.82884
ARCN1	4	4.42e-05	2.74e-07	1.3e-05	202	3	-1.2449	0.99831	1	1	17598	0	-1.2449	4.4173e-05
GCN1L1	4	4.47e-05	2.74e-07	1.3e-05	203	4	-0.92218	0.99996	1	1	17902	0	-0.92218
TIMELESS	4	4.51e-05	2.74e-07	1.3e-05	204	3	-1.8435	0.85799	0.98085	1	14431	0	-1.8435
THOC1	4	4.54e-05	2.74e-07	1.3e-05	205	4	-0.92379	0.99995	1	1	17901	0	-0.92379
PRODH	4	4.63e-05	2.74e-07	1.3e-05	206	4	-0.77992	0.99995	1	1	17900	0	-0.77992
ZFC3H1	4	4.63e-05	2.74e-07	1.3e-05	207	4	-0.97694	0.99995	1	1	17899	0	-0.97694
FAM210A	4	4.7e-05	2.74e-07	1.3e-05	208	4	-0.69219	0.99995	1	1	17898	0	-0.69219
UBE2S	4	4.75e-05	2.74e-07	1.3e-05	209	4	-1.0577	0.99995	1	1	17897	0	-1.0577
CDC45	4	4.91e-05	2.74e-07	1.3e-05	210	4	-1.0413	0.99995	1	1	17896	0	-1.0413
CCT7	4	4.94e-05	2.74e-07	1.3e-05	211	4	-1.4051	0.99962	1	1	17755	0	-1.4051	4.9438e-05
YEATS4	4	5.03e-05	2.74e-07	1.3e-05	212	4	-0.80365	0.99995	1	1	17895	0	-0.80365
BRF2	4	5.11e-05	2.74e-07	1.3e-05	213	3	-1.2955	0.34212	0.74783	1	6912	1	-1.2955
COPE	4	5.23e-05	2.74e-07	1.3e-05	214	4	-1.0377	0.99995	1	1	17894	0	-1.0377
PAFAH1B1	4	5.34e-05	2.74e-07	1.3e-05	215	4	-1.151	0.99985	1	1	17837	0	-1.151	5.3388e-05
ATP6V0C	4	5.43e-05	2.74e-07	1.3e-05	216	4	-1.0906	0.99995	1	1	17893	0	-1.0906	5.4305e-05
IGBP1	4	5.46e-05	2.74e-07	1.3e-05	217	4	-1.0248	0.99995	1	1	17892	0	-1.0248	5.4556e-05
TSC2	4	5.46e-05	2.74e-07	1.3e-05	218	4	-0.94904	0.99995	1	1	17891	0	-0.94904
INTS4	4	5.5e-05	2.74e-07	1.3e-05	219	4	-1.2875	0.99991	1	1	17864	0	-1.2875
DDB1	4	5.51e-05	2.74e-07	1.3e-05	220	4	-0.87907	0.99994	1	1	17890	0	-0.87907	5.5096e-05
WDR70	4	5.52e-05	2.74e-07	1.3e-05	221	4	-1.0726	0.99994	1	1	17889	0	-1.0726	5.5204e-05
KMT2A	4	5.62e-05	2.74e-07	1.3e-05	222	3	-1.3228	0.99832	1	1	17600	0	-1.3228
CDC27	4	5.64e-05	2.74e-07	1.3e-05	223	3	-1.4089	0.79797	0.96388	1	13355	0	-1.4089	5.6363e-05
BANF1	4	5.64e-05	2.74e-07	1.3e-05	224	4	-1.5869	0.99994	1	1	17887	0	-1.5869	5.6445e-05
HAUS6	4	5.68e-05	2.74e-07	1.3e-05	225	3	-1.4193	0.026319	0.26694	1	1387	1	-1.4193
AFG3L2	4	5.69e-05	2.74e-07	1.3e-05	226	4	-1.195	0.99992	1	1	17870	0	-1.195
RNF4	4	5.72e-05	2.74e-07	1.3e-05	227	3	-1.0599	0.99602	0.99997	1	17447	0	-1.0599
RBM39	4	5.85e-05	2.74e-07	1.3e-05	228	2	-1.106	0.68389	0.91818	1	11388	0	-1.106
RPSA	4	5.85e-05	2.74e-07	1.3e-05	229	4	-0.60518	0.99994	1	1	17886	0	-0.60518
THAP1	4	5.87e-05	2.74e-07	1.3e-05	230	3	-1.7625	0.83557	0.9742	1	13990	0	-1.7625
RAD17	4	5.95e-05	2.74e-07	1.3e-05	231	4	-0.89525	0.99994	1	1	17885	0	-0.89525
MAT2A	4	5.98e-05	2.74e-07	1.3e-05	232	4	-1.0371	0.99994	1	1	17884	0	-1.0371
SUGP1	4	6.01e-05	2.74e-07	1.3e-05	233	4	-0.87603	0.99994	1	1	17882	0	-0.87603
ZNRD1	4	6.06e-05	2.74e-07	1.3e-05	234	3	-1.0013	0.26314	0.71148	1	6139	1	-1.0013
ORAOV1	4	6.14e-05	2.74e-07	1.3e-05	235	3	-1.2412	0.99747	0.99999	1	17527	0	-1.2412	6.1388e-05
BCR	4	6.22e-05	2.74e-07	1.3e-05	236	3	-1.7167	0.7521	0.9535	1	12513	0	-1.7167
SF3A1	4	6.24e-05	2.74e-07	1.3e-05	237	4	-1.1663	0.99994	1	1	17880	0	-1.1663
SMCHD1	4	6.33e-05	2.74e-07	1.3e-05	238	4	-1.5751	0.99913	1	1	17687	0	-1.5751
NUF2	4	6.39e-05	2.74e-07	1.3e-05	239	4	-1.4295	0.99993	1	1	17874	0	-1.4295	6.3901e-05
BRD8	4	6.43e-05	2.74e-07	1.3e-05	240	3	-1.4248	0.10381	0.50035	1	3305	1	-1.4248
HEATR1	4	6.5e-05	2.74e-07	1.3e-05	241	3	-1.3521	0.99829	1	1	17597	0	-1.3521	6.4969e-05
SKA3	4	6.73e-05	2.74e-07	1.3e-05	242	4	-1.1555	0.99993	1	1	17878	0	-1.1555
ATR	4	6.78e-05	2.74e-07	1.3e-05	243	3	-1.3263	0.68398	0.91818	1	11392	0	-1.3263	6.7787e-05
DYNC1H1	4	6.84e-05	2.74e-07	1.3e-05	244	3	-1.4232	0.97866	0.99962	1	16819	0	-1.4232
GPS1	4	6.89e-05	2.74e-07	1.3e-05	245	3	-1.2938	0.84331	0.97771	1	14155	0	-1.2938	6.8926e-05
INTS5	4	7.13e-05	2.74e-07	1.3e-05	246	4	-0.86516	0.99993	1	1	17876	0	-0.86516
PNN	4	7.31e-05	2.74e-07	1.3e-05	247	4	-1.0348	0.99993	1	1	17875	0	-1.0348
QARS	4	7.42e-05	2.74e-07	1.3e-05	248	4	-1.3392	0.99884	1	1	17645	0	-1.3392	7.4168e-05
LIMS1	4	7.66e-05	2.74e-07	1.3e-05	249	4	-0.99652	0.99992	1	1	17873	0	-0.99652
SUPT5H	4	7.75e-05	2.74e-07	1.3e-05	250	3	-1.1788	0.54203	0.863	1	9204	1	-1.1788	7.7497e-05
COMT	4	8.14e-05	2.74e-07	1.3e-05	251	4	-1.4225	0.99992	1	1	17871	0	-1.4225
DMAP1	4	8.2e-05	2.74e-07	1.3e-05	252	4	-0.62952	0.99992	1	1	17869	0	-0.62952	8.1974e-05
MED12	4	8.25e-05	2.74e-07	1.3e-05	253	4	-1.4671	0.99976	1	1	17801	0	-1.4671	8.2546e-05
EIF3D	4	8.31e-05	2.74e-07	1.3e-05	254	4	-1.3784	0.99965	1	1	17763	0	-1.3784	8.305e-05
EXOSC7	4	8.57e-05	2.74e-07	1.3e-05	255	3	-1.3229	0.99725	0.99999	1	17514	0	-1.3229	8.573e-05
CSNK2B	4	8.73e-05	2.74e-07	1.3e-05	256	4	-1.2764	0.99971	1	1	17778	0	-1.2764
ARL2	4	8.8e-05	2.74e-07	1.3e-05	257	4	-0.87924	0.99991	1	1	17868	0	-0.87924	8.8025e-05
PES1	4	8.94e-05	2.74e-07	1.3e-05	258	4	-0.89321	0.99991	1	1	17867	0	-0.89321
PMPCA	4	9.03e-05	2.74e-07	1.3e-05	259	4	-1.0411	0.99991	1	1	17866	0	-1.0411	9.0253e-05
FARSB	4	9.27e-05	2.74e-07	1.3e-05	260	4	-0.81062	0.99991	1	1	17865	0	-0.81062	9.2684e-05
NUP133	4	9.41e-05	2.74e-07	1.3e-05	261	4	-1.3787	0.99991	1	1	17863	0	-1.3787	9.4133e-05
ZNF407	4	9.48e-05	2.74e-07	1.3e-05	262	4	-1.0774	0.99991	1	1	17862	0	-1.0774
CWC22	4	9.72e-05	2.74e-07	1.3e-05	263	4	-0.92047	0.9999	1	1	17861	0	-0.92047
ESPL1	4	9.86e-05	2.74e-07	1.3e-05	264	3	-1.3995	0.87502	0.98593	1	14725	0	-1.3995
MED14	4	0.00010214	2.74e-07	1.3e-05	265	4	-1.5503	0.99983	1	1	17829	0	-1.5503
KAT2A	4	0.00010576	2.74e-07	1.3e-05	266	4	-0.69228	0.99989	1	1	17860	0	-0.69228
PCYT2	4	0.00010611	2.74e-07	1.3e-05	267	4	-0.83064	0.99989	1	1	17859	0	-0.83064
SYS1	4	0.00010641	2.74e-07	1.3e-05	268	4	-1.2161	0.99989	1	1	17858	0	-1.2161	0.00010641
FIBCD1	4	0.00010655	2.74e-07	1.3e-05	269	3	-1.4881	0.4148	0.77406	1	7649	1	-1.4881
POLR2C	4	0.00011104	2.74e-07	1.3e-05	270	4	-1.3362	0.99989	1	1	17857	0	-1.3362	0.00011104
DOT1L	4	0.0001119	2.74e-07	1.3e-05	271	4	-1.11	0.99989	1	1	17856	0	-1.11
FAM134C	4	0.00011233	2.74e-07	1.3e-05	272	4	-0.71024	0.99989	1	1	17855	0	-0.71024
DTL	4	0.00011354	2.74e-07	1.3e-05	273	3	-1.3782	0.99028	0.99984	1	17182	0	-1.3782	0.00011354
RPL3	4	0.00011432	2.74e-07	1.3e-05	274	4	-1.0123	0.99989	1	1	17854	0	-1.0123	0.00011432
MTX1	4	0.00011532	2.74e-07	1.3e-05	275	4	-0.9112	0.99988	1	1	17853	0	-0.9112
TRAPPC11	4	0.00011845	2.74e-07	1.3e-05	276	4	-0.96496	0.99892	1	1	17656	0	-0.96496
RABGGTA	4	0.00012019	2.74e-07	1.3e-05	277	3	-1.3101	0.9049	0.9917	1	15257	0	-1.3101
POLE2	4	0.00012148	2.74e-07	1.3e-05	278	4	-1.2112	0.99905	1	1	17673	0	-1.2112
COPZ1	4	0.00012292	2.74e-07	1.3e-05	279	4	-0.76702	0.99988	1	1	17852	0	-0.76702	0.00012292
COX10	4	0.00012391	2.74e-07	1.3e-05	280	4	-0.79072	0.99988	1	1	17851	0	-0.79072	0.00012391
MTCH2	4	0.00012538	2.74e-07	1.3e-05	281	4	-0.80104	0.99987	1	1	17850	0	-0.80104
NPLOC4	4	0.00012686	2.74e-07	1.3e-05	282	4	-0.90821	0.99987	1	1	17849	0	-0.90821	0.00012686
ATP13A1	4	0.00012699	2.74e-07	1.3e-05	283	4	-1.0341	0.99987	1	1	17848	0	-1.0341
LYRM4	4	0.00012759	2.74e-07	1.3e-05	284	4	-0.82944	0.99973	1	1	17787	0	-0.82944
SARS	4	0.00012767	2.74e-07	1.3e-05	285	4	-1.0966	0.99987	1	1	17847	0	-1.0966	0.00012767
TADA2B	4	0.00012774	2.74e-07	1.3e-05	286	4	-1.2326	0.99987	1	1	17846	0	-1.2326
NAIP	4	0.00012814	2.74e-07	1.3e-05	287	4	-0.7826	0.99987	1	1	17845	0	-0.7826
RFC5	4	0.00013114	2.74e-07	1.3e-05	288	3	-1.166	0.96688	0.99851	1	16521	0	-1.166	0.00013114
TONSL	4	0.00013283	2.74e-07	1.3e-05	289	4	-0.82094	0.99987	1	1	17844	0	-0.82094	0.00013283
TIMM13	4	0.00013473	2.74e-07	1.3e-05	290	4	-1.181	0.99987	1	1	17843	0	-1.181	0.00013473
ARF6	4	0.00013581	2.74e-07	1.3e-05	291	4	-1.146	0.99977	1	1	17805	0	-1.146
AURKA	4	0.00013722	2.74e-07	1.3e-05	292	4	-1.3001	0.99986	1	1	17842	0	-1.3001
RAD1	4	0.00013772	2.74e-07	1.3e-05	293	4	-0.80428	0.99986	1	1	17841	0	-0.80428
GPKOW	4	0.00013809	2.74e-07	1.3e-05	294	3	-1.3907	0.99579	0.99995	1	17431	0	-1.3907
COPB1	4	0.0001413	2.74e-07	1.3e-05	295	3	-1.4484	0.78228	0.95889	1	13051	0	-1.4484	0.0001413
EIF4A3	4	0.00014356	2.74e-07	1.3e-05	296	4	-1.335	0.99986	1	1	17840	0	-1.335	0.00014356
MCM4	4	0.00014419	2.74e-07	1.3e-05	297	3	-1.0434	0.76453	0.95625	1	12725	0	-1.0434	0.00014419
CPSF3	4	0.00014474	2.74e-07	1.3e-05	298	3	-1.1394	0.92442	0.99431	1	15624	0	-1.1394	0.00014474
DDX55	4	0.00014685	2.74e-07	1.3e-05	299	4	-0.72354	0.99985	1	1	17839	0	-0.72354	0.00014685
SCFD1	4	0.00014692	2.74e-07	1.3e-05	300	3	-1.25	0.61284	0.88907	1	10240	1	-1.25
NARS	4	0.00014934	2.74e-07	1.3e-05	301	4	-1.1395	0.99905	1	1	17674	0	-1.1395	0.00014934
RPS19	3	0.00014938	2.74e-07	1.3e-05	302	3	-1.2021	0.99985	1	1	17838	0	-1.2021	0.00014938
QRFP	4	0.0001514	2.74e-07	1.3e-05	303	4	-1.226	0.99982	1	1	17827	0	-1.226
HNRNPU	4	0.00015272	2.74e-07	1.3e-05	304	3	-1.2158	0.4791	0.84216	1	8386	1	-1.2158	0.00015272
SF3A3	4	0.00015289	2.74e-07	1.3e-05	305	4	-1.1679	0.99985	1	1	17836	0	-1.1679	0.00015289
CDC20	4	0.00015442	2.74e-07	1.3e-05	306	3	-1.4093	0.9861	0.99981	1	17047	0	-1.4093	0.00015442
GLE1	4	0.00015499	2.74e-07	1.3e-05	307	3	-1.2907	0.99792	1	1	17564	0	-1.2907
TARS	4	0.00015595	2.74e-07	1.3e-05	308	3	-1.0391	0.99472	0.99988	1	17375	0	-1.0391	0.00015595
XRCC6	4	0.00015682	2.74e-07	1.3e-05	309	4	-0.56149	0.99984	1	1	17835	0	-0.56149	0.00015682
DDX24	4	0.00015713	2.74e-07	1.3e-05	310	4	-1.0247	0.99984	1	1	17834	0	-1.0247
CLPX	4	0.00015769	2.74e-07	1.3e-05	311	4	-0.65797	0.99984	1	1	17833	0	-0.65797
SUPT4H1	4	0.00016009	2.74e-07	1.3e-05	312	4	-1.4239	0.99984	1	1	17831	0	-1.4239
NUP98	4	0.00016433	2.74e-07	1.3e-05	313	4	-1.3887	0.99937	1	1	17720	0	-1.3887
DRD5	4	0.00016453	2.74e-07	1.3e-05	314	3	-1.5059	0.99772	1	1	17549	0	-1.5059
SLC7A6OS	4	0.00016472	2.74e-07	1.3e-05	315	4	-0.97703	0.99984	1	1	17830	0	-0.97703
THAP11	4	0.00016532	2.74e-07	1.3e-05	316	3	-1.6002	0.99878	1	1	17636	0	-1.6002
PSMA4	4	0.00016612	2.74e-07	1.3e-05	317	3	-1.6525	0.99307	0.99988	1	17292	0	-1.6525	0.00016612
NACC1	4	0.00016853	2.74e-07	1.3e-05	318	4	-1.0326	0.99966	1	1	17764	0	-1.0326
NUTF2	4	0.00017035	2.74e-07	1.3e-05	319	3	-1.2966	0.97204	0.99906	1	16652	0	-1.2966	0.00017035
DNAJC17	4	0.00017412	2.74e-07	1.3e-05	320	4	-0.90341	0.99983	1	1	17828	0	-0.90341
RTN4R	4	0.00017479	2.74e-07	1.3e-05	321	3	-1.6107	0.9988	1	1	17640	0	-1.6107
HAUS8	4	0.00017547	2.74e-07	1.3e-05	322	3	-1.1568	0.99368	0.99988	1	17320	0	-1.1568
EXOSC4	4	0.00017944	2.74e-07	1.3e-05	323	3	-1.2719	0.9981	1	1	17584	0	-1.2719	0.00017944
EED	4	0.00017986	2.74e-07	1.3e-05	324	4	-1.3486	0.99982	1	1	17825	0	-1.3486
BHLHE40	4	0.00018355	2.74e-07	1.3e-05	325	4	-0.83558	0.99982	1	1	17826	0	-0.83558
SMARCD1	4	0.00018588	2.74e-07	1.3e-05	326	4	-0.75519	0.99981	1	1	17824	0	-0.75519
SHFM1	4	0.00018773	2.74e-07	1.3e-05	327	3	-1.2059	0.67006	0.9091	1	11167	0	-1.2059
GATA1	4	0.00018797	2.74e-07	1.3e-05	328	4	-1.3812	0.99969	1	1	17771	0	-1.3812
SNAPC2	4	0.00018949	2.74e-07	1.3e-05	329	3	-1.1952	0.99726	0.99999	1	17515	0	-1.1952	0.00018949
ARGLU1	4	0.00018987	2.74e-07	1.3e-05	330	4	-0.8615	0.99981	1	1	17823	0	-0.8615
SYVN1	4	0.00019168	2.74e-07	1.3e-05	331	3	-1.1087	0.98809	0.99981	1	17105	0	-1.1087
PHB2	4	0.00019256	2.74e-07	1.3e-05	332	4	-1.5278	0.99979	1	1	17813	0	-1.5278	0.00019256
MAPK1	4	0.00019541	2.74e-07	1.3e-05	333	4	-0.80423	0.9998	1	1	17822	0	-0.80423
WDR33	4	0.00019719	2.74e-07	1.3e-05	334	4	-1.0473	0.9998	1	1	17821	0	-1.0473	0.00019719
PRPF8	4	0.00019744	2.74e-07	1.3e-05	335	4	-1.6754	0.99975	1	1	17798	0	-1.6754	0.00019744
RPL13	3	0.00019903	2.74e-07	1.3e-05	336	3	-0.93624	0.9998	1	1	17820	0	-0.93624	0.00019903
LAMC3	4	0.00020041	2.74e-07	1.3e-05	337	4	-0.75358	0.9998	1	1	17819	0	-0.75358
ALG2	4	0.00020088	2.74e-07	1.3e-05	338	4	-1.0496	0.9998	1	1	17818	0	-1.0496	0.00020088
MTX2	4	0.00020127	2.74e-07	1.3e-05	339	3	-0.90957	0.76515	0.95625	1	12740	0	-0.90957
SEL1L	4	0.00020472	2.74e-07	1.3e-05	340	4	-1.1056	0.9998	1	1	17817	0	-1.1056
PSMB2	4	0.00020505	2.74e-07	1.3e-05	341	3	-1.6527	0.93882	0.99591	1	15918	0	-1.6527	0.00020505
EIF3E	4	0.00020511	2.74e-07	1.3e-05	342	4	-0.82457	0.99979	1	1	17816	0	-0.82457
PPP2R2A	4	0.00021069	2.74e-07	1.3e-05	343	4	-1.1411	0.99979	1	1	17814	0	-1.1411
RBX1	4	0.00022064	8.23e-07	3.2e-05	344	4	-1.0747	0.99978	1	1	17812	0	-1.0747	0.00022064
MIEF1	4	0.00022197	8.23e-07	3.2e-05	345	4	-0.66461	0.99978	1	1	17811	0	-0.66461
LSM3	4	0.00022284	8.23e-07	3.2e-05	346	4	-1.0208	0.99968	1	1	17769	0	-1.0208
DHDDS	4	0.00022352	8.23e-07	3.2e-05	347	4	-1.0468	0.99978	1	1	17810	0	-1.0468
CDC7	4	0.00022414	8.23e-07	3.2e-05	348	4	-0.87005	0.99978	1	1	17809	0	-0.87005
LAGE3	4	0.00022772	8.23e-07	3.2e-05	349	4	-1.3149	0.99934	1	1	17713	0	-1.3149
SRP19	4	0.0002281	8.23e-07	3.2e-05	350	4	-0.98155	0.99977	1	1	17808	0	-0.98155	0.0002281
EIF2S1	4	0.00022828	8.23e-07	3.2e-05	351	2	-1.1371	0.12009	0.54788	1	3662	1	-1.1371	0.00022828
SUZ12	4	0.00023044	8.23e-07	3.2e-05	352	3	-1.0289	0.98471	0.99975	1	17002	0	-1.0289
MED8	4	0.00023211	8.23e-07	3.2e-05	353	4	-0.58941	0.99977	1	1	17807	0	-0.58941
ANAPC1	4	0.00023318	8.23e-07	3.2e-05	354	3	-1.6515	0.12255	0.55472	1	3717	1	-1.6515
PPP2R3C	4	0.00023445	8.23e-07	3.2e-05	355	4	-1.2124	0.99977	1	1	17806	0	-1.2124
TIMM23	4	0.00023669	8.23e-07	3.2e-05	356	3	-1.0855	0.99837	1	1	17603	0	-1.0855	0.00023669
AP2S1	4	0.00023887	8.23e-07	3.2e-05	357	4	-0.87379	0.99976	1	1	17804	0	-0.87379
POLR1A	4	0.0002392	8.23e-07	3.2e-05	358	4	-1.0037	0.99976	1	1	17803	0	-1.0037	0.0002392
GPN2	4	0.00023996	8.23e-07	3.2e-05	359	4	-0.9744	0.99976	1	1	17802	0	-0.9744
TBCA	4	0.000241	8.23e-07	3.2e-05	360	3	-1.364	0.99475	0.99988	1	17378	0	-1.364
ABCE1	4	0.00024302	8.23e-07	3.2e-05	361	4	-1.3521	0.99926	1	1	17697	0	-1.3521	0.00024302
CCAR1	4	0.00024325	8.23e-07	3.2e-05	362	4	-0.91091	0.99976	1	1	17800	0	-0.91091
SART1	4	0.00024347	8.23e-07	3.2e-05	363	4	-0.75272	0.99976	1	1	17799	0	-0.75272
CHERP	4	0.00024357	8.23e-07	3.2e-05	364	3	-1.154	0.90822	0.9917	1	15317	0	-1.154	0.00024357
PPP1CA	4	0.00024434	8.23e-07	3.2e-05	365	3	-0.93469	0.99722	0.99999	1	17511	0	-0.93469
POLR3H	4	0.00024679	8.23e-07	3.2e-05	366	4	-1.2156	0.99975	1	1	17797	0	-1.2156	0.00024679
TPT1	4	0.00024935	8.23e-07	3.2e-05	367	4	-0.82711	0.99975	1	1	17796	0	-0.82711	0.00024935
VCP	4	0.00024992	8.23e-07	3.2e-05	368	4	-1.0748	0.99975	1	1	17795	0	-1.0748	0.00024992
ZBTB11	4	0.00025025	8.23e-07	3.2e-05	369	4	-0.98963	0.99975	1	1	17794	0	-0.98963
EXOSC8	4	0.00025426	8.23e-07	3.2e-05	370	3	-1.0898	0.99835	1	1	17602	0	-1.0898	0.00025426
NOL11	4	0.00025444	8.23e-07	3.2e-05	371	4	-1.0119	0.99975	1	1	17793	0	-1.0119	0.00025444
RPN1	4	0.00025824	8.23e-07	3.2e-05	372	3	-1.3086	0.99854	1	1	17616	0	-1.3086
CSNK1A1	4	0.00025995	8.23e-07	3.2e-05	373	4	-0.6804	0.99974	1	1	17792	0	-0.6804
EIF5AL1	3	0.00026102	2.74e-07	1.3e-05	374	3	-1.2291	0.99974	1	1	17791	0	-1.2291
RTEL1	4	0.00026154	8.23e-07	3.2e-05	375	3	-1.3497	0.98405	0.99969	1	16974	0	-1.3497
ABCB7	4	0.00026203	8.23e-07	3.2e-05	376	4	-0.94395	0.99974	1	1	17790	0	-0.94395
HUWE1	4	0.00026215	8.23e-07	3.2e-05	377	4	-0.81044	0.99974	1	1	17789	0	-0.81044	0.00026215
TFIP11	4	0.00026281	8.23e-07	3.2e-05	378	3	-1.1034	0.99466	0.99988	1	17368	0	-1.1034
DNAJC19	3	0.00026659	2.74e-07	1.3e-05	379	2	-1.1681	0.8179	0.96845	1	13680	0	-1.1681
P2RX6	4	0.00027238	8.23e-07	3.2e-05	380	4	-1.0138	0.99947	1	1	17733	0	-1.0138
HINFP	4	0.00027242	8.23e-07	3.2e-05	381	4	-0.89124	0.99973	1	1	17786	0	-0.89124	0.00027242
SMG5	4	0.00027349	8.23e-07	3.2e-05	382	3	-1.3036	0.88557	0.98906	1	14925	0	-1.3036
HAUS3	4	0.00027483	8.23e-07	3.2e-05	383	4	-0.84603	0.99973	1	1	17784	0	-0.84603
SNRPD1	4	0.00027488	8.23e-07	3.2e-05	384	3	-1.1151	0.53117	0.863	1	9063	1	-1.1151	0.00027488
ISG20L2	4	0.00027592	8.23e-07	3.2e-05	385	4	-1.0484	0.99972	1	1	17783	0	-1.0484	0.00027592
NEDD8	3	0.0002769	2.74e-07	1.3e-05	386	3	-0.97661	0.99972	1	1	17782	0	-0.97661	0.0002769
PUF60	4	0.00027795	8.23e-07	3.2e-05	387	3	-1.3009	0.98822	0.99981	1	17111	0	-1.3009	0.00027795
MARS	4	0.00028288	8.23e-07	3.2e-05	388	4	-0.5657	0.99972	1	1	17781	0	-0.5657	0.00028288
CSNK2A2	4	0.00028303	8.23e-07	3.2e-05	389	3	-0.92028	0.99568	0.99995	1	17425	0	-0.92028
TAMM41	4	0.0002846	8.23e-07	3.2e-05	390	4	-0.60428	0.99972	1	1	17780	0	-0.60428
NUP155	4	0.00029135	8.23e-07	3.2e-05	391	4	-0.83444	0.99971	1	1	17779	0	-0.83444	0.00029135
NRF1	4	0.00029413	8.23e-07	3.2e-05	392	4	-1.1486	0.99971	1	1	17777	0	-1.1486
USP37	4	0.00029898	8.23e-07	3.2e-05	393	4	-0.77544	0.9997	1	1	17776	0	-0.77544
CDC23	4	0.00029942	8.23e-07	3.2e-05	394	2	-1.2889	0.96885	0.9989	1	16579	0	-1.2889
EEF1A1	3	0.00030384	2.74e-07	1.3e-05	395	3	-1.8805	0.9997	1	1	17775	0	-1.8805
DGCR8	4	0.00030454	8.23e-07	3.2e-05	396	4	-1.0871	0.9997	1	1	17773	0	-1.0871	0.00030454
AKIRIN2	4	0.00030913	8.23e-07	3.2e-05	397	4	-1.0681	0.99969	1	1	17772	0	-1.0681
RAD9A	4	0.00031815	8.23e-07	3.2e-05	398	3	-1.3241	0.22583	0.66436	1	5809	1	-1.3241
IMP3	4	0.00031845	8.23e-07	3.2e-05	399	4	-0.89241	0.99968	1	1	17770	0	-0.89241	0.00031845
ANAPC11	4	0.00032021	8.23e-07	3.2e-05	400	4	-1.0538	0.99968	1	1	17768	0	-1.0538
MED21	4	0.00032237	8.23e-07	3.2e-05	401	3	-1.3558	0.067409	0.38054	1	2507	1	-1.3558
SLC22A25	4	0.00032251	8.23e-07	3.2e-05	402	4	-0.57621	0.99968	1	1	17766	0	-0.57621
XIAP	4	0.00032339	8.23e-07	3.2e-05	403	4	-1.0769	0.99934	1	1	17714	0	-1.0769
HEXIM1	4	0.00032494	8.23e-07	3.2e-05	404	3	-0.90313	0.99794	1	1	17568	0	-0.90313
CIAO1	4	0.00033467	8.23e-07	3.2e-05	405	3	-1.0084	0.99856	1	1	17618	0	-1.0084	0.00033467
UBE2J2	4	0.00033717	8.23e-07	3.2e-05	406	4	-0.7992	0.99966	1	1	17765	0	-0.7992
SMC1A	4	0.00033856	8.23e-07	3.2e-05	407	2	-1.0929	0.32225	0.73743	1	6718	1	-1.0929	0.00033856
CHEK1	4	0.00033913	8.23e-07	3.2e-05	408	3	-1.2558	0.98663	0.99981	1	17060	0	-1.2558	0.00033913
FIS1	4	0.00034597	8.23e-07	3.2e-05	409	4	-0.64817	0.99965	1	1	17762	0	-0.64817
SLC7A5	4	0.00034881	8.23e-07	3.2e-05	410	3	-1.1027	0.96455	0.99828	1	16472	0	-1.1027
PSMD3	4	0.00035012	8.23e-07	3.2e-05	411	3	-1.0185	0.99627	0.99998	1	17459	0	-1.0185	0.00035012
WDR43	4	0.00035128	8.23e-07	3.2e-05	412	4	-1.1991	0.99885	1	1	17646	0	-1.1991	0.00035128
SNAPC4	4	0.00035504	8.23e-07	3.2e-05	413	3	-0.82137	0.90979	0.9917	1	15346	0	-0.82137	0.00035504
BRF1	4	0.00035537	8.23e-07	3.2e-05	414	3	-1.1127	0.99173	0.99988	1	17237	0	-1.1127
SLC22A10	3	0.00035768	2.74e-07	1.3e-05	415	3	-0.79752	0.99964	1	1	17760	0	-0.79752
CDCA5	4	0.00035787	8.23e-07	3.2e-05	416	4	-0.9481	0.99964	1	1	17759	0	-0.9481
CUL3	4	0.00036032	8.23e-07	3.2e-05	417	2	-1.01	0.96911	0.9989	1	16582	0	-1.01
INTS9	4	0.000362	8.23e-07	3.2e-05	418	3	-1.3419	0.75787	0.9535	1	12611	0	-1.3419	0.000362
RBM48	4	0.00036468	8.23e-07	3.2e-05	419	4	-0.62668	0.99964	1	1	17757	0	-0.62668
KLHL11	4	0.00036602	8.23e-07	3.2e-05	420	3	-0.78283	0.99714	0.99999	1	17508	0	-0.78283
CPSF3L	4	0.0003672	8.23e-07	3.2e-05	421	4	-0.92398	0.99935	1	1	17716	0	-0.92398
SRPR	4	0.00037212	8.23e-07	3.2e-05	422	3	-0.9373	0.99768	0.99999	1	17547	0	-0.9373
VPS52	4	0.00037387	8.23e-07	3.2e-05	423	4	-0.71741	0.99963	1	1	17756	0	-0.71741
NGDN	4	0.0003762	8.23e-07	3.2e-05	424	3	-1.0342	0.98735	0.99981	1	17084	0	-1.0342
TBCC	4	0.00038029	8.23e-07	3.2e-05	425	4	-0.62378	0.99962	1	1	17754	0	-0.62378
EXOSC5	4	0.00038067	8.23e-07	3.2e-05	426	4	-1.0041	0.99959	1	1	17747	0	-1.0041
GNL3	4	0.00038322	8.23e-07	3.2e-05	427	4	-0.77609	0.99962	1	1	17753	0	-0.77609	0.00038322
OTUB1	4	0.00038831	8.23e-07	3.2e-05	428	3	-0.96888	0.99338	0.99988	1	17305	0	-0.96888
DAD1	4	0.00039243	8.23e-07	3.2e-05	429	4	-1.0858	0.99961	1	1	17752	0	-1.0858	0.00039243
PSMC5	4	0.00040067	8.23e-07	3.2e-05	430	3	-1.3724	0.96191	0.99828	1	16409	0	-1.3724	0.00040067
NUP88	4	0.00040069	8.23e-07	3.2e-05	431	4	-0.87643	0.9996	1	1	17751	0	-0.87643	0.00040069
PSMC3IP	4	0.00040085	8.23e-07	3.2e-05	432	4	-0.62129	0.9996	1	1	17750	0	-0.62129
TUT1	4	0.00040502	8.23e-07	3.2e-05	433	4	-0.88065	0.99959	1	1	17749	0	-0.88065	0.00040502
POLD2	4	0.00040583	8.23e-07	3.2e-05	434	4	-0.97865	0.99959	1	1	17748	0	-0.97865
DDX46	4	0.00040586	8.23e-07	3.2e-05	435	3	-1.5193	0.98903	0.99984	1	17141	0	-1.5193
GRB2	4	0.00040604	8.23e-07	3.2e-05	436	3	-1.1355	0.94693	0.99673	1	16077	0	-1.1355
WDR75	4	0.00042098	8.23e-07	3.2e-05	437	3	-1.1741	0.30732	0.73743	1	6571	1	-1.1741	0.00042098
RUNX1	4	0.00042357	8.23e-07	3.2e-05	438	3	-1.1022	0.99791	1	1	17562	0	-1.1022
YARS	4	0.00043095	8.23e-07	3.2e-05	439	4	-0.75642	0.99957	1	1	17746	0	-0.75642	0.00043095
DNM2	4	0.00043247	8.23e-07	3.2e-05	440	2	-1.0577	0.60958	0.88382	1	10201	1	-1.0577	0.00043247
TXNL4A	4	0.00043251	8.23e-07	3.2e-05	441	3	-1.0275	0.94003	0.99591	1	15941	0	-1.0275	0.00043251
DDOST	4	0.00043401	8.23e-07	3.2e-05	442	3	-1.052	0.99192	0.99988	1	17243	0	-1.052	0.00043401
MEN1	4	0.00044082	8.23e-07	3.2e-05	443	3	-1.3263	0.94882	0.99742	1	16113	0	-1.3263
TRIM43	4	0.00044152	8.23e-07	3.2e-05	444	4	-1.1031	0.99956	1	1	17744	0	-1.1031
STRAP	4	0.00044515	8.23e-07	3.2e-05	445	4	-0.81909	0.99955	1	1	17743	0	-0.81909
MED17	4	0.00044653	1.37e-06	4.5e-05	446	4	-0.67582	0.99955	1	1	17742	0	-0.67582
RANBP2	4	0.00044671	1.37e-06	4.5e-05	447	4	-0.77538	0.99955	1	1	17741	0	-0.77538
CRNKL1	4	0.00045619	1.37e-06	4.5e-05	448	3	-1.0767	0.99761	0.99999	1	17541	0	-1.0767	0.00045619
CLTC	4	0.00045892	1.37e-06	4.5e-05	449	3	-0.92708	0.99812	1	1	17587	0	-0.92708	0.00045892
C11orf85	4	0.00046637	1.37e-06	4.5e-05	450	3	-0.82322	0.95868	0.99828	1	16324	0	-0.82322
SLC35B1	4	0.00046737	1.37e-06	4.5e-05	451	4	-0.83458	0.99953	1	1	17740	0	-0.83458	0.00046737
CCDC116	4	0.00046874	1.37e-06	4.5e-05	452	3	-1.0357	0.28702	0.72701	1	6362	1	-1.0357
PSMD11	4	0.00047231	1.37e-06	4.5e-05	453	3	-1.0721	0.99669	0.99998	1	17479	0	-1.0721	0.00047231
EXOSC3	4	0.00048151	1.37e-06	4.5e-05	454	4	-1.0597	0.99907	1	1	17680	0	-1.0597	0.00048151
NAA38	4	0.00048272	1.37e-06	4.5e-05	455	3	-1.2139	0.99579	0.99995	1	17430	0	-1.2139	0.00048272
POLR3A	4	0.00048368	1.37e-06	4.5e-05	456	4	-1.2497	0.99948	1	1	17735	0	-1.2497	0.00048368
MCM3AP	4	0.00048758	1.37e-06	4.5e-05	457	4	-1.0691	0.99896	1	1	17662	0	-1.0691	0.00048758
ZFX	4	0.00048967	1.37e-06	4.5e-05	458	4	-0.58013	0.99951	1	1	17739	0	-0.58013
RPL12	4	0.00049602	1.37e-06	4.5e-05	459	4	-0.80761	0.9995	1	1	17738	0	-0.80761	0.00049602
SEC16A	4	0.00049697	1.37e-06	4.5e-05	460	3	-1.0106	0.99851	1	1	17612	0	-1.0106
MED11	4	0.00049731	1.37e-06	4.5e-05	461	3	-1.3653	0.96757	0.99872	1	16535	0	-1.3653	0.00049731
WAPAL	4	0.0004978	1.37e-06	4.5e-05	462	3	-1.0819	0.99883	1	1	17643	0	-1.0819
ILF3	4	0.00050168	1.37e-06	4.5e-05	463	4	-0.97793	0.9995	1	1	17737	0	-0.97793	0.00050168
CDS2	4	0.00050192	1.37e-06	4.5e-05	464	3	-1.0549	0.99412	0.99988	1	17341	0	-1.0549
CDK7	4	0.00050777	1.37e-06	4.5e-05	465	4	-0.61871	0.99949	1	1	17736	0	-0.61871	0.00050777
DPAGT1	4	0.00051778	1.37e-06	4.5e-05	466	4	-0.7234	0.99948	1	1	17734	0	-0.7234	0.00051778
DBR1	4	0.00052656	1.37e-06	4.5e-05	467	4	-0.58639	0.99947	1	1	17732	0	-0.58639	0.00052656
BID	4	0.00052759	1.37e-06	4.5e-05	468	3	-0.88378	0.90923	0.9917	1	15332	0	-0.88378
RPL35	4	0.00053016	1.37e-06	4.5e-05	469	3	-0.73134	0.99468	0.99988	1	17372	0	-0.73134	0.00053016
CHAF1A	4	0.00053102	1.37e-06	4.5e-05	470	3	-1.0002	0.99433	0.99988	1	17355	0	-1.0002	0.00053102
BCL2L1	4	0.00054009	1.37e-06	4.5e-05	471	3	-1.0519	0.27097	0.71148	1	6220	1	-1.0519
COPB2	4	0.00054357	1.37e-06	4.5e-05	472	3	-1.1794	0.99042	0.99984	1	17189	0	-1.1794	0.00054357
GTF2E2	4	0.0005497	1.37e-06	4.5e-05	473	3	-1.018	0.99752	0.99999	1	17533	0	-1.018
GCLC	4	0.0005589	1.37e-06	4.5e-05	474	4	-0.93939	0.99944	1	1	17730	0	-0.93939
PSMA1	4	0.00055972	1.37e-06	4.5e-05	475	4	-1.1434	0.99944	1	1	17729	0	-1.1434	0.00055972
SKA2	4	0.00056209	1.37e-06	4.5e-05	476	3	-1.1098	0.9972	0.99999	1	17510	0	-1.1098
KIAA1524	4	0.00056219	1.37e-06	4.5e-05	477	4	-0.71052	0.99944	1	1	17728	0	-0.71052
RNF8	4	0.00056477	1.37e-06	4.5e-05	478	3	-1.0415	0.97235	0.99906	1	16668	0	-1.0415
UXT	4	0.00056498	1.37e-06	4.5e-05	479	3	-0.86306	0.99779	1	1	17554	0	-0.86306	0.00056498
COPS8	4	0.00056661	1.37e-06	4.5e-05	480	2	-0.61786	0.95274	0.99742	1	16185	0	-0.61786
CLTCL1	4	0.00057313	1.37e-06	4.5e-05	481	3	-1.113	0.89585	0.99	1	15098	0	-1.113
RPS11	4	0.00057635	1.37e-06	4.5e-05	482	4	-0.7803	0.99942	1	1	17726	0	-0.7803	0.00057635
FBXO5	4	0.00058147	1.37e-06	4.5e-05	483	3	-1.1063	0.96303	0.99828	1	16441	0	-1.1063
PRPF19	4	0.00058284	1.37e-06	4.5e-05	484	3	-1.083	0.97152	0.99906	1	16637	0	-1.083	0.00058284
NHP2L1	4	0.0005865	1.37e-06	4.5e-05	485	3	-0.9978	0.87021	0.98223	1	14639	0	-0.9978	0.0005865
LSM12	4	0.00059486	1.37e-06	4.5e-05	486	4	-0.60623	0.99941	1	1	17724	0	-0.60623	0.00059486
ZNF830	4	0.00059526	1.37e-06	4.5e-05	487	3	-1.0252	0.98662	0.99981	1	17058	0	-1.0252
GP1BB	4	0.00059665	1.37e-06	4.5e-05	488	3	-0.94204	0.99878	1	1	17637	0	-0.94204
TRAPPC8	4	0.00060797	1.37e-06	4.5e-05	489	2	-0.7798	0.067553	0.38687	1	2509	2	-0.7798
CMPK1	4	0.0006198	1.37e-06	4.5e-05	490	3	-1.0957	0.87585	0.98593	1	14736	0	-1.0957	0.0006198
CDK12	4	0.00062489	1.37e-06	4.5e-05	491	3	-1.0389	0.99853	1	1	17614	0	-1.0389
C22orf39	4	0.00062578	1.37e-06	4.5e-05	492	4	-0.6721	0.99937	1	1	17722	0	-0.6721
HIGD1B	4	0.00062825	1.37e-06	4.5e-05	493	4	-0.72283	0.99937	1	1	17721	0	-0.72283
VPS29	4	0.00063498	1.37e-06	4.5e-05	494	3	-0.9095	0.97834	0.99962	1	16816	0	-0.9095
GINS3	4	0.00064226	1.37e-06	4.5e-05	495	4	-0.58929	0.99936	1	1	17719	0	-0.58929	0.00064226
PSMA3	4	0.00064318	1.37e-06	4.5e-05	496	4	-1.0775	0.99936	1	1	17718	0	-1.0775	0.00064318
MCM6	4	0.00064729	1.37e-06	4.5e-05	497	4	-0.75922	0.99935	1	1	17717	0	-0.75922
ATP6V1D	4	0.0006512	1.37e-06	4.5e-05	498	4	-0.79948	0.99935	1	1	17715	0	-0.79948	0.0006512
SKIV2L2	4	0.00065425	1.37e-06	4.5e-05	499	2	-0.90638	0.57803	0.87864	1	9729	1	-0.90638
RPA1	4	0.00066583	1.37e-06	4.5e-05	500	4	-1.1215	0.99933	1	1	17712	0	-1.1215	0.00066583
EXOSC2	4	0.00067591	1.37e-06	4.5e-05	501	3	-1.1877	0.99663	0.99998	1	17476	0	-1.1877	0.00067591
GHDC	4	0.00067881	1.37e-06	4.5e-05	502	4	-0.66569	0.99932	1	1	17710	0	-0.66569
PGP	4	0.00068262	1.37e-06	4.5e-05	503	4	-0.73245	0.99932	1	1	17708	0	-0.73245
PAXIP1	4	0.0006901	1.37e-06	4.5e-05	504	3	-0.79367	0.68707	0.92247	1	11450	0	-0.79367
SAP18	4	0.00069269	1.37e-06	4.5e-05	505	4	-0.81055	0.99931	1	1	17707	0	-0.81055	0.00069269
SAP30BP	3	0.00069447	8.23e-07	3.2e-05	506	3	-0.94102	0.99931	1	1	17706	0	-0.94102
ALYREF	4	0.00069675	1.37e-06	4.5e-05	507	4	-0.93549	0.99901	1	1	17667	0	-0.93549
GLS2	4	0.00069829	1.37e-06	4.5e-05	508	3	-0.77815	0.988	0.99981	1	17103	0	-0.77815
LMO2	4	0.00069932	1.37e-06	4.5e-05	509	3	-1.0873	0.99714	0.99998	1	17507	0	-1.0873
AIFM1	4	0.00069971	1.37e-06	4.5e-05	510	4	-0.61713	0.9993	1	1	17705	0	-0.61713
LONP1	4	0.00070138	1.37e-06	4.5e-05	511	3	-0.94437	0.99489	0.9999	1	17385	0	-0.94437	0.00070138
CDK1	4	0.00070344	1.37e-06	4.5e-05	512	3	-1.168	0.86451	0.98223	1	14544	0	-1.168	0.00070344
DLST	4	0.0007041	1.37e-06	4.5e-05	513	4	-0.75131	0.9993	1	1	17704	0	-0.75131	0.0007041
RPL36	4	0.0007063	1.37e-06	4.5e-05	514	4	-0.83634	0.99929	1	1	17703	0	-0.83634	0.0007063
GNAZ	4	0.00070758	1.37e-06	4.5e-05	515	3	-0.98406	0.98729	0.99981	1	17081	0	-0.98406
UBXN4	4	0.00070802	1.37e-06	4.5e-05	516	4	-0.55105	0.99929	1	1	17702	0	-0.55105
BAG6	4	0.00070949	1.37e-06	4.5e-05	517	4	-0.74664	0.99929	1	1	17701	0	-0.74664
DNAJC9	4	0.00071853	1.37e-06	4.5e-05	518	4	-0.7835	0.9992	1	1	17693	0	-0.7835	0.00071853
ANAPC4	4	0.00071856	1.37e-06	4.5e-05	519	3	-1.4136	0.99871	1	1	17629	0	-1.4136	0.00071856
SET	4	0.00072085	1.37e-06	4.5e-05	520	4	-0.68305	0.99928	1	1	17700	0	-0.68305
RAD51D	4	0.00073064	1.37e-06	4.5e-05	521	3	-0.74588	0.87376	0.98477	1	14698	0	-0.74588	0.00073064
RPL38	4	0.00073085	1.37e-06	4.5e-05	522	4	-0.53838	0.99927	1	1	17699	0	-0.53838
MED25	4	0.00073387	1.37e-06	4.5e-05	523	4	-0.59073	0.99927	1	1	17698	0	-0.59073
SRSF10	4	0.00075041	1.92e-06	6e-05	524	3	-0.99171	0.34841	0.74783	1	6982	1	-0.99171
PPIL2	4	0.00075115	1.92e-06	6e-05	525	4	-0.61514	0.99925	1	1	17696	0	-0.61514	0.00075115
TAF1C	4	0.00075149	1.92e-06	6e-05	526	3	-0.84737	0.64581	0.8994	1	10781	0	-0.84737
YDJC	4	0.00075577	1.92e-06	6e-05	527	4	-0.67242	0.99924	1	1	17695	0	-0.67242
TCOF1	4	0.00075809	1.92e-06	6e-05	528	4	-0.56863	0.99924	1	1	17694	0	-0.56863
TUBGCP3	4	0.00075907	1.92e-06	6e-05	529	3	-1.0052	0.69027	0.92247	1	11499	0	-1.0052	0.00075907
NUP50	4	0.00076874	1.92e-06	6e-05	530	3	-1.2439	0.97475	0.9992	1	16734	0	-1.2439
MED18	4	0.00077053	1.92e-06	6e-05	531	3	-1.0196	0.84372	0.97771	1	14163	0	-1.0196	0.00077053
SNRPA1	4	0.00077822	1.92e-06	6e-05	532	4	-1.1698	0.99902	1	1	17670	0	-1.1698	0.00077822
CINP	4	0.00078012	1.92e-06	6e-05	533	2	-0.61344	0.44056	0.80018	1	7929	1	-0.61344	0.00078012
GK	4	0.00078155	1.92e-06	6e-05	534	3	-0.77229	0.98835	0.99984	1	17116	0	-0.77229
HBS1L	4	0.00078598	1.92e-06	6e-05	535	3	-0.82062	0.73158	0.94761	1	12180	0	-0.82062
PLK4	4	0.00079044	1.92e-06	6e-05	536	3	-1.0964	0.99792	1	1	17566	0	-1.0964
TPX2	4	0.00079603	1.92e-06	6e-05	537	3	-1.0637	0.98454	0.99975	1	16995	0	-1.0637	0.00079603
MORF4L1	4	0.00080164	1.92e-06	6e-05	538	3	-0.78413	0.99654	0.99998	1	17471	0	-0.78413
SNRNP27	4	0.00081011	1.92e-06	6e-05	539	3	-1.2698	0.9985	1	1	17611	0	-1.2698	0.00081011
EIF2B2	4	0.00082252	1.92e-06	6e-05	540	4	-1.0957	0.99918	1	1	17692	0	-1.0957
KPNA2	4	0.00082254	1.92e-06	6e-05	541	2	-0.74322	0.98709	0.99981	1	17074	0	-0.74322
DARS	4	0.00082551	1.92e-06	6e-05	542	3	-0.88636	0.99528	0.99995	1	17404	0	-0.88636
SCGB1A1	4	0.00082608	1.92e-06	6e-05	543	3	-0.69148	0.97617	0.99933	1	16772	0	-0.69148
TAF6L	4	0.00082857	1.92e-06	6e-05	544	4	-0.56118	0.99917	1	1	17691	0	-0.56118
CHAF1B	4	0.00083577	1.92e-06	6e-05	545	4	-0.7635	0.99916	1	1	17690	0	-0.7635	0.00083577
ANAPC15	4	0.00084417	1.92e-06	6e-05	546	3	-0.96587	0.95259	0.99742	1	16179	0	-0.96587
SPDL1	4	0.00085864	1.92e-06	6e-05	547	3	-1.0177	0.3709	0.74783	1	7196	1	-1.0177
SERPIND1	4	0.000861	1.92e-06	6e-05	548	3	-1.0217	0.72256	0.94447	1	12037	0	-1.0217
NIPBL	4	0.00086133	1.92e-06	6e-05	549	4	-0.95621	0.99914	1	1	17689	0	-0.95621
RUVBL2	4	0.00086788	1.92e-06	6e-05	550	4	-1.1164	0.99913	1	1	17688	0	-1.1164	0.00086788
BANP	4	0.00087045	1.92e-06	6e-05	551	4	-0.55011	0.99913	1	1	17686	0	-0.55011
GNB1L	3	0.00087561	8.23e-07	3.2e-05	552	2	-1.3946	0.97941	0.99885	1	16843	0	-1.3946
CDYL	4	0.00087583	1.92e-06	6e-05	553	3	-0.87181	0.80863	0.96838	1	13532	0	-0.87181
LRIF1	4	0.0008866	1.92e-06	6e-05	554	4	-0.53913	0.99911	1	1	17685	0	-0.53913
CDC40	4	0.00088661	1.92e-06	6e-05	555	3	-0.9045	0.98274	0.99969	1	16935	0	-0.9045
ATP2A2	4	0.00089022	1.92e-06	6e-05	556	3	-0.94025	0.99599	0.99997	1	17441	0	-0.94025	0.00089022
RBBP4	4	0.00089142	1.92e-06	6e-05	557	3	-0.95912	0.86728	0.98223	1	14593	0	-0.95912
WNK1	4	0.00089798	1.92e-06	6e-05	558	4	-0.67598	0.9991	1	1	17684	0	-0.67598
CEBPZ	4	0.00091065	1.92e-06	6e-05	559	4	-0.77986	0.99909	1	1	17683	0	-0.77986	0.00091065
NSRP1	4	0.00091867	2.47e-06	7.3e-05	560	4	-0.54097	0.99908	1	1	17682	0	-0.54097
CTNNBL1	4	0.00091926	2.47e-06	7.3e-05	561	4	-0.58755	0.99908	1	1	17681	0	-0.58755
NUS1	4	0.00093059	2.47e-06	7.3e-05	562	3	-1.1478	0.97026	0.9989	1	16611	0	-1.1478	0.00093059
NCAPD2	4	0.00093397	2.47e-06	7.3e-05	563	4	-0.84052	0.99907	1	1	17679	0	-0.84052
UBA1	4	0.00093759	2.47e-06	7.3e-05	564	3	-1.3155	0.73087	0.94761	1	12172	0	-1.3155	0.00093759
EFNA4	4	0.0009379	2.47e-06	7.3e-05	565	4	-0.61525	0.99906	1	1	17678	0	-0.61525
SSBP2	4	0.00094306	2.47e-06	7.3e-05	566	4	-0.50267	0.99906	1	1	17677	0	-0.50267
ROMO1	4	0.00094369	2.47e-06	7.3e-05	567	3	-0.74713	0.9488	0.99742	1	16112	0	-0.74713	0.00094369
HS6ST1	4	0.00094397	2.47e-06	7.3e-05	568	4	-0.92717	0.99906	1	1	17676	0	-0.92717
ACTB	3	0.00094624	8.23e-07	3.2e-05	569	3	-1.0279	0.99905	1	1	17675	0	-1.0279	0.00094624
EFTUD2	4	0.00094803	2.47e-06	7.3e-05	570	3	-1.0948	0.98821	0.99981	1	17110	0	-1.0948	0.00094803
HNRNPL	4	0.00095122	2.47e-06	7.3e-05	571	3	-0.881	0.14457	0.58451	1	4160	1	-0.881	0.00095122
CDC26	4	0.00095374	2.47e-06	7.3e-05	572	3	-1.0974	0.99371	0.99988	1	17322	0	-1.0974
PSMA2	4	0.00096064	2.47e-06	7.3e-05	573	2	-1.0939	0.87037	0.98223	1	14641	0	-1.0939	0.00096064
YTHDF2	4	0.00096421	2.47e-06	7.3e-05	574	4	-0.57587	0.99904	1	1	17672	0	-0.57587
TEKT4	4	0.00097508	2.47e-06	7.3e-05	575	4	-0.74041	0.99902	1	1	17671	0	-0.74041
YTHDC1	4	0.00097727	2.47e-06	7.3e-05	576	3	-1.0002	0.98751	0.99981	1	17090	0	-1.0002
ANO1	4	0.00097855	2.47e-06	7.3e-05	577	3	-0.7472	0.87592	0.98593	1	14739	0	-0.7472
RPS23	4	0.00098047	2.47e-06	7.3e-05	578	3	-1.0191	0.89381	0.99	1	15063	0	-1.0191	0.00098047
HAUS4	4	0.00098792	2.47e-06	7.3e-05	579	4	-0.97434	0.99901	1	1	17669	0	-0.97434
USP5	4	0.00099038	2.47e-06	7.3e-05	580	3	-0.71095	0.97667	0.99945	1	16779	0	-0.71095	0.00099038
EIF3F	4	0.00099329	2.47e-06	7.3e-05	581	4	-0.51741	0.99901	1	1	17668	0	-0.51741
PLRG1	4	0.00099466	2.47e-06	7.3e-05	582	2	-0.82725	0.89224	0.99	1	15033	0	-0.82725	0.00099466
MAU2	4	0.00099532	2.47e-06	7.3e-05	583	3	-1.107	0.75726	0.9535	1	12601	0	-1.107
ADAM11	4	0.0009955	2.47e-06	7.3e-05	584	4	-0.59981	0.999	1	1	17666	0	-0.59981
ATP6AP2	4	0.00099791	2.47e-06	7.3e-05	585	3	-0.84753	0.77041	0.95625	1	12830	0	-0.84753
NUDT4	4	0.0010006	2.47e-06	7.3e-05	586	4	-0.68946	0.999	1	1	17665	0	-0.68946	0.0010006
IPO9	4	0.0010038	2.47e-06	7.3e-05	587	3	-0.70259	0.29244	0.72701	1	6424	1	-0.70259
COPS3	4	0.0010057	2.47e-06	7.3e-05	588	4	-0.81289	0.99899	1	1	17664	0	-0.81289	0.0010057
CECR5	4	0.0010077	2.47e-06	7.3e-05	589	3	-0.77462	0.74795	0.9535	1	12441	0	-0.77462
YPEL4	4	0.0010169	3.56e-06	0.000102	590	3	-0.81404	0.54196	0.863	1	9203	1	-0.81404
NUP93	4	0.0010188	3.56e-06	0.000102	591	3	-0.9754	0.99798	1	1	17572	0	-0.9754	0.0010188
ZZZ3	4	0.0010237	3.56e-06	0.000102	592	4	-0.582	0.99898	1	1	17663	0	-0.582
NCBP1	4	0.0010281	3.56e-06	0.000102	593	4	-0.72773	0.99887	1	1	17649	0	-0.72773	0.0010281
LZTR1	4	0.0010293	3.56e-06	0.000102	594	2	-0.90146	0.81347	0.97049	1	13606	0	-0.90146
C5orf60	4	0.0010327	3.56e-06	0.000102	595	3	-0.8004	0.99877	1	1	17635	0	-0.8004
REV3L	4	0.0010501	3.56e-06	0.000102	596	4	-0.57914	0.99895	1	1	17661	0	-0.57914
MAP2K1	4	0.0010541	3.56e-06	0.000102	597	4	-0.47179	0.99895	1	1	17660	0	-0.47179
SUDS3	4	0.0010541	3.56e-06	0.000102	598	3	-1.0454	0.79597	0.96388	1	13318	0	-1.0454
TAF1D	4	0.0010574	3.56e-06	0.000102	599	4	-0.43207	0.99894	1	1	17659	0	-0.43207
HMGCR	4	0.001061	3.56e-06	0.000102	600	4	-1.1182	0.99894	1	1	17658	0	-1.1182
IER3IP1	4	0.0010707	3.56e-06	0.000102	601	4	-0.92354	0.99893	1	1	17657	0	-0.92354
KPNA4	4	0.0010711	3.56e-06	0.000102	602	3	-0.83541	0.94828	0.99742	1	16104	0	-0.83541
PDCD11	4	0.0010756	3.56e-06	0.000102	603	3	-0.87359	0.96027	0.99828	1	16370	0	-0.87359
PIGS	4	0.0010808	3.56e-06	0.000102	604	4	-0.62645	0.99892	1	1	17655	0	-0.62645
CDK9	4	0.0010912	3.56e-06	0.000102	605	3	-0.91822	0.92436	0.99431	1	15622	0	-0.91822	0.0010912
RPA2	4	0.0010935	3.56e-06	0.000102	606	3	-0.85846	0.96655	0.99828	1	16514	0	-0.85846	0.0010935
TRAIP	4	0.0011124	4.11e-06	0.000115	607	4	-0.80681	0.99889	1	1	17653	0	-0.80681
KCMF1	4	0.0011159	4.11e-06	0.000115	608	4	-0.43161	0.99888	1	1	17652	0	-0.43161
COL1A1	4	0.0011197	4.11e-06	0.000115	609	4	-0.52548	0.99888	1	1	17651	0	-0.52548
CCNA2	4	0.0011206	4.11e-06	0.000115	610	4	-0.97268	0.99886	1	1	17648	0	-0.97268	0.0011206
CRLS1	4	0.0011207	4.11e-06	0.000115	611	4	-0.95374	0.99888	1	1	17650	0	-0.95374
ATP6V1A	3	0.0011225	1.92e-06	6e-05	612	2	-0.71612	0.95952	0.99827	1	16351	0	-0.71612	0.0011225
FCGR1A	4	0.0011328	4.11e-06	0.000115	613	3	-0.83001	0.99845	1	1	17606	0	-0.83001
EIF2S3	4	0.0011469	4.11e-06	0.000115	614	3	-1.1592	0.99174	0.99988	1	17238	0	-1.1592	0.0011469
SNRPD3	4	0.001148	4.11e-06	0.000115	615	2	-0.83483	0.48846	0.84735	1	8507	1	-0.83483	0.001148
SLC16A1	4	0.001149	4.11e-06	0.000115	616	4	-0.79825	0.99885	1	1	17647	0	-0.79825
PSMD6	4	0.0011526	4.11e-06	0.000115	617	2	-0.78617	0.094403	0.48446	1	3096	1	-0.78617
MZT2B	4	0.0011569	4.11e-06	0.000115	618	3	-0.92051	0.99601	0.99997	1	17445	0	-0.92051
SF1	4	0.0011576	4.11e-06	0.000115	619	3	-1.047	0.99872	1	1	17630	0	-1.047	0.0011576
RFC2	4	0.0011781	4.11e-06	0.000115	620	3	-0.73473	0.74526	0.94761	1	12399	0	-0.73473	0.0011781
DDX23	4	0.0011851	4.11e-06	0.000115	621	3	-0.98565	0.99823	1	1	17592	0	-0.98565
DDX6	4	0.0011865	4.11e-06	0.000115	622	3	-0.96852	0.91912	0.99374	1	15523	0	-0.96852
WDR25	4	0.0011975	5.76e-06	0.000138	623	3	-0.76693	0.98908	0.99984	1	17143	0	-0.76693	0.0011975
EIF1AX	4	0.0012063	5.76e-06	0.000138	624	3	-1.1547	0.83578	0.9742	1	13993	0	-1.1547
CENPN	4	0.0012151	5.76e-06	0.000138	625	3	-0.86486	0.99663	0.99998	1	17475	0	-0.86486
ANO5	4	0.0012181	5.76e-06	0.000138	626	2	-0.14676	0.48214	0.84216	1	8422	1	-0.14676
PDRG1	4	0.001221	5.76e-06	0.000138	627	3	-0.95752	0.61425	0.88907	1	10254	1	-0.95752
MED26	4	0.0012247	5.76e-06	0.000138	628	3	-0.73936	0.99383	0.99988	1	17326	0	-0.73936
COG2	4	0.0012404	5.76e-06	0.000138	629	3	-0.86527	0.98473	0.99975	1	17004	0	-0.86527
SKP1	3	0.0012481	2.47e-06	7.3e-05	630	3	-1.1463	0.99875	1	1	17633	0	-1.1463	0.0012481
NUP205	4	0.0012615	5.76e-06	0.000138	631	3	-1.0959	0.79104	0.96388	1	13224	0	-1.0959
FANCM	4	0.0012653	5.76e-06	0.000138	632	3	-0.92463	0.50803	0.863	1	8742	1	-0.92463
PSMD7	4	0.0012661	5.76e-06	0.000138	633	3	-0.83807	0.96815	0.9989	1	16559	0	-0.83807
BPTF	4	0.0012691	5.76e-06	0.000138	634	3	-0.69832	0.89121	0.99	1	15012	0	-0.69832
PHF5A	3	0.0012902	2.47e-06	7.3e-05	635	2	-1.382	0.86404	0.98246	1	14534	0	-1.382	0.0012902
SAE1	4	0.001292	5.76e-06	0.000138	636	3	-0.89993	0.99794	1	1	17569	0	-0.89993	0.001292
PRPF39	4	0.0012936	5.76e-06	0.000138	637	3	-0.94915	0.94345	0.99673	1	16007	0	-0.94915
EEFSEC	4	0.0012975	5.76e-06	0.000138	638	3	-1.1206	0.74197	0.94761	1	12340	0	-1.1206
PCID2	4	0.0013223	5.76e-06	0.000138	639	3	-0.58166	0.03603	0.33021	1	1799	1	-0.58166	0.0013223
EFTUD1	4	0.0013514	5.76e-06	0.000138	640	3	-0.80096	0.91946	0.99374	1	15533	0	-0.80096
NUP214	4	0.0013617	5.76e-06	0.000138	641	3	-0.88737	0.29679	0.73743	1	6467	1	-0.88737	0.0013617
SSRP1	4	0.0013618	5.76e-06	0.000138	642	3	-1.2102	0.11143	0.5313	1	3470	1	-1.2102
SPC24	3	0.0013657	8.5e-06	0.000186	643	2	-1.2914	0.096648	0.43826	1	3148	1	-1.2914	0.0013657
DNAJA1	4	0.0013665	5.76e-06	0.000138	644	3	-1.1407	0.99561	0.99995	1	17419	0	-1.1407
CUL1	4	0.0013668	5.76e-06	0.000138	645	3	-1.0045	0.98515	0.99975	1	17013	0	-1.0045
SLMO2	4	0.0013689	5.76e-06	0.000138	646	3	-0.76295	0.65281	0.90436	1	10897	0	-0.76295	0.0013689
NOP16	4	0.0013737	5.76e-06	0.000138	647	3	-0.84995	0.98516	0.99975	1	17015	0	-0.84995	0.0013737
ACACA	4	0.0013946	5.76e-06	0.000138	648	3	-0.69837	0.9947	0.99988	1	17373	0	-0.69837
KRT26	4	0.001397	5.76e-06	0.000138	649	3	-0.7409	0.99765	0.99999	1	17544	0	-0.7409
GTF3C4	4	0.0014125	5.76e-06	0.000138	650	3	-0.38478	0.96684	0.99851	1	16520	0	-0.38478
HIC2	4	0.0014157	5.76e-06	0.000138	651	3	-1.1686	0.60366	0.88382	1	10113	1	-1.1686
SLAMF6	4	0.0014215	5.76e-06	0.000138	652	3	-0.76074	0.98794	0.99981	1	17102	0	-0.76074
RPAP2	4	0.0014338	5.76e-06	0.000138	653	3	-0.75094	0.99778	1	1	17553	0	-0.75094
TAF7	4	0.0014362	5.76e-06	0.000138	654	3	-0.93478	0.30856	0.73743	1	6585	1	-0.93478
NCBP2	4	0.00144	5.76e-06	0.000138	655	2	-0.5866	0.93845	0.99591	1	15909	0	-0.5866	0.00144
PFN1	4	0.0014533	5.76e-06	0.000138	656	2	-0.93918	0.996	0.99997	1	17443	0	-0.93918	0.0014533
FAM215A	3	0.0014589	8.5e-06	0.000186	657	3	-0.77274	0.99854	0.99999	1	17617	0	-0.77274
TRAPPC1	4	0.0014628	5.76e-06	0.000138	658	3	-1.1079	0.9839	0.99969	1	16966	0	-1.1079	0.0014628
MRP63	4	0.0014737	5.76e-06	0.000138	659	3	-0.8822	0.88598	0.98906	1	14933	0	-0.8822	0.0014737
RPL8	4	0.0014821	5.76e-06	0.000138	660	3	-1.0439	0.99675	0.99998	1	17482	0	-1.0439	0.0014821
CENPH	4	0.0014829	5.76e-06	0.000138	661	3	-0.87498	0.96727	0.99851	1	16530	0	-0.87498
RPS5	4	0.0014922	5.76e-06	0.000138	662	3	-0.74792	0.99756	0.99999	1	17535	0	-0.74792	0.0014922
VARS	4	0.0015032	5.76e-06	0.000138	663	3	-1.0013	0.99757	0.99999	1	17537	0	-1.0013	0.0015032
COASY	4	0.0015297	5.76e-06	0.000138	664	3	-0.85234	0.99147	0.99988	1	17229	0	-0.85234
KIN	4	0.0015528	5.76e-06	0.000138	665	2	-0.50713	0.68963	0.92247	1	11490	0	-0.50713
RPA3	4	0.0015611	5.76e-06	0.000138	666	3	-0.935	0.90601	0.9917	1	15280	0	-0.935
NDC80	4	0.001573	5.76e-06	0.000138	667	3	-0.91493	0.8605	0.98085	1	14473	0	-0.91493	0.001573
TUBGCP5	4	0.0016021	5.76e-06	0.000138	668	3	-0.60881	0.96647	0.99828	1	16512	0	-0.60881
VDAC1	4	0.0016127	5.76e-06	0.000138	669	3	-0.74167	0.93375	0.99544	1	15819	0	-0.74167
MAX	4	0.0016136	5.76e-06	0.000138	670	3	-0.82713	0.99388	0.99988	1	17332	0	-0.82713
PPP2R1A	4	0.0016163	5.76e-06	0.000138	671	3	-0.89026	0.99437	0.99988	1	17357	0	-0.89026
NCAPH	4	0.0016341	5.76e-06	0.000138	672	3	-0.76046	0.99864	1	1	17622	0	-0.76046
RANBP1	4	0.0016548	5.76e-06	0.000138	673	3	-0.89593	0.98121	0.99962	1	16901	0	-0.89593
RFC4	4	0.0016616	5.76e-06	0.000138	674	2	-0.8464	0.9579	0.99828	1	16301	0	-0.8464	0.0016616
GTF2F2	3	0.0016729	9.05e-06	0.000197	675	2	-0.87379	0.49049	0.80058	1	8531	1	-0.87379
ETV4	4	0.001694	5.76e-06	0.000138	676	3	-0.8423	0.97832	0.99962	1	16815	0	-0.8423
WDHD1	4	0.0017023	5.76e-06	0.000138	677	3	-0.86446	0.99795	1	1	17570	0	-0.86446
HTR3A	4	0.0017078	5.76e-06	0.000138	678	3	-0.75018	0.99832	1	1	17601	0	-0.75018
ST13	2	0.0017192	2.74e-07	1.3e-05	679	2	-0.622	0.99828	1	1	17595	0	-0.622
SMARCE1	4	0.0017403	5.76e-06	0.000138	680	3	-0.81685	0.9291	0.99544	1	15725	0	-0.81685
AMBRA1	4	0.0017422	5.76e-06	0.000138	681	3	-0.79472	0.84332	0.97771	1	14156	0	-0.79472
CCDC174	4	0.0017509	5.76e-06	0.000138	682	2	-0.73127	0.78163	0.95889	1	13042	0	-0.73127
LSM6	3	0.0017561	9.05e-06	0.000197	683	3	-0.80858	0.99824	0.99999	1	17593	0	-0.80858
MCM2	4	0.0017594	5.76e-06	0.000138	684	2	-1.0268	0.78482	0.96147	1	13099	0	-1.0268
EIF2B1	4	0.0017657	5.76e-06	0.000138	685	3	-0.93502	0.824	0.97235	1	13789	0	-0.93502	0.0017657
SRSF1	4	0.001768	5.76e-06	0.000138	686	3	-1.2203	0.85864	0.98085	1	14442	0	-1.2203	0.001768
MED16	4	0.001778	5.76e-06	0.000138	687	3	-0.85162	0.64378	0.89429	1	10743	0	-0.85162
YPEL1	4	0.0017908	5.76e-06	0.000138	688	3	-0.86577	0.99817	1	1	17590	0	-0.86577
AQR	4	0.0017932	5.76e-06	0.000138	689	3	-1.0906	0.78127	0.95625	1	13035	0	-1.0906	0.0017932
MASTL	4	0.0018018	5.76e-06	0.000138	690	3	-0.70325	0.94775	0.99742	1	16095	0	-0.70325	0.0018018
DRGX	4	0.0018085	5.76e-06	0.000138	691	3	-0.71182	0.7076	0.93782	1	11791	0	-0.71182
CHMP5	4	0.0018296	5.76e-06	0.000138	692	3	-0.8031	0.91525	0.99242	1	15448	0	-0.8031
ACTL6A	3	0.0018331	1.95e-05	0.000394	693	3	-1.3076	0.99817	0.99998	1	17589	0	-1.3076	0.0018331
NUMA1	4	0.0018484	5.76e-06	0.000138	694	2	-0.60789	0.79833	0.96388	1	13366	0	-0.60789
MED1	4	0.0018568	5.76e-06	0.000138	695	3	-0.6605	0.9948	0.9999	1	17382	0	-0.6605
RPLP1	2	0.0018602	2.74e-07	1.3e-05	696	2	-0.94084	0.99814	1	1	17588	0	-0.94084	0.0018602
AP2M1	4	0.0018872	5.76e-06	0.000138	697	3	-0.95209	0.99784	1	1	17558	0	-0.95209
SRBD1	4	0.0018922	5.76e-06	0.000138	698	3	-0.99107	0.52013	0.863	1	8903	1	-0.99107	0.0018922
ANAPC5	4	0.0019099	5.76e-06	0.000138	699	3	-0.9668	0.99516	0.99993	1	17400	0	-0.9668	0.0019099
UBE2M	4	0.0019306	5.76e-06	0.000138	700	2	-0.97343	0.97939	0.99962	1	16842	0	-0.97343	0.0019306
NPAT	4	0.0019671	5.76e-06	0.000138	701	3	-0.83473	0.98711	0.99981	1	17076	0	-0.83473
ZNF280B	4	0.0019731	5.76e-06	0.000138	702	3	-0.55738	0.93757	0.99591	1	15886	0	-0.55738
RPS18	2	0.0019891	2.74e-07	1.3e-05	703	2	-1.0191	0.99801	1	1	17577	0	-1.0191	0.0019891
MED6	4	0.0019934	5.76e-06	0.000138	704	3	-0.97437	0.9986	1	1	17620	0	-0.97437
SMG6	4	0.0020025	5.76e-06	0.000138	705	3	-0.9822	0.99872	1	1	17632	0	-0.9822
TARS2	4	0.0020115	5.76e-06	0.000138	706	2	-0.86557	0.97136	0.99906	1	16635	0	-0.86557
TPI1	4	0.0020325	5.76e-06	0.000138	707	3	-0.94336	0.69651	0.92247	1	11613	0	-0.94336
COG8	4	0.0020408	5.76e-06	0.000138	708	3	-0.71423	0.98269	0.99969	1	16934	0	-0.71423
GPI	4	0.0020554	5.76e-06	0.000138	709	3	-0.90723	0.99474	0.99988	1	17377	0	-0.90723
RPLP0	4	0.0020794	5.76e-06	0.000138	710	3	-1.0593	0.9073	0.9917	1	15308	0	-1.0593	0.0020794
BICD1	4	0.0020815	5.76e-06	0.000138	711	3	-0.64495	0.61555	0.88907	1	10275	1	-0.64495
CACTIN	4	0.0021111	5.76e-06	0.000138	712	3	-1.0181	0.90905	0.9917	1	15328	0	-1.0181
PSMB3	4	0.0021344	5.76e-06	0.000138	713	3	-1.1302	0.87492	0.98593	1	14723	0	-1.1302	0.0021344
NODAL	4	0.0021345	5.76e-06	0.000138	714	3	-0.56922	0.92095	0.99374	1	15569	0	-0.56922
SURF4	4	0.0021366	5.76e-06	0.000138	715	3	-0.61437	0.91616	0.99309	1	15471	0	-0.61437
SBNO1	4	0.0021387	5.76e-06	0.000138	716	3	-0.85203	0.92617	0.99544	1	15663	0	-0.85203	0.0021387
UFD1L	4	0.0021591	5.76e-06	0.000138	717	3	-0.90825	0.34833	0.74783	1	6981	1	-0.90825
RPS9	4	0.0021623	5.76e-06	0.000138	718	3	-0.78117	0.98618	0.99981	1	17049	0	-0.78117
ATP6V1G1	4	0.0021735	5.76e-06	0.000138	719	2	-0.515	0.88553	0.98906	1	14922	0	-0.515
EFR3A	4	0.0021742	5.76e-06	0.000138	720	3	-0.74619	0.99593	0.99997	1	17437	0	-0.74619
MTA2	4	0.0021782	5.76e-06	0.000138	721	3	-0.74019	0.93572	0.99544	1	15863	0	-0.74019
CDK11A	4	0.0022161	5.76e-06	0.000138	722	2	-0.69964	0.83516	0.9742	1	13984	0	-0.69964
EIF2B3	4	0.002221	5.76e-06	0.000138	723	3	-0.70036	0.10188	0.50035	1	3250	1	-0.70036	0.002221
FEN1	4	0.0022485	5.76e-06	0.000138	724	3	-0.77246	0.86877	0.98223	1	14617	0	-0.77246
POLQ	4	0.0022584	5.76e-06	0.000138	725	3	-0.70002	0.99477	0.99988	1	17380	0	-0.70002
PRAME	4	0.0022628	5.76e-06	0.000138	726	3	-0.78197	0.99618	0.99998	1	17456	0	-0.78197
SPCS3	4	0.0022863	5.76e-06	0.000138	727	3	-0.87684	0.89753	0.9917	1	15133	0	-0.87684
RPS15A	2	0.0022948	2.74e-07	1.3e-05	728	2	-1.089	0.99771	1	1	17548	0	-1.089	0.0022948
SAP130	4	0.0022963	5.76e-06	0.000138	729	3	-0.81426	0.6881	0.92247	1	11465	0	-0.81426
DCTN2	4	0.0022996	5.76e-06	0.000138	730	3	-0.65521	0.99318	0.99988	1	17296	0	-0.65521
MPP3	4	0.0023097	5.76e-06	0.000138	731	3	-0.61862	0.99745	0.99999	1	17524	0	-0.61862
GTF2A2	4	0.0023255	5.76e-06	0.000138	732	3	-0.79579	0.99796	1	1	17571	0	-0.79579
RPL18A	3	0.002334	1.95e-05	0.000394	733	2	-1.2728	0.99283	0.99989	1	17271	0	-1.2728	0.002334
LSM5	3	0.0023366	1.95e-05	0.000394	734	3	-1.098	0.99766	0.99998	1	17545	0	-1.098
XPO1	3	0.0023665	1.95e-05	0.000394	735	3	-1.3735	0.99385	0.99989	1	17328	0	-1.3735	0.0023665
ZNF207	4	0.0024008	5.76e-06	0.000138	736	3	-0.85975	0.74299	0.94761	1	12356	0	-0.85975
SFTA2	4	0.0024031	5.76e-06	0.000138	737	3	-0.68775	0.9187	0.99374	1	15516	0	-0.68775
NSUN5	4	0.0024138	5.76e-06	0.000138	738	2	-0.80549	0.86242	0.98223	1	14504	0	-0.80549
PRELID1	4	0.0024171	6.31e-06	0.000138	739	2	-0.52642	0.85933	0.98085	1	14454	0	-0.52642	0.0024171
SUPV3L1	4	0.0024565	6.31e-06	0.000138	740	3	-0.82424	0.9872	0.99981	1	17078	0	-0.82424	0.0024565
HARS	4	0.0024623	6.31e-06	0.000138	741	3	-0.8189	0.86432	0.98223	1	14538	0	-0.8189	0.0024623
CCT4	4	0.0024804	6.31e-06	0.000138	742	2	-0.64161	0.71362	0.94125	1	11888	0	-0.64161	0.0024804
MAD2L2	4	0.0024894	6.31e-06	0.000138	743	3	-0.87227	0.98472	0.99975	1	17003	0	-0.87227
USP18	4	0.0025106	6.31e-06	0.000138	744	3	-0.73511	0.99565	0.99995	1	17421	0	-0.73511
TSR1	4	0.0025142	6.31e-06	0.000138	745	3	-0.67639	0.93633	0.99544	1	15867	0	-0.67639	0.0025142
PELO	4	0.0025615	6.31e-06	0.000138	746	3	-0.94757	0.97086	0.99906	1	16623	0	-0.94757
NFS1	4	0.0025751	6.31e-06	0.000138	747	3	-0.71251	0.99109	0.99984	1	17218	0	-0.71251
COPS4	4	0.0025813	6.31e-06	0.000138	748	3	-0.88518	0.99879	1	1	17639	0	-0.88518
RAE1	4	0.0025837	6.31e-06	0.000138	749	3	-0.61683	0.50995	0.863	1	8765	1	-0.61683	0.0025837
NUFIP2	4	0.0026201	6.31e-06	0.000138	750	3	-0.73221	0.6885	0.92247	1	11474	0	-0.73221
NFYB	4	0.0026421	6.31e-06	0.000138	751	3	-0.8085	0.9415	0.99634	1	15968	0	-0.8085
RCC1	4	0.0026593	6.31e-06	0.000138	752	3	-0.56752	0.9793	0.99962	1	16836	0	-0.56752	0.0026593
RALGPS2	3	0.0026609	1.95e-05	0.000394	753	3	-0.64303	0.99734	0.99998	1	17520	0	-0.64303
WNT9B	4	0.0026692	6.31e-06	0.000138	754	3	-0.65416	0.99187	0.99988	1	17242	0	-0.65416
ECD	4	0.0026816	6.31e-06	0.000138	755	3	-0.89554	0.99293	0.99988	1	17281	0	-0.89554	0.0026816
INHBC	4	0.002684	6.31e-06	0.000138	756	3	-0.56099	0.90843	0.9917	1	15319	0	-0.56099
VPS37A	4	0.0026989	6.31e-06	0.000138	757	3	-0.66963	0.99343	0.99988	1	17307	0	-0.66963
LARS	4	0.0027289	6.31e-06	0.000138	758	3	-0.59561	0.99655	0.99998	1	17472	0	-0.59561	0.0027289
DCTN5	4	0.0027309	6.31e-06	0.000138	759	3	-1.07	0.96046	0.99828	1	16374	0	-1.07	0.0027309
RACGAP1	4	0.0027415	6.31e-06	0.000138	760	2	-0.74066	0.96667	0.99828	1	16518	0	-0.74066	0.0027415
DDHD2	4	0.0027427	6.31e-06	0.000138	761	3	-0.89587	0.98603	0.99981	1	17045	0	-0.89587
TRNAU1AP	4	0.0027477	6.31e-06	0.000138	762	3	-0.84167	0.4656	0.83169	1	8233	1	-0.84167	0.0027477
SETDB1	4	0.0027515	6.31e-06	0.000138	763	3	-0.67888	0.99552	0.99995	1	17415	0	-0.67888
HCFC1	4	0.0027603	6.31e-06	0.000138	764	3	-0.66446	0.99561	0.99995	1	17420	0	-0.66446	0.0027603
ATP5H	4	0.0027838	6.31e-06	0.000138	765	2	-0.8959	0.65617	0.90436	1	10946	0	-0.8959
SNAP29	4	0.0027856	6.31e-06	0.000138	766	3	-0.80799	0.9729	0.99906	1	16693	0	-0.80799
TICRR	4	0.0027971	6.31e-06	0.000138	767	3	-0.98727	0.9975	0.99999	1	17529	0	-0.98727	0.0027971
FIP1L1	4	0.002798	6.31e-06	0.000138	768	2	-0.64166	0.034655	0.33021	1	1751	1	-0.64166
RPL13A	2	0.0028019	2.74e-07	1.3e-05	769	2	-1.2941	0.9972	1	1	17509	0	-1.2941
RHOQ	4	0.0028316	6.31e-06	0.000138	770	3	-0.67803	0.9144	0.99242	1	15435	0	-0.67803
LEPREL4	4	0.0028444	6.31e-06	0.000138	771	3	-0.75351	0.86008	0.98085	1	14468	0	-0.75351
PHB	4	0.0028534	6.31e-06	0.000138	772	3	-0.53598	0.99707	0.99998	1	17502	0	-0.53598	0.0028534
ETF1	4	0.0028624	6.31e-06	0.000138	773	2	-0.87554	0.94862	0.99742	1	16109	0	-0.87554
RAB34	4	0.0028803	6.31e-06	0.000138	774	3	-0.74992	0.88179	0.98905	1	14854	0	-0.74992
KRR1	4	0.0028923	6.31e-06	0.000138	775	3	-0.69341	0.95781	0.99828	1	16299	0	-0.69341	0.0028923
EPN3	4	0.0029027	6.31e-06	0.000138	776	3	-0.82743	0.97192	0.99906	1	16648	0	-0.82743
SLU7	4	0.0029183	6.31e-06	0.000138	777	3	-1.0195	0.97154	0.99906	1	16638	0	-1.0195	0.0029183
SETD1A	4	0.0029237	6.31e-06	0.000138	778	2	-0.84914	0.97528	0.9992	1	16752	0	-0.84914
ISCU	4	0.0029346	6.31e-06	0.000138	779	2	-0.81318	0.036085	0.33021	1	1801	1	-0.81318	0.0029346
SDE2	4	0.0029383	6.31e-06	0.000138	780	3	-1.0996	0.89367	0.99	1	15062	0	-1.0996
DDX5	4	0.0029816	6.31e-06	0.000138	781	3	-0.78524	0.9738	0.9992	1	16715	0	-0.78524
CDC16	4	0.0029988	6.31e-06	0.000138	782	3	-0.76565	0.98549	0.99981	1	17029	0	-0.76565	0.0029988
TOMM70A	4	0.0030042	6.31e-06	0.000138	783	3	-0.79583	0.98021	0.99962	1	16870	0	-0.79583
RRM2	4	0.0030095	6.31e-06	0.000138	784	3	-0.89023	0.71622	0.94125	1	11927	0	-0.89023
RPL27A	4	0.0030262	6.31e-06	0.000138	785	3	-1.0125	0.63391	0.89429	1	10586	0	-1.0125	0.0030262
SRP54	4	0.0030524	6.31e-06	0.000138	786	3	-0.75857	0.95805	0.99828	1	16305	0	-0.75857
SLC30A9	4	0.0030551	6.31e-06	0.000138	787	3	-0.83937	0.83386	0.9742	1	13964	0	-0.83937
TLCD1	4	0.0030605	6.31e-06	0.000138	788	3	-0.73731	0.99071	0.99984	1	17201	0	-0.73731
PPP1CB	4	0.0030633	6.31e-06	0.000138	789	3	-0.93335	0.95966	0.99828	1	16355	0	-0.93335
RPL35A	3	0.0031041	2e-05	0.000402	790	3	-1.1405	0.9969	0.99998	1	17491	0	-1.1405	0.0031041
NUP188	4	0.0031117	6.31e-06	0.000138	791	2	-0.64835	0.9093	0.9917	1	15335	0	-0.64835
PABPN1	4	0.003132	6.31e-06	0.000138	792	3	-0.67758	0.99098	0.99984	1	17214	0	-0.67758
GTF2F1	4	0.0031738	6.31e-06	0.000138	793	3	-0.73752	0.89514	0.99	1	15086	0	-0.73752
EXOSC9	4	0.003189	6.31e-06	0.000138	794	3	-0.86368	0.9863	0.99981	1	17050	0	-0.86368
CCDC115	4	0.0031959	6.31e-06	0.000138	795	3	-0.68834	0.55123	0.86822	1	9330	1	-0.68834
MCM5	4	0.0032325	6.31e-06	0.000138	796	3	-0.80675	0.99865	1	1	17623	0	-0.80675	0.0032325
U2SURP	4	0.0032588	6.31e-06	0.000138	797	3	-0.77222	0.82975	0.9742	1	13899	0	-0.77222
OR5A1	4	0.0033252	6.31e-06	0.000138	798	3	-0.57962	0.97287	0.99906	1	16692	0	-0.57962
TNPO1	4	0.0033478	6.31e-06	0.000138	799	3	-0.98926	0.95917	0.99828	1	16343	0	-0.98926
NXPH3	4	0.0033538	6.31e-06	0.000138	800	3	-0.67104	0.99765	0.99999	1	17543	0	-0.67104
RPL7	3	0.00336	2e-05	0.000402	801	2	-1.375	0.783	0.95113	1	13064	0	-1.375
PTEN	4	0.0033681	6.31e-06	0.000138	802	3	-0.60357	0.6492	0.90436	1	10840	0	-0.60357
HTATSF1	4	0.0034114	6.31e-06	0.000138	803	3	-0.997	0.99764	0.99999	1	17542	0	-0.997
TCERG1	4	0.0034215	6.31e-06	0.000138	804	3	-0.76334	0.46736	0.83169	1	8252	1	-0.76334
TRAPPC13	4	0.0034288	6.31e-06	0.000138	805	3	-0.55363	0.95313	0.99742	1	16193	0	-0.55363
CMIP	4	0.003455	6.31e-06	0.000138	806	3	-0.90537	0.99882	1	1	17642	0	-0.90537
CTCF	4	0.0034572	6.31e-06	0.000138	807	2	-0.79065	0.9967	0.99998	1	17480	0	-0.79065
IARS	4	0.0034608	6.31e-06	0.000138	808	3	-0.64085	0.99561	0.99995	1	17418	0	-0.64085	0.0034608
KANSL1	4	0.0034623	6.31e-06	0.000138	809	3	-0.64022	0.76592	0.95625	1	12751	0	-0.64022
TNPO3	4	0.0034901	6.31e-06	0.000138	810	3	-0.74771	0.95751	0.99828	1	16292	0	-0.74771	0.0034901
MBNL1	4	0.003496	6.31e-06	0.000138	811	3	-0.67514	0.99728	0.99999	1	17517	0	-0.67514
COG1	4	0.0034975	6.31e-06	0.000138	812	3	-0.65541	0.98934	0.99984	1	17151	0	-0.65541
NKAP	4	0.0035078	6.31e-06	0.000138	813	3	-0.97623	0.91937	0.99374	1	15530	0	-0.97623	0.0035078
AFF4	4	0.003524	6.31e-06	0.000138	814	3	-0.56194	0.9421	0.99673	1	15982	0	-0.56194
ZBTB1	4	0.0035462	6.31e-06	0.000138	815	3	-0.73298	0.99557	0.99995	1	17416	0	-0.73298
OGT	4	0.0035563	6.31e-06	0.000138	816	3	-0.63945	0.94221	0.99673	1	15988	0	-0.63945	0.0035563
INTS1	4	0.0035879	6.31e-06	0.000138	817	3	-0.81874	0.99284	0.99988	1	17273	0	-0.81874	0.0035879
ZDHHC8	4	0.0036059	6.31e-06	0.000138	818	3	-0.714	0.99002	0.99984	1	17170	0	-0.714
SPOP	4	0.0036124	6.31e-06	0.000138	819	2	-0.70528	0.99724	0.99999	1	17512	0	-0.70528
SF3B1	4	0.0036204	6.31e-06	0.000138	820	3	-1.0533	0.99798	1	1	17573	0	-1.0533	0.0036204
TXNRD2	4	0.0036738	1.62e-05	0.00034	821	3	-0.71416	0.81669	0.97049	1	13661	0	-0.71416
PTPMT1	4	0.0036951	1.62e-05	0.00034	822	3	-0.65194	0.98947	0.99984	1	17157	0	-0.65194
TRAF2	4	0.0037549	1.62e-05	0.00034	823	3	-0.53482	0.82308	0.97049	1	13770	0	-0.53482
MMS19	4	0.0037708	1.62e-05	0.00034	824	2	-0.51788	0.91376	0.9917	1	15427	0	-0.51788
SOST	4	0.0037749	1.62e-05	0.00034	825	2	-0.2321	0.6802	0.9091	1	11332	0	-0.2321
CENPK	3	0.0038147	2e-05	0.000402	826	2	-1.065	0.10218	0.43826	1	3258	1	-1.065
MRGBP	4	0.0038246	1.62e-05	0.00034	827	3	-0.70152	0.97331	0.99906	1	16700	0	-0.70152
INTS3	4	0.0038293	1.62e-05	0.00034	828	3	-0.82344	0.81291	0.97049	1	13593	0	-0.82344	0.0038293
ATP6V1H	4	0.0038492	1.62e-05	0.00034	829	2	-0.63905	0.71819	0.94447	1	11956	0	-0.63905
KAT7	4	0.0038496	1.62e-05	0.00034	830	3	-0.72572	0.95451	0.99742	1	16233	0	-0.72572
HDAC3	4	0.0038527	1.62e-05	0.00034	831	3	-0.84158	0.94592	0.99673	1	16056	0	-0.84158	0.0038527
CDC5L	4	0.0038646	1.62e-05	0.00034	832	2	-0.73878	0.83896	0.9742	1	14062	0	-0.73878	0.0038646
NTMT1	4	0.0038778	1.62e-05	0.00034	833	3	-0.56431	0.99369	0.99988	1	17321	0	-0.56431
TRIM28	4	0.0038783	1.62e-05	0.00034	834	3	-0.80463	0.9005	0.9917	1	15184	0	-0.80463
CCDC94	4	0.0038967	1.62e-05	0.00034	835	3	-0.80947	0.9975	0.99999	1	17528	0	-0.80947	0.0038967
ZC3H13	3	0.0039101	2e-05	0.000402	836	3	-0.90867	0.99609	0.99998	1	17452	0	-0.90867
ATP6V0B	4	0.0039242	1.62e-05	0.00034	837	2	-0.62213	0.99278	0.99988	1	17269	0	-0.62213	0.0039242
HSP90AB1	4	0.0039522	1.62e-05	0.00034	838	3	-0.86412	0.9967	0.99998	1	17481	0	-0.86412
IDI1	4	0.003983	1.62e-05	0.00034	839	2	-0.49535	0.45907	0.82638	1	8151	1	-0.49535
SYT15	4	0.0039841	1.62e-05	0.00034	840	3	-0.81143	0.99747	0.99999	1	17526	0	-0.81143
XRCC3	4	0.0040001	1.62e-05	0.00034	841	3	-0.66648	0.76228	0.9535	1	12693	0	-0.66648
RPLP2	3	0.0040055	2e-05	0.000402	842	3	-0.40265	0.99599	0.99998	1	17442	0	-0.40265	0.0040055
ADSL	4	0.0040178	1.62e-05	0.00034	843	3	-0.85942	0.97503	0.9992	1	16742	0	-0.85942	0.0040178
TBKBP1	4	0.0040614	1.62e-05	0.00034	844	3	-0.57534	0.99473	0.99988	1	17376	0	-0.57534
AIF1L	4	0.004063	1.62e-05	0.00034	845	3	-0.73726	0.99613	0.99998	1	17454	0	-0.73726
ZC3H10	4	0.0040635	1.62e-05	0.00034	846	2	-0.6674	0.98006	0.99962	1	16866	0	-0.6674
NCF1	4	0.0041086	1.62e-05	0.00034	847	3	-0.81316	0.99458	0.99988	1	17364	0	-0.81316
SLBP	4	0.0041135	1.62e-05	0.00034	848	3	-0.6694	0.97944	0.99962	1	16845	0	-0.6694
GORASP2	4	0.0041216	1.62e-05	0.00034	849	3	-0.70353	0.30564	0.73743	1	6557	1	-0.70353
RPL10	3	0.0041305	2e-05	0.000402	850	2	-1.0345	0.49797	0.80058	1	8622	1	-1.0345
MRGPRD	4	0.0041479	1.62e-05	0.00034	851	3	-0.66734	0.99761	0.99999	1	17540	0	-0.66734
RPL18	4	0.0041533	1.62e-05	0.00034	852	3	-0.87456	0.98888	0.99984	1	17137	0	-0.87456	0.0041533
HYPK	4	0.0041561	1.62e-05	0.00034	853	3	-0.70975	0.92913	0.99544	1	15726	0	-0.70975	0.0041561
TRAPPC4	4	0.0041824	1.62e-05	0.00034	854	3	-0.67386	0.29109	0.72701	1	6405	1	-0.67386
MCTP1	4	0.0042272	1.67e-05	0.00034	855	3	-0.6717	0.99157	0.99988	1	17230	0	-0.6717
PCYT1A	4	0.0042354	1.67e-05	0.00034	856	2	-0.69665	0.87192	0.98355	1	14663	0	-0.69665
SNRPF	2	0.0042471	2.74e-07	1.3e-05	857	2	-1.5273	0.97375	0.99875	1	16713	0	-1.5273	0.0042471
CCDC120	4	0.0042538	1.67e-05	0.00034	858	3	-0.75511	0.8428	0.9742	1	14141	0	-0.75511
TOP2A	4	0.0042773	1.67e-05	0.00034	859	3	-0.51833	0.83296	0.9742	1	13950	0	-0.51833	0.0042773
ASTL	4	0.0043058	1.67e-05	0.00034	860	3	-0.66415	0.69977	0.92247	1	11667	0	-0.66415
CSE1L	4	0.0043152	1.67e-05	0.00034	861	2	-0.61899	0.97771	0.99962	1	16804	0	-0.61899	0.0043152
PSIP1	4	0.0043328	1.67e-05	0.00034	862	3	-0.94725	0.99852	1	1	17613	0	-0.94725
RTCB	4	0.0043345	1.67e-05	0.00034	863	3	-0.57049	0.9969	0.99998	1	17492	0	-0.57049	0.0043345
C2CD4D	4	0.0043531	1.67e-05	0.00034	864	3	-0.74909	0.99081	0.99984	1	17206	0	-0.74909
RCL1	4	0.0043548	1.67e-05	0.00034	865	3	-0.58	0.99782	1	1	17557	0	-0.58	0.0043548
SOAT1	4	0.0043717	1.67e-05	0.00034	866	3	-0.58157	0.7853	0.96388	1	13106	0	-0.58157
RPAIN	4	0.0043785	1.67e-05	0.00034	867	3	-0.79788	0.81633	0.97049	1	13657	0	-0.79788
ALS2CR12	4	0.0043956	1.67e-05	0.00034	868	3	-0.68302	0.97702	0.99962	1	16787	0	-0.68302
USP8	4	0.0043973	1.67e-05	0.00034	869	3	-0.63957	0.99202	0.99988	1	17246	0	-0.63957
U2AF1	4	0.0044109	1.67e-05	0.00034	870	3	-0.96299	0.922	0.99431	1	15588	0	-0.96299	0.0044109
BIN2	3	0.004414	3.54e-05	0.00069	871	2	-1.0731	0.78316	0.95113	1	13068	0	-1.0731
SLC5A6	4	0.0044779	1.67e-05	0.00034	872	3	-0.61688	0.96862	0.9989	1	16571	0	-0.61688
MS4A4E	4	0.0044917	1.67e-05	0.00034	873	3	-0.68029	0.97966	0.99962	1	16852	0	-0.68029
INTS7	4	0.0044952	1.67e-05	0.00034	874	3	-0.77085	0.98661	0.99981	1	17057	0	-0.77085
GLS	4	0.0045334	1.67e-05	0.00034	875	3	-0.51203	0.98391	0.99969	1	16968	0	-0.51203
NELFB	4	0.0045403	1.67e-05	0.00034	876	3	-0.68863	0.99353	0.99988	1	17310	0	-0.68863	0.0045403
NAA15	4	0.004594	1.67e-05	0.00034	877	3	-1.0611	0.86863	0.98223	1	14615	0	-1.0611
SPCS2	4	0.0046226	1.67e-05	0.00034	878	3	-0.78175	0.93432	0.99544	1	15832	0	-0.78175
ATOH8	4	0.0046297	1.67e-05	0.00034	879	3	-0.61334	0.99345	0.99988	1	17308	0	-0.61334
S100A11	2	0.0046747	5.07e-05	0.000916	880	2	-0.63027	0.99533	0.99995	1	17407	0	-0.63027
SOX10	4	0.0046881	1.67e-05	0.00034	881	3	-0.53716	0.95646	0.99774	1	16267	0	-0.53716
RBBP8	4	0.004697	1.67e-05	0.00034	882	3	-0.66347	0.42479	0.79501	1	7750	1	-0.66347
PLEKHM1	4	0.0047148	1.67e-05	0.00034	883	3	-0.80625	0.97123	0.99906	1	16628	0	-0.80625
CACYBP	4	0.004735	1.67e-05	0.00034	884	2	-0.46963	0.87405	0.98477	1	14702	0	-0.46963
ZNHIT2	4	0.0047717	1.67e-05	0.00034	885	3	-0.96914	0.89901	0.9917	1	15160	0	-0.96914
MLLT1	4	0.0047721	1.67e-05	0.00034	886	3	-0.70741	0.98962	0.99984	1	17160	0	-0.70741
CENPT	4	0.0047974	3.76e-05	0.00069	887	3	-0.74833	0.92578	0.99491	1	15657	0	-0.74833
POLR2K	3	0.0047985	3.59e-05	0.00069	888	2	-0.94594	0.66727	0.90416	1	11131	0	-0.94594
INTS2	4	0.0048039	3.76e-05	0.00069	889	3	-0.93805	0.9687	0.9989	1	16574	0	-0.93805
ANKRA2	4	0.0048245	3.76e-05	0.00069	890	3	-0.60917	0.85956	0.98085	1	14457	0	-0.60917
NIP7	4	0.004878	3.76e-05	0.00069	891	3	-0.96444	0.99645	0.99998	1	17468	0	-0.96444	0.004878
SNAPC3	4	0.0048808	3.76e-05	0.00069	892	3	-0.7326	0.99373	0.99988	1	17323	0	-0.7326
IL1A	4	0.0048863	3.76e-05	0.00069	893	3	-0.77298	0.5704	0.87339	1	9609	1	-0.77298
UPF2	4	0.0048991	3.76e-05	0.00069	894	3	-0.93015	0.90187	0.9917	1	15209	0	-0.93015	0.0048991
CLPP	4	0.0049101	3.76e-05	0.00069	895	3	-0.62512	0.97697	0.99962	1	16785	0	-0.62512
PLEKHD1	4	0.0049346	3.76e-05	0.00069	896	3	-0.60576	0.92916	0.99544	1	15728	0	-0.60576
2006-03-01	4	0.0049597	3.76e-05	0.00069	897	3	-0.64503	0.99471	0.99988	1	17374	0	-0.64503
NRDE2	4	0.0049763	3.76e-05	0.00069	898	3	-0.93613	0.99596	0.99997	1	17439	0	-0.93613
TUBGCP4	4	0.00503	3.76e-05	0.00069	899	3	-0.67093	0.98903	0.99984	1	17140	0	-0.67093
CFDP1	4	0.0050655	3.76e-05	0.00069	900	3	-0.6311	0.99684	0.99998	1	17488	0	-0.6311
MZT1	2	0.0050669	5.07e-05	0.000916	901	2	-1.336	0.99493	0.99995	1	17388	0	-1.336
GEMIN5	4	0.0050898	3.76e-05	0.00069	902	3	-0.54877	0.55994	0.86822	1	9446	1	-0.54877	0.0050898
C17orf82	4	0.0050935	3.76e-05	0.00069	903	3	-0.54016	0.99856	1	1	17619	0	-0.54016
TBX21	4	0.0051217	3.76e-05	0.00069	904	3	-0.7641	0.99725	0.99999	1	17513	0	-0.7641
VPS72	4	0.0051613	3.76e-05	0.00069	905	3	-0.62136	0.98114	0.99962	1	16896	0	-0.62136
CCDC58	1	0.0051768	2.74e-07	1.3e-05	906	1	-1.5034	0.99482	1	1	17383	0	-1.5034
NUP43	4	0.0052049	3.76e-05	0.00069	907	3	-0.77521	0.6957	0.92247	1	11597	0	-0.77521
FAM89B	4	0.0052316	3.76e-05	0.00069	908	3	-0.62606	0.19301	0.63644	1	5237	1	-0.62606
PRMT5	4	0.0052335	3.76e-05	0.00069	909	3	-0.55298	0.98179	0.99962	1	16914	0	-0.55298	0.0052335
NOP58	4	0.0052468	3.76e-05	0.00069	910	2	-0.43024	0.98216	0.99962	1	16926	0	-0.43024
YAE1D1	4	0.0052756	3.76e-05	0.00069	911	3	-0.567	0.99805	1	1	17578	0	-0.567
CTDP1	4	0.0053121	3.76e-05	0.00069	912	3	-0.61452	0.22811	0.66436	1	5831	1	-0.61452	0.0053121
CYB561A3	4	0.0053179	3.76e-05	0.00069	913	3	-0.69476	0.99167	0.99988	1	17235	0	-0.69476
RBMX	1	0.0053321	2.74e-07	1.3e-05	914	1	-1.9452	0.99467	1	1	17369	0	-1.9452	0.0053321
SLX4	4	0.0053386	3.76e-05	0.00069	915	2	-0.51305	0.99086	0.99984	1	17209	0	-0.51305
WDR74	4	0.005345	3.76e-05	0.00069	916	3	-0.86392	0.99159	0.99988	1	17231	0	-0.86392	0.005345
PFDN1	4	0.0053624	3.76e-05	0.00069	917	3	-0.47151	0.26395	0.71148	1	6147	1	-0.47151
GAPDH	4	0.0053721	3.76e-05	0.00069	918	3	-0.65759	0.95455	0.99742	1	16234	0	-0.65759	0.0053721
SF3A2	4	0.0054019	3.76e-05	0.00069	919	3	-0.38875	0.99868	1	1	17626	0	-0.38875	0.0054019
NSL1	4	0.0054051	3.76e-05	0.00069	920	3	-0.7051	0.78413	0.95889	1	13087	0	-0.7051
CLDN6	4	0.005409	3.76e-05	0.00069	921	3	-0.64285	0.86441	0.98223	1	14542	0	-0.64285
DNAJC4	4	0.0054364	3.76e-05	0.00069	922	3	-0.72591	0.91296	0.9917	1	15411	0	-0.72591
MICAL3	4	0.0054383	3.76e-05	0.00069	923	3	-0.68683	0.98196	0.99962	1	16919	0	-0.68683
COA5	4	0.0054422	3.76e-05	0.00069	924	3	-0.66815	0.9182	0.99374	1	15511	0	-0.66815	0.0054422
FAM96B	4	0.0054481	3.76e-05	0.00069	925	3	-0.75978	0.97984	0.99962	1	16859	0	-0.75978	0.0054481
KIAA1614	4	0.0054606	3.76e-05	0.00069	926	2	-0.3493	0.24514	0.70094	1	5983	1	-0.3493
DHX40	4	0.0054854	3.76e-05	0.00069	927	3	-0.63692	0.92046	0.99374	1	15555	0	-0.63692
EFNA3	4	0.0054893	3.76e-05	0.00069	928	3	-0.55967	0.94781	0.99742	1	16096	0	-0.55967
KAT8	4	0.0054952	3.76e-05	0.00069	929	3	-0.6323	0.70526	0.93053	1	11751	0	-0.6323	0.0054952
SEC13	4	0.0055048	3.76e-05	0.00069	930	2	-0.5275	0.038446	0.34066	1	1871	1	-0.5275	0.0055048
TMEM131	4	0.0055387	3.76e-05	0.00069	931	3	-0.6675	0.95351	0.99742	1	16202	0	-0.6675
UBR4	4	0.0055446	3.76e-05	0.00069	932	3	-0.60837	0.91498	0.99242	1	15443	0	-0.60837
SENP2	4	0.0055466	3.76e-05	0.00069	933	3	-0.69986	0.97203	0.99906	1	16651	0	-0.69986
PITPNM1	4	0.0055983	3.76e-05	0.00069	934	3	-0.57689	0.99775	1	1	17551	0	-0.57689
MTPAP	4	0.0056003	3.76e-05	0.00069	935	3	-0.807	0.99606	0.99997	1	17449	0	-0.807
CAPN5	4	0.0056222	3.76e-05	0.00069	936	3	-0.55343	0.90934	0.9917	1	15337	0	-0.55343
PPCS	4	0.0056382	3.76e-05	0.00069	937	3	-0.80016	0.95315	0.99742	1	16194	0	-0.80016
PGK1	4	0.0057025	3.81e-05	0.00069	938	3	-0.84836	0.63865	0.89429	1	10659	0	-0.84836	0.0057025
PPP1R8	4	0.0057086	3.81e-05	0.00069	939	3	-0.51437	0.77354	0.95625	1	12882	0	-0.51437
TTI2	4	0.0057126	3.81e-05	0.00069	940	3	-0.69741	0.96333	0.99828	1	16450	0	-0.69741	0.0057126
PSMB6	4	0.0057734	3.81e-05	0.00069	941	3	-0.65883	0.96734	0.99851	1	16531	0	-0.65883
EEF1G	4	0.0057787	3.81e-05	0.00069	942	3	-0.70951	0.96319	0.99828	1	16447	0	-0.70951
ELK1	4	0.0057937	3.81e-05	0.00069	943	3	-0.69172	0.74853	0.9535	1	12452	0	-0.69172
CRYBB1	4	0.0058019	3.81e-05	0.00069	944	3	-0.56702	0.46888	0.83169	1	8273	1	-0.56702
MYRF	4	0.0058141	3.81e-05	0.00069	945	3	-0.58346	0.86776	0.98223	1	14600	0	-0.58346
TLK2	4	0.0058292	3.81e-05	0.00069	946	3	-0.77601	0.80561	0.96618	1	13482	0	-0.77601
MED31	4	0.0058349	3.81e-05	0.00069	947	3	-0.51433	0.99496	0.99993	1	17391	0	-0.51433
SLC13A2	4	0.0058633	3.81e-05	0.00069	948	3	-0.55716	0.88498	0.98906	1	14913	0	-0.55716
SERPINC1	4	0.0059085	3.81e-05	0.00069	949	3	-0.63214	0.99832	1	1	17599	0	-0.63214
CXorf56	4	0.0059104	3.81e-05	0.00069	950	2	-0.7069	0.98314	0.99969	1	16947	0	-0.7069
PSMC3	4	0.0059461	3.81e-05	0.00069	951	2	-0.83946	0.99423	0.99988	1	17347	0	-0.83946	0.0059461
PI4KB	4	0.0059474	3.81e-05	0.00069	952	2	-0.2277	0.2429	0.69569	1	5963	1	-0.2277
CECR2	4	0.0059582	3.81e-05	0.00069	953	3	-0.68043	0.56076	0.86822	1	9457	1	-0.68043
THAP7	4	0.0059727	3.81e-05	0.00069	954	3	-0.7604	0.87535	0.98593	1	14730	0	-0.7604
MAK16	4	0.0059922	3.81e-05	0.00069	955	2	-0.58797	0.77993	0.95625	1	13003	0	-0.58797	0.0059922
CCNH	4	0.0060102	3.81e-05	0.00069	956	3	-0.73512	0.99452	0.99988	1	17362	0	-0.73512	0.0060102
KDM1A	4	0.0060709	3.81e-05	0.00069	957	3	-0.74379	0.068749	0.38687	1	2533	1	-0.74379
ACVR1B	4	0.0061024	3.81e-05	0.00069	958	3	-0.49966	0.99347	0.99988	1	17309	0	-0.49966
KDM2A	4	0.0061313	3.81e-05	0.00069	959	3	-0.70881	0.97581	0.9992	1	16762	0	-0.70881
EXOSC6	4	0.0061404	3.81e-05	0.00069	960	3	-0.83303	0.87102	0.98223	1	14654	0	-0.83303	0.0061404
ZDHHC5	4	0.0061469	3.81e-05	0.00069	961	3	-0.80836	0.4633	0.83169	1	8208	1	-0.80836
CDIPT	4	0.0061625	3.81e-05	0.00069	962	2	-0.88507	0.99536	0.99995	1	17409	0	-0.88507
RTFDC1	4	0.0061724	3.81e-05	0.00069	963	2	-0.76364	0.82228	0.97049	1	13758	0	-0.76364
TUBD1	4	0.006202	3.81e-05	0.00069	964	3	-0.57164	0.4341	0.79501	1	7852	1	-0.57164
DHX37	4	0.006251	3.81e-05	0.00069	965	3	-0.66455	0.84354	0.97771	1	14160	0	-0.66455	0.006251
PGD	4	0.0062563	3.81e-05	0.00069	966	2	-0.74048	0.98361	0.99969	1	16954	0	-0.74048
ABCC3	4	0.0062617	3.81e-05	0.00069	967	3	-0.54173	0.9975	0.99999	1	17531	0	-0.54173
FBXL12	4	0.006272	3.81e-05	0.00069	968	2	-0.21261	0.36621	0.74783	1	7143	1	-0.21261
POLE	4	0.0062939	3.81e-05	0.00069	969	3	-0.75081	0.90455	0.9917	1	15254	0	-0.75081
TSPAN16	4	0.0063068	3.81e-05	0.00069	970	3	-0.7522	0.99682	0.99998	1	17485	0	-0.7522
CPSF1	4	0.0063154	3.81e-05	0.00069	971	3	-0.53417	0.95976	0.99828	1	16357	0	-0.53417	0.0063154
NUBP1	4	0.0063403	3.81e-05	0.00069	972	3	-0.66179	0.90567	0.9917	1	15272	0	-0.66179
CDC37	4	0.0063561	3.81e-05	0.00069	973	2	-0.64727	0.31454	0.73743	1	6637	1	-0.64727	0.0063561
FAM214B	4	0.0063564	3.81e-05	0.00069	974	3	-0.53413	0.99808	1	1	17583	0	-0.53413
EIF4ENIF1	4	0.0063911	3.81e-05	0.00069	975	3	-0.50697	0.58718	0.87864	1	9861	1	-0.50697
NADSYN1	4	0.0064041	3.81e-05	0.00069	976	3	-0.73647	0.29022	0.72701	1	6398	1	-0.73647
EML3	4	0.0064106	3.81e-05	0.00069	977	3	-0.54954	0.95835	0.99828	1	16314	0	-0.54954
CWC25	4	0.0064455	3.81e-05	0.00069	978	3	-0.60711	0.99658	0.99998	1	17473	0	-0.60711
RPL27	2	0.0064515	5.07e-05	0.000916	979	2	-1.0548	0.99355	0.99995	1	17313	0	-1.0548	0.0064515
DCTN6	4	0.0064535	3.81e-05	0.00069	980	2	-0.4094	0.9652	0.99828	1	16482	0	-0.4094
SLC7A4	4	0.0064673	3.81e-05	0.00069	981	3	-0.65599	0.99219	0.99988	1	17255	0	-0.65599
TOPBP1	4	0.0064717	3.81e-05	0.00069	982	3	-0.71522	0.55767	0.86822	1	9414	1	-0.71522
RCOR2	4	0.006478	3.81e-05	0.00069	983	3	-0.65222	0.98866	0.99984	1	17126	0	-0.65222
ERCC2	4	0.0064783	3.81e-05	0.00069	984	3	-0.77305	0.94626	0.99673	1	16066	0	-0.77305	0.0064783
CD300LG	4	0.0065112	3.81e-05	0.00069	985	3	-0.55208	0.99709	0.99998	1	17503	0	-0.55208
YRDC	4	0.0065134	3.81e-05	0.00069	986	3	-0.68649	0.99546	0.99995	1	17414	0	-0.68649	0.0065134
TIMM10	4	0.0065375	3.81e-05	0.00069	987	3	-0.7221	0.90696	0.9917	1	15302	0	-0.7221	0.0065375
PIGR	4	0.0066105	9.08e-05	0.00126	988	3	-0.5866	0.88351	0.98905	1	14888	0	-0.5866
ELL	4	0.0066304	9.08e-05	0.00126	989	3	-0.64966	0.99638	0.99998	1	17464	0	-0.64966	0.0066304
TBC1D29	4	0.0066638	9.08e-05	0.00126	990	3	-0.44179	0.65986	0.90436	1	11013	0	-0.44179
RPS2	4	0.0066661	9.08e-05	0.00126	991	3	-0.63788	0.99632	0.99998	1	17461	0	-0.63788	0.0066661
PDCD10	4	0.0066683	9.08e-05	0.00126	992	3	-0.55249	0.99133	0.99988	1	17225	0	-0.55249
VPS35	4	0.0066978	9.08e-05	0.00126	993	3	-0.27538	0.98115	0.99962	1	16897	0	-0.27538
TAF5L	4	0.0067421	9.08e-05	0.00126	994	3	-0.69434	0.99792	1	1	17565	0	-0.69434
SF3B2	4	0.0067574	9.08e-05	0.00126	995	2	-0.68485	0.93658	0.99544	1	15870	0	-0.68485	0.0067574
KIAA0907	4	0.0067846	9.08e-05	0.00126	996	2	-0.70802	0.9934	0.99988	1	17306	0	-0.70802
PSMC2	4	0.0067955	9.08e-05	0.00126	997	3	-0.66225	0.99216	0.99988	1	17253	0	-0.66225	0.0067955
GNLY	4	0.0068445	9.08e-05	0.00126	998	2	-0.36353	0.42624	0.79501	1	7765	1	-0.36353
GSC2	4	0.0068609	9.08e-05	0.00126	999	2	-0.46641	0.98652	0.99981	1	17055	0	-0.46641
POLR2B	4	0.0068773	9.08e-05	0.00126	1000	3	-0.86501	0.99355	0.99988	1	17314	0	-0.86501	0.0068773
HGS	4	0.0068828	9.08e-05	0.00126	1001	2	-0.84438	0.79713	0.96388	1	13342	0	-0.84438
CLASRP	4	0.0069119	9.08e-05	0.00126	1002	3	-0.58126	0.97018	0.9989	1	16607	0	-0.58126
CCDC47	4	0.0069165	9.08e-05	0.00126	1003	3	-0.70229	0.9987	1	1	17628	0	-0.70229
KRT86	4	0.0069302	9.08e-05	0.00126	1004	3	-0.56632	0.82163	0.97049	1	13737	0	-0.56632
NOS2	4	0.0069322	9.08e-05	0.00126	1005	2	-0.54372	0.86431	0.98223	1	14537	0	-0.54372
MIS18BP1	4	0.0069325	9.08e-05	0.00126	1006	3	-0.55981	0.99375	0.99988	1	17324	0	-0.55981
STIP1	4	0.006937	9.08e-05	0.00126	1007	3	-0.64256	0.98053	0.99962	1	16883	0	-0.64256
OR4D11	4	0.0069622	9.08e-05	0.00126	1008	3	-0.58791	0.9951	0.99993	1	17395	0	-0.58791
MALL	4	0.0069783	9.08e-05	0.00126	1009	3	-0.50857	0.99497	0.99993	1	17392	0	-0.50857
NDUFA11	4	0.0070059	9.08e-05	0.00126	1010	3	-0.53316	0.93426	0.99544	1	15830	0	-0.53316
RTF1	4	0.0070259	9.08e-05	0.00126	1011	2	-0.2722	0.19726	0.6451	1	5328	2	-0.2722
ANAPC13	4	0.0070312	9.08e-05	0.00126	1012	3	-0.74479	0.99867	1	1	17625	0	-0.74479
SEMA4C	4	0.0070813	9.08e-05	0.00126	1013	2	-0.73033	0.31356	0.73743	1	6631	1	-0.73033
RNPS1	4	0.0071007	9.08e-05	0.00126	1014	3	-0.66532	0.99493	0.9999	1	17387	0	-0.66532
CMA1	4	0.0071481	9.08e-05	0.00126	1015	2	-0.51003	0.98456	0.99975	1	16999	0	-0.51003
CNGA3	4	0.0071565	9.08e-05	0.00126	1016	3	-0.89499	0.99367	0.99988	1	17318	0	-0.89499
RBM14	4	0.0071983	9.08e-05	0.00126	1017	3	-0.80527	0.99571	0.99995	1	17426	0	-0.80527	0.0071983
CLDN25	4	0.0072291	9.08e-05	0.00126	1018	3	-0.40558	0.97241	0.99906	1	16671	0	-0.40558
UGT1A5	1	0.007239	2.74e-07	1.3e-05	1019	1	-0.77574	0.99276	1	1	17268	0	-0.77574
SSH3	4	0.00726	9.08e-05	0.00126	1020	2	-0.63378	0.97866	0.99962	1	16820	0	-0.63378
SETD2	4	0.0073162	9.08e-05	0.00126	1021	3	-0.76118	0.15233	0.59097	1	4344	1	-0.76118
HSCB	4	0.0073282	9.08e-05	0.00126	1022	3	-0.69483	0.99118	0.99984	1	17221	0	-0.69483
DKC1	4	0.0073332	9.08e-05	0.00126	1023	3	-0.63916	0.95736	0.99828	1	16287	0	-0.63916	0.0073332
CNOT3	4	0.0073971	9.08e-05	0.00126	1024	3	-0.53626	0.50972	0.863	1	8762	1	-0.53626	0.0073971
NUP160	4	0.0074124	9.08e-05	0.00126	1025	2	-0.55875	0.832	0.9742	1	13936	0	-0.55875	0.0074124
NDUFA1	4	0.0074377	9.08e-05	0.00126	1026	3	-0.54976	0.47851	0.84216	1	8381	1	-0.54976
DHX58	4	0.0074472	9.08e-05	0.00126	1027	3	-0.5306	0.99071	0.99984	1	17202	0	-0.5306
SIGLEC6	4	0.0074832	9.08e-05	0.00126	1028	3	-0.59736	0.53513	0.863	1	9116	1	-0.59736
VPREB1	4	0.0074976	9.08e-05	0.00126	1029	3	-0.5779	0.63707	0.89429	1	10629	0	-0.5779
ARPC4	4	0.0075096	9.08e-05	0.00126	1030	3	-0.48579	0.7804	0.95625	1	13014	0	-0.48579
RNASEK	4	0.0075205	9.08e-05	0.00126	1031	2	-0.54061	0.39667	0.77405	1	7466	1	-0.54061
TLK1	4	0.0075377	9.08e-05	0.00126	1032	2	-0.45754	0.95252	0.99742	1	16176	0	-0.45754
GINS2	4	0.0075663	9.08e-05	0.00126	1033	3	-0.73143	0.93723	0.99591	1	15878	0	-0.73143	0.0075663
C11orf83	4	0.0075892	9.08e-05	0.00126	1034	3	-0.6445	0.99431	0.99988	1	17354	0	-0.6445
DHX16	4	0.0076064	9.08e-05	0.00126	1035	2	-0.3345	0.66307	0.9091	1	11066	0	-0.3345
SARNP	4	0.007633	9.08e-05	0.00126	1036	3	-0.80529	0.042554	0.34066	1	1966	1	-0.80529
SGCA	4	0.0077258	9.08e-05	0.00126	1037	3	-0.49677	0.99299	0.99988	1	17288	0	-0.49677
ARF4	4	0.0077275	9.08e-05	0.00126	1038	2	-0.45761	0.40945	0.77406	1	7594	1	-0.45761
PRPF3	4	0.0077282	9.08e-05	0.00126	1039	3	-0.69507	0.93041	0.99544	1	15756	0	-0.69507
POLR3K	4	0.0077331	9.08e-05	0.00126	1040	3	-0.58932	0.98671	0.99981	1	17062	0	-0.58932	0.0077331
CCL17	4	0.0077506	9.08e-05	0.00126	1041	2	-0.087772	0.93578	0.99544	1	15864	0	-0.087772
COL11A2	4	0.0077854	9.08e-05	0.00126	1042	2	-0.50596	0.32739	0.7426	1	6764	1	-0.50596
TCP10L	4	0.0077921	9.08e-05	0.00126	1043	3	-0.55458	0.78575	0.96388	1	13114	0	-0.55458
TFG	4	0.0077946	9.08e-05	0.00126	1044	3	-0.62259	0.98637	0.99981	1	17052	0	-0.62259
RPL11	4	0.0078341	9.08e-05	0.00126	1045	3	-0.83587	0.96382	0.99828	1	16457	0	-0.83587	0.0078341
YIPF5	4	0.0078377	9.08e-05	0.00126	1046	2	-0.50302	0.79982	0.96388	1	13393	0	-0.50302
CBFB	4	0.0079234	9.08e-05	0.00126	1047	3	-0.6114	0.99697	0.99998	1	17496	0	-0.6114
UQCRFS1	4	0.0079833	9.08e-05	0.00126	1048	3	-0.64592	0.99879	1	1	17638	0	-0.64592	0.0079833
TEN1	4	0.0080109	9.08e-05	0.00126	1049	3	-0.74935	0.55058	0.86822	1	9322	1	-0.74935
DDX59	3	0.0080582	0.00010722	0.001479	1050	2	-0.67983	0.98006	0.99885	1	16867	0	-0.67983
WAC	4	0.0080662	9.08e-05	0.00126	1051	3	-0.57939	0.87401	0.98477	1	14701	0	-0.57939
AIFM3	4	0.0080783	9.08e-05	0.00126	1052	2	-0.74101	0.85242	0.97933	1	14333	0	-0.74101
CIB3	4	0.0081019	9.08e-05	0.00126	1053	2	-0.6065	0.92185	0.99431	1	15584	0	-0.6065
SCARF2	4	0.0081116	9.08e-05	0.00126	1054	3	-0.79642	0.15945	0.59916	1	4500	1	-0.79642
TANGO6	4	0.0081137	9.08e-05	0.00126	1055	2	-0.71294	0.82573	0.97235	1	13819	0	-0.71294	0.0081137
NXT1	4	0.0081445	9.08e-05	0.00126	1056	3	-0.58732	0.99645	0.99998	1	17469	0	-0.58732
HIP1R	4	0.0081725	9.08e-05	0.00126	1057	3	-0.53187	0.94302	0.99673	1	16002	0	-0.53187
TRIAP1	4	0.008179	9.08e-05	0.00126	1058	2	-0.56813	0.80498	0.96618	1	13474	0	-0.56813	0.008179
MED19	4	0.0081954	9.08e-05	0.00126	1059	3	-0.66071	0.60482	0.88382	1	10128	1	-0.66071
FOXI1	4	0.0082183	9.08e-05	0.00126	1060	3	-0.49018	0.32587	0.7426	1	6754	1	-0.49018
NUDC	4	0.0082385	9.08e-05	0.00126	1061	2	-0.43498	0.62862	0.89429	1	10492	1	-0.43498	0.0082385
ERCC3	4	0.0082564	9.08e-05	0.00126	1062	2	-0.77031	0.95804	0.99828	1	16304	0	-0.77031	0.0082564
CRYBB3	4	0.008277	9.08e-05	0.00126	1063	3	-0.5583	0.96167	0.99828	1	16406	0	-0.5583
FBXO21	4	0.0083825	9.08e-05	0.00126	1064	3	-0.52162	0.33715	0.74783	1	6850	1	-0.52162
RBBP5	4	0.0083882	9.08e-05	0.00126	1065	3	-0.61036	0.99399	0.99988	1	17334	0	-0.61036
URM1	4	0.0084183	9.08e-05	0.00126	1066	2	-0.51004	0.74991	0.9535	1	12473	0	-0.51004
RAD51	4	0.0084304	9.08e-05	0.00126	1067	2	-0.18759	0.15568	0.59916	1	4420	2	-0.18759
RANBP17	4	0.0084342	9.08e-05	0.00126	1068	3	-0.56766	0.8571	0.98085	1	14413	0	-0.56766
SMARCA4	4	0.0084485	9.08e-05	0.00126	1069	2	-0.39784	0.92201	0.99431	1	15589	0	-0.39784
C1orf74	4	0.0084606	9.08e-05	0.00126	1070	3	-0.7539	0.9893	0.99984	1	17149	0	-0.7539
GPC6	4	0.0084731	9.08e-05	0.00126	1071	3	-0.47381	0.98538	0.99981	1	17025	0	-0.47381
NEK8	4	0.0084783	9.08e-05	0.00126	1072	3	-0.55442	0.9974	0.99999	1	17522	0	-0.55442
PKM	4	0.0084787	9.08e-05	0.00126	1073	2	-0.53054	0.36316	0.74783	1	7120	1	-0.53054
PSMD12	4	0.0084888	9.08e-05	0.00126	1074	3	-0.56398	0.91549	0.99242	1	15456	0	-0.56398	0.0084888
PRDX5	4	0.0084914	9.08e-05	0.00126	1075	3	-0.5781	0.99521	0.99995	1	17402	0	-0.5781
HAP1	4	0.0085018	9.08e-05	0.00126	1076	3	-0.65926	0.85513	0.98085	1	14376	0	-0.65926
CAMK2G	4	0.0085029	9.08e-05	0.00126	1077	2	-0.30478	0.034263	0.32527	1	1732	2	-0.30478
KAT5	4	0.0085322	9.08e-05	0.00126	1078	2	-0.71878	0.46295	0.83169	1	8201	1	-0.71878
GFI1B	4	0.0085357	9.08e-05	0.00126	1079	3	-0.61782	0.99427	0.99988	1	17350	0	-0.61782
TGM5	4	0.0085985	9.08e-05	0.00126	1080	3	-0.26122	0.85496	0.98085	1	14374	0	-0.26122
CNOT11	4	0.0086116	9.08e-05	0.00126	1081	3	-0.49246	0.38941	0.76888	1	7379	1	-0.49246
SUSD2	4	0.0086976	9.08e-05	0.00126	1082	2	-0.5179	0.80982	0.96838	1	13548	0	-0.5179
KCNH4	4	0.0087092	9.08e-05	0.00126	1083	3	-0.57973	0.88952	0.99	1	14983	0	-0.57973
NAA20	4	0.0087489	9.08e-05	0.00126	1084	3	-0.60767	0.11536	0.53958	1	3550	1	-0.60767
PTPN1	4	0.0087589	9.08e-05	0.00126	1085	2	-0.62606	0.97982	0.99962	1	16858	0	-0.62606
C19orf59	4	0.008765	9.08e-05	0.00126	1086	2	-0.39448	0.16736	0.61957	1	4679	1	-0.39448
XPNPEP3	4	0.0088048	9.08e-05	0.00126	1087	3	-0.54964	0.65931	0.90436	1	11003	0	-0.54964
NDC1	4	0.0088128	9.08e-05	0.00126	1088	3	-0.47717	0.66933	0.9091	1	11159	0	-0.47717
CARD10	4	0.0088181	9.08e-05	0.00126	1089	3	-0.60286	0.64586	0.8994	1	10782	0	-0.60286
KIF23	4	0.0088689	9.08e-05	0.00126	1090	3	-0.52837	0.7574	0.9535	1	12603	0	-0.52837	0.0088689
EIF3I	4	0.0088796	9.08e-05	0.00126	1091	3	-0.61123	0.96986	0.9989	1	16601	0	-0.61123	0.0088796
PPIL4	4	0.0088882	9.08e-05	0.00126	1092	2	-0.64649	0.31202	0.73743	1	6613	1	-0.64649
NVL	4	0.0089817	9.08e-05	0.00126	1093	3	-0.647	0.99531	0.99995	1	17405	0	-0.647	0.0089817
NAA40	4	0.0090196	9.08e-05	0.00126	1094	3	-0.65586	0.9978	1	1	17555	0	-0.65586
MTCH1	4	0.0090304	9.08e-05	0.00126	1095	3	-0.58507	0.95001	0.99742	1	16126	0	-0.58507
EIF2B4	4	0.0091058	9.08e-05	0.00126	1096	2	-0.36975	0.90501	0.9917	1	15258	0	-0.36975
MED29	4	0.0091119	9.08e-05	0.00126	1097	3	-0.66343	0.42097	0.7845	1	7713	1	-0.66343
MEPCE	4	0.0091446	9.08e-05	0.00126	1098	3	-0.78362	0.96789	0.9989	1	16551	0	-0.78362	0.0091446
SNRNP70	4	0.0091496	9.08e-05	0.00126	1099	2	-0.42101	0.68534	0.91818	1	11420	0	-0.42101	0.0091496
ATP6V1E1	4	0.0091828	9.08e-05	0.00126	1100	3	-0.51922	0.99828	1	1	17596	0	-0.51922	0.0091828
PHLDB2	4	0.0092124	9.08e-05	0.00126	1101	3	-0.67966	0.51269	0.863	1	8797	1	-0.67966
STAT6	4	0.0092267	9.08e-05	0.00126	1102	3	-0.5311	0.9943	0.99988	1	17353	0	-0.5311
RAB5C	4	0.0092459	9.08e-05	0.00126	1103	3	-0.62089	0.97343	0.99906	1	16705	0	-0.62089
PPP2CA	4	0.0092564	9.08e-05	0.00126	1104	2	-0.60325	0.9973	0.99999	1	17518	0	-0.60325	0.0092564
ACTR3	4	0.0092734	9.08e-05	0.00126	1105	3	-0.55469	0.99756	0.99999	1	17536	0	-0.55469
MCFD2	4	0.00929	9.08e-05	0.00126	1106	3	-0.52663	0.99444	0.99988	1	17360	0	-0.52663
CADM2	4	0.0093259	9.08e-05	0.00126	1107	3	-0.54283	0.52163	0.863	1	8923	1	-0.54283
PRKD1	4	0.0093259	9.08e-05	0.00126	1108	3	-0.52079	0.82763	0.9742	1	13851	0	-0.52079
DDX21	4	0.0093448	9.08e-05	0.00126	1109	2	-0.63238	0.99061	0.99984	1	17195	0	-0.63238	0.0093448
SEPHS1	4	0.0093618	9.08e-05	0.00126	1110	3	-0.69558	0.99252	0.99988	1	17266	0	-0.69558
RBM25	4	0.0093646	9.08e-05	0.00126	1111	3	-0.63218	0.89609	0.99	1	15103	0	-0.63218
COX18	4	0.0094019	9.08e-05	0.00126	1112	2	0.056149	0.68742	0.92247	1	11456	0	0.056149
PYGM	4	0.0094463	9.08e-05	0.00126	1113	2	-0.39963	0.86348	0.98223	1	14522	0	-0.39963
CNTD1	4	0.009448	9.08e-05	0.00126	1114	3	-0.58306	0.11803	0.54788	1	3613	1	-0.58306
PLAC1L	3	0.0095003	0.00010777	0.001483	1115	2	-0.70255	0.24663	0.60811	1	5993	1	-0.70255
MAP3K11	4	0.009515	9.08e-05	0.00126	1116	3	-0.56802	0.98535	0.99981	1	17024	0	-0.56802
ARL4D	4	0.009529	9.08e-05	0.00126	1117	3	-0.45588	0.97665	0.99945	1	16778	0	-0.45588
G3BP1	4	0.0095318	9.08e-05	0.00126	1118	3	-0.45944	0.51624	0.863	1	8842	1	-0.45944
QRSL1	4	0.009542	9.08e-05	0.00126	1119	2	-0.4222	0.66069	0.90436	1	11028	0	-0.4222
CPSF2	4	0.0095515	9.08e-05	0.00126	1120	3	-0.6448	0.98092	0.99962	1	16892	0	-0.6448	0.0095515
UBA52	3	0.0095922	0.00010777	0.001483	1121	2	-1.067	0.88884	0.98635	1	14976	0	-1.067	0.0095922
CEP55	4	0.0095964	9.08e-05	0.00126	1122	3	-0.54453	0.99125	0.99984	1	17223	0	-0.54453
RPP14	4	0.0096556	9.08e-05	0.00126	1123	3	-0.44256	0.99129	0.99988	1	17224	0	-0.44256
AHCTF1	4	0.0096726	9.08e-05	0.00126	1124	3	-0.64329	0.78758	0.96388	1	13147	0	-0.64329
ZFP91	4	0.0096766	9.08e-05	0.00126	1125	2	-0.47619	0.92964	0.99544	1	15737	0	-0.47619
ENPP5	4	0.0097265	9.08e-05	0.00126	1126	3	-0.45036	0.8124	0.97049	1	13586	0	-0.45036
TMEM92	4	0.0097667	9.08e-05	0.00126	1127	3	-0.58519	0.69837	0.92247	1	11639	0	-0.58519
BIRC2	4	0.0097691	9.08e-05	0.00126	1128	3	-0.79448	0.99742	0.99999	1	17523	0	-0.79448
OR4K1	4	0.0098122	9.08e-05	0.00126	1129	2	-0.51961	0.76616	0.95625	1	12757	0	-0.51961
MED4	4	0.009877	9.08e-05	0.00126	1130	2	-0.62502	0.18625	0.63644	1	5095	1	-0.62502
CIT	4	0.009892	9.08e-05	0.00126	1131	3	-0.49767	0.99516	0.99993	1	17399	0	-0.49767
SF3B5	4	0.0098978	9.08e-05	0.00126	1132	3	-0.80387	0.32843	0.7426	1	6778	1	-0.80387	0.0098978
POLR1E	4	0.0099225	9.08e-05	0.00126	1133	2	-0.38074	0.39466	0.76888	1	7443	1	-0.38074
FAM13B	4	0.0099265	9.08e-05	0.00126	1134	3	-0.49755	0.98693	0.99981	1	17069	0	-0.49755
USP39	4	0.0099421	9.08e-05	0.00126	1135	2	-0.53938	0.95534	0.99742	1	16247	0	-0.53938	0.0099421
DPP10	4	0.0099616	9.08e-05	0.00126	1136	2	-0.57973	0.42859	0.79501	1	7791	1	-0.57973
EQTN	4	0.0099899	9.08e-05	0.00126	1137	3	-0.63823	0.76802	0.95625	1	12786	0	-0.63823
MED23	4	0.009991	9.08e-05	0.00126	1138	1	0.012564	0.67811	0.9091	1	11291	0	0.012564
UNC50	4	0.0099943	9.08e-05	0.00126	1139	2	-0.71209	0.24294	0.69569	1	5964	1	-0.71209
OR4S1	4	0.010019	9.08e-05	0.00126	1140	3	-0.4359	0.99559	0.99995	1	17417	0	-0.4359
DXO	4	0.010027	9.08e-05	0.00126	1141	3	-0.59159	0.87643	0.98593	1	14753	0	-0.59159
RPL9	1	0.010036	2.74e-07	1.3e-05	1142	1	-1.7878	0.98996	1	1	17166	0	-1.7878
PHF21A	4	0.010051	9.08e-05	0.00126	1143	3	-0.47846	0.998	1	1	17576	0	-0.47846
GSE1	4	0.010066	9.08e-05	0.00126	1144	3	-0.81283	0.99684	0.99998	1	17487	0	-0.81283
BCL2L12	4	0.010103	9.08e-05	0.00126	1145	3	-0.64966	0.94849	0.99742	1	16108	0	-0.64966
RPS16	4	0.010178	9.08e-05	0.00126	1146	2	-0.61507	0.53754	0.863	1	9139	1	-0.61507	0.010178
RSF1	4	0.010217	9.08e-05	0.00126	1147	3	-0.63777	0.99751	0.99999	1	17532	0	-0.63777
SRP68	4	0.010226	9.08e-05	0.00126	1148	3	-0.77931	0.54432	0.863	1	9228	1	-0.77931
DPM2	4	0.01024	9.08e-05	0.00126	1149	3	-0.46209	0.96276	0.99828	1	16434	0	-0.46209
TMEM199	4	0.01035	9.08e-05	0.00126	1150	2	-0.63022	0.48942	0.84735	1	8518	1	-0.63022
DGCR2	4	0.010426	9.08e-05	0.00126	1151	3	-0.47098	0.9908	0.99984	1	17205	0	-0.47098
S100A14	4	0.010486	9.08e-05	0.00126	1152	3	-0.50445	0.81599	0.97049	1	13651	0	-0.50445
PFDN2	4	0.010563	9.08e-05	0.00126	1153	2	-0.65261	0.57468	0.87864	1	9679	1	-0.65261	0.010563
SAR1A	4	0.010578	9.08e-05	0.00126	1154	3	-0.53638	0.86237	0.98223	1	14503	0	-0.53638
SGOL1	4	0.010584	9.08e-05	0.00126	1155	3	-0.62884	0.49907	0.85253	1	8640	1	-0.62884
TMEM126A	4	0.010614	9.08e-05	0.00126	1156	3	-0.53836	0.99684	0.99998	1	17486	0	-0.53836
LEMD2	4	0.010629	9.13e-05	0.00126	1157	3	-0.59725	0.95793	0.99828	1	16302	0	-0.59725
BRD2	4	0.010632	9.13e-05	0.00126	1158	3	-0.58102	0.99775	1	1	17552	0	-0.58102
SPG7	4	0.010641	9.13e-05	0.00126	1159	3	-0.53491	0.99309	0.99988	1	17293	0	-0.53491
FGFR1OP	4	0.010664	9.13e-05	0.00126	1160	1	-0.10839	0.95164	0.99742	1	16155	0	-0.10839
CYP27C1	4	0.010665	9.13e-05	0.00126	1161	3	-0.50978	0.75369	0.9535	1	12540	0	-0.50978
DRD3	4	0.010689	9.13e-05	0.00126	1162	3	-0.55341	0.99103	0.99984	1	17215	0	-0.55341
PPIH	4	0.010692	9.13e-05	0.00126	1163	3	-0.66414	0.54673	0.863	1	9265	1	-0.66414
KANSL2	4	0.010695	9.13e-05	0.00126	1164	3	-0.57087	0.96261	0.99828	1	16427	0	-0.57087
PPRC1	4	0.010704	9.13e-05	0.00126	1165	3	-0.53411	0.99409	0.99988	1	17338	0	-0.53411
SFPQ	4	0.01072	9.13e-05	0.00126	1166	1	0.24344	0.35401	0.74783	1	7031	1	0.24344
MVD	4	0.010816	9.13e-05	0.00126	1167	3	-0.65952	0.046867	0.34619	1	2058	1	-0.65952
PNMA3	4	0.010908	9.13e-05	0.00126	1168	3	-0.63274	0.98499	0.99975	1	17009	0	-0.63274
TMEM167A	1	0.010911	2.74e-07	1.3e-05	1169	1	-1.5699	0.98909	1	1	17144	0	-1.5699
UBE4A	4	0.01092	9.13e-05	0.00126	1170	3	-0.70385	0.9979	1	1	17561	0	-0.70385
NFATC4	4	0.010935	9.13e-05	0.00126	1171	3	-0.62135	0.066283	0.3745	1	2481	1	-0.62135
FBXO42	4	0.010957	9.13e-05	0.00126	1172	3	-0.49817	0.99651	0.99998	1	17470	0	-0.49817
CCNC	4	0.010984	9.13e-05	0.00126	1173	3	-0.65593	0.99737	0.99999	1	17521	0	-0.65593
NDUFA13	4	0.011089	9.13e-05	0.00126	1174	3	-0.59699	0.94743	0.99742	1	16091	0	-0.59699	0.011089
ZNF200	4	0.011176	9.13e-05	0.00126	1175	3	-0.50247	0.37939	0.75843	1	7264	1	-0.50247
BHLHA15	4	0.011244	9.13e-05	0.00126	1176	3	-0.65143	0.9772	0.99962	1	16793	0	-0.65143
MCL1	4	0.011264	9.13e-05	0.00126	1177	2	-0.73612	0.9678	0.9989	1	16549	0	-0.73612
SNX15	4	0.011272	9.13e-05	0.00126	1178	3	-0.58881	0.99862	1	1	17621	0	-0.58881
SLC4A1AP	4	0.011306	9.13e-05	0.00126	1179	3	-0.52395	0.99619	0.99998	1	17457	0	-0.52395
RIF1	4	0.011316	9.13e-05	0.00126	1180	3	-0.52994	0.99492	0.9999	1	17386	0	-0.52994
CRAMP1L	4	0.011368	9.13e-05	0.00126	1181	2	-0.42563	0.91795	0.99374	1	15505	0	-0.42563
PSMD14	4	0.011378	9.13e-05	0.00126	1182	3	-0.67489	0.87639	0.98593	1	14751	0	-0.67489	0.011378
IFT122	4	0.011419	9.13e-05	0.00126	1183	3	-0.63615	0.53082	0.863	1	9055	1	-0.63615
TDG	4	0.011422	9.13e-05	0.00126	1184	3	-0.48672	0.8059	0.96618	1	13488	0	-0.48672
GOSR2	4	0.011431	9.13e-05	0.00126	1185	3	-0.89422	0.99681	0.99998	1	17484	0	-0.89422
MCM10	4	0.011486	9.13e-05	0.00126	1186	3	-0.69956	0.75654	0.9535	1	12587	0	-0.69956
RALGAPA1	4	0.011528	9.13e-05	0.00126	1187	2	-0.59373	0.037842	0.34066	1	1856	1	-0.59373
C9orf72	4	0.011539	9.13e-05	0.00126	1188	3	-0.57798	0.79655	0.96388	1	13333	0	-0.57798
CCDC37	4	0.011555	9.13e-05	0.00126	1189	3	-0.5143	0.98691	0.99981	1	17067	0	-0.5143
TSC1	4	0.011558	9.13e-05	0.00126	1190	3	-0.5178	0.99515	0.99993	1	17398	0	-0.5178
SH2D1B	4	0.011571	9.13e-05	0.00126	1191	3	-0.48511	0.85038	0.97933	1	14292	0	-0.48511
STAG3	4	0.011591	9.13e-05	0.00126	1192	2	-0.35994	0.20306	0.6539	1	5457	1	-0.35994
WDR5	4	0.011616	9.13e-05	0.00126	1193	2	-0.26167	0.66067	0.90436	1	11027	0	-0.26167
OR5D13	4	0.011618	9.13e-05	0.00126	1194	3	-0.4335	0.86252	0.98223	1	14507	0	-0.4335
UBAP1	4	0.011704	9.13e-05	0.00126	1195	3	-0.67918	0.99	0.99984	1	17167	0	-0.67918
BSCL2	4	0.011704	9.13e-05	0.00126	1196	3	-0.47844	0.99545	0.99995	1	17413	0	-0.47844
2003-09-01	4	0.011728	9.13e-05	0.00126	1197	1	0.14808	0.15791	0.59916	1	4469	1	0.14808
COL2A1	4	0.011784	9.13e-05	0.00126	1198	3	-0.41044	0.80709	0.96838	1	13513	0	-0.41044
CHCHD4	4	0.011791	9.13e-05	0.00126	1199	3	-0.51528	0.99487	0.9999	1	17384	0	-0.51528
PICK1	4	0.01181	9.13e-05	0.00126	1200	3	-0.58248	0.84633	0.97933	1	14218	0	-0.58248
TXN	1	0.011815	2.74e-07	1.3e-05	1201	1	-1.5593	0.98818	1	1	17109	0	-1.5593	0.011815
NAPA	3	0.011839	0.00010777	0.001483	1202	2	-0.69838	0.20999	0.57375	1	5595	1	-0.69838	0.011839
ATP6V1F	4	0.011845	9.13e-05	0.00126	1203	2	-0.51328	0.96514	0.99828	1	16479	0	-0.51328
CBX1	4	0.011845	9.13e-05	0.00126	1204	3	-0.53742	0.77725	0.95625	1	12955	0	-0.53742
DNAJC7	4	0.011865	9.13e-05	0.00126	1205	3	-0.53687	0.94683	0.99673	1	16074	0	-0.53687
TIMM17A	4	0.011866	9.13e-05	0.00126	1206	2	-0.5923	0.99245	0.99988	1	17264	0	-0.5923
CTC1	4	0.011887	9.13e-05	0.00126	1207	3	-0.56538	0.9819	0.99962	1	16917	0	-0.56538
NDUFB4	4	0.011944	9.13e-05	0.00126	1208	2	-0.68	0.58333	0.87864	1	9805	1	-0.68
PLA2R1	4	0.011994	9.13e-05	0.00126	1209	3	-0.56443	0.99585	0.99995	1	17432	0	-0.56443
SDHB	4	0.012043	9.13e-05	0.00126	1210	3	-0.48964	0.97246	0.99906	1	16672	0	-0.48964
SIAH1	4	0.012049	9.13e-05	0.00126	1211	3	-0.46349	0.95063	0.99742	1	16138	0	-0.46349
ARHGEF17	4	0.0121	9.13e-05	0.00126	1212	2	-0.45583	0.89618	0.99	1	15106	0	-0.45583
CCL1	4	0.012105	9.13e-05	0.00126	1213	3	-0.48755	0.59208	0.88381	1	9936	1	-0.48755
CYP17A1	4	0.012114	9.13e-05	0.00126	1214	3	-0.48319	0.89133	0.99	1	15015	0	-0.48319
FDXR	4	0.012121	9.13e-05	0.00126	1215	3	-0.43344	0.94307	0.99673	1	16004	0	-0.43344
CIAPIN1	4	0.012131	9.13e-05	0.00126	1216	3	-0.52128	0.39143	0.76888	1	7399	1	-0.52128
SRCAP	4	0.01215	9.13e-05	0.00126	1217	3	-0.46474	0.99026	0.99984	1	17180	0	-0.46474
ZNF648	4	0.012226	9.13e-05	0.00126	1218	3	-0.65008	0.96614	0.99828	1	16506	0	-0.65008
KLHL12	4	0.012262	9.13e-05	0.00126	1219	3	-0.56635	0.29017	0.72701	1	6397	1	-0.56635
WBSCR22	4	0.012272	9.13e-05	0.00126	1220	2	-0.18941	0.0045968	0.072663	1	395	2	-0.18941	0.012272
CXXC1	4	0.012295	9.13e-05	0.00126	1221	3	-0.59523	0.998	1	1	17575	0	-0.59523
GALNT6	4	0.012308	9.13e-05	0.00126	1222	3	-0.57613	0.99298	0.99988	1	17286	0	-0.57613
PLAC9	4	0.012311	9.13e-05	0.00126	1223	3	-0.59459	0.95859	0.99828	1	16320	0	-0.59459
RTTN	4	0.012318	9.13e-05	0.00126	1224	3	-0.59001	0.54114	0.863	1	9191	1	-0.59001
WSB1	4	0.012351	9.13e-05	0.00126	1225	3	-0.41492	0.98607	0.99981	1	17046	0	-0.41492
KRT24	4	0.012391	9.13e-05	0.00126	1226	3	-0.49908	0.9471	0.99673	1	16085	0	-0.49908
PEX12	4	0.012397	9.13e-05	0.00126	1227	3	-0.51201	0.90366	0.9917	1	15243	0	-0.51201
EPC1	4	0.012437	9.13e-05	0.00126	1228	3	-0.51736	0.98844	0.99984	1	17120	0	-0.51736
RNMT	4	0.012447	9.13e-05	0.00126	1229	3	-0.73889	0.99853	1	1	17615	0	-0.73889
C5orf64	4	0.012504	9.13e-05	0.00126	1230	3	-0.41051	0.61764	0.89429	1	10308	1	-0.41051
OSBP	4	0.012511	9.13e-05	0.00126	1231	2	-0.44694	0.91168	0.9917	1	15380	0	-0.44694
NOL12	4	0.012537	9.13e-05	0.00126	1232	3	-0.48612	0.99847	1	1	17609	0	-0.48612
PEBP1	4	0.012587	9.13e-05	0.00126	1233	3	-0.63085	0.92165	0.99431	1	15580	0	-0.63085
MSH5	4	0.01262	9.13e-05	0.00126	1234	3	-0.54222	0.98585	0.99981	1	17036	0	-0.54222
KCNJ11	4	0.012624	9.13e-05	0.00126	1235	1	0.12231	0.18197	0.63644	1	5003	2	0.12231
RAB1B	4	0.012634	9.13e-05	0.00126	1236	2	-0.53424	0.98435	0.99969	1	16988	0	-0.53424
COX7C	4	0.012654	9.13e-05	0.00126	1237	3	-0.51094	0.99463	0.99988	1	17366	0	-0.51094
EHMT2	4	0.012693	9.13e-05	0.00126	1238	2	-0.32379	0.85068	0.97933	1	14299	0	-0.32379
URB2	4	0.012751	9.13e-05	0.00126	1239	2	-0.38918	0.63505	0.89429	1	10604	0	-0.38918
ATP5B	4	0.012759	9.13e-05	0.00126	1240	2	-0.48742	0.57319	0.87864	1	9654	1	-0.48742	0.012759
ALG1	4	0.012782	9.13e-05	0.00126	1241	3	-0.67509	0.97201	0.99906	1	16650	0	-0.67509	0.012782
SLC35A1	4	0.012812	9.13e-05	0.00126	1242	3	-0.53532	0.8267	0.9742	1	13836	0	-0.53532
NOL6	4	0.012816	9.13e-05	0.00126	1243	3	-0.77866	0.57661	0.87864	1	9710	1	-0.77866	0.012816
PAF1	4	0.012861	9.13e-05	0.00126	1244	2	-0.37409	0.87962	0.98905	1	14814	0	-0.37409
ADAM9	4	0.01287	9.13e-05	0.00126	1245	3	-0.39528	0.97718	0.99962	1	16792	0	-0.39528
SLC25A3	4	0.01288	9.13e-05	0.00126	1246	3	-0.55079	0.26798	0.71148	1	6187	1	-0.55079
TYRO3	4	0.012883	9.13e-05	0.00126	1247	2	-0.66735	0.97853	0.99962	1	16817	0	-0.66735
UBAP2L	4	0.012935	9.13e-05	0.00126	1248	2	-0.5177	0.93309	0.99544	1	15805	0	-0.5177
BMS1	4	0.012945	9.13e-05	0.00126	1249	3	-0.49259	0.99872	1	1	17631	0	-0.49259
TSR2	4	0.012964	9.13e-05	0.00126	1250	2	-0.53134	0.97605	0.9992	1	16768	0	-0.53134
PARL	4	0.012992	9.13e-05	0.00126	1251	3	-0.38649	0.99667	0.99998	1	17477	0	-0.38649
SOWAHC	4	0.013023	9.13e-05	0.00126	1252	2	-0.48704	0.73486	0.94761	1	12225	0	-0.48704
OVCH1	4	0.013054	9.13e-05	0.00126	1253	3	-0.47448	0.92976	0.99544	1	15741	0	-0.47448
OPA1	4	0.013068	9.13e-05	0.00126	1254	2	-0.44741	0.9798	0.99962	1	16857	0	-0.44741
SPICE1	4	0.01309	9.13e-05	0.00126	1255	3	-0.55737	0.71329	0.94125	1	11881	0	-0.55737
ANAPC16	4	0.013116	9.13e-05	0.00126	1256	3	-0.50471	0.90647	0.9917	1	15292	0	-0.50471
POGZ	4	0.013174	9.13e-05	0.00126	1257	3	-0.57484	0.96945	0.9989	1	16587	0	-0.57484
SLC3A2	4	0.01324	9.13e-05	0.00126	1258	3	-0.47871	0.87294	0.98477	1	14683	0	-0.47871
KAT6B	4	0.013253	9.13e-05	0.00126	1259	3	-0.43213	0.90224	0.9917	1	15215	0	-0.43213
RRS1	4	0.01326	9.13e-05	0.00126	1260	3	-0.69258	0.90598	0.9917	1	15278	0	-0.69258	0.01326
NFE2L1	4	0.013278	9.13e-05	0.00126	1261	3	-0.45121	0.99761	0.99999	1	17539	0	-0.45121
GFER	4	0.013283	9.13e-05	0.00126	1262	2	-0.46854	0.51473	0.863	1	8818	1	-0.46854
C5orf46	3	0.013325	0.00024214	0.00314	1263	2	-0.82735	0.088745	0.41474	1	2980	1	-0.82735
ZC3H18	4	0.013354	9.13e-05	0.00126	1264	3	-0.49345	0.95866	0.99828	1	16323	0	-0.49345
RPGRIP1	4	0.013392	9.13e-05	0.00126	1265	3	-0.48872	0.68961	0.92247	1	11489	0	-0.48872
SLAMF9	4	0.013441	9.13e-05	0.00126	1266	3	-0.45818	0.92842	0.99544	1	15706	0	-0.45818
CAMK4	4	0.013497	9.13e-05	0.00126	1267	3	-0.42687	0.94736	0.9971	1	16089	0	-0.42687
MAP3K1	4	0.013507	9.13e-05	0.00126	1268	3	-0.51196	0.93393	0.99544	1	15822	0	-0.51196
NCKAP1L	4	0.013574	9.13e-05	0.00126	1269	3	-0.57469	0.99387	0.99988	1	17330	0	-0.57469
SYNPO2L	4	0.013676	9.13e-05	0.00126	1270	3	-0.44867	0.86704	0.98223	1	14586	0	-0.44867
C5orf63	4	0.013679	9.13e-05	0.00126	1271	3	-0.4779	0.94549	0.99673	1	16050	0	-0.4779
PROC	4	0.013727	9.13e-05	0.00126	1272	2	-0.60653	0.99051	0.99984	1	17192	0	-0.60653
TM9SF1	4	0.013796	9.13e-05	0.00126	1273	3	-0.49935	0.86621	0.98223	1	14566	0	-0.49935
ABCC6	4	0.013803	9.13e-05	0.00126	1274	2	-0.61762	0.85251	0.97933	1	14336	0	-0.61762
MVB12A	4	0.013853	9.13e-05	0.00126	1275	3	-0.44649	0.89839	0.9917	1	15146	0	-0.44649
OR1D5	4	0.013938	9.13e-05	0.00126	1276	3	-0.42246	0.75564	0.9535	1	12571	0	-0.42246
MFAP1	4	0.013947	9.13e-05	0.00126	1277	3	-0.75847	0.96034	0.99828	1	16373	0	-0.75847
ACTR1A	4	0.013966	9.13e-05	0.00126	1278	1	-0.0056852	0.76433	0.95625	1	12722	0	-0.0056852
CARTPT	4	0.013978	9.13e-05	0.00126	1279	2	-0.56665	0.92802	0.99544	1	15699	0	-0.56665
ALG11	4	0.014077	9.13e-05	0.00126	1280	2	-0.51771	0.97373	0.9992	1	16712	0	-0.51771
GTF2I	4	0.014164	9.13e-05	0.00126	1281	3	-0.48034	0.99082	0.99984	1	17207	0	-0.48034
ZNF791	4	0.014182	9.13e-05	0.00126	1282	3	-0.55147	0.90985	0.9917	1	15348	0	-0.55147
NOP2	4	0.014204	9.13e-05	0.00126	1283	3	-0.70801	0.94389	0.99673	1	16015	0	-0.70801	0.014204
CHCHD5	4	0.014208	9.13e-05	0.00126	1284	2	-0.52124	0.77704	0.95625	1	12952	0	-0.52124
TAGLN2	4	0.014233	9.13e-05	0.00126	1285	3	-0.57048	0.99798	1	1	17574	0	-0.57048
C9orf114	4	0.014246	9.13e-05	0.00126	1286	2	-0.65063	0.98931	0.99984	1	17150	0	-0.65063	0.014246
AAMP	4	0.014269	9.13e-05	0.00126	1287	3	-0.45237	0.99661	0.99998	1	17474	0	-0.45237
RARS2	4	0.014293	9.13e-05	0.00126	1288	3	-0.6135	0.49546	0.85253	1	8592	1	-0.6135	0.014293
DYRK1A	4	0.014305	9.13e-05	0.00126	1289	3	-0.44118	0.98573	0.99981	1	17033	0	-0.44118
GPATCH8	4	0.014347	9.13e-05	0.00126	1290	2	-0.66569	0.11365	0.53131	1	3521	1	-0.66569
IL17RA	4	0.014396	9.13e-05	0.00126	1291	3	-0.59774	0.99699	0.99998	1	17497	0	-0.59774
KLC1	4	0.014414	9.13e-05	0.00126	1292	1	-0.092819	0.17496	0.62793	1	4851	1	-0.092819
ANO6	4	0.014421	9.13e-05	0.00126	1293	3	-0.47724	0.6814	0.9137	1	11347	0	-0.47724
NOC4L	4	0.01444	9.13e-05	0.00126	1294	2	-0.53463	0.97466	0.9992	1	16729	0	-0.53463	0.01444
AFMID	4	0.014451	9.13e-05	0.00126	1295	3	-0.41042	0.96528	0.99828	1	16487	0	-0.41042
SIPA1	4	0.014495	9.13e-05	0.00126	1296	3	-0.44381	0.99386	0.99988	1	17329	0	-0.44381
TIGIT	4	0.014498	9.13e-05	0.00126	1297	3	-0.51572	0.84645	0.97933	1	14220	0	-0.51572
ANKRD49	4	0.014502	9.13e-05	0.00126	1298	3	-0.4259	0.99785	1	1	17559	0	-0.4259
TXLNA	4	0.014509	9.13e-05	0.00126	1299	2	-0.5455	0.96773	0.99872	1	16545	0	-0.5455
RFPL2	4	0.014513	9.13e-05	0.00126	1300	3	-0.58241	0.88261	0.98905	1	14871	0	-0.58241
C10orf105	4	0.014553	9.13e-05	0.00126	1301	3	-0.43885	0.99808	1	1	17582	0	-0.43885
RNF40	4	0.014564	9.13e-05	0.00126	1302	3	-0.5747	0.98339	0.99969	1	16951	0	-0.5747
VCPIP1	4	0.014587	9.13e-05	0.00126	1303	2	-0.61564	0.98823	0.99981	1	17113	0	-0.61564
FBXW11	4	0.014618	9.13e-05	0.00126	1304	2	-0.36608	0.19963	0.64511	1	5383	1	-0.36608
CCNB1	4	0.0147	0.00017578	0.00229	1305	3	-0.44394	0.95733	0.99828	1	16285	0	-0.44394
PDE1B	4	0.014722	0.00017578	0.00229	1306	3	-0.43068	0.99701	0.99998	1	17498	0	-0.43068
RIN1	4	0.014789	0.00017578	0.00229	1307	3	-0.54663	0.7022	0.92659	1	11708	0	-0.54663
MAP3K8	4	0.014793	0.00017578	0.00229	1308	3	-0.49302	0.47622	0.84216	1	8351	1	-0.49302
DNA2	4	0.014805	0.00017578	0.00229	1309	2	-0.45925	0.7162	0.94125	1	11926	0	-0.45925
RXFP4	4	0.014837	0.00017578	0.00229	1310	3	-0.39557	0.97597	0.9992	1	16765	0	-0.39557
DUSP3	4	0.014841	0.00017578	0.00229	1311	3	-0.57849	0.99678	0.99998	1	17483	0	-0.57849
NAE1	4	0.014848	0.00017578	0.00229	1312	3	-0.58011	0.99316	0.99988	1	17294	0	-0.58011
DDX51	4	0.014859	0.00017578	0.00229	1313	3	-0.59741	0.6956	0.92247	1	11595	0	-0.59741
USPL1	4	0.014861	0.00017578	0.00229	1314	2	-0.50772	0.96253	0.99828	1	16422	0	-0.50772	0.014861
PSTK	4	0.014908	0.00017578	0.00229	1315	3	-0.6932	0.40357	0.77405	1	7540	1	-0.6932
MACROD1	4	0.01493	0.00017578	0.00229	1316	3	-0.53503	0.97322	0.99906	1	16698	0	-0.53503
TINF2	4	0.015027	0.00017578	0.00229	1317	2	-0.53736	0.952	0.99742	1	16163	0	-0.53736
CELA1	4	0.015042	0.00017578	0.00229	1318	2	-0.44728	0.41438	0.77406	1	7643	1	-0.44728
C19orf52	4	0.015068	0.00017578	0.00229	1319	3	-0.54978	0.49411	0.85253	1	8574	1	-0.54978
SDAD1	4	0.015129	0.00017578	0.00229	1320	2	-0.54613	0.63728	0.89429	1	10632	0	-0.54613	0.015129
OCIAD1	4	0.015151	0.00017578	0.00229	1321	3	-0.48813	0.95758	0.99828	1	16294	0	-0.48813
AOC3	4	0.015192	0.00017578	0.00229	1322	3	-0.68184	0.72189	0.94447	1	12029	0	-0.68184
ANKFN1	4	0.015193	0.00017578	0.00229	1323	2	-0.53885	0.95778	0.99828	1	16298	0	-0.53885
NT5C3B	4	0.015196	0.00017578	0.00229	1324	3	-0.40311	0.9502	0.99742	1	16127	0	-0.40311
XAB2	3	0.015198	0.00024214	0.00314	1325	1	0.11016	0.8037	0.96628	1	13450	0	0.11016	0.015198
SRP14	4	0.015215	0.00017578	0.00229	1326	3	-0.45359	0.85085	0.97933	1	14301	0	-0.45359
PRPF18	4	0.01523	0.00017578	0.00229	1327	3	-0.39089	0.58074	0.87864	1	9774	1	-0.39089
ALG5	4	0.015241	0.00017578	0.00229	1328	2	-0.33792	0.94289	0.99673	1	15999	0	-0.33792
FMO5	4	0.015257	0.00017578	0.00229	1329	3	-0.52296	0.97135	0.99906	1	16634	0	-0.52296
ANGPTL6	4	0.015313	0.00017578	0.00229	1330	3	-0.43967	0.0082515	0.11288	1	565	1	-0.43967
VPS54	4	0.01532	0.00017578	0.00229	1331	2	-0.54574	0.89198	0.99	1	15028	0	-0.54574
MGAT2	4	0.015378	0.00017578	0.00229	1332	3	-0.49214	0.84494	0.97933	1	14191	0	-0.49214
TWISTNB	4	0.015384	0.00017578	0.00229	1333	2	-0.46314	0.48925	0.84735	1	8517	1	-0.46314
MED13L	4	0.015408	0.00017578	0.00229	1334	3	-0.71654	0.99733	0.99999	1	17519	0	-0.71654
NACA2	4	0.015427	0.00017578	0.00229	1335	3	-0.39522	0.99294	0.99988	1	17282	0	-0.39522
FMNL1	4	0.01545	0.00017578	0.00229	1336	3	-0.49661	0.78183	0.95889	1	13048	0	-0.49661
RPL34	1	0.01546	2.74e-07	1.3e-05	1337	1	-1.6663	0.98454	1	1	16996	0	-1.6663
SP2	4	0.015522	0.00017578	0.00229	1338	3	-0.51817	0.97973	0.99962	1	16856	0	-0.51817
NDNL2	4	0.015564	0.00017578	0.00229	1339	3	-0.46691	0.99001	0.99984	1	17169	0	-0.46691
CDKN2AIPNL	4	0.015599	0.00017578	0.00229	1340	3	-0.5024	0.65475	0.90436	1	10926	0	-0.5024
TTF1	4	0.0156	0.00017578	0.00229	1341	2	-0.47512	0.3436	0.74783	1	6931	1	-0.47512
WNT3	4	0.015603	0.00017578	0.00229	1342	3	-0.56059	0.56347	0.87339	1	9500	1	-0.56059
BARD1	4	0.015614	0.00017578	0.00229	1343	3	-0.49919	0.96948	0.9989	1	16588	0	-0.49919
GPATCH1	4	0.015618	0.00017578	0.00229	1344	3	-0.60666	0.72497	0.94447	1	12074	0	-0.60666
ANP32E	4	0.01563	0.00017578	0.00229	1345	3	-0.53188	0.98731	0.99981	1	17082	0	-0.53188
DNAJA3	4	0.015632	0.00017578	0.00229	1346	2	-0.53234	0.78443	0.95889	1	13092	0	-0.53234	0.015632
RRP1	4	0.015656	0.00017578	0.00229	1347	3	-0.50783	0.93894	0.99591	1	15923	0	-0.50783	0.015656
EMX1	4	0.015689	0.00017578	0.00229	1348	3	-0.59603	0.96522	0.99828	1	16483	0	-0.59603
TMX2	4	0.015695	0.00017578	0.00229	1349	3	-0.54814	0.15118	0.59097	1	4315	1	-0.54814
ZNF85	2	0.01572	0.00081306	0.007739	1350	2	-0.64336	0.98428	0.99919	1	16986	0	-0.64336
ACER3	4	0.015737	0.00017578	0.00229	1351	2	-0.40338	0.43997	0.80018	1	7921	1	-0.40338
POLR1C	4	0.015756	0.00017578	0.00229	1352	3	-0.56622	0.99805	1	1	17579	0	-0.56622	0.015756
COQ2	4	0.015795	0.00017632	0.00229	1353	3	-0.47508	0.99753	0.99999	1	17534	0	-0.47508
SLC25A1	4	0.01581	0.00017632	0.00229	1354	3	-0.77329	0.99207	0.99988	1	17250	0	-0.77329
DGCR14	4	0.015853	0.00017632	0.00229	1355	3	-0.54881	0.89181	0.99	1	15023	0	-0.54881
TTC27	4	0.015911	0.00017632	0.00229	1356	3	-0.5732	0.94484	0.99673	1	16040	0	-0.5732	0.015911
AZGP1	4	0.015923	0.00017632	0.00229	1357	2	-0.41811	0.64832	0.8994	1	10820	0	-0.41811
ACTR1B	4	0.015939	0.00017632	0.00229	1358	3	-0.65229	0.93515	0.99544	1	15850	0	-0.65229
SUPT3H	4	0.01595	0.00017632	0.00229	1359	3	-0.51848	0.91193	0.9917	1	15388	0	-0.51848
TIMM8A	4	0.016098	0.00017632	0.00229	1360	3	-0.42408	0.97186	0.99906	1	16645	0	-0.42408
MAPK8IP1	4	0.016114	0.00017632	0.00229	1361	3	-0.43934	0.99787	1	1	17560	0	-0.43934
MS4A3	4	0.016135	0.00017632	0.00229	1362	2	-0.51714	0.99392	0.99988	1	17333	0	-0.51714
CHMP7	4	0.016216	0.00017632	0.00229	1363	2	-0.36849	0.64842	0.8994	1	10822	0	-0.36849
MRPL53	4	0.016219	0.00017632	0.00229	1364	3	-0.42975	0.85235	0.97933	1	14331	0	-0.42975	0.016219
RDH10	4	0.016227	0.00017632	0.00229	1365	3	-0.52189	0.88266	0.98905	1	14872	0	-0.52189
CDT1	4	0.016233	0.00017632	0.00229	1366	2	-0.61228	0.7855	0.96388	1	13110	0	-0.61228	0.016233
AP2B1	4	0.016385	0.00017632	0.00229	1367	3	-0.45602	0.92134	0.99374	1	15575	0	-0.45602
BACH2	4	0.016397	0.00017632	0.00229	1368	2	-0.44054	0.71721	0.94447	1	11941	0	-0.44054
CHCHD3	4	0.016416	0.00017632	0.00229	1369	3	-0.57725	0.99331	0.99988	1	17303	0	-0.57725
ATP5F1	4	0.016444	0.00017632	0.00229	1370	3	-0.42901	0.20478	0.65919	1	5490	1	-0.42901
FAM45A	4	0.01648	0.00017632	0.00229	1371	1	0.14824	0.6276	0.89429	1	10471	1	0.14824
SMAP1	4	0.016484	0.00017632	0.00229	1372	3	-0.37172	0.98855	0.99984	1	17124	0	-0.37172
TREML4	4	0.01657	0.00017632	0.00229	1373	2	-0.47271	0.98001	0.99962	1	16863	0	-0.47271
APOLD1	4	0.016591	0.00017632	0.00229	1374	1	-0.17785	0.68186	0.91818	1	11352	0	-0.17785
NFYC	4	0.016603	0.00017632	0.00229	1375	2	-0.53614	0.97931	0.99962	1	16838	0	-0.53614
SAC3D1	4	0.016635	0.00017632	0.00229	1376	3	-0.48408	0.8569	0.98085	1	14409	0	-0.48408
NDUFS1	4	0.016679	0.00017632	0.00229	1377	3	-0.42994	0.51519	0.863	1	8824	1	-0.42994
GPR161	4	0.016707	0.00017632	0.00229	1378	3	-0.40282	0.97504	0.9992	1	16743	0	-0.40282
SPRYD3	4	0.016783	0.00017632	0.00229	1379	3	-0.4601	0.82672	0.9742	1	13837	0	-0.4601
KIF2C	4	0.01681	0.00017632	0.00229	1380	2	-0.51874	0.95405	0.99742	1	16220	0	-0.51874
TIMM22	4	0.016815	0.00017632	0.00229	1381	3	-0.4469	0.96375	0.99828	1	16455	0	-0.4469
FAM168A	4	0.016831	0.00017632	0.00229	1382	3	-0.40882	0.028477	0.27841	1	1473	1	-0.40882
NDUFB6	4	0.016855	0.00017632	0.00229	1383	3	-0.28632	0.98302	0.99969	1	16941	0	-0.28632
TAF2	4	0.016863	0.00017632	0.00229	1384	3	-0.44258	0.96028	0.99828	1	16372	0	-0.44258
RRP9	4	0.016877	0.00017632	0.00229	1385	2	-0.46326	0.98445	0.99969	1	16994	0	-0.46326
TLE3	4	0.01692	0.00029424	0.003618	1386	3	-0.43979	0.92518	0.99491	1	15644	0	-0.43979
AZIN1	4	0.016936	0.00029424	0.003618	1387	3	-0.57923	0.98405	0.99969	1	16975	0	-0.57923
MYO7B	4	0.016996	0.00029424	0.003618	1388	3	-0.52712	0.93596	0.99544	1	15865	0	-0.52712
IL25	4	0.017009	0.00029424	0.003618	1389	3	-0.40538	0.97474	0.9992	1	16732	0	-0.40538
C2orf49	4	0.017069	0.00029424	0.003618	1390	3	-0.46067	0.54726	0.863	1	9271	1	-0.46067
EIF6	4	0.017077	0.00029424	0.003618	1391	3	-0.65882	0.36934	0.74783	1	7180	1	-0.65882	0.017077
COX11	4	0.017102	0.00029424	0.003618	1392	3	-0.43334	0.99574	0.99995	1	17429	0	-0.43334	0.017102
SRD5A3	4	0.01715	0.00029424	0.003618	1393	3	-0.49059	0.98683	0.99981	1	17065	0	-0.49059
TPR	4	0.017187	0.00029424	0.003618	1394	2	-0.75292	0.95478	0.99742	1	16237	0	-0.75292
TNFAIP3	4	0.017199	0.00029424	0.003618	1395	3	-0.48572	0.94172	0.99634	1	15975	0	-0.48572
TRIM46	4	0.017203	0.00029424	0.003618	1396	3	-0.42838	0.98912	0.99984	1	17146	0	-0.42838
MPEG1	4	0.017207	0.00029424	0.003618	1397	3	-0.41177	0.95227	0.99742	1	16171	0	-0.41177
C20orf62	4	0.017261	0.00029424	0.003618	1398	1	0.46105	0.028158	0.27841	1	1461	2	0.46105
AP3M1	4	0.017289	0.00029424	0.003618	1399	3	-0.40852	0.79432	0.96388	1	13286	0	-0.40852
DNMT1	4	0.017317	0.00029424	0.003618	1400	1	-0.2053	0.98533	0.99981	1	17022	0	-0.2053	0.017317
TCF3	4	0.017346	0.00029424	0.003618	1401	3	-0.41787	0.96854	0.9989	1	16568	0	-0.41787
TANC2	4	0.017363	0.00029424	0.003618	1402	2	-0.56587	0.8355	0.9742	1	13989	0	-0.56587
TP53I13	4	0.017367	0.00029424	0.003618	1403	3	-0.47267	0.99806	1	1	17581	0	-0.47267
ZNF473	4	0.0174	0.00029424	0.003618	1404	3	-0.38538	0.13199	0.57172	1	3909	1	-0.38538
MON2	4	0.017456	0.00029424	0.003618	1405	2	-0.58806	0.87096	0.98223	1	14653	0	-0.58806
CHN1	4	0.017474	0.00029424	0.003618	1406	3	-0.36896	0.9932	0.99988	1	17297	0	-0.36896
TPST2	4	0.017519	0.00029424	0.003618	1407	3	-0.51432	0.86247	0.98223	1	14506	0	-0.51432
KCNH3	4	0.017606	0.00029424	0.003618	1408	3	-0.54494	0.96634	0.99828	1	16509	0	-0.54494
ITPK1	4	0.01761	0.00029424	0.003618	1409	3	-0.606	0.99076	0.99984	1	17204	0	-0.606
SLC31A1	4	0.017672	0.00029424	0.003618	1410	3	-0.411	0.99589	0.99995	1	17434	0	-0.411
ATXN7	4	0.017713	0.00029424	0.003618	1411	3	-0.48953	0.84304	0.97602	1	14147	0	-0.48953
C6orf25	4	0.017726	0.00029424	0.003618	1412	3	-0.5142	0.28869	0.72701	1	6383	1	-0.5142
TMEM223	4	0.017754	0.00029424	0.003618	1413	2	-0.48655	0.95081	0.99742	1	16143	0	-0.48655
FAM76A	4	0.017776	0.00029424	0.003618	1414	3	-0.43759	0.94831	0.99742	1	16105	0	-0.43759
ZC3H11A	4	0.017784	0.00029424	0.003618	1415	3	-0.71896	0.99842	1	1	17604	0	-0.71896
NOC3L	4	0.017796	0.00029424	0.003618	1416	3	-0.54469	0.99884	1	1	17644	0	-0.54469
TMEM255B	4	0.017813	0.00029424	0.003618	1417	3	-0.55746	0.92856	0.99544	1	15713	0	-0.55746
RPN2	4	0.017851	0.00029424	0.003618	1418	3	-0.3779	0.9792	0.99962	1	16834	0	-0.3779
NDE1	4	0.017863	0.00029424	0.003618	1419	3	-0.67029	0.99306	0.99988	1	17291	0	-0.67029
TBP	4	0.017874	0.00029424	0.003618	1420	2	-0.2328	0.72293	0.94447	1	12046	0	-0.2328
TMEM258	4	0.017986	0.00029424	0.003618	1421	1	-0.38228	0.9762	0.99933	1	16774	0	-0.38228	0.017986
CABP2	4	0.018039	0.00029424	0.003618	1422	3	-0.46471	0.98506	0.99975	1	17011	0	-0.46471
FKBP8	4	0.018045	0.00029424	0.003618	1423	2	-0.47547	0.99222	0.99988	1	17256	0	-0.47547
API5	4	0.01806	0.00029424	0.003618	1424	3	-0.61116	0.33078	0.7426	1	6794	1	-0.61116
STIL	4	0.018062	0.00029424	0.003618	1425	2	-0.50378	0.7185	0.94447	1	11964	0	-0.50378
SHOC2	4	0.018071	0.00029424	0.003618	1426	2	-0.37107	0.97919	0.99962	1	16833	0	-0.37107
SLC20A1	4	0.018127	0.00029424	0.003618	1427	3	-0.49604	0.80857	0.96838	1	13531	0	-0.49604
MEMO1	4	0.018131	0.00029424	0.003618	1428	3	-0.46714	0.66064	0.90436	1	11026	0	-0.46714
C20orf196	4	0.018165	0.00029424	0.003618	1429	2	-0.36376	0.98873	0.99984	1	17130	0	-0.36376
OR5AP2	4	0.018233	0.00029424	0.003618	1430	3	-0.428	0.52182	0.863	1	8926	1	-0.428
DIS3	4	0.018264	0.00029424	0.003618	1431	1	-0.28495	0.76508	0.95625	1	12739	0	-0.28495	0.018264
PTTG1	4	0.018347	0.00029479	0.003618	1432	2	-0.53693	0.84078	0.9742	1	14101	0	-0.53693
F2RL1	4	0.018376	0.00029479	0.003618	1433	1	0.43169	0.012694	0.18268	1	801	3	0.43169
KLHL17	4	0.018453	0.00029479	0.003618	1434	3	-0.42856	0.99498	0.99993	1	17393	0	-0.42856
SMG1	4	0.018479	0.00029479	0.003618	1435	3	-0.63515	0.89406	0.99	1	15069	0	-0.63515
SP7	4	0.018573	0.00029479	0.003618	1436	3	-0.52159	0.99687	0.99998	1	17489	0	-0.52159
RBM5	4	0.018628	0.00029479	0.003618	1437	3	-0.49298	0.99573	0.99995	1	17428	0	-0.49298
PDAP1	4	0.018658	0.00029479	0.003618	1438	3	-0.63777	0.92876	0.99544	1	15718	0	-0.63777
CCT8	4	0.018703	0.00029479	0.003618	1439	2	-0.58944	0.98851	0.99984	1	17123	0	-0.58944	0.018703
C12orf45	4	0.018766	0.00029479	0.003618	1440	3	-0.44914	0.93424	0.99544	1	15829	0	-0.44914
WT1	4	0.018835	0.00029479	0.003618	1441	3	-0.59935	0.99427	0.99988	1	17351	0	-0.59935
A1CF	4	0.018899	0.00029479	0.003618	1442	3	-0.46428	0.97567	0.9992	1	16758	0	-0.46428
ZNF75D	4	0.018933	0.00029479	0.003618	1443	2	-0.55943	0.62959	0.89429	1	10508	1	-0.55943
EML6	4	0.018943	0.00029479	0.003618	1444	3	-0.49045	0.62838	0.89429	1	10486	1	-0.49045
U2AF2	4	0.019003	0.00029479	0.003618	1445	3	-0.6148	0.57631	0.87864	1	9706	1	-0.6148	0.019003
NONO	4	0.019034	0.00029479	0.003618	1446	3	-0.63666	0.9976	0.99999	1	17538	0	-0.63666
BRD9	4	0.019054	0.00029479	0.003618	1447	2	-0.44781	0.20034	0.64511	1	5394	1	-0.44781
RFPL1	2	0.019151	0.00081306	0.007739	1448	2	-0.62848	0.98085	0.99919	1	16890	0	-0.62848
SLC41A3	4	0.01916	0.00029479	0.003618	1449	3	-0.42523	0.99599	0.99997	1	17440	0	-0.42523
TPM2	4	0.019168	0.00029479	0.003618	1450	3	-0.48294	0.95253	0.99742	1	16177	0	-0.48294
BZRAP1	4	0.019225	0.00029479	0.003618	1451	3	-0.49384	0.92236	0.99431	1	15593	0	-0.49384
SLC9A4	4	0.019266	0.00029479	0.003618	1452	2	-0.54193	0.99227	0.99988	1	17259	0	-0.54193
GATAD2A	4	0.019337	0.00029479	0.003618	1453	2	-0.56051	0.99136	0.99988	1	17227	0	-0.56051
NELFE	4	0.019348	0.00029479	0.003618	1454	3	-0.55288	0.95396	0.99742	1	16215	0	-0.55288
CABP4	4	0.019354	0.00029479	0.003618	1455	2	-0.24954	0.86958	0.98223	1	14633	0	-0.24954
RPS19BP1	4	0.01937	0.00029479	0.003618	1456	3	-0.46904	0.97883	0.99962	1	16825	0	-0.46904
ZNF259	4	0.019378	0.00029479	0.003618	1457	2	-0.56888	0.92079	0.99374	1	15563	0	-0.56888	0.019378
UBA2	4	0.019444	0.00029479	0.003618	1458	3	-0.66887	0.98775	0.99981	1	17099	0	-0.66887
INCENP	4	0.019479	0.00029479	0.003618	1459	2	-0.55124	0.92072	0.99374	1	15560	0	-0.55124
TAF8	4	0.019506	0.00029479	0.003618	1460	2	-0.65393	0.96701	0.99851	1	16525	0	-0.65393
C12orf10	4	0.019555	0.00029479	0.003618	1461	3	-0.51799	0.5562	0.86822	1	9395	1	-0.51799
DDX52	4	0.019586	0.00029479	0.003618	1462	3	-0.37616	0.99811	1	1	17586	0	-0.37616
ASPM	4	0.019616	0.00029479	0.003618	1463	3	-0.56005	0.99869	1	1	17627	0	-0.56005
ARL5C	4	0.01967	0.00045822	0.005259	1464	3	-0.44587	0.84039	0.9742	1	14090	0	-0.44587
PICALM	4	0.019684	0.00045822	0.005259	1465	2	-0.55633	0.91984	0.99374	1	15542	0	-0.55633
PSMD1	4	0.019723	0.00045822	0.005259	1466	3	-0.72835	0.99441	0.99988	1	17359	0	-0.72835	0.019723
FHL2	4	0.019729	0.00045822	0.005259	1467	2	-0.4689	0.75077	0.9535	1	12489	0	-0.4689
ARHGDIA	4	0.019749	0.00045822	0.005259	1468	3	-0.30924	0.44747	0.82117	1	8012	1	-0.30924
CAPZB	4	0.019773	0.00045822	0.005259	1469	2	-0.34235	0.46302	0.83169	1	8203	1	-0.34235
THOC6	4	0.019836	0.00045822	0.005259	1470	2	-0.46056	0.97179	0.99906	1	16643	0	-0.46056
ZDHHC18	4	0.019896	0.00045822	0.005259	1471	3	-0.405	0.089147	0.43915	1	2992	1	-0.405
SERINC2	4	0.019928	0.00045822	0.005259	1472	3	-0.44552	0.40276	0.77405	1	7531	1	-0.44552
ATXN7L3	4	0.019955	0.00045822	0.005259	1473	3	-0.3902	0.80197	0.96618	1	13424	0	-0.3902
BBS1	4	0.020007	0.00045822	0.005259	1474	2	-0.58556	0.93884	0.99591	1	15921	0	-0.58556
GFPT1	4	0.020046	0.00045822	0.005259	1475	2	-0.43698	0.84734	0.97933	1	14234	0	-0.43698
URB1	4	0.020067	0.00045822	0.005259	1476	3	-0.37686	0.96766	0.99872	1	16540	0	-0.37686
OR4K14	4	0.020093	0.00045822	0.005259	1477	3	-0.39662	0.97267	0.99906	1	16683	0	-0.39662
PCF11	4	0.020142	0.00045822	0.005259	1478	2	-0.33136	0.33661	0.74783	1	6844	1	-0.33136
SPACA3	4	0.020174	0.00045822	0.005259	1479	3	-0.5318	0.97617	0.99933	1	16771	0	-0.5318
SEPHS2	4	0.020197	0.00045822	0.005259	1480	3	-0.44143	0.83559	0.9742	1	13991	0	-0.44143
RPL28	4	0.020251	0.00045822	0.005259	1481	2	-0.64833	0.87122	0.98355	1	14657	0	-0.64833
POLD4	4	0.020251	0.00045822	0.005259	1482	3	-0.54137	0.96596	0.99828	1	16501	0	-0.54137
TMEM66	4	0.020296	0.00045822	0.005259	1483	3	-0.42238	0.016089	0.20673	1	958	1	-0.42238
MMS22L	4	0.020323	0.00045822	0.005259	1484	2	-0.50558	0.99641	0.99998	1	17466	0	-0.50558	0.020323
MAL	4	0.02036	0.00045822	0.005259	1485	2	-0.22829	0.19889	0.6451	1	5358	2	-0.22829
CAPRIN1	4	0.020396	0.00045822	0.005259	1486	2	-0.4935	0.98014	0.99962	1	16869	0	-0.4935
PPAP2A	4	0.020414	0.00045822	0.005259	1487	2	-0.14271	0.69959	0.92247	1	11661	0	-0.14271
SEMA4A	4	0.020418	0.00045822	0.005259	1488	3	-0.50425	0.99876	1	1	17634	0	-0.50425
GTF2B	4	0.020436	0.00045822	0.005259	1489	1	-0.11085	0.84572	0.97933	1	14207	0	-0.11085	0.020436
PLCB2	4	0.020446	0.00045822	0.005259	1490	3	-0.39504	0.93606	0.99544	1	15866	0	-0.39504
PTOV1	4	0.020487	0.00045822	0.005259	1491	2	-0.44228	0.95683	0.99802	1	16273	0	-0.44228
CDK5	4	0.020546	0.00045822	0.005259	1492	3	-0.47601	0.86461	0.98223	1	14546	0	-0.47601
DDX56	4	0.020578	0.00045822	0.005259	1493	3	-0.41603	0.90139	0.9917	1	15199	0	-0.41603	0.020578
MS4A10	4	0.020587	0.00045822	0.005259	1494	3	-0.45882	0.99295	0.99988	1	17284	0	-0.45882
PRKCE	4	0.020602	0.00045822	0.005259	1495	2	-0.27928	0.14613	0.58451	1	4185	1	-0.27928
DPPA2	4	0.020651	0.00045822	0.005259	1496	3	-0.44624	0.9988	1	1	17641	0	-0.44624
PBLD	4	0.020706	0.00045822	0.005259	1497	2	-0.47597	0.74937	0.9535	1	12464	0	-0.47597
POU3F3	4	0.02077	0.00045822	0.005259	1498	2	-0.43501	0.97012	0.9989	1	16605	0	-0.43501
HLF	4	0.02082	0.00045822	0.005259	1499	3	-0.37588	0.9891	0.99984	1	17145	0	-0.37588
EXOSC1	4	0.020825	0.00045822	0.005259	1500	3	-0.41163	0.79775	0.96388	1	13351	0	-0.41163
ARL8A	4	0.020857	0.00045822	0.005259	1501	3	-0.37752	0.98662	0.99981	1	17059	0	-0.37752
GPR98	4	0.020875	0.00045822	0.005259	1502	3	-0.41586	0.99479	0.9999	1	17381	0	-0.41586
AMOTL1	4	0.02088	0.00045822	0.005259	1503	3	-0.41092	0.96807	0.9989	1	16556	0	-0.41092
CDK2AP2	4	0.020935	0.00045822	0.005259	1504	3	-0.42673	0.96537	0.99828	1	16490	0	-0.42673
RBBP6	4	0.020981	0.00045822	0.005259	1505	3	-0.42936	0.9971	0.99998	1	17504	0	-0.42936	0.020981
ARPC2	4	0.02099	0.00045822	0.005259	1506	2	-0.58592	0.95353	0.99742	1	16204	0	-0.58592
PNO1	4	0.021046	0.00045822	0.005259	1507	3	-0.42473	0.89422	0.99	1	15072	0	-0.42473
UBE2A	4	0.021073	0.00045822	0.005259	1508	2	0.006115	0.91715	0.99309	1	15491	0	0.006115
GTF3C3	4	0.021097	0.00045822	0.005259	1509	3	-0.48233	0.99429	0.99988	1	17352	0	-0.48233
RPE	4	0.021176	0.00045822	0.005259	1510	3	-0.46111	0.99746	0.99999	1	17525	0	-0.46111
MB21D1	4	0.021193	0.00045822	0.005259	1511	2	-0.49318	0.84463	0.97771	1	14180	0	-0.49318
SENP6	4	0.021217	0.00045822	0.005259	1512	3	-0.38506	0.92815	0.99544	1	15702	0	-0.38506
MYOC	4	0.021255	0.00045822	0.005259	1513	3	-0.44547	0.8684	0.98223	1	14611	0	-0.44547
FAM122A	4	0.021267	0.00045822	0.005259	1514	2	-0.62069	0.94056	0.99634	1	15947	0	-0.62069
NKIRAS2	4	0.021273	0.00045822	0.005259	1515	3	-0.59525	0.92342	0.99431	1	15611	0	-0.59525
PPP4C	4	0.021286	0.00045822	0.005259	1516	2	-0.36315	0.98936	0.99984	1	17154	0	-0.36315	0.021286
BRCA2	4	0.021362	0.00045822	0.005259	1517	3	-0.42352	0.98578	0.99981	1	17034	0	-0.42352
CCDC17	4	0.021381	0.00045822	0.005259	1518	1	0.17429	0.11816	0.54788	1	3617	2	0.17429
FBXO40	4	0.021394	0.00045822	0.005259	1519	3	-0.40653	0.99703	0.99998	1	17499	0	-0.40653
PKMYT1	4	0.021437	0.00045822	0.005259	1520	2	-0.42935	0.98657	0.99981	1	17056	0	-0.42935	0.021437
METTL16	4	0.021453	0.00045822	0.005259	1521	2	-0.59077	0.99422	0.99988	1	17346	0	-0.59077	0.021453
NRM	4	0.021471	0.00045822	0.005259	1522	2	-0.51643	0.937	0.99591	1	15876	0	-0.51643
SPATA5L1	4	0.021488	0.00045822	0.005259	1523	3	-0.42762	0.84215	0.9742	1	14127	0	-0.42762	0.021488
SMARCB1	4	0.021502	0.00045822	0.005259	1524	3	-0.50411	0.88873	0.99	1	14973	0	-0.50411
TMEM26	4	0.021577	0.00045822	0.005259	1525	3	-0.46236	0.93644	0.99544	1	15868	0	-0.46236
OTOP1	4	0.021603	0.00045822	0.005259	1526	2	-0.089963	0.03627	0.33021	1	1811	2	-0.089963
HAUS2	4	0.021659	0.00045822	0.005259	1527	2	-0.13402	0.10219	0.50035	1	3260	1	-0.13402
SECISBP2	4	0.021779	0.00045822	0.005259	1528	2	-0.08837	0.039891	0.34066	1	1905	2	-0.08837
CHMP2A	4	0.021826	0.00045822	0.005259	1529	2	-0.53992	0.99354	0.99988	1	17312	0	-0.53992	0.021826
FAU	4	0.021845	0.00045822	0.005259	1530	2	-0.58952	0.93673	0.99544	1	15874	0	-0.58952	0.021845
F12	4	0.021882	0.00045822	0.005259	1531	2	-0.13088	0.17005	0.62793	1	4737	2	-0.13088
ATP6AP1	4	0.021929	0.00045822	0.005259	1532	2	-0.27097	0.91298	0.9917	1	15412	0	-0.27097
BCL2L13	4	0.021937	0.00045822	0.005259	1533	2	-0.21419	0.78407	0.95889	1	13086	0	-0.21419
TSPAN33	4	0.022155	0.00045822	0.005259	1534	2	-0.28459	0.54488	0.863	1	9238	1	-0.28459
RPL30	2	0.022192	0.00081361	0.007739	1535	2	-0.82111	0.97781	0.99919	1	16807	0	-0.82111	0.022192
HIST2H2BF	2	0.022196	0.00081361	0.007739	1536	2	-0.483	0.9778	0.99919	1	16805	0	-0.483
HHIPL2	4	0.02225	0.00045822	0.005259	1537	2	-0.42765	0.83135	0.9742	1	13925	0	-0.42765
RLIM	4	0.022325	0.00045822	0.005259	1538	2	-0.51896	0.96287	0.99828	1	16435	0	-0.51896
RPL5	2	0.022346	0.00081361	0.007739	1539	1	-0.90533	0.82599	0.96656	1	13825	0	-0.90533
BECN1	4	0.022429	0.00045822	0.005259	1540	2	-0.38918	0.527	0.863	1	8994	1	-0.38918
PHAX	4	0.022437	0.00045822	0.005259	1541	2	-0.45215	0.96787	0.9989	1	16550	0	-0.45215
WTAP	4	0.022603	0.00045877	0.005259	1542	1	0.021475	0.77183	0.95625	1	12855	0	0.021475
C6orf15	4	0.022753	0.00045877	0.005259	1543	2	-0.47922	0.97875	0.99962	1	16823	0	-0.47922
SND1	4	0.02277	0.00045877	0.005259	1544	1	-0.042181	0.052305	0.35193	1	2158	2	-0.042181
COA6	4	0.022887	0.00045877	0.005259	1545	2	-0.45486	0.80049	0.96388	1	13403	0	-0.45486
TRAPPC3	4	0.022954	0.00045877	0.005259	1546	2	-0.52135	0.51012	0.863	1	8769	1	-0.52135	0.022954
SPRY4	4	0.02304	0.00045877	0.005259	1547	2	-0.2902	0.21453	0.66436	1	5693	1	-0.2902
SPIC	4	0.023103	0.00045877	0.005259	1548	1	-0.053778	0.79269	0.96388	1	13254	0	-0.053778
CD8B	4	0.023136	0.00045877	0.005259	1549	2	-0.41375	0.9887	0.99984	1	17129	0	-0.41375
CRCP	4	0.023271	0.00045877	0.005259	1550	2	-0.32146	0.75325	0.9535	1	12534	0	-0.32146
PRKAR1A	4	0.023436	0.00045877	0.005259	1551	2	-0.2112	0.2987	0.73743	1	6487	1	-0.2112
ITGA1	4	0.023522	0.00045877	0.005259	1552	2	-0.46957	0.97129	0.99906	1	16630	0	-0.46957
YBX1	4	0.023532	0.00045877	0.005259	1553	2	-0.46127	0.94961	0.99742	1	16121	0	-0.46127
LIN52	4	0.023547	0.00045877	0.005259	1554	1	-0.16666	0.18242	0.63644	1	5014	1	-0.16666
C14orf119	4	0.023561	0.00045877	0.005259	1555	2	-0.60376	0.99293	0.99988	1	17280	0	-0.60376
TRIP4	4	0.0236	0.00045877	0.005259	1556	2	-0.39966	0.04463	0.34066	1	2009	1	-0.39966
ACCSL	4	0.023649	0.00045877	0.005259	1557	2	-0.56313	0.77925	0.95625	1	12987	0	-0.56313
NFAM1	4	0.023765	0.00045877	0.005259	1558	2	-0.37673	0.61084	0.88382	1	10214	1	-0.37673
LSG1	4	0.023769	0.00045877	0.005259	1559	2	-0.54121	0.91845	0.99374	1	15513	0	-0.54121	0.023769
MAFG	4	0.023833	0.00045877	0.005259	1560	2	-0.49223	0.95263	0.99742	1	16182	0	-0.49223
ACY3	4	0.023863	0.00045877	0.005259	1561	2	-0.5069	0.99467	0.99988	1	17371	0	-0.5069
MIS12	4	0.023936	0.00045877	0.005259	1562	2	-0.32993	0.72016	0.94447	1	11997	0	-0.32993
PFDN6	4	0.023991	0.00045877	0.005259	1563	2	-0.52163	0.69251	0.92247	1	11543	0	-0.52163
MNT	4	0.024029	0.00045877	0.005259	1564	2	-0.421	0.11839	0.54788	1	3624	1	-0.421
PHC1	4	0.024264	0.00045877	0.005259	1565	2	-0.44502	0.68923	0.92247	1	11483	0	-0.44502
RPL15	1	0.024387	2.74e-07	1.3e-05	1566	1	-1.0803	0.97561	1	1	16757	0	-1.0803
SFSWAP	4	0.024639	0.00045877	0.005259	1567	2	-0.29125	0.98466	0.99975	1	17000	0	-0.29125
DLEC1	4	0.024823	0.00045877	0.005259	1568	1	0.025935	0.89547	0.99	1	15092	0	0.025935
OTX2	4	0.024989	0.00045877	0.005259	1569	1	0.063507	0.18365	0.63644	1	5043	2	0.063507
MRPS30	4	0.025211	0.00045877	0.005259	1570	1	-0.00064816	0.76199	0.9535	1	12689	0	-0.00064816
LGALS3BP	4	0.025246	0.00045877	0.005259	1571	2	-0.40237	0.88938	0.99	1	14982	0	-0.40237
ARL2BP	2	0.025262	0.00081361	0.007739	1572	2	-0.4282	0.97474	0.99919	1	16733	0	-0.4282
TAF5	4	0.025426	0.0007127	0.006806	1573	2	-0.50866	0.90541	0.9917	1	15267	0	-0.50866
LAMTOR2	4	0.025456	0.0007127	0.006806	1574	2	-0.29753	0.37177	0.74783	1	7202	1	-0.29753
RFT1	4	0.025466	0.0007127	0.006806	1575	2	-0.52065	0.98279	0.99969	1	16939	0	-0.52065
POLR1D	4	0.025544	0.0007127	0.006806	1576	2	-0.4932	0.99629	0.99998	1	17460	0	-0.4932
KLK2	4	0.025599	0.0007127	0.006806	1577	1	-0.0052601	0.52703	0.863	1	8995	1	-0.0052601
BRCA1	4	0.025688	0.0007127	0.006806	1578	2	-0.57119	0.96904	0.9989	1	16581	0	-0.57119
PSMG3	4	0.025698	0.0007127	0.006806	1579	2	-0.58013	0.78752	0.96388	1	13145	0	-0.58013	0.025698
SLC25A43	4	0.02571	0.0007127	0.006806	1580	2	-0.35536	0.98414	0.99969	1	16978	0	-0.35536
LRRC55	3	0.025842	0.00024268	0.003143	1581	2	-0.44889	0.049481	0.27574	1	2109	1	-0.44889
ZNHIT1	4	0.025849	0.0007127	0.006806	1582	2	-0.49496	0.92221	0.99431	1	15591	0	-0.49496
TRIM16	4	0.025876	0.0007127	0.006806	1583	1	0.12495	0.068946	0.38687	1	2536	2	0.12495
KCTD21	4	0.02594	0.0007127	0.006806	1584	2	-0.54232	0.95815	0.99828	1	16307	0	-0.54232
C16orf92	4	0.025991	0.0007127	0.006806	1585	2	-0.32426	0.83743	0.9742	1	14031	0	-0.32426
AC007431.1	4	0.026306	0.0007127	0.006806	1586	2	-0.53357	0.99286	0.99988	1	17277	0	-0.53357
TAF12	4	0.026319	0.0007127	0.006806	1587	2	-0.15566	0.61877	0.89429	1	10331	1	-0.15566
RBM8A	3	0.026563	0.00024268	0.003143	1588	1	0.06686	0.8028	0.96628	1	13435	0	0.06686	0.026563
BATF2	4	0.026592	0.0007127	0.006806	1589	2	-0.44111	0.90018	0.9917	1	15178	0	-0.44111
LIN9	4	0.026707	0.0007127	0.006806	1590	1	-0.081138	0.75157	0.9535	1	12503	0	-0.081138
SP3	4	0.026787	0.0007127	0.006806	1591	2	-0.63822	0.99572	0.99995	1	17427	0	-0.63822
PZP	4	0.026869	0.0007127	0.006806	1592	2	-0.47203	0.71952	0.94447	1	11978	0	-0.47203
PHYHD1	4	0.026879	0.0007127	0.006806	1593	2	-0.41008	0.57148	0.87339	1	9628	1	-0.41008
MED10	4	0.026928	0.0007127	0.006806	1594	2	-0.24454	0.84469	0.97771	1	14183	0	-0.24454
EIF4E	4	0.026984	0.0007127	0.006806	1595	1	-0.20156	0.69743	0.92247	1	11625	0	-0.20156
NEUROD2	4	0.027106	0.0007127	0.006806	1596	2	-0.50637	0.90639	0.9917	1	15289	0	-0.50637
MARVELD2	4	0.027127	0.0007127	0.006806	1597	2	-0.23502	0.42329	0.79501	1	7735	1	-0.23502
PMF1	4	0.027205	0.0007127	0.006806	1598	2	-0.44359	0.89486	0.99	1	15081	0	-0.44359
RPS29	2	0.027225	0.0012474	0.011859	1599	2	-0.67966	0.97278	0.99875	1	16686	0	-0.67966
TUBG1	4	0.02726	0.0007127	0.006806	1600	2	-0.36083	0.98841	0.99984	1	17119	0	-0.36083	0.02726
CENPA	4	0.027302	0.0007127	0.006806	1601	2	-0.43952	0.94448	0.99673	1	16024	0	-0.43952	0.027302
SERBP1	4	0.027458	0.0007127	0.006806	1602	2	-0.19033	0.060379	0.36257	1	2356	2	-0.19033
RPL32	1	0.027508	2.74e-07	1.3e-05	1603	1	-1.1412	0.97249	1	1	16674	0	-1.1412
RNF25	4	0.027537	0.0007127	0.006806	1604	1	-0.19839	0.66619	0.9091	1	11115	0	-0.19839
SCPEP1	4	0.027648	0.0007127	0.006806	1605	2	-0.30278	0.64884	0.8994	1	10833	0	-0.30278
RNPC3	4	0.027718	0.0007127	0.006806	1606	2	-0.13614	0.066015	0.3745	1	2476	1	-0.13614
XPO5	4	0.027739	0.0007127	0.006806	1607	2	-0.41553	0.30937	0.73743	1	6594	1	-0.41553
ARNT	4	0.02775	0.0007127	0.006806	1608	2	-0.44333	0.98937	0.99984	1	17155	0	-0.44333
LRP2BP	4	0.027906	0.0007127	0.006806	1609	2	-0.11765	0.057579	0.36257	1	2286	2	-0.11765
RALB	4	0.027927	0.0007127	0.006806	1610	2	-0.28145	0.093721	0.48446	1	3082	1	-0.28145
CARS	4	0.02798	0.0007127	0.006806	1611	1	0.15482	0.50813	0.863	1	8744	1	0.15482
MCRS1	4	0.028032	0.0007127	0.006806	1612	2	-0.47139	0.32255	0.73743	1	6723	1	-0.47139
2006-09-01	4	0.028035	0.0007127	0.006806	1613	1	-0.059681	0.55154	0.86822	1	9334	1	-0.059681
CENPC	4	0.028201	0.0007127	0.006806	1614	1	0.25316	0.043101	0.34066	1	1979	2	0.25316	0.028201
BOD1L1	4	0.028256	0.0007127	0.006806	1615	1	-0.076884	0.39108	0.76888	1	7394	1	-0.076884
PCNP	3	0.028289	0.00067595	0.006806	1616	2	-0.48024	0.96937	0.99858	1	16585	0	-0.48024
UTP15	4	0.028367	0.0007127	0.006806	1617	2	-0.62219	0.96848	0.9989	1	16566	0	-0.62219	0.028367
CHRNE	4	0.028533	0.0007127	0.006806	1618	1	0.091635	0.86702	0.98223	1	14585	0	0.091635
FDX1L	4	0.0286	0.0007127	0.006806	1619	2	-0.2709	0.25751	0.71148	1	6080	1	-0.2709
LENG8	4	0.028611	0.0007127	0.006806	1620	2	-0.3666	0.8239	0.97235	1	13787	0	-0.3666
TSEN2	4	0.028812	0.0007127	0.006806	1621	2	-0.40179	0.60992	0.88382	1	10205	1	-0.40179
TXNDC15	4	0.028993	0.0007127	0.006806	1622	2	-0.25641	0.53608	0.863	1	9128	1	-0.25641
ARHGEF40	4	0.029142	0.0007127	0.006806	1623	2	-0.34185	0.93668	0.99544	1	15873	0	-0.34185
NDUFAB1	4	0.029302	0.0007127	0.006806	1624	2	-0.58052	0.90097	0.9917	1	15193	0	-0.58052
MIOX	4	0.029409	0.0007127	0.006806	1625	2	-0.19847	0.82581	0.97235	1	13822	0	-0.19847
PI4KA	4	0.029472	0.0007127	0.006806	1626	1	-0.3996	0.9851	0.99975	1	17012	0	-0.3996
ARMCX6	4	0.029474	0.0007127	0.006806	1627	2	-0.25151	0.22802	0.66436	1	5829	1	-0.25151
ALG10B	1	0.029528	2.74e-07	1.3e-05	1628	1	-1.0632	0.97047	1	1	16615	0	-1.0632
USMG5	1	0.029613	2.74e-07	1.3e-05	1629	1	-1.0341	0.97039	1	1	16613	0	-1.0341
ZBTB14	4	0.029638	0.0007127	0.006806	1630	1	-0.076045	0.30817	0.73743	1	6580	1	-0.076045
ALOX15B	4	0.029804	0.0007127	0.006806	1631	1	-0.069186	0.388	0.76888	1	7360	1	-0.069186
SH2B3	4	0.029969	0.0007127	0.006806	1632	2	-0.27438	0.27324	0.7167	1	6238	1	-0.27438
PLEKHO1	4	0.030109	0.0007127	0.006806	1633	2	-0.55746	0.98736	0.99981	1	17086	0	-0.55746
LBX1	4	0.030141	0.0007127	0.006806	1634	2	-0.45916	0.94435	0.99673	1	16020	0	-0.45916
FBLIM1	4	0.030301	0.0007127	0.006806	1635	1	-0.011983	0.84126	0.9742	1	14111	0	-0.011983
BCAN	4	0.030402	0.0007127	0.006806	1636	2	-0.427	0.93214	0.99544	1	15789	0	-0.427
TECRL	4	0.030577	0.0007127	0.006806	1637	1	-0.11893	0.23724	0.69053	1	5912	1	-0.11893
TMEM177	4	0.031013	0.0007127	0.006806	1638	2	-0.58943	0.94736	0.9971	1	16088	0	-0.58943
HTRA2	4	0.031035	0.0007127	0.006806	1639	2	-0.37738	0.98762	0.99981	1	17094	0	-0.37738
ZNF74	4	0.031145	0.0007127	0.006806	1640	2	-0.40665	0.95693	0.99802	1	16275	0	-0.40665
BRMS1L	4	0.031156	0.0007127	0.006806	1641	2	-0.43545	0.89712	0.99089	1	15128	0	-0.43545
PGGT1B	4	0.031254	0.0007127	0.006806	1642	2	-0.36691	0.87454	0.98593	1	14714	0	-0.36691	0.031254
EPT1	3	0.031342	0.0006765	0.006806	1643	2	-0.71643	0.9412	0.9972	1	15965	0	-0.71643
FOXK2	4	0.031343	0.0007127	0.006806	1644	2	-0.52878	0.23544	0.69053	1	5893	1	-0.52878
PAXBP1	4	0.031354	0.0007127	0.006806	1645	2	-0.39649	0.69463	0.92247	1	11576	0	-0.39649
IMP4	4	0.031365	0.0007127	0.006806	1646	2	-0.51935	0.95903	0.99828	1	16338	0	-0.51935	0.031365
DHX29	4	0.031464	0.0007127	0.006806	1647	2	-0.46019	0.98664	0.99981	1	17061	0	-0.46019
CCNI2	4	0.031497	0.0007127	0.006806	1648	2	-0.26893	0.89553	0.99	1	15093	0	-0.26893
SLC50A1	4	0.031519	0.0007127	0.006806	1649	2	-0.49786	0.5401	0.863	1	9182	1	-0.49786
TSG101	4	0.031552	0.0007127	0.006806	1650	2	-0.47618	0.081484	0.40949	1	2813	1	-0.47618
SEC62	4	0.031641	0.0007127	0.006806	1651	2	-0.54523	0.93202	0.99544	1	15786	0	-0.54523
POLR2I	4	0.031735	0.0007127	0.006806	1652	1	-0.29084	0.9472	0.99673	1	16086	0	-0.29084	0.031735
DNAJB2	4	0.031773	0.0007127	0.006806	1653	2	-0.15185	0.67315	0.9091	1	11214	0	-0.15185
CYC1	4	0.031818	0.0007127	0.006806	1654	2	-0.49348	0.97253	0.99906	1	16677	0	-0.49348
P2RX3	4	0.031884	0.0007127	0.006806	1655	2	-0.44073	0.94482	0.99673	1	16038	0	-0.44073
MED13	4	0.031918	0.0007127	0.006806	1656	2	-0.41897	0.29135	0.72701	1	6410	1	-0.41897
MAPK14	4	0.032006	0.0007127	0.006806	1657	2	-0.52797	0.98182	0.99962	1	16915	0	-0.52797
SIGMAR1	4	0.032062	0.0007127	0.006806	1658	2	-0.20014	0.25334	0.71148	1	6053	1	-0.20014
SRSF2	4	0.032129	0.0007127	0.006806	1659	2	-0.48416	0.54523	0.863	1	9246	1	-0.48416	0.032129
LSM10	4	0.032151	0.0007127	0.006806	1660	2	-0.22145	0.6166	0.89429	1	10295	1	-0.22145
VBP1	4	0.032162	0.0007127	0.006806	1661	2	-0.5652	0.98428	0.99969	1	16985	0	-0.5652
TWF1	4	0.032176	0.0007127	0.006806	1662	2	-0.31108	0.8414	0.9742	1	14114	0	-0.31108
FNDC8	4	0.032329	0.0007127	0.006806	1663	2	-0.36168	0.97753	0.99962	1	16798	0	-0.36168
ASB12	3	0.032386	0.0006765	0.006806	1664	2	-0.61478	0.94342	0.9972	1	16006	0	-0.61478
CNTNAP5	4	0.032397	0.0007127	0.006806	1665	1	-0.21193	0.86245	0.98223	1	14505	0	-0.21193
CR1	4	0.032486	0.0007127	0.006806	1666	2	-0.21777	0.98499	0.99975	1	17010	0	-0.21777
ATP6V0D1	4	0.032508	0.0007127	0.006806	1667	2	-0.46387	0.95972	0.99828	1	16356	0	-0.46387
WDR48	4	0.032587	0.0007127	0.006806	1668	2	-0.42423	0.27888	0.7167	1	6292	1	-0.42423
TSEN34	4	0.032632	0.0007127	0.006806	1669	2	-0.56161	0.79314	0.96388	1	13260	0	-0.56161
KDM8	4	0.032733	0.0007127	0.006806	1670	2	-0.33459	0.11613	0.53958	1	3568	1	-0.33459
HFE2	4	0.032744	0.0007127	0.006806	1671	2	-0.4433	0.88705	0.98906	1	14946	0	-0.4433
IFRD2	4	0.032766	0.0007127	0.006806	1672	2	-0.36369	0.88622	0.98906	1	14938	0	-0.36369
ZMIZ1	4	0.032838	0.0007127	0.006806	1673	1	-0.075767	0.69628	0.92247	1	11611	0	-0.075767
MCM7	4	0.032893	0.0007127	0.006806	1674	2	-0.45158	0.9842	0.99969	1	16980	0	-0.45158	0.032893
VRK1	4	0.032935	0.0007127	0.006806	1675	2	-0.4881	0.96642	0.99828	1	16510	0	-0.4881
C8orf76	4	0.033149	0.0007127	0.006806	1676	2	-0.38236	0.99417	0.99988	1	17342	0	-0.38236
LYG1	4	0.033168	0.0007127	0.006806	1677	1	-0.076936	0.199	0.6451	1	5363	1	-0.076936
SULT1C2	4	0.033183	0.0007127	0.006806	1678	2	-0.089446	0.57767	0.87864	1	9726	1	-0.089446
CLK2	4	0.033228	0.0007127	0.006806	1679	2	-0.41635	0.88453	0.98906	1	14903	0	-0.41635
OR5K4	4	0.033364	0.0007127	0.006806	1680	2	-0.42277	0.93912	0.99591	1	15926	0	-0.42277
HIST1H2AG	1	0.033384	2.74e-07	1.3e-05	1681	1	-0.88217	0.96662	1	1	16515	0	-0.88217
ZNF22	4	0.033389	0.0007127	0.006806	1682	1	-0.046843	0.22923	0.66436	1	5839	1	-0.046843
CSTF3	4	0.033432	0.0007127	0.006806	1683	2	-0.45069	0.88083	0.98905	1	14844	0	-0.45069
NAA30	4	0.033488	0.0007127	0.006806	1684	2	-0.49135	0.9964	0.99998	1	17465	0	-0.49135
STX10	4	0.033534	0.0007127	0.006806	1685	2	-0.24809	0.68954	0.92247	1	11486	0	-0.24809
SETD8	4	0.033613	0.0007127	0.006806	1686	2	-0.42228	0.75013	0.9535	1	12478	0	-0.42228
TTC34	4	0.033664	0.0007127	0.006806	1687	2	-0.26023	0.73006	0.94447	1	12159	0	-0.26023
ROR2	4	0.033727	0.0007127	0.006806	1688	2	-0.039798	0.088091	0.43915	1	2963	2	-0.039798
COX8A	4	0.033738	0.0007127	0.006806	1689	2	-0.39193	0.99635	0.99998	1	17462	0	-0.39193
SLC1A5	4	0.034012	0.0007127	0.006806	1690	2	-0.25933	0.77119	0.95625	1	12842	0	-0.25933
PRR15L	4	0.034275	0.0007127	0.006806	1691	2	-0.50886	0.92284	0.99431	1	15601	0	-0.50886
RNASEH2C	4	0.034412	0.0007127	0.006806	1692	2	-0.40615	0.97677	0.99953	1	16784	0	-0.40615
HEXA	4	0.03449	0.0007127	0.006806	1693	1	0.13682	0.014358	0.19427	1	876	1	0.13682
ADIRF	4	0.034504	0.0007127	0.006806	1694	2	-0.5544	0.96959	0.9989	1	16590	0	-0.5544
FAM25E	4	0.034516	0.0007127	0.006806	1695	2	-0.37775	0.96088	0.99828	1	16390	0	-0.37775
PHF12	4	0.034596	0.0007127	0.006806	1696	2	-0.51021	0.99532	0.99995	1	17406	0	-0.51021
WDR18	4	0.034619	0.0007127	0.006806	1697	2	-0.34427	0.65417	0.90436	1	10917	0	-0.34427
SOAT2	4	0.034654	0.0007127	0.006806	1698	2	-0.44494	0.32208	0.73743	1	6715	1	-0.44494
COPS2	4	0.03471	0.0007127	0.006806	1699	2	-0.46466	0.81475	0.97049	1	13634	0	-0.46466
LYL1	4	0.034757	0.0007127	0.006806	1700	2	-0.28404	0.70841	0.93782	1	11806	0	-0.28404
FBXL22	4	0.034792	0.0007127	0.006806	1701	2	0.026802	0.61775	0.89429	1	10311	1	0.026802
EIF5	4	0.034815	0.0007127	0.006806	1702	2	-0.41982	0.66725	0.9091	1	11130	0	-0.41982
ME3	4	0.03493	0.0007127	0.006806	1703	2	-0.28182	0.47938	0.84216	1	8391	1	-0.28182
C3orf17	4	0.034942	0.0007127	0.006806	1704	2	-0.33799	0.89088	0.99	1	15004	0	-0.33799	0.034942
ATOH7	4	0.035046	0.0007127	0.006806	1705	2	-0.21823	0.075693	0.39339	1	2685	1	-0.21823
ZC3H8	4	0.035315	0.0007127	0.006806	1706	2	-0.16392	0.33852	0.74783	1	6864	1	-0.16392
OR4K13	4	0.035347	0.0007127	0.006806	1707	2	-0.46095	0.98748	0.99981	1	17088	0	-0.46095
XKR3	4	0.03544	0.0007127	0.006806	1708	2	-0.44495	0.21571	0.66436	1	5714	1	-0.44495
PCSK1N	4	0.035568	0.0007127	0.006806	1709	2	-0.27039	0.26116	0.71148	1	6121	1	-0.27039
ALDH9A1	4	0.03572	0.0007127	0.006806	1710	2	-0.35994	0.52751	0.863	1	9005	1	-0.35994
TUBA8	4	0.035953	0.0007127	0.006806	1711	2	-0.46098	0.95583	0.99742	1	16256	0	-0.46098
RSL1D1	4	0.036188	0.0007127	0.006806	1712	2	-0.34254	0.95158	0.99742	1	16154	0	-0.34254
MOCS3	4	0.036376	0.0007127	0.006806	1713	2	-0.3637	0.96739	0.99851	1	16532	0	-0.3637
SMCO4	4	0.036587	0.0007127	0.006806	1714	2	-0.23623	0.77894	0.95625	1	12982	0	-0.23623
CECR1	4	0.036823	0.0007127	0.006806	1715	2	-0.44141	0.97324	0.99906	1	16699	0	-0.44141
DTX2	4	0.036859	0.0007127	0.006806	1716	2	-0.43438	0.97611	0.99933	1	16770	0	-0.43438
BCAS2	4	0.036965	0.0007127	0.006806	1717	2	-0.48461	0.96217	0.99828	1	16413	0	-0.48461
OAS2	4	0.037108	0.0007127	0.006806	1718	2	-0.31065	0.98157	0.99962	1	16908	0	-0.31065
SLC27A5	4	0.037131	0.0007127	0.006806	1719	2	-0.1838	0.82465	0.97235	1	13802	0	-0.1838
LMAN2L	4	0.037274	0.0007127	0.006806	1720	2	-0.52523	0.96666	0.99828	1	16517	0	-0.52523
ZNF202	4	0.037348	0.0007127	0.006806	1721	1	0.34987	0.089024	0.43915	1	2989	2	0.34987
CLEC4D	4	0.037428	0.0007127	0.006806	1722	2	-0.57107	0.99	0.99984	1	17168	0	-0.57107
VPS26A	4	0.037452	0.0007127	0.006806	1723	2	-0.42484	0.97742	0.99962	1	16796	0	-0.42484
SEH1L	4	0.037512	0.0007127	0.006806	1724	2	-0.32749	0.34763	0.74783	1	6972	1	-0.32749	0.037512
RPS6KA4	4	0.037583	0.0007127	0.006806	1725	2	-0.27341	0.87985	0.98905	1	14821	0	-0.27341
LPHN1	4	0.037655	0.0007127	0.006806	1726	2	-0.46776	0.66767	0.9091	1	11140	0	-0.46776
GPR137C	4	0.037732	0.0007127	0.006806	1727	1	-0.21059	0.64138	0.89429	1	10710	0	-0.21059
RPIA	4	0.037762	0.0007127	0.006806	1728	2	-0.023712	0.065205	0.3745	1	2459	2	-0.023712
MPRIP	4	0.037787	0.0007127	0.006806	1729	1	-0.065769	0.83668	0.9742	1	14011	0	-0.065769
SIRPA	4	0.037798	0.0007127	0.006806	1730	2	-0.48195	0.94619	0.99673	1	16062	0	-0.48195
MEAF6	4	0.037882	0.0007127	0.006806	1731	2	-0.27571	0.7034	0.92659	1	11725	0	-0.27571
PITPNM2	4	0.038002	0.0007127	0.006806	1732	2	-0.38944	0.72668	0.94447	1	12102	0	-0.38944
GLTP	4	0.038014	0.0007127	0.006806	1733	2	-0.44554	0.9781	0.99962	1	16813	0	-0.44554
DPM3	4	0.03805	0.0007127	0.006806	1734	2	-0.48489	0.99285	0.99988	1	17275	0	-0.48489
TOMM22	4	0.038121	0.0007127	0.006806	1735	2	-0.59795	0.99566	0.99995	1	17423	0	-0.59795	0.038121
BTF3	2	0.038148	0.0024672	0.021679	1736	1	-0.53615	0.83791	0.97149	1	14043	0	-0.53615
TOP3A	4	0.03829	0.0007127	0.006806	1737	2	-0.45717	0.71145	0.94125	1	11850	0	-0.45717
HAUS5	4	0.038391	0.0007127	0.006806	1738	1	-0.24183	0.24179	0.69569	1	5950	1	-0.24183	0.038391
ANKRD55	4	0.038627	0.00071325	0.006806	1739	2	-0.3541	0.90754	0.9917	1	15310	0	-0.3541
HSD17B12	4	0.038687	0.00071325	0.006806	1740	2	-0.49279	0.92786	0.99544	1	15694	0	-0.49279
KCNT2	4	0.03883	0.00071325	0.006806	1741	1	-0.032453	0.51302	0.863	1	8801	1	-0.032453
SQRDL	4	0.03899	0.00071325	0.006806	1742	2	-0.41734	0.98935	0.99984	1	17153	0	-0.41734
RPS4X	1	0.038992	2.74e-07	1.3e-05	1743	1	-0.85599	0.96101	1	1	16392	0	-0.85599	0.038992
PDZD11	4	0.039135	0.00071325	0.006806	1744	2	-0.40705	0.94533	0.99673	1	16048	0	-0.40705
CA5A	4	0.039159	0.00071325	0.006806	1745	2	-0.12384	0.048779	0.35193	1	2095	2	-0.12384
EP300	4	0.039184	0.00071325	0.006806	1746	2	-0.53134	0.99794	1	1	17567	0	-0.53134
SPATA25	4	0.039463	0.00071325	0.006806	1747	2	-0.35856	0.90626	0.9917	1	15285	0	-0.35856
ZNF33A	4	0.03961	0.00071325	0.006806	1748	2	-0.58271	0.88258	0.98905	1	14870	0	-0.58271
IMMT	4	0.039658	0.00071325	0.006806	1749	2	-0.46615	0.96362	0.99828	1	16453	0	-0.46615
CAP1	4	0.039707	0.00071325	0.006806	1750	2	-0.080861	0.044451	0.34066	1	2006	2	-0.080861
ARPC3	4	0.039744	0.00071325	0.006806	1751	2	-0.43934	0.16009	0.59916	1	4515	1	-0.43934
KDM4E	4	0.039805	0.00071325	0.006806	1752	2	-0.28355	0.88956	0.99	1	14984	0	-0.28355
RPS14	4	0.039915	0.00071325	0.006806	1753	2	-0.51374	0.97515	0.9992	1	16747	0	-0.51374
EMC7	4	0.039981	0.00071325	0.006806	1754	1	0.25052	0.25999	0.71148	1	6110	1	0.25052
ZNF20	4	0.040036	0.00071325	0.006806	1755	2	-0.084399	0.5603	0.86822	1	9450	1	-0.084399
HMOX1	4	0.040111	0.00071325	0.006806	1756	2	-0.36111	0.91177	0.9917	1	15382	0	-0.36111
RPF2	4	0.040148	0.00071325	0.006806	1757	2	-0.45593	0.88459	0.98906	1	14905	0	-0.45593	0.040148
ZDHHC12	4	0.040271	0.00071325	0.006806	1758	2	-0.3075	0.47712	0.84216	1	8361	1	-0.3075
CHD4	4	0.040283	0.00071325	0.006806	1759	2	-0.34892	0.84982	0.97933	1	14277	0	-0.34892
TAF3	4	0.040308	0.00071325	0.006806	1760	2	-0.44719	0.0062286	0.092371	1	472	1	-0.44719
SLC19A2	4	0.040332	0.00071325	0.006806	1761	2	-0.24683	0.67585	0.9091	1	11255	0	-0.24683
AKAP9	4	0.040344	0.00071325	0.006806	1762	2	-0.43225	0.79295	0.96388	1	13259	0	-0.43225
LRRC37B	4	0.040365	0.00071325	0.006806	1763	2	-0.59046	0.97396	0.9992	1	16719	0	-0.59046
DNAJC1	4	0.040381	0.00071325	0.006806	1764	2	-0.23012	0.74732	0.95068	1	12433	0	-0.23012
PAQR5	4	0.040455	0.00071325	0.006806	1765	2	-0.2807	0.49854	0.85253	1	8632	1	-0.2807
CLDN5	4	0.040492	0.00071325	0.006806	1766	2	-0.60798	0.9793	0.99962	1	16837	0	-0.60798
MXRA7	4	0.040541	0.00071325	0.006806	1767	2	-0.57244	0.98042	0.99962	1	16879	0	-0.57244
LRRC3B	4	0.040639	0.00071325	0.006806	1768	1	0.11729	0.70413	0.93053	1	11735	0	0.11729
OR51I1	4	0.040838	0.00071325	0.006806	1769	2	-0.46202	0.22779	0.66436	1	5827	1	-0.46202
SYT2	4	0.040967	0.00071325	0.006806	1770	1	-0.1992	0.85564	0.98085	1	14390	0	-0.1992
EZH1	4	0.041048	0.00071325	0.006806	1771	2	-0.32918	0.84341	0.97771	1	14158	0	-0.32918
KIF19	4	0.041271	0.00071325	0.006806	1772	2	-0.5121	0.99495	0.99993	1	17390	0	-0.5121
P2RX4	4	0.04135	0.00071325	0.006806	1773	2	-0.3186	0.51876	0.863	1	8879	1	-0.3186
RPL10A	3	0.041717	0.0023608	0.020815	1774	2	-0.41615	0.98352	0.9994	1	16953	0	-0.41615	0.041717
HUS1	4	0.041944	0.00071325	0.006806	1775	2	-0.45919	0.93433	0.99544	1	15833	0	-0.45919
C14orf93	4	0.041981	0.00071325	0.006806	1776	2	-0.19262	0.81378	0.97049	1	13613	0	-0.19262
SLC26A10	4	0.042032	0.00071325	0.006806	1777	2	-0.46474	0.31505	0.73743	1	6644	1	-0.46474
TLR6	4	0.042044	0.00071325	0.006806	1778	2	-0.54823	0.74756	0.9535	1	12435	0	-0.54823
TRAP1	4	0.042157	0.00071325	0.006806	1779	2	-0.45381	0.97214	0.99906	1	16659	0	-0.45381
ASCC1	4	0.04239	0.00071325	0.006806	1780	2	-0.34859	0.089463	0.43915	1	2999	1	-0.34859
WNT1	4	0.042433	0.00071325	0.006806	1781	2	-0.28685	0.91468	0.99242	1	15438	0	-0.28685
KRTAP4-5	2	0.042465	0.0024672	0.021679	1782	1	-0.67377	0.92352	0.98889	1	15613	0	-0.67377
PVRL4	4	0.042499	0.00071325	0.006806	1783	2	-0.34253	0.94451	0.99673	1	16025	0	-0.34253
LAS1L	4	0.042508	0.00071325	0.006806	1784	2	-0.26166	0.92296	0.99431	1	15603	0	-0.26166	0.042508
FLOT2	4	0.042559	0.00071325	0.006806	1785	2	-0.49966	0.73049	0.94761	1	12165	0	-0.49966
NDST4	4	0.042609	0.00071325	0.006806	1786	2	-0.27901	0.92253	0.99431	1	15596	0	-0.27901
ARF1	4	0.042621	0.00071325	0.006806	1787	2	-0.26131	0.72688	0.94447	1	12109	0	-0.26131
ANTXRL	4	0.042659	0.00071325	0.006806	1788	2	-0.57792	0.98443	0.99969	1	16992	0	-0.57792
PTRH2	4	0.042798	0.00071325	0.006806	1789	2	-0.4338	0.801	0.96618	1	13410	0	-0.4338
GLI2	4	0.042848	0.00071325	0.006806	1790	2	-0.34318	0.85886	0.98085	1	14444	0	-0.34318
TLN1	4	0.042874	0.00071325	0.006806	1791	2	-0.042875	0.17538	0.62793	1	4859	2	-0.042875
ZCCHC14	4	0.042886	0.00071325	0.006806	1792	2	-0.56678	0.99076	0.99984	1	17203	0	-0.56678
HIST2H2AC	1	0.042933	2.74e-07	1.3e-05	1793	1	-1.1828	0.95707	1	1	16277	0	-1.1828
SEZ6	4	0.042962	0.00071325	0.006806	1794	2	-0.25858	0.91801	0.99374	1	15507	0	-0.25858
NWD1	4	0.043012	0.00071325	0.006806	1795	2	-0.34429	0.73802	0.94761	1	12270	0	-0.34429
SAMD14	4	0.043025	0.00071325	0.006806	1796	2	-0.54775	0.86472	0.98223	1	14548	0	-0.54775
SFT2D2	4	0.04305	0.00071325	0.006806	1797	2	-0.22646	0.29948	0.73743	1	6497	1	-0.22646
IL19	4	0.043215	0.00071325	0.006806	1798	2	-0.29091	0.78056	0.95625	1	13018	0	-0.29091
C3AR1	4	0.043228	0.00071325	0.006806	1799	2	-0.41122	0.68097	0.9091	1	11342	0	-0.41122
PRR11	4	0.043367	0.00071325	0.006806	1800	2	-0.42399	0.99589	0.99995	1	17433	0	-0.42399
RAMP2	4	0.043443	0.00071325	0.006806	1801	2	-0.39001	0.83847	0.9742	1	14053	0	-0.39001
MED9	4	0.043507	0.00071325	0.006806	1802	2	-0.29131	0.49887	0.85253	1	8636	1	-0.29131
ACSS3	4	0.043702	0.00071325	0.006806	1803	1	0.24366	0.13801	0.57172	1	4015	2	0.24366
CECR6	4	0.043761	0.00071325	0.006806	1804	2	-0.37039	0.16558	0.61957	1	4634	1	-0.37039
CALCOCO2	4	0.043811	0.00071325	0.006806	1805	2	-0.15896	0.38636	0.76888	1	7340	1	-0.15896
MEIS3	4	0.04385	0.00071325	0.006806	1806	2	-0.264	0.34092	0.74783	1	6898	1	-0.264
ARL6IP6	4	0.043901	0.00071325	0.006806	1807	2	-0.47347	0.99625	0.99998	1	17458	0	-0.47347
COX17	4	0.043975	0.00071325	0.006806	1808	1	-0.12813	0.85962	0.98085	1	14458	0	-0.12813
CLECL1	4	0.044041	0.00071325	0.006806	1809	2	-0.26293	0.15398	0.59916	1	4379	1	-0.26293
TIGD3	4	0.044067	0.00071325	0.006806	1810	2	-0.2096	0.70224	0.92659	1	11710	0	-0.2096
ALG12	4	0.044105	0.00071325	0.006806	1811	2	-0.46857	0.72291	0.94447	1	12045	0	-0.46857
MARS2	4	0.044303	0.00071325	0.006806	1812	2	-0.37807	0.98602	0.99981	1	17044	0	-0.37807	0.044303
ELF2	4	0.044528	0.00071325	0.006806	1813	2	-0.26449	0.93539	0.99544	1	15854	0	-0.26449
DEK	4	0.044746	0.00071325	0.006806	1814	2	-0.25942	0.34274	0.74783	1	6921	1	-0.25942
FARSA	4	0.044903	0.00071325	0.006806	1815	2	-0.48983	0.067088	0.38054	1	2498	1	-0.48983	0.044903
CCT8L2	4	0.044913	0.00071325	0.006806	1816	2	-0.58413	0.99849	1	1	17610	0	-0.58413
SUSD3	4	0.04499	0.00071325	0.006806	1817	2	-0.39881	0.93907	0.99591	1	15925	0	-0.39881
KRT35	4	0.045042	0.00071325	0.006806	1818	2	-0.50771	0.96221	0.99828	1	16416	0	-0.50771
VTN	4	0.045055	0.00071325	0.006806	1819	2	-0.3662	0.82388	0.97235	1	13786	0	-0.3662
C12orf74	4	0.045119	0.00071325	0.006806	1820	2	-0.42268	0.04861	0.34619	1	2093	1	-0.42268
SLC17A5	4	0.045145	0.00071325	0.006806	1821	2	-0.42241	0.64912	0.90436	1	10838	0	-0.42241
NUPL1	4	0.045197	0.00071325	0.006806	1822	2	-0.46935	0.82943	0.9742	1	13888	0	-0.46935
IKZF2	4	0.04521	0.00071325	0.006806	1823	2	-0.37085	0.91599	0.99309	1	15464	0	-0.37085
STH	4	0.045223	0.00071325	0.006806	1824	2	-0.32159	0.93453	0.99544	1	15838	0	-0.32159
SEMA5B	4	0.045365	0.00071325	0.006806	1825	2	-0.41107	0.54457	0.863	1	9231	1	-0.41107
RPL19	4	0.045442	0.00071325	0.006806	1826	2	-0.26595	0.8253	0.97235	1	13815	0	-0.26595	0.045442
ZCCHC13	4	0.045507	0.00071325	0.006806	1827	2	-0.40485	0.98975	0.99984	1	17162	0	-0.40485
FAM181B	4	0.045558	0.00071325	0.006806	1828	2	-0.27255	0.96836	0.9989	1	16562	0	-0.27255
RNF20	4	0.045688	0.00071325	0.006806	1829	2	-0.34952	0.89869	0.9917	1	15155	0	-0.34952	0.045688
DGAT2	4	0.045701	0.00071325	0.006806	1830	2	-0.39279	0.9349	0.99544	1	15846	0	-0.39279
RPS13	4	0.045722	0.00071325	0.006806	1831	2	-0.57534	0.98081	0.99962	1	16888	0	-0.57534	0.045722
FAM186B	4	0.045831	0.00071325	0.006806	1832	1	-0.19439	0.84873	0.97933	1	14259	0	-0.19439
TOMM40	4	0.045857	0.00071325	0.006806	1833	2	-0.42398	0.61547	0.88907	1	10273	1	-0.42398	0.045857
CNNM3	4	0.045961	0.00071325	0.006806	1834	2	-0.35943	0.40789	0.77406	1	7579	1	-0.35943
UPF3B	4	0.045974	0.00071325	0.006806	1835	2	-0.39874	0.74076	0.94761	1	12319	0	-0.39874
NAT10	4	0.045995	0.00071325	0.006806	1836	2	-0.31532	0.90118	0.9917	1	15194	0	-0.31532	0.045995
NR2E1	4	0.046213	0.00071325	0.006806	1837	2	-0.14299	0.76265	0.9535	1	12699	0	-0.14299
ARL1	4	0.046391	0.00071325	0.006806	1838	2	-0.41438	0.46546	0.83169	1	8231	1	-0.41438
SELENBP1	4	0.046404	0.00071325	0.006806	1839	2	-0.49329	0.98227	0.99962	1	16930	0	-0.49329
MPZL1	4	0.046509	0.00071325	0.006806	1840	2	-0.59414	0.99781	1	1	17556	0	-0.59414
LEMD1	4	0.046594	0.00071325	0.006806	1841	1	0.39097	0.11359	0.53131	1	3518	2	0.39097
ACO2	4	0.046703	0.00071325	0.006806	1842	1	0.029408	0.69771	0.92247	1	11631	0	0.029408
EXTL1	4	0.046901	0.00071325	0.006806	1843	2	-0.40005	0.95885	0.99828	1	16332	0	-0.40005
LRMP	4	0.046921	0.00071325	0.006806	1844	1	-0.036745	0.62444	0.89429	1	10416	1	-0.036745
MVK	3	0.047007	0.0023608	0.020815	1845	2	-0.54291	0.98984	0.99989	1	17164	0	-0.54291	0.047007
ZNF592	4	0.047046	0.00071325	0.006806	1846	2	-0.45851	0.99037	0.99984	1	17187	0	-0.45851
TAF10	4	0.047177	0.00071325	0.006806	1847	2	-0.48563	0.23225	0.68533	1	5869	1	-0.48563
LMNB1	4	0.047243	0.00071325	0.006806	1848	2	-0.28244	0.8297	0.9742	1	13897	0	-0.28244
AQP2	4	0.047467	0.00071325	0.006806	1849	2	-0.41241	0.9538	0.99742	1	16211	0	-0.41241
C19orf25	4	0.047533	0.00071325	0.006806	1850	2	-0.36848	0.7344	0.94761	1	12218	0	-0.36848
SLC33A1	4	0.047757	0.00071325	0.006806	1851	2	-0.27764	0.78621	0.96388	1	13123	0	-0.27764
NR1D1	4	0.047836	0.00071325	0.006806	1852	2	-0.30984	0.21961	0.66436	1	5748	1	-0.30984
XRCC5	4	0.047942	0.00071325	0.006806	1853	2	-0.48598	0.88466	0.98906	1	14907	0	-0.48598
PRKAG1	4	0.047955	0.00071325	0.006806	1854	2	-0.47577	0.90725	0.9917	1	15307	0	-0.47577
UXS1	3	0.048035	0.0023608	0.020815	1855	2	-0.37761	0.93727	0.99521	1	15879	0	-0.37761
MYOZ1	4	0.048101	0.00071325	0.006806	1856	2	-0.43317	0.94627	0.99673	1	16067	0	-0.43317
TANGO2	4	0.04812	0.00071325	0.006806	1857	2	-0.39923	0.94606	0.99673	1	16059	0	-0.39923
SLC38A2	4	0.048154	0.00071325	0.006806	1858	2	-0.38529	0.84727	0.97933	1	14233	0	-0.38529
EZH2	4	0.04826	0.00071325	0.006806	1859	2	-0.38811	0.85165	0.97933	1	14317	0	-0.38811
RBM22	4	0.048287	0.00071325	0.006806	1860	2	-0.45689	0.96575	0.99828	1	16497	0	-0.45689
PDIA5	3	0.048308	0.0023608	0.020815	1861	2	-0.44978	0.98106	0.99926	1	16894	0	-0.44978
ZNF449	4	0.048313	0.00071325	0.006806	1862	2	-0.21006	0.44772	0.82117	1	8018	1	-0.21006
PTP4A2	4	0.048327	0.00071325	0.006806	1863	2	-0.56584	0.9921	0.99988	1	17251	0	-0.56584
NPHP1	4	0.048353	0.00071325	0.006806	1864	2	-0.44033	0.68322	0.91818	1	11373	0	-0.44033
PIP4K2C	4	0.048392	0.00071325	0.006806	1865	1	-0.13662	0.8711	0.98223	1	14656	0	-0.13662
FSHR	4	0.048433	0.00071325	0.006806	1866	2	-0.32662	0.89866	0.9917	1	15153	0	-0.32662
UBTF	4	0.048526	0.00071325	0.006806	1867	2	-0.59287	0.86729	0.98223	1	14594	0	-0.59287	0.048526
CHSY3	4	0.048579	0.00071325	0.006806	1868	2	-0.22716	0.7997	0.96388	1	13390	0	-0.22716
FICD	4	0.048619	0.00071325	0.006806	1869	2	-0.50614	0.30457	0.73743	1	6545	1	-0.50614
TADA3	4	0.048766	0.00071325	0.006806	1870	2	-0.29607	0.21787	0.66436	1	5735	1	-0.29607
PDE8B	4	0.048773	0.00071325	0.006806	1871	1	-0.094547	0.62259	0.89429	1	10397	1	-0.094547
SYT12	4	0.048912	0.00071325	0.006806	1872	2	-0.46726	0.95615	0.99774	1	16261	0	-0.46726
SCNM1	4	0.049086	0.00071325	0.006806	1873	2	-0.39019	0.77176	0.95625	1	12852	0	-0.39019
OLFM4	4	0.049113	0.00071325	0.006806	1874	2	-0.29089	0.69957	0.92247	1	11660	0	-0.29089
SLC39A14	4	0.049247	0.00071325	0.006806	1875	2	-0.43007	0.93737	0.99591	1	15883	0	-0.43007
C1orf105	4	0.0493	0.00071325	0.006806	1876	2	-0.29662	0.72506	0.94447	1	12077	0	-0.29662
OR1K1	4	0.049317	0.00071325	0.006806	1877	1	-0.035939	0.59312	0.88381	1	9950	1	-0.035939
COA3	4	0.049474	0.00071325	0.006806	1878	2	-0.50554	0.4504	0.82638	1	8049	1	-0.50554
KCNK18	4	0.049541	0.00071325	0.006806	1879	2	-0.17182	0.7	0.92247	1	11673	0	-0.17182
C19orf43	4	0.049555	0.00071325	0.006806	1880	2	-0.42249	0.87755	0.98593	1	14771	0	-0.42249
SEC31B	4	0.049643	0.00071325	0.006806	1881	1	-0.267	0.96843	0.9989	1	16564	0	-0.267
GTF2H3	4	0.049698	0.00071325	0.006806	1882	1	-0.025193	0.64508	0.8994	1	10765	0	-0.025193
ABCF1	4	0.049807	0.00071325	0.006806	1883	2	-0.2312	0.77063	0.95625	1	12834	0	-0.2312	0.049807
UVRAG	4	0.049891	0.00071325	0.006806	1884	2	-0.32827	0.97285	0.99906	1	16689	0	-0.32827
HSD17B6	4	0.049904	0.00071325	0.006806	1885	2	-0.20973	0.83364	0.9742	1	13960	0	-0.20973
CENPJ	4	0.049999	0.00071325	0.006806	1886	2	-0.42417	0.99363	0.99988	1	17315	0	-0.42417
CCL25	4	0.050024	0.00071325	0.006806	1887	1	-0.098998	0.6412	0.89429	1	10705	0	-0.098998
ARMC6	4	0.050026	0.00071325	0.006806	1888	2	-0.28356	0.50806	0.863	1	8743	1	-0.28356
BEST3	4	0.050106	0.00071325	0.006806	1889	2	-0.49902	0.99284	0.99988	1	17274	0	-0.49902
EVA1A	4	0.050133	0.00071325	0.006806	1890	1	-0.26667	0.18838	0.63644	1	5140	1	-0.26667
TRAT1	3	0.05016	0.0023608	0.020815	1891	2	-0.56249	0.77966	0.95113	1	12997	0	-0.56249
SGOL2	4	0.050242	0.00071325	0.006806	1892	1	-0.23706	0.96857	0.9989	1	16569	0	-0.23706
FRMD3	4	0.050336	0.00071325	0.006806	1893	2	-0.22448	0.80839	0.96838	1	13528	0	-0.22448
NRG2	4	0.050688	0.00071325	0.006806	1894	2	-0.25907	0.89297	0.99	1	15047	0	-0.25907
FAM120C	4	0.050715	0.00071325	0.006806	1895	2	-0.40587	0.39132	0.76888	1	7397	1	-0.40587
LCT	4	0.050742	0.00071325	0.006806	1896	2	-0.23567	0.45173	0.82638	1	8063	1	-0.23567
TTC13	4	0.050756	0.00071325	0.006806	1897	2	-0.28632	0.92026	0.99374	1	15550	0	-0.28632
TFDP1	4	0.050823	0.00071325	0.006806	1898	2	-0.44156	0.33395	0.74783	1	6824	1	-0.44156
PPP1R36	4	0.051	0.00071325	0.006806	1899	2	-0.071052	0.55432	0.86822	1	9367	1	-0.071052
HIST3H3	4	0.051068	0.00071325	0.006806	1900	2	-0.32532	0.43062	0.79501	1	7814	1	-0.32532
SRSF7	4	0.051354	0.00071325	0.006806	1901	2	-0.47857	0.79121	0.96388	1	13228	0	-0.47857	0.051354
UBE2L3	4	0.051437	0.00071325	0.006806	1902	1	-0.18576	0.86793	0.98223	1	14602	0	-0.18576	0.051437
VEGFB	4	0.051476	0.00071325	0.006806	1903	2	-0.23728	0.63063	0.89429	1	10527	1	-0.23728
ABCA9	4	0.051695	0.00071325	0.006806	1904	2	-0.26652	0.83749	0.9742	1	14034	0	-0.26652
PRPF38B	4	0.051763	0.00071325	0.006806	1905	2	-0.38914	0.93346	0.99544	1	15814	0	-0.38914	0.051763
C18orf21	4	0.051818	0.0015255	0.013578	1906	2	-0.29843	0.58057	0.87864	1	9771	1	-0.29843
PRLH	4	0.051886	0.0015255	0.013578	1907	2	-0.33711	0.97397	0.9992	1	16720	0	-0.33711
LRP2	4	0.0519	0.0015255	0.013578	1908	2	-0.39073	0.95432	0.99742	1	16225	0	-0.39073
CYBA	4	0.051927	0.0015255	0.013578	1909	2	-0.51656	0.97945	0.99962	1	16846	0	-0.51656
DLD	4	0.051954	0.0015255	0.013578	1910	2	-0.36609	0.9194	0.99374	1	15531	0	-0.36609
TRAF4	4	0.052037	0.0015255	0.013578	1911	2	-0.2373	0.356	0.74783	1	7049	1	-0.2373
CCDC86	4	0.052133	0.0015255	0.013578	1912	2	-0.52851	0.87673	0.98593	1	14759	0	-0.52851
ZBTB12	4	0.052215	0.0015255	0.013578	1913	2	-0.26548	0.93657	0.99544	1	15869	0	-0.26548
FBXO32	4	0.052297	0.0015255	0.013578	1914	2	-0.40357	0.78619	0.96388	1	13122	0	-0.40357
FBXL3	4	0.052305	0.0015255	0.013578	1915	2	-0.14675	0.54532	0.863	1	9247	1	-0.14675
ANKK1	4	0.05236	0.0015255	0.013578	1916	1	-0.042301	0.83918	0.9742	1	14065	0	-0.042301
C11orf70	4	0.052503	0.0015255	0.013578	1917	2	-0.39681	0.99063	0.99984	1	17197	0	-0.39681
SNF8	4	0.052631	0.0015255	0.013578	1918	1	-0.074476	0.17398	0.62793	1	4827	1	-0.074476
RGS10	4	0.052751	0.0015255	0.013578	1919	2	-0.067117	0.052586	0.35193	1	2164	2	-0.067117
LMOD1	4	0.052917	0.0015255	0.013578	1920	2	-0.20953	0.74927	0.9535	1	12461	0	-0.20953
TNPO2	4	0.053055	0.0015255	0.013578	1921	2	-0.39443	0.61745	0.89429	1	10304	1	-0.39443
ARVCF	4	0.053065	0.0015255	0.013578	1922	1	-0.24207	0.63503	0.89429	1	10603	0	-0.24207
TXNL4B	4	0.053068	0.0015255	0.013578	1923	2	-0.37312	0.93169	0.99544	1	15780	0	-0.37312
C21orf2	4	0.053082	0.0015255	0.013578	1924	2	-0.44247	0.82934	0.9742	1	13886	0	-0.44247
TRMT10A	4	0.053179	0.0015255	0.013578	1925	2	-0.074383	0.5078	0.863	1	8739	1	-0.074383
PWWP2A	4	0.053228	0.0015255	0.013578	1926	1	0.25889	0.010874	0.15199	1	715	2	0.25889
SGSM1	4	0.053248	0.0015255	0.013578	1927	2	-0.26485	0.88199	0.98905	1	14857	0	-0.26485
SFXN3	4	0.053331	0.0015255	0.013578	1928	2	-0.28973	0.55012	0.863	1	9316	1	-0.28973
CES1	4	0.053373	0.0015255	0.013578	1929	2	-0.41757	0.94534	0.99673	1	16049	0	-0.41757
NOSTRIN	4	0.0534	0.0015255	0.013578	1930	2	-0.42976	0.73341	0.94761	1	12203	0	-0.42976
PFN2	4	0.05347	0.0015255	0.013578	1931	2	-0.35855	0.97428	0.9992	1	16724	0	-0.35855
COL13A1	4	0.053497	0.0015255	0.013578	1932	2	-0.2575	0.3677	0.74783	1	7160	1	-0.2575
SLC16A6	4	0.053622	0.0015255	0.013578	1933	2	-0.15237	0.18385	0.63644	1	5047	2	-0.15237
MRPL35	4	0.053661	0.0015255	0.013578	1934	2	-0.46595	0.88931	0.99	1	14980	0	-0.46595
OR6N1	4	0.053716	0.0015255	0.013578	1935	2	-0.37166	0.67673	0.9091	1	11269	0	-0.37166
ARID1A	4	0.053747	0.0015255	0.013578	1936	2	-0.3826	0.36408	0.74783	1	7127	1	-0.3826
CLPTM1	4	0.053817	0.0015255	0.013578	1937	2	-0.43845	0.97485	0.9992	1	16738	0	-0.43845
ZBTB5	4	0.053824	0.0015255	0.013578	1938	1	-0.054739	0.87241	0.98477	1	14677	0	-0.054739
ARTN	4	0.053844	0.0015255	0.013578	1939	2	-0.34717	0.54663	0.863	1	9264	1	-0.34717
TMEM242	4	0.053987	0.0015255	0.013578	1940	2	-0.23681	0.88145	0.98905	1	14849	0	-0.23681
ZNF131	4	0.054095	0.0015255	0.013578	1941	2	-0.42012	0.88065	0.98905	1	14839	0	-0.42012	0.054095
SELRC1	4	0.054137	0.0015255	0.013578	1942	2	-0.43963	0.76116	0.9535	1	12671	0	-0.43963
ABCG4	4	0.054203	0.0015255	0.013578	1943	1	0.14115	0.19905	0.6451	1	5364	1	0.14115
PREB	4	0.054346	0.0015255	0.013578	1944	2	-0.60468	0.9562	0.99774	1	16262	0	-0.60468	0.054346
POP5	4	0.054374	0.0015255	0.013578	1945	2	-0.23536	0.87774	0.98593	1	14775	0	-0.23536	0.054374
SERPINH1	4	0.054429	0.0015255	0.013578	1946	2	-0.54151	0.97508	0.9992	1	16744	0	-0.54151
JPH4	3	0.054439	0.0023608	0.020815	1947	2	-0.50851	0.55057	0.82787	1	9321	0	-0.50851
AQPEP	4	0.054625	0.0015255	0.013578	1948	2	-0.46068	0.68015	0.9091	1	11331	0	-0.46068
SLC4A8	4	0.054653	0.0015255	0.013578	1949	2	-0.37096	0.311	0.73743	1	6606	1	-0.37096
RAC2	4	0.054807	0.0015255	0.013578	1950	2	-0.27794	0.72557	0.94447	1	12086	0	-0.27794
JTB	4	0.054853	0.0015255	0.013578	1951	1	-0.28086	0.62076	0.89429	1	10364	1	-0.28086
RPL31	2	0.054864	0.0024672	0.021679	1952	1	-0.86478	0.94489	0.99506	1	16042	0	-0.86478
PMVK	4	0.054919	0.0015255	0.013578	1953	2	-0.45219	0.98172	0.99962	1	16911	0	-0.45219
KHSRP	4	0.055017	0.0015255	0.013578	1954	2	-0.59744	0.98303	0.99969	1	16942	0	-0.59744
DDIT4	4	0.05507	0.0015255	0.013578	1955	2	-0.18047	0.76347	0.95625	1	12710	0	-0.18047
LETM1	3	0.055082	0.0023608	0.020815	1956	1	-0.40161	0.48548	0.79379	1	8464	1	-0.40161
NDOR1	4	0.055157	0.0015255	0.013578	1957	2	-0.44417	0.66001	0.90436	1	11014	0	-0.44417
PIPOX	4	0.055242	0.0015255	0.013578	1958	2	-0.44601	0.21853	0.66436	1	5739	1	-0.44601
SOD1	4	0.055256	0.0015255	0.013578	1959	2	-0.46377	0.41074	0.77406	1	7603	1	-0.46377
MYO7A	4	0.055523	0.0015255	0.013578	1960	2	-0.34634	0.8954	0.99	1	15090	0	-0.34634
TTC1	4	0.055537	0.0015255	0.013578	1961	2	-0.26484	0.34142	0.74783	1	6902	1	-0.26484	0.055537
MPP2	4	0.055607	0.0015255	0.013578	1962	2	-0.32255	0.37587	0.74783	1	7242	1	-0.32255
RUNDC1	4	0.055762	0.0015255	0.013578	1963	2	-0.33317	0.91931	0.99374	1	15529	0	-0.33317
FAM78A	4	0.055917	0.0015255	0.013578	1964	2	-0.44211	0.71963	0.94447	1	11980	0	-0.44211
PIWIL4	4	0.056002	0.0015255	0.013578	1965	2	-0.46108	0.92747	0.99544	1	15689	0	-0.46108
SLC5A3	4	0.056101	0.0015255	0.013578	1966	2	-0.32393	0.49624	0.85253	1	8604	1	-0.32393
RBM7	4	0.056115	0.0015255	0.013578	1967	2	-0.46842	0.94264	0.99673	1	15993	0	-0.46842
METTL14	4	0.056261	0.0015255	0.013578	1968	1	-0.21223	0.81822	0.97049	1	13681	0	-0.21223
STAG2	4	0.056356	0.0015255	0.013578	1969	2	-0.37871	0.97161	0.99906	1	16641	0	-0.37871
CD180	4	0.056423	0.0015255	0.013578	1970	1	-0.032719	0.71558	0.94125	1	11914	0	-0.032719
GEMIN2	4	0.056469	0.0015255	0.013578	1971	2	-0.41981	0.56052	0.86822	1	9453	1	-0.41981
C17orf85	4	0.056498	0.0015255	0.013578	1972	2	-0.42059	0.67716	0.9091	1	11275	0	-0.42059
PRG3	4	0.056512	0.0015255	0.013578	1973	2	-0.25583	0.62926	0.89429	1	10500	1	-0.25583
CENPL	4	0.056531	0.0015255	0.013578	1974	1	-0.062446	0.74482	0.94761	1	12388	0	-0.062446
KLHL10	3	0.056578	0.0023613	0.020815	1975	2	-0.35198	0.68802	0.91675	1	11463	0	-0.35198
PLEKHA5	4	0.056583	0.0015255	0.013578	1976	2	-0.46565	0.99691	0.99998	1	17493	0	-0.46565
TOPORS	4	0.056639	0.0015255	0.013578	1977	1	-0.26152	0.9741	0.9992	1	16723	0	-0.26152
RND2	4	0.056682	0.001526	0.013578	1978	2	-0.31392	0.96444	0.99828	1	16468	0	-0.31392
SRSF12	4	0.056796	0.001526	0.013578	1979	2	-0.39856	0.91179	0.9917	1	15383	0	-0.39856
OR5L1	4	0.056938	0.001526	0.013578	1980	2	-0.22452	0.86436	0.98223	1	14539	0	-0.22452
TACC3	4	0.056964	0.001526	0.013578	1981	2	-0.31776	0.97022	0.9989	1	16610	0	-0.31776
XAF1	4	0.05698	0.001526	0.013578	1982	2	-0.46629	0.31288	0.73743	1	6623	1	-0.46629
USP6	3	0.057093	0.0023613	0.020815	1983	2	-0.4383	0.76134	0.9452	1	12675	0	-0.4383
OR4D10	4	0.05718	0.001526	0.013578	1984	2	-0.42062	0.98715	0.99981	1	17077	0	-0.42062
DONSON	4	0.05718	0.001526	0.013578	1985	1	-0.15497	0.93884	0.99591	1	15920	0	-0.15497	0.05718
AQP11	4	0.057194	0.001526	0.013578	1986	2	-0.4231	0.99234	0.99988	1	17261	0	-0.4231
AP1B1	3	0.057202	0.0023613	0.020815	1987	1	-0.17111	0.6388	0.8902	1	10662	0	-0.17111
NUP153	4	0.057234	0.001526	0.013578	1988	2	-0.43204	0.5037	0.85772	1	8697	1	-0.43204
ACSM1	4	0.057265	0.001526	0.013578	1989	2	-0.29728	0.85017	0.97933	1	14288	0	-0.29728
MAP4K1	4	0.057342	0.001526	0.013578	1990	2	-0.291	0.72911	0.94447	1	12143	0	-0.291
HSD17B13	4	0.057408	0.001526	0.013578	1991	2	-0.38769	0.5928	0.88381	1	9945	1	-0.38769
CSRNP2	4	0.057829	0.001526	0.013578	1992	1	-0.031014	0.51863	0.863	1	8876	1	-0.031014
OR4D9	4	0.057865	0.001526	0.013578	1993	2	-0.35618	0.95441	0.99742	1	16229	0	-0.35618
CRKL	4	0.058045	0.001526	0.013578	1994	2	-0.31816	0.89579	0.99	1	15097	0	-0.31816
TRIM64C	2	0.058102	0.0024672	0.021679	1995	1	-0.4785	0.60907	0.85573	1	10194	0	-0.4785
OBSCN	4	0.058109	0.001526	0.013578	1996	2	-0.22723	0.51608	0.863	1	8839	1	-0.22723
OR2C3	4	0.058261	0.001526	0.013578	1997	1	0.015592	0.33694	0.74783	1	6848	1	0.015592
VPS13A	4	0.058382	0.001526	0.013578	1998	2	-0.31083	0.88935	0.99	1	14981	0	-0.31083
PPM1E	4	0.058411	0.001526	0.013578	1999	2	-0.48933	0.94639	0.99673	1	16068	0	-0.48933
[truncated: 16,051 more rows]
